# Supplementary material for: Guide for protein fold change and p -value calculation for non-experts in proteomics
Source: Royal Society of Chemistry journal article supplement (doi:10.1039/d0mo00087f), 2020-09-18

## Supplementary File (S3): How to install the XRealStats Add-in:

### 1. Open Excel, then go to “Options”.

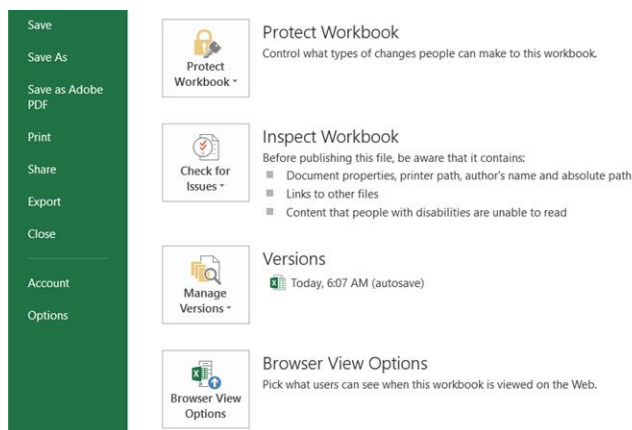

### 2. Click on “Add-ins”. In the “Manage” box: Select Excel Add-ins and click “Go”.

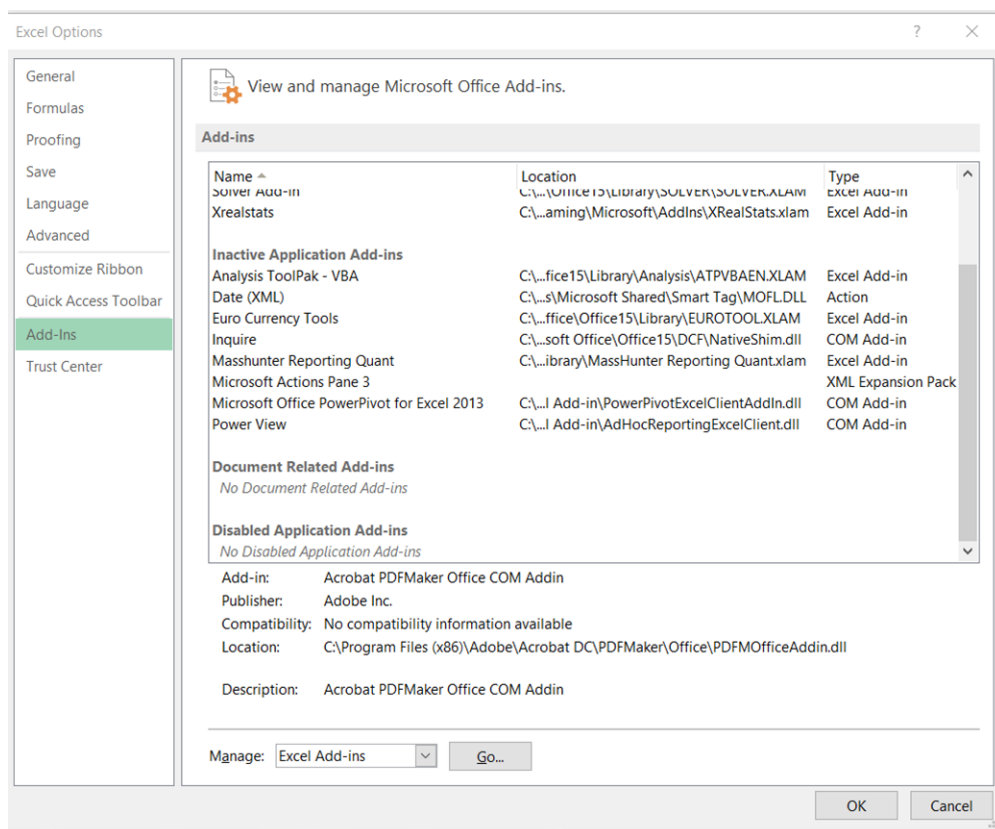

3. After downloading Xrealstats, click on “Browse” to find it in your computer. Once it is selected, it will appear in the list of Add-ins; it will need to be enabled

The default folder of the Add-ins is

C:\Users\name of computer\AppData\Roaming\Microsoft\Add-ins

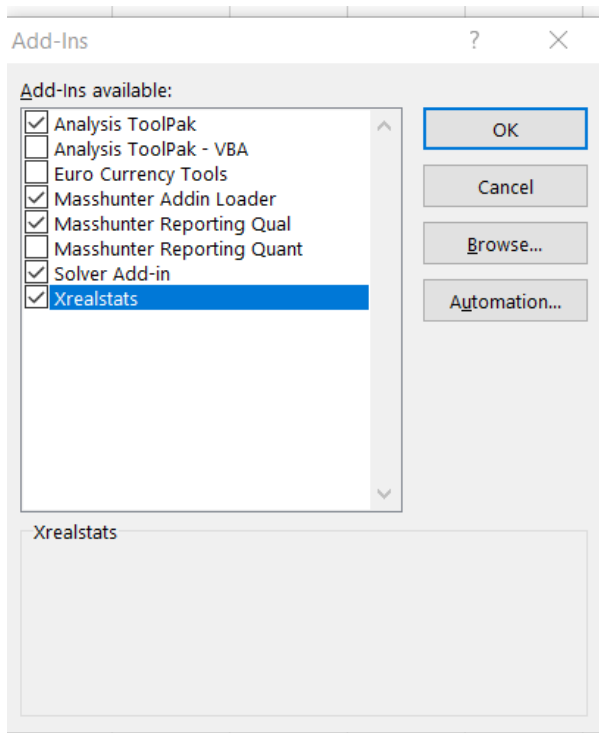

4. Open the Table S2.xls file and click on “Enable Editing”.

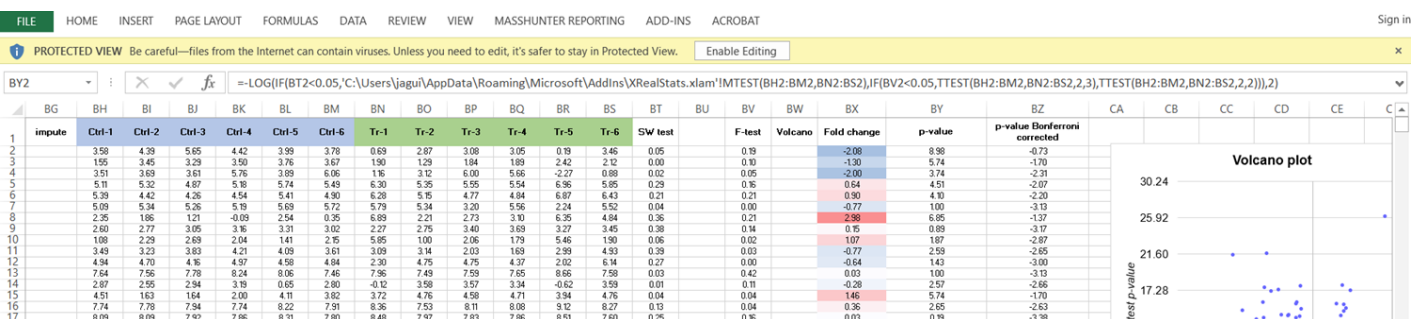

5. Notice after enabling editing that the SW test, p-value and Bonferroni columns have no values. Click on “Enable Content”.

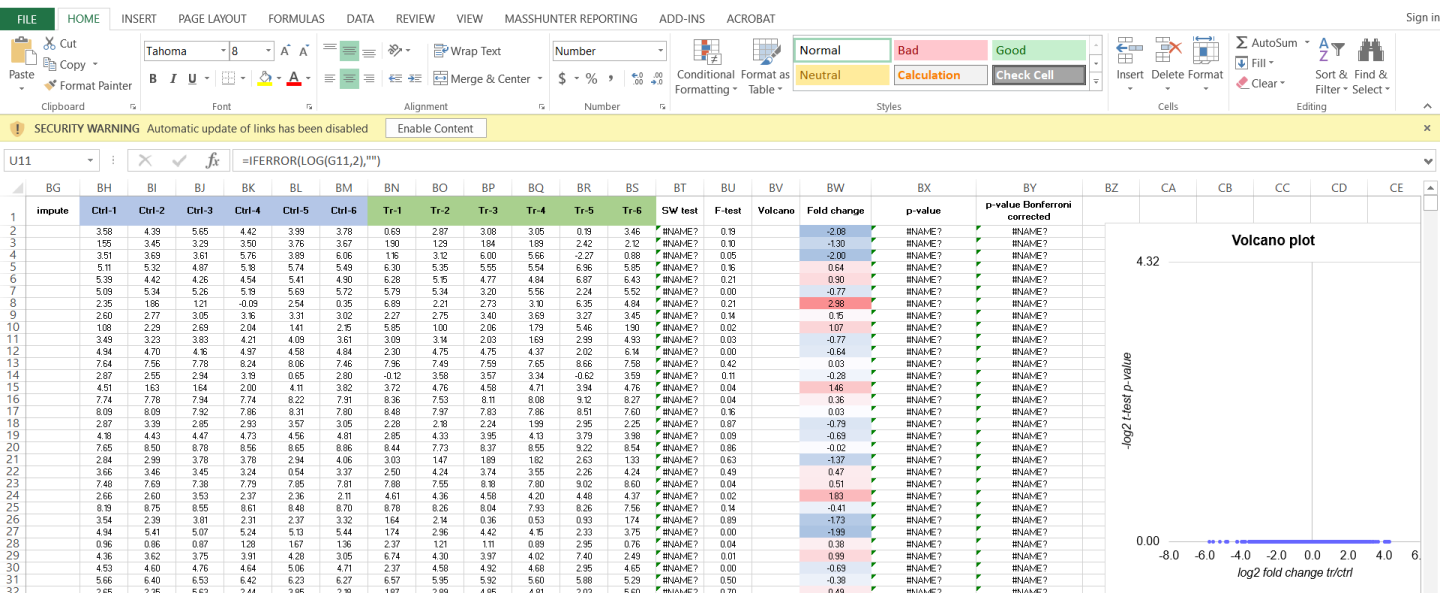

6. Click on the X to close this message.

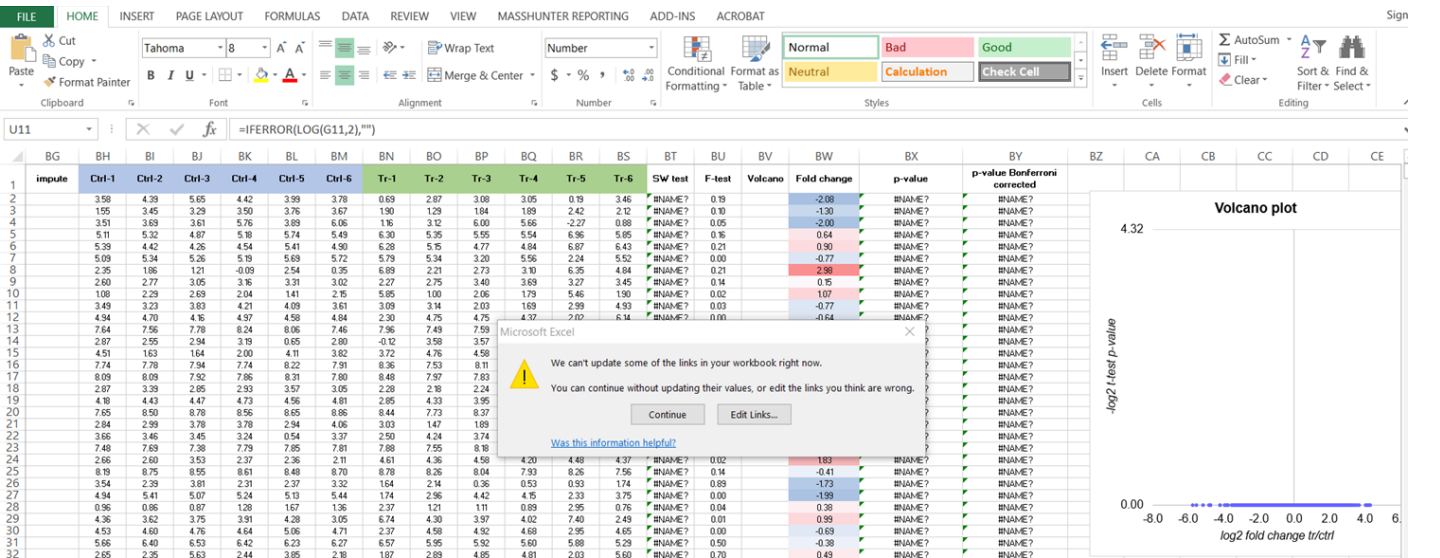

7. Click on cell “BT2” under the SW test column. You will see the links incorporated in the formula.

8. Remove both links  
‘C:\Users\Labhead\AppData\Roaming\Microsoft\AddIns\RealStats.xlam’!  
from the formula as highlighted

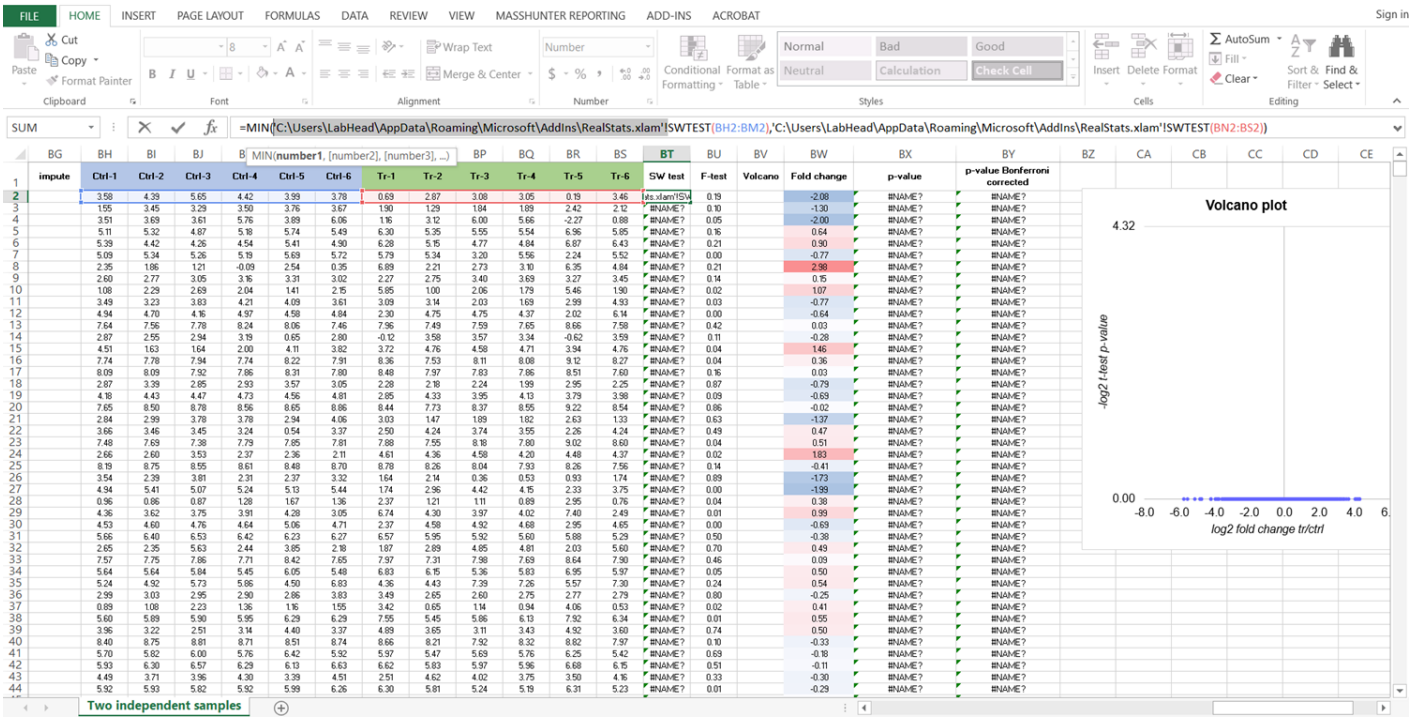

9. A valid value should appear. Fill down the formula to the end of the column.

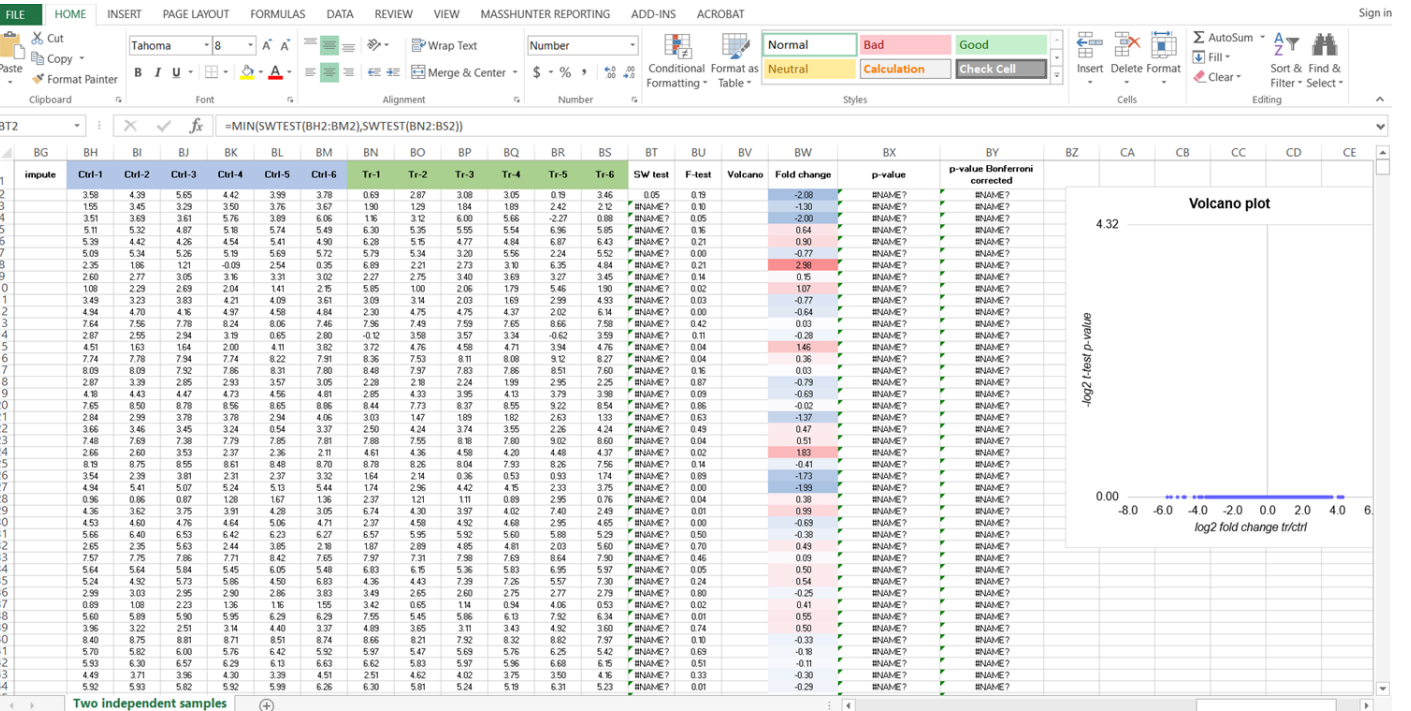

9. Repeat the same operation in the column of the p-value “BX”. This is for the Mann-Whitney test

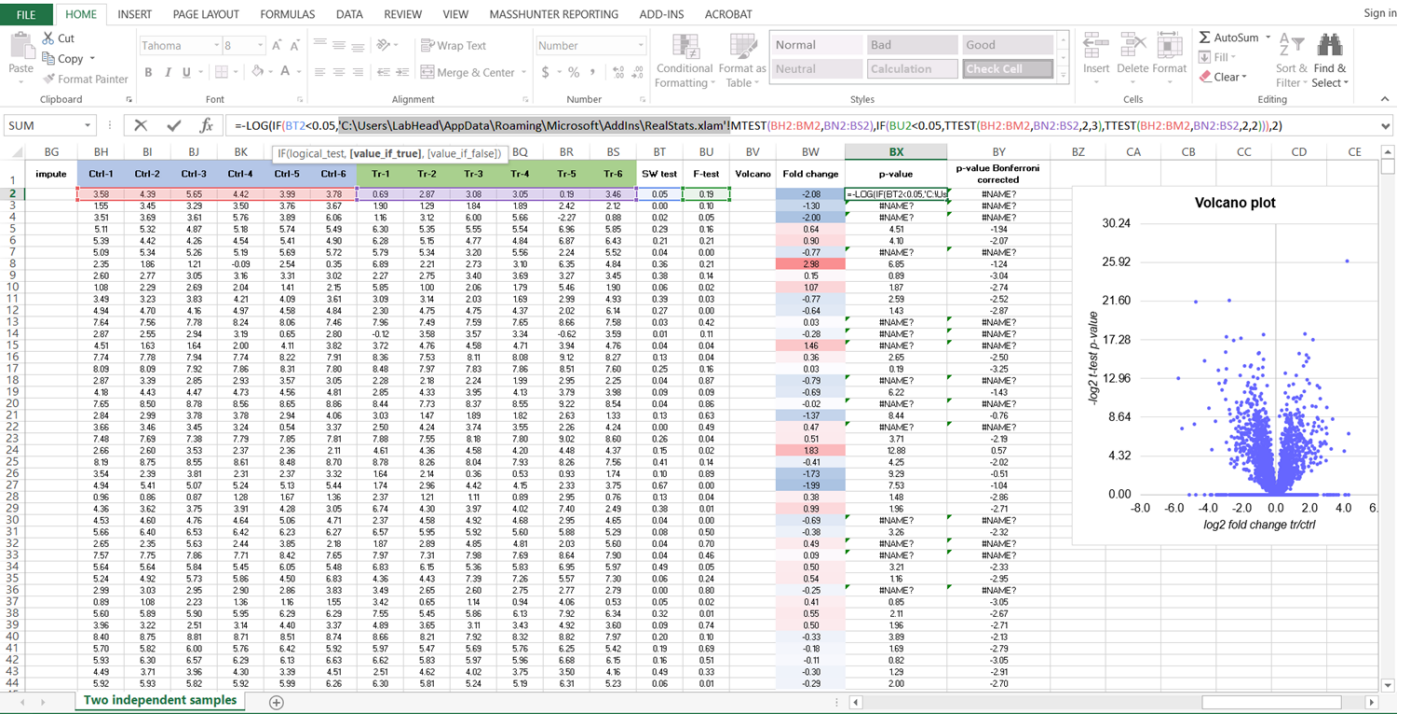

This is what spreadsheet should like if the Realstats Add-in works correctly.

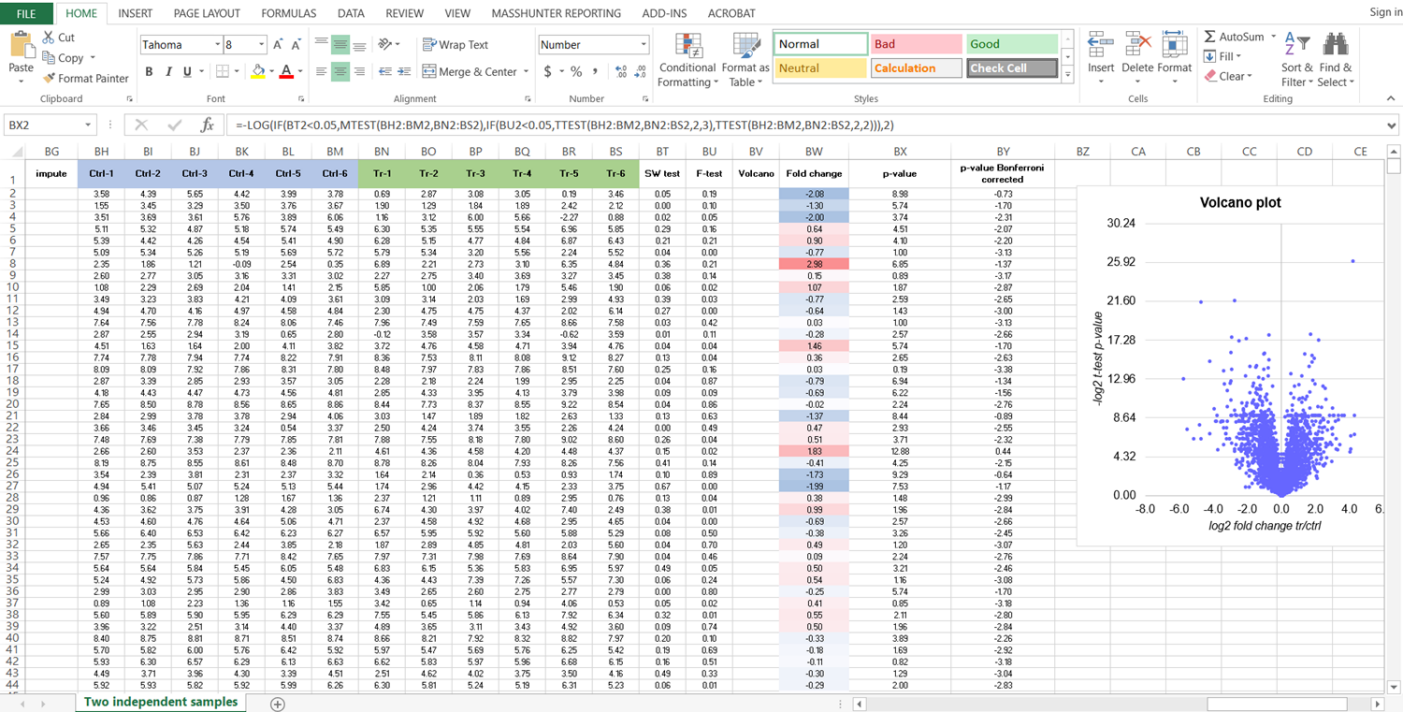

Supplement: d0mo00087f1.pdf [file d0mo00087f1.pdf]
