# Supplementary material for: Guide for protein fold change and p -value calculation for non-experts in proteomics
Source: Royal Society of Chemistry journal article supplement (doi:10.1039/d0mo00087f), 2020-09-18
Supplement: d0mo00087f3.xlsx [file d0mo00087f3.xlsx]

## Sheet: Two independent samples
Accession	Description	Gene Symbol	Ctrl-1	Ctrl-2	Ctrl-3	Ctrl-4	Ctrl-5	Ctrl-6	Tr-1	Tr-2	Tr-3	Tr-4	Tr-5	Tr-6	Counts	log2	Ctrl-1	Ctrl-2	Ctrl-3	Ctrl-4	Ctrl-5	Ctrl-6	Tr-1	Tr-2	Tr-3	Tr-4	Tr-5	Tr-6	norm	Ctrl-1	Ctrl-2	Ctrl-3	Ctrl-4	Ctrl-5	Ctrl-6	Tr-1	Tr-2	Tr-3	Tr-4	Tr-5	Tr-6	Average	Samples	Slope	norm 2	Ctrl-1	Ctrl-2	Ctrl-3	Ctrl-4
Q01082	Spectrin beta chain, non-erythrocytic 1	SPTBN1	6.3289e+07	118171888	2.67882e+08	1.23493e+08	8.35381e+07	8.17869e+07	7.50799e+06	3.85368e+07	3.2189e+07	3.47369e+07	4.42174e+06	4.11151e+07	12		25.9155	26.8163	27.997	26.8799	26.3159	26.2854	22.84	25.1997	24.9401	25.05	22.0762	25.2932		3.13712	3.78477	4.7965	3.77991	3.34564	3.15355	0.556751	2.53164	2.60926	2.5966	0.148214	2.85158	2.77429	Ctrl-1	0.876012		3.58114	4.38673	5.65385	4.41511
Q14204	Cytoplasmic dynein 1 heavy chain 1	DYNC1H1	1.84072e+07	6.76206e+07	6.67904e+07	7.17877e+07	7.30258e+07	7.7056e+07	1.48484e+07	1.46747e+07	1.55125e+07	1.75128e+07	1.45672e+07	1.91931e+07	12		24.1338	26.011	25.9931	26.0972	26.1219	26.1994	23.8238	23.8068	23.8869	24.0619	23.7962	24.1941		1.35543	2.97942	2.79261	2.99729	3.15161	3.06758	1.54056	1.13873	1.55613	1.60854	1.86825	1.7525	2.15072	Ctrl-2	0.862778		1.54727	3.45329	3.29178	3.50097
Q13813	Spectrin alpha chain, non-erythrocytic 1	SPTAN1	6.05188e+07	7.78665e+07	8.03602e+07	2.74612e+08	7.87826e+07	3.0741e+08	9.80574e+06	4.49086e+07	1.77957e+08	1.61258e+08	1.17968e+06	9.4281e+06	12		25.8509	26.2145	26.26	28.0328	26.2314	28.1956	23.2252	25.4205	27.4069	27.2648	20.17	23.1685		3.07255	3.18296	3.05945	4.93287	3.26108	5.06377	0.94195	2.7524	5.07615	4.81143	-1.75801	0.726952	2.92696	Ctrl-3	0.84836		3.50743	3.6892	3.60632	5.76182
P49327	Fatty acid synthase	FASN	1.60293e+08	2.06025e+08	1.69064e+08	1.93942e+08	2.30616e+08	2.21113e+08	1.77673e+08	1.75621e+08	1.36617e+08	1.50486e+08	1.6616e+08	1.61164e+08	12		27.2561	27.6182	27.333	27.531	27.7809	27.7202	27.4046	27.3879	27.0256	27.1651	27.308	27.264		4.47781	4.5867	4.13247	4.4311	4.81062	4.58839	5.1214	4.7198	4.69476	4.71169	5.38003	4.82237	4.70643	Ctrl-4	0.856131		5.11158	5.31621	4.87113	5.17573
P15924	Desmoplakin	DSP	1.90254e+08	1.20362e+08	1.17985e+08	1.3285e+08	1.9042e+08	1.56755e+08	1.75924e+08	1.55967e+08	8.67636e+07	9.93646e+07	1.58374e+08	2.24649e+08	12		27.5033	26.8428	26.814	26.9852	27.5046	27.2239	27.3904	27.2167	26.3706	26.5662	27.2388	27.7431		4.72502	3.81126	3.6135	3.88527	4.53432	4.09212	5.10713	4.54857	4.03978	4.11286	5.31079	5.30151	4.42351	Ctrl-5	0.837921		5.39378	4.41744	4.25939	4.53818
P78527	DNA-dependent protein kinase catalytic subunit	PRKDC	1.58551e+08	2.08464e+08	2.12336e+08	1.95062e+08	2.2355e+08	2.52362e+08	1.33113e+08	1.74548e+08	3.43731e+07	1.52075e+08	1.32856e+07	1.33942e+08	12		27.2404	27.6352	27.6618	27.5394	27.736	27.9109	26.9881	27.379	25.0348	27.1802	23.6634	26.997		4.46204	4.60368	4.46125	4.43941	4.76573	4.7791	4.70483	4.71096	2.70397	4.72684	1.73539	4.55545	4.22072	Ctrl-6	0.835065		5.09359	5.33588	5.25868	5.18544
O75369	Filamin-B	FLNB	2.99083e+07	2.60663e+07	1.96484e+07	8.5363e+06	3.59833e+07	1.12235e+07	2.47361e+08	2.57446e+07	2.61278e+07	3.56965e+07	1.20128e+08	9.06852e+07	12		24.834	24.6357	24.2279	23.0252	25.1008	23.42	27.882	24.6178	24.6391	25.0893	26.84	26.4344		2.05571	1.60414	1.02739	-0.0747688	2.13053	0.288195	5.5988	1.94967	2.30828	2.63591	4.91203	3.99278	2.36906	Tr-1	0.812599		2.34667	1.85928	1.21103	-0.0873334
P35580	Myosin-10	MYH10	3.49635e+07	4.48159e+07	5.79389e+07	5.85522e+07	5.62371e+07	5.28568e+07	1.82947e+07	3.58315e+07	3.8805e+07	5.05014e+07	2.29947e+07	4.08762e+07	12		25.0593	25.4175	25.788	25.8032	25.745	25.6556	24.1249	25.0947	25.2097	25.5898	24.4548	25.2848		2.28101	2.38597	2.58751	2.70327	2.77473	2.52376	1.84168	2.42663	2.87894	3.13645	2.52683	2.84317	2.57583	Tr-2	0.882475		2.60386	2.76545	3.05001	3.15755
P35579	Myosin-9	MYH9	13833094	3.36377e+07	46839654	3.01985e+07	1.85992e+07	3.18759e+07	1.377e+08	1.225e+07	1.76388e+07	1.65069e+07	7.45211e+07	1.68982e+07	12		23.7216	25.0036	25.4812	24.848	24.1487	24.926	27.037	23.5463	24.0723	23.9766	26.1511	24.0104		0.943288	1.97204	2.2807	1.74803	1.17844	1.79414	4.75371	0.878193	1.74145	1.5232	4.22318	1.56878	2.05043	Tr-3	0.846194		1.0768	2.28568	2.68837	2.04178
P02751	Fibronectin	FN1	5.99086e+07	5.90613e+07	9.18358e+07	1.09179e+08	8.83631e+07	7.40642e+07	2.9106e+07	4.54478e+07	1.73067e+07	1.55153e+07	1.97631e+07	9.53261e+07	12		25.8363	25.8157	26.4526	26.7021	26.3969	26.1423	24.7948	25.4377	24.0448	23.8872	24.2363	26.5064		3.05793	2.78417	3.25203	3.60217	3.42665	3.01045	2.51157	2.76962	1.71403	1.43382	2.30834	4.06478	2.82796	Tr-4	0.850367		3.49074	3.22699	3.83331	4.2075
Q9P2E9	Ribosome-binding protein 1	RRBP1	144809292	1.42928e+08	1.10992e+08	1.71948e+08	1.17633e+08	1.51255e+08	1.86246e+07	1.21651e+08	8.57309e+07	7.54908e+07	1.1793e+07	1.90832e+08	12		27.1096	27.0907	26.7259	27.3574	26.8097	27.1724	24.1507	26.8582	26.3533	26.1698	23.4914	27.5077		4.33125	4.05917	3.52536	4.25745	3.83943	4.04059	1.86746	4.19009	4.02251	3.71643	1.56345	5.06614	3.70661	Tr-5	0.773136		4.94428	4.70478	4.15549	4.97289
P10809	60 kDa heat shock protein, mitochondrial	HSPD1	7.44691e+08	7.89866e+08	9.3666e+08	1.19664e+09	8.85624e+08	6.89732e+08	4.50921e+08	6.49974e+08	4.527e+08	5.22831e+08	4.1425e+08	4.33943e+08	12		29.4721	29.557	29.803	30.1563	29.7221	29.3615	28.7483	29.2758	28.754	28.9618	28.6259	28.6929		6.69373	6.52549	6.60243	7.05639	6.75183	6.22964	6.46506	6.60772	6.42318	6.5084	6.69796	6.25135	6.56776	Tr-6	0.824946		7.64115	7.56335	7.78258	8.24219
Q09666	Neuroblast differentiation-associated protein AHNAK	AHNAK	4.10217e+07	3.94534e+07	5.42532e+07	5.95644e+07	1.19891e+07	4.65836e+07	4.77621e+06	5.94476e+07	4.29071e+07	4.11841e+07	2.86138e+06	4.44092e+07	12		25.2899	25.2336	25.6932	25.8279	23.5152	25.4733	22.1874	25.8251	25.3547	25.2956	21.4483	25.4044		2.51155	2.20211	2.49268	2.728	0.544926	2.3415	-0.0958113	3.15703	3.02391	2.84222	-0.479691	2.96277	2.01927				2.86703	2.55235	2.93824	3.18643
P21333	Filamin-A	FLNA	1.112e+08	2.26615e+07	2.52541e+07	2.94956e+07	8.93257e+07	8.40048e+07	4.14811e+07	1.22847e+08	7.72558e+07	9.23899e+07	3.30125e+07	8.6476e+07	12		26.7286	24.4337	24.59	24.814	26.4126	26.324	25.306	26.8723	26.2031	26.4612	24.9765	26.3658		3.95025	1.4022	1.38949	1.71405	3.44228	3.19215	3.02271	4.20419	3.87234	4.00787	3.04854	3.92421	3.09752				4.50936	1.62522	1.63785	2.00209
P14625	Endoplasmin	HSP90B1	7.89442e+08	9.00719e+08	1.02476e+09	8.87458e+08	9.73604e+08	8.94905e+08	5.67517e+08	6.67427e+08	6.13007e+08	6.71737e+08	5.30362e+08	6.45258e+08	12		29.5563	29.7465	29.9326	29.7251	29.8588	29.7372	29.0801	29.314	29.1913	29.3233	28.9824	29.2653		6.77793	6.71496	6.73211	6.62516	6.88847	6.60534	6.79684	6.64595	6.86053	6.86995	7.05443	6.82372	6.78295				7.73726	7.78296	7.93544	7.73849
P08238	Heat shock protein HSP 90-beta	HSP90AB1	9.7764e+08	1.08364e+09	1.01848e+09	9.56402e+08	1.02567e+09	8.40808e+08	6.04623e+08	8.72942e+08	5.19958e+08	5.90556e+08	3.80786e+08	4.40319e+08	12		29.8647	30.0132	29.9238	29.833	29.9339	29.6472	29.1715	29.7013	28.9538	29.1375	28.5044	28.714		7.0864	6.9817	6.72324	6.73309	6.96362	6.51538	6.88822	7.03322	6.62302	6.68413	6.57644	6.27239	6.75674				8.08939	8.09212	7.92499	7.86457
P46939	Utrophin	UTRN	4.10363e+07	6.50784e+07	5.1587e+07	5.13059e+07	6.55277e+07	5.36247e+07	1.84853e+07	2.53087e+07	1.96064e+07	1.85891e+07	1.93463e+07	2.06595e+07	12		25.2904	25.9557	25.6205	25.6126	25.9656	25.6764	24.1399	24.5931	24.2248	24.148	24.2056	24.3003		2.51206	2.92414	2.41998	2.51267	2.99531	2.54457	1.85663	1.92504	1.89402	1.69459	2.27759	1.85871	2.28461				2.86762	3.38921	2.85254	2.93492
P42704	Leucine-rich PPR motif-containing protein, mitochondrial	LRPPRC	9.08789e+07	1.21379e+08	133466850	1.48443e+08	1.16158e+08	1.4851e+08	2.54471e+07	9.41937e+07	5.35909e+07	6.53324e+07	3.04269e+07	5.5592e+07	12		26.4374	26.8549	26.9919	27.1453	26.7915	27.146	24.601	26.4891	25.6755	25.9613	24.8588	25.7284		3.65911	3.82341	3.79138	4.04538	3.82122	4.01416	2.31775	3.82104	3.34468	3.50793	2.93087	3.28679	3.53031				4.17701	4.43151	4.46907	4.72519
P11021	Endoplasmic reticulum chaperone BiP	HSPA5	7.49164e+08	1.38323e+09	1.68563e+09	1.44406e+09	1.24802e+09	1.54842e+09	5.93706e+08	7.55428e+08	7.15595e+08	8.85305e+08	5.57229e+08	7.51555e+08	12		29.4807	30.3654	30.6506	30.4275	30.217	30.5281	29.1452	29.4927	29.4146	29.7216	29.0537	29.4853		6.70237	7.33386	7.45012	7.32753	7.2467	7.39633	6.86193	6.82463	7.08377	7.26823	7.12573	7.04372	7.13874				7.65101	8.50029	8.78179	8.5589
P07814	Bifunctional glutamate/proline--tRNA ligase	EPRS	4.02653e+07	5.12447e+07	8.91702e+07	8.45713e+07	4.53577e+07	9.64046e+07	2.81976e+07	1.63772e+07	1.5969e+07	1.67789e+07	1.63457e+07	1.21733e+07	12		25.263	25.6109	26.4101	26.3337	25.4348	26.5226	24.7491	23.9652	23.9288	24.0001	23.9624	23.5372		2.4847	2.57936	3.20953	3.23372	2.46455	3.39078	2.46582	1.2971	1.59797	1.54678	2.03444	1.09563	2.28336				2.83638	2.9896	3.78322	3.77713
P04114	Apolipoprotein B-100	APOB	6.63272e+07	6.78632e+07	7.34736e+07	6.14651e+07	1.12568e+07	6.45499e+07	2.08836e+07	8.9142e+07	4.74429e+07	4.64519e+07	1.3368e+07	6.43435e+07	12		25.9831	26.0161	26.1307	25.8733	23.4243	25.9439	24.3159	26.4096	25.4997	25.4692	23.6723	25.9393		3.20477	2.98459	2.9302	2.77332	0.454002	2.81209	2.03262	3.74151	3.16889	3.01587	1.74431	3.49771	2.69665				3.65836	3.45928	3.45396	3.23936
P05787	Keratin, type II cytoskeletal 8	KRT8	6.76289e+08	8.51972e+08	7.37808e+08	9.12419e+08	784990388	8.43452e+08	4.31645e+08	6.73552e+08	6.39994e+08	5.7049e+08	5.01791e+08	7.77586e+08	12		29.3331	29.6662	29.4587	29.7651	29.5481	29.6517	28.6853	29.3272	29.2535	29.0876	28.9025	29.5344		6.55473	6.63469	6.25815	6.66517	6.57781	6.51991	6.40202	6.65912	6.92268	6.63426	6.97454	7.09284	6.65799				7.48247	7.68992	7.37676	7.78523
Q92616	eIF-2-alpha kinase activator GCN1	GCN1	3.61328e+07	4.06657e+07	7.68152e+07	3.67693e+07	3.23048e+07	3.12535e+07	6.85529e+07	9.6108e+07	7.74021e+07	6.82267e+07	4.39698e+07	6.93281e+07	12		25.1068	25.2773	26.1949	25.132	24.9452	24.8975	26.0307	26.5182	26.2059	26.0238	25.39	26.0469		2.32847	2.24577	2.99436	2.03205	1.97495	1.76569	3.74747	3.85006	3.87507	3.57047	3.46204	3.60535	2.95431				2.65804	2.60295	3.52959	2.37353
P06733	Alpha-enolase	ENO1	1.03813e+09	1.60478e+09	1.47335e+09	1.48551e+09	1.13389e+09	1.41119e+09	7.18488e+08	1.0418e+09	5.87834e+08	6.14122e+08	3.34274e+08	4.29251e+08	12		29.9513	30.5797	30.4565	30.4683	30.0786	30.3943	29.4204	29.9564	29.1308	29.1939	28.3165	28.6772		7.17301	7.54819	7.25593	7.36837	7.10834	7.26245	7.13714	7.28834	6.80003	6.74058	6.38849	6.23566	7.02554				8.18826	8.74871	8.55289	8.60659
Q9Y490	Talin-1	TLN1	6.18165e+07	3.57529e+07	9.04662e+07	3.54405e+07	3.25177e+07	6.27516e+07	1.28841e+07	2.47509e+07	6.49678e+06	7.85505e+06	6.58341e+06	1.54201e+07	12		25.8815	25.0916	26.4309	25.0789	24.9547	25.9031	23.6191	24.561	22.6313	22.9052	22.6504	23.8783		3.10316	2.06002	3.23035	1.97895	1.98443	2.77133	1.33584	1.89289	0.30049	0.451822	0.722434	1.43672	1.77237				3.54237	2.38766	3.80776	2.3115
Q15149	Plectin	PLEC	1.44637e+08	2.17376e+08	1.9049e+08	2.01755e+08	1.6215e+08	2.14791e+08	1.35681e+07	4.06405e+07	7.02951e+07	6.61802e+07	1.39004e+07	4.85302e+07	12		27.1079	27.6956	27.5051	27.588	27.2728	27.6784	23.6937	25.2764	26.0669	25.9799	23.7286	25.5324		4.32953	4.66408	4.30462	4.48808	4.30246	4.54654	1.41047	2.60833	3.73612	3.52653	1.80065	3.0908	3.56735				4.94232	5.40589	5.07405	5.24229
P12270	Nucleoprotein TPR	TPR	1.28644e+07	1.43164e+07	1.60833e+07	1.92558e+07	2.16377e+07	2.01809e+07	1.93537e+07	1.40081e+07	10143154	9.69279e+06	1.93817e+07	8.81473e+06	12		23.6169	23.7712	23.9391	24.1988	24.367	24.2665	24.2061	23.7398	23.274	23.2085	24.2082	23.0715		0.838549	0.739631	0.738535	1.09884	1.39675	1.13466	1.92286	1.07167	0.943201	0.755115	2.28022	0.6299	1.12916				0.957235	0.857267	0.870545	1.2835
O43707	Alpha-actinin-4	ACTN4	1.01496e+08	7.45399e+07	8.74553e+07	9.16983e+07	9.84281e+07	5.38609e+07	2.27299e+08	9.22556e+07	5.41343e+07	6.14471e+07	2.11041e+08	2.36006e+07	12		26.5969	26.1515	26.382	26.4504	26.5526	25.6827	27.76	26.4591	25.69	25.8728	27.653	24.4923		3.81852	3.11997	3.18152	3.35044	3.58227	2.55091	5.47677	3.79104	3.35924	3.41947	5.72498	2.05074	3.61882				4.35898	3.61619	3.7502	3.91347
Q5T4S7	E3 ubiquitin-protein ligase UBR4	UBR4	1.12819e+08	1.33918e+08	1.57991e+08	1.41276e+08	1.55416e+08	1.40594e+08	1.94419e+07	1.09671e+08	9.47738e+07	90821357	1.93683e+07	8.11718e+07	12		26.7494	26.9968	27.2353	27.0739	27.2116	27.067	24.2127	26.7086	26.498	26.4365	24.2072	26.2745		3.9711	3.96524	4.03474	3.974	4.24127	3.93514	1.92942	4.04052	4.16718	3.98316	2.27922	3.83289	3.69616				4.53315	4.5959	4.75593	4.64181
P07900	Heat shock protein HSP 90-alpha	HSP90AA1	2.23856e+08	3.92954e+08	4.48626e+08	4.05318e+08	3.05679e+08	3.47255e+08	2.06475e+08	2.53027e+08	1.69592e+08	1.56292e+08	9.32923e+07	1.17434e+08	12		27.738	28.5498	28.7409	28.5945	28.1874	28.3714	27.6214	27.9147	27.3375	27.2197	26.4753	26.8073		4.95966	5.51825	5.54041	5.49453	5.21715	5.2396	5.33814	5.24663	5.00669	4.7663	4.54728	4.36568	5.10336				5.66164	6.39591	6.53074	6.41787
O75643	U5 small nuclear ribonucleoprotein 200 kDa helicase	SNRNP200	3.59093e+07	3.49104e+07	2.64893e+08	3.83055e+07	7.6821e+07	3.25305e+07	1.46486e+07	3.90084e+07	9.07928e+07	9.76863e+07	1.18308e+07	1.40216e+08	12		25.0979	25.0572	27.9808	25.191	26.195	24.9553	23.8043	25.2173	26.4361	26.5417	23.496	27.0631		2.31952	2.02561	4.78031	2.0911	3.2247	1.82347	1.52102	2.54919	4.10527	4.08829	1.56808	4.62149	2.89317				2.64782	2.34778	5.63477	2.4425
P05783	Keratin, type I cytoskeletal 18	KRT18	7.13873e+08	8.83295e+08	9.79131e+08	8.70699e+08	1.09503e+09	7.685e+08	4.53936e+08	5.83908e+08	5.69421e+08	5.34137e+08	4.10155e+08	5.21265e+08	12		29.4111	29.7183	29.8669	29.6976	30.0283	29.5175	28.7579	29.1212	29.0849	28.9926	28.6116	28.9574		6.63276	6.68678	6.6664	6.59765	7.05802	6.38565	6.47467	6.45308	6.75412	6.53927	6.68362	6.51586	6.62066				7.57154	7.75029	7.85799	7.70636
P0DMV9	Heat shock 70 kDa protein 1B	HSPA1B	2.21444e+08	2.50244e+08	2.98567e+08	2.28555e+08	2.75929e+08	2.19585e+08	2.39598e+08	2.8599e+08	1.2248e+08	1.78558e+08	1.65524e+08	1.72642e+08	12		27.7224	27.8988	28.1535	27.768	28.0397	27.7102	27.836	28.0914	26.868	27.4118	27.3025	27.3632		4.94403	4.86722	4.95296	4.66802	5.06943	4.57838	5.5528	5.4233	4.53717	4.95845	5.3745	4.92162	4.98732				5.6438	5.64134	5.83827	5.45246
P02768	Serum albumin	ALB	172799126	1.62483e+08	2.80878e+08	2.90689e+08	1.12126e+08	4.79737e+08	5.96414e+07	9.99489e+07	4.03421e+08	4.14114e+08	7.90005e+07	3.7022e+08	12		27.3645	27.2757	28.0654	28.1149	26.7405	28.8377	25.8298	26.5747	28.5877	28.6255	26.2354	28.4638		4.58619	4.24417	4.86485	5.01495	3.77025	5.70585	3.54657	3.9066	6.25691	6.17209	4.30739	6.02222	4.8665				5.23531	4.9192	5.73441	5.8577
P02787	Serotransferrin	TF	4.42841e+07	5.24517e+07	5.4542e+07	5.03707e+07	4.32802e+07	8.42517e+07	3.63558e+07	3.37926e+07	2.42883e+07	2.89745e+07	1.75685e+07	2.81174e+07	12		25.4003	25.6445	25.7009	25.5861	25.3672	26.3282	25.1157	25.0102	24.5338	24.7883	24.0665	24.745		2.62195	2.61295	2.50034	2.48614	2.39691	3.19638	2.83244	2.34211	2.20295	2.33492	2.13852	2.30338	2.49742				2.99306	3.02853	2.94726	2.90392
P53621	Coatomer subunit alpha	COPA	1.23543e+07	1.63494e+07	3.57285e+07	2.01936e+07	1.61398e+07	2.25116e+07	3.49701e+07	9.90754e+06	1.02931e+07	1.00039e+07	3.52082e+07	7.70817e+06	12		23.5585	23.9627	25.0906	24.2674	23.9441	24.4242	25.0596	23.2401	23.2952	23.2541	25.0694	22.878		0.780173	0.931197	1.89005	1.16744	0.973829	1.29235	2.77637	0.572006	0.964366	0.800695	3.14144	0.436373	1.31052				0.890597	1.0793	2.22789	1.36363
P38646	Stress-70 protein, mitochondrial	HSPA9	2.15837e+08	2.91071e+08	3.09966e+08	3.06381e+08	3.17434e+08	3.5081e+08	3.58964e+08	1.86678e+08	1.64357e+08	2.13133e+08	2.77756e+08	2.13737e+08	12		27.6854	28.1168	28.2075	28.1908	28.2419	28.3861	28.4193	27.476	27.2923	27.6672	28.0492	27.6713		4.90704	5.08526	5.00701	5.0908	5.27159	5.25429	6.13602	4.80789	4.96145	5.21382	6.12127	5.22968	5.25718				5.60157	5.89406	5.90199	5.94629
P01024	Complement C3	C3	7.96924e+07	5.87128e+07	4.21704e+07	5.80763e+07	1.05647e+08	6.45049e+07	8.03612e+07	61973162	32767738	43358230	55596218	4.45959e+07	12		26.2479	25.8072	25.3297	25.7914	26.6547	25.9429	26.26	25.8851	24.9658	25.3698	25.7285	25.4104		3.46961	2.77563	2.1292	2.6915	3.68438	2.81108	3.97675	3.21705	2.63497	2.91644	3.80051	2.96882	3.08966				3.96069	3.21709	2.50979	3.1438
P04406	Glyceraldehyde-3-phosphate dehydrogenase	GAPDH	1.17798e+09	1.60217e+09	1.71082e+09	1.57625e+09	1.15159e+09	1.44331e+09	6.70315e+08	1.00988e+09	5.49091e+08	7.76054e+08	4.50878e+08	5.4429e+08	12		30.1337	30.5774	30.672	30.5539	30.101	30.4267	29.3203	29.9115	29.0325	29.5316	28.7482	29.0198		7.35534	7.54584	7.47152	7.45391	7.13068	7.29491	7.03702	7.24345	6.70167	7.07822	6.82019	6.57822	7.14258				8.39639	8.74598	8.80701	8.70651
P13667	Protein disulfide-isomerase A4	PDIA4	2.29149e+08	2.77667e+08	3.29003e+08	2.73665e+08	3.4121e+08	2.83494e+08	1.47264e+08	1.89472e+08	1.48393e+08	1.70885e+08	1.13577e+08	126029578	12		27.7717	28.0488	28.2935	28.0278	28.3461	28.0787	27.1338	27.4974	27.1448	27.3485	26.7591	26.9092		4.99338	5.01724	5.093	4.92789	5.37579	4.94692	4.85059	4.82932	4.81404	4.89509	4.83112	4.4676	4.92016				5.70013	5.81522	6.00335	5.756
P14618	Pyruvate kinase PKM	PKM	2.63416e+08	3.70063e+08	4.60441e+08	3.76493e+08	2.88458e+08	4.26516e+08	2.11948e+08	2.35868e+08	1.7475e+08	1.92328e+08	1.43025e+08	1.91551e+08	12		27.9728	28.4632	28.7784	28.488	28.1038	28.668	27.6591	27.8134	27.3807	27.519	27.0917	27.5132		5.19444	5.43166	5.57792	5.3881	5.13349	5.5362	5.37589	5.14531	5.04992	5.06563	5.16372	5.07157	5.26115				5.92964	6.29555	6.57494	6.29355
P01023	Alpha-2-macroglobulin	A2M	1.09808e+08	7.89701e+07	9.87218e+07	1.15292e+08	5.89753e+07	1.25324e+08	2.09965e+07	1.12705e+08	5.58246e+07	5.22563e+07	2.60268e+07	6.1482e+07	12		26.7104	26.2348	26.5569	26.7807	25.8136	26.9011	24.3236	26.748	25.7344	25.6391	24.6335	25.8737		3.93207	3.20326	3.35634	3.68077	2.84331	3.76927	2.0404	4.07989	3.4036	3.18574	2.70553	3.43208	3.30269				4.48861	3.71273	3.95627	4.29931
P13639	Elongation factor 2	EEF2	2.61957e+08	2.97906e+08	2.946e+08	3.01629e+08	2.6716e+08	3.43861e+08	1.77594e+08	2.33594e+08	1.14275e+08	1.2252e+08	1.17592e+08	1.13218e+08	12		27.9648	28.1503	28.1342	28.1682	27.9931	28.3573	27.404	27.7994	26.7679	26.8684	26.8092	26.7545		5.18642	5.11874	4.93366	5.06825	5.02284	5.22543	5.12076	5.13134	4.43714	4.41507	4.88124	4.31295	4.90449				5.9205	5.93286	5.81553	5.91995
P08133	Annexin A6	ANXA6	7.53469e+07	1.26922e+08	1.5443e+08	1.26674e+08	8.12134e+07	1.18132e+08	4.83368e+07	7.21513e+07	1.16119e+08	6.80823e+07	4.5466e+07	5.73032e+07	12		26.167	26.9194	27.2024	26.9165	26.2752	26.8158	25.5266	26.1045	26.791	26.0208	25.4383	25.7721		3.38871	3.88783	4.00185	3.8166	3.30492	3.684	3.24337	3.43643	4.46022	3.56741	3.51031	3.33053	3.63602				3.86834	4.50617	4.71716	4.45796
P49792	E3 SUMO-protein ligase RanBP2	RANBP2	1.60276e+08	8.90031e+07	9.75816e+07	9.18278e+07	3.35236e+06	6.07771e+07	68442584	8.56343e+07	7.70255e+07	7.46687e+07	8.94978e+07	8.14233e+07	12		27.256	26.4074	26.5401	26.4524	21.6767	25.857	26.0284	26.3517	26.1988	26.154	26.4153	26.2789		4.47765	3.37581	3.33958	3.35248	-1.29355	2.7252	3.74515	3.6836	3.86803	3.70063	4.48738	3.83735	3.27494				5.11141	3.91273	3.93652	3.91585
Q13576	Ras GTPase-activating-like protein IQGAP2	IQGAP2	1.04424e+08	1.37975e+08	3.49148e+07	2.86263e+07	1.54077e+08	2.73642e+07	2.38229e+07	16387229	1.62768e+07	1.32777e+07	2.37809e+07	1.72926e+07	12		26.6379	27.0398	25.0573	24.7708	27.1991	24.7058	24.5058	23.9661	23.9563	23.6625	24.5033	24.0436		3.85955	4.00829	1.85681	1.67089	4.22879	1.57397	2.2226	1.29798	1.62551	1.20913	2.57533	1.60206	2.31091				4.40582	4.6458	2.18871	1.95168
P07237	Protein disulfide-isomerase	P4HB	3.25093e+08	4.33514e+08	534403455	4.61649e+08	4.33679e+08	4.98638e+08	2.62476e+08	2.60199e+08	2.61357e+08	2.65639e+08	1.86961e+08	2.7064e+08	12		28.2763	28.6915	28.9934	28.7822	28.6921	28.8934	27.9676	27.955	27.9614	27.9849	27.4782	28.0118		5.49794	5.65996	5.79283	5.68227	5.72176	5.7616	5.68437	5.28695	5.63064	5.53152	5.55019	5.57022	5.61419				6.27611	6.56017	6.82827	6.63716
P05023	Sodium/potassium-transporting ATPase subunit alpha-1	ATP1A1	1.97213e+08	2.02023e+08	2.44323e+08	2.31315e+08	2.21746e+08	1.86018e+08	1.40164e+08	1.92213e+08	1.48195e+08	1.61947e+08	1.46913e+08	1.83636e+08	12		27.5552	27.5899	27.8642	27.7853	27.7243	27.4709	27.0625	27.5181	27.1429	27.271	27.1304	27.4523		4.77684	4.5584	4.66369	4.68533	4.75404	4.33905	4.7793	4.85004	4.81212	4.81758	5.20241	5.01069	4.77079				5.45295	5.28341	5.4973	5.47269
P02771	Alpha-fetoprotein	AFP	1.45616e+08	1.40088e+08	266022352	2.74423e+08	9.69603e+07	4.13427e+08	4.75702e+07	9.14267e+07	7.83394e+07	1.25022e+08	7.33547e+07	1.64966e+08	12		27.1176	27.0618	27.987	28.0318	26.5309	28.6231	25.5036	26.4461	26.2232	26.8976	26.1284	27.2976		4.33926	4.03022	4.78645	4.93188	3.5606	5.49124	3.22031	3.77802	3.89243	4.44424	4.20042	4.85601	4.29426				4.95343	4.67121	5.642	5.76066
P02545	Prelamin-A/C	LMNA	8.84969e+07	1.02211e+08	1.17649e+08	1.12932e+08	1.23235e+08	1.0214e+08	2.04407e+08	8.87171e+07	1.0898e+08	1.13179e+08	1.24906e+08	8.9504e+07	12		26.3991	26.607	26.8099	26.7509	26.8768	26.606	27.6069	26.4027	26.6995	26.754	26.8963	26.4154		3.62079	3.57544	3.60939	3.65094	3.90654	3.47415	5.32363	3.73462	4.36869	4.30067	4.9683	3.97386	4.04225				4.13327	4.1441	4.25456	4.26446
P34932	Heat shock 70 kDa protein 4	HSPA4	1.04348e+08	1.10087e+08	1.19262e+08	1.33729e+08	8.72564e+07	1.30938e+08	6.03831e+07	8.80406e+07	8.64981e+07	9.2111e+07	5.46513e+07	1.08622e+08	12		26.6368	26.7141	26.8296	26.9947	26.3788	26.9643	25.8476	26.3917	26.3662	26.4569	25.7038	26.6947		3.85849	3.68253	3.62904	3.89479	3.40846	3.83249	3.5644	3.72358	4.03536	4.0035	3.77578	4.25316	3.80513				4.40461	4.26823	4.27771	4.54929
P40939	Trifunctional enzyme subunit alpha, mitochondrial	HADHA	1.30458e+08	1.31874e+08	1.4695e+08	1.48132e+08	1.76799e+08	1.5321e+08	1.28593e+08	1.20971e+08	1.23755e+08	1.14567e+08	1.04536e+08	1.4108e+08	12		26.959	26.9746	27.1308	27.1423	27.3975	27.1909	26.9382	26.8501	26.8829	26.7716	26.6394	27.0719		4.18067	3.94304	3.93023	4.04236	4.42724	4.05912	4.65499	4.18199	4.55211	4.31826	4.71145	4.63035	4.30265				4.7724	4.57017	4.63274	4.72167
O60701	UDP-glucose 6-dehydrogenase	UGDH	3.45352e+08	4.36693e+08	4.8806e+08	4.66685e+08	4.49603e+08	4.52361e+08	2.14691e+08	2.96838e+08	2.39464e+08	2.75515e+08	2.03554e+08	2.54227e+08	12		28.3635	28.702	28.8625	28.7979	28.7441	28.7529	27.6777	28.1451	27.8352	28.0376	27.6008	27.9215		5.58516	5.67051	5.66196	5.69792	5.77378	5.62108	5.39444	5.47701	5.50443	5.58419	5.67286	5.47996	5.59361				6.37567	6.57238	6.67401	6.65544
Q9GZU2	Paternally-expressed gene 3 protein	PEG3	1.52742e+08	1.15298e+08	1.07475e+08	1.07443e+08	1.68885e+08	1.45574e+08	3.63097e+07	1.31441e+08	6.40949e+07	6.97255e+07	5.36393e+07	7.18525e+07	12		27.1865	26.7808	26.6794	26.679	27.3315	27.1172	25.1139	26.9698	25.9337	26.0552	25.6768	26.0985		4.40819	3.74926	3.47891	3.57905	4.36117	3.98536	2.83061	4.30176	3.6029	3.60182	3.74882	3.65695	3.7754				5.03211	4.34557	4.10074	4.18049
Q00839	Heterogeneous nuclear ribonucleoprotein U	HNRNPU	1.92866e+08	1.94782e+08	1.88485e+08	2.79885e+08	2.25897e+08	2.6488e+08	1.1226e+08	1.66524e+08	1.58434e+08	169026080	1.16946e+08	2.31308e+08	12		27.523	27.5373	27.4899	28.0603	27.7511	27.9808	26.7423	27.3112	27.2393	27.3327	26.8013	27.7852		4.74469	4.50575	4.28935	4.96031	4.7808	4.84894	4.45902	4.64307	4.90851	4.8793	4.8733	5.34366	4.76972				5.41624	5.22237	5.05606	5.79387
P04075	Fructose-bisphosphate aldolase A	ALDOA	8.21404e+08	7.81915e+08	7.90284e+08	8.16988e+08	5.27629e+08	6.90183e+08	5.67291e+08	9.16707e+08	5.87458e+08	6.04217e+08	2.43502e+08	3.0145e+08	12		29.6135	29.5424	29.5578	29.6057	28.9749	29.3624	29.0795	29.7719	29.1299	29.1705	27.8594	28.1673		6.83519	6.5109	6.35727	6.50579	6.00466	6.23058	6.79627	7.1038	6.79911	6.71713	5.93139	5.72576	6.45982				7.80262	7.54644	7.4936	7.59907
P55072	Transitional endoplasmic reticulum ATPase	VCP	109381192	1.43348e+08	1.73837e+08	1.47141e+08	9.60006e+07	1.69307e+08	8.69183e+07	9.57137e+07	5.81007e+07	6.61895e+07	3.51948e+07	4.84086e+07	12		26.7048	27.0949	27.3732	27.1326	26.5165	27.3351	26.3732	26.5122	25.7921	25.9801	25.0689	25.5288		3.92646	4.06341	4.17264	4.03268	3.54625	4.20325	4.08991	3.84413	3.46125	3.52673	3.14089	3.08718	3.7579				4.4822	4.70968	4.91848	4.71035
P12814	Alpha-actinin-1	ACTN1	4.40814e+07	9.39291e+07	3.79896e+08	8.41828e+07	6.77142e+07	7.91145e+07	3.37926e+07	3.87605e+07	2.17087e+07	2.39225e+07	1.50125e+07	1.98816e+07	12		25.3937	26.4851	28.501	26.327	26.013	26.2374	25.0102	25.2081	24.3718	24.5119	23.8397	24.2449		2.61533	3.45353	5.30051	3.22708	3.04266	3.10562	2.72696	2.53999	2.04096	2.0585	1.91169	1.80335	2.81885				2.9855	4.0028	6.24795	3.76937
P00367	Glutamate dehydrogenase 1, mitochondrial	GLUD1	4.78137e+08	3.93271e+08	4.70227e+08	5.01904e+08	4.33222e+08	3.85692e+08	2.75003e+08	4.11423e+08	2.92542e+08	3.25117e+08	2.54316e+08	2.88936e+08	12		28.8328	28.5509	28.8088	28.9028	28.6905	28.5229	28.0349	28.616	28.1241	28.2764	27.922	28.1062		6.05452	5.51941	5.60826	5.80289	5.72024	5.39105	5.75163	5.94796	5.79326	5.82302	5.99408	5.66459	5.75591				6.91146	6.39726	6.61071	6.77804
Q9HC35	Echinoderm microtubule-associated protein-like 4	EML4	6.77111e+07	143301030	1.61663e+08	1.20209e+08	5.8935e+07	1.27692e+08	3.25473e+07	5.23146e+07	76966793	9.41875e+07	3.23744e+07	8.36021e+07	12		26.0129	27.0945	27.2684	26.841	25.8126	26.9281	24.956	25.6407	26.1977	26.489	24.9483	26.317		3.23456	4.06293	4.06789	3.74102	2.84233	3.79627	2.67279	2.97262	3.86693	4.03567	3.02038	3.87545	3.51574				3.69237	4.70913	4.79501	4.36968
P54886	Delta-1-pyrroline-5-carboxylate synthase	ALDH18A1	1.82265e+08	2.1576e+08	2.9444e+08	2.57278e+08	2.58214e+08	2.32814e+08	9.77573e+07	1.84323e+08	1.6173e+08	1.85867e+08	1.14462e+08	2.16809e+08	12		27.4415	27.6849	28.1334	27.9388	27.944	27.7946	26.5427	27.4577	27.269	27.4697	26.7703	27.6918		4.66313	4.65331	4.93287	4.83881	4.9737	4.66278	4.25946	4.78957	4.93821	5.01633	4.84233	5.25026	4.8184				5.32314	5.39341	5.8146	5.65195
O95573	Long-chain-fatty-acid--CoA ligase 3	ACSL3	1.03708e+08	1.3303e+08	1.8849e+08	1.3863e+08	7.44691e+07	1.75185e+08	9.62287e+07	1.06305e+08	6.66339e+07	8.99282e+07	7.54314e+07	8.12895e+07	12		26.628	26.9872	27.4899	27.0467	26.1501	27.3843	26.52	26.6636	25.9898	26.4223	26.1687	26.2766		3.84962	3.95563	4.28939	3.94671	3.17984	4.25248	4.23672	3.99554	3.65895	3.9689	4.24069	3.83498	3.95079				4.39448	4.58477	5.0561	4.60994
O75533	Splicing factor 3B subunit 1	SF3B1	30359019	1.32274e+08	1.00312e+08	1.05126e+08	1.14926e+08	1.13808e+08	1.02658e+07	3.09954e+07	3.22806e+07	3.63025e+07	8.37172e+06	3.6325e+07	12		24.8556	26.979	26.5799	26.6475	26.7761	26.762	23.2913	24.8856	24.9442	25.1136	22.9971	25.1145		2.07729	3.94741	3.37939	3.54759	3.80584	3.63021	1.00809	2.21746	2.61336	2.6602	1.06912	2.67288	2.71907				2.3713	4.57524	3.98344	4.14375
P11498	Pyruvate carboxylase, mitochondrial	PC	7.06506e+07	6.83265e+07	6.69707e+07	84161106	1.00493e+08	6.36172e+07	4.85995e+07	5.45821e+07	4.76343e+07	5.07059e+07	3.06232e+07	4.67968e+07	12		26.0742	26.0259	25.997	26.3267	26.5825	25.9229	25.5344	25.7019	25.5055	25.5957	24.8681	25.4799		3.29587	2.9944	2.7965	3.2267	3.61222	2.79109	3.25119	3.03383	3.1747	3.14229	2.94015	3.03832	3.10811				3.76235	3.47065	3.29636	3.76894
P19338	Nucleolin	NCL	2.73617e+08	3.38032e+08	3.46389e+08	3.2188e+08	3.64543e+08	2.97e+08	1.64111e+08	2.36859e+08	1.45505e+08	1.82593e+08	9.42838e+07	1.25346e+08	12		28.0276	28.3326	28.3678	28.2619	28.4415	28.1459	27.2901	27.8195	27.1165	27.4441	26.4905	26.9013		5.24925	5.30104	5.1673	5.162	5.47122	5.01407	5.00685	5.15136	4.78569	4.99069	4.56254	4.45976	5.02681				5.99221	6.14416	6.09092	6.02946
Q7KZF4	Staphylococcal nuclease domain-containing protein 1	SND1	147190381	1.0865e+08	4.71545e+07	5.86135e+07	1.28795e+08	5.62556e+07	5.59121e+07	8.92164e+07	7.16245e+07	8.70316e+07	6.69916e+07	1.06876e+08	12		27.1331	26.6951	25.4909	25.8047	26.9405	25.7455	25.7367	26.4108	26.094	26.375	25.9975	26.6714		4.35478	3.66357	2.29037	2.70478	3.97021	2.61367	3.45341	3.74272	3.76315	3.92167	4.06951	4.22977	3.5648				4.97114	4.24625	2.69976	3.15931
P33176	Kinesin-1 heavy chain	KIF5B	2.31274e+07	3.09861e+07	4.23417e+07	36321262	3.89538e+07	3.45449e+07	2.6671e+07	2.05743e+07	3.56684e+07	4.53013e+07	2.39969e+07	4.22561e+07	12		24.4631	24.8851	25.3356	25.1143	25.2153	25.042	24.6688	24.2943	25.0881	25.433	24.5163	25.3327		1.68477	1.85358	2.13505	2.01436	2.24497	1.91015	2.38552	1.62625	2.75734	2.97968	2.58837	2.89107	2.25593				1.92322	2.14839	2.51668	2.35287
Q9NR30	Nucleolar RNA helicase 2	DDX21	9.83684e+07	8.8181e+07	8.78156e+07	8.79845e+07	6.21096e+07	9.21929e+07	2.48034e+07	8.03493e+07	6.96335e+07	8.46634e+07	3.37248e+07	7.90839e+07	12		26.5517	26.394	26.388	26.3907	25.8883	26.4582	24.564	26.2598	26.0533	26.3352	25.0073	26.2369		3.77336	3.36242	3.18745	3.2908	2.91802	3.32633	2.28079	3.59169	3.72248	3.88187	3.07934	3.7953	3.35082				4.30743	3.89721	3.75719	3.8438
Q9Y4L1	Hypoxia up-regulated protein 1	HYOU1	7.14672e+07	1.00944e+08	1.47223e+08	1.05131e+08	1.34833e+08	1.08585e+08	5.99562e+07	7.34409e+07	7.40836e+07	8.0923e+07	6.94541e+07	8.1761e+07	12		26.0908	26.589	27.1334	26.6476	27.0066	26.6943	25.8374	26.1301	26.1427	26.27	26.0496	26.2849		3.31245	3.55744	3.9329	3.54766	4.03631	3.56243	3.55416	3.46199	3.81185	3.81668	4.12159	3.84333	3.71323				3.78128	4.12325	4.63589	4.14383
Q9P2J5	Leucine--tRNA ligase, cytoplasmic	LARS	1.91497e+07	3.40131e+07	3.28781e+07	3.35022e+07	2.91517e+07	2.67064e+07	2.60567e+07	1.94981e+07	1.95318e+07	2.40519e+07	2.25241e+07	1.83568e+07	12		24.1908	25.0196	24.9706	24.9978	24.7971	24.6707	24.6352	24.2168	24.2193	24.5196	24.425	24.1298		1.41248	1.98805	1.7701	1.89781	1.82678	1.53886	2.35191	1.54874	1.88852	2.06628	2.497	1.68823	1.8729				1.6124	2.30424	2.0865	2.21673
P0C0L5	Complement C4-B	C4B	5.5734e+07	2.19212e+07	3.2656e+07	2.68097e+07	4.72406e+07	3.05112e+07	8704701	3.07269e+07	2.01914e+07	1.70616e+07	8.2569e+06	2.23601e+07	12		25.7321	24.3858	24.9608	24.6763	25.4935	24.8628	23.0534	24.873	24.2672	24.0243	22.9772	24.4144		2.95372	1.35428	1.76032	1.5763	2.52323	1.73102	0.770119	2.20491	1.93644	1.57089	1.0492	1.97284	1.78361				3.37178	1.56968	2.07497	1.8412
Q08211	ATP-dependent RNA helicase A	DHX9	9.92628e+07	1.00843e+08	1.259e+08	1.36863e+08	6.56163e+07	1.25053e+08	6.36761e+07	9.60597e+07	7.94873e+07	90612338	5.2824e+07	8.06063e+07	12		26.5647	26.5875	26.9077	27.0282	25.9676	26.898	25.9242	26.5174	26.2442	26.4332	25.6547	26.2644		3.78642	3.556	3.70718	3.92821	2.99726	3.76614	3.641	3.84934	3.91342	3.97984	3.72672	3.8228	3.72286				4.32234	4.12157	4.36982	4.58834
P0C0L4	Complement C4-A	C4A	1.3555e+06	4.78386e+06	2.88741e+06	3.82211e+06		6.85968e+06	958831	1.79377e+06	540480	472039	274285		10		20.3704	22.1897	21.4613	21.8659		22.7097	19.8709	20.7746	19.0439	18.8485	18.0653			-2.40794	-0.841795	-1.73918	-1.23401		-0.422111	-2.41233	-1.89353	-3.28692	-3.60482	-3.86265		-2.17053				-2.74876	-0.975681	-2.05005	-1.44138
Q04828	Aldo-keto reductase family 1 member C1	AKR1C1	7.45661e+08	8.64585e+08	7.62917e+08	8.72863e+08	7.41593e+08	8.2477e+08	4.36772e+08	6.99146e+08	3.76824e+08	4.30863e+08	3.55461e+08	4.911e+08	12		29.4739	29.6874	29.507	29.7012	29.4661	29.6194	28.7023	29.381	28.4893	28.6827	28.4051	28.8714		6.69561	6.65589	6.30643	6.60123	6.49576	6.4876	6.41906	6.71293	6.15851	6.22929	6.47714	6.42986	6.47244				7.64329	7.7145	7.43367	7.71054
P49588	Alanine--tRNA ligase, cytoplasmic	AARS	5.95967e+07	6.44317e+07	5.83002e+07	8.35224e+07	8.12673e+07	8.16641e+07	2.6744e+07	4.85715e+07	31267565	4.16399e+07	2.09087e+07	43448681	12		25.8287	25.9413	25.797	26.3157	26.2762	26.2832	24.6727	25.5336	24.8982	25.3115	24.3176	25.3728		3.0504	2.90973	2.59647	3.21571	3.30588	3.15138	2.38947	2.86552	2.56736	2.8581	2.38963	2.93122	2.85257				3.48214	3.37251	3.06058	3.7561
Q00341	Vigilin	HDLBP	1.73618e+07	1.7879e+07	1.16238e+07	1.38547e+07	19712503	1.72183e+07	1.38797e+08	1.47654e+07	1.18647e+07	1.2884e+07	1.02736e+08	1.30862e+07	12		24.0494	24.0918	23.4706	23.7239	24.2326	24.0374	27.0484	23.8157	23.5002	23.6191	26.6144	23.6415		1.27108	1.06022	0.270051	0.623922	1.26231	0.905617	4.76516	1.14763	1.16936	1.16572	4.68639	1.19996	1.62729				1.45099	1.22885	0.318321	0.72877
P04843	Dolichyl-diphosphooligosaccharide--protein glycosyltransferase subunit 1	RPN1	1.45952e+08	1.37098e+08	1.20767e+08	1.42801e+08	149729930	1.47346e+08	1.80212e+08	1.4015e+08	97199774	1.32567e+08	1.69338e+08	1.25633e+08	12		27.1209	27.0306	26.8477	27.0894	27.1578	27.1346	27.4251	27.0624	26.5344	26.9822	27.3353	26.9046		4.34258	3.99909	3.64713	3.98948	4.18749	4.00281	5.14188	4.39431	4.20365	4.52879	5.40736	4.46306	4.35897				4.95722	4.63513	4.29904	4.6599
P30101	Protein disulfide-isomerase A3	PDIA3	3.71294e+08	4.61933e+08	4.88253e+08	4.36113e+08	4.34073e+08	4.11926e+08	2.69951e+08	3.7388e+08	3.0983e+08	3.23799e+08	2.07893e+08	3.09158e+08	12		28.468	28.7831	28.8631	28.7001	28.6934	28.6178	28.0081	28.478	28.2069	28.2705	27.6313	28.2038		5.68965	5.75157	5.66253	5.60018	5.72307	5.48599	5.72488	5.80991	5.8761	5.81716	5.7033	5.76219	5.71721				6.49495	6.66634	6.67468	6.54127
P53618	Coatomer subunit beta	COPB1	5.71733e+07	1.12046e+08	1.52187e+08	8.42825e+07	6.42442e+07	8.60392e+07	4.04862e+07	7.85728e+07	7.56524e+07	8.92316e+07	7.75642e+07	9.95784e+07	12		25.7688	26.7395	27.1813	26.3287	25.9371	26.3585	25.2709	26.2275	26.1729	26.4111	26.2089	26.5693		2.99051	3.70798	3.98075	3.22878	2.96677	3.22667	2.98768	3.55944	3.84208	3.95769	4.28092	4.12774	3.57142				3.41377	4.29772	4.69229	3.77137
P06748	Nucleophosmin	NPM1	3.26909e+08	4.01345e+08	3.84675e+08	4.93738e+08	4.29695e+08	5.16866e+08	2.88611e+08	3.39858e+08	3.80576e+08	3.29834e+08	1.8425e+08	2.81984e+08	12		28.2843	28.5803	28.5191	28.8792	28.6787	28.9452	28.1046	28.3404	28.5036	28.2972	27.4571	28.071		5.50598	5.54873	5.31854	5.77922	5.70844	5.81339	5.82131	5.67227	6.17281	5.8438	5.52912	5.62946	5.69526				6.28528	6.43124	6.2692	6.7504
Q07065	Cytoskeleton-associated protein 4	CKAP4	7.94531e+07	9.86866e+07	9.34003e+07	4.45591e+07	4.84729e+07	3.86583e+07	2.13468e+07	8.21426e+07	7.54461e+07	8.85676e+07	2.8642e+07	1.21657e+08	12		26.2436	26.5564	26.4769	25.4092	25.5307	25.2043	24.3475	26.2916	26.1689	26.4003	24.7716	26.8582		3.46527	3.52481	3.2764	2.30927	2.56038	2.07245	2.06427	3.62354	3.83814	3.94691	2.84366	4.41666	3.16181				3.95573	4.08542	3.86204	2.69733
P31948	Stress-induced-phosphoprotein 1	STIP1	110511483	1.02087e+08	1.35526e+08	1.40643e+08	1.29926e+08	1.41585e+08	5.55611e+07	1.00284e+08	60249921	7.06938e+07	2.59608e+07	4.00014e+07	12		26.7196	26.6052	27.014	27.0675	26.9531	27.0771	25.7276	26.5795	25.8445	26.0751	24.6298	25.2535		3.94129	3.57369	3.81347	3.96752	3.98282	3.94528	3.44433	3.91143	3.51365	3.62171	2.70186	2.81196	3.60242				4.49913	4.14207	4.49511	4.63424
P78371	T-complex protein 1 subunit beta	CCT2	7.06982e+07	8.74145e+07	9.28657e+07	8.63019e+07	8.82724e+07	6.89441e+07	1.13407e+08	5.97981e+07	1.08863e+08	1.21621e+08	7.96137e+07	1.9191e+08	12		26.0752	26.3814	26.4686	26.3629	26.3955	26.0389	26.7569	25.8336	26.6979	26.8578	26.2465	27.5159		3.29684	3.34983	3.26812	3.26294	3.42517	2.9071	4.47369	3.16551	4.36714	4.40445	4.31854	5.07427	3.77613				3.76346	3.88261	3.85228	3.81127
Q9NYU2	UDP-glucose:glycoprotein glucosyltransferase 1	UGGT1	2.68689e+07	8.29677e+07	9.80782e+07	9.45822e+07	84425075	5.57402e+07	6.93806e+06	6351882	9.67117e+06	9626958	7.47939e+06	21228154	12		24.6794	26.306	26.5474	26.4951	26.3312	25.7322	22.7261	22.5988	23.2053	23.1986	22.8345	24.3395		1.9011	3.27451	3.3469	3.39512	3.36087	2.60039	0.442857	-0.0693365	0.874457	0.745282	0.906519	1.89789	1.88971				2.17018	3.79531	3.94515	3.96565
P52272	Heterogeneous nuclear ribonucleoprotein M	HNRNPM	1.73469e+08	2.09622e+08	2.53021e+08	2.14187e+08	2.45517e+08	2.33281e+08	9.41208e+07	1.38805e+08	1.19911e+08	1.31352e+08	9.83538e+07	1.53519e+08	12		27.3701	27.6432	27.9147	27.6743	27.8712	27.7975	26.488	27.0485	26.8374	26.9689	26.5515	27.1938		4.59177	4.61168	4.71416	4.57435	4.90095	4.66567	4.20477	4.38039	4.50659	4.51549	4.62351	4.75226	4.5868				5.24167	5.34515	5.55679	5.34305
O60488	Long-chain-fatty-acid--CoA ligase 4	ACSL4	7.40908e+07	8.6001e+07	2.17663e+08	92438824	9.66325e+07	9.07227e+07	8.48394e+07	9.3973e+07	1.0841e+08	1.23885e+08	8.78833e+07	1.17653e+08	12		26.1428	26.3579	27.6975	26.462	26.526	26.435	26.3382	26.4857	26.6919	26.8844	26.3891	26.81		3.36446	3.32631	4.497	3.36205	3.55571	3.30314	4.05499	3.81765	4.36113	4.43106	4.46112	4.36838	3.90858				3.84066	3.85535	5.30081	3.92703
Q06210	Glutamine--fructose-6-phosphate aminotransferase [isomerizing] 1	GFPT1	6.13827e+07	9.25964e+07	8.2989e+07	8.94706e+07	6.38036e+07	1.11239e+08	3.91788e+07	5.01259e+07	5.00673e+07	54817898	3.13363e+07	7.13177e+07	12		25.8713	26.4645	26.3064	26.4149	25.9271	26.7291	25.2236	25.5791	25.5774	25.7081	24.9013	26.0878		3.093	3.43291	3.10589	3.31496	2.95684	3.59726	2.94032	2.91096	3.24656	3.25478	2.97336	3.64617	3.20609				3.53077	3.97891	3.66106	3.87203
P50395	Rab GDP dissociation inhibitor beta	GDI2	8.16499e+07	1.18613e+08	1.17302e+08	1.10304e+08	1.09847e+08	127755358	5.73732e+07	7.43328e+07	2.83103e+07	2.34904e+07	9.74124e+06	1.16918e+07	12		26.2829	26.8217	26.8056	26.7169	26.7109	26.9288	25.7739	26.1475	24.7548	24.4856	23.2157	23.479		3.50462	3.79015	3.60512	3.61696	3.74063	3.79699	3.49063	3.47941	2.42402	2.0322	1.2877	1.03741	2.98382				4.00065	4.39297	4.24952	4.22478
P48643	T-complex protein 1 subunit epsilon	CCT5	6.71071e+07	1.43931e+08	6.77706e+07	5.925e+07	6.12832e+06	5.75626e+07	7.67651e+07	8.39982e+07	1.00753e+08	9.93479e+07	3.48327e+07	3.42842e+07	12		26	27.1008	26.0142	25.8203	22.5471	25.7786	26.1939	26.3239	26.5863	26.566	25.0539	25.031		3.22163	4.06927	2.81363	2.72036	-0.423235	2.64681	3.9107	3.65577	4.25545	4.11262	3.12597	2.58946	3.0582				3.67761	4.71647	3.31656	3.17751
P06576	ATP synthase subunit beta, mitochondrial	ATP5F1B	3.62876e+08	3.90541e+08	4.71081e+08	4.12964e+08	4.97971e+08	3.9173e+08	2.07049e+08	2.38571e+08	2.5397e+08	2.71739e+08	2.33343e+08	2.59672e+08	12		28.4349	28.5409	28.8114	28.6214	28.8915	28.5453	27.6254	27.8298	27.9201	28.0176	27.7979	27.9521		5.65657	5.50936	5.61088	5.52149	5.92119	5.41346	5.34215	5.16176	5.58928	5.56428	5.86991	5.51053	5.55591				6.45718	6.38561	6.61379	6.44936
P20700	Lamin-B1	LMNB1	6.44857e+07	7.72067e+07	8.62147e+07	7.4228e+07	9.46172e+07	7.87135e+07	5.1293e+07	5.20403e+07	5.11928e+07	5.40715e+07	3.30233e+07	4.59462e+07	12		25.9425	26.2022	26.3614	26.1455	26.4956	26.2301	25.6123	25.6331	25.6094	25.6884	24.977	25.4534		3.16414	3.17068	3.16091	3.04551	3.52531	3.09829	3.32901	2.96504	3.27863	3.235	3.04901	3.01186	3.16945				3.61199	3.67497	3.7259	3.5573
Q16891	MICOS complex subunit MIC60	IMMT	4.16599e+07	5.44294e+07	4.40315e+07	5.74657e+07	5.39791e+07	4.01486e+07	3.04228e+07	4.64846e+07	3.97658e+07	46585705	3.09431e+07	4.23208e+07	12		25.3122	25.6979	25.392	25.7762	25.6859	25.2588	24.8587	25.4702	25.245	25.4734	24.8831	25.3349		2.53383	2.66634	2.19151	2.67625	2.7156	2.12702	2.57541	2.80216	2.91422	3.02002	2.95514	2.89328	2.67257				2.89246	3.09042	2.58323	3.12598
P55157	Microsomal triglyceride transfer protein large subunit	MTTP	1.37234e+08	7.11629e+07	7.64976e+07	7.01747e+07	1.84791e+08	7.18347e+07	3.68409e+07	1.20648e+08	7.04979e+07	8.62823e+07	4.29248e+07	9.29367e+07	12		27.0321	26.0846	26.1889	26.0644	27.4613	26.0982	25.1348	26.8462	26.0711	26.3626	25.3553	26.4697		4.25373	3.05308	2.98839	2.9645	4.49103	2.96636	2.85156	4.17814	3.74027	3.9092	3.42734	4.02816	3.57098				4.85579	3.53867	3.52255	3.46267
Q86UP2	Kinectin	KTN1	41911348	3.75526e+07	3.44396e+07	3.32172e+07	3.58915e+07	3.06358e+07	3.56001e+07	3.65686e+07	4.18184e+07	5.11817e+07	2.91484e+07	4.76814e+07	12		25.3208	25.1624	25.0376	24.9854	25.0971	24.8687	25.0854	25.1241	25.3176	25.6091	24.7969	25.5069		2.54251	2.13087	1.83704	1.88548	2.12685	1.73689	2.80213	2.45601	2.98683	3.15576	2.86894	3.06534	2.46622				2.90236	2.46978	2.1654	2.20233
P54136	Arginine--tRNA ligase, cytoplasmic	RARS	1.2661e+08	1.36308e+08	1.37232e+08	1.41574e+08	1.4347e+08	1.33579e+08	2.61093e+07	1.13752e+08	2.12015e+07	3.11614e+07	2.74256e+07	2.91962e+07	12		26.9158	27.0223	27.032	27.077	27.0962	26.9931	24.6381	26.7613	24.3377	24.8933	24.709	24.7993		4.13748	3.99075	3.83152	3.97703	4.12588	3.86129	2.35482	4.09322	2.00686	2.43989	2.78105	2.35769	3.32979				4.72309	4.62547	4.51639	4.64536
P31939	Bifunctional purine biosynthesis protein PURH	ATIC	1.36461e+08	1.68459e+08	1.93283e+08	1.67713e+08	1.54013e+08	144754117	102288252	1.20344e+08	7.47496e+07	9.5878e+07	7.27003e+07	8.90661e+07	12		27.0239	27.3278	27.5261	27.3214	27.1985	27.109	26.6081	26.8426	26.1556	26.5147	26.1155	26.4084		4.24558	4.29629	4.32562	4.22147	4.22819	3.97721	4.32482	4.1745	3.82476	4.06133	4.18749	3.96679	4.15284				4.84649	4.9796	5.0988	4.93088
Q14690	Protein RRP5 homolog	PDCD11	8.24625e+06	3.08129e+07	4.84655e+07	6.10677e+07	1.92027e+07	7.15036e+07	3.22462e+07	7.01647e+06	1.76757e+07	1.99962e+07	3.26149e+07	4.79366e+06	12		22.9753	24.877	25.5305	25.8639	24.1948	26.0915	24.9426	22.7423	24.0753	24.2532	24.959	22.1927		0.196975	1.84549	2.32993	2.76396	1.22451	2.95969	2.65938	0.0742248	1.74446	1.79986	3.03106	-0.248888	1.69839				0.224855	2.13901	2.74639	3.22843
P25705	ATP synthase subunit alpha, mitochondrial	ATP5F1A	2.55581e+08	3.70488e+08	3.77847e+08	3.61686e+08	3.67415e+08	3.91881e+08	1.75992e+08	2.7092e+08	2.18231e+08	2.36956e+08	1.63446e+08	1.98624e+08	12		27.9292	28.4649	28.4932	28.4302	28.4528	28.5458	27.3909	28.0133	27.7013	27.82	27.2842	27.5655		5.15087	5.43331	5.2927	5.33021	5.48254	5.41402	5.10769	5.3452	5.37048	5.36668	5.35627	5.12388	5.31449				5.87991	6.29747	6.23875	6.22594
Q9BQE3	Tubulin alpha-1C chain	TUBA1C	5.65471e+08	7.42965e+08	1.08442e+09	8.03876e+08	9.75022e+08	8.21101e+08	4.56429e+08	5.66016e+08	5.91521e+08	5.52598e+08	5.40472e+08	5.68009e+08	12		29.0749	29.4687	30.0143	29.5824	29.8609	29.613	28.7658	29.0763	29.1399	29.0417	29.0096	29.0813		6.29654	6.43718	6.81375	6.48245	6.89057	6.48116	6.48257	6.40818	6.80905	6.58829	7.08167	6.63975	6.6176				7.18774	7.46099	8.03167	7.5718
Q14697	Neutral alpha-glucosidase AB	GANAB	1.15206e+08	1.42358e+08	1.51969e+08	1.66513e+08	1.25314e+08	1.34058e+08	5.52744e+07	9.47747e+07	94610739	8.60455e+07	3.54178e+07	1.14637e+08	12		26.7796	27.0849	27.1792	27.3111	26.901	26.9983	25.7201	26.498	26.4955	26.3586	25.078	26.7725		4.00131	4.05341	3.97868	4.21111	3.93068	3.86646	3.43686	3.82991	4.1647	3.90523	3.15	4.33091	3.90494				4.56765	4.69809	4.68984	4.91877
Q9BQG0	Myb-binding protein 1A	MYBBP1A	34700574	2.48225e+07	3.27487e+07	24990929	2.21793e+07	3.04118e+07	1.14678e+07	2.23372e+07	9.52071e+06	1.1231e+07	9.86212e+06	1.9792e+07	12		25.0485	24.5651	24.9649	24.5749	24.4027	24.8581	23.4511	24.4129	23.1826	23.421	23.2335	24.2384		2.27012	1.5336	1.76441	1.47495	1.43242	1.72631	1.16785	1.74486	0.851835	0.967618	1.3055	1.79683	1.50303				2.59143	1.77752	2.07979	1.72281
P12956	X-ray repair cross-complementing protein 6	XRCC6	1.47411e+08	2.12545e+08	208326277	2.17841e+08	2.10962e+08	2.10118e+08	1.15376e+08	1.47302e+08	134100125	1.38908e+08	1.06013e+08	1.46719e+08	12		27.1353	27.6632	27.6343	27.6987	27.6524	27.6466	26.7818	27.1342	26.9987	27.0495	26.6597	27.1285		4.35693	4.63165	4.43375	4.59875	4.68211	4.5148	4.49853	4.46611	4.66793	4.59618	4.7317	4.6869	4.57211				4.9736	5.36831	5.22626	5.37155
P13010	X-ray repair cross-complementing protein 5	XRCC5	1.8725e+08	1.59926e+08	1.46704e+08	1.48113e+08	1.10834e+08	1.24717e+08	7.9298e+07	1.49227e+08	6.93658e+07	1.02618e+08	8.98047e+07	1.46719e+08	12		27.4804	27.2528	27.1283	27.1421	26.7238	26.8941	26.2408	27.1529	26.0477	26.6127	26.4203	27.1285		4.70206	4.22129	3.9278	4.04218	3.75353	3.76226	3.95754	4.48484	3.71692	4.15934	4.49232	4.6869	4.15891				5.36757	4.89267	4.62988	4.72145
P24752	Acetyl-CoA acetyltransferase, mitochondrial	ACAT1	6.03241e+07	7.00353e+07	8.93513e+07	7.65597e+07	6.79168e+07	5.92346e+07	3.37914e+07	5.69388e+07	4.64011e+07	4.87301e+07	3.19645e+07	38401998	12		25.8462	26.0616	26.413	26.1901	26.0173	25.8199	25.0102	25.7629	25.4677	25.5383	24.93	25.1947		3.0679	3.03004	3.21246	3.09014	3.04697	2.68811	2.72691	3.09482	3.13685	3.08494	3.002	2.75309	2.99452				3.50212	3.51196	3.78667	3.60942
P14866	Heterogeneous nuclear ribonucleoprotein L	HNRNPL	2.32002e+08	2.60374e+08	2.61932e+08	2.73275e+08	2.8891e+08	3.03357e+08	8.0878e+07	1.9401e+08	1.3647e+08	1.36613e+08	8.52949e+07	1.48464e+08	12		27.7896	27.956	27.9646	28.0258	28.106	28.1764	26.2692	27.5316	27.024	27.0255	26.346	27.1455		5.01123	4.92447	4.7641	4.92583	5.13575	5.04462	3.986	4.86346	4.6932	4.57215	4.41799	4.70395	4.75356				5.72051	5.7077	5.61565	5.7536
P35606	Coatomer subunit beta'	COPB2	5.74215e+07	4.82425e+07	5.40409e+07	6.04282e+07	2.33127e+07	5.9919e+07	2.03114e+07	4.32759e+07	6.32694e+07	5.19314e+07	1.79422e+07	7.98739e+07	12		25.7751	25.5238	25.6875	25.8487	24.4746	25.8365	24.2758	25.3671	25.915	25.6301	24.0969	26.2512		2.99676	2.49226	2.48703	2.74877	1.50432	2.70469	1.99254	2.69897	3.5842	3.17674	2.16889	3.80964	2.69707				3.42091	2.88865	2.93157	3.21069
P02786	Transferrin receptor protein 1	TFRC	3.8426e+07	1.95032e+08	2.6474e+08	1.59277e+08	5.87093e+07	2.19176e+08	1.90601e+07	2.43725e+07	2.28366e+07	2.4905e+07	2.17221e+07	2.95676e+07	12		25.1956	27.5391	27.98	27.247	25.8071	27.7075	24.1841	24.5388	24.4448	24.5699	24.3727	24.8175		2.41725	4.5076	4.77947	4.14701	2.83679	4.57569	1.90081	1.87066	2.11404	2.11657	2.44469	2.37593	3.00721				2.75938	5.22452	5.63378	4.8439
Q13085	Acetyl-CoA carboxylase 1	ACACA	3.305e+07	1.46052e+07	1.68851e+07	1.33463e+07	4.2268e+07	1.32292e+07	2.13425e+07	26235413	3.7442e+07	5.2152e+07	2.96559e+07	87765827	12		24.9781	23.8	24.0092	23.6699	25.3331	23.6572	24.3472	24.645	25.1582	25.6362	24.8218	26.3872		2.19981	0.768441	0.808722	0.569985	2.36277	0.525402	2.06398	1.97692	2.82735	3.18285	2.89385	3.94557	2.01047				2.51117	0.890659	0.953277	0.665768
P11586	C-1-tetrahydrofolate synthase, cytoplasmic	MTHFD1	2.96428e+07	6.56699e+07	6.61815e+07	6.81411e+07	40443543	6.02396e+07	2.48738e+07	21291532	2.04944e+07	2.56596e+07	2.10713e+07	2.92849e+07	12		24.8212	25.9687	25.9799	26.022	25.2694	25.8442	24.5681	24.3438	24.2887	24.613	24.3288	24.8037		2.04285	2.93719	2.7794	2.92207	2.29911	2.71239	2.28488	1.67569	1.95793	2.15963	2.40081	2.36207	2.37783				2.33198	3.40434	3.27621	3.41312
P00558	Phosphoglycerate kinase 1	PGK1	3.80824e+08	3.72097e+08	3.76143e+08	4.35039e+08	4.17225e+08	4.12634e+08	1.87173e+08	2.83576e+08	1.55889e+08	1.62137e+08	4.87642e+07	1.29178e+08	12		28.5046	28.4711	28.4867	28.6966	28.6362	28.6203	27.4798	28.0792	27.2159	27.2726	25.5393	26.9448		5.72622	5.43956	5.28618	5.59662	5.66596	5.48846	5.19655	5.41107	4.88514	4.81927	3.61135	4.5032	5.1358				6.53669	6.30471	6.23106	6.53711
P27824	Calnexin	CANX	1.47282e+08	2.55227e+08	2.89517e+08	224283654	2.94694e+08	2.64656e+08	8.99509e+07	1.39151e+08	1.53148e+08	1.24715e+08	1.04834e+08	1.54572e+08	12		27.134	27.9272	28.1091	27.7407	28.1346	27.9795	26.4226	27.0521	27.1904	26.8941	26.6435	27.2037		4.35567	4.89566	4.90855	4.6408	5.16435	4.84772	4.13939	4.38398	4.85955	4.44069	4.71556	4.76212	4.67617				4.97216	5.67431	5.78593	5.42067
P34897	Serine hydroxymethyltransferase, mitochondrial	SHMT2	2.05054e+08	2.35086e+08	2.35749e+08	2.51523e+08	2.89138e+08	1.4716e+08	7.18926e+07	1.87832e+08	1.64551e+08	1.76346e+08	6.64026e+07	226966001	12		27.6114	27.8086	27.8127	27.9061	28.1072	27.1328	26.0993	27.4849	27.294	27.3938	25.9847	27.7579		4.83309	4.77707	4.61215	4.80617	5.13689	4.00099	3.81609	4.81678	4.96315	4.94047	4.05677	5.31632	4.67299				5.51716	5.53685	5.43655	5.61383
Q15020	Squamous cell carcinoma antigen recognized by T-cells 3	SART3	2.49131e+07	54668160	51063925	6.62587e+07	2.10685e+07	6.6529e+07	1.35573e+08	2.30362e+07	1.14415e+07	1.42076e+07	8.75549e+07	1.67167e+07	12		24.5704	25.7042	25.6058	25.9816	24.3286	25.9875	27.0145	24.4574	23.4478	23.7602	26.3837	23.9948		1.79207	2.67266	2.40528	2.88166	1.35829	2.85566	4.73125	1.78931	1.11697	1.30679	4.45572	1.55321	2.4099				2.04571	3.09774	2.83521	3.36591
P36776	Lon protease homolog, mitochondrial	LONP1	2.71661e+07	3.06295e+07	3.19092e+07	2.73277e+07	3.78109e+07	4.62413e+07	3.93348e+06	4.66934e+07	2.78567e+07	3.0409e+07	1.74728e+07	4.12938e+07	12		24.6953	24.8684	24.9275	24.7039	25.1723	25.4627	21.9074	25.4767	24.7315	24.858	24.0586	25.2994		1.91697	1.83688	1.72694	1.60391	2.20201	2.33086	-0.375872	2.80862	2.40072	2.40463	2.13064	2.85784	1.98701				2.18829	2.12903	2.03563	1.87344
P52789	Hexokinase-2	HK2	2.40249e+07	7.17908e+07	6.21928e+07	8.2874e+07	5.82506e+07	7.22514e+07	2.01646e+07	3.21974e+07	2.33284e+07	2.23893e+07	1.65577e+07	9.09539e+07	12		24.518	26.0973	25.8902	26.3044	25.7958	26.1065	24.2653	24.9404	24.4756	24.4163	23.981	26.4386		1.73969	3.06576	2.68972	3.20447	2.82547	2.9747	1.98207	2.27235	2.14478	1.96294	2.05303	3.99705	2.576				1.98592	3.55336	3.17049	3.74297
P22102	Trifunctional purine biosynthetic protein adenosine-3	GART	3.48434e+07	5.90639e+07	4.8514e+07	50908697	3.76908e+07	5.86637e+07	1.99101e+07	3.11749e+07	2.98516e+07	3.10207e+07	1.6139e+07	3.51042e+07	12		25.0544	25.8158	25.5319	25.6014	25.1677	25.806	24.247	24.8939	24.8313	24.8867	23.944	25.0651		2.27605	2.78423	2.33137	2.50146	2.19741	2.67414	1.96375	2.22579	2.5005	2.43336	2.01608	2.62356	2.37731				2.5982	3.22706	2.7481	2.92182
P09874	Poly [ADP-ribose] polymerase 1	PARP1	7.25046e+07	6.37275e+07	9.08449e+07	7.56878e+07	1.54757e+08	7.58773e+07	6.34828e+07	7.67726e+07	4.88753e+07	1.41262e+07	5.00827e+07	8.70612e+07	12		26.1116	25.9254	26.4369	26.1736	27.2054	26.1772	25.9199	26.1941	25.5426	23.7519	25.5778	26.3755		3.33324	2.89387	3.23638	3.07361	4.23514	3.04534	3.63662	3.526	3.2118	1.29851	3.64984	3.93394	3.25619				3.80501	3.35414	3.81487	3.59012
O00410	Importin-5	IPO5	2.35786e+07	3.88395e+07	7.61646e+07	3.68577e+07	1.49725e+07	3.56657e+07	9.69964e+06	2.14975e+07	8.64752e+06	9.94627e+06	5.58229e+06	8.35202e+06	12		24.491	25.211	26.1826	25.1355	23.8358	25.088	23.2095	24.3577	23.0439	23.2457	22.4124	22.9937		1.71264	2.17948	2.98209	2.03552	0.865522	1.95621	0.926255	1.68958	0.713053	0.792358	0.484457	0.552109	1.40744				1.95505	2.52612	3.51513	2.37758
P58107	Epiplakin	EPPK1	8.08476e+06	7.06027e+06	1.0338e+07	1.2353e+07	1.08068e+07	1.16037e+07	2.25156e+07	2.33855e+07	1.30685e+07	1.51875e+07	9.26677e+06	2.66126e+07	12		22.9468	22.7513	23.3015	23.5584	23.3654	23.4681	24.4244	24.4791	23.6396	23.8564	23.1436	24.6656		0.168442	-0.280248	0.100927	0.458415	0.395139	0.336262	2.14118	1.81102	1.30879	1.40302	1.21567	2.22402	0.940219				0.192282	-0.324821	0.118967	0.53545
P11216	Glycogen phosphorylase, brain form	PYGB	1.8677e+07	5.43701e+07	4.67387e+07	4.6896e+07	3.3764e+07	4.83467e+07	4.4189e+07	2.65934e+07	1.70523e+07	2.08892e+07	3.43347e+07	1.59059e+07	12		24.1548	25.6963	25.4781	25.483	25.009	25.5269	25.3972	24.6646	24.0235	24.3163	25.0332	23.9231		1.37643	2.66477	2.27759	2.38301	2.03869	2.39509	3.11394	1.99648	1.69266	1.86289	3.10519	1.48147	2.19902				1.57125	3.08859	2.6847	2.78347
Q9NZI8	Insulin-like growth factor 2 mRNA-binding protein 1	IGF2BP1	1.74526e+08	1.96927e+08	1.84967e+08	2.0209e+08	2.69838e+08	2.32043e+08	9.35563e+07	1.22419e+08	9.3303e+07	1.14597e+08	1.23023e+08	1.46491e+08	12		27.3789	27.5531	27.4627	27.5904	28.0075	27.7898	26.4793	26.8673	26.4754	26.772	26.8743	27.1262		4.60054	4.52154	4.26217	4.49048	5.03723	4.658	4.19609	4.19916	4.14462	4.31863	4.94638	4.68465	4.50496				5.25169	5.24068	5.02401	5.24508
P11717	Cation-independent mannose-6-phosphate receptor	IGF2R	1.99394e+07	6.00648e+07	8.54961e+07	9.49261e+07	5.97849e+07	1.23185e+08	5.32443e+06	1.32627e+07	3.98813e+06	3.30991e+06	2.95754e+06	9.46224e+06	12		24.2491	25.84	26.3494	26.5003	25.8333	26.8763	22.3442	23.6609	21.9273	21.6584	21.496	23.1738		1.47079	2.80848	3.14883	3.40035	2.86298	3.74443	0.0609513	0.992778	-0.403522	-0.795004	-0.432005	0.732166	1.46594				1.67896	3.25516	3.71167	3.97177
P09327	Villin-1	VIL1	8.91926e+07	1.06075e+08	1.10142e+08	1.26601e+08	1.27595e+08	1.091e+08	7.18655e+07	9.51447e+07	6.34012e+07	6.90558e+07	3.08611e+07	3.97496e+07	12		26.4104	26.6605	26.7148	26.9157	26.927	26.7011	26.0988	26.5036	25.918	26.0413	24.8793	25.2444		3.63209	3.62897	3.51427	3.81577	3.9567	3.56925	3.81555	3.83553	3.5872	3.58789	2.95132	2.80285	3.55812				4.14617	4.20615	4.14243	4.45699
Q92598	Heat shock protein 105 kDa	HSPH1	2.07322e+07	2.2091e+07	2.29116e+07	2.48093e+07	4.07006e+07	2.65223e+07	8.14694e+06	1.84351e+07	9924943	1.14547e+07	6.46681e+06	1.57245e+07	12		24.3054	24.397	24.4496	24.5644	25.2785	24.6607	22.9578	24.1359	23.2426	23.4494	22.6246	23.9065		1.52704	1.36541	1.24905	1.46443	2.30825	1.52888	0.674582	1.46786	0.911825	0.996067	0.696653	1.46492	1.30458				1.74317	1.58258	1.47231	1.71052
Q3LXA3	Triokinase/FMN cyclase	TKFC	8.64958e+07	1.09946e+08	1.20693e+08	1.16139e+08	1.28415e+08	1.40382e+08	4.82339e+07	8.10543e+07	3.62807e+07	4.52974e+07	2.38708e+07	2.09178e+07	12		26.3661	26.7122	26.8468	26.7913	26.9362	27.0648	25.5235	26.2724	25.1127	25.4329	24.5087	24.3182		3.58779	3.68068	3.64624	3.69133	3.96594	3.93296	3.2403	3.6043	2.7819	2.97956	2.58077	1.87665	3.29737				4.0956	4.26608	4.29799	4.31164
P05455	Lupus La protein	SSB	1.04824e+08	1.13706e+08	1.35396e+08	1.25423e+08	1.04373e+08	1.0536e+08	4.85833e+07	1.14691e+08	7.88175e+07	7.47109e+07	3.16678e+07	6.74078e+07	12		26.6434	26.7607	27.0126	26.9022	26.6372	26.6507	25.534	26.7732	26.232	26.1548	24.9165	26.0064		3.86506	3.7292	3.81209	3.80228	3.66687	3.51893	3.25071	4.10509	3.90121	3.70145	2.98854	3.56483	3.65885				4.41211	4.32232	4.49348	4.44124
P39023	60S ribosomal protein L3	RPL3	1.12151e+08	120289820	1.65047e+08	1.46006e+08	1.36556e+08	1.38634e+08	9.09336e+07	1.01862e+08	8.37604e+07	9.18809e+07	6.69714e+07	80617861	12		26.7409	26.8419	27.2983	27.1214	27.0249	27.0467	26.4383	26.602	26.3198	26.4533	25.997	26.2646		3.96253	3.8104	4.09777	4.0215	4.05463	3.91489	4.15507	3.93395	3.98896	3.9999	4.06907	3.82301	3.98597				4.52338	4.41643	4.83023	4.6973
P43243	Matrin-3	MATR3	8.20949e+07	1.09984e+08	1.163e+08	1.06863e+08	1.15887e+08	9.33766e+07	5.72521e+07	6.78075e+07	5.09013e+07	5.29875e+07	7.29194e+07	6.61021e+07	12		26.2908	26.7127	26.7933	26.6712	26.7881	26.4766	25.7708	26.0149	25.6012	25.6591	26.1198	25.9782		3.51246	3.68118	3.59275	3.57124	3.81785	3.34474	3.48758	3.34685	3.2704	3.20578	4.19183	3.53661	3.5466				4.0096	4.26666	4.23493	4.17137
O60841	Eukaryotic translation initiation factor 5B	EIF5B	4.5221e+07	2.86341e+07	1.9069e+07	2.47143e+07	3.42947e+07	2.11605e+07	1.79127e+07	4.11121e+07	4.33958e+07	3.42079e+07	2.06955e+07	4.03251e+07	12		25.4305	24.7712	24.1847	24.5588	25.0315	24.3349	24.0945	25.2931	25.3711	25.0278	24.3028	25.2652		2.65216	1.73969	0.984204	1.4589	2.06119	1.20305	1.81124	2.62497	3.04025	2.57446	2.37484	2.82359	2.11238				3.02754	2.01639	1.16013	1.70406
Q92900	Regulator of nonsense transcripts 1	UPF1	2.62745e+07	3.02438e+07	2.8206e+07	2.59375e+07	2.18006e+07	1.95666e+08	26121467	2.54887e+07	1.01396e+08	9.81003e+07	8.25118e+06	1.29735e+08	12		24.6472	24.8501	24.7495	24.6285	24.3779	27.5438	24.6387	24.6034	26.5954	26.5478	22.9762	26.951		1.86883	1.8186	1.54898	1.52859	1.40757	4.412	2.35549	1.93527	4.26463	4.09439	1.0482	4.50941	2.56599				2.13334	2.10784	1.82585	1.78546
O94979	Protein transport protein Sec31A	SEC31A	3.00051e+07	6.08177e+07	7.20309e+07	6.60447e+07	5.99681e+07	6.77384e+07	4.57925e+07	3.66111e+07	2.57182e+07	2.77681e+07	5.12031e+07	2.37319e+07	12		24.8387	25.858	26.1021	25.9769	25.8377	26.0135	25.4486	25.1258	24.6163	24.7269	25.6097	24.5003		2.06037	2.82645	2.90159	2.87699	2.8674	2.88165	3.16536	2.45769	2.28548	2.27356	3.68176	2.05874	2.69475				2.35199	3.27599	3.42023	3.36046
P41252	Isoleucine--tRNA ligase, cytoplasmic	IARS	2.99548e+07	3.68891e+07	4.37549e+07	3.98448e+07	3.54445e+07	4.19683e+07	2.48802e+07	3.01549e+07	25670728	3.11341e+07	2.44994e+07	2.704e+07	12		24.8363	25.1367	25.3829	25.2479	25.0791	25.3228	24.5685	24.8459	24.6136	24.892	24.5462	24.6886		2.05795	2.10515	2.18242	2.14794	2.10876	2.19098	2.28525	2.1778	2.28282	2.43863	2.61827	2.24701	2.23691				2.34923	2.43997	2.57251	2.50889
O75874	Isocitrate dehydrogenase [NADP] cytoplasmic	IDH1	1.45132e+08	167309716	2.19239e+08	1.87581e+08	1.88675e+08	1.75305e+08	9.98736e+07	155993456	7.70775e+07	7.96147e+07	32803574	4.25481e+07	12		27.1128	27.3179	27.7079	27.4829	27.4913	27.3853	26.5736	27.2169	26.1998	26.2465	24.9673	25.3426		4.33446	4.28641	4.50741	4.38299	4.52103	4.25347	4.29036	4.54882	3.869	3.79317	3.03938	2.90101	4.06063				4.94794	4.96815	5.31308	5.11954
P53396	ATP-citrate synthase	ACLY	1.07743e+08	1.30731e+08	1.66265e+08	1.52337e+08	8.19067e+07	1.43052e+08	4.78494e+07	1.08617e+08	4.09574e+07	8.73661e+07	2.53607e+07	6.67931e+07	12		26.683	26.962	27.3089	27.1827	26.2875	27.092	25.512	26.6947	25.2876	26.3806	24.5961	25.9932		3.90468	3.93049	4.10838	4.08274	3.31718	3.96014	3.22875	4.02659	2.95682	3.9272	2.66812	3.55161	3.63856				4.45734	4.55562	4.84274	4.76883
P47897	Glutamine--tRNA ligase	QARS	5.24314e+07	5.68753e+07	6.87737e+07	6.37408e+07	5.69122e+07	6.17676e+07	6.64364e+06	4.53364e+07	1.73245e+07	1.66343e+07	6.76676e+06	1.57572e+07	12		25.6439	25.7613	26.0354	25.9257	25.7622	25.8803	22.6635	25.4342	24.0463	23.9877	22.69	23.9095		2.8656	2.72976	2.83483	2.82577	2.79194	2.74853	0.380298	2.76608	1.71551	1.53429	0.762064	1.46793	2.11855				3.27118	3.16392	3.34154	3.30062
P22314	Ubiquitin-like modifier-activating enzyme 1	UBA1	7.7779e+07	1.11281e+08	1.48089e+08	1.53048e+08	1.39213e+08	139939361	5.69778e+07	9.67021e+07	5.46142e+07	5.60286e+07	4.87877e+07	8.97428e+07	12		26.2129	26.7296	27.1419	27.1894	27.0527	27.0602	25.7639	26.527	25.7028	25.7397	25.54	26.4193		3.43455	3.69809	3.94136	4.08946	4.08242	3.92841	3.48065	3.85896	3.37197	3.28629	3.61204	3.97771	3.73016				3.92066	4.28626	4.64586	4.77668
Q13200	26S proteasome non-ATPase regulatory subunit 2	PSMD2	2.74432e+07	4.90537e+07	5.69835e+07	5.96493e+07	5.45549e+07	7.83878e+07	6.02925e+07	3.60127e+07	2.07684e+07	9.7786e+07	5.40822e+07	19169225	12		24.7099	25.5479	25.764	25.83	25.7012	26.2241	25.8455	25.102	24.3079	26.5431	25.6887	24.1923		1.93161	2.51632	2.56352	2.73005	2.73091	3.0923	3.56223	2.43391	1.97709	4.08976	3.76068	1.7507	2.76159				2.20501	2.91653	3.02173	3.18883
P52895	Aldo-keto reductase family 1 member C2	AKR1C2	6.36034e+07	8.69363e+07	7.30106e+07	1.12251e+08	7.96201e+07	7.07318e+07	4.77653e+07	7.4356e+07	4.46752e+07	3.43979e+07	3.83905e+07	4.16295e+07	12		25.9226	26.3735	26.1216	26.7421	26.2466	26.0759	25.5095	26.1479	25.413	25.0358	25.1942	25.3111		3.14427	3.34192	2.92108	3.6422	3.27634	2.94403	3.22622	3.47986	3.08217	2.58245	3.26628	2.86952	3.14803				3.5893	3.87344	3.44321	4.25426
Q02952	A-kinase anchor protein 12	AKAP12	1.47833e+07	7.90934e+06	2.0944e+08	9.48047e+06	1.0929e+07	4.17877e+06	1.18238e+07	1.42234e+07	3.28116e+07	3.83202e+06	8.24726e+06	1.07568e+07	12		23.8175	22.9151	27.642	23.1765	23.3817	21.9946	23.4952	23.7618	24.9677	21.8697	22.9755	23.3588		1.03913	-0.116414	4.44144	0.0765804	0.411364	-1.13717	1.21194	1.09368	2.6369	-0.583694	1.04751	0.917168	0.91987				1.18621	-0.134929	5.23532	0.0894494
P50990	T-complex protein 1 subunit theta	CCT8	89919563	116387616	9.51213e+07	1.24006e+08	2.08756e+08	1.93971e+08	6.42548e+07	1.25305e+08	47265684	5.34209e+07	4.1005e+07	6.01414e+07	12		26.4221	26.7944	26.5033	26.8858	27.6372	27.5313	25.9373	26.9009	25.4943	25.6709	25.2893	25.8419		3.6438	3.76282	3.30274	3.78589	4.66695	4.39944	3.65406	4.23278	3.16349	3.21754	3.36133	3.40027	3.71592				4.15953	4.36129	3.89309	4.42209
Q15075	Early endosome antigen 1	EEA1	2.68332e+07	3.77136e+07	8.78446e+06	7.76426e+06	25978846	2.1074e+07	1.77021e+07	2.05478e+07	2.61195e+07	2.32638e+07	1.33053e+07	1.48057e+07	12		24.6775	25.1686	23.0665	22.8884	24.6308	24.329	24.0774	24.2925	24.6386	24.4716	23.6655	23.8196		1.89918	2.13704	-0.134002	-0.211531	1.66054	1.19714	1.79418	1.62439	2.30782	2.01822	1.73753	1.37806	1.45071				2.16799	2.47693	-0.157954	-0.247078
P16435	NADPH--cytochrome P450 reductase	POR	7.54153e+07	9.90536e+07	1.12766e+08	6.82447e+07	1.02528e+08	6.34645e+07	2.08486e+07	5.44292e+07	8.40921e+07	9.62064e+07	30092684	8.83883e+07	12		26.1684	26.5617	26.7488	26.0242	26.6114	25.9194	24.3134	25.6979	26.3255	26.5196	24.8429	26.3974		3.39002	3.53017	3.54823	2.92427	3.64115	2.78763	2.0302	3.02979	3.99466	4.06626	2.91494	3.95577	3.31776				3.86984	4.09163	4.18246	3.41568
Q99832	T-complex protein 1 subunit eta	CCT7	9.08111e+07	1.30557e+08	1.30894e+08	1.43629e+08	1.07548e+08	1.13168e+08	6.35313e+07	8.14944e+07	4.41898e+07	4.91715e+07	4.55961e+07	5.36065e+07	12		26.4364	26.9601	26.9638	27.0978	26.6804	26.7539	25.921	26.2802	25.3972	25.5513	25.4424	25.6759		3.65803	3.92856	3.7633	3.99783	3.71011	3.62206	3.63772	3.61211	3.06641	3.09795	3.51444	3.23432	3.57024				4.17578	4.55339	4.43597	4.66965
P56192	Methionine--tRNA ligase, cytoplasmic	MARS	4.20453e+07	5.01063e+07	5.99162e+07	6.43197e+07	5.88024e+07	6.44082e+07	2.70001e+07	4.05699e+07	3.82071e+07	3.77736e+07	3.15884e+07	4.01182e+07	12		25.3254	25.5785	25.8364	25.9388	25.8094	25.9407	24.6865	25.2739	25.1873	25.1709	24.9129	25.2578		2.54711	2.54695	2.63592	2.83881	2.83908	2.80892	2.40322	2.60582	2.85654	2.71751	2.98492	2.81617	2.71675				2.90762	2.95203	3.10708	3.31586
P12268	Inosine-5'-monophosphate dehydrogenase 2	IMPDH2	6.0898e+07	8.10851e+07	8.16194e+07	7.59607e+07	7.14225e+07	57023284	6.50699e+07	6.46113e+07	4.48591e+07	4.5046e+07	5.69938e+07	3.23698e+07	12		25.8599	26.2729	26.2824	26.1787	26.0899	25.765	25.9555	25.9453	25.4189	25.4249	25.7643	24.9481		3.08156	3.24139	3.08188	3.0788	3.11958	2.63323	3.67224	3.27719	3.08809	2.97153	3.83633	2.50656	3.13237				3.51771	3.75693	3.63276	3.59618
Q99613	Eukaryotic translation initiation factor 3 subunit C	EIF3C	3.90388e+07	6.02944e+07	6.55764e+07	6.89565e+07	5.09812e+07	6.10458e+07	23372787	3.66327e+07	5.6339e+07	5.58846e+07	2.12484e+07	4.65009e+07	12		25.2184	25.8455	25.9667	26.0392	25.6035	25.8634	24.4783	25.1266	25.7476	25.7359	24.3408	25.4708		2.44007	2.81398	2.76615	2.93924	2.63317	2.73157	2.19508	2.45854	3.41683	3.28258	2.41288	3.02917	2.75994				2.78543	3.26154	3.26059	3.43316
P51659	Peroxisomal multifunctional enzyme type 2	HSD17B4	39187651	8.09834e+07	9.82302e+07	8.36378e+07	6.68126e+07	7.21894e+07	3.15123e+07	3.38236e+07	3.49435e+07	4.13232e+07	2.96878e+07	3.46313e+07	12		25.2239	26.2711	26.5497	26.3177	25.9936	26.1053	24.9094	25.0115	25.0585	25.3004	24.8234	25.0456		2.44556	3.23958	3.34914	3.21771	3.02332	2.97346	2.62617	2.34344	2.72772	2.84708	2.8954	2.60399	2.85771				2.7917	3.75483	3.94778	3.75843
P27797	Calreticulin	CALR	2.98944e+08	3.72839e+08	4.59674e+08	4.22195e+08	3.52137e+08	4.17364e+08	2.49699e+08	3.21988e+08	2.80321e+08	2.5488e+08	2.3241e+08	3.12367e+08	12		28.1553	28.474	28.776	28.6533	28.3916	28.6367	27.8956	28.2624	28.0625	27.9252	27.7921	28.2187		5.37697	5.44244	5.57551	5.55339	5.42127	5.50491	5.61237	5.59434	5.7317	5.47188	5.86413	5.77708	5.57717				6.13801	6.30804	6.57211	6.48661
P49411	Elongation factor Tu, mitochondrial	TUFM	2.3376e+08	1.9095e+08	2.14727e+08	1.72495e+08	2.4387e+08	1.53263e+08	1.32718e+08	2.00881e+08	1.46949e+08	1.57658e+08	1.07228e+08	1.55653e+08	12		27.8005	27.5086	27.6779	27.362	27.8615	27.1914	26.9838	27.5818	27.1307	27.2322	26.6761	27.2138		5.02212	4.47708	4.4774	4.26203	4.89124	4.05961	4.70054	4.91368	4.79994	4.77886	4.74813	4.77217	4.65857				5.73294	5.18914	5.27772	4.97825
P49257	Protein ERGIC-53	LMAN1	1.25577e+08	1.20188e+08	9.36288e+07	1.31874e+08	1.27161e+08	1.47417e+08	4.78724e+07	1.07733e+08	54091258	6.36083e+07	5.68338e+07	1.0056e+08	12		26.904	26.8407	26.4804	26.9746	26.9221	27.1353	25.5127	26.6829	25.6889	25.9227	25.7602	26.5835		4.12566	3.80917	3.27993	3.87464	3.95179	4.00351	3.22945	4.0148	3.35809	3.46934	3.83228	4.14189	3.75755				4.7096	4.41501	3.8662	4.52576
O00567	Nucleolar protein 56	NOP56	9.09457e+07	92320871	8.0892e+07	9.68516e+07	9.18078e+07	8.94159e+07	4.89351e+07	7.58241e+07	5.53667e+07	7.19998e+07	5.69849e+07	8.30268e+07	12		26.4385	26.4602	26.2695	26.5293	26.4521	26.414	25.5444	26.1762	25.7225	26.1015	25.7641	26.3071		3.66017	3.42861	3.06897	3.42933	3.48182	3.28221	3.26112	3.50806	3.39171	3.64812	3.83611	3.86549	3.48848				4.17822	3.97393	3.61753	4.00561
P21796	Voltage-dependent anion-selective channel protein 1	VDAC1	3.30881e+08	4.32869e+08	4.38801e+08	4.77704e+08	3.77116e+08	3.75755e+08	2.3645e+08	3.05714e+08	3.09927e+08	2.81549e+08	2.65947e+08	3.36567e+08	12		28.3017	28.6894	28.709	28.8315	28.4904	28.4852	27.817	28.1876	28.2074	28.0688	27.9866	28.3263		5.52341	5.65782	5.50847	5.73159	5.52014	5.35339	5.53372	5.51952	5.87655	5.61545	6.0586	5.88473	5.64861				6.30517	6.55768	6.49308	6.69477
Q9Y678	Coatomer subunit gamma-1	COPG1	3.4449e+07	5.06992e+07	6.64061e+07	5.67334e+07	5.74511e+07	5.74796e+07	1.92935e+07	2.67039e+07	2.41104e+07	2.54663e+07	1.59203e+07	3.3514e+07	12		25.038	25.5955	25.9848	25.7577	25.7758	25.7765	24.2016	24.6705	24.5232	24.6021	23.9244	24.9983		2.25962	2.56392	2.78429	2.65775	2.80554	2.64472	1.91837	2.00246	2.19235	2.14872	1.99639	2.55667	2.37757				2.57945	2.97171	3.28197	3.10437
Q15029	116 kDa U5 small nuclear ribonucleoprotein component	EFTUD2	4.44344e+07	8.31337e+07	4.05469e+07	3.3794e+07	19947287	7.04709e+07	2.31455e+07	3.63227e+07	2.99476e+07	5.51405e+07	2.38215e+07	5.63792e+07	12		25.4052	26.3089	25.2731	25.0103	24.2497	26.0705	24.4642	25.1144	24.8359	25.7166	24.5058	25.7487		2.62684	3.27739	2.07257	1.91032	1.2794	2.9387	2.18098	2.44628	2.50513	3.26324	2.57779	3.30707	2.53214				2.99864	3.79865	2.44303	2.23134
P22626	Heterogeneous nuclear ribonucleoproteins A2/B1	HNRNPA2B1	3.04899e+08	3.80952e+08	4.15426e+08	3.59282e+08	4.3392e+08	334370490	183329408	2.68191e+08	1.55007e+08	1.86118e+08	1.50235e+08	2.12044e+08	12		28.1838	28.505	28.63	28.4205	28.6929	28.3169	27.4499	27.9987	27.2078	27.4716	27.1626	27.6598		5.40542	5.47349	5.42949	5.32059	5.72256	5.18505	5.16662	5.3306	4.87696	5.01827	5.23468	5.21821	5.28183				6.17049	6.34404	6.39999	6.2147
P29401	Transketolase	TKT	1.37966e+08	1.43774e+08	1.99223e+08	1.95676e+08	2.12269e+08	1.96546e+08	9.21321e+07	1.3412e+08	66349384	7.71852e+07	2.20097e+07	3.11349e+07	12		27.0397	27.0992	27.5698	27.5439	27.6613	27.5503	26.4572	26.9989	25.9836	26.2018	24.3916	24.892		4.26141	4.06768	4.36928	4.44394	4.69102	4.41847	4.17396	4.33085	3.65278	3.74845	2.46367	2.45044	3.92266				4.86456	4.71464	5.15027	5.19073
Q12906	Interleukin enhancer-binding factor 3	ILF3	67844802	7.95438e+07	1.20575e+08	83508588	2.14825e+08	9.45924e+07	2.43572e+07	3.85808e+07	2.19381e+07	2.00469e+07	1.23937e+07	3.33242e+07	12		26.0157	26.2452	26.8454	26.3154	27.6786	26.4952	24.5378	25.2014	24.3869	24.2569	23.5631	24.9901		3.2374	3.21371	3.64483	3.21547	4.7083	3.3634	2.2546	2.53329	2.05613	1.80351	1.63513	2.54848	2.85119				3.69562	3.72484	4.29633	3.75582
Q13263	Transcription intermediary factor 1-beta	TRIM28	3.69461e+07	1.03576e+08	1.03256e+08	1.06627e+08	6.39708e+07	9.85426e+07	3.03934e+07	3.35784e+07	2.0694e+07	3.40535e+07	2.47434e+07	4.12016e+07	12		25.1389	26.6261	26.6216	26.668	25.9309	26.5542	24.8573	25.001	24.3027	25.0213	24.5605	25.2962		2.36058	3.59457	3.42112	3.56805	2.96062	3.42242	2.57401	2.33294	1.97191	2.56793	2.63257	2.85461	2.85511				2.6947	4.16628	4.03263	4.16765
P50991	T-complex protein 1 subunit delta	CCT4	9.70185e+07	9.14951e+07	7.76083e+07	8.69206e+07	1.23286e+08	1.13156e+08	6.32721e+07	1.04056e+08	9.44817e+07	1.10626e+08	4.28943e+07	9.13487e+07	12		26.5318	26.4472	26.2097	26.3732	26.8774	26.7537	25.9151	26.6328	26.4935	26.7211	25.3543	26.4449		3.75342	3.41565	3.00918	3.27325	3.90714	3.62191	3.63182	3.9647	4.16273	4.26775	3.42631	4.0033	3.7031				4.28467	3.9589	3.54706	3.8233
Q99460	26S proteasome non-ATPase regulatory subunit 1	PSMD1	5.59223e+07	5.14244e+07	5.63701e+07	5.49038e+07	4.46901e+07	5.1925e+07	3.03699e+07	4.25821e+07	2.92656e+07	5.06742e+07	2.82925e+07	4.66797e+07	12		25.7369	25.6159	25.7484	25.7104	25.4135	25.6299	24.8561	25.3437	24.8027	25.5947	24.7539	25.4763		2.95859	2.58441	2.5479	2.61045	2.44316	2.4981	2.5729	2.67566	2.4719	3.14138	2.82595	3.03471	2.69709				3.37734	2.99545	3.00333	3.04913
P11387	DNA topoisomerase 1	TOP1	5.60986e+07	8.12792e+07	7.32135e+07	7.60173e+07	9.05499e+07	8.58599e+07	4.25943e+07	5.74899e+07	4.06102e+07	4.32129e+07	3.03405e+07	4.19935e+07	12		25.7415	26.2764	26.1256	26.1798	26.4322	26.3555	25.3442	25.7768	25.2753	25.365	24.8547	25.3237		2.96313	3.24484	2.92508	3.07988	3.46192	3.22366	3.06091	3.10872	2.94454	2.91159	2.92677	2.88208	3.06109				3.38252	3.76093	3.44793	3.59744
Q12931	Heat shock protein 75 kDa, mitochondrial	TRAP1	9.39189e+07	1.10166e+08	5.86848e+07	1.27284e+08	1.29776e+08	1.16365e+08	3.83151e+07	7.37788e+07	5.77436e+07	5.81791e+07	3.40235e+07	5.0327e+07	12		26.4849	26.7151	25.8065	26.9235	26.9514	26.7941	25.1914	26.1367	25.7832	25.794	25.02	25.5848		3.70658	3.68357	2.60596	3.82353	3.98115	3.66226	2.90816	3.46861	3.45235	3.34063	3.09206	3.14324	3.40568				4.2312	4.26943	3.07176	4.46606
P16615	Sarcoplasmic/endoplasmic reticulum calcium ATPase 2	ATP2A2	5.1373e+07	6.83325e+07	5.66585e+07	5.46441e+07	25384174	5.26043e+07	3.18655e+07	2.88294e+07	2.57645e+07	2.73536e+07	2.85023e+07	2.27295e+07	12		25.6145	26.0261	25.7558	25.7036	24.5974	25.6487	24.9255	24.781	24.6189	24.7052	24.7646	24.4381		2.83618	2.99453	2.55527	2.60361	1.62713	2.51686	2.64225	2.11295	2.28808	2.25186	2.83661	1.99648	2.43848				3.2376	3.4708	3.01201	3.04114
P51812	Ribosomal protein S6 kinase alpha-3	RPS6KA3	5.33186e+07	7.70005e+07	8.76615e+07	7.77359e+07	9.73039e+07	6.5272e+07	1.6592e+07	5.08125e+07	1.91593e+07	2.27955e+07	1.46257e+07	3.84556e+07	12		25.6681	26.1984	26.3854	26.2121	26.536	25.96	23.984	25.5987	24.1915	24.4422	23.802	25.1967		2.8898	3.16682	3.18492	3.11213	3.5657	2.82814	1.70074	2.93059	1.86074	1.98888	1.87404	2.7551	2.6548				3.29882	3.6705	3.7542	3.63511
P18669	Phosphoglycerate mutase 1	PGAM1	2.87116e+08	2.96962e+08	3.35975e+08	3.25245e+08	2.60441e+08	2.57539e+08	1.78075e+08	2.2351e+08	1.29136e+08	1.3501e+08	7.29786e+07	8.79235e+07	12		28.0971	28.1457	28.3238	28.277	27.9564	27.9402	27.4079	27.7358	26.9443	27.0085	26.121	26.3897		5.31873	5.11416	5.12325	5.17701	4.98609	4.8084	5.12467	5.06768	4.61351	4.55512	4.193	3.94816	4.83581				6.07152	5.92756	6.03901	6.04698
Q13435	Splicing factor 3B subunit 2	SF3B2	2.38296e+07	1.61353e+07	2.28561e+07	1.80794e+07	3.16905e+07	1.90423e+07	1.71004e+07	2.20846e+07	2.72145e+07	2.90936e+07	1.40617e+07	1.62707e+07	12		24.5063	23.9437	24.4461	24.1078	24.9175	24.1827	24.0275	24.3965	24.6979	24.7942	23.7453	23.9558		1.72792	0.912174	1.24555	1.00789	1.94725	1.05088	1.74428	1.72845	2.36707	2.34083	1.8173	1.51419	1.61698				1.97248	1.05725	1.46819	1.17726
Q14980	Nuclear mitotic apparatus protein 1	NUMA1	1.39882e+07	1.17086e+07	1.43436e+07	1.4383e+07	12352539	1.17796e+07	2.0248e+07	1.2771e+07	1.15738e+07	1.08147e+07	1.2356e+07	6.45492e+06	12		23.7377	23.4811	23.7739	23.7779	23.5583	23.4898	24.2713	23.6064	23.4644	23.3665	23.5587	22.622		0.959375	0.449527	0.573377	0.677909	0.58801	0.35796	1.98803	0.938274	1.13355	0.913123	1.63074	0.180384	0.865855				1.09516	0.521023	0.675865	0.791829
P17301	Integrin alpha-2	ITGA2	2.15717e+08	1.89764e+08	2.86559e+08	1.78469e+08	2.53858e+08	1.60431e+08	9.81909e+07	1.26647e+08	102660385	1.21384e+08	1.4346e+08	1.36111e+08	12		27.6846	27.4996	28.0943	27.4111	27.9194	27.2574	26.5491	26.9162	26.6133	26.855	27.0961	27.0202		4.90623	4.46809	4.89373	4.31115	4.94915	4.12555	4.26584	4.24815	4.2825	4.40164	5.1681	4.57862	4.5499				5.60065	5.17873	5.76846	5.03563
P49368	T-complex protein 1 subunit gamma	CCT3	7.61941e+07	1.53753e+08	1.34718e+08	1.03986e+08	7.56803e+07	1.07612e+08	5.51352e+07	6.79375e+07	4.69722e+07	5.94709e+07	4.36974e+07	4.28025e+07	12		26.1832	27.196	27.0054	26.6318	26.1734	26.6813	25.7165	26.0177	25.4853	25.8257	25.381	25.3512		3.40484	4.1645	3.80485	3.53186	3.20312	3.54944	3.43322	3.34961	3.1545	3.37231	3.45308	2.90961	3.44425				3.88676	4.82686	4.48495	4.12538
P17858	ATP-dependent 6-phosphofructokinase, liver type	PFKL	8.12434e+07	9.12246e+07	6.96932e+07	1.04786e+08	1.30803e+08	8.97598e+07	2.18135e+07	7.01436e+07	4.15181e+07	5.50383e+07	1.83478e+07	3.50246e+07	12		26.2757	26.4429	26.0545	26.6429	26.9628	26.4196	24.3787	26.0638	25.3072	25.7139	24.1291	25.0619		3.49742	3.41138	2.85399	3.54293	3.99253	3.28774	2.09547	3.39572	2.97643	3.26057	2.20113	2.62028	3.09463				3.99243	3.95395	3.36413	4.1383
P00352	Retinal dehydrogenase 1	ALDH1A1	4.77226e+07	7.56308e+07	1.10121e+08	9.75241e+07	1.02767e+08	1.26455e+08	1.84209e+07	1.14935e+08	3.06041e+07	36369933	8.31564e+06	1.37701e+07	12		25.5082	26.1725	26.7145	26.5393	26.6148	26.914	24.1348	26.7762	24.8672	25.1162	22.9874	23.715		2.72984	3.14093	3.51399	3.43931	3.64451	3.78222	1.8516	4.10815	2.53642	2.66288	1.05943	1.27345	2.81189				3.11621	3.64049	4.14209	4.01727
P55084	Trifunctional enzyme subunit beta, mitochondrial	HADHB	1.23332e+08	1.28012e+08	1.67142e+08	1.6256e+08	1.16107e+08	1.49774e+08	1.12074e+08	1.2389e+08	1.07498e+08	1.21378e+08	8.72439e+07	1.07988e+08	12		26.878	26.9317	27.3165	27.2764	26.7909	27.1582	26.7399	26.8845	26.6797	26.8549	26.3786	26.6863		4.09964	3.90016	4.11597	4.17645	3.82058	4.02639	4.45663	4.21639	4.34893	4.40156	4.45058	4.24471	4.18817				4.6799	4.52047	4.85168	4.87829
P14868	Aspartate--tRNA ligase, cytoplasmic	DARS	1.58169e+08	1.70752e+08	1.90586e+08	231232011	1.95811e+08	1.7277e+08	4.60785e+07	1.33624e+08	1.30528e+08	1.48653e+08	4.96917e+07	1.40831e+08	12		27.2369	27.3473	27.5059	27.7848	27.5449	27.3643	25.4576	26.9936	26.9598	27.1474	25.5665	27.0694		4.45856	4.31579	4.30534	4.68482	4.57459	4.23246	3.17435	4.32552	4.62898	4.69401	3.63853	4.62781	4.30506				5.08962	5.0022	5.0749	5.47208
O75083	WD repeat-containing protein 1	WDR1	7.33899e+07	1.0143e+08	1.25659e+08	9.47642e+07	7.70456e+07	1.03239e+08	5.08781e+07	7.55359e+07	4.54886e+07	5.47938e+07	4.26806e+07	5.55799e+07	12		26.1291	26.5959	26.9049	26.4978	26.1992	26.6214	25.6005	26.1707	25.439	25.7075	25.3471	25.7281		3.35075	3.56437	3.70442	3.39789	3.22892	3.48959	3.3173	3.50257	3.1082	3.25414	3.41911	3.28648	3.38531				3.825	4.13127	4.36656	3.96889
Q99798	Aconitate hydratase, mitochondrial	ACO2	2.19328e+07	1.71024e+07	4.34875e+07	4.56761e+07	3.43715e+07	5.12249e+07	7.43224e+07	2.48182e+07	8.96331e+07	9.63985e+07	5.042e+07	7.82328e+06	12		24.3866	24.0277	25.3741	25.4449	25.0347	25.6103	26.1473	24.5649	26.4175	26.5225	25.5875	22.8993		1.60825	0.996154	2.17357	2.34499	2.06441	2.47852	3.86405	1.89681	4.08673	4.06914	3.65952	0.457758	2.47499				1.83588	1.15459	2.56209	2.73905
P46940	Ras GTPase-activating-like protein IQGAP1	IQGAP1	2.49104e+07	4.09065e+07	2.90482e+07	5.52249e+07	5.50379e+07	5.69047e+07	1.14219e+07	2.54142e+07	1.08821e+07	1.25045e+07	1.0558e+07	2.02313e+07	12		24.5702	25.2858	24.7919	25.7188	25.7139	25.762	23.4453	24.5991	23.3755	23.5759	23.3318	24.2701		1.79191	2.25429	1.59142	2.61887	2.74363	2.63022	1.16206	1.93104	1.04465	1.12258	1.40386	1.8285	1.84359				2.04553	2.61282	1.87588	3.05896
Q9UQ80	Proliferation-associated protein 2G4	PA2G4	1.1211e+08	1.94281e+08	1.65527e+08	1.7595e+08	1.39985e+08	1.70172e+08	3.33635e+07	8.94763e+07	25554855	2.33566e+07	2.44402e+07	6.15236e+07	12		26.7403	27.5336	27.3025	27.3906	27.0607	27.3424	24.9918	26.415	24.6071	24.4773	24.5428	25.8746		3.96201	4.50203	4.10197	4.29064	4.0904	4.21059	2.70852	3.74691	2.27629	2.02396	2.61478	3.43305	3.49676				4.52278	5.21806	4.83518	5.01167
P06744	Glucose-6-phosphate isomerase	GPI	1.15991e+08	9.48478e+07	1.44596e+08	1.09572e+08	1.44641e+08	1.08436e+08	7.26748e+07	9.88107e+07	4.56927e+07	5.20071e+07	2.28693e+07	27074478	12		26.7894	26.4991	27.1075	26.7073	27.1079	26.6923	26.115	26.5582	25.4455	25.6322	24.4469	24.6904		4.0111	3.46757	3.90693	3.60736	4.1376	3.56044	3.83171	3.89007	3.11466	3.17884	2.51894	2.24885	3.45617				4.57883	4.01908	4.60528	4.21356
Q9Y5B9	FACT complex subunit SPT16	SUPT16H	2.25983e+07	1.92466e+07	4.26442e+07	46526731	2.70189e+07	2.16e+07	1.60012e+07	2.03874e+07	1.69534e+07	1.94083e+07	1.33865e+07	1.97261e+07	12		24.4297	24.1981	25.3458	25.4716	24.6875	24.3645	23.9317	24.2812	24.0151	24.2102	23.6743	24.2336		1.65138	1.16656	2.14532	2.37161	1.71717	1.23271	1.64843	1.61308	1.68427	1.75681	1.74631	1.79202	1.71047				1.88511	1.3521	2.52879	2.77015
Q14152	Eukaryotic translation initiation factor 3 subunit A	EIF3A	6.58019e+07	5.05242e+07	5.01407e+07	5.65702e+07	5.0728e+07	4.03188e+07	2.55441e+07	5.36845e+07	5.48669e+07	5.76348e+07	18857543	4.96372e+07	12		25.9716	25.5905	25.5795	25.7535	25.5963	25.2649	24.6065	25.678	25.7094	25.7804	24.1686	25.5649		3.19329	2.55893	2.37895	2.65359	2.62598	2.13313	2.32324	3.00991	3.37863	3.32707	2.24067	3.12333	2.74556				3.64526	2.96592	2.80418	3.09952
P42330	Aldo-keto reductase family 1 member C3	AKR1C3	1.63892e+08	2.1368e+08	1.41127e+08	1.84134e+08	6.93557e+07	1.82446e+08	8.65249e+07	1.43165e+08	1.06154e+08	1.12173e+08	5.90222e+07	1.31993e+08	12		27.2882	27.6709	27.0724	27.4562	26.0475	27.4429	26.3666	27.0931	26.6616	26.7412	25.8148	26.9759		4.50983	4.63934	3.87189	4.35624	3.07722	4.31107	4.08337	4.42501	4.33078	4.28779	3.88678	4.5343	4.1928				5.14814	5.37721	4.56398	5.08828
P98160	Basement membrane-specific heparan sulfate proteoglycan core protein	HSPG2	5.56487e+06	8.75846e+06	1.63989e+07	1.07921e+07	7.29935e+06	8.2783e+06	3.12218e+06	4.47221e+06	4.69641e+06	2.97416e+06	5.51321e+06	5.53352e+06	12		22.4079	23.0622	23.9671	23.3635	22.7993	22.9809	21.5741	22.0926	22.1631	21.5041	22.3945	22.3998		-0.370417	0.030706	0.766574	0.263527	-0.170958	-0.150918	-0.709125	-0.575532	-0.167675	-0.949314	0.466492	-0.0418177	-0.134038				-0.422844	0.0355898	0.903596	0.307812
O43390	Heterogeneous nuclear ribonucleoprotein R	HNRNPR	9.81543e+07	1.15921e+08	1.67207e+08	1.41857e+08	1.50862e+08	1.73152e+08	6.97754e+07	7.65723e+07	8.51307e+07	8.88362e+07	8.92164e+07	1.16247e+08	12		26.5485	26.7886	27.3171	27.0799	27.1687	27.3675	26.0562	26.1903	26.3432	26.4046	26.4108	26.7926		3.77022	3.75703	4.11654	3.97991	4.19836	4.23565	3.77297	3.52223	4.01237	3.95128	4.48284	4.35103	4.01253				4.30384	4.35457	4.85235	4.64872
Q9UPN3	Microtubule-actin cross-linking factor 1, isoforms 1/2/3/5	MACF1	1.65831e+06	2.03126e+06	2.06444e+06	1.93156e+06	2.58635e+06	3.34478e+07	1.20043e+07	2.9349e+06	2.09125e+06	2.50686e+06	1.15416e+07	1.44273e+06	12		20.6613	20.9539	20.9773	20.8813	21.3025	24.9954	23.517	21.4849	20.9959	21.2575	23.4603	20.4604		-2.11705	-2.0776	-2.22321	-2.21861	-1.66781	1.86359	1.2338	-1.18321	-1.33487	-1.19592	1.53237	-1.98122	-0.947477				-2.41669	-2.40803	-2.62059	-2.59144
P26640	Valine--tRNA ligase	VARS	3.52288e+07	4.25937e+07	8.62675e+07	4.45929e+07	4.35943e+07	3.35704e+07	2.64464e+07	3.43187e+07	2.80894e+07	3.76176e+07	2.55242e+07	2.96202e+07	12		25.0703	25.3441	26.3623	25.4103	25.3776	25.0007	24.6566	25.0325	24.7435	25.1649	24.6054	24.8201		2.29192	2.3126	3.16179	2.31036	2.40734	1.86887	2.37333	2.3644	2.41272	2.71154	2.67739	2.37849	2.43923				2.61631	2.68041	3.72695	2.69861
P28331	NADH-ubiquinone oxidoreductase 75 kDa subunit, mitochondrial	NDUFS1	3.8984e+07	7.50944e+07	7.63768e+07	4.84737e+07	5.71677e+07	70575068	1.70867e+07	4.41037e+07	1.93184e+07	5.23395e+07	1.14284e+07	3.4217e+07	12		25.2164	26.1622	26.1866	25.5307	25.7687	26.0727	24.0264	25.3944	24.2035	25.6414	23.4461	25.0282		2.43804	3.13066	2.98611	2.43075	2.7984	2.94083	1.74312	2.72631	1.87267	3.18803	1.51815	2.58662	2.52998				2.78312	3.62859	3.51986	2.83923
P26639	Threonine--tRNA ligase, cytoplasmic	TARS	3.31631e+07	4.35322e+07	5.1874e+07	4.78108e+07	6.36172e+07	5.06231e+07	1.32949e+07	2.36461e+07	2.18848e+07	2.35435e+07	1.17431e+07	1.0267e+07	12		24.9831	25.3756	25.6285	25.5108	25.9229	25.5933	23.6644	24.4951	24.3834	24.4888	23.4853	23.2915		2.20474	2.34404	2.42799	2.41088	2.95262	2.46147	1.38113	1.82701	2.05262	2.03546	1.55734	0.849924	2.0421				2.5168	2.71685	2.86198	2.81602
P26599	Polypyrimidine tract-binding protein 1	PTBP1	9.04815e+07	1.17926e+08	1.77558e+08	1.45525e+08	1.2027e+08	1.40991e+08	5.78127e+07	8.51644e+07	3.76337e+07	5.06136e+07	2.6192e+07	5.7356e+07	12		26.4311	26.8133	27.4037	27.1167	26.8417	27.071	25.7849	26.3437	25.1655	25.593	24.6426	25.7734		3.65279	3.78177	4.20319	4.01674	3.87141	3.9392	3.50164	3.67566	2.83472	3.13966	2.71465	3.33186	3.55527				4.16979	4.38325	4.95449	4.69174
P18206	Vinculin	VCL	16667996	3.29009e+07	3.82478e+07	3.39319e+07	5.79946e+06	3.48874e+07	3.45644e+07	2.96163e+07	6.92781e+07	6.18203e+07	5.17735e+07	6.80305e+07	12		23.9906	24.9716	25.1889	25.0161	22.4675	25.0562	25.0428	24.8199	26.0459	25.8816	25.6257	26.0197		1.21224	1.94008	1.98835	1.91619	-0.502806	1.92438	2.75954	2.1518	3.71509	3.42821	3.69774	3.57809	2.31741				1.38382	2.24865	2.34376	2.2382
P51991	Heterogeneous nuclear ribonucleoprotein A3	HNRNPA3	3.02007e+08	3.24084e+08	3.71968e+08	3.08065e+08	2.80955e+08	3.42384e+08	1.37254e+08	2.67741e+08	1.92534e+08	2.32339e+08	1.32725e+08	2.78494e+08	12		28.17	28.2718	28.4706	28.1987	28.0658	28.351	27.0323	27.9963	27.5205	27.7917	26.9839	28.0531		5.39167	5.24025	5.27008	5.09871	5.09547	5.21922	4.74903	5.32817	5.18974	5.33829	5.05589	5.61149	5.21567				6.1548	6.0737	6.21208	5.95553
Q92896	Golgi apparatus protein 1	GLG1	1.48212e+07	3.38224e+07	2.30619e+07	26338119	3.81693e+07	3.22979e+07	7.94931e+06	1.48144e+07	1.05251e+07	1.11238e+07	6.84516e+06	9.05989e+06	12		23.8212	25.0115	24.459	24.6506	25.1859	24.9449	22.9224	23.8205	23.3273	23.4071	22.7067	23.1111		1.04282	1.97993	1.25848	1.5507	2.21561	1.81311	0.639153	1.15241	0.996529	0.953779	0.778683	0.669479	1.25422				1.19042	2.29484	1.48343	1.81129
O60763	General vesicular transport factor p115	USO1	3.71223e+07	4.34779e+07	8.20275e+07	4.58382e+07	3.95819e+07	6.7409e+07	8.19188e+06	3.53129e+07	1.76784e+07	2.62025e+07	6.83113e+06	2.36401e+07	12		25.1458	25.3738	26.2896	25.45	25.2383	26.0064	22.9658	25.0737	24.0755	24.6432	22.7037	24.4947		2.36745	2.34224	3.08908	2.3501	2.26804	2.87462	0.682518	2.4056	1.74468	2.18983	0.775723	2.05315	2.09525				2.70253	2.71477	3.64124	2.74502
Q92499	ATP-dependent RNA helicase DDX1	DDX1	3.25999e+07	2.70007e+07	3.18967e+07	3.15426e+07	2.92531e+07	3.65584e+07	1.30783e+07	2.59821e+07	2.04218e+07	2.34365e+07	9.27094e+06	2.00245e+07	12		24.9584	24.6865	24.9269	24.9108	24.8021	25.1237	23.6407	24.631	24.2836	24.4823	23.1443	24.2553		2.18003	1.65495	1.72638	1.81085	1.83179	1.99188	1.35742	1.96293	1.9528	2.02889	1.21631	1.81368	1.79399				2.48859	1.91817	2.03496	2.11516
P11413	Glucose-6-phosphate 1-dehydrogenase	G6PD	2.12403e+07	7.60955e+07	1.02795e+08	5.78551e+07	9.92298e+06	5.90188e+07	2.08626e+07	2.90061e+07	2.64155e+07	2.86024e+07	1.26977e+07	2.63741e+07	12		24.3403	26.1813	26.6152	25.7859	23.2423	25.8147	24.3144	24.7899	24.6549	24.7696	23.5981	24.6526		1.56197	3.14977	3.41467	2.68599	0.272048	2.68285	2.03117	2.12177	2.32408	2.31627	1.67009	2.21104	2.20348				1.78305	3.65073	4.02502	3.13736
Q8NE71	ATP-binding cassette sub-family F member 1	ABCF1	5.54679e+07	4.87314e+07	7.45814e+07	5.51547e+07	2.54093e+07	7.56232e+07	2.41486e+07	5.74304e+07	3.30472e+07	4.67946e+07	1.63411e+07	2.70482e+07	12		25.7251	25.5383	26.1523	25.717	24.5989	26.1723	24.5254	25.7753	24.978	25.4798	23.962	24.689		2.94682	2.50681	2.95179	2.61703	1.62856	3.0405	2.24219	3.10722	2.64722	3.02647	2.03403	2.24745	2.58301				3.3639	2.90551	3.47941	3.05682
O00468	Agrin	AGRN	4.227e+06	3.87024e+07	8.52206e+07	5.69127e+07	1.05817e+06	6.83066e+07	2.98046e+06	7.40333e+06	4.766e+06	5.23994e+06	5.79783e+06	6501552	12		22.0112	25.2059	26.3447	25.7622	20.0131	26.0255	21.5071	22.8197	22.1843	22.3211	22.4671	22.6324		-0.767129	2.17438	3.14417	2.6623	-2.95715	2.8937	-0.776139	0.151654	-0.146454	-0.132247	0.539112	0.190768	0.581414				-0.875707	2.52021	3.70618	3.10969
Q92878	DNA repair protein RAD50	RAD50	1.65231e+07	3.76912e+07	8.57354e+06	5.11101e+07	4.4255e+06	4.48396e+06	2.56391e+06	2.45214e+06	6.80491e+06	2.16853e+06	2.94178e+06	3.58372e+07	12		23.978	25.1677	23.0315	25.6071	22.0774	22.0963	21.2899	21.2256	22.6981	21.0483	21.4883	25.095		1.19965	2.13619	-0.169064	2.50716	-0.892884	-1.03548	-0.993329	-1.44248	0.367343	-1.40508	-0.439713	2.65337	0.207139				1.36944	2.47594	-0.199284	2.92847
P08183	ATP-dependent translocase ABCB1	ABCB1	2.56987e+07	2.28227e+07	2.90961e+07	2.60173e+07	3.62203e+07	2.62598e+07	1.43756e+07	2.61281e+07	2.87238e+07	3.17696e+07	1.1612e+07	3.40646e+07	12		24.6152	24.444	24.7943	24.633	25.1103	24.6464	23.7771	24.6391	24.7757	24.9211	23.4691	25.0218		1.83686	1.41243	1.5938	1.53302	2.14	1.51453	1.49388	1.97101	2.44494	2.46778	1.54114	2.58018	1.87746				2.09684	1.63707	1.87868	1.79064
P0DMN0	Sulfotransferase 1A4	SULT1A4	1.11815e+08	1.54028e+08	1.97342e+08	1.75819e+08	2.17931e+08	2.0791e+08	6.44097e+07	102401191	6.87042e+07	7.76676e+07	6.81572e+07	7.65863e+07	12		26.7365	27.1986	27.5561	27.3895	27.6993	27.6314	25.9408	26.6097	26.0339	26.2108	26.0224	26.1906		3.95821	4.16708	4.3556	4.28957	4.72901	4.49956	3.65753	3.94157	3.70309	3.75744	4.09439	3.749	4.07517				4.51845	4.82984	5.13414	5.01041
P28838	Cytosol aminopeptidase	LAP3	4.05496e+07	49918898	9.80283e+07	1.02156e+08	3.58419e+07	114045356	3.13493e+07	3.26149e+07	2.57908e+07	2.73072e+07	2.26476e+07	2.85474e+07	12		25.2732	25.5731	26.5467	26.6062	25.0951	26.765	24.9019	24.959	24.6204	24.7028	24.4329	24.7669		2.49485	2.54154	3.34617	3.50626	2.12485	3.63321	2.61868	2.29094	2.28955	2.24941	2.50489	2.32527	2.66047				2.84797	2.94577	3.94428	4.09547
Q92597	Protein NDRG1	NDRG1	1.29562e+08	1.20237e+08	1.27997e+08	1.38793e+08	1.74501e+08	1.41554e+08	9.34809e+07	1.06989e+08	1.05095e+08	1.2404e+08	8.92121e+07	1.10425e+08	12		26.9491	26.8413	26.9315	27.0484	27.3787	27.0768	26.4782	26.6729	26.6471	26.8862	26.4107	26.7185		4.17073	3.80977	3.73101	3.94841	4.40837	3.94496	4.19492	4.0048	4.31632	4.43287	4.48277	4.2769	4.14349				4.76105	4.4157	4.39791	4.61193
P23246	Splicing factor, proline- and glutamine-rich	SFPQ	5.22737e+08	9.75913e+08	6.48984e+08	7.33506e+08	5.94861e+08	6.78095e+08	9.47442e+07	5.38368e+08	3.52704e+08	3.48251e+08	8.95524e+07	2.90109e+08	12		28.9615	29.8622	29.2736	29.4502	29.148	29.3369	26.4975	29.004	28.3939	28.3756	26.4162	28.112		6.18318	6.83064	6.07308	6.35029	6.17768	6.20509	4.21429	6.33593	6.06308	5.92219	4.48826	5.67043	5.87618				7.05833	7.91703	7.15862	7.41743
Q93009	Ubiquitin carboxyl-terminal hydrolase 7	USP7	1.75895e+07	2.1977e+07	5.46395e+07	34715859	2.85694e+07	1.86196e+07	1.06718e+07	1.53508e+07	8.15322e+06	1.02506e+07	5.71272e+06	1.51522e+07	12		24.0682	24.3895	25.7034	25.0491	24.768	24.1503	23.3473	23.8718	22.9589	23.2892	22.4457	23.853		1.28988	1.35795	2.50292	1.94914	1.79767	1.01849	1.06405	1.20372	0.628137	0.835842	0.517777	1.41144	1.29809				1.47244	1.57393	2.9503	2.27669
Q7Z6Z7	E3 ubiquitin-protein ligase HUWE1	HUWE1	1.16172e+07	1.59315e+07	1.25154e+07	1.20994e+07	16719888	2.23732e+07	3.12358e+07	1.08998e+07	5.92478e+06	2.12652e+07	3.08877e+07	6.04503e+06	12		23.4698	23.9254	23.5772	23.5284	23.9951	24.4153	24.8967	23.3778	22.4983	24.342	24.8805	22.5273		0.691422	0.893842	0.376682	0.428483	1.02477	1.28344	2.61345	0.709711	0.167528	1.88862	2.95256	0.0857335	1.09302				0.789284	1.03601	0.444012	0.500488
P23378	Glycine dehydrogenase (decarboxylating), mitochondrial	GLDC	3.60347e+07	2.88929e+07	35744742	2.40255e+07	2.72073e+07	2.29024e+07	1.16457e+07	2.08753e+07	1.57615e+07	1.77106e+07	8.86838e+06	8.08489e+07	12		25.1029	24.7842	25.0912	24.5181	24.6975	24.449	23.4733	24.3153	23.9099	24.0781	23.0802	26.2687		2.32455	1.75267	1.8907	1.41811	1.7272	1.31717	1.19005	1.64721	1.5791	1.62474	1.15227	3.82714	1.78758				2.65356	2.03143	2.22866	1.65642
Q96HE7	ERO1-like protein alpha	ERO1A	5.13428e+07	7.39474e+07	7.98909e+07	6.26163e+07	75471250	5.99898e+07	5.21956e+07	4.04001e+07	4.61226e+07	5.9343e+07	3.92315e+07	5.79454e+07	12		25.6137	26.14	26.2515	25.9	26.1694	25.8382	25.6374	25.2679	25.459	25.8226	25.2255	25.7882		2.83533	3.10846	3.051	2.80009	3.19913	2.70639	3.35418	2.59977	3.12817	3.36921	3.29754	3.34661	3.06632				3.23663	3.60285	3.59636	3.27063
P04181	Ornithine aminotransferase, mitochondrial	OAT	7.58579e+07	9.30175e+07	1.08834e+08	9.6567e+07	6.908e+07	1.10031e+08	6.58127e+07	9.49544e+07	8.88748e+07	1.01157e+08	5.7888e+07	9.27381e+07	12		26.1768	26.471	26.6976	26.525	26.0418	26.7133	25.9719	26.5007	26.4053	26.592	25.7868	26.4667		3.39846	3.43946	3.49703	3.42508	3.07147	3.58151	3.68862	3.83264	4.07447	4.13866	3.85879	4.02507	3.66927				3.87947	3.9865	4.12211	4.00065
Q93008	Probable ubiquitin carboxyl-terminal hydrolase FAF-X	USP9X	2.03463e+06	4.58483e+06	5.13605e+06	6.5576e+06	3.26359e+06	5.73122e+06	3.60495e+07	2.04969e+06	3.19531e+06	2.3479e+06	3.36327e+07	2.27129e+06	12		20.9563	22.1284	22.2922	22.6447	21.638	22.4504	25.1035	20.967	21.6075	21.1629	25.0034	21.1151		-1.82199	-0.903104	-0.908297	-0.455211	-1.33226	-0.681411	2.82023	-1.70111	-0.72328	-1.29043	3.07539	-1.3265	-0.437332				-2.07988	-1.04674	-1.07065	-0.531708
O60506	Heterogeneous nuclear ribonucleoprotein Q	SYNCRIP	3.66816e+07	5.36697e+07	5.98321e+07	5.61808e+07	5.69042e+07	4.31322e+07	3.19975e+07	3.11618e+07	2.09375e+07	2.03754e+07	2.05888e+07	1.93635e+07	12		25.1286	25.6776	25.8344	25.7436	25.762	25.3623	24.9315	24.8933	24.3196	24.2803	24.2954	24.2068		2.35022	2.64606	2.63389	2.64363	2.79174	2.23044	2.64821	2.22519	1.98878	1.82696	2.36739	1.76525	2.34315				2.68286	3.06691	3.10469	3.08788
Q92945	Far upstream element-binding protein 2	KHSRP	5.4539e+07	6.15506e+07	6.84093e+07	6.51159e+07	6.94153e+07	5.81806e+07	3.8276e+07	5.84178e+07	2.57002e+07	2.48024e+07	1.29434e+07	1.46059e+07	12		25.7008	25.8753	26.0277	25.9565	26.0488	25.794	25.1899	25.7999	24.6153	24.564	23.6257	23.8		2.92245	2.84373	2.82717	2.85656	3.07846	2.66221	2.90669	3.13182	2.28447	2.11061	1.69774	1.35846	2.5567				3.33609	3.29602	3.33251	3.33659
P52948	Nuclear pore complex protein Nup98-Nup96	NUP98	4.55778e+07	7.01777e+07	6.60706e+07	6.4615e+07	5.70845e+07	6.03349e+07	2.2273e+06	3.97207e+07	1.90758e+07	2.02885e+07	3.16208e+06	1.62549e+07	12		25.4418	26.0645	25.9775	25.9454	25.7666	25.8465	21.0869	25.2434	24.1852	24.2742	21.5924	23.9544		2.66349	3.03297	2.77698	2.84542	2.7963	2.71467	-1.19638	2.5753	1.85444	1.82079	-0.335527	1.51279	1.92177				3.04048	3.51536	3.27335	3.32358
P19823	Inter-alpha-trypsin inhibitor heavy chain H2	ITIH2	6.06288e+07	8.05389e+07	1.24995e+08	1.32202e+08	1.04064e+08	1.77491e+08	3.65515e+07	4.18201e+07	7.09746e+07	9.00015e+07	8.28458e+07	1.45233e+08	12		25.8535	26.2632	26.8973	26.9782	26.6329	27.4032	25.1234	25.3177	26.0808	26.4234	26.3039	27.1138		3.07517	3.23164	3.69677	3.87823	3.6626	4.27135	2.84018	2.64961	3.75	3.97008	4.37596	4.67221	3.67282				3.51042	3.74563	4.35755	4.52995
O43795	Unconventional myosin-Ib	MYO1B	3.65186e+07	2.59092e+07	2.84876e+07	2.11722e+07	6.07007e+07	2.49292e+07	2.76489e+07	3.64167e+07	2.74667e+07	2.8037e+07	2.44775e+07	2.38109e+07	12		25.1221	24.627	24.7638	24.3357	25.8552	24.5713	24.7207	25.1181	24.7112	24.7408	24.5449	24.5051		2.3438	1.59542	1.56331	1.23572	2.88491	1.43951	2.43747	2.45001	2.38038	2.28746	2.61698	2.06353	2.10821				2.67553	1.84917	1.84274	1.44338
Q02790	Peptidyl-prolyl cis-trans isomerase FKBP4	FKBP4	6.28947e+07	8.31441e+07	3.81214e+07	4.76141e+07	4.87304e+07	4.28931e+07	5.8857e+07	5.23208e+07	3.95966e+07	3.86882e+07	4.81119e+07	3.41403e+07	12		25.9064	26.3091	25.1841	25.5049	25.5383	25.3542	25.8107	25.6409	25.2389	25.2054	25.5199	25.025		3.1281	3.27757	1.98358	2.40494	2.56803	2.22242	3.52747	2.97279	2.90807	2.75202	3.59192	2.58339	2.82669				3.57085	3.79886	2.33813	2.80908
Q9NSE4	Isoleucine--tRNA ligase, mitochondrial	IARS2	2.65773e+07	4.96682e+07	5.28399e+07	4.94498e+07	2.42266e+07	4.54992e+07	2.95438e+07	2.49477e+07	25905496	2.5475e+07	3.14884e+07	3.07836e+07	12		24.6637	25.5658	25.6551	25.5595	24.5301	25.4393	24.8164	24.5724	24.6268	24.6026	24.9083	24.8757		1.88536	2.53428	2.4546	2.45951	1.55979	2.30752	2.53311	1.90432	2.29595	2.14921	2.98035	2.43408	2.29151				2.15221	2.93735	2.89335	2.87282
P42765	3-ketoacyl-CoA thiolase, mitochondrial	ACAA2	26327373	4.02892e+07	4.27058e+07	4.25067e+07	2.92152e+07	3.51459e+07	1.55398e+07	1.82906e+07	1.76488e+07	1.57246e+07	6.46506e+06	9.82033e+06	12		24.6501	25.2639	25.3479	25.3412	24.8002	25.0669	23.8895	24.1246	24.0731	23.9065	22.6242	23.2273		1.87173	2.23235	2.1474	2.24124	1.82992	1.93503	1.60622	1.45651	1.74226	1.45315	0.696262	0.785755	1.66649				2.13665	2.5874	2.53124	2.61787
P36871	Phosphoglucomutase-1	PGM1	3.79193e+07	5.28752e+07	6.57327e+07	5.89571e+07	5.82254e+07	6.18417e+07	4.15285e+07	3.06563e+07	24953415	2.58009e+07	1.95059e+07	1.02198e+07	12		25.1764	25.6561	25.9701	25.8132	25.7951	25.8821	25.3076	24.8697	24.5727	24.6209	24.2174	23.2849		2.3981	2.62455	2.76958	2.71321	2.82485	2.75025	3.02435	2.20159	2.24193	2.16755	2.28944	0.84328	2.40406				2.73752	3.04198	3.26463	3.16916
Q02218	2-oxoglutarate dehydrogenase, mitochondrial	OGDH	1.1007e+07	2.76478e+07	14165744	7.06331e+06	2.65397e+07	2.48121e+07	1.02667e+07	1.20484e+07	1.53502e+07	2.2802e+07	2.31253e+07	1.56169e+07	12		23.3919	24.7207	23.7559	22.7519	24.6616	24.5645	23.2915	23.5223	23.8718	24.4427	24.463	23.8966		0.613586	1.68912	0.555379	-0.348034	1.69135	1.43272	1.00823	0.85425	1.54095	1.98929	2.535	1.45502	1.25141				0.700431	1.95777	0.654651	-0.40652
Q9ULC5	Long-chain-fatty-acid--CoA ligase 5	ACSL5	2.55244e+07	6.07315e+07	6.85345e+07	64874071	6.38226e+07	7.57368e+07	1.42001e+07	2.26786e+07	3.87036e+07	4.32515e+07	1.72846e+07	4.4442e+07	12		24.6054	25.8559	26.0303	25.9511	25.9276	26.1745	23.7594	24.4348	25.206	25.3662	24.043	25.4054		1.82704	2.8244	2.8298	2.85119	2.95727	3.04267	1.47615	1.76674	2.87516	2.91288	2.11501	2.96384	2.53685				2.08564	3.27361	3.33562	3.33032
Q14683	Structural maintenance of chromosomes protein 1A	SMC1A	1.43574e+08	1.59445e+08	2.36625e+08	3.57646e+08	4.56497e+07	3.79496e+08	2.53804e+07	1.12611e+08	1.65932e+08	1.78634e+08	1.16391e+07	2.45975e+08	12		27.0972	27.2485	27.818	28.414	25.4441	28.4995	24.5972	26.7468	27.306	27.4124	23.4725	27.8739		4.31889	4.21695	4.6175	5.31401	2.47381	5.36769	2.31397	4.07869	4.97521	4.95906	1.5445	5.43235	4.13439				4.93017	4.88764	5.44286	6.20701
Q16531	DNA damage-binding protein 1	DDB1	9.09153e+07	7.46936e+07	7.39451e+07	7.77713e+07	87330002	6.96551e+07	1.83053e+07	8.282e+07	4.64966e+07	4.76923e+07	9.94562e+06	3.48452e+07	12		26.438	26.1545	26.14	26.2127	26.38	26.0537	24.1258	26.3035	25.4706	25.5073	23.2456	25.0545		3.65969	3.12294	2.93943	3.11279	3.40968	2.9219	1.84252	3.63539	3.13982	3.05389	1.31766	2.61287	2.89738				4.17767	3.61964	3.46483	3.63588
P06737	Glycogen phosphorylase, liver form	PYGL	4.56145e+07	5.03696e+07	4.31431e+07	5.1242e+07	5.45845e+07	5.50839e+07	2.06828e+07	3.81884e+07	1.69312e+07	2.12071e+07	1.84656e+07	2.18357e+07	12		25.443	25.5861	25.3626	25.6108	25.702	25.7151	24.3019	25.1866	24.0132	24.338	24.1383	24.3802		2.66466	2.55451	2.1621	2.51088	2.73169	2.58331	2.01868	2.51854	1.68238	1.88468	2.21037	1.9386	2.28837				3.0418	2.9608	2.54857	2.93282
P31930	Cytochrome b-c1 complex subunit 1, mitochondrial	UQCRC1	2.71904e+08	311702152	3.41885e+08	2.9636e+08	2.85555e+08	1.37504e+08	5.39431e+07	2.52816e+08	7.08592e+07	1.49627e+08	59892832	1.90569e+08	12		28.0185	28.2156	28.3489	28.1428	28.0892	27.0349	25.6849	27.9135	26.0785	27.1568	25.8359	27.5057		5.24019	5.18405	5.14841	5.04283	5.1189	3.90307	3.40169	5.24542	3.74765	4.70343	3.90791	5.06416	4.64231				5.98187	6.00856	6.06866	5.89026
Q14974	Importin subunit beta-1	KPNB1	7.35273e+07	7.92451e+07	87606705	7.00017e+07	6.60843e+07	7.88269e+07	4.4419e+07	57570584	36667286	53277421	3.65282e+07	4.94309e+07	12		26.1318	26.2398	26.3845	26.0609	25.9778	26.2322	25.4047	25.7788	25.128	25.667	25.1225	25.5589		3.35344	3.20828	3.18401	2.96094	3.00751	3.10036	3.12143	3.11074	2.79719	3.21365	3.19454	3.11733	3.11412				3.82808	3.71855	3.75314	3.45851
P41250	Glycine--tRNA ligase	GARS	4.73239e+07	7.60024e+07	1.09809e+08	7.01575e+07	5.01091e+07	9.25103e+07	3.91932e+07	3.36783e+07	1.44892e+07	1.70947e+07	4.70609e+07	1.69164e+07	12		25.4961	26.1795	26.7104	26.0641	25.5786	26.4631	25.2241	25.0053	23.7885	24.027	25.488	24.0119		2.71773	3.148	3.5099	2.96415	2.60828	3.33129	2.94086	2.33723	1.45767	1.57368	3.56006	1.57034	2.64326				3.10239	3.64868	4.13728	3.46226
P49419	Alpha-aminoadipic semialdehyde dehydrogenase	ALDH7A1	8.12581e+07	9.49161e+07	9.50637e+07	8.2636e+07	8.60491e+07	9.39478e+07	5.45017e+07	8.05235e+07	3.99849e+07	6.38563e+07	3.88188e+07	5.6471e+07	12		26.276	26.5001	26.5024	26.3003	26.3587	26.4854	25.6998	26.2629	25.253	25.9283	25.2103	25.751		3.49768	3.46861	3.30187	3.20032	3.38836	3.35354	3.41655	3.59482	2.92215	3.47496	3.28228	3.30942	3.35088				3.99273	4.02028	3.89206	3.73812
P27708	CAD protein	CAD	1.96291e+07	2.49352e+07	2.6178e+07	3.18563e+07	2.86604e+07	2.29115e+07	7.75036e+06	1.90151e+07	1.74665e+07	2.38792e+07	8.65512e+06	2.87932e+07	12		24.2265	24.5717	24.6418	24.9251	24.7726	24.4496	22.8858	24.1806	24.0581	24.5093	23.0451	24.7792		1.44816	1.54014	1.44133	1.82513	1.80226	1.31775	0.602586	1.51255	1.72728	2.05589	1.11715	2.33764	1.56066				1.65313	1.7851	1.69895	2.13184
Q14839	Chromodomain-helicase-DNA-binding protein 4	CHD4	1.56138e+07	1.93034e+07	4.25393e+07	6.78925e+06	1.88999e+07	4.6272e+06	8959421	1.40584e+07	4.07654e+07	4.33206e+07	7.4681e+06	41330844	12		23.8963	24.2024	25.3423	22.6948	24.1719	22.1417	23.095	23.7449	25.2808	25.3685	22.8323	25.3007		1.11799	1.17082	2.14177	-0.405126	1.20158	-0.990112	0.811729	1.07684	2.95004	2.91518	0.904341	2.85913	1.31285				1.27622	1.35703	2.5246	-0.473206
Q92841	Probable ATP-dependent RNA helicase DDX17	DDX17	9.27808e+07	1.33265e+08	1.51288e+08	1.17688e+08	9.64985e+07	1.16514e+08	5.642e+07	7.6278e+07	6.54879e+07	7.03589e+07	5.49364e+07	6.45747e+07	12		26.4673	26.9897	27.1727	26.8104	26.524	26.7959	25.7497	26.1848	25.9647	26.0682	25.7113	25.9445		3.68899	3.95819	3.9722	3.71045	3.55371	3.66411	3.46646	3.51667	3.63392	3.61486	3.78329	3.50288	3.67214				4.21112	4.58773	4.68221	4.33398
P00338	L-lactate dehydrogenase A chain	LDHA	5.26874e+08	5.71735e+08	6.76364e+08	6.73008e+08	3.77965e+08	6.41543e+08	3.99238e+08	4.92381e+08	2.77256e+08	3.00459e+08	1.57923e+08	161056128	12		28.9729	29.0908	29.3332	29.326	28.4937	29.257	28.5727	28.8752	28.0466	28.1626	27.2346	27.263		6.19455	6.05923	6.1327	6.2261	5.52338	6.12515	6.28943	6.20711	5.71584	5.70923	5.30667	4.8214	5.85923				7.07131	7.02294	7.22889	7.27237
P17987	T-complex protein 1 subunit alpha	TCP1	9.0349e+07	1.07125e+08	1.07821e+08	1.09085e+08	1.15987e+08	1.04318e+08	6.40914e+07	7.96094e+07	5.07002e+07	5.54457e+07	4.31209e+07	6.12709e+07	12		26.429	26.6747	26.6841	26.7009	26.7894	26.6364	25.9336	26.2464	25.5955	25.7246	25.3619	25.8687		3.65067	3.64318	3.48354	3.60093	3.8191	3.50459	3.65038	3.57835	3.26468	3.2712	3.43392	3.42711	3.5273				4.16738	4.22262	4.1062	4.20605
P50225	Sulfotransferase 1A1	SULT1A1	3.43293e+07	5.08748e+07	5.5597e+07	4.32439e+07	5.54613e+07	6.73447e+07	2.64369e+07	2.85788e+07	1.77903e+07	2.31662e+07	1.43981e+07	1.03434e+08	12		25.0329	25.6004	25.7285	25.366	25.725	26.0051	24.656	24.7684	24.0846	24.4655	23.7794	26.6241		2.25461	2.56891	2.52798	2.26605	2.75468	2.87324	2.3728	2.10035	1.75379	2.01215	1.85141	4.18255	2.45988				2.57372	2.97749	2.97984	2.64685
Q99459	Cell division cycle 5-like protein	CDC5L	2.37131e+07	1.02115e+07	1.23747e+07	1.29759e+07	3.99305e+07	2.59109e+07	5.31286e+06	3.48894e+07	6.31965e+06	6.44304e+06	2.66046e+06	3.78026e+06	12		24.4992	23.2837	23.5609	23.6293	25.251	24.6271	22.3411	25.0563	22.5914	22.6193	21.3432	21.8501		1.72085	0.252147	0.360368	0.529385	2.28069	1.49523	0.0578135	2.38819	0.260611	0.165944	-0.584724	-0.591531	0.694582				1.96441	0.292251	0.424782	0.618346
Q16555	Dihydropyrimidinase-related protein 2	DPYSL2	6.56852e+07	1.0571e+08	1.05869e+08	9.24274e+07	9.44393e+07	8.04649e+07	9.72943e+07	7.75646e+07	1.28032e+07	1.26088e+07	6.22354e+07	9.49946e+06	12		25.9691	26.6555	26.6577	26.4618	26.4929	26.2619	26.5359	26.2089	23.61	23.5879	25.8912	23.1794		3.19073	3.624	3.45719	3.36187	3.52259	3.13003	4.25261	3.54081	1.2792	1.13456	3.96326	0.737831	2.93289				3.64234	4.20039	4.07514	3.92682
P45954	Short/branched chain specific acyl-CoA dehydrogenase, mitochondrial	ACADSB	1.52411e+08	160997360	176107932	1.41519e+08	2.01234e+08	1.55525e+08	1.64725e+08	1.36167e+08	1.13041e+08	1.28e+08	6.98816e+07	9.19276e+07	12		27.1834	27.2625	27.3919	27.0764	27.5843	27.2126	27.2955	27.0208	26.7523	26.9316	26.0584	26.454		4.40506	4.23092	4.19136	3.97648	4.614	4.08075	5.01224	4.35272	4.42147	4.47821	4.13044	4.01241	4.32551				5.02854	4.90384	4.94055	4.64471
Q15436	Protein transport protein Sec23A	SEC23A	2.9936e+07	3.7301e+07	3.20969e+07	3.50737e+07	5.10167e+06	3.34105e+07	2.3911e+07	4.17952e+07	3.79876e+07	3.56198e+07	2.35765e+07	3.02726e+07	12		24.8354	25.1527	24.9359	25.0639	22.2825	24.9938	24.5112	25.3168	25.179	25.0862	24.4908	24.8515		2.05705	2.12117	1.73541	1.96394	-0.687756	1.86198	2.22793	2.64875	2.84822	2.63281	2.56288	2.40993	2.03186				2.34819	2.45854	2.0456	2.29397
Q9Y2X3	Nucleolar protein 58	NOP58	7.07202e+07	9.73969e+07	1.03421e+08	1.06563e+08	8.13568e+07	9.70887e+07	4.98554e+07	6.5139e+07	6.46312e+07	6.0474e+07	6.20813e+07	7.33386e+07	12		26.0756	26.5374	26.624	26.6671	26.2778	26.5328	25.5712	25.957	25.9457	25.8498	25.8877	26.1281		3.29729	3.50583	3.42343	3.56718	3.30747	3.40098	3.288	3.28893	3.61492	3.39644	3.95969	3.68649	3.47805				3.76397	4.06343	4.03535	4.16663
Q15067	Peroxisomal acyl-coenzyme A oxidase 1	ACOX1	3.80824e+07	3.89861e+07	3.49327e+07	3.47036e+07	3.8357e+07	2.96806e+07	2.48439e+07	2.91801e+07	2.77322e+07	29242890	2.88708e+07	3.47865e+07	12		25.1826	25.2165	25.0581	25.0486	25.193	24.823	24.5664	24.7985	24.7251	24.8016	24.7831	25.052		2.40429	2.18492	1.85755	1.94863	2.22269	1.6912	2.28314	2.13039	2.39426	2.34822	2.85514	2.61044	2.24424				2.74459	2.53242	2.18958	2.2761
P30038	Delta-1-pyrroline-5-carboxylate dehydrogenase, mitochondrial	ALDH4A1	1.90277e+08	1.78505e+08	2.06018e+08	231970378	2.48826e+08	187665790	1.12652e+08	1.73651e+08	1.59559e+08	1.66241e+08	1.2612e+08	1.85523e+08	12		27.5035	27.4114	27.6182	27.7894	27.8906	27.4836	26.7473	27.3716	27.2495	27.3087	26.9102	27.467		4.72519	4.37985	4.41767	4.68942	4.92027	4.35177	4.46405	4.70353	4.91871	4.85533	4.98225	5.02544	4.70279				5.39398	5.07645	5.20731	5.47746
Q12788	Transducin beta-like protein 3	TBL3	1.25998e+07	1.23917e+07	1.27544e+07	1.01393e+07	1.34946e+06	1.39854e+07	4.09029e+06	1.36079e+07	1.00124e+07	1.21914e+07	3.47473e+06	1.48356e+07	12		23.5869	23.5629	23.6045	23.2735	20.364	23.7374	21.9638	23.6979	23.2553	23.5394	21.7285	23.8226		0.808565	0.53133	0.403964	0.173506	-2.60634	0.605596	-0.319474	1.02985	0.924487	1.086	-0.199498	1.38097	0.318247				0.923007	0.615837	0.47617	0.202663
P55196	Afadin	AFDN	4.9865e+07	8.94003e+07	8.61719e+07	7.52876e+07	1.06744e+08	5.2499e+07	8.72587e+06	2.34924e+07	5.17045e+06	6.20868e+06	6.0478e+06	6.01093e+06	12		25.5715	26.4138	26.3607	26.1659	26.6696	25.6458	23.0569	24.4857	22.3019	22.5659	22.528	22.5192		2.79319	3.38224	3.16019	3.06596	3.69929	2.51397	0.773623	1.8176	-0.0289428	0.112488	0.60001	0.0775734	1.8306				3.18853	3.92017	3.72506	3.58118
P32322	Pyrroline-5-carboxylate reductase 1, mitochondrial	PYCR1	6.33663e+07	8.59047e+07	1.03259e+08	9.19345e+07	9.01918e+07	9.53156e+07	6.22337e+07	7.07131e+07	8.32622e+07	1.00695e+08	7.59039e+07	1.00409e+08	12		25.9172	26.3562	26.6217	26.4541	26.4265	26.5062	25.8912	26.0755	26.3112	26.5854	26.1777	26.5813		3.13888	3.32469	3.42117	3.35416	3.4562	3.37439	3.60795	3.40739	3.98036	4.13206	4.2497	4.13973	3.63222				3.58315	3.85348	4.03269	3.91781
Q9BWD1	Acetyl-CoA acetyltransferase, cytosolic	ACAT2	1.43927e+08	1.99791e+08	2.78498e+08	2.05786e+08	1.30633e+08	2.39571e+08	8.75902e+07	1.27034e+08	68108213	8.6284e+07	2.31552e+07	3.96328e+07	12		27.1008	27.5739	28.0531	27.6166	26.9609	27.8359	26.3843	26.9206	26.0213	26.3626	24.4648	25.2402		4.32243	4.54238	4.85257	4.51662	3.99065	4.70406	4.10102	4.25256	3.69052	3.90922	2.53687	2.79861	4.01813				4.93421	5.26483	5.71994	5.27562
P30048	Thioredoxin-dependent peroxide reductase, mitochondrial	PRDX3	1.9055e+08	1.95548e+08	2.64067e+08	2.34648e+08	2.16566e+08	2.1015e+08	151252645	1.6988e+08	1.64705e+08	1.33699e+08	8.04895e+07	1.19712e+08	12		27.5056	27.5429	27.9763	27.8059	27.6902	27.6468	27.1724	27.3399	27.2953	26.9944	26.2623	26.835		4.72726	4.51141	4.7758	4.70598	4.71993	4.51502	4.88914	4.67185	4.9645	4.54105	4.33433	4.39341	4.64581				5.39634	5.22894	5.62946	5.4968
Q9NVP1	ATP-dependent RNA helicase DDX18	DDX18	2.30395e+07	3.10955e+07	2.55256e+07	36837493	8.21584e+07	3.41061e+07	3.03396e+07	2.49466e+07	2.76767e+07	2.83001e+07	2.88433e+07	4.53768e+07	12		24.4576	24.8902	24.6054	25.1347	26.2919	25.0235	24.8547	24.5723	24.7222	24.7543	24.7817	25.4355		1.67927	1.85866	1.40492	2.03472	3.32161	1.8917	2.57145	1.90425	2.39137	2.30094	2.85376	2.99387	2.26721				1.91695	2.15428	1.65604	2.37665
P31689	DnaJ homolog subfamily A member 1	DNAJA1	6.00392e+07	7.16986e+07	5.45005e+07	6.7211e+07	7.13583e+07	6.20334e+07	2.88065e+07	4.76933e+07	2.77409e+07	3.06837e+07	2.43162e+07	3.44e+07	12		25.8394	26.0954	25.6998	26.0022	26.0886	25.8865	24.7799	25.5073	24.7255	24.871	24.5354	25.0359		3.06107	3.0639	2.49924	2.90225	3.11828	2.75472	2.49665	2.83919	2.39471	2.4176	2.60745	2.59432	2.72912				3.49433	3.55121	2.94597	3.38996
O60716	Catenin delta-1	CTNND1	31645956	1.46146e+07	1.88395e+07	1.69168e+07	1.82026e+07	1.74146e+07	6.71112e+06	2.75637e+07	2.16854e+07	2.61409e+07	11899192	2.96699e+07	12		24.9155	23.8009	24.1673	24.012	24.1176	24.0538	22.6781	24.7163	24.3702	24.6398	23.5044	24.8225		2.13719	0.769369	0.966737	0.912004	1.14735	0.921971	0.394878	2.04818	2.03942	2.18644	1.57639	2.38091	1.45674				2.43968	0.891735	1.13954	1.06526
P00505	Aspartate aminotransferase, mitochondrial	GOT2	81353300	1.53491e+08	1.95685e+08	146487071	1.24262e+08	1.55626e+08	8.46639e+07	8.19565e+07	7.25706e+07	7.56706e+07	4.13834e+07	3.40782e+07	12		26.2777	27.1936	27.544	27.1262	26.8888	27.2135	26.3352	26.2884	26.1129	26.1732	25.3025	25.0223		3.49937	4.16204	4.34343	4.02625	3.91852	4.08169	4.052	3.62027	3.78208	3.71986	3.37458	2.58076	3.7634				3.99466	4.824	5.1198	4.70285
P49748	Very long-chain specific acyl-CoA dehydrogenase, mitochondrial	ACADVL	5.36128e+07	7.68067e+07	97076140	8.5184e+07	9.34509e+07	8.79911e+07	3.84685e+07	5.09219e+07	4.10933e+07	5.10596e+07	3.14039e+07	4.12431e+07	12		25.6761	26.1947	26.5326	26.3441	26.4777	26.3909	25.1972	25.6018	25.2924	25.6057	24.9044	25.2976		2.89774	3.16319	3.33209	3.24413	3.50741	3.25903	2.91393	2.93369	2.9616	3.15231	2.97647	2.85607	3.09981				3.30788	3.66629	3.92768	3.78929
Q06830	Peroxiredoxin-1	PRDX1	4.19133e+08	5.22686e+08	6.59549e+08	5.48217e+08	5.82504e+08	5.63344e+08	2.79982e+08	4.28029e+08	2.80981e+08	2.97928e+08	1.30111e+08	1.84248e+08	12		28.6428	28.9614	29.2969	29.0302	29.1177	29.0694	28.0608	28.6731	28.0659	28.1504	26.9552	27.4571		5.8645	5.92983	6.09638	5.93022	6.1474	5.93762	5.77751	6.00505	5.73509	5.69702	5.0272	5.01549	5.76361				6.69455	6.87295	7.18608	6.92678
P36578	60S ribosomal protein L4	RPL4	158247390	191286384	1.87748e+08	1.88833e+08	150371089	1.63688e+08	1.04192e+08	1.58714e+08	1.08597e+08	1.35424e+08	7.1317e+07	1.15736e+08	12		27.2376	27.5112	27.4842	27.4925	27.164	27.2864	26.6347	27.2418	26.6944	27.0129	26.0877	26.7863		4.45927	4.47962	4.2837	4.39259	4.19366	4.15455	4.35142	4.57376	4.36361	4.55954	4.15977	4.34468	4.35968				5.09043	5.19209	5.04939	5.13075
Q7Z406	Myosin-14	MYH14	1.22275e+07	1.43643e+07	1.24259e+07	1.47384e+07	1.05872e+07	1.45758e+07	7.1471e+06	1.21779e+07	6.59263e+06	1.11419e+07	1.02084e+07	9.79227e+06	12		23.5436	23.776	23.5668	23.8131	23.3358	23.7971	22.7689	23.5378	22.6524	23.4095	23.2832	23.2232		0.765289	0.744441	0.366323	0.713125	0.365517	0.665255	0.485682	0.869677	0.321621	0.956129	1.35528	0.781628	0.699164				0.873606	0.862843	0.431801	0.832963
P60174	Triosephosphate isomerase	TPI1	3.63219e+08	4.21043e+08	4.91451e+08	5.19366e+08	3.52229e+08	4.9712e+08	3.37996e+08	3.51523e+08	2.11993e+08	2.1596e+08	7.39626e+07	1.30178e+08	12		28.4363	28.6494	28.8725	28.9522	28.3919	28.889	28.3324	28.389	27.6594	27.6862	26.1403	26.9559		5.65793	5.61785	5.67195	5.85223	5.42164	5.7572	6.04919	5.72095	5.32864	5.23282	4.21232	4.51433	5.41976				6.45874	6.51136	6.68578	6.83567
Q14203	Dynactin subunit 1	DCTN1	7.81878e+06	1.20409e+07	1.40956e+07	1.00667e+07	1.16283e+07	6.03682e+07	6.03082e+07	7.69627e+06	5.11818e+06	4.87403e+06	5.82119e+07	3.20221e+06	12		22.8985	23.5214	23.7487	23.2631	23.4711	25.8473	25.8459	22.8757	22.2872	22.2167	25.7948	21.6106		0.12018	0.489895	0.548218	0.163142	0.500845	2.71546	3.56261	0.207639	-0.0436018	-0.236683	3.86684	-0.830949	0.921966				0.13719	0.567811	0.646209	0.190557
Q9HCC0	Methylcrotonoyl-CoA carboxylase beta chain, mitochondrial	MCCC2	3.25847e+07	3.87153e+07	2.68017e+07	2.54826e+07	2.11821e+07	1.86028e+07	2.20789e+07	3.117e+07	2.93599e+07	2.27322e+07	2.5787e+07	1.80704e+07	12		24.9577	25.2064	24.6758	24.603	24.3363	24.149	24.3962	24.8937	24.8073	24.4382	24.6201	24.1071		2.17936	2.17486	1.4753	1.50306	1.36605	1.0172	2.11292	2.22557	2.47654	1.98487	2.69217	1.66554	1.90612				2.48782	2.52076	1.739	1.75565
O00425	Insulin-like growth factor 2 mRNA-binding protein 3	IGF2BP3	1.54183e+07	1.43513e+07	3.39423e+07	2.65293e+07	52445590	2.91165e+07	9.3025e+06	1.29691e+07	9.86539e+06	1.27321e+07	1.03225e+07	1.096e+07	12		23.8781	23.7747	25.0166	24.6611	25.6443	24.7953	23.1492	23.6286	23.2339	23.602	23.2993	23.3857		1.0998	0.743134	1.81606	1.56113	2.67402	1.66351	0.865942	0.960488	0.903143	1.1486	1.37132	0.944161	1.31261				1.25547	0.861327	2.14067	1.82348
P61978	Heterogeneous nuclear ribonucleoprotein K	HNRNPK	1.82465e+08	2.17432e+08	2.55012e+08	2.37005e+08	2.04298e+08	2.02418e+08	1.21737e+08	1.41527e+08	8.7935e+07	1.08538e+08	9.2223e+07	9.62029e+07	12		27.443	27.696	27.926	27.8203	27.6061	27.5928	26.8592	27.0765	26.3899	26.6936	26.4586	26.5196		4.66471	4.66445	4.72547	4.72039	4.6358	4.46094	4.57595	4.40841	4.05913	4.24026	4.53065	4.07799	4.48035				5.32494	5.40632	5.57012	5.51364
Q7L014	Probable ATP-dependent RNA helicase DDX46	DDX46	8.10407e+06	1.10871e+07	1.15839e+07	2.1222e+07	8.65663e+06	7038817	5.76031e+06	7.39411e+06	7.83107e+06	6.79493e+06	5.1149e+06	6.50474e+06	12		22.9502	23.4024	23.4656	24.3391	23.0454	22.7469	22.4577	22.8179	22.9008	22.696	22.2863	22.6331		0.171882	0.370839	0.265093	1.23911	0.0750803	-0.38492	0.17447	0.149856	0.569975	0.24266	0.358306	0.191477	0.285319				0.19621	0.42982	0.312477	1.44734
P30837	Aldehyde dehydrogenase X, mitochondrial	ALDH1B1	9.24089e+07	1.26443e+08	1.80608e+08	1.40142e+08	1.61371e+08	1.22752e+08	6.41359e+07	8.53997e+07	8.24054e+07	7.44864e+07	6.30317e+07	6.43584e+07	12		26.4615	26.9139	27.4283	27.0623	27.2658	26.8712	25.9346	26.3477	26.2962	26.1505	25.9096	25.9396		3.6832	3.88238	4.22776	3.96237	4.29551	3.73935	3.65138	3.67964	3.96543	3.69711	3.98161	3.49804	3.85531				4.20451	4.49986	4.98345	4.62823
Q15418	Ribosomal protein S6 kinase alpha-1	RPS6KA1	1.90788e+07	1.17107e+07	3.26088e+07	14644233	1.34358e+07	1.05506e+07	1.11824e+07	1.03385e+08	1.56617e+08	1.74965e+08	1.2283e+07	1.27916e+07	12		24.1855	23.4813	24.9588	23.8038	23.6796	23.3308	23.4147	26.6234	27.2227	27.3825	23.5502	23.6087		1.40714	0.44979	1.75823	0.703882	0.70929	0.199	1.13148	3.95536	4.89186	4.92913	1.62219	1.1671	1.91037				1.6063	0.521327	2.07251	0.822166
O43491	Band 4.1-like protein 2	EPB41L2	1.91159e+07	2.5787e+07	2.32982e+07	2.72183e+07	3.11696e+07	2.40884e+07	43317586	3.31306e+07	2.19887e+07	2.77799e+07	4.58915e+07	2.16323e+07	12		24.1883	24.6201	24.4737	24.6981	24.8936	24.5218	25.3684	24.9817	24.3903	24.7275	25.4517	24.3667		1.40994	1.5886	1.27319	1.59813	1.92334	1.39002	3.0852	2.31357	2.05946	2.27417	3.52375	1.9251	2.03037				1.60949	1.84126	1.50077	1.86668
P01009	Alpha-1-antitrypsin	SERPINA1	8.74167e+07	9.48497e+07	1.67665e+08	1.47876e+08	1.47052e+08	1.88038e+08	2.52724e+07	4.41253e+07	3.7249e+07	5.2791e+07	3.58994e+07	9.33476e+07	12		26.3814	26.4991	27.321	27.1398	27.1318	27.4865	24.5911	25.3951	25.1507	25.6538	25.0975	26.4761		3.60307	3.4676	4.12048	4.03987	4.16146	4.35463	2.30781	2.72701	2.8199	3.20042	3.16949	4.03453	3.50052				4.11304	4.01911	4.857	4.71875
Q9H583	HEAT repeat-containing protein 1	HEATR1	1.64991e+07	2.46695e+07	2.48424e+07	2.65361e+07	1.59192e+07	1.99909e+07	4.61736e+06	1.24253e+07	9.76539e+06	1.0344e+07	3.95346e+06	1.02917e+07	12		23.9759	24.5562	24.5663	24.6615	23.9243	24.2528	22.1386	23.5668	23.2192	23.3023	21.9147	23.295		1.19755	1.52468	1.36578	1.56151	0.953967	1.12102	-0.14461	0.898683	0.888444	0.848922	-0.0132843	0.853391	0.921337				1.36705	1.76718	1.6099	1.82391
P50454	Serpin H1	SERPINH1	1.10662e+08	1.4217e+08	1.58323e+08	1.27611e+08	1.39983e+08	1.43698e+08	6.3414e+07	9.11541e+07	5.53124e+07	7.59792e+07	5.09229e+07	7.39788e+07	12		26.7216	27.083	27.2383	26.9272	27.0607	27.0985	25.9183	26.4418	25.7211	26.1791	25.6018	26.1406		3.94326	4.05151	4.03778	3.82723	4.09038	3.96664	3.63505	3.77372	3.3903	3.72574	3.67384	3.69902	3.81787				4.50137	4.69589	4.75951	4.47038
Q9UHD8	Septin-9	SEPTIN9	10143673	2.6783e+07	22434091	2.85585e+07	1.20539e+07	2.76411e+07	1.27877e+07	1.65539e+07	1.16846e+07	1.36595e+07	1.01444e+07	1.27861e+07	12		23.2741	24.6748	24.4192	24.7674	23.523	24.7203	23.6083	23.9807	23.4781	23.7034	23.2742	23.6081		0.495744	1.64328	1.21867	1.66747	0.552698	1.58849	1.32501	1.31257	1.1473	1.25004	1.34622	1.16649	1.22616				0.565911	1.90463	1.4365	1.94768
Q99497	Protein/nucleic acid deglycase DJ-1	PARK7	1.87267e+08	3.63977e+08	5.09156e+08	4.15329e+08	2.526e+08	4.38782e+08	1.63614e+08	2.85003e+08	1.79286e+08	1.84569e+08	5.2233e+07	1.11781e+08	12		27.4805	28.4393	28.9235	28.6297	27.9123	28.7089	27.2857	28.0864	27.4177	27.4596	25.6385	26.7361		4.70219	5.40773	5.72301	5.52973	4.94199	5.57711	5.00247	5.41831	5.08688	5.00622	3.71049	4.29452	5.03339				5.36772	6.26782	6.74597	6.45898
Q13423	NAD(P) transhydrogenase, mitochondrial	NNT	3.11386e+07	2.31166e+07	2.7211e+07	2.77889e+07	3.139e+07	25850887	4.60924e+07	2.85285e+07	3.56217e+07	2.58223e+07	7.09934e+07	2.31142e+07	12		24.8922	24.4624	24.6977	24.728	24.9038	24.6237	25.458	24.7659	25.0863	24.6221	26.0812	24.4623		2.11387	1.43089	1.49716	1.62806	1.93351	1.49189	3.17478	2.09781	2.75545	2.16875	4.15321	2.02069	2.20551				2.41306	1.65847	1.76477	1.90165
P55060	Exportin-2	CSE1L	1.34359e+09	1.61624e+09	9.02582e+08	8.49135e+08	1.71725e+09	8.2371e+08	5.26565e+08	1.2924e+09	1.0116e+09	1.20294e+09	4.02554e+08	9.49197e+08	12		30.3234	30.59	29.7495	29.6614	30.6774	29.6176	28.972	30.2674	29.914	30.1639	28.5846	29.8221		7.54512	7.55845	6.54896	6.56147	7.70716	6.48574	6.68879	7.59931	7.58319	7.71055	6.65664	7.38055	7.16883				8.61303	8.7606	7.71955	7.6641
Q8WUM4	Programmed cell death 6-interacting protein	PDCD6IP	1.99346e+07	4.84455e+07	7.54608e+07	4.42505e+07	3.86836e+07	47023695	2.66331e+07	2.15575e+07	1.16011e+08	1.3166e+08	4.35309e+07	2.78284e+07	12		24.2488	25.5299	26.1692	25.3992	25.2052	25.4869	24.6667	24.3617	26.7897	26.9722	25.3755	24.7301		1.47044	2.49832	2.9687	2.29924	2.23492	2.35506	2.38347	1.6936	4.45888	4.51888	3.44757	2.28847	2.71813				1.67856	2.89567	3.49934	2.68562
P07910	Heterogeneous nuclear ribonucleoproteins C1/C2	HNRNPC	3.11847e+08	4.16271e+08	4.35131e+08	4.09097e+08	3.67806e+08	2.89207e+08	2.33269e+08	2.88248e+08	2.50398e+08	2.44022e+08	2.02411e+08	2.20781e+08	12		28.2163	28.6329	28.6969	28.6079	28.4544	28.1075	27.7974	28.1027	27.8996	27.8624	27.5927	27.718		5.43793	5.60141	5.49635	5.50792	5.48408	4.9757	5.51418	5.43465	5.56885	5.40907	5.66474	5.27646	5.44761				6.2076	6.4923	6.4788	6.43351
P35221	Catenin alpha-1	CTNNA1	7.55247e+06	3.54786e+07	4.00414e+07	4.41122e+07	2.84667e+07	9.51889e+07	1.99836e+07	1.15948e+07	8.317e+06	8.1859e+06	1.43629e+07	9.98459e+06	12		22.8485	25.0804	25.255	25.3947	24.7628	26.5043	24.2523	23.467	22.9876	22.9647	23.7758	23.2513		0.0701851	2.0489	2.05446	2.29473	1.79248	3.37247	1.96907	0.798886	0.65683	0.511344	1.84788	0.809687	1.51891				0.0801189	2.37478	2.42169	2.68035
Q13151	Heterogeneous nuclear ribonucleoprotein A0	HNRNPA0	1.20036e+08	4.50692e+07	4.55608e+07	4.80676e+07	5.09316e+07	4.90322e+07	3.64962e+07	1.0883e+08	9.38801e+07	1.09808e+08	2.60157e+07	1.12385e+08	12		26.8389	25.4256	25.4413	25.5186	25.6021	25.5472	25.1212	26.6975	26.4843	26.7104	24.6329	26.7439		4.06056	2.3941	2.24077	2.41861	2.63176	2.4154	2.838	4.02941	4.15351	4.25704	2.70491	4.30229	3.20386				4.63528	2.77487	2.64129	2.82505
Q14008	Cytoskeleton-associated protein 5	CKAP5	5.37085e+06	6.86819e+06	1.1478e+07	7.28648e+06	7.51703e+06	4.40895e+07	1.40889e+07	21922169	2.13124e+07	2.33336e+07	2.45247e+07	2.79441e+07	12		22.3567	22.7115	23.4524	22.7968	22.8417	25.3939	23.7481	24.3859	24.3452	24.4759	24.5477	24.736		-0.421613	-0.320042	0.251845	-0.303157	-0.128562	2.26211	1.46481	1.7178	2.01439	2.02254	2.61977	2.29446	1.12286				-0.481287	-0.370943	0.296861	-0.354101
P00390	Glutathione reductase, mitochondrial	GSR	7.15234e+07	7.48418e+07	7.46572e+07	8.11736e+07	5.08119e+07	7.12566e+07	35751144	5.57085e+07	2.4415e+07	2.96053e+07	1.42476e+07	1.62555e+07	12		26.0919	26.1573	26.1538	26.2745	25.5987	26.0865	25.0915	25.7314	24.5413	24.8194	23.7642	23.9544		3.31358	3.1258	2.95325	3.17456	2.62837	2.9547	2.80824	3.0633	2.21046	2.36599	1.83625	1.51284	2.66228				3.78257	3.62295	3.48113	3.70803
Q13451	Peptidyl-prolyl cis-trans isomerase FKBP5	FKBP5	3.20174e+07	3.12244e+07	2.35666e+07	3.02689e+07	2.72838e+07	21588015	1.92423e+07	2.44575e+07	2.63774e+07	2.681e+07	2.61321e+07	4.07624e+07	12		24.9324	24.8962	24.4902	24.8513	24.7015	24.3637	24.1978	24.5438	24.6528	24.6763	24.6393	25.2807		2.15402	1.86463	1.28972	1.75139	1.73125	1.23191	1.91453	1.87569	2.322	2.2229	2.71135	2.83915	1.99238				2.45889	2.16119	1.52025	2.0457
P09972	Fructose-bisphosphate aldolase C	ALDOC	1.29966e+08	1.28143e+08	1.8476e+08	1.58103e+08	1.4079e+08	1.14198e+08	1.0359e+08	1.66096e+08	1.06333e+08	1.34249e+08	4.2012e+07	6.02217e+07	12		26.9536	26.9332	27.4611	27.2363	27.069	26.767	26.6263	27.3074	26.664	27.0003	25.3243	25.8438		4.17523	3.90164	4.26055	4.13634	4.09868	3.63515	4.34307	4.63935	4.33321	4.54697	3.39633	3.4022	4.07239				4.76618	4.52218	5.0221	4.83144
Q86TG7	Retrotransposon-derived protein PEG10	PEG10	2.27712e+07	27533007	2.97136e+07	2.67485e+07	2.26882e+07	3.04404e+07	2.91175e+07	32421870	1.41154e+07	1.93928e+07	12954415	2.28395e+07	12		24.4407	24.7147	24.8246	24.673	24.4354	24.8595	24.7954	24.9505	23.7508	24.209	23.6269	24.445		1.66238	1.68312	1.62409	1.57301	1.46514	1.72766	2.51214	2.28237	1.41997	1.75565	1.69897	2.00345	1.784				1.89766	1.95081	1.91439	1.83735
Q5JPE7	Nodal modulator 2	NOMO2	2.5844e+07	3.0936e+07	2.77389e+07	3.31073e+07	6.52382e+06	2.02195e+07	8.52173e+06	1.17735e+07	6.61019e+06	8.12933e+06	5.5126e+06	6.11456e+06	12		24.6233	24.8828	24.7254	24.9806	22.6373	24.2692	23.0227	23.489	22.6563	22.9547	22.3943	22.5438		1.84499	1.85124	1.52488	1.8807	-0.333008	1.13742	0.739471	0.820955	0.325458	0.501339	0.466333	0.102232	0.905168				2.10613	2.14568	1.79745	2.19674
P13489	Ribonuclease inhibitor	RNH1	4.75657e+07	3.96696e+07	4.43487e+07	3.96246e+07	5.99058e+07	3.43047e+07	3.70214e+07	3.86133e+07	3.51248e+07	4.33142e+07	3.07456e+07	4.6235e+07	12		25.5034	25.2415	25.4024	25.2399	25.8362	25.0319	25.1419	25.2026	25.066	25.3683	24.8739	25.4625		2.72508	2.20999	2.20187	2.13995	2.8659	1.90008	2.85861	2.5345	2.73519	2.91497	2.94591	3.0209	2.58775				3.11079	2.56148	2.59544	2.49956
P02671	Fibrinogen alpha chain	FGA	2.00271e+07	4.81448e+06	1.24895e+07	1.27689e+07	1.76551e+07	3.85421e+07	5.7866e+07	3.03813e+07	2.2615e+07	3.59477e+07	7.75386e+07	2.68155e+07	12		24.2555	22.1989	23.5742	23.6061	24.0736	25.1999	25.7862	24.8567	24.4308	25.0994	26.2084	24.6766		1.47712	-0.832591	0.373688	0.506186	1.10329	2.06811	3.50297	2.18859	2.09997	2.64603	4.28044	2.23498	1.80407				1.68619	-0.965013	0.440482	0.591248
Q04637	Eukaryotic translation initiation factor 4 gamma 1	EIF4G1	3.89426e+07	5.78481e+07	47073875	4.47278e+07	3.56793e+07	4.85668e+07	1.10418e+07	3.22022e+07	1.20945e+07	1.37276e+07	1.15667e+07	1.06132e+07	12		25.2148	25.7858	25.4884	25.4147	25.0886	25.5335	23.3965	24.9407	23.5278	23.7106	23.4635	23.3394		2.43652	2.75423	2.2879	2.31472	2.11829	2.40165	1.11322	2.27257	1.19704	1.25721	1.53551	0.897768	1.88222				2.78137	3.19228	2.69685	2.7037
P31040	Succinate dehydrogenase [ubiquinone] flavoprotein subunit, mitochondrial	SDHA	4.97067e+07	8.34618e+07	8.98812e+07	9.14733e+07	5.77979e+07	7.04404e+07	3.3273e+07	3.76667e+07	3.33439e+07	3.93537e+07	2.97591e+07	4.70956e+07	12		25.5669	26.3146	26.4215	26.4468	25.7845	26.0699	24.9878	25.1668	24.9909	25.23	24.8268	25.4891		2.78861	3.28307	3.22099	3.3469	2.81422	2.93808	2.7046	2.4987	2.66012	2.77663	2.89886	3.04751	2.91486				3.1833	3.80524	3.79673	3.90933
Q9UM54	Unconventional myosin-VI	MYO6	9.99642e+06	1.00836e+07	1.24835e+08	7.60799e+06	8.88213e+06	1.01667e+07	4.99339e+06	9.485e+06	7.72819e+06	5.70388e+06	6.01751e+06	1.16324e+07	12		23.253	23.2655	26.8954	22.8591	23.0825	23.2774	22.2516	23.1772	22.8817	22.4435	22.5207	23.4716		0.474648	0.233964	3.69492	-0.240864	0.11218	0.14553	-0.031657	0.509127	0.550896	-0.00985325	0.592766	1.03006	0.588476				0.541829	0.271175	4.35537	-0.281341
O95163	Elongator complex protein 1	ELP1	2.54357e+07	1.80991e+07	3.46796e+07	2.977e+07	3.81165e+07	1.82498e+07	2.19224e+07	1.64355e+07	1760153	2.04323e+06	1.99117e+07	1.15558e+06	12		24.6003	24.1094	25.0476	24.8274	25.1839	24.1214	24.3859	23.9703	20.7473	20.9624	24.2471	20.1402		1.82202	1.07788	1.84706	1.72741	2.21362	0.989555	2.10266	1.30222	-1.58353	-1.49095	2.31914	-2.3014	0.835474				2.0799	1.24931	2.17721	2.01769
O94826	Mitochondrial import receptor subunit TOM70	TOMM70	4.02493e+07	54458439	9.09523e+07	5.60086e+07	3.92699e+07	4.97156e+07	2.20495e+07	3.47766e+07	2.81322e+07	3.08854e+07	2.21432e+07	2.9341e+07	12		25.2625	25.6987	26.4386	25.7391	25.2269	25.5672	24.3942	25.0516	24.7457	24.8804	24.4004	24.8064		2.48413	2.66711	3.23808	2.6392	2.25663	2.43537	2.111	2.38352	2.41492	2.42706	2.47239	2.36483	2.49119				2.83573	3.09131	3.81688	3.0827
P30086	Phosphatidylethanolamine-binding protein 1	PEBP1	2.48155e+08	4.06467e+08	4.37134e+08	3.52882e+08	4.15248e+08	3.84154e+08	1.98473e+08	2.45009e+08	1.00678e+08	1.00271e+08	3.79818e+07	5.80951e+07	12		27.8867	28.5986	28.7035	28.3946	28.6294	28.5171	27.5644	27.8683	26.5852	26.5793	25.1788	25.7919		5.10833	5.56702	5.50298	5.29466	5.6591	5.38529	5.28112	5.20017	4.25437	4.12596	3.25084	3.35033	4.83168				5.83136	6.45244	6.48661	6.18441
P42345	Serine/threonine-protein kinase mTOR	MTOR	1.3294e+07	1.49925e+07	1.71502e+07	1.83438e+07	1.77325e+07	1.08703e+07	4.40051e+06	1.35487e+07	8.30506e+06	1.20954e+07	7.09316e+06	9.91099e+06	12		23.6643	23.8377	24.0317	24.1288	24.0799	23.3739	22.0692	23.6916	22.9856	23.528	22.758	23.2406		0.885934	0.806196	0.831198	1.02884	1.1096	0.242072	-0.214005	1.02356	0.654757	1.07459	0.830028	0.799014	0.755982				1.01133	0.934419	0.979771	1.20174
Q8TD30	Alanine aminotransferase 2	GPT2	2.26761e+07	4.03429e+07	6.43555e+07	7.39718e+07	5.2207e+07	4.16872e+07	8.62443e+06	2.12627e+07	1.28946e+07	1.32336e+07	1.48024e+07	1.10758e+07	12		24.4347	25.2658	25.9396	26.1405	25.6377	25.3131	23.04	24.3418	23.6203	23.6577	23.8193	23.4009		1.65634	2.23427	2.73904	3.04052	2.66745	2.18128	0.756754	1.67373	1.28946	1.20433	1.89136	0.959322	1.85782				1.89077	2.58963	3.22863	3.55147
P13674	Prolyl 4-hydroxylase subunit alpha-1	P4HA1	1.47002e+08	1.65884e+08	2.46611e+08	1.69587e+08	1.92593e+08	2.068e+08	4.26579e+07	1.34902e+08	4.53541e+07	4.9917e+07	4.12112e+07	5.71793e+07	12		27.1313	27.3056	27.8777	27.3375	27.521	27.6237	25.3463	27.0073	25.4347	25.573	25.2965	25.769		4.35293	4.27406	4.67714	4.23751	4.55068	4.49184	3.06307	4.33925	3.10393	3.11966	3.36857	3.32741	3.90884				4.96903	4.95383	5.51316	4.9496
O14980	Exportin-1	XPO1	5.8514e+07	7.13643e+07	5.91495e+07	7.72325e+07	6.61959e+07	6.70428e+07	3.15998e+07	41691519	4.77648e+07	4.70857e+07	2.91819e+07	5.68667e+07	12		25.8023	26.0887	25.8179	26.2027	25.9802	25.9986	24.9134	25.3133	25.5094	25.4888	24.7986	25.7611		3.02395	3.05716	2.61734	3.10276	3.00994	2.86676	2.63017	2.64516	3.17864	3.03542	2.8706	3.3195	2.94645				3.45195	3.54339	3.08517	3.62416
O75116	Rho-associated protein kinase 2	ROCK2	1.4881e+07	2.57176e+07	2.25573e+07	2.00396e+07	2.86301e+07	2.01127e+07	1.95412e+07	1.50853e+07	1.46068e+07	1.51248e+07	1.63521e+07	1.06931e+07	12		23.827	24.6163	24.4271	24.2563	24.771	24.2616	24.22	23.8466	23.8001	23.8504	23.963	23.3502		1.04864	1.58471	1.22657	1.1564	1.80073	1.12978	1.93677	1.17855	1.46934	1.39705	2.035	0.908595	1.40601				1.19706	1.83676	1.44581	1.35073
Q14166	Tubulin--tyrosine ligase-like protein 12	TTLL12	1.8205e+07	1.81906e+07	2.08108e+07	1.98467e+07	1.76505e+07	1.95003e+07	1.15744e+07	1.62309e+07	10189981	1.43646e+07	1.00951e+07	1.19761e+07	12		24.1178	24.1167	24.3108	24.2424	24.0732	24.217	23.4644	23.9522	23.2806	23.776	23.2672	23.5137		1.3395	1.08515	1.11031	1.14244	1.10291	1.08517	1.18118	1.28415	0.949846	1.32264	1.33919	1.07207	1.16788				1.52909	1.25774	1.30877	1.33443
Q29RF7	Sister chromatid cohesion protein PDS5 homolog A	PDS5A	2.97763e+06	6.13695e+06	1.47727e+07	5.75315e+06	2.86817e+06	5.23071e+06	2.8704e+06	2.22028e+06	1.1891e+06	3.04108e+06	3.6972e+06	1.49348e+06	12		21.5057	22.5491	23.8164	22.4559	21.4517	22.3186	21.4528	21.0823	20.1814	21.5362	21.818	20.5103		-1.2726	-0.48245	0.615908	-0.644027	-1.5186	-0.813246	-0.830423	-1.58578	-2.14937	-0.917212	-0.109969	-1.93133	-0.969924				-1.45272	-0.559183	0.725998	-0.752253
P55786	Puromycin-sensitive aminopeptidase	NPEPPS	3.63569e+07	4.08016e+07	5.88591e+07	4.61088e+07	4.75981e+07	5.2386e+07	2.22131e+07	2.91013e+07	1.44625e+07	1.75329e+07	7.90117e+06	1.01155e+07	12		25.1157	25.2821	25.8108	25.4585	25.5044	25.6427	24.4049	24.7946	23.7858	24.0636	22.9136	23.2701		2.33739	2.25058	2.61024	2.35859	2.53411	2.51086	2.12167	2.12649	1.45501	1.6102	0.985665	0.82848	1.97744				2.66822	2.60853	3.07681	2.75494
Q13428	Treacle protein	TCOF1	3.7512e+07	30115975	2.58466e+07	3.10088e+07	3.90649e+07	2.25852e+07	1.31113e+07	3.90409e+07	3.40709e+07	4.10685e+07	7.83906e+06	2.71444e+07	12		25.1608	24.844	24.6235	24.8862	25.2194	24.4289	23.6443	25.2185	25.022	25.2915	22.9022	24.6942		2.38252	1.81249	1.42295	1.78623	2.24908	1.29705	1.36106	2.55039	2.69124	2.83816	0.97428	2.25257	1.96817				2.71973	2.10076	1.67729	2.0864
P46777	60S ribosomal protein L5	RPL5	1.59591e+08	2.0325e+08	2.15273e+08	2.02531e+08	1.54011e+08	1.8965e+08	8.06417e+07	1.18758e+08	9.88121e+07	1.05192e+08	7.83867e+07	1.02388e+08	12		27.2498	27.5987	27.6816	27.5936	27.1985	27.4988	26.265	26.8235	26.5582	26.6485	26.2241	26.6095		4.47147	4.56714	4.48107	4.49362	4.22816	4.36694	3.98178	4.15536	4.22738	4.19509	4.29614	4.16789	4.30267				5.10435	5.29353	5.28204	5.24876
Q1KMD3	Heterogeneous nuclear ribonucleoprotein U-like protein 2	HNRNPUL2	5.87247e+07	6.34075e+07	4.26078e+07	5.79898e+07	5.47986e+07	49376980	6.10071e+07	2.5873e+07	9.90733e+06	2.90735e+07	8.40154e+07	30870343	12		25.8075	25.9182	25.3446	25.7893	25.7076	25.5573	25.8625	24.6249	23.2401	24.7932	26.3242	24.8797		3.02913	2.88661	2.14409	2.68935	2.73734	2.42551	3.57923	1.95686	0.909262	2.33983	4.39618	2.43813	2.62763				3.45787	3.34572	2.52734	3.14128
O76021	Ribosomal L1 domain-containing protein 1	RSL1D1	6.86516e+07	8.68196e+07	7.10015e+07	7.85227e+07	5.33366e+07	7.32891e+07	3.87066e+07	6.25818e+07	3.93013e+07	4.00387e+07	4.56405e+07	4.40071e+07	12		26.0328	26.3715	26.0813	26.2266	25.6686	26.1271	25.2061	25.8992	25.2281	25.2549	25.4438	25.3912		3.25446	3.33998	2.88082	3.12666	2.69833	2.99527	2.92283	3.23115	2.89727	2.80152	3.51584	2.94965	3.05115				3.71509	3.87119	3.39575	3.65208
Q9UDY2	Tight junction protein ZO-2	TJP2	2.93822e+07	3.11197e+07	3.468e+07	3.07115e+07	1.3974e+07	2.85522e+07	6.9963e+06	1.32355e+07	3.46405e+07	4.08377e+07	6.41481e+06	3.22246e+07	12		24.8084	24.8913	25.0476	24.8723	23.7362	24.7671	22.7382	23.6579	25.046	25.2834	22.613	24.9417		2.03011	1.85979	1.84708	1.77233	0.765946	1.63528	0.454915	0.989816	2.71515	2.83003	0.685005	2.50007	1.67379				2.31744	2.15558	2.17723	2.07016
Q9NVI7	ATPase family AAA domain-containing protein 3A	ATAD3A	5.01624e+07	7.9413e+07	6.77002e+07	6.82171e+07	7.60832e+07	75477662	1.85391e+07	4.96474e+07	4.75034e+07	4.98775e+07	2.22234e+07	4.06717e+07	12		25.5801	26.2429	26.0127	26.0236	26.1811	26.1695	24.1441	25.5652	25.5015	25.5719	24.4056	25.2775		2.80177	3.21133	2.81213	2.92368	3.21078	3.03773	1.86082	2.89713	3.17072	3.11852	2.47761	2.83594	2.86318				3.19833	3.72209	3.31479	3.415
Q99541	Perilipin-2	PLIN2	2.0755e+07	2.52121e+07	2.9176e+07	3.2359e+07	4.01457e+07	3.33814e+07	7.7019e+06	1.88169e+07	1.16359e+07	1.37388e+07	1.2722e+07	2.40888e+07	12		24.307	24.5876	24.7983	24.9477	25.2587	24.9925	22.8768	24.1655	23.4721	23.7118	23.6008	24.5219		1.52862	1.55607	1.59776	1.84772	2.28845	1.86072	0.593538	1.49744	1.14128	1.25839	1.67285	2.08027	1.57692				1.74498	1.80356	1.88335	2.15822
Q9Y6M1	Insulin-like growth factor 2 mRNA-binding protein 2	IGF2BP2	4.12904e+07	6.01917e+07	6.41791e+07	6.05678e+07	6.79698e+07	9.11004e+07	3.33133e+07	2.39756e+07	1.73827e+07	2.93619e+07	2.16215e+07	3.07681e+07	12		25.2993	25.8431	25.9356	25.852	26.0184	26.441	24.9896	24.5151	24.0512	24.8074	24.366	24.8749		2.52097	2.81152	2.73508	2.7521	3.0481	3.30913	2.70635	1.84697	1.72035	2.35408	2.438	2.43335	2.55633				2.87778	3.25869	3.22396	3.21458
P27816	Microtubule-associated protein 4	MAP4	7.16588e+07	6.96845e+07	7.13221e+07	5.95622e+07	6.33768e+07	5.57884e+07	6.72912e+06	1.45318e+07	8.58926e+06	8708612	2.14586e+06	6.87191e+06	12		26.0946	26.0543	26.0878	25.8279	25.9175	25.7335	22.682	23.7927	23.0341	23.054	21.0331	22.7123		3.31631	3.0228	2.88732	2.72795	2.94716	2.60164	0.398741	1.12462	0.703301	0.600645	-0.894843	0.270694	1.64219				3.78569	3.50356	3.40342	3.18637
O60664	Perilipin-3	PLIN3	5.04945e+07	6.24882e+07	8.43704e+07	6.32181e+07	4.52571e+07	59554595	4.98005e+07	5.76135e+07	33729882	2.80981e+07	1.84349e+07	23408973	12		25.5896	25.8971	26.3302	25.9138	25.4316	25.8277	25.5697	25.7799	25.0075	24.744	24.1359	24.4806		2.81129	2.86554	3.12971	2.81389	2.46135	2.69589	3.28641	3.11181	2.67672	2.29061	2.20797	2.03897	2.69918				3.20919	3.3213	3.68913	3.28675
P54577	Tyrosine--tRNA ligase, cytoplasmic	YARS	2.99092e+07	4.33709e+07	4.13812e+07	4.888e+07	47340045	3.70344e+07	1.53218e+07	1.03783e+07	2.05825e+07	1.43508e+07	1.15081e+07	1.89378e+07	12		24.8341	25.3702	25.3025	25.5427	25.4966	25.1424	23.8691	23.3071	24.2949	23.7746	23.4561	24.1748		2.05575	2.33868	2.10195	2.44279	2.52626	2.01054	1.58583	0.638974	1.96411	1.32126	1.52817	1.73318	1.85396				2.34672	2.71065	2.47766	2.85329
O00232	26S proteasome non-ATPase regulatory subunit 12	PSMD12	5.07608e+07	4.70412e+07	5.99377e+07	4.9756e+07	6.53069e+07	5.27878e+07	2.705e+07	3.9261e+07	2.91698e+07	3.34351e+07	1.47283e+07	2.78249e+07	12		25.5972	25.4874	25.837	25.5684	25.9607	25.6537	24.6891	25.2266	24.798	24.9949	23.8121	24.7299		2.81888	2.45588	2.63644	2.46842	2.99044	2.52188	2.40588	2.5585	2.46717	2.5415	1.88411	2.28829	2.50312				3.21785	2.84648	3.10769	2.88323
Q14789	Golgin subfamily B member 1	GOLGB1	2.06187e+07	1.26935e+07	2.73749e+07	1.58834e+07	5.73658e+06	1.86115e+07	1.23001e+07	1.57376e+07	1.76951e+07	1.76951e+07	1.42398e+07	1.28279e+07	12		24.2975	23.5976	24.7063	23.921	22.4518	24.1497	23.5522	23.9077	24.0769	24.0768	23.7634	23.6128		1.51912	0.566044	1.50583	0.821066	-0.518535	1.01787	1.26892	1.23963	1.74605	1.62348	1.83545	1.1712	1.14968				1.73413	0.656072	1.77498	0.959043
O43175	D-3-phosphoglycerate dehydrogenase	PHGDH	8.13155e+07	1.47377e+08	141611264	1.57078e+08	1.00904e+08	1.52501e+08	3.90984e+07	87147197	6.7836e+07	8.22027e+07	5.00868e+07	8.39953e+07	12		26.277	27.1349	27.0774	27.2269	26.5884	27.1842	25.2206	26.377	26.0155	26.2927	25.5779	26.3238		3.4987	4.1034	3.87684	4.12696	3.61811	4.05242	2.93736	3.70886	3.68475	3.83932	3.64996	3.88222	3.74824				3.99389	4.75603	4.5698	4.82048
Q02252	Methylmalonate-semialdehyde dehydrogenase [acylating], mitochondrial	ALDH6A1	4.19075e+07	6.70173e+07	7.8008e+07	7.54024e+07	7.76751e+07	7.93979e+07	3.32968e+07	4.93041e+07	6.37623e+07	7.02728e+07	33503661	48485605	12		25.3207	25.998	26.2171	26.1681	26.2109	26.2426	24.9889	25.5552	25.9262	26.0665	24.9978	25.5311		2.54237	2.96649	3.0166	3.06816	3.24065	3.11078	2.70563	2.88711	3.5954	3.6131	3.06985	3.08947	3.07547				2.90221	3.4383	3.5558	3.58375
P05556	Integrin beta-1	ITGB1	6.03219e+07	89204021	9.63354e+07	8.74453e+07	6.21909e+07	8.80633e+07	4.5107e+07	4.11442e+07	4.98692e+07	5.6718e+07	5.31014e+07	6.1797e+07	12		25.8462	26.4106	26.5216	26.3819	25.8902	26.392	25.4268	25.2942	25.5716	25.7573	25.6622	25.881		3.06785	3.37907	3.32104	3.28193	2.91991	3.26022	3.1436	2.6261	3.24084	3.30394	3.73428	3.43945	3.22652				3.50206	3.9165	3.91466	3.83345
P55265	Double-stranded RNA-specific adenosine deaminase	ADAR	1.27144e+07	1.40699e+07	7.09863e+06	2.01621e+07	1.06164e+06	2.53381e+07	7.69937e+06	5.96383e+07	4.90287e+07	5.35754e+07	7.63218e+06	1.44028e+07	12		23.6	23.7461	22.7591	24.2651	20.0179	24.5948	22.8763	25.8297	25.5471	25.6751	22.8637	23.7798		0.821627	0.714573	-0.441415	1.16519	-2.95244	1.46298	0.593064	3.16165	3.21632	3.2217	0.935695	1.33826	1.1031				0.937918	0.828224	-0.520316	1.361
Q13310	Polyadenylate-binding protein 4	PABPC4	1.31393e+08	1.85599e+08	2.10046e+08	1.76322e+08	1.99589e+08	1.90497e+08	7.64275e+07	1.11507e+08	7.61552e+07	9.40826e+07	7.94563e+07	1.05407e+08	12		26.9693	27.4676	27.6461	27.3936	27.5725	27.5052	26.1876	26.7326	26.1824	26.4874	26.2437	26.6514		4.19098	4.43608	4.44561	4.29369	4.60216	4.37337	3.90434	4.06448	3.85164	4.03406	4.31569	4.20981	4.22683				4.78416	5.14162	5.24024	5.01523
O76094	Signal recognition particle subunit SRP72	SRP72	1.06963e+08	1.23479e+08	1.61351e+08	1.28804e+08	1.43759e+08	121091046	1.30399e+07	7.93717e+07	5.53995e+06	6.15133e+06	1.3669e+07	3.63433e+07	12		26.6725	26.8797	27.2656	26.9406	27.0991	26.8515	23.6364	26.2421	22.4014	22.5525	23.7044	25.1152		3.8942	3.84815	4.06511	3.84065	4.12878	3.7197	1.35319	3.57403	0.0706382	0.0991008	1.77644	2.6736	2.75363				4.44537	4.46018	4.79172	4.48606
Q9NU22	Midasin	MDN1	1.71458e+07	5.40328e+06	7.14144e+06	5.52577e+06	4.37526e+06	4.62559e+06	2.18059e+06	1.07389e+07	7.62301e+06	8.16595e+06	2.60811e+06	7.32776e+06	12		24.0314	22.3654	22.7678	22.3977	22.0609	22.1412	21.0563	23.3563	22.8619	22.9612	21.3146	22.8049		1.25302	-0.666137	-0.432739	-0.702204	-0.909358	-0.990615	-1.22696	0.688249	0.531127	0.507823	-0.613394	0.363356	-0.183152				1.43037	-0.772084	-0.510089	-0.820207
O95831	Apoptosis-inducing factor 1, mitochondrial	AIFM1	43439165	6.08897e+07	4.93857e+07	4.87795e+07	8.54968e+07	4.48982e+07	1.9788e+07	3.70207e+07	3.65908e+07	4.16534e+07	1.62144e+07	5.32245e+07	12		25.3725	25.8597	25.5576	25.5398	26.3494	25.4202	24.2381	25.1418	25.125	25.3119	23.9508	25.6656		2.59416	2.82815	2.35707	2.43982	3.37907	2.28833	1.95488	2.47374	2.79417	2.85856	2.0228	3.224	2.60123				2.96133	3.27796	2.77838	2.84983
P15311	Ezrin	EZR	3.29066e+07	4.68821e+07	5.44444e+07	4.76135e+07	6.12939e+07	4.94511e+07	2.84486e+07	3.49089e+07	2.23742e+07	2.42547e+07	8.44065e+06	1.92567e+07	12		24.9719	25.4825	25.6983	25.5049	25.8692	25.5595	24.7619	25.0571	24.4153	24.5318	23.0089	24.1989		2.19354	2.45099	2.49776	2.40492	2.89895	2.42768	2.47861	2.389	2.08453	2.07839	1.08095	1.75727	2.22855				2.50401	2.84082	2.94422	2.80906
P27487	Dipeptidyl peptidase 4	DPP4	1.63174e+07	1.76602e+07	3.35615e+07	4.00866e+07	2.73604e+07	4.71719e+07	6.51029e+07	1.76451e+07	2.7056e+07	3.16458e+07	7.10437e+07	2.44032e+07	12		23.9599	24.074	25.0003	25.2566	24.7056	25.4914	25.9562	24.0728	24.6894	24.9155	26.0822	24.5406		1.18158	1.04246	1.79978	2.15667	1.73529	2.3596	3.67297	1.40468	2.35864	2.46214	4.15423	2.09898	2.20225				1.34882	1.20826	2.12148	2.51909
Q9UJZ1	Stomatin-like protein 2, mitochondrial	STOML2	2.35501e+07	3.86553e+07	3.10854e+07	3.09677e+07	4.60437e+07	4.32862e+07	2.55934e+07	2.0121e+07	8.32767e+07	7.3768e+07	2.20637e+07	26174371	12		24.4892	25.2042	24.8897	24.8843	25.4565	25.3674	24.6093	24.2622	26.3114	26.1365	24.3952	24.6417		1.7109	2.17262	1.68921	1.78431	2.48621	2.23558	2.32603	1.59411	3.98061	3.68313	2.4672	2.20007	2.36083				1.95305	2.51817	1.99115	2.08416
Q9H4M9	EH domain-containing protein 1	EHD1	1.15184e+07	1.44667e+07	1.75548e+07	2.5194e+07	2.39108e+07	45650728	1.57438e+07	1.32354e+07	1.19983e+07	13954960	8.05433e+06	1.16344e+07	12		23.4574	23.7862	24.0654	24.5866	24.5112	25.4441	23.9083	23.6579	23.5163	23.7343	22.9413	23.4719		0.679099	0.754694	0.864841	1.48663	1.54087	2.31231	1.62503	0.989811	1.18553	1.28091	1.01336	1.03031	1.23028				0.775216	0.874726	1.01943	1.73645
O15067	Phosphoribosylformylglycinamidine synthase	PFAS	3.96983e+07	4.71806e+07	5.14293e+07	4.74652e+07	40660390	4.64801e+07	5.30259e+06	1.16965e+07	2.36909e+06	2.88563e+06	2.64682e+06	5.94206e+06	12		25.2426	25.4917	25.6161	25.5004	25.2771	25.4701	22.3383	23.4796	21.1759	21.4605	21.3358	22.5025		2.46424	2.46015	2.41556	2.40042	2.30683	2.33829	0.0550205	0.811481	-1.1549	-0.99291	-0.592141	0.0609477	1.04775				2.81303	2.85143	2.84733	2.8038
O14745	Na(+)/H(+) exchange regulatory cofactor NHE-RF1	SLC9A3R1	3.89774e+07	5.67593e+07	5.54388e+07	5.12099e+07	42149554	49303429	5.17438e+07	4.66001e+07	1.70756e+07	2.11638e+07	8.13441e+06	1.05969e+07	12		25.2161	25.7584	25.7244	25.6099	25.329	25.5552	25.6249	25.4738	24.0254	24.3351	22.9556	23.3371		2.4378	2.72681	2.52387	2.50997	2.35872	2.42336	3.34164	2.80574	1.69463	1.88173	1.02764	0.895556	2.21896				2.78284	3.16051	2.975	2.93176
P08758	Annexin A5	ANXA5	1.99552e+08	2.6781e+08	3.05222e+08	3.07082e+08	360736475	3.38435e+08	1.45867e+08	1.57896e+08	1.53467e+08	1.6104e+08	1.77266e+08	1.93084e+08	12		27.5722	27.9966	28.1853	28.194	28.4264	28.3343	27.1201	27.2344	27.1934	27.2628	27.4013	27.5247		4.79386	4.96509	4.98476	5.0941	5.45608	5.20248	4.83683	4.56631	4.86255	4.80947	5.47337	5.08307	5.01066				5.47237	5.75478	5.87576	5.95014
A6NHR9	Structural maintenance of chromosomes flexible hinge domain-containing protein 1	SMCHD1	4.53107e+06	9.42913e+06	1.70698e+07	3.36734e+06	5.75363e+06	3.38004e+06	2.97506e+06	4.32359e+06	4.3486e+06	3.71445e+06	3.23739e+06	4.21781e+06	12		22.1114	23.1687	24.0249	21.6832	22.456	21.6886	21.5045	22.0438	22.0521	21.8247	21.6264	22.0081		-0.666911	0.137154	0.824419	-1.41677	-0.514254	-1.44321	-0.77876	-0.624292	-0.278684	-0.628648	-0.301569	-0.43352	-0.510421				-0.761304	0.158968	0.97178	-1.65485
O75521	Enoyl-CoA delta isomerase 2, mitochondrial	ECI2	4.78291e+07	5.26969e+07	5.44272e+07	4.55896e+07	6.79741e+07	6.10039e+07	3.33495e+07	3.13503e+07	3.63925e+07	4.21115e+07	3.18838e+07	3.8574e+07	12		25.5114	25.6512	25.6978	25.4422	26.0185	25.8624	24.9912	24.902	25.1171	25.3277	24.9263	25.2011		2.73305	2.61968	2.4973	2.34225	3.04819	2.73058	2.70792	2.23388	2.78634	2.87434	2.99835	2.75954	2.69428				3.11988	3.03633	2.94368	2.73586
P80404	4-aminobutyrate aminotransferase, mitochondrial	ABAT	1.30508e+07	1.36119e+07	5.37513e+07	1.83569e+07	2.07824e+07	18644741	1.84035e+07	1.61429e+07	1.34273e+07	1.53469e+07	1.08047e+07	1.02222e+07	12		23.6376	23.6984	25.6798	24.1298	24.3089	24.1523	24.1335	23.9444	23.6787	23.8714	23.3652	23.2852		0.859306	0.666825	2.47927	1.02987	1.33857	1.02044	1.85023	1.27631	1.34786	1.41808	1.43719	0.843621	1.2973				0.98093	0.772882	2.92243	1.20294
P25786	Proteasome subunit alpha type-1	PSMA1	7.82011e+07	8.41025e+07	8.8593e+07	8.07824e+07	1.01481e+08	7.88882e+07	2.12819e+07	6.01215e+07	2.8399e+07	2.66951e+07	6.77675e+06	1.79344e+07	12		26.2207	26.3256	26.4007	26.2675	26.5966	26.2333	24.3431	25.8414	24.7593	24.6701	22.6922	24.0962		3.44235	3.29411	3.20017	3.16759	3.62634	3.10149	2.05988	3.17329	2.42853	2.2167	0.764193	1.65464	2.67744				3.92957	3.81802	3.77218	3.69989
O75153	Clustered mitochondria protein homolog	CLUH	4.72289e+07	6.20405e+07	5.70322e+07	5.82919e+07	6.73457e+07	43368385	848681	4.88767e+07	3.20858e+07	3.10291e+07	800084	4.24475e+07	12		25.4932	25.8867	25.7653	25.7968	26.0051	25.3701	19.6949	25.5426	24.9354	24.8871	19.6098	25.3392		2.71483	2.85517	2.56475	2.69684	3.03479	2.23832	-2.58838	2.87456	2.60463	2.43375	-2.31818	2.89759	1.83406				3.09908	3.30927	3.02319	3.15004
Q5T9A4	ATPase family AAA domain-containing protein 3B	ATAD3B	1.58594e+07	3.08724e+07	3.58154e+07	3.0097e+07	2.69646e+07	27772883	1.72608e+07	2.12482e+07	1.17803e+07	1.99515e+07	1.25087e+07	4.88582e+07	12		23.9188	24.8798	25.0941	24.8431	24.6846	24.7272	24.041	24.3408	23.4899	24.25	23.5764	25.5421		1.1405	1.84827	1.89355	1.74317	1.71427	1.59535	1.75775	1.67275	1.15907	1.79663	1.64846	3.10051	1.75586				1.30193	2.14224	2.23201	2.0361
P48735	Isocitrate dehydrogenase [NADP], mitochondrial	IDH2	4.6611e+07	9.63887e+07	1.06856e+08	1.15458e+08	6.16595e+07	9.72866e+07	3.64229e+07	5.42981e+07	3.95545e+07	4.60562e+07	4.41556e+07	4.55818e+07	12		25.4742	26.5224	26.6711	26.7828	25.8778	26.5357	25.1183	25.6944	25.2373	25.4569	25.3961	25.442		2.69583	3.49082	3.47057	3.68285	2.90753	3.40392	2.8351	3.02631	2.90654	3.00353	3.46812	3.00037	3.15762				3.0774	4.04603	4.09092	4.30173
Q9BSJ8	Extended synaptotagmin-1	ESYT1	4.53301e+07	6.36879e+07	6.54371e+07	65491483	5.45955e+07	6.313e+07	1.54831e+07	4.06454e+07	1.96992e+07	2.0454e+07	1.51312e+07	1.92952e+07	12		25.434	25.9245	25.9636	25.9648	25.7023	25.9118	23.8842	25.2766	24.2316	24.2859	23.851	24.2017		2.65563	2.89298	2.76308	2.86486	2.73199	2.78	1.60094	2.6085	1.90083	1.83251	1.92305	1.76015	2.35954				3.0315	3.3531	3.25697	3.34628
O00159	Unconventional myosin-Ic	MYO1C	5.4987e+07	3.92894e+07	3.80316e+07	3.65351e+07	3.65125e+07	55421203	3.22395e+07	5.84938e+07	5.2374e+07	5.65537e+07	3.59317e+07	4.78155e+07	12		25.7126	25.2276	25.1807	25.1228	25.1219	25.7239	24.9423	25.8018	25.6423	25.7531	25.0988	25.511		2.93426	2.1961	1.98017	2.02283	2.15159	2.59211	2.65908	3.13369	3.31154	3.29975	3.17078	3.06939	2.71011				3.34956	2.54538	2.33412	2.36276
P22695	Cytochrome b-c1 complex subunit 2, mitochondrial	UQCRC2	7.6565e+07	1.16638e+08	1.25564e+08	1.4551e+08	1.28703e+08	9.46152e+07	5.73366e+07	7.03587e+07	6.20201e+07	6.60749e+07	6.83579e+07	7.90343e+07	12		26.1902	26.7975	26.9038	27.1165	26.9395	26.4956	25.773	26.0682	25.8862	25.9776	26.0266	26.236		3.41185	3.76592	3.70332	4.01659	3.96917	3.36375	3.48971	3.40014	3.55543	3.52423	4.09864	3.79439	3.67443				3.89475	4.36488	4.36527	4.69156
P32754	4-hydroxyphenylpyruvate dioxygenase	HPD	3.17838e+07	1.90015e+08	4.67529e+07	2.61883e+07	8.53337e+07	1.98684e+07	15550367	2.33407e+07	7.29927e+06	1.09499e+07	4.04977e+06	5.74428e+06	12		24.9218	27.5015	25.4786	24.6424	26.3466	24.244	23.8904	24.4763	22.7993	23.3844	21.9494	22.4537		2.14346	4.47	2.27803	1.54247	3.37632	1.11215	1.6072	1.80825	0.468519	0.931042	0.0214374	0.0121097	1.64758				2.44684	5.18094	2.68522	1.80168
P09525	Annexin A4	ANXA4	9.10727e+07	1.36782e+08	1.85105e+08	1.55269e+08	1.84593e+08	1.86722e+08	6.34024e+07	8.99331e+07	8.11848e+07	9.35321e+07	8.99724e+07	7.5635e+07	12		26.4405	27.0273	27.4638	27.2102	27.4598	27.4763	25.918	26.4223	26.2747	26.479	26.423	26.1726		3.66218	3.99576	4.26324	4.11024	4.48948	4.3445	3.63479	3.75426	3.9439	4.02559	4.49501	3.73097	4.03749				4.18052	4.63128	5.02527	4.80095
Q9H0A0	RNA cytidine acetyltransferase	NAT10	2.93741e+07	2.82158e+07	3.20426e+07	3.28202e+07	2.97361e+07	2.51483e+07	1.36555e+07	19410179	1.68889e+07	1.78956e+07	16005710	1.86097e+07	12		24.808	24.75	24.9335	24.9681	24.8257	24.584	23.703	24.2103	24.0096	24.0931	23.9321	24.1495		2.02971	1.71846	1.73296	1.86813	1.85542	1.45214	1.41973	1.54222	1.67877	1.63973	2.00411	1.70796	1.72078				2.31699	1.99177	2.04272	2.18206
P23528	Cofilin-1	CFL1	1.48685e+08	1.33348e+08	1.71512e+08	1.18993e+08	1.99767e+08	2.0114e+08	1.26077e+08	1.27467e+08	6.76968e+07	6.16622e+07	4.11649e+07	4.46294e+07	12		27.1477	26.9906	27.3537	26.8263	27.5737	27.5836	26.9097	26.9255	26.0126	25.8779	25.2949	25.4115		4.36935	3.95908	4.15321	3.72636	4.60345	4.45181	4.62648	4.25746	3.68178	3.42452	3.36694	2.96991	3.96586				4.98777	4.58876	4.89558	4.35255
Q9UBT2	SUMO-activating enzyme subunit 2	UBA2	4.61746e+07	2.77497e+07	2.78039e+07	2.65873e+07	3.37863e+07	2.93772e+07	2.80161e+07	3.69561e+07	3.03768e+07	3.33705e+07	2.25259e+07	3.80343e+07	12		25.4606	24.726	24.7288	24.6642	25.0099	24.8082	24.7398	25.1393	24.8565	24.9921	24.4251	25.1808		2.68226	1.69443	1.52826	1.56429	2.03964	1.67637	2.45651	2.47122	2.52566	2.5387	2.49711	2.73921	2.20114				3.0619	1.96392	1.80143	1.82716
Q9Y6D5	Brefeldin A-inhibited guanine nucleotide-exchange protein 2	ARFGEF2	2.1951e+07	2.22157e+07	1.96622e+06	1.7253e+07	2.82004e+07	1.71943e+07	2.02507e+06	2.26799e+07	3.55989e+07	2.82957e+07	1.31799e+06	2.3176e+07	12		24.3878	24.4051	20.907	24.0403	24.7492	24.0354	20.9495	24.4349	25.0853	24.7541	20.3299	24.4661		1.60945	1.37353	-2.29353	0.940399	1.77892	0.903608	-1.33371	1.76682	2.75453	2.30071	-1.59806	2.02455	0.852268				1.83725	1.59199	-2.70349	1.09843
O43242	26S proteasome non-ATPase regulatory subunit 3	PSMD3	119189915	8.27957e+07	8.00756e+07	6.8846e+07	1.18658e+08	1.10445e+08	3.82284e+07	9.88752e+07	8.18677e+07	8.05837e+07	3.36261e+07	6.6804e+07	12		26.8287	26.3031	26.2549	26.0369	26.8222	26.7188	25.1881	26.5591	26.2868	26.264	25.0031	25.9934		4.05035	3.27151	3.05434	2.93692	3.85194	3.58693	2.9049	3.89102	3.95599	3.81062	3.07511	3.55185	3.49512				4.62363	3.79184	3.60028	3.43046
Q5VYK3	Proteasome adapter and scaffold protein ECM29	ECPAS	1.33701e+07	1.02964e+07	7.33087e+06	2.41801e+07	1.32937e+07	18081012	900817	1.03212e+07	8.51143e+06	1.02153e+07	1.02647e+06	1.29962e+07	12		23.6725	23.2956	22.8056	24.5273	23.6642	24.108	19.7809	23.2991	23.021	23.2842	19.9693	23.6316		0.894175	0.264091	-0.394971	1.42737	0.693947	0.976151	-2.50237	0.631018	0.690167	0.83086	-1.95871	1.19001	0.228478				1.02073	0.306094	-0.46557	1.66723
Q08J23	tRNA (cytosine(34)-C(5))-methyltransferase	NSUN2	1.20777e+07	2.27278e+07	2.98108e+07	2.54436e+07	1.29451e+07	2.99438e+07	2.25511e+07	2.84496e+07	2.04111e+07	2.77927e+07	1.82369e+07	1.07626e+07	12		23.5258	24.438	24.8293	24.6008	23.6259	24.8358	24.4267	24.7619	24.2829	24.7282	24.1204	23.3595		0.747508	1.40642	1.62881	1.50085	0.655604	1.70393	2.14345	2.09382	1.95205	2.27483	2.19239	0.917935	1.60147				0.853309	1.6301	1.91995	1.75307
Q96AE4	Far upstream element-binding protein 1	FUBP1	53707230	4.74567e+07	6.18223e+07	78327196	50243566	67344323	1.06216e+07	39042782	1.59892e+07	1.66632e+07	14562991	14491466	12		25.6786	25.5001	25.8816	26.223	25.5824	26.0051	23.3405	25.2186	23.9306	23.9902	23.7958	23.7887		2.90028	2.46857	2.6811	3.12306	2.61214	2.87323	1.05726	2.55046	1.59979	1.53679	1.86783	1.34712	2.21814				3.31078	2.86119	3.16033	3.64788
Q14554	Protein disulfide-isomerase A5	PDIA5	1.92014e+07	2.7621e+07	4.75311e+07	4.10443e+07	2.473e+07	4.43744e+07	8.88428e+06	2.16672e+07	1.51863e+07	2.07112e+07	9.44421e+06	2.5438e+07	12		24.1947	24.7193	25.5024	25.2907	24.5598	25.4032	23.0828	24.369	23.8563	24.3039	23.171	24.6005		1.41638	1.68772	2.30185	2.19073	1.58946	2.2714	0.799579	1.70092	1.52547	1.85054	1.24303	2.1589	1.728				1.61685	1.95615	2.71329	2.55887
O00469	Procollagen-lysine,2-oxoglutarate 5-dioxygenase 2	PLOD2	3.96289e+07	4.66592e+07	6.24213e+07	3.94557e+07	5.1826e+07	5.47924e+07	4.27318e+08	3.19984e+08	3.44899e+08	3.62289e+08	2.41733e+08	275753330	12		25.2401	25.4757	25.8955	25.2337	25.6272	25.7075	28.6707	28.2534	28.3616	28.4326	27.8488	28.0388		2.46172	2.44412	2.69501	2.13378	2.65688	2.57565	6.38749	5.58534	6.0308	5.9792	5.92087	5.59722	4.20567				2.81014	2.83285	3.17673	2.49236
Q9UHB9	Signal recognition particle subunit SRP68	SRP68	1.62094e+07	1.67735e+07	1.87629e+07	1.67398e+07	2.14275e+07	2.4145e+07	2.58549e+06	3.84636e+06	2.10352e+06	1.64343e+06	2.2488e+06	9.89397e+06	12		23.9503	23.9997	24.1614	23.9968	24.353	24.5252	21.302	21.8751	21.0044	20.6483	21.1007	23.2381		1.17199	0.96814	0.960856	0.896828	1.38266	1.3934	-0.981241	-0.793029	-1.32643	-1.80509	-0.827244	0.796534	0.153116				1.33788	1.12212	1.1326	1.04754
Q92621	Nuclear pore complex protein Nup205	NUP205	6.07429e+07	1.72807e+07	1.03008e+07	1.34973e+07	1.33841e+07	1.8518e+07	4.50176e+06	4.14223e+07	2.12498e+07	2.67855e+07	5.18211e+06	2.54541e+07	12		25.8562	24.0427	23.2963	23.6862	23.674	24.1424	22.1021	25.3039	24.3409	24.6749	22.3051	24.6014		3.07788	1.01112	0.0957343	0.586215	0.703722	1.01061	-0.181188	2.63582	2.01014	2.22158	0.37714	2.15981	1.30905				3.51351	1.17193	0.112846	0.684726
Q01518	Adenylyl cyclase-associated protein 1	CAP1	3.22413e+07	5.61043e+07	4.62984e+07	53325621	3.64735e+07	4.62342e+07	2.17903e+07	3.89239e+07	2.56538e+07	2.91356e+07	9.35452e+06	22929827	12		24.9424	25.7416	25.4645	25.6683	25.1203	25.4625	24.3772	25.2142	24.6127	24.7963	23.1572	24.4507		2.16408	2.71007	2.26394	2.56838	2.15005	2.33064	2.09394	2.54606	2.28187	2.34291	1.22926	2.00914	2.22419				2.47037	3.1411	2.6686	2.99998
P35241	Radixin	RDX	5532168	8.58e+06	1.98486e+07	1.37855e+07	7.14387e+06	8.62304e+06	9.86605e+06	6.96337e+06	5.93094e+06	3.32355e+07	5.49491e+06	5.52591e+06	12		22.3994	23.0325	24.2425	23.7167	22.7683	23.0398	23.234	22.7314	22.4998	24.9862	22.3897	22.3978		-0.378919	0.00100692	1.04201	0.616704	-0.202019	-0.0920562	0.950797	0.0632652	0.169027	2.53286	0.461695	-0.0438043	0.426714				-0.43255	0.00116707	1.22826	0.720339
Q15155	Nodal modulator 1	NOMO1	4.36123e+06	2.98391e+06	4.47397e+06	3.83104e+06	3.87987e+06	2.58077e+06	1.8379e+06	4094423	2.34623e+06	3.40062e+06	2.88502e+06	2927562	12		22.0563	21.5088	22.0931	21.8693	21.8876	21.2994	20.8096	21.9652	21.1619	21.6974	21.4602	21.4813		-0.722029	-1.52277	-1.1074	-1.23064	-1.08272	-1.83245	-1.47362	-0.70286	-1.16889	-0.755998	-0.467818	-0.960316	-1.08563				-0.824223	-1.76496	-1.30534	-1.43745
P21964	Catechol O-methyltransferase	COMT	3.4915e+07	5.6879e+07	6.40229e+07	5.38857e+07	1.76335e+06	6.77587e+07	3.10913e+07	3.96904e+07	2.81563e+07	3.34065e+07	2.5319e+07	3.61326e+07	12		25.0573	25.7614	25.9321	25.6834	20.7499	26.0139	24.89	25.2423	24.747	24.9936	24.5937	25.1068		2.27901	2.72985	2.73156	2.58345	-2.22041	2.88208	2.60676	2.5742	2.41615	2.54026	2.66575	2.66521	2.20449				2.60158	3.16403	3.21981	3.01759
A0AVT1	Ubiquitin-like modifier-activating enzyme 6	UBA6	1.69813e+07	5.1129e+07	7.22897e+07	6.68739e+07	2.97935e+07	6.40732e+07	1.64433e+07	2.01243e+07	1.62375e+07	18591319	1.3335e+07	2.09986e+07	12		24.0174	25.6076	26.1073	25.9949	24.8285	25.9332	23.971	24.2624	23.9528	24.1481	23.6687	24.3238		1.23911	2.5761	2.90676	2.89499	1.8582	2.8014	1.68775	1.59435	1.62202	1.69476	1.74075	1.8822	2.04153				1.41449	2.98582	3.42633	3.38149
Q8N163	Cell cycle and apoptosis regulator protein 2	CCAR2	4.43916e+07	2.68052e+07	5.36048e+07	2.48292e+07	4.81588e+07	5.47135e+07	1.42554e+07	3.86983e+07	2.89171e+07	3.09444e+07	9.95672e+06	8.7509e+06	12		25.4038	24.676	25.6759	24.5655	25.5213	25.7054	23.765	25.2058	24.7854	24.8832	23.2472	23.061		2.62545	1.64447	2.47533	1.46559	2.551	2.57357	1.48176	2.53768	2.45462	2.42981	1.31927	0.619416	2.01483				2.99705	1.90602	2.91779	1.71187
Q7KZ85	Transcription elongation factor SPT6	SUPT6H	6.93349e+06	9.20422e+06	2.67939e+07	3.12216e+07	1.33689e+07	1.3157e+07	2.89046e+06	6.90522e+06	2.16529e+06	3.02746e+06	1.87821e+06	6.07084e+06	12		22.7252	23.1339	24.6754	24.896	23.6724	23.6493	21.4629	22.7193	21.0461	21.5297	20.8409	22.5335		-0.0531823	0.102325	1.47488	1.79609	0.702081	0.517503	-0.820378	0.0511674	-1.28467	-0.923691	-1.08704	0.0918804	0.0472464				-0.0607096	0.1186	1.7385	2.09792
P09960	Leukotriene A-4 hydrolase	LTA4H	3.5804e+07	1.0071e+08	5.83299e+07	9.41515e+07	8.93041e+07	8.78311e+07	2.45889e+08	4.26637e+07	1.83228e+07	5.10763e+07	3.25332e+08	1.37363e+07	12		25.0936	26.5856	25.7977	26.4885	26.4122	26.3882	27.8734	25.3465	24.1271	25.6062	28.2773	23.7115		2.31529	3.55409	2.59721	3.38853	3.44193	3.25641	5.59019	2.67842	1.79634	3.15278	6.34937	1.26991	3.28254				2.64298	4.11936	3.06145	3.95796
Q5JTH9	RRP12-like protein	RRP12	3.77831e+07	1.49533e+07	3.9455e+07	1.8879e+07	1.88344e+07	7.44963e+07	1.13348e+07	3.36311e+07	2.6646e+07	2.77488e+07	9.56969e+06	3.06111e+07	12		25.1712	23.834	25.2337	24.1703	24.1669	26.1507	23.4343	25.0033	24.6674	24.7259	23.19	24.8675		2.39291	0.802423	2.03318	1.07033	1.19657	3.01884	1.15102	2.3352	2.33661	2.27256	1.26207	2.42597	1.85814				2.73159	0.930046	2.3966	1.2502
O00151	PDZ and LIM domain protein 1	PDLIM1	5.71861e+07	8.65792e+07	8.82787e+07	9.76535e+07	8.31298e+07	7.4045e+07	2.70767e+07	3.57795e+07	2.02852e+07	2.06547e+07	1.02953e+07	16746638	12		25.7692	26.3675	26.3956	26.5412	26.3089	26.1419	24.6905	25.0926	24.2739	24.3	23.2955	23.9974		2.99083	3.33598	3.19504	3.44122	3.33857	3.01008	2.4073	2.42454	1.94312	1.8466	1.36751	1.55578	2.57138				3.41414	3.86655	3.76614	4.01951
P23284	Peptidyl-prolyl cis-trans isomerase B	PPIB	2.40703e+08	3.15025e+08	4.37571e+08	3.33373e+08	3.50606e+08	3.47563e+08	2.03352e+08	1.88607e+08	1.80892e+08	2.16918e+08	1.33544e+08	1.10721e+08	12		27.8427	28.2309	28.7049	28.3126	28.3853	28.3727	27.5994	27.4908	27.4306	27.6926	26.9927	26.7223		5.06435	5.19935	5.50442	5.21261	5.41498	5.24088	5.31616	4.82272	5.09975	5.23921	5.06478	4.28076	5.12166				5.78114	6.02629	6.48831	6.08857
A5YKK6	CCR4-NOT transcription complex subunit 1	CNOT1	2.54393e+07	2.93052e+06	3.53933e+07	2.72829e+06	3.39927e+07	6.76845e+06	2.33713e+06	1.46515e+07	7.82121e+06	6.61638e+06	2.49178e+06	6.45819e+06	12		24.6006	21.4827	25.077	21.3796	25.0187	22.6904	21.1563	23.8045	22.899	22.6576	21.2487	22.6227		1.82222	-1.54882	1.87645	-1.72038	2.04843	-0.441426	-1.12694	1.13646	0.568157	0.204244	-0.679223	0.181115	0.193357				2.08013	-1.79515	2.21186	-2.00948
Q14247	Src substrate cortactin	CTTN	1.20607e+08	9.99942e+07	1.0407e+08	1.06266e+08	9.55817e+07	8.08968e+07	8.21123e+07	1.06365e+08	8.16698e+07	8.46908e+07	4.55662e+07	5.71687e+07	12		26.8457	26.5753	26.633	26.6631	26.5102	26.2696	26.2911	26.6645	26.2833	26.3357	25.4415	25.7687		4.0674	3.5438	3.43246	3.56316	3.53994	3.13776	4.00785	3.99636	3.9525	3.88234	3.51349	3.32714	3.66368				4.64309	4.10743	4.04599	4.16194
P13804	Electron transfer flavoprotein subunit alpha, mitochondrial	ETFA	1.16297e+08	1.66413e+08	1.9076e+08	1.59248e+08	5.42384e+07	1.52301e+08	9.77978e+07	1.12443e+08	105484088	1.17088e+08	9.11553e+07	8.65803e+07	12		26.7932	27.3102	27.5072	27.2467	25.6928	27.1823	26.5433	26.7446	26.6525	26.803	26.4418	26.3675		4.01491	4.27866	4.30666	4.14675	2.72252	4.05053	4.26005	4.07653	4.32165	4.34965	4.51385	3.92595	4.08064				4.58317	4.95917	5.07646	4.8436
P35613	Basigin	BSG	1.81779e+08	1.95745e+08	2.15389e+08	2.07449e+08	141565491	1.77973e+08	139569674	1.54438e+08	1.30214e+08	1.42287e+08	1.23156e+08	1.76446e+08	12		27.4376	27.5444	27.6824	27.6282	27.0769	27.4071	27.0564	27.2025	26.9563	27.0842	26.8759	27.3946		4.65928	4.51286	4.48185	4.52823	4.1066	4.27526	4.77317	4.53437	4.62551	4.63086	4.94794	4.95306	4.58575				5.31874	5.23062	5.28296	5.28919
Q9UKV3	Apoptotic chromatin condensation inducer in the nucleus	ACIN1	7.8688e+06	2.48647e+07	3.13602e+07	2.49573e+07	1.88557e+07	2.84014e+07	7.74677e+06	9.52585e+06	9.72964e+06	9.51741e+06	1.00453e+07	1.30765e+07	12		22.9077	24.5676	24.9024	24.573	24.1685	24.7595	22.8852	23.1834	23.214	23.1821	23.26	23.6405		0.129379	1.53606	1.70191	1.47301	1.1982	1.62764	0.601918	0.515327	0.883153	0.728771	1.33205	1.19889	1.07719				0.147691	1.78036	2.00611	1.72054
Q8TEQ6	Gem-associated protein 5	GEMIN5	9.11619e+07	8.27212e+07	9.50284e+07	7.18478e+07	1.05636e+08	7.0096e+07	1.55892e+07	1.01018e+08	7.44465e+07	6.97899e+07	1.41899e+07	6.74009e+07	12		26.4419	26.3018	26.5019	26.0984	26.6545	26.0628	23.894	26.59	26.1497	26.0565	23.7584	26.0063		3.6636	3.27021	3.30133	2.99849	3.68424	2.93101	1.6108	3.92195	3.8189	3.60315	1.83039	3.56468	3.18323				4.18213	3.79033	3.89143	3.50238
Q9P258	Protein RCC2	RCC2	39618011	4.55999e+07	4.42958e+07	4.18033e+07	6.06948e+07	4.35235e+07	1.4755e+07	2.5974e+07	2.18834e+07	2.83757e+07	1.49375e+07	3.63719e+07	12		25.2397	25.4425	25.4007	25.3171	25.8551	25.3753	23.8147	24.6306	24.3833	24.7582	23.8324	25.1163		2.46132	2.41099	2.20014	2.21717	2.88477	2.24347	1.53146	1.96248	2.05253	2.30479	1.90447	2.67474	2.23736				2.80969	2.79445	2.59341	2.58975
P09110	3-ketoacyl-CoA thiolase, peroxisomal	ACAA1	4.31205e+07	4.21173e+07	61712985	4.49217e+07	3.31016e+07	5.30059e+07	8.7322e+06	4.58884e+07	2.88087e+07	2.90233e+07	8.46016e+06	3.52323e+07	12		25.3619	25.3279	25.8791	25.4209	24.9804	25.6596	23.0579	25.4516	24.78	24.7907	23.0123	25.0704		2.58354	2.29637	2.67855	2.32096	2.0101	2.52783	0.774669	2.78354	2.4492	2.33734	1.08428	2.62881	2.20627				2.94921	2.6616	3.15732	2.71099
P04844	Dolichyl-diphosphooligosaccharide--protein glycosyltransferase subunit 2	RPN2	1.67316e+08	1.18721e+08	1.33523e+08	9.95484e+07	1.0094e+08	7.62954e+07	7.66579e+07	1.61799e+08	1.34249e+08	1.24574e+08	6.89268e+07	9.47265e+07	12		27.318	26.823	26.9925	26.5689	26.5889	26.1851	26.1919	27.2696	27.0003	26.8924	26.0386	26.4973		4.53967	3.79146	3.79199	3.46895	3.61862	3.05327	3.90869	4.60153	4.66953	4.43906	4.11059	4.05568	4.00409				5.1822	4.39448	4.46979	4.05189
P07148	Fatty acid-binding protein, liver	FABP1	6.55036e+08	7.25418e+08	9.37005e+08	9.04235e+08	7.83685e+08	8.25843e+08	4.50992e+08	5.89584e+08	3.52454e+08	3.24602e+08	1.80671e+08	2.03886e+08	12		29.287	29.4342	29.8035	29.7521	29.5457	29.6213	28.7485	29.1351	28.3929	28.2741	27.4288	27.6032		6.50867	6.4027	6.60296	6.65218	6.5754	6.48947	6.46528	6.46703	6.06206	5.82073	5.50082	5.1616	6.22574				7.42989	7.42103	7.7832	7.77005
P00441	Superoxide dismutase [Cu-Zn]	SOD1	1.34304e+08	1.89545e+08	1.77507e+08	1.54407e+08	2442647	1.63598e+08	1.0006e+08	1.11891e+08	7.43139e+07	51192877	2.3012e+07	4.09916e+07	12		27.0009	27.498	27.4033	27.2022	21.22	27.2856	26.5763	26.7375	26.1471	25.6094	24.4559	25.2888		4.22259	4.46643	4.20278	4.10222	-1.75028	4.15376	4.29304	4.06943	3.81633	3.15607	2.52791	2.84724	3.34229				4.82025	5.1768	4.954	4.79158
O94925	Glutaminase kidney isoform, mitochondrial	GLS	3.69795e+07	4.24251e+07	4.73969e+07	4.23331e+07	3.76086e+07	3.20526e+07	3.45754e+07	4.10662e+07	22914766	2.98765e+07	2.28644e+07	2.42838e+07	12		25.1402	25.3384	25.4983	25.3353	25.1646	24.9339	25.0432	25.2914	24.4498	24.8325	24.4466	24.5335		2.36189	2.30687	2.29777	2.23533	2.19427	1.80212	2.76	2.62336	2.11897	2.37914	2.51863	2.0919	2.30752				2.69619	2.67378	2.70848	2.61097
P08727	Keratin, type I cytoskeletal 19	KRT19	2.67894e+07	3.85175e+07	2.26384e+07	33047652	44560331	3.40059e+07	2.04559e+07	3.30081e+07	2.77509e+07	2.66134e+07	1.67785e+07	2.04549e+07	12		24.6752	25.199	24.4323	24.978	25.4093	25.0193	24.286	24.9763	24.726	24.6657	24.0001	24.2859		1.89683	2.16747	1.23175	1.8781	2.43896	1.88746	2.00277	2.30823	2.39523	2.21228	2.07214	1.84436	2.02796				2.1653	2.5122	1.45192	2.1937
P55884	Eukaryotic translation initiation factor 3 subunit B	EIF3B	6.28509e+07	4.39867e+07	5.21292e+07	4.7173e+07	3.86629e+07	4.50308e+07	2.70278e+07	4.9783e+07	3.28818e+07	3.91027e+07	3.12326e+07	3.67926e+07	12		25.9054	25.3906	25.6356	25.4915	25.2044	25.4244	24.6879	25.5691	24.9708	25.2208	24.8965	25.1329		3.1271	2.35903	2.43507	2.39151	2.23415	2.29259	2.4047	2.90106	2.63998	2.7674	2.96858	2.69133	2.60104				3.5697	2.73422	2.87032	2.7934
Q16881	Thioredoxin reductase 1, cytoplasmic	TXNRD1	4.04851e+07	3.61252e+07	3.58305e+07	44096526	1.75087e+07	3.797e+07	2.02781e+07	2.6108e+07	2.71063e+07	2.47445e+07	1.77201e+07	2.96634e+07	12		25.2709	25.1065	25.0947	25.3942	24.0616	25.1784	24.2734	24.638	24.6921	24.5606	24.0789	24.8222		2.49255	2.07496	1.89416	2.29421	1.09127	2.04654	1.99018	1.9699	2.36132	2.10724	2.15091	2.3806	2.07115				2.84534	2.40498	2.23273	2.67975
P40926	Malate dehydrogenase, mitochondrial	MDH2	1.46008e+08	2.056e+08	2.61317e+08	2.52019e+08	1.97887e+08	2.0821e+08	1.35794e+08	1.73791e+08	8.41674e+07	1.17482e+08	5.32158e+07	5.80708e+07	12		27.1215	27.6153	27.9612	27.909	27.5601	27.6335	27.0168	27.3728	26.3268	26.8079	25.6654	25.7913		4.34314	4.58373	4.7607	4.80901	4.58981	4.50164	4.7336	4.70469	3.99596	4.3545	3.73738	3.34973	4.37199				4.95786	5.31276	5.61166	5.61714
Q96A33	Coiled-coil domain-containing protein 47	CCDC47	3.98778e+07	6.39813e+07	7.28398e+07	7.1214e+07	5.52156e+07	6.51242e+07	2.74733e+07	3.313e+07	3.043e+07	3.32275e+07	3.30232e+07	4.57165e+07	12		25.2491	25.9311	26.1182	26.0857	25.7186	25.9567	24.7115	24.9816	24.859	24.9859	24.977	25.4462		2.47075	2.89961	2.9177	2.98571	2.74828	2.82487	2.42828	2.31354	2.52819	2.53251	3.04901	3.00463	2.72526				2.82045	3.36078	3.43923	3.48745
P18754	Regulator of chromosome condensation	RCC1	31362594	3.80517e+07	4.17686e+07	2.96669e+07	4.70707e+07	4.41334e+07	1.25297e+07	2.41193e+07	2.46318e+07	2.9626e+07	1.49664e+07	2.80746e+07	12		24.9025	25.1815	25.3159	24.8224	25.4883	25.3954	23.5788	24.5237	24.554	24.8204	23.8352	24.7428		2.12421	2.14992	2.11539	1.72241	2.51803	2.26355	1.2956	1.85559	2.22322	2.367	1.90725	2.30118	2.07028				2.42486	2.49186	2.49351	2.01185
Q9BXP5	Serrate RNA effector molecule homolog	SRRT	2.68634e+07	3.40719e+07	2.99859e+07	2.62259e+07	3.55312e+07	2.99077e+07	1.86572e+07	2.1335e+07	21857346	2.33321e+07	8.78795e+06	18459050	12		24.6791	25.0221	24.8378	24.6445	25.0826	24.834	24.1532	24.3467	24.3816	24.4758	23.0671	24.1378		1.9008	1.99054	1.63726	1.54454	2.11229	1.70219	1.86998	1.67863	2.05081	2.02245	1.13913	1.69624	1.77874				2.16984	2.30713	1.92991	1.80409
Q08945	FACT complex subunit SSRP1	SSRP1	2.35813e+07	2.55796e+07	3.62858e+07	3.18851e+07	2.97949e+07	3.2054e+07	9.15607e+06	2.19523e+07	1.4536e+07	1.57438e+07	9.10985e+06	1.7163e+07	12		24.4911	24.6085	25.1129	24.9264	24.8286	24.934	23.1263	24.3879	23.7931	23.9083	23.119	24.0328		1.71281	1.57695	1.91238	1.82643	1.85827	1.80218	0.843052	1.71978	1.46233	1.45491	1.19103	1.59121	1.57928				1.95523	1.82776	2.25421	2.13336
P17174	Aspartate aminotransferase, cytoplasmic	GOT1	1.84941e+08	2.3438e+08	2.68092e+08	2.31096e+08	2.78505e+08	269646795	8.73791e+07	1.58523e+08	7.508e+07	9.43006e+07	2.36817e+07	6.97151e+07	12		27.4625	27.8043	27.9982	27.7839	28.0531	28.0065	26.3808	27.2401	26.1619	26.4908	24.4973	26.055		4.68416	4.77274	4.79763	4.68397	5.08284	4.87467	4.09754	4.57203	3.83112	4.0374	2.5693	3.61338	4.3014				5.34714	5.53183	5.65518	5.47109
Q9HCE1	Helicase MOV-10	MOV10	4.48626e+07	4.32483e+07	4.13017e+07	4.15373e+07	4.13199e+07	4.19188e+07	5.3848e+06	4.00892e+07	1.42726e+07	1.47545e+07	6.96458e+06	2.04809e+07	12		25.419	25.3661	25.2997	25.3079	25.3003	25.3211	22.3605	25.2567	23.7667	23.8146	22.7316	24.2878		2.64068	2.3346	2.09917	2.20796	2.33004	2.18927	0.0772167	2.58862	1.43594	1.36128	0.803636	1.84619	1.82622				3.01443	2.70591	2.47439	2.579
O15355	Protein phosphatase 1G	PPM1G	1.93821e+08	4.37988e+08	3.03849e+08	3.4597e+08	265246614	2.9743e+08	1.30068e+08	2.23198e+08	1.36686e+07	15271570	7.62539e+07	1.27898e+07	12		27.5302	28.7063	28.1788	28.3661	27.9828	28.148	26.9547	27.7337	23.7044	23.8643	26.1843	23.6085		4.75182	5.67478	4.97825	5.26612	5.01247	5.01615	4.67145	5.06566	1.37355	1.41098	4.25634	1.16691	4.05371				5.42438	6.57733	5.86809	6.15107
P20020	Plasma membrane calcium-transporting ATPase 1	ATP2B1	2.54644e+07	2.29015e+07	1.52955e+07	1.15212e+07	2.55763e+07	2.81803e+07	7.37938e+06	2.16187e+07	2.13962e+07	2.27729e+07	5.98709e+06	1.47166e+07	12		24.602	24.4489	23.8666	23.4578	24.6083	24.7482	22.8151	24.3658	24.3508	24.4408	22.5134	23.8109		1.82365	1.4174	0.666083	0.357845	1.63801	1.61636	0.531824	1.69769	2.02005	1.98745	0.585455	1.36936	1.30926				2.08176	1.64283	0.785142	0.41798
P23526	Adenosylhomocysteinase	AHCY	2.08512e+08	2.32872e+08	238076728	2.45495e+08	2.29998e+08	2.0019e+08	1.2503e+08	1.92731e+08	1.02617e+08	1.16614e+08	6.50157e+07	8.74029e+07	12		27.6356	27.795	27.8269	27.8711	27.777	27.5768	26.8977	27.522	26.6127	26.7972	25.9543	26.3812		4.85722	4.76342	4.62633	4.77117	4.80675	4.44497	4.61446	4.85392	4.28189	4.3438	4.02632	3.93959	4.52749				5.5447	5.52103	5.45326	5.57295
O60547	GDP-mannose 4,6 dehydratase	GMDS	6.65481e+07	7.32448e+07	8.82926e+07	6.2478e+07	2.4472e+07	5.49425e+07	4.38474e+07	6.22135e+07	4.87235e+07	4.39431e+07	43587325	5.837e+07	12		25.9879	26.1262	26.3958	25.8968	24.5446	25.7114	25.386	25.8907	25.5381	25.3891	25.3774	25.7987		3.20956	3.09468	3.19527	2.7969	1.57433	2.5796	3.10274	3.22264	3.20731	2.93577	3.44944	3.35714	2.97711				3.66384	3.58688	3.7664	3.2669
Q02809	Procollagen-lysine,2-oxoglutarate 5-dioxygenase 1	PLOD1	2.97935e+07	3.6294e+07	5.19739e+07	2.9515e+07	3.45763e+07	4.50193e+07	2.6976e+07	3.01436e+07	2.04175e+07	2.4332e+07	2.25618e+07	2.66802e+07	12		24.8285	25.1132	25.6313	24.8149	25.0433	25.424	24.6852	24.8453	24.2833	24.5363	24.4274	24.6693		2.05016	2.08169	2.43076	1.715	2.07298	2.29222	2.40193	2.17726	1.9525	2.08298	2.49941	2.22768	2.16538				2.34033	2.41277	2.86525	2.0032
P30876	DNA-directed RNA polymerase II subunit RPB2	POLR2B	8.83433e+06	6.71559e+07	4.99128e+07	3.05e+07	1862246	3.1583e+07	2.08183e+07	7.03256e+06	2.64892e+06	1.86654e+06	9.62042e+06	2.04976e+06	12		23.0747	26.001	25.5729	24.8623	20.8286	24.9126	24.3114	22.7456	21.337	20.8319	23.1977	20.967		0.296356	2.96947	2.37238	1.76236	-2.14168	1.78082	2.02811	0.0775294	-0.993827	-1.62143	1.2697	-1.47456	0.527102				0.338302	3.44176	2.79643	2.05851
Q8N766	ER membrane protein complex subunit 1	EMC1	3.0261e+07	6.65333e+07	3.94565e+07	28029650	3.68518e+07	6.41659e+06	8.72146e+07	2.8265e+07	3.03941e+07	3.26113e+07	6.44792e+07	4.04643e+07	12		24.851	25.9876	25.2338	24.7405	25.1352	22.6134	26.3781	24.7525	24.8573	24.9589	25.9423	25.2701		2.07262	2.95603	2.03324	1.6405	2.16494	-0.518445	4.09482	2.08442	2.52649	2.5055	4.01436	2.82856	2.36692				2.36598	3.42618	2.39667	1.91618
P00387	NADH-cytochrome b5 reductase 3	CYB5R3	1.70109e+08	1.73161e+08	2.41537e+08	2.24055e+08	2.42796e+08	1.95402e+08	1.31499e+08	1.2565e+08	1.20226e+08	1.54821e+08	9.01062e+07	1.55435e+08	12		27.3419	27.3675	27.8477	27.7393	27.8552	27.5419	26.9705	26.9048	26.8412	27.206	26.4251	27.2117		4.56355	4.336	4.64714	4.63933	4.88488	4.41005	4.68723	4.23675	4.51038	4.75266	4.49715	4.77015	4.57794				5.20946	5.02563	5.4778	5.41895
P50570	Dynamin-2	DNM2	2.48141e+07	2.61851e+07	7.53949e+07	2.60271e+07	1.44705e+07	1.51179e+07	2.11733e+07	3.6646e+07	3.74869e+07	4.12771e+07	1.57498e+07	2.26296e+07	12		24.5647	24.6422	26.168	24.6335	23.7866	23.8498	24.3357	25.1272	25.1599	25.2988	23.9088	24.4317		1.78632	1.6107	2.96744	1.53356	0.81632	0.71793	2.0525	2.45906	2.82908	2.84547	1.98086	1.99013	1.96578				2.03916	1.86688	3.49786	1.79127
P07339	Cathepsin D	CTSD	9.3543e+07	9.51526e+07	1.29019e+08	1.07048e+08	7.51343e+07	9.87142e+07	6.57924e+07	7.70349e+07	4.55999e+07	5.27817e+07	2.77034e+07	3.44638e+07	12		26.4791	26.5037	26.943	26.6737	26.163	26.5568	25.9714	26.199	25.4425	25.6535	24.7236	25.0386		3.70079	3.4722	3.74248	3.57374	3.19267	3.42493	3.68817	3.53092	3.11173	3.20017	2.79559	2.59699	3.33587				4.22459	4.02444	4.41143	4.17429
Q8NBS9	Thioredoxin domain-containing protein 5	TXNDC5	1.38574e+08	1.76756e+08	195827174	1.5174e+08	1.5757e+08	1.41388e+08	6.64886e+07	1.0623e+08	7.46308e+07	8.54837e+07	39109804	64737353	12		27.0461	27.3972	27.545	27.177	27.2314	27.0751	25.9866	26.6626	26.1533	26.3491	25.221	25.9481		4.26775	4.36564	4.34448	4.07708	4.26112	3.94327	3.70336	3.99453	3.82246	3.89578	3.29306	3.50651	3.95625				4.8718	5.05999	5.12104	4.76222
P49915	GMP synthase [glutamine-hydrolyzing]	GMPS	2.05428e+07	3.03304e+07	4.23585e+07	3.29567e+07	3.32936e+07	2.98516e+07	4.2419e+07	1.25416e+07	2.98892e+06	9.09073e+06	1.99698e+07	1.12278e+07	12		24.2921	24.8543	25.3361	24.9741	24.9887	24.8313	25.3382	23.5802	21.5112	23.116	24.2513	23.4206		1.51379	1.82272	2.13562	1.87412	2.01845	1.69948	3.05496	0.912134	-0.819608	0.662599	2.32335	0.978992	1.51472				1.72805	2.11262	2.51736	2.18906
Q08426	Peroxisomal bifunctional enzyme	EHHADH	3.13307e+06	2.48996e+07	27804000	2.64621e+07	2.73806e+07	2.47783e+07	3.18208e+07	2.25884e+06	2.29883e+06	2.21105e+06	2.12154e+07	1.91649e+06	12		21.5791	24.5696	24.7288	24.6574	24.7066	24.5626	24.9235	21.1072	21.1325	21.0763	24.3386	20.87		-1.19919	1.53808	1.52827	1.55748	1.73636	1.43075	2.64022	-1.56094	-1.19833	-1.37707	2.41064	-1.57155	0.49456				-1.36892	1.78271	1.80144	1.8192
P78347	General transcription factor II-I	GTF2I	3.00916e+06	1.63421e+07	1.67622e+07	1.52086e+07	9.38932e+06	1.30239e+07	1.68611e+07	2.96658e+06	2.5596e+06	2.99084e+06	6.34428e+06	5.98428e+06	12		21.5209	23.9621	23.9987	23.8584	23.1626	23.6347	24.0072	21.5004	21.2875	21.5121	22.597	22.5127		-1.2574	0.930546	0.798183	0.758437	0.192296	0.502835	1.72395	-1.16772	-1.04332	-0.941248	0.669055	0.0711616	0.103064				-1.43537	1.07855	0.940854	0.885889
Q9Y4W6	AFG3-like protein 2	AFG3L2	1.96692e+07	3.13236e+07	4.9886e+07	37987965	3.93676e+07	4.6262e+07	8.42714e+06	1.22482e+07	7.86658e+06	8.86433e+06	8.63158e+06	1.49533e+07	12		24.2294	24.9007	25.5721	25.179	25.2305	25.4633	23.0066	23.5461	22.9073	23.0796	23.0412	23.834		1.4511	1.86921	2.37161	2.07909	2.26021	2.3315	0.723366	0.877973	0.576502	0.626214	1.11322	1.39237	1.4727				1.65649	2.1665	2.79552	2.42847
P11388	DNA topoisomerase 2-alpha	TOP2A	7.53315e+06	9.67352e+06	8.33594e+06	6.46126e+06	8.81837e+06	7.31931e+06	921867	2.56769e+06	1.21817e+06	738114	1.02222e+06	1.23907e+06	12		22.8448	23.2056	22.9909	22.6234	23.0721	22.8033	19.8142	21.292	20.2163	19.4935	19.9633	20.2408		0.0664899	0.17407	-0.20961	-0.476564	0.101786	-0.328545	-2.46905	-1.37605	-2.11452	-2.95988	-1.9647	-2.20076	-1.14644				0.0759008	0.201755	-0.247076	-0.556649
P48506	Glutamate--cysteine ligase catalytic subunit	GCLC	7.27631e+07	1.0324e+08	104549335	1.04784e+08	9.70405e+07	1.11638e+08	1.01616e+07	6.82506e+07	1.57205e+07	17051792	5.48922e+06	4.73011e+07	12		26.1167	26.6214	26.6396	26.6428	26.5321	26.7343	23.2766	26.0243	23.9061	24.0234	22.3882	25.4954		3.33837	3.58989	3.43909	3.5429	3.56179	3.60243	0.993373	3.35625	1.57534	1.57005	0.4602	3.05379	2.67362				3.81088	4.16085	4.0538	4.13827
P11766	Alcohol dehydrogenase class-3	ADH5	5.05155e+07	7.47623e+07	9.9214e+07	8.62225e+07	6.69675e+07	8.15013e+07	4.57231e+07	8.69893e+07	39543122	4.78579e+07	3.05772e+07	5.59141e+07	12		25.5902	26.1558	26.564	26.3616	25.997	26.2803	25.4464	26.3743	25.2369	25.5123	24.866	25.7367		2.81189	3.12427	3.36352	3.26161	3.02666	3.1485	3.16317	3.70625	2.90612	3.05889	2.93799	3.29512	3.15033				3.20988	3.62117	3.96473	3.80972
P40227	T-complex protein 1 subunit zeta	CCT6A	1.08618e+08	1.35385e+08	1.27689e+08	1.51623e+08	1.22196e+08	1.46082e+08	7.04275e+07	8.39845e+07	4.94726e+07	6.36581e+07	4.87505e+07	4.67581e+07	12		26.6947	27.0125	26.9281	27.1759	26.8646	27.1222	26.0696	26.3236	25.5601	25.9238	25.5389	25.4787		3.91636	3.98095	3.72754	4.07596	3.89433	3.99038	3.78639	3.65553	3.22932	3.47047	3.61095	3.03713	3.69794				4.47067	4.61411	4.39382	4.76091
Q15046	Lysine--tRNA ligase	KARS	7.12454e+07	5.7897e+07	7.48584e+07	6.999e+07	6.43965e+07	5.58731e+07	3.11079e+07	6.02273e+07	34147535	3.52067e+07	1.12192e+07	3.5785e+07	12		26.0863	25.787	26.1577	26.0606	25.9405	25.7357	24.8908	25.8439	25.0253	25.0693	23.4195	25.0929		3.30796	2.75544	2.95714	2.9607	2.97018	2.60383	2.60753	3.17583	2.69448	2.61598	1.4915	2.65127	2.73265				3.77616	3.19369	3.48571	3.45823
Q13283	Ras GTPase-activating protein-binding protein 1	G3BP1	4.03902e+07	3.41691e+07	8.7959e+07	35329169	3.64479e+07	4.26451e+07	3.0192e+07	3.20041e+07	1.99547e+07	2.30332e+07	9.72339e+06	1.71583e+07	12		25.2675	25.0262	26.3903	25.0744	25.1193	25.3459	24.8477	24.9318	24.2502	24.4572	23.213	24.0324		2.48917	1.99465	3.1898	1.97441	2.14904	2.21406	2.56442	2.26366	1.91942	2.00384	1.28506	1.59082	2.13653				2.84148	2.31189	3.75997	2.3062
P17980	26S proteasome regulatory subunit 6A	PSMC3	4.98086e+07	4.42761e+07	5.88254e+07	4.89945e+07	44365095	5.62552e+07	3.40589e+07	4.12687e+07	29637654	3.35637e+07	31600359	3.53479e+07	12		25.5699	25.4	25.8099	25.5461	25.4029	25.7455	25.0215	25.2985	24.8209	25.0004	24.9134	25.0751		2.79156	2.36849	2.60941	2.44617	2.43263	2.61366	2.73828	2.63046	2.49013	2.54703	2.98547	2.63354	2.60723				3.18667	2.74519	3.07583	2.85724
P30153	Serine/threonine-protein phosphatase 2A 65 kDa regulatory subunit A alpha isoform	PPP2R1A	2.45082e+07	6.19585e+07	7.39042e+07	6.46251e+07	6.83284e+07	6.37584e+07	3.45215e+07	2.20458e+07	1.26453e+07	1.09292e+07	3.18032e+07	2.00695e+07	12		24.5468	25.8848	26.1392	25.9456	26.026	25.9261	25.041	24.394	23.5921	23.3817	24.9227	24.2585		1.76843	2.85326	2.93863	2.84564	3.05569	2.79429	2.75774	1.72591	1.2613	0.928314	2.9947	1.81692	2.31174				2.01873	3.30706	3.46389	3.32384
P15559	NAD(P)H dehydrogenase [quinone] 1	NQO1	2.44438e+08	2.66272e+08	2.50771e+08	3.44689e+08	3.24394e+08	3.65814e+08	1.0325e+08	1.94722e+08	111655784	1.25585e+08	9.04398e+07	1.46193e+08	12		27.8649	27.9883	27.9018	28.3607	28.2732	28.4465	26.6216	27.5368	26.7345	26.9041	26.4305	27.1233		5.08656	4.95678	4.70127	5.26077	5.30288	5.31471	4.33832	4.86875	4.40368	4.45072	4.50249	4.68171	4.82239				5.8065	5.74515	5.5416	6.14483
Q12797	Aspartyl/asparaginyl beta-hydroxylase	ASPH	5.71917e+07	6.62137e+07	1.06646e+08	1.00987e+08	7.57868e+07	1.0524e+08	3.14165e+07	5.15452e+07	4.98042e+07	4.3678e+07	2.3139e+07	31315811	12		25.7693	25.9806	26.6683	26.5896	26.1754	26.6491	24.905	25.6193	25.5698	25.3804	24.4638	24.9004		2.99097	2.94909	3.46773	3.48964	3.20515	3.51728	2.62178	2.95125	3.23896	2.92704	2.53585	2.4588	3.02946				3.4143	3.41813	4.08757	4.07606
A1L0T0	Acetolactate synthase-like protein	ILVBL	2.00185e+07	3.2962e+07	3.42624e+07	2.37202e+07	3.58346e+06	2.42974e+07	1.73435e+07	1.50404e+07	1.58723e+07	1.91582e+07	1.96502e+07	1.2322e+07	12		24.2548	24.9743	25.0301	24.4996	21.7729	24.5343	24.0479	23.8423	23.92	24.1915	24.228	23.5547		1.4765	1.94276	1.8296	1.39967	-1.19737	1.40248	1.76465	1.17425	1.58921	1.73809	2.30007	1.11315	1.37775				1.68548	2.25175	2.15663	1.63488
Q9H6R3	Acyl-CoA synthetase short-chain family member 3, mitochondrial	ACSS3	6.97941e+07	1.08725e+08	2.38963e+07	1.25526e+08	1.26166e+08	3.05017e+07	1.14854e+07	7.88591e+07	1.26266e+07	7.69813e+07	6.09664e+06	7.25148e+07	12		26.0566	26.6961	24.5103	26.9034	26.9107	24.8624	23.4533	26.2328	23.59	26.198	22.5396	26.1118		3.27827	3.66457	1.30976	3.80346	3.94045	1.73056	1.17006	3.56468	1.25916	3.74464	0.611613	3.67019	2.64562				3.74227	4.24741	1.54388	4.44262
Q14571	Inositol 1,4,5-trisphosphate receptor type 2	ITPR2	4.10405e+06	821421	1.4128e+06	256371	3.4023e+06	800285	3.00249e+06	2.01729e+06	6.73588e+06	1.38299e+07	5.50694e+06	1.44219e+06	12		21.9686	19.6478	20.4301	17.9679	21.6981	19.6102	21.5177	20.944	22.6834	23.7213	22.3928	20.4598		-0.809714	-3.38378	-2.7704	-5.13207	-1.27221	-3.52167	-0.765518	-1.7241	0.352634	1.26792	0.464851	-1.98176	-1.60632				-0.924319	-3.92196	-3.2656	-5.9945
Q03252	Lamin-B2	LMNB2	2.35156e+07	3.24161e+07	2.71192e+07	2.3995e+07	2.81981e+07	2.90098e+07	1.97656e+07	2.28146e+07	2.75432e+07	3.18384e+07	2.10076e+07	3.4669e+07	12		24.4871	24.9502	24.6928	24.5162	24.7491	24.79	24.2365	24.4435	24.7152	24.9243	24.3244	25.0471		1.70878	1.91867	1.49229	1.41628	1.7788	1.65821	1.95324	1.77537	2.38439	2.4709	2.39644	2.60556	1.96324				1.95064	2.22383	1.75902	1.65428
P30084	Enoyl-CoA hydratase, mitochondrial	ECHS1	1.06755e+08	193176001	2.43257e+08	2.11818e+08	1.71536e+08	1.58916e+08	5.05058e+07	9.91809e+07	8.29436e+07	1.04589e+08	6.73758e+07	8.57246e+07	12		26.6697	27.5253	27.8579	27.6583	27.3539	27.2437	25.5899	26.5636	26.3056	26.6402	26.0057	26.3532		3.8914	4.4938	4.65738	4.55831	4.38364	4.11187	3.3067	3.89547	3.97483	4.18679	4.07776	3.91162	4.1208				4.44218	5.20853	5.48987	5.32431
P46459	Vesicle-fusing ATPase	NSF	2.46342e+07	3.01793e+07	3.36787e+07	3.15139e+07	3.11393e+07	3.316e+07	1.05664e+07	2.72719e+07	18240419	2.36044e+07	1.20576e+07	2.08469e+07	12		24.5542	24.8471	25.0053	24.9095	24.8922	24.9829	23.333	24.7009	24.1206	24.4926	23.5234	24.3133		1.77583	1.81551	1.80481	1.80954	1.92194	1.85112	1.04973	2.03283	1.78983	2.03919	1.59547	1.87175	1.7798				2.02717	2.10427	2.12741	2.11362
P01892	HLA class I histocompatibility antigen, A-2 alpha chain	HLA-A	2.0591e+07	2.79661e+07	33649151	2.61519e+07	2.43987e+07	2.58256e+07	2.08094e+07	1.15891e+07	1.5899e+07	1.74925e+07	1.67585e+07	2.47576e+07	12		24.2955	24.7372	25.0041	24.6404	24.5403	24.6223	24.3107	23.4663	23.9224	24.0602	23.9984	24.5614		1.51718	1.70563	1.80354	1.54047	1.57	1.49048	2.02749	0.798179	1.59163	1.60687	2.07042	2.11979	1.65347				1.73192	1.97691	2.12592	1.79934
P05534	HLA class I histocompatibility antigen, A-24 alpha chain	HLA-A	2.76474e+07	3.74426e+07	4.12037e+07	3.97334e+07	3.11848e+07	3.53559e+07	1.21677e+07	2.2924e+07	1.56596e+07	1.56133e+07	1.6533e+07	2.3976e+07	12		24.7206	25.1582	25.2963	25.2438	24.8943	25.0754	23.5366	24.4504	23.9005	23.8963	23.9788	24.5151		1.94231	2.12664	2.09575	2.1439	1.92405	1.94362	1.25331	1.78227	1.56974	1.44291	2.05087	2.0735	1.8624				2.21722	2.46487	2.47035	2.50418
O75694	Nuclear pore complex protein Nup155	NUP155	2.02135e+07	1.18536e+07	1.79447e+07	1.35483e+07	2.00739e+07	13794150	5.22923e+06	1.67553e+07	2.5973e+07	2.67965e+07	6.13454e+06	2.35771e+07	12		24.2688	23.4988	24.0971	23.6916	24.2588	23.7176	22.3182	23.9981	24.6305	24.6755	22.5485	24.4909		1.49049	0.467278	0.896533	0.591664	1.28852	0.585732	0.0349214	1.33002	2.29971	2.22218	0.620555	2.0493	1.15641				1.70145	0.541597	1.05678	0.691091
Q9HAV4	Exportin-5	XPO5	8.66488e+06	9.75548e+06	1.11825e+08	7.60459e+06	8.89097e+07	7.36538e+06	9.46117e+06	8.60513e+06	6.26147e+06	6.36702e+06	8.84555e+06	4.15783e+06	12		23.0467	23.2178	26.7367	22.8584	26.4058	22.8123	23.1736	23.0368	22.5781	22.6022	23.0765	21.9874		0.268415	0.186242	3.53615	-0.241508	3.43554	-0.319494	0.890342	0.368676	0.247268	0.148821	1.14855	-0.454186	0.767902				0.306406	0.215863	4.16822	-0.282092
Q9Y265	RuvB-like 1	RUVBL1	4.05496e+07	5.02608e+07	68304533	5.43307e+07	5.13403e+07	4.2803e+07	2.24957e+07	4.03365e+07	36433249	3.92298e+07	2.1881e+07	3.80583e+07	12		25.2732	25.5829	26.0255	25.6953	25.6136	25.3512	24.4231	25.2656	25.1188	25.2254	24.3832	25.1817		2.49485	2.55139	2.82495	2.59532	2.6433	2.21939	2.1399	2.59749	2.78795	2.77208	2.45521	2.74013	2.5685				2.84797	2.95718	3.3299	3.03145
P49755	Transmembrane emp24 domain-containing protein 10	TMED10	1.1235e+08	1.30418e+08	1.11688e+08	8.51199e+07	1.00514e+08	1.76739e+08	6.34519e+07	1.07239e+08	8.59096e+07	9.73011e+07	8.01349e+07	8.68607e+07	12		26.7434	26.9586	26.7349	26.343	26.5828	27.397	25.9192	26.6763	26.3563	26.536	26.2559	26.3722		3.96509	3.92702	3.53438	3.24305	3.61253	4.26522	3.63591	4.00816	4.02551	4.08259	4.32796	3.93062	3.87984				4.5263	4.55161	4.16613	3.78803
O43776	Asparagine--tRNA ligase, cytoplasmic	NARS	7.81545e+07	1.11389e+08	9.42398e+07	9.53308e+07	2.79335e+07	1.08632e+08	1.29123e+07	6.75681e+07	1.45611e+07	3.64284e+07	1.10215e+07	3.17795e+07	12		26.2198	26.731	26.4898	26.5064	24.7355	26.6949	23.6222	26.0098	23.7956	25.1186	23.3938	24.9216		3.44149	3.69949	3.28931	3.40649	1.7652	3.56306	1.339	3.34175	1.46481	2.66519	1.46585	2.48001	2.66014				3.92859	4.28788	3.87726	3.97894
Q15437	Protein transport protein Sec23B	SEC23B	1.7568e+07	1.64404e+07	8.73145e+06	1.7035e+07	5.93143e+06	3.04461e+07	7.75586e+06	2.31187e+07	1.91092e+07	2.73783e+07	6.00578e+06	1.68873e+07	12		24.0664	23.9707	23.0578	24.022	22.4999	24.8598	22.8869	24.4626	24.1878	24.7065	22.5179	24.0094		1.28812	0.939204	-0.142733	0.922048	-0.470345	1.72793	0.60361	1.79447	1.85696	2.25317	0.589951	1.56785	1.07752				1.47043	1.08858	-0.168246	1.07699
P42166	Lamina-associated polypeptide 2, isoform alpha	TMPO	21382499	3.1079e+07	1.94887e+07	2.06244e+07	2.43648e+07	2.65128e+07	1.23786e+08	18640126	1.26239e+07	1.32823e+07	1.40016e+08	1.17113e+07	12		24.3499	24.8894	24.2161	24.2978	24.5383	24.6602	26.8833	24.1519	23.5897	23.663	27.061	23.4814		1.57159	1.8579	1.01561	1.1979	1.568	1.52836	4.60003	1.48382	1.25885	1.20963	5.13305	1.03982	1.95538				1.79403	2.15339	1.19715	1.3992
O95394	Phosphoacetylglucosamine mutase	PGM3	3.20473e+07	8.91081e+07	9.86802e+07	1.19381e+08	9.68422e+07	1.07026e+08	1.46244e+07	2.6371e+07	2.54915e+07	2.59054e+07	9.94592e+06	1.96195e+07	12		24.9337	26.4091	26.5563	26.831	26.5291	26.6734	23.8019	24.6524	24.6035	24.6268	23.2457	24.2258		2.15537	3.37751	3.35573	3.73105	3.55884	3.54157	1.51863	1.98436	2.27271	2.17338	1.3177	1.7842	2.56426				2.46043	3.9147	3.95555	4.35804
Q9H0D6	5'-3' exoribonuclease 2	XRN2	1.51639e+07	3.33793e+07	1.15203e+07	1.30076e+07	1.77899e+07	2.42147e+07	4.79462e+06	9.44739e+06	1.98295e+07	2.18112e+07	4.64534e+06	2.16894e+07	12		23.8541	24.9924	23.4577	23.6328	24.0846	24.5294	22.193	23.1715	24.2411	24.3786	22.1474	24.3705		1.0758	1.96091	0.257156	0.532902	1.11426	1.39756	-0.0902611	0.503395	1.91034	1.9252	0.219382	1.9289	1.0613				1.22807	2.27279	0.303121	0.622454
O15371	Eukaryotic translation initiation factor 3 subunit D	EIF3D	54295676	3.45512e+07	42321113	4.25164e+07	6.9159e+07	3.74975e+07	22508219	4.0415e+07	6.15123e+07	4.62747e+07	1.74671e+07	5.6897e+07	12		25.6943	25.0422	25.3349	25.3415	26.0434	25.1603	24.4239	25.2684	25.8744	25.4637	24.0581	25.7618		2.916	2.01069	2.13435	2.24157	3.07312	2.02847	2.1407	2.6003	3.54357	3.01035	2.13016	3.32026	2.5958				3.32872	2.33049	2.51586	2.61826
O75691	Small subunit processome component 20 homolog	UTP20	5.46085e+06	2.60288e+06	1.84961e+07	4.52681e+06	2295179	1.78198e+07	6.11052e+06	5.10339e+06	1.85029e+07	1.91651e+07	7.56397e+06	1.41661e+07	12		22.3807	21.3117	24.1407	22.1101	21.1302	24.087	22.5429	22.283	24.1412	24.192	22.8507	23.7559		-0.397638	-1.71986	0.940197	-0.989884	-1.84012	0.95516	0.259619	-0.385065	1.81044	1.73861	0.922743	1.31435	0.21738				-0.453919	-1.9934	1.10825	-1.15623
P33991	DNA replication licensing factor MCM4	MCM4	1.15391e+07	1.64416e+07	1.51611e+07	1.98969e+07	9.11479e+06	1.54941e+07	3.05062e+06	1.00251e+07	1.12708e+07	9.80373e+06	2.33927e+06	1.09063e+07	12		23.46	23.9708	23.8539	24.246	23.1198	23.8852	21.5407	23.2571	23.4261	23.2249	21.1576	23.3787		0.681698	0.939306	0.65335	1.14609	0.149484	0.753392	-0.742571	0.58903	1.09528	0.771534	-0.770341	0.937077	0.516944				0.778183	1.0887	0.770133	1.33869
P27695	DNA-(apurinic or apyrimidinic site) lyase	APEX1	5.83222e+07	6.36337e+07	7.06652e+07	5.92064e+07	999289	76975426	3.5604e+07	4.47361e+07	2.35575e+07	2.42367e+07	14958973	2.20537e+07	12		25.7975	25.9233	26.0745	25.8192	19.9305	26.1979	25.0855	25.4149	24.4897	24.5307	23.8345	24.3945		3.01921	2.89175	2.87397	2.7193	-3.03975	3.06607	2.80229	2.74685	2.15888	2.07732	1.90654	1.95293	2.09795				3.44654	3.35167	3.38768	3.17627
Q15019	Septin-2	SEPTIN2	2.05105e+07	3.91714e+07	3.9691e+07	4.3632e+07	3.68208e+07	3.61798e+07	2.17226e+07	1.9695e+07	1.59503e+07	1.56111e+07	1.48232e+07	1.44873e+07	12		24.2899	25.2233	25.2423	25.3789	25.134	25.1087	24.3727	24.2313	23.9271	23.8961	23.8214	23.7883		1.51152	2.19176	2.04179	2.27893	2.16372	1.97686	2.08945	1.56324	1.59627	1.4427	1.89338	1.3467	1.84136				1.72546	2.54035	2.40674	2.6619
P00734	Prothrombin	F2	8.42057e+06	1.53863e+07	1.74939e+07	1.47666e+07	5.58389e+06	1.92535e+07	8.187e+06	7.12434e+06	7.43414e+06	6.84628e+06	7.00687e+06	8.13799e+06	12		23.0055	23.8751	24.0603	23.8158	22.4128	24.1986	22.9649	22.7643	22.8257	22.7069	22.7403	22.9562		0.227154	0.843604	0.859824	0.715886	-0.557456	1.0668	0.681659	0.0962349	0.494932	0.253522	0.81237	0.514657	0.500765				0.259305	0.977777	1.01351	0.836188
Q9NTK5	Obg-like ATPase 1	OLA1	8.37499e+07	64020187	5.75632e+07	5.83374e+07	4.22672e+07	5.99448e+07	4.84618e+07	4.68434e+07	2.28876e+07	3.61639e+07	3.39437e+07	3.72152e+07	12		26.3196	25.932	25.7786	25.7979	25.333	25.8371	25.5303	25.4813	24.4481	25.108	25.0166	25.1494		3.54125	2.90048	2.57812	2.69797	2.36274	2.70531	3.2471	2.81325	2.11726	2.65468	3.08867	2.7078	2.78455				4.04247	3.3618	3.03895	3.15135
P04040	Catalase	CAT	2.81185e+07	4.06301e+07	4.84008e+07	4.50389e+07	4.35767e+07	7.34225e+07	6.69281e+06	2.26758e+07	3.06475e+07	2.68129e+07	5.79672e+06	1.98896e+07	12		24.745	25.276	25.5285	25.4247	25.3771	26.1297	22.6742	24.4347	24.8693	24.6764	22.4668	24.2455		1.96669	2.24451	2.328	2.32472	2.40676	2.9979	0.390936	1.76656	2.53847	2.22306	0.538836	1.80393	1.96086				2.24505	2.60149	2.74412	2.71538
P10909	Clusterin	CLU	7.79222e+07	6.14675e+07	8.95282e+07	77235714	7.29155e+07	8.0789e+07	6.92607e+07	91265354	1.22976e+08	1.36609e+08	1.12522e+08	1.47546e+08	12		26.2155	25.8733	26.4158	26.2028	26.1197	26.2677	26.0455	26.4436	26.8738	27.0255	26.7456	27.1366		3.4372	2.84178	3.21531	3.10282	3.14943	3.13583	3.76229	3.77547	4.543	4.57211	4.81766	4.695	3.75399				3.92369	3.29376	3.79004	3.62423
Q8NI36	WD repeat-containing protein 36	WDR36	8.32045e+06	1.9689e+07	1.7375e+07	1.81761e+07	1.85931e+07	1.74966e+07	5.15533e+06	1.88142e+07	1.33444e+07	1.43411e+07	5.98581e+06	6.58221e+06	12		22.9882	24.2309	24.0505	24.1155	24.1483	24.0606	22.2976	24.1653	23.6697	23.7736	22.5131	22.6501		0.209898	1.19935	0.849982	1.01559	1.17797	0.928754	0.0143887	1.49723	1.33893	1.32028	0.585146	0.208555	0.862173				0.239607	1.3901	1.00191	1.18626
Q9Y4F1	FERM, ARHGEF and pleckstrin domain-containing protein 1	FARP1	1.42809e+07	2.83295e+07	3.78562e+07	2.82224e+07	2.75846e+07	35025530	1.12724e+07	1.12331e+07	11118881	1.22206e+07	1.2166e+07	1.19409e+07	12		23.7676	24.7558	25.174	24.7503	24.7174	25.0619	23.4263	23.4213	23.4065	23.5428	23.5364	23.5094		0.989249	1.72426	1.9735	1.65039	1.74706	1.93008	1.14304	0.753165	1.07571	1.08945	1.60839	1.06783	1.39601				1.12927	1.9985	2.32626	1.92773
P32189	Glycerol kinase	GK	2.93719e+07	1.03373e+08	125315578	1.25991e+08	1.31293e+07	140159892	1.73343e+07	3.15777e+07	2.77189e+07	3.3608e+07	2.23861e+07	2.86216e+07	12		24.8079	26.6233	26.901	26.9088	23.6463	27.0625	24.0471	24.9124	24.7244	25.0023	24.4161	24.7706		2.0296	3.59175	3.70047	3.8088	0.675997	3.93068	1.76388	2.24431	2.39356	2.54894	2.48813	2.32902	2.62543				2.31686	4.163	4.36191	4.44886
P14314	Glucosidase 2 subunit beta	PRKCSH	7.50811e+07	83690739	1.19162e+08	8.17026e+07	9.89134e+07	8.78437e+07	4.98208e+07	7.29513e+07	6.52813e+07	7.559e+07	5.22486e+07	5.10293e+07	12		26.1619	26.3186	26.8284	26.2839	26.5597	26.3884	25.5702	26.1204	25.9602	26.1717	25.6389	25.6048		3.38361	3.28702	3.62783	3.18393	3.58937	3.25661	3.287	3.45234	3.62936	3.71832	3.71092	3.16324	3.4408				3.86252	3.80982	4.27629	3.71898
Q13884	Beta-1-syntrophin	SNTB1	1.19001e+07	2.62566e+07	23664655	3.0096e+07	2.53662e+07	2.42003e+07	4.49647e+07	6.01246e+06	1.97596e+07	8.92343e+06	3.43724e+07	5.35863e+06	12		23.5045	24.6462	24.4962	24.8431	24.5964	24.5285	25.4223	22.5195	24.2361	23.0892	25.0347	22.3534		0.726142	1.61464	1.29571	1.74312	1.62611	1.3967	3.13904	-0.148566	1.90525	0.635801	3.10678	-0.0881507	1.41271				0.828919	1.87144	1.52731	2.03604
Q9NYF8	Bcl-2-associated transcription factor 1	BCLAF1	4.28013e+07	5.53724e+07	7.98735e+07	5.58359e+07	5.78638e+07	7.5425e+07	7.7689e+07	2.4442e+07	2.02576e+07	3.00236e+07	6.64848e+07	2.11337e+07	12		25.3512	25.7227	26.2512	25.7347	25.7862	26.1685	26.2112	24.5429	24.272	24.8396	25.9865	24.333		2.57282	2.69112	3.05069	2.63474	2.81586	3.03672	3.92796	1.87477	1.94116	2.38623	4.05855	1.89146	2.74017				2.93697	3.11914	3.59599	3.0775
P08559	Pyruvate dehydrogenase E1 component subunit alpha, somatic form, mitochondrial	PDHA1	1.93478e+07	5.79558e+07	7.96718e+07	6.37602e+07	6.98091e+07	6.52035e+07	1.32748e+07	2.00712e+07	1.12798e+07	9.87453e+06	8.81951e+06	9.05922e+06	12		24.2057	25.7884	26.2476	25.9262	26.0569	25.9584	23.6622	24.2586	23.4272	23.2353	23.0723	23.111		1.42733	2.75691	3.04704	2.8262	3.08662	2.82662	1.37894	1.59054	1.09644	0.781914	1.1443	0.669372	1.88602				1.62935	3.19539	3.59169	3.30114
O00267	Transcription elongation factor SPT5	SUPT5H	1.58122e+07	30300741	1.61676e+07	1.82506e+07	3.00003e+07	1.53184e+07	1.63413e+07	2.6256e+07	2.29146e+07	2.61954e+07	1.20245e+07	1.89859e+07	12		23.9145	24.8528	23.9466	24.1214	24.8385	23.8688	23.962	24.6461	24.4498	24.6428	23.5195	24.1784		1.13621	1.82131	0.746082	1.02149	1.86818	0.73694	1.67877	1.97805	2.11896	2.18944	1.5915	1.73684	1.55198				1.29702	2.11098	0.879441	1.19315
Q9ULV4	Coronin-1C	CORO1C	1.03636e+08	1.0295e+08	153535592	1.37004e+08	9.14524e+07	1.19355e+08	1.09938e+08	4.99722e+07	2.97667e+07	2.96015e+07	6.1238e+07	2.11443e+07	12		26.6269	26.6174	27.194	27.0296	26.4465	26.8307	26.7121	25.5746	24.8272	24.8192	25.8679	24.3338		3.84861	3.58582	3.99347	3.92969	3.47622	3.69886	4.42887	2.90653	2.49639	2.3658	3.93995	1.89218	3.3802				4.39334	4.15614	4.70729	4.59006
P14923	Junction plakoglobin	JUP	5.75583e+07	5.68425e+07	2.84526e+07	9.83216e+07	6.69786e+07	1.05313e+08	1.1346e+07	4.35252e+07	7.96763e+06	6.92023e+07	6.39508e+07	8.13588e+06	12		25.7785	25.7605	24.7621	26.551	25.9972	26.6501	23.4357	25.3753	22.9257	26.0443	25.9305	22.9559		3.00019	2.72893	1.56153	3.45106	3.0269	3.51828	1.15244	2.70726	0.594918	3.59095	4.00249	0.514283	2.48744				3.42483	3.16295	1.84065	4.03099
P46063	ATP-dependent DNA helicase Q1	RECQL	8386768	3.49873e+07	3.71567e+07	2.19784e+07	8.87211e+06	3.6236e+07	6.53611e+06	9.20467e+06	7.29852e+06	8.25497e+06	4.57882e+06	6.43121e+06	12		22.9997	25.0603	25.1471	24.3896	23.0808	25.1109	22.64	23.1339	22.7992	22.9768	22.1265	22.6167		0.221351	2.02879	1.9466	1.28963	0.110552	1.9791	0.356757	0.465845	0.468369	0.523465	0.198575	0.175073	0.813675				0.252681	2.35146	2.29454	1.50635
Q96QK1	Vacuolar protein sorting-associated protein 35	VPS35	2.99916e+07	39175430	5.37775e+07	4.17794e+07	39079384	4.16917e+07	4.92537e+07	3.38859e+07	2.36802e+07	2.55021e+07	2.44659e+07	2.02031e+07	12		24.8381	25.2234	25.6805	25.3163	25.2199	25.3133	25.5537	25.0142	24.4972	24.6041	24.5443	24.2681		2.05972	2.19191	2.47998	2.21634	2.24961	2.18143	3.27049	2.34609	2.16638	2.15075	2.6163	1.82649	2.31296				2.35125	2.54052	2.92326	2.58879
P05091	Aldehyde dehydrogenase, mitochondrial	ALDH2	2.70432e+07	1.01041e+08	115213871	1.04703e+08	5.044e+07	1.02391e+08	2.00415e+07	5.93085e+07	4.46523e+07	4.70024e+07	1.65286e+07	4.30847e+07	12		24.6888	26.5904	26.7797	26.6417	25.5881	26.6095	24.2565	25.8217	25.4122	25.4862	23.9785	25.3607		1.91043	3.55882	3.57922	3.54178	2.61777	3.47769	1.97324	3.15365	3.08143	3.03287	2.05049	2.91909	2.90804				2.18083	4.12484	4.21898	4.13696
O00571	ATP-dependent RNA helicase DDX3X	DDX3X	9.89408e+07	7.41604e+07	86367108	7.61787e+07	7.56913e+07	7.03923e+07	4.67351e+07	8.10666e+07	3.68816e+07	4.20519e+07	4.19822e+07	5.14435e+07	12		26.5601	26.1441	26.364	26.1829	26.1736	26.0689	25.478	26.2726	25.1364	25.3257	25.3233	25.6165		3.78173	3.11261	3.16346	3.08294	3.20333	2.93709	3.19476	3.60451	2.80559	2.8723	3.39531	3.1749	3.19404				4.31699	3.60766	3.72891	3.60101
Q96KP4	Cytosolic non-specific dipeptidase	CNDP2	1.75249e+07	2.98793e+07	3.17966e+07	3.10371e+07	2.93025e+07	3.70012e+07	9.98368e+06	1.68999e+07	6.23019e+06	4.80019e+06	3.37779e+06	1.68632e+06	12		24.0629	24.8326	24.9224	24.8875	24.8045	25.1411	23.2511	24.0105	22.5708	22.1947	21.6876	20.6854		1.28457	1.8011	1.72185	1.78754	1.83423	2.00925	0.967896	1.34242	0.240043	-0.258705	-0.240321	-1.75614	0.894478				1.46639	2.08756	2.02962	2.08793
Q5JRX3	Presequence protease, mitochondrial	PITRM1	1.97935e+07	2.83311e+07	2.87506e+07	2.71617e+07	2.11072e+07	2.20276e+07	4.19556e+06	2.46719e+07	1.56441e+07	1.85801e+07	4.22502e+06	1.63611e+07	12		24.2385	24.7559	24.7771	24.6951	24.3312	24.3928	22.0004	24.5564	23.8991	24.1473	22.0105	23.9638		1.46019	1.72434	1.57657	1.59512	1.36094	1.26099	-0.282813	1.88828	1.56831	1.69389	0.0825571	1.52218	1.28755				1.66686	1.9986	1.85837	1.86318
P02679	Fibrinogen gamma chain	FGG	2.50311e+07	2.53834e+07	37062272	3.72906e+07	27205753	4.48404e+07	3.04011e+07	2.06588e+07	2.14991e+07	1.84286e+07	2.58359e+07	3.26585e+07	12		24.5772	24.5974	25.1434	25.1523	24.6974	25.4183	24.8576	24.3003	24.3578	24.1354	24.6229	24.961		1.79889	1.56584	1.94292	2.05236	1.72711	2.28648	2.57437	1.63216	2.02697	1.68207	2.6949	2.51937	2.04196				2.0535	1.81489	2.29021	2.39725
Q15084	Protein disulfide-isomerase A6	PDIA6	3.15753e+08	3.42842e+08	4.63558e+08	3.4415e+08	4.19111e+08	2.9345e+08	2.00126e+08	3.08289e+08	2.00475e+08	2.38466e+08	1.38859e+08	1.91628e+08	12		28.2342	28.353	28.7882	28.3585	28.6428	28.1285	27.5763	28.1997	27.5788	27.8292	27.049	27.5137		5.45589	5.32143	5.58765	5.25851	5.67246	4.99672	5.29309	5.53162	5.24804	5.37584	5.12107	5.07215	5.32787				6.2281	6.16779	6.58642	6.14219
Q9Y230	RuvB-like 2	RUVBL2	2.43241e+07	3.25283e+07	36535561	4.23932e+07	2.12153e+07	38980493	1.48795e+07	2.87469e+07	2.36075e+07	2.98281e+07	8.62461e+06	2.84973e+07	12		24.5359	24.9552	25.1228	25.3373	24.3386	25.2162	23.8268	24.7769	24.4927	24.8302	23.04	24.7643		1.75755	1.92365	1.92227	2.23738	1.36831	2.08443	1.54358	2.10881	2.16194	2.3768	1.11206	2.32274	1.90996				2.00631	2.2296	2.26587	2.61337
P61221	ATP-binding cassette sub-family E member 1	ABCE1	3.51858e+07	1.5472e+07	1.7326e+07	1.72466e+07	1.4626e+07	1.83964e+07	5.71533e+07	3.34754e+07	2.01025e+07	1.71008e+07	3.80366e+07	2.63675e+07	12		25.0685	23.8832	24.0464	24.0398	23.802	24.1329	25.7683	24.9966	24.2609	24.0276	25.1809	24.6523		2.29016	0.851616	0.845914	0.939857	0.831742	1.0011	3.48509	2.32851	1.93007	1.5742	3.25291	2.21067	1.79515				2.6143	0.987064	0.997117	1.0978
Q86XP3	ATP-dependent RNA helicase DDX42	DDX42	7757077	1.18341e+07	8.93224e+06	1.21125e+07	9.55613e+06	1.09254e+07	1.32575e+07	8.75396e+06	7.27754e+06	8.45733e+06	1.78354e+07	5.5298e+06	12		22.8871	23.4964	23.0906	23.53	23.188	23.3812	23.6603	23.0615	22.795	23.0118	24.0882	22.3988		0.108749	0.464905	-0.109933	0.430044	0.217701	0.249366	1.37707	0.393415	0.464217	0.558404	2.16027	-0.0427879	0.522618				0.124141	0.538847	-0.129583	0.502312
Q9NTI5	Sister chromatid cohesion protein PDS5 homolog B	PDS5B	2.27723e+07	2.57504e+07	2.76283e+07	2.51577e+07	3.6322e+07	2.19933e+07	1.20746e+06	1.21266e+07	6.2689e+06	7.88078e+06	3.14715e+06	6.90714e+06	12		24.4408	24.6181	24.7196	24.5845	25.1143	24.3906	20.2035	23.5317	22.5798	22.9099	21.5856	22.7197		1.66244	1.58655	1.51912	1.48455	2.14404	1.25874	-2.0797	0.863588	0.248979	0.456541	-0.342353	0.278072	0.756714				1.89774	1.83889	1.79065	1.73402
P51572	B-cell receptor-associated protein 31	BCAP31	7.55168e+07	7.63096e+07	7.86694e+07	9.29507e+07	7.27406e+07	7.55304e+07	4.32066e+07	6.76194e+07	5.11652e+07	5.63833e+07	3.97045e+07	4.23855e+07	12		26.1703	26.1854	26.2293	26.47	26.1163	26.1706	25.3647	26.0109	25.6087	25.7488	25.2428	25.3371		3.39196	3.15382	3.02878	3.37001	3.14596	3.03873	3.0815	3.34285	3.27786	3.2954	3.31483	2.89548	3.19477				3.87205	3.65543	3.57015	3.93633
Q8TEM1	Nuclear pore membrane glycoprotein 210	NUP210	5.32449e+07	7.12637e+07	7.87937e+07	6.24538e+07	7.75714e+07	6.84786e+07	3.36536e+07	4.44229e+07	3.38957e+07	3.56633e+07	2.73901e+07	2.63355e+07	12		25.6661	26.0867	26.2316	25.8963	26.209	26.0291	25.0043	25.4048	25.0146	25.0879	24.7072	24.6505		2.88781	3.05513	3.03105	2.79634	3.23873	2.89733	2.72101	2.73671	2.6838	2.63457	2.77918	2.20892	2.80588				3.29654	3.54103	3.57284	3.26625
Q9NY65	Tubulin alpha-8 chain	TUBA8		1.20176e+06	1.01586e+06	1115970			2368968	469101		655574	1.66428e+06		7			20.1967	19.9543	20.0899			21.1758	18.8395		19.3224	20.6665				-2.83482	-3.24625	-3.01008			-1.10742	-3.82855		-3.13097	-1.26151		-2.63137					-3.28569	-3.8265	-3.51591
Q12789	General transcription factor 3C polypeptide 1	GTF3C1	3.84188e+06	2.97473e+06	1.01326e+08	3.95163e+06		1.08446e+06	9.06451e+06	1.40535e+07	1.80111e+07	2.46086e+07	2.0883e+07	5.52315e+07	11		21.8734	21.5043	26.5944	21.914		20.0485	23.1118	23.7444	24.1024	24.5527	24.3158	25.719		-0.904951	-1.52721	3.3939	-1.18593		-3.08328	0.828553	1.07633	1.77158	2.09929	2.38786	3.2774	0.739413				-1.03304	-1.77011	4.00055	-1.38522
P48449	Lanosterol synthase	LSS	2.4003e+07	1.45853e+07	19707536	1.49698e+07	2.34687e+07	1.93833e+07	1.09446e+07	2.12632e+07	1.73404e+07	2.18014e+07	6.52139e+06	2.36948e+07	12		24.5167	23.798	24.2322	23.8356	24.4842	24.2083	23.3837	24.3419	24.0476	24.3779	22.6367	24.4981		1.73838	0.766474	1.03172	0.735609	1.51394	1.07649	1.10047	1.67377	1.71683	1.92455	0.708779	2.05648	1.33696				1.98442	0.88838	1.21614	0.859225
Q9Y3F4	Serine-threonine kinase receptor-associated protein	STRAP	1.62302e+08	2.34125e+08	9.7602e+07	3.10114e+08	3.25796e+08	360350785	2.19839e+07	1.53517e+08	1.04364e+08	1.02415e+08	2.26403e+07	154941594	12		27.2741	27.8027	26.5404	28.2082	28.2794	28.4248	24.3899	27.1938	26.637	26.6099	24.4324	27.2071		4.49577	4.77116	3.33988	5.10827	5.3091	5.29301	2.1067	4.52573	4.30624	4.15649	2.50442	4.76556	4.22353				5.13209	5.53	3.93687	5.9667
Q9Y3I0	tRNA-splicing ligase RtcB homolog	RTCB	5.02595e+07	7.4862e+07	75637816	7.26449e+07	6.50749e+07	6.28831e+07	3.2217e+07	4.41063e+07	2.864e+07	4.31137e+07	2.46436e+07	3.5799e+07	12		25.5829	26.1577	26.1726	26.1144	25.9556	25.9062	24.9413	25.3945	24.7715	25.3616	24.5547	25.0934		2.80456	3.12619	2.97208	3.01441	2.9853	2.77435	2.65807	2.72639	2.44073	2.90828	2.62674	2.65183	2.80741				3.20151	3.6234	3.50333	3.52097
O95373	Importin-7	IPO7	2.46631e+07	2.18728e+07	2.94327e+07	2.62223e+07	2.0636e+07	2.42196e+07	1.59828e+07	1.96663e+07	1.43873e+07	1.72662e+07	9.02905e+06	1.59125e+07	12		24.5558	24.3826	24.8109	24.6443	24.2987	24.5297	23.93	24.2292	23.7783	24.0414	23.1061	23.9237		1.77752	1.3511	1.61039	1.54434	1.32837	1.39785	1.64677	1.56113	1.44749	1.58808	1.17817	1.48207	1.49277				2.0291	1.56598	1.89824	1.80386
Q16822	Phosphoenolpyruvate carboxykinase [GTP], mitochondrial	PCK2	6.76997e+07	3.09592e+07	3.33428e+07	4.68615e+07	6.64052e+07	2.57785e+07	3.12045e+07	60538871	3.67817e+07	5.19393e+07	2.99113e+07	6.64398e+07	12		26.0126	24.8839	24.9909	25.4819	25.9848	24.6197	24.8952	25.8514	25.1325	25.6303	24.8342	25.9855		3.23431	1.85232	1.79035	2.38195	3.0145	1.48784	2.612	3.18327	2.80168	3.17696	2.90622	3.54396	2.66545				3.69209	2.14693	2.11037	2.78223
Q12904	Aminoacyl tRNA synthase complex-interacting multifunctional protein 1	AIMP1	9.50306e+07	103443933	9.37707e+07	8.86588e+07	3.66377e+07	7.29362e+07	1.88162e+07	7.77849e+07	5.76812e+07	6.92873e+07	2.36791e+07	5.79317e+07	12		26.5019	26.6243	26.4826	26.4018	25.1268	26.1201	24.1655	26.213	25.7816	26.0461	24.4971	25.7879		3.72356	3.59273	3.28211	3.30181	2.15653	2.98831	1.88223	3.5449	3.45079	3.59272	2.56914	3.34627	3.11926				4.25058	4.16415	3.86877	3.85667
P08195	4F2 cell-surface antigen heavy chain	SLC3A2	8.4939e+07	1.15248e+08	1.66156e+08	1.50428e+08	1.4872e+08	114224578	3.49462e+07	7.32719e+07	5.07578e+07	7.0895e+07	33037735	1.05799e+08	12		26.3399	26.7802	27.308	27.1645	27.148	26.7673	25.0586	26.1268	25.5971	26.0792	24.9776	26.6567		3.56159	3.74863	4.10744	4.06455	4.17773	3.63548	2.77539	3.45867	3.26632	3.62581	3.04964	4.21516	3.64053				4.06569	4.34483	4.84163	4.74759
Q9BUJ2	Heterogeneous nuclear ribonucleoprotein U-like protein 1	HNRNPUL1	3.27895e+07	3.68564e+07	52420136	4.31725e+07	3.82423e+07	4.59371e+07	9401772	6.79601e+07	1.03903e+08	5.86473e+07	1.76575e+07	7.61683e+07	12		24.9667	25.1354	25.6436	25.3636	25.1887	25.4532	23.1645	26.0182	26.6307	25.8056	24.0738	26.1827		2.1884	2.10387	2.44309	2.26366	2.21837	2.32134	0.881256	3.3501	4.29985	3.3522	2.14581	3.7411	2.60909				2.49814	2.43849	2.87979	2.64406
P62937	Peptidyl-prolyl cis-trans isomerase A	PPIA	5.21449e+08	6.62366e+08	8.14004e+08	7.7037e+08	6.10628e+08	8.18604e+08	4.13443e+08	4.94788e+08	2.80954e+08	3.5601e+08	1.50739e+08	2.16381e+08	12		28.9579	29.3031	29.6005	29.521	29.1857	29.6086	28.6231	28.8822	28.0658	28.4073	27.1675	27.689		6.17962	6.27151	6.39994	6.42103	6.21542	6.47677	6.33987	6.21415	5.73496	5.95397	5.23951	5.24742	6.05785				7.05426	7.26898	7.54389	7.50006
Q9NUQ6	SPATS2-like protein	SPATS2L	27014117	31235393	3.75425e+07	3.67457e+07	27143023	2.84269e+07	1.08839e+07	3.16188e+07	8.96142e+06	1.02995e+07	6.89461e+06	9.93659e+06	12		24.6872	24.8967	25.162	25.1311	24.6941	24.7608	23.3757	24.9143	23.0953	23.2961	22.717	23.2443		1.90888	1.86514	1.9615	2.03112	1.72378	1.62893	1.09245	2.24619	0.764493	0.842698	0.789068	0.802736	1.47142				2.17906	2.16178	2.31211	2.37245
O15230	Laminin subunit alpha-5	LAMA5	1.51794e+07	1.41246e+07	1.42465e+07	1.37057e+07	7.12742e+06	9.44095e+06	1.05742e+07	1.58121e+07	1.28238e+07	1.43842e+07	490694	1.13804e+07	12		23.8556	23.7517	23.7641	23.7083	22.7649	23.1705	23.3341	23.9145	23.6123	23.778	18.9045	23.4401		1.07728	0.720164	0.563577	0.608322	-0.205347	0.0386796	1.05081	1.24644	1.28151	1.32462	-3.02351	0.998468	0.473418				1.22975	0.834704	0.664313	0.710548
Q9UQ35	Serine/arginine repetitive matrix protein 2	SRRM2	3.94902e+07	4.16162e+07	4.05399e+07	3.98056e+07	5.66386e+07	37914115	15943579	3.23658e+07	2.11293e+07	2.64062e+07	5.9508e+06	2.92532e+07	12		25.235	25.3106	25.2728	25.2465	25.7553	25.1762	23.9265	24.948	24.3327	24.6544	22.5047	24.8021		2.45666	2.2791	2.07231	2.14652	2.78499	2.04441	1.64323	2.27988	2.00194	2.201	0.576683	2.36051	2.0706				2.80437	2.64159	2.44273	2.50723
Q00688	Peptidyl-prolyl cis-trans isomerase FKBP3	FKBP3	2.83188e+07	43643220	43213470	3.9944e+07	4.73381e+07	4.37948e+07	1.46831e+07	1.65829e+07	6.40302e+06	8.99032e+06	5.0328e+06	4.04684e+06	12		24.7553	25.3793	25.365	25.2515	25.4965	25.3843	23.8077	23.9832	22.6103	23.0999	22.2629	21.9484		1.97692	2.34771	2.16445	2.15153	2.5262	2.25243	1.52441	1.3151	0.27952	0.646575	0.334961	-0.493222	1.41888				2.25673	2.72111	2.55134	2.51308
P37268	Squalene synthase	FDFT1	5.91216e+07	6.0986e+07	7.89021e+07	6.29002e+07	4.30907e+07	5.98183e+07	1.99168e+07	5.15699e+07	3.96444e+07	4.10729e+07	1.14358e+07	3.00134e+07	12		25.8172	25.862	26.2336	25.9066	25.3609	25.8341	24.2475	25.62	25.2406	25.2917	23.4471	24.8391		3.03885	2.83043	3.03304	2.80661	2.39058	2.70226	1.96424	2.95194	2.90981	2.83832	1.51909	2.39752	2.61522				3.46896	3.28061	3.57518	3.27825
Q96HC4	PDZ and LIM domain protein 5	PDLIM5	1.90603e+07	2.58937e+07	2.69775e+07	2.49271e+07	3.08412e+07	2.47048e+07	1.03107e+07	1.92271e+07	1.87201e+07	18683660	7.56186e+06	1.14162e+07	12		24.1841	24.6261	24.6853	24.5712	24.8784	24.5583	23.2976	24.1966	24.1581	24.1553	22.8503	23.4446		1.40574	1.59456	1.48473	1.47126	1.90806	1.42647	1.01439	1.52855	1.82729	1.70191	0.92234	1.003	1.44069				1.6047	1.84817	1.75012	1.7185
Q7L8L6	FAST kinase domain-containing protein 5, mitochondrial	FASTKD5	1.67765e+07	1.3797e+07	1.38186e+07	1.51631e+07	1.53607e+07	2.14036e+07	4.61529e+06	8.8879e+06	1.10995e+07	1.19227e+07	4.75096e+06	8490747	12		23.9999	23.7178	23.7201	23.8541	23.8727	24.3514	22.138	23.0834	23.404	23.5072	22.1798	23.0175		1.2216	0.686308	0.519581	0.754117	0.902443	1.21953	-0.145255	0.415322	1.07319	1.05384	0.251819	0.575876	0.710698				1.3945	0.795464	0.612454	0.880843
Q16706	Alpha-mannosidase 2	MAN2A1	6.4112e+06	8.25091e+06	1.67381e+07	9.51923e+06	9.36374e+06	1.85096e+07	4.48188e+06	6.74656e+06	8.30601e+06	7.96712e+06	6.71808e+06	1.16473e+07	12		22.6122	22.9761	23.9966	23.1824	23.1587	24.1418	22.0957	22.6857	22.9857	22.9256	22.6796	23.4735		-0.16617	-0.0554185	0.796106	0.0824662	0.188359	1.00995	-0.187573	0.0176324	0.654921	0.47226	0.751648	1.03191	0.383008				-0.189689	-0.0642327	0.938406	0.0963243
Q15738	Sterol-4-alpha-carboxylate 3-dehydrogenase, decarboxylating	NSDHL	2.60133e+07	3.23032e+07	3.73844e+07	3.17515e+07	3.55614e+07	3.79359e+07	1.36295e+07	2.08044e+07	2.59063e+07	2.72513e+07	1.41797e+07	2.36289e+07	12		24.6327	24.9452	25.1559	24.9203	25.0838	25.1771	23.7002	24.3104	24.6268	24.6998	23.7573	24.494		1.85441	1.91363	1.95541	1.82037	2.11351	2.04524	1.41699	1.6423	2.296	2.24646	1.82936	2.05246	1.93218				2.11688	2.21799	2.30493	2.12628
Q9HB71	Calcyclin-binding protein	CACYBP	1.03183e+08	1.19557e+08	1.18494e+08	1.34099e+08	125673406	1.19374e+08	1.91214e+07	1.09726e+08	7.36926e+07	8.05149e+07	13318812	6.47361e+07	12		26.6206	26.8331	26.8202	26.9987	26.9051	26.8309	24.1887	26.7093	26.135	26.2628	23.667	25.9481		3.8423	3.80158	3.61972	3.89877	3.93481	3.69909	1.90544	4.04125	3.80421	3.80939	1.73899	3.50648	3.46684				4.38613	4.40621	4.26672	4.55394
P52597	Heterogeneous nuclear ribonucleoprotein F	HNRNPF	7.1708e+07	7.58597e+07	7.77103e+07	5.86041e+07	7.54142e+07	6.95547e+07	4.93999e+07	7.16258e+07	6.26464e+07	7.28526e+07	4.56862e+07	6.42508e+07	12		26.0956	26.1768	26.2116	25.8045	26.1683	26.0516	25.558	26.094	25.9007	26.1185	25.4453	25.9372		3.3173	3.14529	3.01108	2.70455	3.19804	2.91982	3.27476	3.42589	3.56993	3.66511	3.51729	3.49563	3.27039				3.78682	3.64554	3.54929	3.15904
P19623	Spermidine synthase	SRM	4.20572e+07	7.01964e+07	7.57036e+07	8.07418e+07	6.51474e+07	6.55876e+07	3.45554e+07	4.37091e+07	2.63139e+07	2.51098e+07	1.82447e+07	3.03196e+07	12		25.3259	26.0649	26.1739	26.2668	25.9572	25.9669	25.0424	25.3814	24.6493	24.5817	24.121	24.8537		2.54752	3.03335	2.97333	3.16687	2.98691	2.8351	2.75916	2.71334	2.31852	2.12838	2.19301	2.41217	2.6723				2.90809	3.5158	3.5048	3.69904
P07099	Epoxide hydrolase 1	EPHX1	4.52712e+07	6.34926e+07	6.68131e+07	6.67212e+07	6.75379e+07	7.07567e+07	1.17803e+07	2.22681e+07	3.14149e+07	3.06093e+07	1.86068e+07	2.85505e+07	12		25.4321	25.9201	25.9936	25.9916	26.0092	26.0764	23.4899	24.4085	24.9049	24.8675	24.1493	24.767		2.65376	2.88854	2.7931	2.89169	3.0389	2.94454	1.20662	1.74038	2.57414	2.4141	2.22135	2.32543	2.47438				3.02937	3.34796	3.29236	3.37763
P48444	Coatomer subunit delta	ARCN1	2.71059e+07	3.16057e+07	4.17643e+07	34415232	3.18125e+07	2.48771e+07	3.88873e+07	2.45928e+07	1.38671e+07	1.69881e+07	4.48948e+07	1.41491e+07	12		24.6921	24.9137	25.3158	25.0365	24.9231	24.5683	25.2128	24.5517	23.7252	24.018	25.42	23.7542		1.91377	1.88214	2.11524	1.9366	1.9528	1.4365	2.92955	1.88364	1.39436	1.56466	3.49207	1.31262	1.9845				2.18464	2.18149	2.49333	2.26203
Q14126	Desmoglein-2	DSG2	1.17562e+07	18075040	1.97034e+07	1.83612e+07	1.97152e+07	2.63442e+07	2.53205e+07	1.18766e+07	2.76765e+06	8.78783e+06	2.44887e+07	8.00601e+06	12		23.4869	24.1075	24.2319	24.1302	24.2328	24.651	24.5938	23.5016	21.4002	23.0671	24.5456	22.9327		0.708582	1.07596	1.03142	1.03021	1.26251	1.51916	2.31056	0.833533	-0.930572	0.613709	2.61764	0.491068	1.04698				0.808872	1.24708	1.21578	1.20333
Q15459	Splicing factor 3A subunit 1	SF3A1	994474		2.04071e+06	2507120	1.22466e+06	1.21374e+06	3.98806e+06				7.06718e+06	991287	8		19.9236		20.9606	21.2576	20.2239	20.211	21.9273				22.7527	19.9189		-2.85476		-2.23988	-1.84235	-2.74635	-2.9208	-0.355987				0.824734	-2.52264	-1.83225				-3.25881		-2.64025	-2.15195
Q14376	UDP-glucose 4-epimerase	GALE	6.23962e+07	1.05669e+08	1.08856e+08	7.59713e+07	8.09362e+07	6.07323e+07	4.85937e+07	6.43496e+07	3.12262e+07	5.43201e+07	4.66217e+07	6.11168e+07	12		25.895	26.655	26.6978	26.179	26.2703	25.856	25.5343	25.9394	24.8963	25.695	25.4745	25.8651		3.11662	3.62344	3.49732	3.079	3.29999	2.72414	3.25102	3.27134	2.56545	3.24162	3.54653	3.42348	3.22				3.55774	4.19973	4.12245	3.59642
Q12769	Nuclear pore complex protein Nup160	NUP160	24873789	4.0905e+07	4.68221e+07	5.0712e+07	4.73365e+07	4.62643e+07	2.10235e+07	2.63526e+07	2.26482e+07	2.54913e+07	1.6357e+07	2.03142e+07	12		24.5681	25.2858	25.4807	25.5958	25.4965	25.4634	24.3255	24.6514	24.4329	24.6035	23.9634	24.276		1.78979	2.25423	2.28016	2.49588	2.52616	2.33157	2.04225	1.98335	2.10209	2.15013	2.03544	1.8344	2.15212				2.04311	2.61276	2.68773	2.9153
Q6P996	Pyridoxal-dependent decarboxylase domain-containing protein 1	PDXDC1	9.51405e+06	1.51004e+07	27384706	3.7334e+07	1.4236e+07	2.28315e+07	1.46745e+07	1.77695e+07	7.15621e+06	6.19332e+06	1.29755e+07	1.99666e+07	12		23.1816	23.8481	24.7069	25.154	23.763	24.4445	23.8068	24.0829	22.7708	22.5623	23.6293	24.2511		0.403296	0.816546	1.50634	2.05404	0.792742	1.3127	1.52356	1.41481	0.439961	0.108915	1.70132	1.8095	1.15698				0.460378	0.946416	1.77559	2.39921
Q9NY33	Dipeptidyl peptidase 3	DPP3	1.60495e+07	1.79051e+07	1.94856e+07	1.88589e+07	1.63888e+07	15245813	1.09734e+06	8.72071e+06	2.00014e+07	1.71437e+06	241906	1.59519e+06	12		23.936	24.0939	24.2159	24.1687	23.9662	23.8619	20.0656	23.056	24.2536	20.7092	17.8841	20.6053		1.1577	1.06233	1.01538	1.06879	0.995912	0.730088	-2.21767	0.387925	1.92279	-1.74412	-4.04388	-1.83629	-0.125087				1.32155	1.23129	1.19687	1.2484
Q14258	E3 ubiquitin/ISG15 ligase TRIM25	TRIM25	7.00283e+07	9.63333e+07	9.28661e+07	7.93792e+07	2.20633e+07	7.03137e+07	7.04667e+06	6.70534e+07	1.02236e+07	1.13138e+07	6.51898e+06	1.06557e+07	12		26.0614	26.5215	26.4686	26.2423	24.3951	26.0673	22.7485	25.9988	23.2854	23.4316	22.6362	23.3451		3.2831	3.48999	3.26812	3.14231	1.42485	2.93548	0.465265	3.33072	0.954593	0.97822	0.708245	0.903531	2.0737				3.74778	4.04507	3.85229	3.67036
P49736	DNA replication licensing factor MCM2	MCM2	2.29321e+07	9.23645e+06	3.64355e+07	38380239	4.49711e+06	8.20472e+06	3.11609e+06	4.97124e+06	2.28669e+06	4.1119e+06	1.90936e+06	3.25298e+06	12		24.4509	23.1389	25.1188	25.1939	22.1006	22.968	21.5713	22.2452	21.1248	21.9714	20.8647	21.6333		1.67254	0.107368	1.91832	2.09391	-0.869729	-0.163798	-0.711939	-0.422914	-1.20598	-0.481992	-1.06331	-0.808256	0.00535159				1.90926	0.124445	2.26121	2.44579
P02675	Fibrinogen beta chain	FGB	4.2332e+06	6.84908e+06	7.23411e+06	8.12522e+06	8.10944e+06	9.42439e+06	5.9957e+06	2.95864e+06	1.86682e+06	815070	5.17162e+06	4.79485e+06	12		22.0133	22.7075	22.7864	22.954	22.9512	23.168	22.5155	21.4965	20.8322	19.6366	22.3022	22.1931		-0.765016	-0.324062	-0.414139	-0.145971	-0.0191224	0.0361466	0.232253	-1.17159	-1.49865	-2.8168	0.374214	-0.248531	-0.563439				-0.873295	-0.375603	-0.488164	-0.170501
P27635	60S ribosomal protein L10	RPL10	1.38356e+08	1.96573e+08	1.37762e+08	2.0005e+08	1.34854e+08	1.9081e+08	7.58293e+07	1.20736e+08	1.06513e+08	1.15147e+08	5.39037e+07	1.07072e+08	12		27.0438	27.5505	27.0376	27.5758	27.0068	27.5076	26.1763	26.8473	26.6665	26.7789	25.6839	26.674		4.26547	4.51895	3.83708	4.47584	4.03653	4.37574	3.89301	4.17919	4.33565	4.32553	3.75591	4.23243	4.18594				4.8692	5.23768	4.52294	5.22798
P52209	6-phosphogluconate dehydrogenase, decarboxylating	PGD	1.74837e+08	1.74619e+08	2.47331e+08	210418872	1.81932e+08	193186056	1.36801e+08	1.96002e+08	8.8797e+07	9.41107e+07	3.80871e+07	4.92628e+07	12		27.3814	27.3796	27.8819	27.6487	27.4388	27.5254	27.0275	27.5463	26.404	26.4879	25.1828	25.554		4.6031	4.34809	4.68134	4.54874	4.46853	4.39359	4.74426	4.8782	4.0732	4.03449	3.25483	3.11241	4.26173				5.25461	5.03965	5.51811	5.31314
Q15691	Microtubule-associated protein RP/EB family member 1	MAPRE1	3.631e+07	5.72552e+07	5.57704e+07	5.1912e+07	5.61302e+07	48708146	4.06172e+07	24782753	2.40297e+07	2.36838e+07	3.94802e+07	1.68944e+07	12		25.1139	25.7709	25.733	25.6296	25.7423	25.5377	25.2756	24.5628	24.5183	24.4974	25.2346	24.01		2.33553	2.73936	2.53247	2.52962	2.77198	2.40584	2.99234	1.89474	2.18751	2.04403	3.30666	1.56846	2.44238				2.6661	3.17505	2.98514	2.95471
Q9UJS0	Calcium-binding mitochondrial carrier protein Aralar2	SLC25A13	4.96362e+07	6.25161e+07	6.74446e+07	6.87095e+07	8.33391e+07	8.53616e+07	1.13165e+07	3.36012e+07	2.56021e+07	2.78272e+07	1.75009e+07	4.21627e+07	12		25.5649	25.8977	26.0072	26.034	26.3125	26.3471	23.4319	25.002	24.6098	24.73	24.0609	25.3295		2.78656	2.86618	2.80668	2.93406	3.3422	3.21526	1.14868	2.33392	2.27896	2.27663	2.13295	2.88788	2.58416				3.18096	3.32204	3.30836	3.42712
Q9UNX4	WD repeat-containing protein 3	WDR3	4.37501e+06	5.25119e+06	5.98011e+06	5.93082e+06	4.13702e+06	4.23019e+06	4.61338e+06	4.45524e+06	17264636	2.22288e+07	4.46418e+06	3.95267e+07	12		22.0609	22.3242	22.5117	22.4998	21.9802	22.0123	22.1374	22.0871	24.0413	24.4059	22.09	25.2363		-0.717476	-0.707327	-0.688784	-0.600148	-0.990132	-1.11953	-0.145851	-0.581018	1.71051	1.95256	0.161993	2.79474	0.0891283				-0.819026	-0.819825	-0.8119	-0.701001
P49790	Nuclear pore complex protein Nup153	NUP153	2.78653e+06	3.22844e+06	2.1954e+06	8.17702e+06	2.30705e+06	26009711	8.2187e+07	4.01673e+06	3.55197e+06	3.01643e+06	9.96465e+07	3.41937e+07	12		21.41	21.6224	21.0661	22.9631	21.1376	24.6325	26.2924	21.9376	21.7602	21.5244	26.5703	25.0272		-1.3683	-1.40913	-2.13447	-0.136804	-1.83268	1.50073	4.00916	-0.7305	-0.570613	-0.928956	4.64235	2.58564	0.302202				-1.56196	-1.63325	-2.516	-0.159794
Q15582	Transforming growth factor-beta-induced protein ig-h3	TGFBI	1.86823e+07	2.07501e+07	1.77364e+07	24235922	2.25963e+07	2.90375e+07	6.71552e+06	2.16135e+07	1.42028e+07	1.60815e+07	6.83057e+06	1.94377e+07	12		24.1552	24.3066	24.0802	24.5306	24.4296	24.7914	22.6791	24.3654	23.7597	23.9389	22.7036	24.2124		1.37684	1.27508	0.879683	1.4307	1.45929	1.65959	0.395822	1.69734	1.42887	1.48553	0.775605	1.77077	1.30293				1.57171	1.47787	1.03692	1.67112
P32969	60S ribosomal protein L9	RPL9	1.44285e+08	1.35464e+08	1.30259e+08	1.09622e+08	9.60151e+07	6.86602e+07	1.11001e+08	1.05536e+08	8.37315e+07	8.56521e+07	7.2879e+07	6.90564e+07	12		27.1043	27.0133	26.9568	26.708	26.5168	26.033	26.726	26.6532	26.3193	26.352	26.119	26.0413		4.32602	3.9818	3.75628	3.60802	3.54646	2.90115	4.44275	3.98507	3.98846	3.89862	4.19103	3.59969	3.85211				4.93831	4.61509	4.42769	4.21433
P22059	Oxysterol-binding protein 1	OSBP	1.11976e+07	1.23496e+07	1.41929e+07	1.14266e+07	1.28215e+07	1.09165e+07	9.57739e+06	1.23293e+07	6.7339e+06	8.76054e+06	9.00978e+06	8.62734e+06	12		23.4167	23.558	23.7587	23.4459	23.6121	23.38	23.1912	23.5556	22.683	23.0626	23.1031	23.0405		0.638351	0.526425	0.558144	0.345942	0.641762	0.24818	0.907956	0.887501	0.352209	0.609223	1.17509	0.5989	0.62414				0.728701	0.610151	0.65791	0.404077
Q15424	Scaffold attachment factor B1	SAFB	1.4214e+07	2.00317e+07	2.11089e+07	2.01788e+07	2.01994e+07	1.48733e+07	1.61086e+07	1.16251e+07	3.08491e+07	3.5647e+07	6.85479e+06	3.70628e+07	12		23.7608	24.2558	24.3313	24.2663	24.2678	23.8262	23.9413	23.4707	24.8787	25.0873	22.7087	25.1435		0.982481	1.22424	1.13082	1.16639	1.29751	0.694395	1.65808	0.802653	2.54792	2.63391	0.780711	2.70188	1.46842				1.12154	1.41895	1.33295	1.36239
P45974	Ubiquitin carboxyl-terminal hydrolase 5	USP5	2.17709e+07	2.84456e+07	4.37846e+07	3.55853e+07	3.23295e+07	3.22075e+07	2.43715e+07	1.90427e+07	2.09311e+07	2.31655e+07	2.19729e+07	1.55984e+07	12		24.3759	24.7617	25.3839	25.0848	24.9463	24.9409	24.5387	24.1827	24.3191	24.4655	24.3892	23.8949		1.59756	1.73016	2.1834	1.98483	1.97605	1.80907	2.25544	1.51465	1.98834	2.01211	2.46125	1.45331	1.91385				1.82368	2.00534	2.57367	2.31837
Q9Y696	Chloride intracellular channel protein 4	CLIC4	4.60699e+07	6.95668e+07	6.44542e+07	57972214	7.60868e+07	5.23701e+07	3.54586e+07	5.76903e+07	2.77568e+07	2.44945e+07	9.40256e+06	2.69194e+07	12		25.4573	26.0519	25.9418	25.7889	26.1811	25.6422	25.0796	25.7818	24.7263	24.546	23.1646	24.6821		2.67899	3.02036	2.74125	2.68891	3.21085	2.51042	2.79639	3.11374	2.39554	2.09259	1.23665	2.24056	2.56052				3.05816	3.50074	3.23123	3.14077
P50851	Lipopolysaccharide-responsive and beige-like anchor protein	LRBA	3.13342e+07	5.09819e+07	4.63412e+07	5.49343e+07	6.4486e+07	4.3709e+07	5.81769e+06	1.25207e+07	1.8375e+06	4.30952e+06	6.95186e+06	4.47215e+06	12		24.9012	25.6035	25.4658	25.7112	25.9425	25.3814	22.472	23.5778	20.8093	22.0391	22.729	22.0925		2.1229	2.57194	2.26527	2.61126	2.97219	2.24961	0.188771	0.909723	-1.52149	-0.414272	0.800999	-0.349047	1.20065				2.42337	2.981	2.67017	3.05007
P63010	AP-2 complex subunit beta	AP2B1	2.21162e+07	2.4186e+07	4.31159e+07	2.3084e+07	1.60974e+07	5.04622e+07	4.93228e+07	20491301	1.21528e+07	1.28182e+07	3.74313e+07	9.87247e+06	12		24.3986	24.5277	25.3617	24.4604	23.9403	25.5887	25.5558	24.2885	23.5348	23.6117	25.1577	23.235		1.62027	1.49613	2.16119	1.36044	0.970033	2.45688	3.27251	1.62042	1.20398	1.15833	3.22977	0.793396	1.77861				1.8496	1.73408	2.5475	1.58906
P48147	Prolyl endopeptidase	PREP	2.98402e+07	3.04605e+07	3.04511e+07	3.31456e+07	2.97696e+07	2.85936e+07	1.79408e+07	1.19485e+07	7.46743e+06	7.97972e+06	1.6468e+07	5.03728e+06	12		24.8308	24.8604	24.86	24.9823	24.8273	24.7692	24.0967	23.5103	22.8322	22.9279	23.9732	22.2642		2.05242	1.8289	1.65947	1.88237	1.85704	1.63737	1.81349	0.842232	0.501377	0.474541	2.04519	-0.177371	1.36809				2.34292	2.11978	1.95609	2.19869
O15523	ATP-dependent RNA helicase DDX3Y	DDX3Y	8.8412e+06	9.22327e+06	1.35931e+07	9.17383e+06	1.33865e+07	1.03071e+07	5.86885e+06	8.60526e+06	9.44683e+06	1.14843e+07	6.06409e+06	1.26516e+07	12		23.0758	23.1368	23.6964	23.1291	23.6743	23.2971	22.4846	23.0368	23.1714	23.4532	22.5319	23.5928		0.297478	0.105307	0.495843	0.0291459	0.703977	0.165319	0.201402	0.368698	0.840597	0.999796	0.60389	1.15123	0.49689				0.339582	0.122056	0.584473	0.0340438
P22090	40S ribosomal protein S4, Y isoform 1	RPS4Y1	4.05711e+07	4.45752e+07	4.23175e+07	4.15169e+07	2.99688e+07	3.87142e+07	3.10639e+07	2.39333e+07	2.3416e+07	2.78655e+07	2.94374e+07	2.84942e+07	12		25.274	25.4097	25.3347	25.3072	24.837	25.2064	24.8887	24.5125	24.481	24.732	24.8111	24.7642		2.49562	2.3782	2.13423	2.20725	1.86667	2.07454	2.60549	1.84442	2.15019	2.27861	2.88318	2.32258	2.27008				2.84884	2.75644	2.51571	2.57817
Q9NUU7	ATP-dependent RNA helicase DDX19A	DDX19A	3.55716e+07	2.11017e+07	1.89043e+07	1.12527e+07	1.23978e+07	1.56351e+07	2.77867e+07	2.53526e+07	2.10207e+07	2.59908e+07	2.04104e+07	2.05888e+07	12		25.0842	24.3309	24.1722	23.4238	23.5636	23.8983	24.7279	24.5956	24.3253	24.6315	24.2828	24.2954		2.30589	1.29932	0.971686	0.323817	0.593285	0.76646	2.44465	1.92754	1.9945	2.17813	2.35483	1.85377	1.58449				2.63226	1.50597	1.14537	0.378234
P54578	Ubiquitin carboxyl-terminal hydrolase 14	USP14	2.18726e+07	2.79153e+07	2.99467e+07	2.59852e+07	3.09152e+07	2.62866e+07	4.29671e+07	2.36195e+07	16933118	1.89483e+07	2.71388e+07	12222354	12		24.3826	24.7346	24.8359	24.6312	24.8818	24.6478	25.3567	24.4935	24.0133	24.1756	24.6939	23.543		1.60429	1.70301	1.63537	1.53124	1.91152	1.516	3.07349	1.82538	1.68254	1.7222	2.76588	1.10143	1.83936				1.83136	1.97387	1.92769	1.78856
O94906	Pre-mRNA-processing factor 6	PRPF6	1.16082e+07	9.66259e+06	27733379	9144716	1.11058e+07	1.17318e+07	4.04761e+06	1.15182e+07	8.01874e+06	1.08561e+07	3.67785e+06	1.21855e+07	12		23.4686	23.204	24.7251	23.1245	23.4048	23.4839	21.9486	23.4574	22.9349	23.372	21.8104	23.5387		0.690312	0.172439	1.5246	0.0245594	0.43451	0.352101	-0.334607	0.789322	0.604141	0.918631	-0.117538	1.09708	0.512962				0.788017	0.199865	1.79711	0.0286865
O95479	GDH/6PGL endoplasmic bifunctional protein	H6PD	1.81217e+07	3.81929e+07	3.56322e+07	1.84965e+07	2.61606e+07	1.8714e+07	9.82574e+06	1.83359e+07	2.73507e+07	3.02616e+07	1.04071e+07	2.98797e+07	12		24.1112	25.1868	25.0867	24.1407	24.6409	24.1576	23.2281	24.1282	24.7051	24.851	23.3111	24.8327		1.33288	2.15526	1.88615	1.0408	1.6706	1.02579	0.94489	1.46008	2.37427	2.39762	1.3831	2.39108	1.67188				1.52154	2.49805	2.22329	1.2157
Q15181	Inorganic pyrophosphatase	PPA1	4.40652e+07	4.7918e+07	4.66639e+07	5.43985e+07	5.41581e+07	5.98237e+07	2.92167e+07	3.84385e+07	1.80043e+07	1.77521e+07	9.46174e+06	1.86965e+07	12		25.3931	25.5141	25.4758	25.6971	25.6907	25.8342	24.8003	25.1961	24.1018	24.0815	23.1737	24.1563		2.6148	2.48252	2.27528	2.59711	2.72038	2.70239	2.51704	2.52796	1.77104	1.62812	1.24571	1.71468	2.23309				2.9849	2.87736	2.68198	3.03355
P53999	Activated RNA polymerase II transcriptional coactivator p15	SUB1	8.81714e+07	108651182	1.15134e+08	8.91305e+07	1.20068e+08	1.30123e+08	4.34297e+07	6.93814e+07	3.9797e+07	5.99715e+07	1.82611e+07	5.37754e+07	12		26.3938	26.6951	26.7787	26.4094	26.8393	26.9553	25.3722	26.048	25.2462	25.8378	24.1223	25.6804		3.61548	3.66359	3.57821	3.30947	3.86898	3.82348	3.08894	3.37996	2.91535	3.38441	2.1943	3.23886	3.33842				4.1272	4.24627	4.2178	3.86561
Q02880	DNA topoisomerase 2-beta	TOP2B	1.35443e+07	1.18716e+07	8.41549e+06	9.1764e+06	1.14502e+07	1.22594e+07	1.7027e+07	1.18926e+07	5.75241e+06	7.5261e+06	2.16786e+07	8.24547e+06	12		23.6912	23.501	23.0046	23.1295	23.4489	23.5474	24.0213	23.5036	22.4557	22.8435	24.3698	22.9752		0.912851	0.469474	-0.195907	0.0295486	0.478579	0.415561	1.73808	0.835474	0.124932	0.390106	2.4418	0.533586	0.681173				1.04205	0.544143	-0.230925	0.0345141
P05141	ADP/ATP translocase 2	SLC25A5	2.27494e+08	3.14779e+08	2.95145e+08	2.92077e+08	3.04916e+08	3.48692e+08	2.26863e+08	2.01834e+08	1.77441e+08	2.15494e+08	2.66072e+08	2.5787e+08	12		27.7613	28.2298	28.1368	28.1218	28.1838	28.3774	27.7572	27.5886	27.4028	27.6831	27.9872	27.9421		4.98292	5.19823	4.93632	5.02183	5.21354	5.24556	5.474	4.92051	5.07196	5.22971	6.05927	5.50049	5.23786				5.68819	6.02499	5.81867	5.86573
Q01469	Fatty acid-binding protein 5	FABP5	5.0207e+07	5.77802e+07	3.94893e+07	3.76981e+07	6.15305e+07	6.22206e+07	2.72146e+06	4.79086e+07	3.29289e+07	3.17291e+07	272394	3.35448e+07	12		25.5814	25.7841	25.235	25.168	25.8748	25.8909	21.376	25.5138	24.9729	24.9193	18.0553	24.9996		2.80305	2.75253	2.03444	2.06804	2.90451	2.75907	-0.907295	2.84569	2.64205	2.46594	-3.87264	2.558	1.75445				3.19979	3.19032	2.39808	2.41557
Q86V48	Leucine zipper protein 1	LUZP1	1.88596e+07	9.78527e+06	7.20759e+06	1.6072e+07	2.21311e+07	2.01579e+07	5.74833e+06	1.75783e+07	1.92786e+07	2.23733e+07	3.69704e+06	2.13185e+07	12		24.1688	23.2222	22.7811	23.938	24.3996	24.2648	22.4547	24.0673	24.2005	24.4153	21.8179	24.3456		1.39047	0.19064	-0.419438	0.838096	1.42928	1.13302	0.171467	1.3992	1.8697	1.96191	-0.110029	1.90402	0.979861				1.58727	0.220961	-0.49441	0.978935
O14776	Transcription elongation regulator 1	TCERG1	2.2497e+07	4.47364e+07	8.70039e+07	9.34984e+07	3.3687e+07	1.14794e+08	1.49891e+07	4.45348e+07	2.1032e+07	2.76196e+07	1.75719e+07	2.41425e+07	12		24.4232	25.4149	26.3746	26.4784	25.0057	26.7745	23.8374	25.4084	24.3261	24.7192	24.0668	24.5251		1.6449	2.38341	3.17405	3.37849	2.0354	3.64265	1.55417	2.74034	1.99528	2.26582	2.1388	2.08349	2.41973				1.87771	2.76248	3.7414	3.94623
Q14254	Flotillin-2	FLOT2	2.64226e+07	2.95851e+07	3.6637e+07	3.1404e+07	3.91518e+07	2.3748e+07	1.22111e+07	2.64656e+07	1.65315e+07	1.84385e+07	9.99745e+06	1.45666e+07	12		24.6553	24.8184	25.1268	24.9044	25.2226	24.5013	23.5417	24.6576	23.9787	24.1362	23.2531	23.7962		1.87694	1.78683	1.92627	1.8045	2.25228	1.36948	1.25845	1.98952	1.64791	1.68285	1.32516	1.35457	1.68956				2.14259	2.07102	2.27058	2.10774
Q9UNM6	26S proteasome non-ATPase regulatory subunit 13	PSMD13	4.93518e+07	6.27515e+07	5.74041e+07	5.6491e+07	2.99889e+07	5.43835e+07	1.56792e+07	2.3394e+07	1.87683e+07	1.8832e+07	1.28446e+07	2.24802e+07	12		25.5566	25.9031	25.7747	25.7515	24.8379	25.6967	23.9023	24.4796	24.1618	24.1667	23.6147	24.4221		2.77827	2.87161	2.57413	2.65157	1.86763	2.56484	1.6191	1.81155	1.831	1.71332	1.68668	1.98057	2.16252				3.17149	3.32833	3.03424	3.09716
Q9Y617	Phosphoserine aminotransferase	PSAT1	8.81823e+07	1.06351e+08	110126948	1.13207e+08	100193738	1.04625e+08	4.82863e+07	6.36525e+07	3.46635e+07	4.10544e+07	1.19113e+07	2.43165e+07	12		26.394	26.6643	26.7146	26.7544	26.5782	26.6406	25.5251	25.9237	25.0469	25.291	23.5058	24.5354		3.61565	3.63272	3.51407	3.65444	3.60792	3.50883	3.24187	3.25562	2.71611	2.83767	1.57786	2.09385	3.10472				4.1274	4.21049	4.14219	4.26856
P50895	Basal cell adhesion molecule	BCAM	1.23339e+07	1.40302e+07	1.51574e+07	1.42215e+07	1.63531e+07	1.88009e+07	4.48662e+06	7.4682e+06	4.35735e+06	4.40716e+06	1.411e+06	4.43551e+06	12		23.5561	23.742	23.8535	23.7616	23.9631	24.1643	22.0972	22.8323	22.055	22.0714	20.4283	22.0807		0.777799	0.71049	0.652994	0.661622	0.992765	1.03248	-0.186048	0.16424	-0.275783	-0.381949	-1.49968	-0.360917	0.190667				0.887886	0.823492	0.769714	0.772804
O00299	Chloride intracellular channel protein 1	CLIC1	2.0492e+08	2.70497e+08	3.52447e+08	2.78646e+08	3.08945e+08	2.88776e+08	1.51088e+08	173233238	1.05588e+08	1.08994e+08	9.50804e+07	1.04494e+08	12		27.6105	28.011	28.3928	28.0539	28.2028	28.1054	27.1708	27.3681	26.6539	26.6997	26.5026	26.6388		4.83215	4.9795	5.19231	4.95391	5.23248	4.97355	4.88757	4.70005	4.32307	4.24631	4.57467	4.19725	4.75774				5.51608	5.77147	6.12041	5.7864
Q01581	Hydroxymethylglutaryl-CoA synthase, cytoplasmic	HMGCS1	5.54897e+07	6.62964e+07	5.83079e+07	4.34696e+07	3.95043e+07	5.31942e+07	3.60405e+07	6.58807e+07	1.4146e+07	1.73024e+07	1.15337e+07	1.86975e+07	12		25.7257	25.9824	25.7972	25.3735	25.2355	25.6648	25.1031	25.9734	23.7539	24.0445	23.4593	24.1563		2.94738	2.95089	2.59666	2.27356	2.26521	2.53294	2.81987	3.30526	1.42309	1.5911	1.53138	1.71476	2.32934				3.36455	3.42022	3.0608	2.65562
Q13724	Mannosyl-oligosaccharide glucosidase	MOGS	5.3329e+07	3.16013e+07	4.99115e+07	3.14086e+07	4.23277e+07	44952762	1.41136e+07	4.53582e+07	3.61774e+07	4.66764e+07	1.82264e+07	4.72875e+07	12		25.6684	24.9135	25.5729	24.9047	25.3351	25.4219	23.7506	25.4349	25.1086	25.4762	24.1195	25.495		2.89008	1.88194	2.37235	1.80471	2.3648	2.29009	1.46734	2.76677	2.77778	3.02283	2.19155	3.05337	2.40697				3.29914	2.18126	2.79639	2.10798
P05165	Propionyl-CoA carboxylase alpha chain, mitochondrial	PCCA	1.01371e+08	1.34193e+08	1.05193e+08	1.2222e+08	2.88962e+07	1.18441e+08	1.00995e+07	8.6416e+07	6.90231e+07	7.53834e+07	8.48335e+06	6.46494e+07	12		26.5951	26.9997	26.6485	26.8649	24.7844	26.8196	23.2678	26.3648	26.0406	26.1677	23.0162	25.9461		3.81673	3.9682	3.44794	3.76496	1.81408	3.68777	0.98454	3.69671	3.70977	3.71438	1.08823	3.50455	3.09982				4.35694	4.59933	4.06425	4.39765
P38117	Electron transfer flavoprotein subunit beta	ETFB	9.62561e+07	1.31273e+08	1.52938e+08	1.40911e+08	1.60759e+08	1.40722e+08	9.7014e+07	1.01217e+08	1.00243e+08	1.09951e+08	7.74869e+07	9.61466e+07	12		26.5204	26.968	27.1884	27.0702	27.2603	27.0683	26.5317	26.5929	26.5789	26.7123	26.2074	26.5187		3.74204	3.93645	3.98785	3.97026	4.29003	3.93645	4.24845	3.92478	4.24812	4.25892	4.27948	4.07715	4.075				4.27168	4.56253	4.70066	4.63745
P15144	Aminopeptidase N	ANPEP	1.22981e+07	1.17049e+07	7.43648e+06	9.26621e+06	1.38358e+07	2.31722e+07	1.77308e+07	1.02942e+07	1.27162e+07	1.92865e+07	1.61324e+07	2.7837e+07	12		23.5519	23.4806	22.8262	23.1435	23.7219	24.4659	24.0798	23.2953	23.6002	24.2011	23.9435	24.7305		0.773604	0.449064	-0.374336	0.0435998	0.75161	1.33407	1.79651	0.627234	1.26936	1.74772	2.01549	2.28892	1.06024				0.883097	0.520486	-0.441246	0.0509265
P05198	Eukaryotic translation initiation factor 2 subunit 1	EIF2S1	41831964	41394494	1.3124e+08	44072758	3.51379e+07	42365390	2.45965e+07	3.61678e+07	23724176	24465880	1.59503e+07	1.75927e+07	12		25.3181	25.3029	26.9676	25.3934	25.0665	25.3364	24.5519	25.1082	24.4999	24.5443	23.9271	24.0685		2.53977	2.2714	3.76711	2.29344	2.09623	2.20456	2.2687	2.44011	2.16905	2.0909	1.99911	1.62689	2.31394				2.89924	2.63266	4.44046	2.67884
Q9UHG3	Prenylcysteine oxidase 1	PCYOX1	2.72309e+07	2.94356e+07	2.89317e+07	3.47452e+07	3.58369e+07	3.787e+07	19935539	3.12397e+07	1.86195e+07	2.07898e+07	1.76152e+07	2.46064e+07	12		24.6987	24.8111	24.7861	25.0503	25.0949	25.1746	24.2488	24.8969	24.1503	24.3094	24.0703	24.5525		1.92041	1.77952	1.58562	1.95036	2.12465	2.04273	1.96559	2.22879	1.81951	1.85601	2.14235	2.11095	1.96054				2.19222	2.06255	1.86905	2.27812
P53992	Protein transport protein Sec24C	SEC24C	1.43936e+07	3.2473e+07	4.31794e+07	4.2714e+07	2.21122e+07	2.94221e+07	3.73648e+06	1.44714e+07	1.51877e+07	1.74282e+07	1.85291e+06	9.7279e+06	12		23.7789	24.9527	25.3638	25.3482	24.3983	24.8104	21.8332	23.7867	23.8564	24.0549	20.8214	23.2137		1.0006	1.9212	2.16332	2.24826	1.42805	1.67857	-0.449995	1.11861	1.5256	1.60156	-1.10661	0.772113	1.15844				1.14222	2.22676	2.55	2.62607
Q2TB90	Hexokinase HKDC1	HKDC1	4.17831e+07	4.22497e+07	2.29273e+07	2.16381e+07	1.33139e+07	1.97538e+07	716489	2.67795e+07	2.78294e+07	3.53349e+07	2.16663e+06	5.12392e+07	12		25.3164	25.3324	24.4506	24.3671	23.6664	24.2356	19.4506	24.6746	24.7301	25.0746	21.047	25.6107		2.53808	2.3009	1.25004	1.26712	0.69614	1.10381	-2.83266	2.00654	2.39931	2.62122	-0.88095	3.16916	1.30323				2.89732	2.66685	1.47348	1.48006
Q9Y4C1	Lysine-specific demethylase 3A	KDM3A	5.90688e+06	5.30688e+06	8.3505e+06	1.06751e+07	7.20421e+06	7.65089e+06	4.83528e+06	3.92382e+06	5.81462e+06	5.1563e+06	6.77472e+06	4.42281e+06	12		22.494	22.3394	22.9934	23.3478	22.7804	22.8672	22.2052	21.9038	22.4713	22.2979	22.6917	22.0765		-0.284367	-0.692107	-0.207092	0.247803	-0.189885	-0.264624	-0.0780773	-0.764262	0.140452	-0.155461	0.763761	-0.365053	-0.154076				-0.324616	-0.802185	-0.244109	0.289445
Q04446	1,4-alpha-glucan-branching enzyme	GBE1	1.73161e+07	1.99273e+07	3.42492e+07	3.06383e+07	38993177	4.49521e+07	1.12942e+07	15478240	1.22946e+07	1.46339e+07	6.54634e+06	8.52877e+06	12		24.0456	24.2482	25.0296	24.8688	25.2167	25.4219	23.4291	23.8837	23.5515	23.8028	22.6423	23.0239		1.26728	1.2167	1.82904	1.76889	2.24642	2.29006	1.14584	1.21565	1.22072	1.34944	0.714288	0.582322	1.40389				1.44665	1.41022	2.15597	2.06614
Q06520	Bile salt sulfotransferase	SULT2A1	4.52979e+07	4.9125e+07	5.1155e+07	4.87626e+07	5.10122e+07	9.15263e+07	3.57838e+07	4.106e+07	2.69694e+07	3.46315e+07	2.24084e+07	2.84337e+07	12		25.4329	25.55	25.6084	25.5393	25.6043	26.4477	25.0928	25.2912	24.6848	25.0456	24.4175	24.7611		2.65461	2.51841	2.40785	2.43933	2.63404	3.31586	2.80956	2.62314	2.35402	2.59222	2.48957	2.31951	2.59651				3.03033	2.91896	2.83824	2.84924
P22234	Multifunctional protein ADE2	PAICS	7.03238e+07	1.01293e+08	1.03489e+08	9.69565e+07	4.70479e+07	9.09367e+07	4.23748e+07	5.84465e+07	2.97757e+07	3.74023e+07	2.67596e+07	2.88647e+07	12		26.0675	26.594	26.6249	26.5308	25.4876	26.4384	25.3367	25.8006	24.8276	25.1566	24.6736	24.7828		3.28918	3.56242	3.42438	3.43089	2.51733	3.30654	3.05346	3.13252	2.49683	2.70326	2.74559	2.34122	3.0003				3.75472	4.12901	4.03648	4.00743
Q96KR1	Zinc finger RNA-binding protein	ZFR	6.73253e+07	1.06984e+08	1.52231e+08	1.17125e+08	1.24816e+08	1.21055e+08	3.86675e+07	5.40704e+07	3.10329e+07	2.64602e+07	1.11234e+06	1.7647e+07	12		26.0046	26.6728	27.1817	26.8035	26.8952	26.8511	25.2046	25.6883	24.8873	24.6573	20.0852	24.0729		3.22631	3.64128	3.98116	3.70352	3.92494	3.71927	2.92137	3.02025	2.5565	2.20395	-1.8428	1.63133	2.72392				3.68296	4.22042	4.69278	4.32589
O60610	Protein diaphanous homolog 1	DIAPH1	3.9256e+06	7.08957e+06	6.67587e+06	6.658e+06	6.68316e+06	8.1457e+06	3.51635e+06	1.54333e+07	9.4179e+06	9.3966e+06	2.83071e+06	8.66859e+06	12		21.9045	22.7573	22.6705	22.6667	22.6721	22.9576	21.7456	23.8795	23.167	23.1637	21.4327	23.0474		-0.873849	-0.274273	-0.529998	-0.433289	-0.298196	-0.174214	-0.537597	1.21145	0.836171	0.710342	-0.495236	0.605781	-0.0210756				-0.997531	-0.317896	-0.624733	-0.506102
Q9UMS4	Pre-mRNA-processing factor 19	PRPF19	2.55872e+07	2.8368e+07	3.75675e+07	2.59562e+07	1.99632e+07	2.71561e+07	2.488e+07	1.82373e+07	2.27147e+07	1.79463e+07	1.37342e+07	2.4547e+07	12		24.6089	24.7578	25.163	24.6296	24.2508	24.6948	24.5685	24.1204	24.4371	24.0972	23.7113	24.549		1.83059	1.72622	1.96246	1.52963	1.28055	1.56295	2.28524	1.4523	2.10632	1.64382	1.7833	2.10746	1.77257				2.08968	2.00077	2.31324	1.78667
Q9UKM9	RNA-binding protein Raly	RALY	8.5172e+07	1.07436e+08	1.27563e+08	1.12458e+08	1.11189e+08	9.48047e+07	5.64926e+07	8.01195e+07	6.74713e+07	9.74617e+07	4.67427e+07	7.57895e+07	12		26.3439	26.6789	26.9266	26.7448	26.7284	26.4985	25.7516	26.2556	26.0078	26.5383	25.4782	26.1755		3.56554	3.64736	3.72612	3.64486	3.75815	3.36663	3.46832	3.58756	3.67697	4.08497	3.55027	3.73391	3.65089				4.0702	4.22746	4.39214	4.25736
Q6YN16	Hydroxysteroid dehydrogenase-like protein 2	HSDL2	2.29534e+07	5.04681e+07	6.31051e+07	4.57923e+07	1.49107e+07	5.71602e+07	3.82528e+07	2.89666e+07	3.0389e+07	3.06254e+07	2.59392e+07	30928690	12		24.4522	25.5889	25.9113	25.4486	23.8298	25.7685	25.1891	24.7879	24.857	24.8682	24.6286	24.8824		1.67387	2.55733	2.71073	2.34866	0.859547	2.63669	2.90582	2.1198	2.52624	2.41486	2.70066	2.44086	2.32459				1.91079	2.96407	3.19526	2.74334
P08865	40S ribosomal protein SA	RPSA	2.57761e+08	3.1673e+08	3.17979e+08	2.83e+08	2.23522e+08	2.67614e+08	1.68874e+08	1.98089e+08	1.61657e+08	1.82042e+08	1.09804e+08	1.61006e+08	12		27.9415	28.2387	28.2444	28.0762	27.7358	27.9956	27.3314	27.5616	27.2684	27.4397	26.7104	27.2625		5.16313	5.20714	5.04383	4.97628	4.76555	4.86376	5.04813	4.89349	4.93756	4.98633	4.78239	4.82095	4.95738				5.8939	6.03532	5.94539	5.81252
Q9Y262	Eukaryotic translation initiation factor 3 subunit L	EIF3L	1.93871e+07	1.94514e+07	2.59653e+07	2.15409e+07	1.69575e+07	2.00621e+07	1.43752e+07	1.73278e+07	2.07558e+07	2.56314e+07	5.19149e+06	1.9103e+07	12		24.2086	24.2134	24.6301	24.3606	24.0154	24.258	23.7771	24.0466	24.307	24.6114	22.3077	24.1873		1.43026	1.18183	1.42956	1.26063	1.04513	1.12615	1.49383	1.3785	1.97621	2.15804	0.379747	1.74571	1.3838				1.6327	1.36979	1.68509	1.47247
Q8WYA6	Beta-catenin-like protein 1	CTNNBL1	1.24403e+07	3.36342e+07	4.75268e+07	3.80649e+07	3.48549e+07	4.54536e+07	7.8915e+06	1.85655e+07	1.58664e+07	1.68491e+07	6.25936e+06	2.01906e+07	12		23.5685	25.0034	25.5022	25.182	25.0549	25.4379	22.9119	24.1461	23.9195	24.0062	22.5776	24.2672		0.790184	1.97188	2.30171	2.08201	2.08456	2.30607	0.628624	1.47803	1.58867	1.5528	0.649615	1.8256	1.60498				0.902025	2.28551	2.71313	2.43188
Q03701	CCAAT/enhancer-binding protein zeta	CEBPZ	2.3357e+07	1.10579e+07	1.79837e+07	1.09768e+07	6.40993e+06	9.26206e+06	12577065	1.79342e+07	1.3502e+07	1.28811e+07	11714169	11369181	12		24.4773	23.3986	24.1002	23.3879	22.6119	23.1429	23.5843	24.0962	23.6867	23.6188	23.4818	23.4386		1.69902	0.367032	0.899659	0.288002	-0.358416	0.0110807	1.30105	1.42812	1.35587	1.16539	1.55378	0.997041	0.892302				1.93949	0.425408	1.06047	0.336399
Q8N1F7	Nuclear pore complex protein Nup93	NUP93	1.42692e+07	36683944	4.19559e+07	4.26543e+07	3.04056e+07	4.63877e+07	5.42144e+07	8.43729e+06	9.80375e+06	8.41418e+06	74383514	7.74862e+06	12		23.7664	25.1286	25.3224	25.3462	24.8578	25.4672	25.6922	23.0083	23.2249	23.0044	26.1485	22.8855		0.988069	2.09711	2.12185	2.24624	1.88754	2.33542	3.40893	0.340259	0.894099	0.551024	4.22051	0.443923	1.79458				1.12792	2.43064	2.50111	2.62371
Q9NQ94	APOBEC1 complementation factor	A1CF	1.74413e+07	1.75527e+07	6.39612e+07	6.72984e+07	18879622	1.12426e+08	10626335	1.14834e+07	9.53879e+06	1.15531e+07	1.06611e+07	1.39127e+07	12		24.056	24.0652	25.9307	26.0041	24.1703	26.7444	23.3411	23.4531	23.1854	23.4618	23.3458	23.7299		1.27767	1.03365	2.73017	2.90412	1.20003	3.61258	1.0579	0.784963	0.854572	1.00841	1.41788	1.28831	1.59752				1.45851	1.19805	3.21817	3.39215
O95202	Mitochondrial proton/calcium exchanger protein	LETM1	4.12073e+06	3.71226e+07	1.55558e+07	4.18801e+06	2.2453e+07	3.7823e+07	8.15406e+06	1.54105e+07	5.43973e+06	1.36483e+07	7.44603e+06	9.90247e+06	12		21.9745	25.1458	23.8909	21.9978	24.4204	25.1728	22.9591	23.8774	22.3751	23.7022	22.828	23.2394		-0.803862	2.11426	0.690422	-1.10211	1.45011	2.04094	0.675843	1.20932	0.0443023	1.24885	0.900071	0.797773	0.772159				-0.917639	2.45052	0.813831	-1.28732
Q86TX2	Acyl-coenzyme A thioesterase 1	ACOT1	7.64918e+07	9.0843e+07	1.02114e+08	1.0007e+08	95623065	1.00629e+08	3.93637e+07	3.69559e+07	2.36288e+07	2.11238e+07	2.66034e+07	19607987	12		26.1888	26.4369	26.6056	26.5764	26.5109	26.5845	25.2304	25.1393	24.494	24.3324	24.6651	24.2249		3.41047	3.40533	3.40508	3.47649	3.54056	3.45265	2.94712	2.47121	2.16324	1.879	2.73714	1.78335	2.8893				3.89318	3.94694	4.01372	4.0607
Q13501	Sequestosome-1	SQSTM1	1.33558e+07	1.96611e+07	2.48747e+07	1.56298e+07	1.05222e+07	1.33491e+07	9.24474e+06	1.44539e+07	2.00399e+07	2.09161e+07	1.27403e+07	1.44201e+07	12		23.671	24.2288	24.5682	23.8978	23.3269	23.6702	23.1402	23.785	24.2564	24.3181	23.6029	23.7816		0.892627	1.1973	1.36765	0.79785	0.356634	0.538417	0.856957	1.11686	1.92557	1.86474	1.67492	1.33999	1.16079				1.01897	1.38773	1.61211	0.931926
Q13217	DnaJ homolog subfamily C member 3	DNAJC3	2.44742e+07	1.10573e+07	1.98372e+07	2.17654e+07	2.69177e+07	2.23273e+07	6.16763e+06	2.22158e+07	19198404	24633471	3.97897e+06	2.12098e+07	12		24.5448	23.3985	24.2417	24.3755	24.6821	24.4123	22.5563	24.4051	24.1945	24.5541	21.924	24.3382		1.76643	0.366953	1.04118	1.27559	1.71176	1.28049	0.27304	1.73699	1.86368	2.10075	-0.00400756	1.89664	1.27579				2.01644	0.425316	1.22729	1.48994
P51570	Galactokinase	GALK1	2.32012e+07	2.25414e+07	2.68436e+07	2.2394e+07	1.99956e+07	2.48853e+07	1.17949e+07	1.99814e+07	1.35131e+07	1.55812e+07	1.74742e+07	1.74316e+07	12		24.4677	24.4261	24.6781	24.4166	24.2532	24.5688	23.4917	24.2522	23.6879	23.8933	24.0587	24.0552		1.68937	1.39454	1.47755	1.31666	1.28289	1.43697	1.20841	1.58406	1.35705	1.43994	2.13076	1.61362	1.49432				1.92847	1.61633	1.74166	1.53792
P15170	Eukaryotic peptide chain release factor GTP-binding subunit ERF3A	GSPT1	4.13076e+07	5.79988e+07	6.11429e+07	4.56882e+07	4.35599e+07	3.50105e+07	3.52479e+07	3.35709e+07	2.79316e+07	2.98656e+07	2.3263e+07	2.02312e+07	12		25.2999	25.7895	25.8657	25.4453	25.3765	25.0613	25.071	25.0007	24.7354	24.832	24.4715	24.2701		2.52157	2.75798	2.66516	2.34537	2.4062	1.92946	2.78779	2.33262	2.40459	2.37861	2.54356	1.8285	2.40845				2.87847	3.19663	3.14154	2.7395
O95793	Double-stranded RNA-binding protein Staufen homolog 1	STAU1	8.31948e+07	9.02012e+07	7.64084e+07	6.65769e+07	4.1916e+07	6.69552e+07	3.07004e+07	7.06942e+07	4.11384e+07	4.10641e+07	2.44638e+07	2.59714e+07	12		26.31	26.4266	26.1872	25.9885	25.321	25.9967	24.8718	26.0751	25.294	25.2914	24.5441	24.6304		3.53166	3.3951	2.9867	2.88857	2.3507	2.86487	2.58851	3.407	2.96318	2.83801	2.61618	2.18884	2.88494				4.03152	3.93509	3.52056	3.37398
Q9Y2W1	Thyroid hormone receptor-associated protein 3	THRAP3	1.50205e+08	3.47983e+07	3.45339e+07	3.71104e+07	2.96728e+07	29110747	9.59442e+06	1.00137e+08	7.75925e+07	8.69201e+07	1.07313e+07	9.28303e+07	12		27.1624	25.0525	25.0415	25.1453	24.8226	24.795	23.1938	26.5774	26.2094	26.3732	23.3553	26.4681		4.38403	2.02097	1.84099	2.04537	1.85234	1.66323	0.91052	3.90931	3.87861	3.91982	1.42735	4.02651	2.65659				5.00453	2.3424	2.17006	2.38909
P42167	Lamina-associated polypeptide 2, isoforms beta/gamma	TMPO	2.71409e+07	33145790	50073959	39272159	3.2265e+07	2.89991e+07	1.1296e+07	2.20688e+07	2.16973e+07	23120991	1.34091e+07	2.47172e+07	12		24.694	24.9823	25.5776	25.227	24.9435	24.7895	23.4293	24.3955	24.371	24.4627	23.6767	24.559		1.91563	1.95078	2.37703	2.12706	1.97317	1.65769	1.14607	1.72742	2.04021	2.00933	1.74874	2.11743	1.89921				2.18677	2.26105	2.80192	2.4845
P29144	Tripeptidyl-peptidase 2	TPP2	4.52833e+06	3.79736e+07	2.94907e+07	3.54278e+07	3.74456e+07	4.00748e+07	3.93112e+06	5.97775e+06	3.09379e+06	3.13392e+06	1.47047e+06	7.93151e+06	12		22.1105	25.1785	24.8138	25.0784	25.1583	25.2562	21.9065	22.5112	21.5609	21.5795	20.4878	22.9192		-0.667784	2.14695	1.61323	1.97843	2.188	2.12437	-0.376735	-0.156919	-0.769858	-0.87383	-1.44012	0.477581	0.520277				-0.7623	2.48842	1.90159	2.3109
P62753	40S ribosomal protein S6	RPS6	6.16325e+08	4.61421e+08	5.6232e+08	4.18819e+08	8.95223e+08	4.59798e+08	1.09437e+08	5.44117e+08	3.1938e+08	3.38365e+08	1.0605e+08	6.0889e+08	12		29.1991	28.7815	29.0668	28.6418	29.7377	28.7764	26.7055	29.0193	28.2507	28.334	26.6602	29.1816		6.42078	5.74997	5.86629	5.5418	6.76738	5.6446	4.42229	6.35125	5.9199	5.88064	4.7322	6.74002	5.83643				7.32956	6.66449	6.91486	6.47308
P38606	V-type proton ATPase catalytic subunit A	ATP6V1A	5.20589e+07	1.00256e+08	1.33821e+08	8.55446e+07	8.61273e+07	1.95891e+08	1.77262e+07	4.50539e+07	1.27004e+07	2.08472e+07	5.87472e+06	2.77615e+07	12		25.6336	26.5791	26.9957	26.3502	26.36	27.5455	24.0794	25.4251	23.5984	24.3133	22.4861	24.7266		2.85531	3.54757	3.7952	3.25023	3.38967	4.41366	1.79613	2.75706	1.26757	1.85998	0.55812	2.285	2.64796				3.25944	4.1118	4.47358	3.79641
O75534	Cold shock domain-containing protein E1	CSDE1	3.22592e+07	4.26685e+07	3.74151e+07	3.88102e+07	3.91918e+07	3.68004e+07	4.84858e+06	2.62086e+07	5.18074e+07	5.96567e+07	6.25758e+06	8.99508e+07	12		24.9432	25.3467	25.1571	25.2099	25.224	25.1332	22.2091	24.6435	25.6267	25.8302	22.5772	26.4226		2.16487	2.31513	1.95659	2.10999	2.25375	2.0014	-0.0741153	1.97545	3.29585	3.37681	0.649203	3.98105	2.16717				2.47129	2.68334	2.30633	2.46456
P21399	Cytoplasmic aconitate hydratase	ACO1	1.5102e+07	8.79268e+06	1.7663e+07	1.21071e+07	9488841	4.40909e+07	1.08342e+07	9.11413e+06	8.46805e+06	9.0979e+06	9.48855e+06	1.31818e+07	12		23.8482	23.0679	24.0742	23.5293	23.1778	25.394	23.3691	23.1197	23.0136	23.1171	23.1778	23.652		1.0699	0.0363315	0.873705	0.429399	0.207506	2.26216	1.08584	0.451585	0.682797	0.663737	1.24979	1.21046	0.851934				1.22133	0.0421099	1.02988	0.501558
Q6P2E9	Enhancer of mRNA-decapping protein 4	EDC4	7.7681e+06	4.50593e+06	8.28935e+06	6.07333e+06	1.50725e+07	5.59241e+06	8.29287e+06	7.55478e+06	4.06791e+06	3.5269e+06	7.3961e+06	5.3208e+06	12		22.8891	22.1034	22.9828	22.5341	23.8454	22.415	22.9834	22.849	21.9559	21.75	22.8183	22.3432		0.110798	-0.928147	-0.217696	-0.565892	0.875123	-0.716783	0.700195	0.18087	-0.374945	-0.703398	0.890363	-0.0983722	-0.0706573				0.126479	-1.07577	-0.256608	-0.660988
Q01780	Exosome component 10	EXOSC10	8.1859e+06	12519789	1.59827e+07	1.43781e+07	1.10954e+07	8.81959e+06	3.63123e+06	7.74124e+06	9.53933e+06	1.17582e+07	4.3788e+06	1.1482e+07	12		22.9647	23.5777	23.93	23.7774	23.4035	23.0723	21.792	22.8841	23.1855	23.4872	22.0621	23.4529		0.186377	0.546167	0.729486	0.677425	0.433163	-0.0595407	-0.491219	0.216045	0.854654	1.0338	0.134135	1.01129	0.439315				0.212757	0.633034	0.859878	0.791264
P51654	Glypican-3	GPC3	1.41537e+08	1.92309e+08	2.74774e+08	2.35005e+08	2.12536e+08	1.94703e+08	1.13273e+08	1.09282e+08	1.42549e+08	1.18656e+08	1.05551e+08	1.31103e+08	12		27.0766	27.5188	28.0337	27.8081	27.6631	27.5367	26.7552	26.7035	27.0869	26.8222	26.6534	26.9661		4.29827	4.48731	4.83315	4.70817	4.69284	4.40488	4.47198	4.03539	4.75608	4.36884	4.72539	4.52454	4.52557				4.90664	5.201	5.69705	5.49936
P33993	DNA replication licensing factor MCM7	MCM7	4.4005e+07	5.26217e+07	3.55111e+07	4.89063e+07	5.53245e+07	4.96269e+07	3.54769e+07	1.37373e+07	9.62223e+06	1.05736e+07	2.70322e+07	7.97546e+06	12		25.3912	25.6492	25.0818	25.5435	25.7214	25.5646	25.0804	23.7116	23.1979	23.334	24.6882	22.9271		2.61283	2.61762	1.88124	2.44357	2.75112	2.4328	2.79713	1.04351	0.867138	0.880602	2.7602	0.485552	1.96444				2.98264	3.03394	2.21751	2.8542
Q92538	Golgi-specific brefeldin A-resistance guanine nucleotide exchange factor 1	GBF1	1.34896e+08	1.42945e+08	1.78378e+08	1.76705e+08	1.49763e+08	155887583	1.05891e+06	1.46525e+08	1.10949e+08	1.11143e+08	3.51422e+06	6.80248e+07	12		27.0073	27.0909	27.4104	27.3968	27.1581	27.2159	20.0142	27.1266	26.7253	26.7278	21.7448	26.0196		4.22894	4.05935	4.20984	4.29682	4.18782	4.08411	-2.26909	4.45848	4.39453	4.27447	-0.183195	3.57797	3.27667				4.82749	4.70498	4.96233	5.01889
P49773	Histidine triad nucleotide-binding protein 1	HINT1	1.02328e+08	140210258	2.01076e+08	200228171	9.8398e+07	1.81917e+08	7.40895e+07	8.71991e+07	8.568e+07	7.7537e+07	4.73234e+07	5.98881e+07	12		26.6086	27.063	27.5832	27.5771	26.5521	27.4387	26.1428	26.3778	26.3525	26.2084	25.496	25.8358		3.83029	4.03148	4.38264	4.47712	3.58183	4.30689	3.85952	3.70972	4.02165	3.75502	3.56808	3.39418	3.90987				4.37242	4.67267	5.16602	5.22949
Q9C0C9	(E3-independent) E2 ubiquitin-conjugating enzyme	UBE2O	4.08859e+07	5.64319e+06	4.53976e+06	5.97107e+06	1.03139e+07	3.94224e+06	1.35388e+07	2.67022e+07	1.49359e+07	1.54887e+07	7.50894e+06	1.16332e+07	12		25.2851	22.4281	22.1142	22.5096	23.2981	21.9106	23.6906	24.6705	23.8323	23.8847	22.8402	23.4717		2.50677	-0.603459	-1.08634	-0.590389	0.327792	-1.22124	1.40736	2.00236	1.50148	1.43134	0.912209	1.03016	0.634837				2.86157	-0.699438	-1.28052	-0.689602
P14735	Insulin-degrading enzyme	IDE	2.11693e+07	2.56173e+07	23897537	1.48964e+07	2.93761e+07	2.12043e+07	1.25856e+07	1.77295e+07	9.57301e+06	1.12857e+07	1.05593e+07	1.6838e+07	12		24.3355	24.6106	24.5104	23.8285	24.8081	24.3379	23.5853	24.0796	23.1905	23.428	23.332	24.0052		1.55714	1.57908	1.30983	0.728515	1.83785	1.20603	1.30202	1.41156	0.859739	0.974632	1.40404	1.56363	1.31117				1.77753	1.83022	1.54396	0.85094
O94832	Unconventional myosin-Id	MYO1D	1.97723e+07	2.56073e+07	2.72942e+07	2.27815e+07	2.41347e+07	2.00903e+07	2.83515e+06	1.98024e+07	2.52847e+07	3.08849e+07	4.15628e+06	3.07099e+07	12		24.237	24.61	24.7021	24.4414	24.5246	24.26	21.435	24.2392	24.5918	24.8804	21.9869	24.8722		1.45865	1.57851	1.50157	1.34141	1.55431	1.12817	-0.84825	1.57108	2.26096	2.42703	0.0588932	2.43062	1.37191				1.6651	1.82957	1.76997	1.56683
Q8IX12	Cell division cycle and apoptosis regulator protein 1	CCAR1	5.76239e+06	1.20867e+07	1.84528e+07	1.65656e+07	2.16213e+07	2.62377e+07	1.65847e+07	4.46616e+06	6.96793e+06	6.86461e+06	1.63603e+07	5.47619e+06	12		22.4582	23.5269	24.1373	23.9817	24.366	24.6451	23.9833	22.0906	22.7323	22.7107	23.9637	22.3847		-0.320097	0.495383	0.93681	0.881739	1.39566	1.51331	1.7001	-0.577485	0.401496	0.25738	2.03573	-0.0568423	0.721932				-0.365403	0.574172	1.10426	1.02991
Q9NQT8	Kinesin-like protein KIF13B	KIF13B	5.15361e+06	8.0004e+06	18983817	9.36803e+06	9.48754e+06	9.59215e+06	1.51172e+06	5182220	1.32919e+06	1.50488e+06	3.13578e+06	1.15443e+07	12		22.2972	22.9316	24.1783	23.1593	23.1776	23.1934	20.5278	22.3051	20.3421	20.5212	21.5804	23.4607		-0.48118	-0.0998987	0.977743	0.0593669	0.207308	0.0616019	-1.75549	-0.36295	-1.98869	-1.93215	-0.347576	1.0191	-0.386901				-0.549285	-0.115787	1.15251	0.0693433
P52907	F-actin-capping protein subunit alpha-1	CAPZA1	3.85063e+07	5.9439e+07	6.93769e+07	62973293	5.88627e+07	5.9507e+07	2.86198e+07	4.02967e+07	2.19358e+07	2.53854e+07	9.89683e+06	1.31304e+07	12		25.1986	25.8249	26.048	25.9082	25.8109	25.8266	24.7705	25.2642	24.3868	24.5975	23.2385	23.6464		2.42026	2.79337	2.84743	2.80829	2.84056	2.69474	2.48727	2.59607	2.05598	2.14413	1.31057	1.20482	2.35029				2.76282	3.23764	3.35639	3.28021
Q9UNZ2	NSFL1 cofactor p47	NSFL1C	4.64736e+07	5.7588e+07	6.35107e+07	63808972	5.76623e+07	6.08216e+07	1.97153e+07	4.95077e+07	3.47e+07	3.38951e+07	9.50711e+06	2.32219e+07	12		25.4699	25.7793	25.9205	25.9273	25.7811	25.8581	24.2328	25.5612	25.0484	25.0146	23.1806	24.469		2.69158	2.74772	2.71997	2.82731	2.81083	2.72626	1.94957	2.89306	2.71763	2.56121	1.25261	2.0274	2.49376				3.07254	3.18474	3.20615	3.30243
Q9Y266	Nuclear migration protein nudC	NUDC	87192318	1.36526e+08	135152547	1.02172e+08	8.41791e+07	1.11284e+08	7.2666e+07	9.10118e+07	4.09433e+07	4.01096e+07	2.58539e+07	2.2665e+07	12		26.3777	27.0246	27.01	26.6064	26.327	26.7297	26.1148	26.4396	25.2871	25.2574	24.6239	24.434		3.59937	3.99306	3.80949	3.50647	3.35667	3.59786	3.83153	3.77146	2.95632	2.80408	2.69591	1.99238	3.32622				4.10881	4.62815	4.49042	4.09572
Q6UB35	Monofunctional C1-tetrahydrofolate synthase, mitochondrial	MTHFD1L	1.10668e+07	5.52331e+07	6.48146e+07	4.62435e+07	6.34934e+07	5.3344e+07	9.06482e+06	7.92247e+06	3.0821e+07	4.3043e+07	5.23355e+07	4.41542e+07	12		23.3997	25.719	25.9498	25.4627	25.9201	25.6688	23.1118	22.9175	24.8774	25.3593	25.6413	25.396		0.621407	2.68749	2.74929	2.3628	2.94981	2.537	0.828602	0.24943	2.54661	2.90591	3.71332	2.95446	2.25884				0.70936	3.11493	3.24071	2.75986
P02749	Beta-2-glycoprotein 1	APOH	1.13675e+07	1.33755e+07	3.53458e+07	3.71857e+07	367400	7.46602e+07	4.7714e+06	6.24764e+06	8.97457e+06	9.55942e+06	8.27014e+06	2.39801e+07	12		23.4384	23.6731	25.075	25.1482	18.487	26.1538	22.186	22.5749	23.0974	23.1885	22.9795	24.5153		0.660085	0.641547	1.87451	2.0483	-4.4833	3.02202	-0.0972634	-0.0932095	0.766609	0.735125	1.05151	2.07375	0.683306				0.753512	0.743584	2.20957	2.39251
O75367	Core histone macro-H2A.1	H2AFY	7.2965e+07	8.58592e+07	1.08824e+08	8.74269e+07	8.466e+07	105516052	1.4034e+08	7.1242e+07	5.73529e+07	7.50017e+07	8.9354e+07	6.39859e+07	12		26.1207	26.3555	26.6974	26.3816	26.3352	26.6529	27.0644	26.0862	25.7734	26.1604	26.413	25.9313		3.34237	3.32393	3.4969	3.28163	3.36488	3.52107	4.78111	3.41814	3.44256	3.70705	4.48506	3.48967	3.63786				3.81544	3.85259	4.12195	3.83309
O60264	SWI/SNF-related matrix-associated actin-dependent regulator of chromatin subfamily A member 5	SMARCA5	5.00869e+07	4.68907e+07	47022405	5.33869e+07	4.40629e+07	4.99412e+07	3.62192e+06	2.979e+07	1.79652e+07	1.40279e+07	5.30087e+06	2.91796e+07	12		25.5779	25.4828	25.4868	25.67	25.3931	25.5737	21.7883	24.8283	24.0987	23.7418	22.3378	24.7985		2.7996	2.45126	2.28632	2.57004	2.42277	2.44191	-0.49492	2.16024	1.7679	1.28843	0.409829	2.35687	1.87169				3.19585	2.84113	2.69499	3.00192
Q9BXJ9	N-alpha-acetyltransferase 15, NatA auxiliary subunit	NAA15	1.94724e+07	2.9537e+07	3.03646e+07	2.53396e+07	3.02311e+07	3.02858e+07	8.53871e+07	1.78115e+07	1.87068e+07	1.97198e+07	6.79014e+07	2.42638e+07	12		24.2149	24.816	24.8559	24.5949	24.8495	24.8521	26.3475	24.0863	24.1571	24.2331	26.0169	24.5323		1.4366	1.78448	1.65536	1.49494	1.87924	1.72032	4.06427	1.41822	1.82625	1.77978	4.08897	2.09072	2.10326				1.63993	2.0683	1.95125	1.74616
P07858	Cathepsin B	CTSB	5.10793e+07	7.55925e+07	9.12251e+07	7.47472e+07	4.90959e+07	8.51478e+07	4.22167e+07	5.02589e+07	4.84967e+07	4.09165e+07	2.18834e+07	4.07901e+07	12		25.6062	26.1717	26.4429	26.1555	25.5491	26.3435	25.3313	25.5829	25.5314	25.2862	24.3833	25.2817		2.8279	3.1402	3.2424	3.05557	2.57881	3.21164	3.04807	2.91479	3.20058	2.83281	2.45536	2.84013	2.94569				3.22816	3.63964	3.82197	3.56905
Q16543	Hsp90 co-chaperone Cdc37	CDC37	28161152	3.42022e+07	2.01752e+07	2.43409e+07	3.78984e+07	2.93653e+07	2.3845e+07	3.16898e+07	1.76705e+07	1.87583e+07	1.47573e+07	2.34628e+07	12		24.7472	25.0276	24.2661	24.5369	25.1756	24.8076	24.5072	24.9175	24.0748	24.161	23.8149	24.4839		1.96887	1.99605	1.06556	1.43693	2.20534	1.67579	2.22394	2.24943	1.74403	1.70766	1.88696	2.04229	1.85024				2.24754	2.31351	1.25602	1.6784
P54920	Alpha-soluble NSF attachment protein	NAPA	1.72781e+07	2.08506e+07	3.59367e+07	3.42019e+07	5.61957e+07	4.45439e+07	1.313e+07	2.02679e+07	43766257	3.51923e+07	9.46627e+06	3.04287e+07	12		24.0424	24.3136	25.099	25.0276	25.744	25.4087	23.6464	24.2727	25.3833	25.0688	23.1744	24.8589		1.26411	1.28205	1.89843	1.92763	2.77366	2.2769	1.36312	1.60461	3.05251	2.61539	1.24639	2.41735	1.97685				1.44303	1.48595	2.23776	2.25156
P04179	Superoxide dismutase [Mn], mitochondrial	SOD2	1.44683e+08	1.56205e+08	1.77513e+08	167964146	1.76498e+08	1.45848e+08	6.55302e+07	1.42497e+08	131342922	107234200	3.42645e+07	8.05028e+07	12		27.1083	27.2189	27.4034	27.3236	27.3951	27.1199	25.9657	27.0864	26.9688	26.6762	25.0302	26.2625		4.32999	4.18732	4.20283	4.22363	4.42478	3.98806	3.68241	4.41827	4.63796	4.22282	3.10224	3.82095	4.10344				4.94285	4.8533	4.95406	4.9334
Q8WWI1	LIM domain only protein 7	LMO7	2.09755e+07	4.56533e+07	3.65293e+07	3.76994e+07	2.90157e+07	3.44429e+07	4.75673e+06	1.16059e+07	3.34142e+07	3.83239e+07	3297908	4.69056e+07	12		24.3222	25.4442	25.1225	25.168	24.7903	25.0377	22.1815	23.4684	24.994	25.1917	21.6531	25.4833		1.54387	2.41268	1.92203	2.06809	1.82004	1.90588	-0.101707	0.800269	2.66316	2.73838	-0.27485	3.04167	1.71162				1.76238	2.7964	2.26558	2.41563
Q15366	Poly(rC)-binding protein 2	PCBP2	1.05596e+08	1.25998e+08	1.25957e+08	1.33045e+08	5.25392e+07	1.04605e+08	7.07457e+07	9.01468e+07	6.05367e+07	86516459	6.0714e+07	6.23092e+07	12		26.654	26.9088	26.9084	26.9873	25.6469	26.6404	26.0761	26.4258	25.8513	26.3665	25.8555	25.8929		3.87565	3.87729	3.70783	3.88739	2.6766	3.50855	3.79289	3.75768	3.5205	3.9131	3.92756	3.45136	3.65803				4.4242	4.49396	4.37059	4.54065
P12236	ADP/ATP translocase 3	SLC25A6	3.73523e+07	6.16538e+07	5.06151e+07	5.20837e+07	2.43991e+07	6.85201e+07	3.6987e+07	7.07956e+07	5.41359e+07	61827045	3.08349e+07	7.41642e+07	12		25.1547	25.8777	25.5931	25.6343	24.5403	26.03	25.1405	26.0772	25.6901	25.8817	24.8781	26.1442		2.37636	2.84615	2.39254	2.53438	1.57003	2.8982	2.85727	3.40907	3.35928	3.42837	2.95009	3.70264	2.86036				2.7127	3.29882	2.8202	2.96027
Q8WVM8	Sec1 family domain-containing protein 1	SCFD1	1.92891e+07	1.02051e+07	1.44614e+07	1.14573e+07	1.04549e+07	1.22644e+07	4.13103e+06	1.11261e+07	5.42262e+06	7.96596e+06	3.69774e+06	1.10779e+07	12		24.2013	23.2828	23.7857	23.4498	23.3177	23.548	21.9781	23.4074	22.3706	22.9254	21.8182	23.4012		1.42295	0.251241	0.585176	0.349816	0.347378	0.416154	-0.305175	0.739357	0.0397575	0.47205	-0.109758	0.959601	0.430712				1.62435	0.2912	0.689773	0.408601
Q99959	Plakophilin-2	PKP2	7.98795e+07	1.03038e+08	1.15108e+08	1.10526e+08	9.31199e+07	1.0059e+08	9070019	7.34409e+07	9.20977e+07	7.82872e+07	8.20407e+06	7.95406e+07	12		26.2513	26.6186	26.7784	26.7198	26.4726	26.5839	23.1127	26.1301	26.4567	26.2223	22.9679	26.2452		3.47299	3.58707	3.57789	3.61987	3.50229	3.45209	0.829429	3.46199	4.12586	3.76891	1.03994	3.8036	3.18683				3.96455	4.15758	4.21742	4.22817
P32119	Peroxiredoxin-2	PRDX2	1.62903e+08	1.84723e+08	2.06102e+08	1.90074e+08	1.20417e+08	1.72103e+08	9.22958e+07	1.23851e+08	5.87109e+07	5.56919e+07	2.11184e+07	2.81799e+07	12		27.2794	27.4608	27.6188	27.502	26.8435	27.3587	26.4598	26.884	25.8071	25.731	24.332	24.7482		4.5011	4.42925	4.41826	4.40204	3.87317	4.22688	4.17652	4.21594	3.47632	3.2776	2.40403	2.30658	3.80897				5.13818	5.13371	5.208	5.14178
O60832	H/ACA ribonucleoprotein complex subunit DKC1	DKC1	2.91408e+07	3.28474e+07	4.6054e+07	36211318	2.99077e+07	33874717	2.23923e+07	2.65534e+07	2.24039e+07	2.63751e+07	21557459	2.47877e+07	12		24.7965	24.9693	25.4568	25.1099	24.834	25.0137	24.4165	24.6624	24.4172	24.6527	24.3617	24.5631		2.01821	1.93773	2.2563	2.00999	1.86372	1.88188	2.13325	1.9943	2.08644	2.19931	2.43371	2.12154	2.07803				2.30386	2.24593	2.6596	2.34776
P05388	60S acidic ribosomal protein P0	RPLP0	1.72367e+08	1.92148e+08	202736107	1.84159e+08	1.146e+08	170014841	1.10291e+08	1.57656e+08	1.00472e+08	1.18121e+08	7.53769e+07	9.66821e+07	12		27.3609	27.5176	27.595	27.4564	26.772	27.3411	26.7167	27.2322	26.5822	26.8157	26.1676	26.5267		4.58258	4.4861	4.3945	4.35643	3.80173	4.20926	4.43349	4.56411	4.25142	4.36232	4.23965	4.08516	4.3139				5.23118	5.1996	5.18	5.08851
P37837	Transaldolase	TALDO1	1.07595e+08	114655330	1.56338e+08	1.69219e+08	1.09604e+08	1.23955e+08	6.666e+07	1.13404e+08	5.55629e+07	6.14644e+07	1.75978e+07	3.90466e+07	12		26.681	26.7727	27.2201	27.3343	26.7077	26.8852	25.9903	26.7569	25.7276	25.8732	24.0689	25.2187		3.90271	3.74119	4.01957	4.23437	3.73744	3.75342	3.70707	4.08881	3.39682	3.41988	2.14092	2.77711	3.57661				4.45508	4.33621	4.73805	4.94594
Q13057	Bifunctional coenzyme A synthase	COASY	2.59036e+07	3.54869e+07	4.0284e+07	4.06336e+07	4.09291e+07	3.6285e+07	2.15103e+07	2.48281e+07	2.11814e+07	2.50815e+07	1.7485e+07	2.46804e+07	12		24.6266	25.0808	25.2637	25.2762	25.2866	25.1129	24.3585	24.5655	24.3363	24.5801	24.0596	24.5569		1.84832	2.04924	2.06318	2.17622	2.31633	1.98105	2.07528	1.89738	2.00549	2.12675	2.13164	2.11528	2.06551				2.10992	2.37517	2.43196	2.54193
Q6PKG0	La-related protein 1	LARP1	102756812	7.98449e+07	5.52812e+07	7.75249e+07	8.19363e+07	3.37385e+07	6.86383e+07	1.04231e+08	6.9566e+07	9.95635e+07	6.06672e+07	6.38644e+07	12		26.6147	26.2507	25.7203	26.2082	26.288	25.0079	26.0325	26.6352	26.0519	26.5691	25.8544	25.9285		3.83633	3.21916	2.51976	3.10821	3.3177	1.87607	3.74927	3.96712	3.72108	4.11575	3.92644	3.48692	3.40365				4.37931	3.73115	2.97016	3.63053
Q9BUF5	Tubulin beta-6 chain	TUBB6	8.09353e+07	1.06724e+08	1.05916e+08	1.01462e+08	1.04049e+08	1.45483e+08	1.01248e+08	8.38147e+07	8.61353e+07	9.7657e+07	7.97376e+07	1.32205e+08	12		26.2703	26.6693	26.6583	26.5964	26.6327	27.1163	26.5933	26.3207	26.3601	26.5412	26.2488	26.9782		3.49193	3.63776	3.45782	3.49642	3.66239	3.98445	4.31007	3.65261	4.0293	4.08785	4.32079	4.53661	3.889				3.98617	4.21634	4.07589	4.08398
O14617	AP-3 complex subunit delta-1	AP3D1	6.49291e+06	7.76218e+06	8.70737e+06	7.28794e+06	7.60833e+06	4.40071e+06	4.47333e+07	6.26726e+06	3.17133e+06	4.65014e+06	2.50753e+07	2.56813e+06	12		22.6304	22.888	23.0538	22.7971	22.8591	22.0693	25.4148	22.5794	21.5967	22.1488	24.5798	21.2923		-0.147898	-0.14351	-0.146718	-0.302868	-0.111146	-1.06252	3.1316	-0.0886862	-0.734147	-0.304524	2.6518	-1.1493	0.132674				-0.168831	-0.166334	-0.172943	-0.353764
P49591	Serine--tRNA ligase, cytoplasmic	SARS	2.3286e+07	2.65884e+07	2.6458e+07	2.95163e+07	2.61212e+07	4.4203e+07	1.69507e+07	2.11245e+07	2.01625e+07	1.91586e+07	1.54862e+07	1.76161e+07	12		24.473	24.6643	24.6572	24.815	24.6387	25.3976	24.0148	24.3324	24.2652	24.1915	23.8845	24.0704		1.69463	1.63276	1.45668	1.71506	1.66842	2.26582	1.73159	1.66432	1.93437	1.73813	1.95651	1.62881	1.75726				1.93448	1.89244	1.71705	2.00327
P38159	RNA-binding motif protein, X chromosome	RBMX	6.90677e+07	7.45451e+07	8.67133e+07	8.59369e+07	8.33507e+07	8.3365e+07	3.72687e+07	5.28433e+07	3.65414e+07	3.43331e+07	2.05754e+07	2.36665e+07	12		26.0415	26.1516	26.3697	26.3568	26.3127	26.3129	25.1515	25.6552	25.123	25.0331	24.2944	24.4963		3.26318	3.12007	3.16923	3.25683	3.3424	3.18112	2.86822	2.98713	2.79223	2.57973	2.36645	2.05476	2.91511				3.72504	3.61631	3.73571	3.80412
Q14764	Major vault protein	MVP	5.09349e+07	4.31499e+07	3.40424e+07	5.51335e+07	5.95124e+07	4.98451e+07	1.19954e+07	4.44903e+07	2.82049e+07	3.47444e+07	8.26823e+06	3.59454e+07	12		25.6022	25.3629	25.0208	25.7164	25.8267	25.5709	23.516	25.407	24.7494	25.0503	22.9791	25.0993		2.82382	2.33131	1.82031	2.61648	2.85639	2.43913	1.23273	2.7389	2.41864	2.59691	1.05118	2.65772	2.29863				3.2235	2.7021	2.14568	3.05617
P29279	CCN family member 2	CCN2	2.92322e+07	2.83979e+07	49928546	4.53035e+07	313632	40003446	5.7371e+07	2.6635e+07	28159971	3.29743e+07	5.08685e+07	5.10166e+07	12		24.8011	24.7593	25.5734	25.4331	18.2587	25.2536	25.7738	24.6668	24.7471	24.9748	25.6003	25.6045		2.02272	1.72774	2.37284	2.33317	-4.71158	2.1218	3.49057	1.99873	2.41634	2.52147	3.6723	3.16288	1.92742				2.30901	2.00254	2.79697	2.72525
P17252	Protein kinase C alpha type	PRKCA	2.29571e+07	4.37154e+07	5.11249e+07	3.52549e+07	33434942	3.15114e+07	2.56916e+07	8.27922e+06	9.17329e+06	1.0117e+07	1.6938e+07	9.64032e+06	12		24.4524	25.3816	25.6075	25.0713	24.9949	24.9094	24.6148	22.9811	23.129	23.2703	24.0138	23.2006		1.67411	2.3501	2.407	1.97137	2.02456	1.77755	2.33155	0.312975	0.798206	0.816917	2.08579	0.759065	1.6091				1.91105	2.72388	2.83724	2.30265
Q9NR45	Sialic acid synthase	NANS	3.39472e+07	3.62043e+07	6.36907e+07	4.99126e+07	5.62325e+07	6.00224e+07	2.32589e+07	3.37216e+07	1.98557e+07	2.31544e+07	1.33783e+07	1.60511e+07	12		25.0168	25.1097	25.9246	25.5729	25.7449	25.839	24.4713	25.0072	24.2431	24.4648	23.6734	23.9362		2.23846	2.07812	2.72406	2.47295	2.77461	2.70718	2.18803	2.33908	1.91225	2.01141	1.74542	1.49458	2.22385				2.55528	2.40864	3.21097	2.88852
Q9Y285	Phenylalanine--tRNA ligase alpha subunit	FARSA	3.96078e+07	1.86473e+07	1.95121e+07	14039997	2.07535e+07	2.23346e+07	9.35186e+06	3.17296e+07	2.31767e+07	3.54138e+07	8.12964e+06	8.10638e+07	12		25.2393	24.1525	24.2179	23.743	24.3069	24.4128	23.1568	24.9193	24.4662	25.0778	22.9548	26.2726		2.46095	1.12093	1.01734	0.643092	1.33656	1.28096	0.873577	2.25123	2.13537	2.62444	1.02679	3.83097	1.71685				2.80926	1.29921	1.19919	0.751161
P46013	Proliferation marker protein Ki-67	MKI67	3.26191e+07	3.15208e+07	2.46382e+06	3.62551e+07	3.01646e+06	2.66451e+07	2.24542e+06	2.39263e+07	8.50163e+06	1.41079e+07	339632	6.82695e+06	12		24.9592	24.9098	21.2325	25.1117	21.5244	24.6674	21.0986	24.5121	23.0193	23.75	18.3736	22.7028		2.18088	1.87826	-1.96806	2.01173	-1.44587	1.53554	-1.18469	1.844	0.688505	1.29663	-3.55436	0.261226	0.295317				2.48956	2.17699	-2.31984	2.3498
P49321	Nuclear autoantigenic sperm protein	NASP	6.63834e+07	7.0092e+07	6.24238e+07	7.62441e+07	5.41637e+07	7.55276e+07	3.5626e+07	4.83299e+07	1.94376e+07	2.09812e+07	4.77499e+07	2.20024e+07	12		25.9843	26.0627	25.8956	26.1841	25.6908	26.1705	25.0864	25.5264	24.2123	24.3226	25.509	24.3912		3.20599	3.03121	2.69507	3.08417	2.72053	3.03868	2.80318	2.85832	1.88154	1.86923	3.58102	1.94958	2.72654				3.65975	3.51331	3.1768	3.60246
P02649	Apolipoprotein E	APOE	1.06863e+08	8.98374e+07	7.20107e+07	106548318	8.17578e+07	9.496e+07	5.41381e+07	82571187	95913096	86033597	7.73449e+07	9.04854e+07	12		26.6712	26.4208	26.1017	26.6669	26.2849	26.5008	25.6901	26.2991	26.5152	26.3584	26.2048	26.4312		3.89285	3.38927	2.90118	3.56699	3.31456	3.36899	3.4069	3.63105	4.18442	3.90503	4.27683	3.9896	3.65231				4.44383	3.92833	3.41976	4.1664
O60306	RNA helicase aquarius	AQR	1.96269e+07	5.67234e+06	1.38414e+07	4.72327e+06	2.6405e+07	5.02227e+06	3.87149e+06	1.72691e+07	1.31108e+07	1.41692e+07	9.64493e+06	1.08869e+07	12		24.2263	22.4355	23.7225	22.1714	24.6543	22.2599	21.8845	24.0417	23.6443	23.7563	23.2013	23.3761		1.448	-0.596026	0.521964	-0.928592	1.68401	-0.871914	-0.398787	1.3736	1.31345	1.30289	1.27337	0.934504	0.58804				1.65294	-0.690822	0.615262	-1.08464
P35237	Serpin B6	SERPINB6	3.73281e+07	4.22114e+07	6.51534e+07	4.84916e+07	2.84193e+07	1.37185e+08	3.5041e+07	3.12174e+07	1.6664e+07	2.06966e+07	1.85447e+07	1.37121e+07	12		25.1538	25.3311	25.9573	25.5312	24.7604	27.0315	25.0625	24.8958	23.9902	24.3029	24.1445	23.7089		2.37543	2.29959	2.75681	2.43129	1.79008	3.89972	2.7793	2.22776	1.65943	1.84952	2.21654	1.26736	2.29607				2.71164	2.66533	3.24958	2.83985
Q8IY81	pre-rRNA 2'-O-ribose RNA methyltransferase FTSJ3	FTSJ3	3.95882e+07	4.83327e+07	6.71179e+07	6.356e+07	5.99998e+07	1.02909e+08	2.69155e+07	2.68769e+07	4.61726e+07	4.55616e+07	4.38317e+07	5.65051e+07	12		25.2386	25.5265	26.0002	25.9216	25.8385	26.6168	24.6819	24.6799	25.4605	25.4413	25.3855	25.7519		2.46024	2.49496	2.79967	2.82167	2.86816	3.48497	2.39869	2.01178	3.12973	2.98795	3.4575	3.31029	2.85213				2.80845	2.89177	3.3001	3.29584
Q8WUM0	Nuclear pore complex protein Nup133	NUP133	7.14908e+06	8.2419e+06	1.61618e+07	1.73004e+07	1.17352e+07	1.77235e+07	6.61357e+06	6.82064e+06	6.87901e+06	7.70469e+06	5.01447e+06	7.66307e+06	12		22.7693	22.9745	23.9461	24.0443	23.4843	24.0792	22.657	22.7015	22.7138	22.8773	22.2577	22.8695		-0.00900592	-0.0569939	0.745563	0.944354	0.514047	0.947339	0.373754	0.0333864	0.382968	0.42394	0.329696	0.427907	0.421413				-0.0102806	-0.0660587	0.878828	1.10305
P49821	NADH dehydrogenase [ubiquinone] flavoprotein 1, mitochondrial	NDUFV1	5.04611e+07	4.73489e+07	6.19656e+07	5.40687e+07	5.78216e+07	6.40846e+07	1.28694e+07	4.34447e+07	1.89179e+07	1.82009e+07	1.03576e+07	1.45259e+07	12		25.5887	25.4968	25.885	25.6883	25.7851	25.9335	23.6174	25.3727	24.1732	24.1175	23.3042	23.7921		2.81034	2.46529	2.68444	2.58834	2.81481	2.80165	1.3342	2.70459	1.84245	1.66414	1.37622	1.35054	2.20308				3.2081	2.85739	3.16427	3.0233
P13861	cAMP-dependent protein kinase type II-alpha regulatory subunit	PRKAR2A	2.66762e+07	3.56443e+07	2.4532e+07	4.01432e+07	4.78736e+07	6.52456e+07	1.17047e+07	2.63393e+07	1.6071e+07	1.99297e+07	8.72586e+06	1.97589e+07	12		24.6691	25.0872	24.5482	25.2587	25.5127	25.9594	23.4806	24.6507	23.938	24.2484	23.0569	24.236		1.89072	2.05563	1.34764	2.1587	2.54243	2.82756	1.19734	1.98263	1.60716	1.79505	1.1289	1.79441	1.86068				2.15833	2.38257	1.58852	2.52146
P26196	Probable ATP-dependent RNA helicase DDX6	DDX6	1.40132e+07	2.11548e+07	2.84558e+07	2.64529e+07	8.10446e+06	2.86944e+07	8.57059e+06	1.02955e+07	2.14653e+07	2.88138e+07	2.06064e+07	4.47388e+07	12		23.7403	24.3345	24.7622	24.6569	22.9503	24.7743	23.031	23.2955	24.3555	24.7803	24.2966	25.415		0.96195	1.30294	1.5617	1.55698	-0.0200094	1.64244	0.747718	0.627418	2.0247	2.32689	2.36862	2.97344	1.50623				1.0981	1.51017	1.84084	1.81862
Q15717	ELAV-like protein 1	ELAVL1	4.27967e+07	7.50804e+07	8.94342e+07	7.69134e+07	7.32693e+07	6.88791e+07	3.87697e+07	4.36433e+07	3.68188e+07	4.11564e+07	3.73107e+07	5.50195e+07	12		25.351	26.1619	26.4143	26.1967	26.1267	26.0376	25.2084	25.3793	25.1339	25.2946	25.1531	25.7134		2.57266	3.13039	3.2138	3.09678	3.15641	2.90574	2.92518	2.71117	2.80314	2.84125	3.22512	3.27186	2.98779				2.93679	3.62827	3.78825	3.61719
P02760	Protein AMBP	AMBP	2.61366e+07	2.80564e+07	4.71899e+07	4.32576e+07	2.07273e+07	4.8662e+07	1.85841e+07	1.64301e+07	1.42406e+07	16493135	1.87572e+07	27176323	12		24.6396	24.7418	25.492	25.3665	24.305	25.5363	24.1476	23.9698	23.7635	23.9754	24.1609	24.6958		1.86124	1.71029	2.29145	2.2665	1.33474	2.40447	1.86432	1.30175	1.43271	1.522	2.23297	2.25426	1.87306				2.12467	1.9823	2.70104	2.64738
O94973	AP-2 complex subunit alpha-2	AP2A2	8.16661e+07	6.67905e+07	9.43594e+07	7.46191e+07	7.00092e+07	7.8948e+07	3.94579e+07	7.31862e+07	5.88601e+07	6.33037e+07	6.53446e+07	6.84407e+07	12		26.2832	25.9931	26.4917	26.153	26.061	26.2344	25.2338	26.1251	25.8108	25.9158	25.9616	26.0284		3.5049	2.9616	3.29114	3.05309	3.09075	3.10258	2.95057	3.45698	3.47999	3.46242	4.0336	3.58677	3.3312				4.00098	3.43263	3.87941	3.56615
Q15397	Pumilio homolog 3	PUM3	3.86545e+06	9.92253e+06	8.76219e+06	1.10277e+07	1.17337e+07	8.87024e+06	9.52986e+06	2.51072e+06	9.65936e+06	1.06504e+07	1.1987e+07	8.59505e+06	12		21.8822	23.2423	23.0629	23.3946	23.4842	23.0805	23.184	21.2597	23.2035	23.3444	23.515	23.0351		-0.896126	0.210737	-0.137664	0.294687	0.513859	-0.051279	0.900779	-1.40842	0.872694	0.891038	1.587	0.59349	0.280899				-1.02296	0.244254	-0.16227	0.344208
P07737	Profilin-1	PFN1	3.62074e+08	4.44397e+08	5.00735e+08	4.21414e+08	3.72825e+08	3.73338e+08	2.1092e+08	2.71726e+08	1.44913e+08	1.4657e+08	1.04876e+08	1.07059e+08	12		28.4317	28.7273	28.8995	28.6507	28.4739	28.4759	27.6521	28.0176	27.1106	27.127	26.6441	26.6738		5.65338	5.69573	5.69895	5.55072	5.50363	5.34409	5.36887	5.34949	4.77981	4.67364	4.71614	4.23224	5.21389				6.45354	6.60163	6.71761	6.48349
Q9Y5M8	Signal recognition particle receptor subunit beta	SRPRB	2.481e+07	5.59005e+07	71897642	4.79552e+07	6.3234e+07	5.55617e+07	1.34614e+07	3.53965e+07	1.99125e+07	2.2716e+07	1.601e+07	2.17296e+07	12		24.5644	25.7364	26.0994	25.5152	25.9142	25.7276	23.6823	25.0771	24.2472	24.4372	23.9325	24.3732		1.78608	2.70482	2.89892	2.41524	2.9439	2.59577	1.39908	2.40901	1.91637	1.98384	2.0045	1.93158	2.24909				2.03888	3.13501	3.41708	2.82111
Q9H501	ESF1 homolog	ESF1	1.9819e+07	1.01795e+07	1.89144e+07	1.27366e+07	1.16707e+07	1.66875e+07	3.25024e+07	1.99127e+07	1.24243e+07	1.57936e+07	1.06972e+07	1.01306e+07	12		24.2404	23.2792	24.173	23.6025	23.4764	23.9923	24.954	24.2472	23.5667	23.9128	23.3507	23.2722		1.46205	0.247624	0.972456	0.502524	0.506094	0.860443	2.6708	1.57909	1.23586	1.45947	1.42277	0.830633	1.14582				1.66898	0.287007	1.14628	0.586971
Q9Y2L1	Exosome complex exonuclease RRP44	DIS3	1.59046e+07	1.23697e+07	1.58465e+07	1.30896e+07	1.43275e+07	1.02184e+07	1.00319e+07	1.24484e+07	1.39401e+07	1.39433e+07	8.04254e+06	1.63973e+07	12		23.9229	23.5603	23.9177	23.6419	23.7723	23.2847	23.2581	23.5695	23.7327	23.7331	22.9392	23.967		1.1446	0.528765	0.71714	0.541965	0.801986	0.15285	0.974843	0.901365	1.40194	1.27971	1.01125	1.52537	0.915149				1.30661	0.612864	0.845325	0.63304
O95757	Heat shock 70 kDa protein 4L	HSPA4L	9.5505e+06	1.11048e+07	1.80303e+07	1.37211e+07	1.81457e+07	1.59347e+07	9.44061e+06	1.50562e+07	1.01221e+07	9.66325e+06	6.66581e+06	8.67215e+06	12		23.1871	23.4047	24.1039	23.7099	24.1131	23.9257	23.1704	23.8439	23.271	23.2041	22.6683	23.048		0.408813	0.373142	0.903397	0.609947	1.14283	0.793849	0.887204	1.17577	0.940204	0.75071	0.740379	0.606373	0.777718				0.466675	0.432489	1.06487	0.712446
P49753	Acyl-coenzyme A thioesterase 2, mitochondrial	ACOT2	1.69342e+07	17177265	2.39195e+07	2.59517e+07	6667259	6.61122e+06		9.0635e+06	1.48286e+06	1.72747e+06		4249003	10		24.0134	24.034	24.5117	24.6293	22.6687	22.6565		23.1116	20.5	20.7202		22.0187		1.2351	1.00246	1.31116	1.52938	-0.301632	-0.475337		0.443547	-1.83085	-1.73314		-0.422891	0.07578				1.40992	1.1619	1.54552	1.78639
Q06033	Inter-alpha-trypsin inhibitor heavy chain H3	ITIH3	7.57148e+06	1.27155e+07	9.73413e+06	4.42314e+07	1.24382e+07	1.19618e+07	2.0899e+06	5.78752e+06	1.03814e+06	2.71644e+06	4.38098e+06	5.21308e+06	12		22.8521	23.6001	23.2146	25.3986	23.5683	23.5119	20.995	22.4645	19.9856	21.3733	22.0628	22.3137		0.073812	0.568543	0.0140967	2.29862	0.597979	0.380109	-1.28825	-0.203575	-2.34523	-1.08008	0.134853	-0.12788	-0.0814163				0.0842591	0.658968	0.0166164	2.68489
P28370	Probable global transcription activator SNF2L1	SMARCA1	138065708	5.27778e+07	1.75781e+07	1.02752e+08	1.33972e+07	8.45205e+07	2.89709e+07	1.20022e+08	2.30973e+08	2.59952e+08	5.01905e+07	4.89134e+08	12		27.0408	25.6534	24.0673	26.6146	23.6754	26.3328	24.7881	26.8387	27.7831	27.9537	25.5809	28.8657		4.26245	2.62189	0.866756	3.51465	0.705137	3.20098	2.50486	4.17064	5.45235	5.5003	3.65294	6.42407	3.57308				4.86574	3.03889	1.02168	4.10527
P27694	Replication protein A 70 kDa DNA-binding subunit	RPA1	4.32833e+07	4.35864e+07	4.63382e+07	4.15064e+07	1.58972e+07	3.79327e+07	3.63358e+07	3.81504e+07	3.65408e+07	3.6111e+07	2.35712e+07	4.13146e+07	12		25.3673	25.3774	25.4657	25.3068	23.9223	25.1769	25.1149	25.1852	25.123	25.1059	24.4905	25.3001		2.58898	2.34583	2.26517	2.20688	0.951975	2.04512	2.83164	2.51711	2.7922	2.65257	2.56255	2.85857	2.38488				2.95541	2.71893	2.67006	2.57774
P02647	Apolipoprotein A-I	APOA1	69912130	8.49566e+07	103795300	1.15496e+08	1.12551e+08	1.16237e+08	5.79807e+07	9.33873e+07	9.59099e+07	8.1086e+07	5.45735e+07	9.20161e+07	12		26.059	26.3402	26.6292	26.7833	26.746	26.7925	25.7891	26.4767	26.5152	26.2729	25.7017	26.4554		3.28071	3.30868	3.42864	3.68332	3.77571	3.66067	3.50582	3.80863	4.18437	3.81958	3.77373	4.0138	3.68697				3.74505	3.83492	4.0415	4.30229
Q8WWM7	Ataxin-2-like protein	ATXN2L	5.32635e+06	2.47959e+07	2.12738e+07	3.48138e+07	2.51808e+07	2.8704e+07	3.71087e+06	1.31092e+07	2.68355e+06	3.13879e+06	3.19858e+06	9.02666e+06	12		22.3447	24.5636	24.3426	25.0532	24.5858	24.7747	21.8233	23.6441	21.3557	21.5818	21.609	23.1058		-0.433618	1.53206	1.14205	1.95321	1.61553	1.64293	-0.45992	0.975991	-0.975091	-0.871588	-0.318971	0.664177	0.538896				-0.494991	1.77573	1.34618	2.28144
Q9HCE6	Rho guanine nucleotide exchange factor 10-like protein	ARHGEF10L	2.91721e+07	3.02575e+07	3.29595e+07	3.48896e+07	3.03344e+07	2.16241e+07	2.27044e+07	5.13406e+07	2.5256e+07	2.82467e+07	1.48528e+07	1.89318e+07	12		24.7981	24.8508	24.9742	25.0563	24.8545	24.3661	24.4365	25.6136	24.5901	24.7516	23.8242	24.1743		2.01975	1.81925	1.77367	1.95635	1.88416	1.23431	2.15322	2.94551	2.25932	2.29822	1.89626	1.73272	1.99773				2.30562	2.1086	2.0907	2.2851
P35658	Nuclear pore complex protein Nup214	NUP214	8.9808e+06	1.33545e+07	2.56299e+07	1.92353e+07	1.65556e+07	1.42075e+07	1.88016e+07	9.78993e+06	8.18367e+06	8.81571e+06	1.29941e+07	9.28588e+06	12		23.0984	23.6708	24.6113	24.1972	23.9808	23.7601	24.1644	23.2229	22.9643	23.0716	23.6314	23.1466		0.320079	0.639287	1.4108	1.0973	1.01052	0.628326	1.88111	0.554777	0.633514	0.618279	1.70338	0.705023	0.933534				0.365383	0.740964	1.66298	1.2817
P42285	Exosome RNA helicase MTR4	MTREX	5.8409e+06	9.659e+06	32553274	1.21668e+07	1.02163e+07	8.99051e+06	1.67168e+07	8.66149e+06	9.02793e+06	9.79224e+06	1.66258e+07	9.36564e+06	12		22.4778	23.2034	24.9563	23.5364	23.2844	23.1	23.9948	23.0462	23.106	23.2232	23.9869	23.1589		-0.300573	0.171903	1.75578	0.436494	0.314082	-0.0318493	1.71155	0.378094	0.775161	0.769841	2.05895	0.717362	0.729733				-0.343115	0.199243	2.06961	0.509845
P22307	Non-specific lipid-transfer protein	SCP2	56671071	6.67688e+07	8.46205e+07	7.85536e+07	7.34382e+07	6.30656e+07	3.08542e+07	4.68401e+07	2.8829e+07	3.28294e+07	2.95005e+07	4.2948e+07	12		25.7561	25.9927	26.3345	26.2272	26.13	25.9104	24.879	25.4812	24.781	24.9685	24.8142	25.3561		2.97778	2.96113	3.13398	3.12723	3.15973	2.77853	2.59572	2.81315	2.45021	2.51512	2.88626	2.9145	2.85945				3.39924	3.43209	3.69416	3.65274
P62424	60S ribosomal protein L7a	RPL7A	2.56511e+08	2.69189e+08	2.67605e+08	2.5703e+08	262891015	2.23907e+08	1.07337e+08	2.19213e+08	1.56566e+08	1.82117e+08	1.04296e+08	1.16539e+08	12		27.9344	28.004	27.9955	27.9374	27.9699	27.7383	26.6776	27.7078	27.2222	27.4403	26.6361	26.7962		5.15611	4.9725	4.795	4.83741	4.9996	4.60651	4.39433	5.03967	4.8914	4.98693	4.70813	4.35466	4.81185				5.88589	5.76337	5.65209	5.65032
Q08257	Quinone oxidoreductase	CRYZ	5.0469e+07	7.21848e+07	7.66251e+07	7.65017e+07	8.03339e+07	62899640	3.84994e+07	5.8793e+07	3.02094e+07	3.23995e+07	2.46188e+07	2.20749e+07	12		25.5889	26.1052	26.1913	26.189	26.2595	25.9065	25.1983	25.8091	24.8485	24.9495	24.5533	24.3959		2.81056	3.07365	2.99079	3.08904	3.28921	2.77473	2.91509	3.14105	2.51769	2.4961	2.62529	1.95432	2.80646				3.20836	3.56251	3.52538	3.60814
P30405	Peptidyl-prolyl cis-trans isomerase F, mitochondrial	PPIF	3.94932e+07	1.00349e+08	8.29406e+07	8.47318e+07	3.64741e+07	6.51764e+07	3.22564e+07	5.93487e+07	4.16428e+07	4.37088e+07	1.97969e+07	3.42566e+07	12		25.2351	26.5805	26.3056	26.3364	25.1204	25.9578	24.9431	25.8227	25.3116	25.3814	24.2388	25.0299		2.45677	3.54891	3.10505	3.23645	2.15007	2.82602	2.65984	3.15462	2.98076	2.92805	2.3108	2.5883	2.8288				2.8045	4.11336	3.66006	3.78033
Q96T76	MMS19 nucleotide excision repair protein homolog	MMS19	2.10513e+07	3.68335e+07	28814413	3.28177e+07	2.78963e+07	3.54187e+07	1.43806e+07	1.88549e+07	4.56595e+07	4.16785e+07	1.05373e+07	3.40998e+07	12		24.3274	25.1345	24.7803	24.968	24.7336	25.078	23.7776	24.1684	25.4444	25.3128	23.329	25.0233		1.54908	2.10297	1.57976	1.86803	1.76327	1.94619	1.49438	1.50035	3.11361	2.85943	1.40104	2.58167	1.97998				1.76833	2.43745	1.86214	2.18194
Q99623	Prohibitin-2	PHB2	1.6653e+08	2.31461e+08	2.48872e+08	2.46373e+08	2.42043e+08	2.27962e+08	1.03794e+08	1.2785e+08	9.99471e+07	1.21002e+08	1.22203e+08	1.29182e+08	12		27.3112	27.7862	27.8908	27.8763	27.8507	27.7642	26.6291	26.9299	26.5747	26.8505	26.8647	26.9448		4.53287	4.75466	4.69031	4.77632	4.8804	4.6324	4.3459	4.26179	4.24386	4.39709	4.93673	4.50325	4.57963				5.17444	5.51087	5.52868	5.57896
Q15555	Microtubule-associated protein RP/EB family member 2	MAPRE2	3.31286e+07	4.0465e+07	70106689	6.15049e+07	3.57296e+07	3.60823e+07	1.21592e+07	3.58717e+07	2.84801e+07	3.2492e+07	1.33234e+07	3.93773e+07	12		24.9816	25.2702	26.063	25.8742	25.0906	25.1048	23.5355	25.0963	24.7634	24.9536	23.6675	25.2309		2.20324	2.23863	2.86253	2.77425	2.12032	1.97297	1.2523	2.42825	2.43265	2.50022	1.73949	2.78927	2.27618				2.51508	2.59468	3.37419	3.24045
Q00266	S-adenosylmethionine synthase isoform type-1	MAT1A	49439503	1.04862e+08	7.79985e+07	1.2183e+08	7.86227e+07	1.13713e+08	3.9465e+07	4.29309e+07	3.6399e+07	4.12022e+07	2.34431e+07	3.88491e+07	12		25.5592	26.6439	26.2169	26.8603	26.2284	26.7608	25.2341	25.3555	25.1174	25.2962	24.4827	25.2114		2.78083	3.61238	3.01642	3.76034	3.25815	3.62899	2.95083	2.68742	2.78659	2.84285	2.55469	2.76979	3.05411				3.17442	4.18692	3.55559	4.39225
Q8NC51	Plasminogen activator inhibitor 1 RNA-binding protein	SERBP1	6.07959e+07	5.24415e+07	7.01281e+07	5.87147e+07	5.07098e+07	4.58175e+07	4.21472e+07	5.61898e+07	3.45813e+07	3.28292e+07	1.06175e+07	1.47884e+07	12		25.8575	25.6442	26.0635	25.8072	25.5958	25.4494	25.3289	25.7438	25.0435	24.9685	23.3399	23.818		3.07914	2.61267	2.86297	2.70727	2.62547	2.31758	3.04569	3.07572	2.71269	2.51511	1.41197	1.37638	2.52855				3.51495	3.0282	3.37471	3.16222
Q969V3	Nicalin	NCLN	1.49289e+07	22842781	3.91483e+07	19410708	1.99188e+07	4.22796e+07	3.5779e+06	1.38886e+07	1.19787e+07	1.49505e+07	4.83694e+06	1.2972e+07	12		23.8316	24.4452	25.2224	24.2103	24.2476	25.3335	21.7707	23.7274	23.514	23.8337	22.2057	23.6289		1.05327	1.4137	2.02192	1.1104	1.27733	2.20164	-0.512562	1.05931	1.18317	1.38032	0.277695	1.18731	1.13779				1.20235	1.63854	2.38333	1.297
P40763	Signal transducer and activator of transcription 3	STAT3	1.93081e+07	3.1732e+07	4.58022e+07	3.96438e+07	6.35654e+06	4.97805e+07	9.38441e+06	1.07605e+07	9.24619e+06	1.03573e+07	5.835e+06	6.92386e+06	12		24.2027	24.9194	25.4489	25.2406	22.5998	25.5691	23.1618	23.3592	23.1404	23.3041	22.4763	22.7231		1.42437	1.8879	2.24839	2.14064	-0.370485	2.43726	0.87859	0.691158	0.809625	0.850781	0.548333	0.281561	1.15234				1.62597	2.18816	2.65028	2.50037
P52701	DNA mismatch repair protein Msh6	MSH6	1.35623e+07	3.12169e+07	1.06438e+07	3.38705e+07	1.23222e+07	7.47926e+06	7.02113e+06	1.18555e+07	1.3817e+07	1.45968e+07	8.24168e+06	1.2773e+07	12		23.6931	24.8958	23.3435	25.0135	23.5548	22.8345	22.7433	23.4991	23.7199	23.7991	22.9745	23.6066		0.914769	1.86429	0.142984	1.91358	0.584465	-0.297357	0.460027	0.830963	1.38913	1.34578	1.04654	1.16501	0.946682				1.04424	2.1608	0.168542	2.23515
P30519	Heme oxygenase 2	HMOX2	1.28351e+07	54603659	2.50604e+07	1.80744e+07	23453809	2.22631e+07	8.22575e+06	1.60677e+07	1.08487e+07	1.12145e+07	8.08463e+06	1.08264e+07	12		23.6136	25.7025	24.5789	24.1074	24.4833	24.4081	22.9717	23.9377	23.371	23.4189	22.9468	23.368		0.835261	2.67095	1.37838	1.0075	1.51302	1.27633	0.688472	1.26957	1.04022	0.965499	1.01878	0.926463	1.21587				0.953481	3.09576	1.62476	1.1768
Q13561	Dynactin subunit 2	DCTN2	3.12431e+07	4.41342e+07	45078349	45860497	4.59217e+07	4.9567e+07	8.97454e+07	3.17694e+07	2.34975e+07	2.32611e+07	5.10232e+07	2.59775e+07	12		24.897	25.3954	25.4259	25.4507	25.4527	25.5629	26.4193	24.9211	24.486	24.4714	25.6046	24.6308		2.1187	2.36385	2.22541	2.3508	2.48238	2.43105	4.13609	2.25305	2.1552	2.01805	3.67668	2.18917	2.53337				2.41858	2.73982	2.62319	2.74584
Q99714	3-hydroxyacyl-CoA dehydrogenase type-2	HSD17B10	8.92518e+07	1.16769e+08	1.49767e+08	1.27384e+08	1.38076e+08	1.04438e+08	1.25074e+08	9.40858e+07	6.50277e+07	8.24842e+07	135060487	8.25028e+07	12		26.4114	26.7991	27.1581	26.9246	27.0409	26.6381	26.8982	26.4875	25.9546	26.2976	27.009	26.2979		3.63305	3.76755	3.95762	3.82466	4.0706	3.50625	4.61496	3.81938	3.62375	3.84425	5.08106	3.85636	3.96662				4.14726	4.36676	4.66503	4.46738
P55795	Heterogeneous nuclear ribonucleoprotein H2	HNRNPH2	1.38836e+07	2.94737e+07	28294926	2.29e+07	2.01551e+06	1.95343e+07	1.06216e+07	1.10063e+07	9.74206e+06	8.90147e+06	1.08816e+07	1.20844e+07	12		23.7269	24.8129	24.754	24.4488	20.9427	24.2195	23.3405	23.3918	23.2158	23.0856	23.3754	23.5266		0.94855	1.78139	1.55352	1.34889	-2.02758	1.08769	1.05725	0.723732	0.884994	0.632246	1.44742	1.08506	0.87693				1.08281	2.06471	1.8312	1.57557
P22570	NADPH:adrenodoxin oxidoreductase, mitochondrial	FDXR	2.78205e+07	3.09125e+07	4.82843e+07	4.80466e+07	2.72652e+07	3.88546e+07	2.52722e+07	2.62281e+07	2.26649e+07	3.27745e+07	1.83162e+07	2.30695e+07	12		24.7296	24.8817	25.525	25.5179	24.7006	25.2116	24.591	24.6446	24.434	24.9661	24.1266	24.4595		1.95131	1.85015	2.32453	2.41798	1.73026	2.07976	2.3078	1.97652	2.10316	2.5127	2.19865	2.0179	2.12256				2.2275	2.14441	2.74002	2.82432
P56199	Integrin alpha-1	ITGA1	1.32435e+07	2.77861e+07	2.28776e+07	2.78561e+07	2.70228e+07	2.00242e+07	4.52324e+06	1.14991e+07	3.60437e+06	3.91639e+06	1.22629e+07	4.6728e+06	12		23.6588	24.7279	24.4474	24.7315	24.6877	24.2552	22.1089	23.455	21.7813	21.9011	23.5478	22.1559		0.880445	1.69632	1.24691	1.63154	1.71738	1.12342	-0.17432	0.786931	-0.549486	-0.552272	1.61983	-0.285729	0.761748				1.00506	1.96612	1.46979	1.90572
P55263	Adenosine kinase	ADK	8.02457e+07	9.10435e+07	4.36402e+07	9.24136e+07	2.97547e+07	9.09872e+07	6.18891e+07	8.26272e+07	4.778e+07	4.52858e+07	2.92308e+07	3.65678e+07	12		26.2579	26.4401	25.3792	26.4616	24.8266	26.4392	25.8832	26.3001	25.5099	25.4326	24.801	25.1241		3.47959	3.40851	2.17863	3.36165	1.85632	3.30734	3.59994	3.63203	3.1791	2.97919	2.87302	2.68249	3.04482				3.97208	3.95063	2.56805	3.92657
Q92544	Transmembrane 9 superfamily member 4	TM9SF4	2.66245e+07	3.23249e+07	4.85901e+07	3.58833e+07	1.68378e+07	2.85246e+07	1.98801e+07	2.26078e+07	1.85001e+07	2.40531e+07	1.7177e+07	2.08976e+07	12		24.6663	24.9461	25.5342	25.0968	24.0052	24.7657	24.2448	24.4303	24.141	24.5197	24.034	24.3168		1.88792	1.9146	2.33364	1.99686	1.03491	1.63388	1.96158	1.76223	1.81023	2.06635	2.106	1.87525	1.86529				2.15513	2.21912	2.75076	2.33243
Q15785	Mitochondrial import receptor subunit TOM34	TOMM34	4.33207e+07	6.20784e+07	5.83575e+07	5.21098e+07	15389925	4.27222e+07	1.72496e+07	29646322	2.13923e+07	2.47895e+07	1.82229e+07	1.8725e+07	12		25.3686	25.8876	25.7984	25.6351	23.8755	25.3485	24.0401	24.8213	24.3506	24.5632	24.1192	24.1585		2.59022	2.85605	2.59789	2.5351	0.905189	2.21666	1.75682	2.15326	2.01979	2.10986	2.19128	1.71687	2.13742				2.95683	3.31029	3.06225	2.96112
P23381	Tryptophan--tRNA ligase, cytoplasmic	WARS	8.37909e+07	1.14563e+08	1.2953e+08	1.18027e+08	1.19723e+08	1.31732e+08	3.94338e+07	2.37821e+07	1.38259e+07	1.70018e+07	2.27249e+07	1.36901e+07	12		26.3203	26.7716	26.9487	26.8145	26.8351	26.973	25.2329	24.5034	23.7209	24.0192	24.4378	23.7066		3.54196	3.74002	3.74819	3.71459	3.86483	3.8412	2.94968	1.83528	1.39007	1.56582	2.5098	1.26505	2.83054				4.04328	4.33486	4.41816	4.33881
P49756	RNA-binding protein 25	RBM25	2.23104e+07	2.73075e+07	13357016	1.82769e+07	3.08738e+07	4.27353e+06	3.69564e+06	1.72647e+07	2.31308e+07	2.86291e+07	3.08005e+06	3.7203e+07	12		24.4112	24.7028	23.6711	24.1235	24.8799	22.027	21.8174	24.0413	24.4633	24.771	21.5545	25.1489		1.63288	1.67126	0.470571	1.02357	1.90958	-1.10482	-0.465853	1.37323	2.13251	2.31761	-0.373449	2.70733	1.10787				1.864	1.93706	0.554683	1.19557
Q99880	Histone H2B type 1-L	HIST1H2BL			287519	3.82913e+06	4.77201e+06	2.29598e+06	9.18491e+06	6257704	6729570	7164633	7.29696e+06	4.25045e+06	10				18.1333	21.8686	22.1862	21.1307	23.1308	22.5772	22.6821	22.7725	22.7989	22.0192				-5.06723	-1.23136	-0.784128	-2.00114	0.847589	-0.0908872	0.35128	0.319095	0.870895	-0.4224	-0.720828						-5.97297	-1.43829
Q96AG4	Leucine-rich repeat-containing protein 59	LRRC59	1.21577e+08	1.33979e+08	1.86187e+08	1.42147e+08	1.39358e+08	1.23372e+08	99168548	1.09438e+08	7.55823e+07	9.29466e+07	6.67129e+07	7.27282e+07	12		26.8573	26.9974	27.4722	27.0828	27.0542	26.8784	26.5634	26.7055	26.1715	26.4699	25.9915	26.116		4.07896	3.96589	4.27165	3.98286	4.08393	3.74662	4.28013	4.03745	3.84074	4.01653	4.06349	3.67443	4.00356				4.65629	4.59665	5.03519	4.65216
P50579	Methionine aminopeptidase 2	METAP2	1.76693e+07	1.37677e+07	1.27451e+07	1.23824e+07	3.98673e+06	1.67977e+07	9873949	12433091	9.91215e+06	1.06924e+07	4.30861e+06	1.10904e+07	12		24.0747	23.7148	23.6034	23.5618	21.9268	24.0018	23.2352	23.5677	23.2408	23.3501	22.0388	23.4028		1.29641	0.683249	0.40291	0.461844	-1.04352	0.869942	0.951951	0.899592	0.909964	0.896719	0.110822	0.96123	0.616759				1.4799	0.791918	0.474929	0.539455
Q9NP81	Serine--tRNA ligase, mitochondrial	SARS2	1.44251e+07	2.1158e+07	2.03638e+07	1.9713e+07	1.70761e+07	1.95207e+07	1.27878e+07	1.72279e+07	1.42538e+07	1.38962e+07	1.04766e+07	1.32609e+07	12		23.7821	24.3347	24.2795	24.2326	24.0255	24.2185	23.6083	24.0382	23.7648	23.7282	23.3207	23.6607		1.00375	1.30316	1.07898	1.1327	1.05518	1.08668	1.32502	1.37016	1.43404	1.27482	1.3927	1.21909	1.22302				1.14582	1.51042	1.27184	1.32305
P19784	Casein kinase II subunit alpha'	CSNK2A2	5.68043e+06	9.55604e+06	7.71094e+06	6.23173e+06	6.34363e+06	1.32197e+07	2.45805e+06	5.7112e+06	2.73253e+06	3.20668e+06	1.56352e+06	5.78833e+06	12		22.4376	23.188	22.8785	22.5712	22.5969	23.6562	21.2291	22.4454	21.3818	21.6127	20.5764	22.4647		-0.340764	0.156442	-0.322049	-0.528747	-0.373417	0.524359	-1.05416	-0.222727	-0.948997	-0.840716	-1.35161	0.023131	-0.439938				-0.388995	0.181323	-0.379613	-0.6176
Q92614	Unconventional myosin-XVIIIa	MYO18A	4.23513e+07	4.73833e+07	4.7191e+07	4.56405e+07	2.76338e+07	34734241	811267	3.66198e+07	2.65163e+07	2.66329e+07	984766	3.04457e+07	12		25.3359	25.4979	25.492	25.4438	24.7199	25.0499	19.6298	25.1261	24.6604	24.6667	19.9094	24.8597		2.55757	2.46633	2.29148	2.34387	1.74963	1.91803	-2.65343	2.45803	2.32957	2.21334	-2.01855	2.41815	1.50617				2.91956	2.8586	2.70108	2.73774
O00748	Cocaine esterase	CES2	2.61877e+07	3.73763e+07	3.19482e+07	3.45792e+07	33661600	3.40339e+07	2.34843e+07	2.38023e+07	2.79481e+07	2.60205e+07	1.82334e+07	3.14751e+07	12		24.6424	25.1556	24.9292	25.0434	25.0046	25.0205	24.4852	24.5046	24.7362	24.6331	24.1201	24.9077		1.86405	2.12408	1.72871	1.94345	2.03431	1.88865	2.20195	1.83651	2.40544	2.17978	2.19211	2.46612	2.0721				2.12789	2.46191	2.0377	2.27004
Q9UHB6	LIM domain and actin-binding protein 1	LIMA1	3.2989e+07	7.83018e+07	9.69131e+06	8.66657e+06	3.21726e+06	8.82265e+06	1.09798e+07	1.34583e+07	1.12568e+07	1.41144e+07	5.61516e+06	8.35911e+06	12		24.9755	26.2225	23.2083	23.047	21.6174	23.0728	23.3883	23.682	23.4243	23.7507	22.4209	22.9949		2.19715	3.191	0.00773656	-0.0529172	-1.35289	-0.059041	1.1051	1.01391	1.0935	1.29729	0.492927	0.553334	0.790591				2.50813	3.69852	0.00911943	-0.0618097
Q13177	Serine/threonine-protein kinase PAK 2	PAK2	1.54018e+07	1.50927e+07	2.31979e+07	1.87677e+07	1.45439e+07	1.63384e+07	3.84898e+06	1.33848e+07	3.07322e+06	4.61449e+06	1.67501e+06	3.68048e+06	12		23.8766	23.8473	24.4675	24.1617	23.7939	23.9618	21.876	23.6741	21.5513	22.1377	20.6757	21.8115		1.09827	0.815803	1.26696	1.0618	0.823615	0.829941	-0.4072	1.00601	-0.779485	-0.315628	-1.25224	-0.630121	0.293144				1.25371	0.945555	1.49343	1.24023
Q09161	Nuclear cap-binding protein subunit 1	NCBP1	5.44674e+07	2.18569e+07	1.46916e+07	1.76234e+07	5.23325e+07	1.53684e+07	9.88275e+06	3.64567e+07	3.68655e+07	3.79966e+07	1.51599e+07	4.26623e+07	12		25.6989	24.3816	23.8085	24.071	25.6412	23.8735	23.2365	25.1197	25.1358	25.1794	23.8538	25.3465		2.92056	1.35004	0.607966	0.971045	2.67091	0.741639	0.953237	2.45159	2.80497	2.726	1.92579	2.90487	1.91905				3.33392	1.56477	0.716637	1.13423
Q9BZE4	Nucleolar GTP-binding protein 1	GTPBP4	1.62813e+07	1.90297e+07	1.38091e+07	2.99647e+07	2.33084e+07	2.82498e+07	1.05822e+07	7.43479e+06	1.53615e+07	1.13905e+07	7.16471e+06	8.65241e+06	12		23.9567	24.1818	23.7191	24.8368	24.4743	24.7517	23.3351	22.8259	23.8728	23.4413	22.7725	23.0447		1.17838	1.15021	0.518589	1.73681	1.50405	1.61992	1.05189	0.157771	1.54201	0.98796	0.844508	0.603086	1.0746				1.34516	1.33315	0.611284	2.02868
Q9UMR2	ATP-dependent RNA helicase DDX19B	DDX19B	1.4792e+06	417673	768966	1.04272e+06	288753	868736	512807	881893	964142	1.20936e+06	448811		11		20.4964	18.672	19.5526	19.9919	18.1395	19.7286	18.9681	19.7502	19.8789	20.2058	18.7757			-2.28194	-4.35953	-3.64796	-3.10803	-4.83082	-3.40326	-3.31519	-2.91784	-2.45192	-2.24755	-3.15222		-3.24693				-2.60492	-5.0529	-4.30002	-3.63032
O14818	Proteasome subunit alpha type-7	PSMA7	7.54522e+07	7.6861e+07	6.0648e+07	8.02011e+07	8.36601e+07	8.88917e+07	4.75837e+07	7.37963e+07	3.28627e+07	3.44934e+07	2.33286e+07	2.1589e+07	12		26.1691	26.1957	25.854	26.2571	26.318	26.4055	25.504	26.137	24.9699	25.0398	24.4756	24.3638		3.39073	3.16421	2.65343	3.15717	3.34774	3.27372	3.22072	3.46896	2.63915	2.58645	2.54763	1.92221	2.94768				3.87064	3.66747	3.12772	3.68772
Q8IWA0	WD repeat-containing protein 75	WDR75	7.70565e+06	4.78363e+06	4.83951e+06	4.85329e+06	1.48593e+07	4.13551e+06	3.67151e+06	2.31103e+07	1.49027e+07	1.24689e+07	2.53274e+06	3.66478e+06	12		22.8775	22.1897	22.2064	22.2105	23.8249	21.9796	21.8079	24.462	23.8291	23.5718	21.2723	21.8053		0.0991537	-0.841867	-0.994094	-0.889415	0.854569	-1.15219	-0.475304	1.79394	1.49826	1.11847	-0.655702	-0.636288	-0.0233715				0.113188	-0.975763	-1.17178	-1.03888
P06396	Gelsolin	GSN	2.59614e+07	2.95814e+07	4.34904e+07	4.23643e+07	39789364	5.65468e+07	3.12559e+07	3.94786e+07	3.33474e+07	3.96257e+07	25386828	4.93997e+07	12		24.6299	24.8182	25.3742	25.3363	25.2459	25.7529	24.8976	25.2346	24.9911	25.2399	24.5976	25.558		1.85153	1.78665	2.17367	2.2364	2.27559	2.62112	2.61438	2.56648	2.66027	2.78657	2.66961	3.11642	2.44656				2.11359	2.07081	2.5622	2.61221
Q9UGI8	Testin	TES	7.10246e+06	5.61058e+06	3.87593e+07	2.80802e+07	7.94477e+06	3.01015e+07	1.37333e+07	7.32151e+06	6.57543e+06	4.32932e+06	6.79036e+06	5668781	12		22.7599	22.4197	25.208	24.7431	22.9216	24.8433	23.7112	22.8037	22.6487	22.0457	22.6951	22.4346		-0.018444	-0.61182	2.00751	1.6431	-0.0487199	1.71151	1.42793	0.135621	0.317851	-0.407658	0.767088	-0.00697716	0.576417				-0.0210546	-0.709129	2.36635	1.91922
P09622	Dihydrolipoyl dehydrogenase, mitochondrial	DLD	4.7884e+07	6.25829e+07	6.5539e+07	6.37385e+07	48731505	6.88419e+07	2.9809e+07	5.03583e+07	35688805	3.84587e+07	2.53649e+07	2.00674e+07	12		25.513	25.8993	25.9659	25.9257	25.5384	26.0368	24.8292	25.5857	25.089	25.1968	24.5963	24.2583		2.73471	2.86772	2.76533	2.82572	2.56806	2.90496	2.546	2.91764	2.75817	2.74344	2.66836	1.81676	2.67641				3.12177	3.32383	3.25961	3.30057
P24539	ATP synthase F(0) complex subunit B1, mitochondrial	ATP5PB	8.96587e+07	9.67096e+07	9.36513e+07	8.35377e+07	1.00993e+08	7.67402e+07	5.1105e+07	71723005	62101916	3.96727e+07	4.82993e+07	5.11452e+07	12		26.4179	26.5272	26.4808	26.3159	26.5897	26.1935	25.607	26.0959	25.8881	25.2416	25.5255	25.6081		3.63961	3.49562	3.28027	3.21598	3.61939	3.06166	3.32372	3.42784	3.55733	2.78828	3.59753	3.16651	3.34781				4.15475	4.05158	3.86661	3.75641
Q13347	Eukaryotic translation initiation factor 3 subunit I	EIF3I	4.73904e+07	8.80656e+07	8.24227e+07	6.51366e+07	6.81804e+07	7.04406e+07	4.66948e+07	4.05528e+07	3.14394e+07	3.44987e+07	5.72728e+07	2.27957e+07	12		25.4981	26.3921	26.2965	25.957	26.0229	26.0699	25.4768	25.2733	24.9061	25.04	25.7713	24.4423		2.71976	3.36054	3.09602	2.85702	3.05256	2.93808	3.19351	2.60521	2.57527	2.58667	3.84338	2.00068	2.90239				3.10471	3.89502	3.64941	3.33713
Q9P0L0	Vesicle-associated membrane protein-associated protein A	VAPA	2.24943e+07	2.77188e+07	3.44448e+07	2.55253e+07	3.14301e+07	2.27235e+07	1.49094e+07	4.42378e+07	1.68022e+07	4.03526e+07	1.75464e+07	1.57649e+07	12		24.4231	24.7244	25.0378	24.6054	24.9056	24.4377	23.8297	25.3988	24.0021	25.2662	24.0647	23.9102		1.64473	1.69282	1.83726	1.50548	1.93535	1.30586	1.54648	2.73069	1.67135	2.81279	2.13671	1.46863	1.85734				1.87752	1.96206	2.16566	1.75847
Q8NBQ5	Estradiol 17-beta-dehydrogenase 11	HSD17B11	5.88547e+07	65657497	8.34839e+07	6.72249e+07	7.37783e+07	9.53914e+07	2.90622e+07	7.22151e+07	2.48838e+07	3.09104e+07	2.9613e+07	6.42103e+07	12		25.8107	25.9685	26.315	26.0025	26.1367	26.5074	24.7926	26.1058	24.5687	24.8816	24.8197	25.9363		3.03232	2.93692	3.11447	2.90254	3.1664	3.37553	2.5094	3.43771	2.2379	2.42822	2.89176	3.49472	2.96066				3.46151	3.40403	3.67117	3.39031
Q9P265	Disco-interacting protein 2 homolog B	DIP2B	733332	1.18082e+07	9.8161e+06	9.54074e+06	7.75822e+06	8.69671e+06	282224	1.88046e+06	483616		219821	3.73042e+06	11		19.4841	23.4933	23.2267	23.1857	22.8873	23.052	18.1065	20.8427	18.8835		17.746	21.8309		-3.29423	0.46174	0.0261952	0.085722	-0.0830005	-0.0797831	-4.17676	-1.82544	-3.4473		-4.182	-0.610678	-1.55687				-3.76048	0.535179	0.0308774	0.100127
Q15061	WD repeat-containing protein 43	WDR43	1.50811e+07	1.47904e+07	1.23071e+07	1.33556e+07	5.72339e+06	1.04567e+07	4.61371e+06	1.14129e+07	8.32219e+06	9.02072e+06	5.25325e+06	9.07124e+06	12		23.8462	23.8182	23.553	23.6709	22.4484	23.3179	22.1375	23.4442	22.9885	23.1048	22.3248	23.1129		1.0679	0.786621	0.352461	0.570997	-0.521855	0.186104	-0.145749	0.776076	0.657729	0.651444	0.39681	0.671285	0.454152				1.21905	0.911731	0.415462	0.666951
P07954	Fumarate hydratase, mitochondrial	FH	3.15557e+07	3.48953e+07	3.95244e+07	3.58318e+07	4.49422e+07	3.93959e+07	2.60029e+07	3.09797e+07	2.63403e+07	2.59393e+07	1.18661e+07	1.48668e+07	12		24.9114	25.0565	25.2362	25.0947	25.4216	25.2315	24.6322	24.8848	24.6508	24.6286	23.5003	23.8256		2.13307	2.02499	2.03572	1.99479	2.45127	2.09972	2.34892	2.21673	2.31996	2.17527	1.57237	1.38401	2.06307				2.43497	2.34706	2.39959	2.33
P78406	mRNA export factor	RAE1	2.10772e+07	7.55452e+07	7.72595e+07	6.59108e+07	6.67057e+07	6.38844e+07	1.51356e+07	1.78852e+07	9.64553e+06	1.03432e+07	8.94242e+06	7.43171e+06	12		24.3292	26.1708	26.2032	25.974	25.9913	25.929	23.8514	24.0923	23.2014	23.3022	23.0922	22.8253		1.55085	3.1393	3.00269	2.87407	3.02101	2.79714	1.5682	1.42417	0.870627	0.848812	1.16427	0.383679	1.88707				1.77035	3.63859	3.5394	3.35704
Q9Y6Y8	SEC23-interacting protein	SEC23IP	1.62622e+07	1.93221e+07	2.38799e+07	3.03864e+07	2.94655e+07	2.52558e+07	1.49937e+07	1.94712e+07	20915483	2.55655e+07	1.10888e+07	3.31943e+07	12		23.955	24.2037	24.5093	24.8569	24.8125	24.5901	23.8379	24.2148	24.3181	24.6077	23.4026	24.9844		1.17669	1.17221	1.30877	1.75697	1.84223	1.45829	1.55461	1.54675	1.98727	2.15433	1.47464	2.54285	1.66463				1.34323	1.35865	1.54271	2.05223
Q9NVE7	Pantothenate kinase 4	PANK4	3.2807e+07	2.72949e+07	3.7349e+07	4.62828e+07	4.36966e+07	3.38567e+07	2.32007e+06	3.40199e+07	1.97038e+07	2.57022e+07	3.02214e+06	1.51128e+07	12		24.9675	24.7021	25.1546	25.464	25.381	25.0129	21.1457	25.0199	24.232	24.6154	21.5271	23.8493		2.18917	1.67059	1.95404	2.36402	2.41072	1.88112	-1.13751	2.35179	1.90117	2.16202	-0.400832	1.40769	1.56283				2.49902	1.93629	2.30332	2.76129
Q02878	60S ribosomal protein L6	RPL6	1.17965e+08	1.76267e+08	1.63939e+08	1.57314e+08	1.81783e+08	1.35615e+08	8.19542e+07	1.05005e+08	9.3923e+07	9.77709e+07	6.5668e+07	7.64545e+07	12		26.8138	27.3932	27.2886	27.2291	27.4376	27.0149	26.2883	26.6459	26.485	26.5429	25.9687	26.1881		4.03545	4.36165	4.08806	4.12912	4.46735	3.88313	4.00507	3.97779	4.15417	4.08954	4.04072	3.74651	4.08155				4.60662	5.05535	4.81879	4.823
Q9HCU5	Prolactin regulatory element-binding protein	PREB	6.86594e+07	8.17718e+07	8.93697e+07	6.39564e+07	6.90778e+07	8.28104e+07	1.58046e+07	6.73282e+07	1.78805e+07	1.84474e+07	1.64686e+07	6.60602e+07	12		26.033	26.2851	26.4133	25.9306	26.0417	26.3033	23.9138	26.0047	24.0919	24.1369	23.9732	25.9773		3.25462	3.25356	3.21276	2.83064	3.07142	3.17149	1.6306	3.33662	1.76108	1.68354	2.04525	3.53569	2.73227				3.71527	3.77103	3.78702	3.30632
Q7Z4S6	Kinesin-like protein KIF21A	KIF21A	8517528	9.17033e+06	1.56696e+07	9.80385e+06	1.06526e+07	5892099	2.10958e+07	6.81686e+06	1.90215e+07	2.10536e+07	1.50141e+07	1.77412e+07	12		23.022	23.1285	23.9015	23.2249	23.3447	22.4904	24.3305	22.7007	24.1811	24.3276	23.8398	24.0806		0.243671	0.0970026	0.700943	0.124969	0.374404	-0.641471	2.04721	0.0325872	1.85032	1.8742	1.91185	1.63901	0.854558				0.27816	0.112431	0.826233	0.14597
Q14684	Ribosomal RNA processing protein 1 homolog B	RRP1B	7.38877e+06	1.14981e+07	1.17093e+07	1.27459e+07	1.0137e+07	2.01461e+07	3.7568e+06	8.11956e+06	4.62185e+06	4.7621e+06	3.96596e+06	6.9126e+06	12		22.8169	23.4549	23.4812	23.6035	23.2731	24.264	21.8411	22.953	22.14	22.1832	21.9192	22.7208		0.0385711	0.423354	0.280627	0.503578	0.302827	1.13218	-0.442172	0.284881	-0.190763	-0.2702	-0.00873031	0.279213	0.194447				0.0440303	0.490688	0.330787	0.588202
Q14669	E3 ubiquitin-protein ligase TRIP12	TRIP12	9.96927e+06	1.53419e+07	14777554	1.71247e+07	1.26779e+07	1.10812e+07	1.07029e+06	8.07779e+06	9.76129e+06	1.07099e+07	920332	1.0467e+07	12		23.2491	23.871	23.8169	24.0296	23.5958	23.4016	20.0296	22.9455	23.2186	23.3524	19.8118	23.3193		0.470724	0.839438	0.616381	0.929624	0.625519	0.269795	-2.25367	0.27744	0.887838	0.899077	-2.11617	0.877757	0.193646				0.53735	0.972948	0.726555	1.08584
O00203	AP-3 complex subunit beta-1	AP3B1	2.69208e+07	8.29795e+06	1.18351e+07	9.33713e+06	8.06066e+06	6.50803e+06	9.1791e+07	8.69294e+07	7.10694e+07	6.38414e+07	97360420	5.10664e+07	12		24.6822	22.9843	23.4966	23.1545	22.9425	22.6338	26.4518	26.3733	26.0827	25.928	26.5368	25.6059		1.90389	-0.0472163	0.296046	0.0545996	-0.027828	-0.498031	4.1686	3.70525	3.75192	3.47462	4.60886	3.16429	2.04625				2.17336	-0.0547259	0.348963	0.0637748
P12004	Proliferating cell nuclear antigen	PCNA	9.13511e+07	1.20151e+08	9.0614e+07	8.3627e+07	6.00945e+07	9.08012e+07	57914376	7.50401e+07	2.92374e+07	3.50772e+07	2.42558e+07	1.96438e+07	12		26.4449	26.8403	26.4332	26.3175	25.8407	26.4362	25.7874	26.1612	24.8013	25.064	24.5318	24.2276		3.66659	3.80873	3.23271	3.21752	2.87043	3.30439	3.50417	3.49307	2.47051	2.61066	2.60386	1.78599	3.04739				4.18555	4.4145	3.81054	3.75821
Q6IBS0	Twinfilin-2	TWF2	1.97098e+07	1.77282e+07	1.44649e+07	1.76815e+07	2.04538e+07	1.84358e+07	1.41175e+07	1.7986e+07	1.15444e+07	1.14289e+07	8.51023e+06	1.50474e+07	12		24.2324	24.0795	23.7861	24.0757	24.2859	24.136	23.751	24.1004	23.4607	23.4462	23.0208	23.843		1.45408	1.04801	0.585527	0.97579	1.31557	1.00418	1.46773	1.43228	1.12989	0.992822	1.0928	1.40142	1.15834				1.65989	1.21469	0.690187	1.13977
Q8N1G4	Leucine-rich repeat-containing protein 47	LRRC47	2.42626e+07	4.26677e+07	5.23597e+07	4.84078e+07	2.68376e+07	5.09931e+07	2.13173e+07	2.22862e+07	2.01457e+07	1.93986e+07	2.1641e+07	1.49192e+07	12		24.5322	25.3466	25.642	25.5287	24.6778	25.6038	24.3455	24.4096	24.264	24.2094	24.3673	23.8307		1.7539	2.3151	2.44143	2.42879	1.70746	2.47198	2.06228	1.74156	1.93316	1.75608	2.4393	1.38909	2.03668				2.00214	2.68331	2.87782	2.83694
Q08379	Golgin subfamily A member 2	GOLGA2	9.44721e+06	7.76461e+06	8.75383e+06	5.77014e+06	8.83244e+06	1.21237e+07	4.27996e+06	7.78261e+06	5.06625e+06	6.19811e+06	6.69434e+06	6.90182e+06	12		23.1715	22.8885	23.0615	22.4602	23.0744	23.5313	22.0292	22.8918	22.2725	22.5634	22.6745	22.7185		0.393125	-0.143057	-0.13904	-0.639772	0.104087	0.399505	-0.25408	0.223733	-0.0583143	0.110031	0.746541	0.27696	0.0849766				0.448767	-0.16581	-0.163893	-0.747283
P11172	Uridine 5'-monophosphate synthase	UMPS	2.79607e+07	51091783	5.60127e+07	55233158	6.03748e+07	4.77552e+07	2.09333e+07	2.46e+07	1.53896e+07	12666721	1.48892e+07	1.59587e+07	12		24.7369	25.6066	25.7393	25.719	25.8474	25.5092	24.3193	24.5522	23.8755	23.5945	23.8278	23.9278		1.95856	2.57505	2.53873	2.61908	2.87715	2.37733	2.03605	1.88407	1.54465	1.14117	1.89979	1.48625	2.07816				2.23577	2.9846	2.99251	3.05921
Q96EY1	DnaJ homolog subfamily A member 3, mitochondrial	DNAJA3	1.89904e+07	2.43639e+07	2.7057e+07	3.02644e+07	2.78043e+07	3.03155e+07	1.7266e+07	1.85001e+07	2.29688e+07	2.23261e+07	1.89591e+07	2.08112e+07	12		24.1788	24.5382	24.6895	24.8511	24.7288	24.8536	24.0414	24.141	24.4532	24.4122	24.1764	24.3109		1.40044	1.5067	1.48897	1.75117	1.75851	1.72173	1.75818	1.47294	2.12237	1.95886	2.24842	1.86927	1.7548				1.59865	1.74634	1.75512	2.04545
P28288	ATP-binding cassette sub-family D member 3	ABCD3	4.44458e+07	3.61409e+07	4.48973e+07	3.59065e+07	8.32119e+07	4.68434e+07	2.93988e+07	4.21898e+07	1.77512e+07	1.36847e+07	9.9307e+06	1.46701e+07	12		25.4055	25.1071	25.4201	25.0977	26.3103	25.4813	24.8093	25.3304	24.0814	23.7061	23.2435	23.8064		2.62721	2.07559	2.2196	1.9978	3.33999	2.34952	2.52601	2.6623	1.75061	1.25269	1.31549	1.3648	2.12347				2.99906	2.40571	2.61634	2.33352
P20042	Eukaryotic translation initiation factor 2 subunit 2	EIF2S2	3.99682e+07	4.85556e+07	3.20653e+07	4.32233e+07	2.84425e+07	3.99657e+07	1.8827e+07	3.26855e+07	2.7288e+07	3.91787e+07	2.26734e+07	4.35107e+07	12		25.2523	25.5331	24.9345	25.3653	24.7615	25.2523	24.1663	24.9621	24.7018	25.2236	24.4345	25.3749		2.47402	2.5016	1.73399	2.26536	1.79125	2.12044	1.88305	2.29406	2.37096	2.7702	2.50653	2.93328	2.30373				2.82418	2.89947	2.04393	2.64604
P15531	Nucleoside diphosphate kinase A	NME1	3.53604e+08	4.64795e+08	3.76863e+08	4.14401e+08	4.44002e+08	354992644	2.41208e+08	2.94291e+08	1.95334e+08	1.89081e+08	7.50479e+07	1.08697e+08	12		28.3976	28.792	28.4895	28.6265	28.726	28.4032	27.8457	28.1327	27.5414	27.4944	26.1613	26.6957		5.61923	5.76048	5.28894	5.5265	5.7557	5.27139	5.56246	5.46458	5.21056	5.04106	4.23334	4.25415	5.24903				6.41456	6.67667	6.23431	6.45521
Q14165	Malectin	MLEC	2.60639e+07	3.62909e+07	2.88375e+07	2.81059e+07	2.27086e+07	3.15236e+07	3.54438e+07	2.36385e+07	1.47809e+07	2.48494e+07	3.23125e+07	2.00656e+07	12		24.6355	25.1131	24.7814	24.7444	24.4367	24.9099	25.079	24.4946	23.8172	24.5667	24.9456	24.2582		1.85722	2.08156	1.58092	1.64442	1.46644	1.77811	2.79579	1.82655	1.48643	2.11334	3.01762	1.81664	1.95542				2.12008	2.41263	1.8635	1.92076
Q8TEX9	Importin-4	IPO4	1.59337e+07	1.02188e+07	8.77894e+06	8.71923e+06	2.46517e+07	8.44725e+06	4.46173e+06	1.88217e+07	3.23572e+07	3.22122e+07	4.53373e+06	2.71334e+07	12		23.9256	23.2847	23.0656	23.0558	24.5552	23.0101	22.0892	24.1659	24.9476	24.9411	22.1123	24.6936		1.14724	0.25319	-0.134908	-0.044179	1.58489	-0.121771	-0.194072	1.4978	2.61678	2.48774	0.184298	2.25198	0.960749				1.30962	0.293459	-0.159022	-0.0516031
O60218	Aldo-keto reductase family 1 member B10	AKR1B10	7.81709e+07	81495801	1.05873e+08	1.60828e+08	70965130	1.10867e+08	2.39619e+07	5.89466e+07	21841508	2.45781e+07	1.21335e+07	2.31802e+07	12		26.2201	26.2802	26.6578	27.2609	26.0806	26.7243	24.5142	25.8129	24.3806	24.5509	23.5325	24.4664		3.4418	3.24868	3.45724	4.161	3.11031	3.59243	2.23099	3.14482	2.04977	2.0975	1.60452	2.02481	2.84699				3.92894	3.76538	4.0752	4.86024
Q9Y4P3	Transducin beta-like protein 2	TBL2	1.43597e+07	1.67952e+07	2.11565e+07	1.94741e+07	1.70985e+07	1.83487e+07	1.09268e+07	4.94353e+07	5.08942e+07	5.13926e+07	9.22308e+06	5.7032e+07	12		23.7755	24.0015	24.3346	24.2151	24.0274	24.1292	23.3814	25.559	25.601	25.6151	23.1368	25.7653		0.997191	0.970004	1.13407	1.11511	1.05707	0.99735	1.09812	2.89095	3.2702	3.16169	1.20885	3.32368	1.76869				1.13833	1.12428	1.33678	1.3025
Q9BYT8	Neurolysin, mitochondrial	NLN	2.56309e+07	3.92648e+07	4.77942e+07	4.07601e+07	3.19728e+07	3.62779e+07	2.37585e+07	2.55465e+07	2.00655e+07	2.03744e+07	1.38821e+07	1.60943e+07	12		24.6114	25.2267	25.5103	25.2807	24.9303	25.1126	24.5019	24.6066	24.2582	24.2803	23.7267	23.94		1.83305	2.19519	2.30981	2.18071	1.96005	1.98077	2.21869	1.93853	1.92741	1.82688	1.79875	1.49846	1.97236				2.09249	2.54433	2.72267	2.54717
Q14692	Ribosome biogenesis protein BMS1 homolog	BMS1	4.14947e+07	4.30142e+07	8.15694e+07	4.67662e+07	9.62479e+06	5.53436e+07	4.12963e+06	3.57603e+07	1.97662e+07	2.66329e+07	3.89882e+06	1.81243e+07	12		25.3064	25.3583	26.2815	25.479	23.1983	25.7219	21.9776	25.0919	24.2365	24.6667	21.8946	24.1114		2.52809	2.32677	3.081	2.37902	0.228029	2.59009	-0.305662	2.42377	1.90573	2.21334	-0.0333622	1.66983	1.75055				2.88591	2.69684	3.63172	2.7788
P25205	DNA replication licensing factor MCM3	MCM3	1.30254e+07	1.46748e+07	2.21989e+07	1.34587e+07	1.64559e+07	1.69843e+07	6.88877e+06	100471727	1.0497e+08	1.58889e+08	4.93533e+06	1.75499e+08	12		23.6348	23.8068	24.404	23.682	23.9721	24.0177	22.7158	26.5822	26.6454	27.2434	22.2347	27.3869		0.856489	0.7753	1.20346	0.582084	1.00181	0.885881	0.432571	3.91413	4.3146	4.79008	0.306747	4.9453	2.0007				0.977714	0.898609	1.41857	0.679901
P01031	Complement C5	C5	13442564	1.8228e+07	6.16638e+06	5.61914e+06	2.40308e+07	4.807e+06	416969	1.38124e+07	2.14895e+07	2.05673e+07	702535	5.82019e+06	12		23.6803	24.1196	22.556	22.4219	24.5184	22.1967	18.6696	23.7195	24.3571	24.2939	19.4222	22.4726		0.901973	1.08811	-0.644532	-0.678031	1.54809	-0.935117	-3.61367	1.05137	2.02633	1.84049	-2.50576	0.0310508	0.00919185				1.02964	1.26117	-0.759738	-0.791971
O60343	TBC1 domain family member 4	TBC1D4	2.51649e+06	4.20752e+06	1.08885e+07	3.24723e+06		3.88925e+06	2.74774e+06	1.89177e+06	4.54492e+06	3.6421e+06	1.18046e+06	4.87864e+06	11		21.263	22.0045	23.3763	21.6308		21.8911	21.3898	20.8513	22.1158	21.7963	20.1709	22.218		-1.51535	-1.027	0.175776	-1.46917		-1.24076	-0.893429	-1.81679	-0.214979	-0.657028	-1.75705	-0.223536	-0.96721				-1.72983	-1.19034	0.207195	-1.71606
O95782	AP-2 complex subunit alpha-1	AP2A1	4.49149e+07	2.90803e+07	2.6372e+07	4.80777e+07	2.17019e+07	3.84437e+07	1.42939e+07	5.81888e+07	4.22364e+07	4.70887e+07	1.00527e+07	6.34179e+07	12		25.4207	24.7935	24.6525	25.5189	24.3713	25.1962	23.7689	25.7942	25.332	25.4889	23.2611	25.9184		2.64236	1.762	1.45198	2.41892	1.40102	2.06442	1.48565	3.12615	3.00118	3.03551	1.33311	3.4768	2.26659				3.01635	2.04224	1.71152	2.82541
P00450	Ceruloplasmin	CP	5.43665e+07	6.40434e+06	1.04382e+07	6.1317e+06	8.02264e+06	1.00343e+07	4.94871e+07	5.16799e+07	5.0612e+07	5.44127e+07	3.84288e+07	6.80122e+07	12		25.6962	22.6106	23.3154	22.5479	22.9356	23.2584	25.5605	25.6231	25.593	25.6974	25.1957	26.0193		2.91788	-0.420921	0.11485	-0.552093	-0.0346478	0.126619	3.2773	2.95501	3.26217	3.24407	3.26771	3.5777	1.81131				3.33087	-0.487867	0.135378	-0.64487
Q05682	Caldesmon	CALD1	1.41435e+07	1.79142e+07	2.83517e+07	2.4563e+07	2.98195e+07	2.68776e+07	7.493e+06	1.31405e+07	1450674	669924	5.17253e+06	4.48768e+06	12		23.7536	24.0946	24.7569	24.55	24.8298	24.6799	22.8371	23.6475	20.4683	19.3536	22.3024	22.0975		0.975301	1.06306	1.55641	1.45004	1.85946	1.54808	0.553867	0.979433	-1.86251	-3.09973	0.374469	-0.344047	0.421152				1.11334	1.23214	1.83461	1.69371
Q9BVP2	Guanine nucleotide-binding protein-like 3	GNL3	7.98166e+06	1.37404e+08	2.24162e+08	1.83641e+08	2.9643e+08	3.00398e+08	4.52632e+06	7.1374e+06	4.83942e+06	6.62912e+06	5.0075e+06	1.52695e+07	12		22.9283	27.0339	27.74	27.4523	28.1431	28.1623	22.1099	22.767	22.2064	22.6604	22.2557	23.8641		0.149924	4.00231	4.53944	4.35237	5.17282	5.03048	-0.173337	0.0988772	-0.1244	0.207019	0.32769	1.42256	2.08381				0.171144	4.63887	5.35085	5.08377
P31327	Carbamoyl-phosphate synthase [ammonia], mitochondrial	CPS1	12992537	1.58297e+07	1.75393e+07	1.71443e+07	1.6139e+07	1.71676e+07	6.94864e+06	1.39812e+07	9.24582e+06	1.31684e+07	8.53997e+06	1.15998e+07	12		23.6312	23.9161	24.0641	24.0312	23.944	24.0332	22.7283	23.737	23.1404	23.6506	23.0258	23.4676		0.852847	0.884594	0.863565	0.93128	0.973756	0.901361	0.445055	1.0689	0.809568	1.19721	1.09783	1.02602	0.920998				0.973557	1.02529	1.01792	1.08778
P26641	Elongation factor 1-gamma	EEF1G	1.96371e+08	2.24421e+08	2.47486e+08	2.60062e+08	2.54137e+08	2.47687e+08	1.07266e+08	1.51715e+08	1.14864e+08	1.12599e+08	8.022e+07	1.18809e+08	12		27.549	27.7416	27.8828	27.9543	27.921	27.8839	26.6766	27.1768	26.7754	26.7466	26.2575	26.8241		4.77068	4.71009	4.68225	4.85433	4.95074	4.75212	4.39337	4.5087	4.44455	4.29326	4.32949	4.38248	4.58934				5.44591	5.45922	5.51917	5.67009
O60271	C-Jun-amino-terminal kinase-interacting protein 4	SPAG9	7.14267e+06	7.61135e+06	1.21265e+07	3.96027e+06	1.03125e+07	1.62282e+06	1.24062e+07	5.15751e+06	2.38721e+06	2.8315e+06	9.04412e+06	4.12425e+06	12		22.768	22.8597	23.5317	21.9172	23.2979	20.6301	23.5646	22.2982	21.1869	21.4331	23.1085	21.9757		-0.0102995	-0.171819	0.33114	-1.18278	0.327593	-2.50175	1.28131	-0.369845	-1.14391	-1.02023	1.18058	-0.465882	-0.312157				-0.0117573	-0.199146	0.390329	-1.38154
Q12907	Vesicular integral-membrane protein VIP36	LMAN2	1.18407e+08	1.45873e+08	1.59991e+08	1.43044e+08	1.57298e+08	1.87855e+08	4.05268e+07	1.29576e+08	1.20787e+08	1.37728e+08	4.78942e+07	1.28049e+08	12		26.8192	27.1201	27.2534	27.0919	27.2289	27.485	25.2724	26.9492	26.8479	27.0372	25.5133	26.9321		4.04085	4.0886	4.05289	3.99193	4.25863	4.35322	2.98913	4.28114	4.51709	4.58388	3.58538	4.49054	4.10277				4.61278	4.73888	4.77733	4.66276
P30419	Glycylpeptide N-tetradecanoyltransferase 1	NMT1	1.52237e+07	2.24868e+07	2.45826e+07	2.22004e+07	2.09994e+07	2.30834e+07	1.04199e+07	1.01586e+07	7.24091e+06	7.64592e+06	4.19169e+06	5.40341e+06	12		23.8598	24.4226	24.5511	24.4041	24.3238	24.4604	23.3128	23.2762	22.7877	22.8663	21.9991	22.3654		1.08149	1.39103	1.35061	1.30414	1.35355	1.32853	1.0296	0.608106	0.456938	0.412893	0.0711326	-0.0761453	0.859322				1.23456	1.61227	1.59203	1.52329
P40925	Malate dehydrogenase, cytoplasmic	MDH1	9.64727e+07	111438221	1.39515e+08	1.30618e+08	6.43496e+07	1.14786e+08	6.55547e+07	1.02652e+08	4.09667e+07	4.26189e+07	1.69377e+07	1.85237e+07	12		26.5236	26.7317	27.0558	26.9608	25.9394	26.7744	25.9662	26.6132	25.2879	25.345	24.0137	24.1429		3.74529	3.70013	3.85532	3.86084	2.96913	3.64255	3.68295	3.9451	2.95715	2.89162	2.08576	1.70128	3.25309				4.27538	4.28862	4.54444	4.50963
Q9NSK0	Kinesin light chain 4	KLC4	1.16802e+07	1.19855e+07	1.92148e+07	1.33741e+07	1.42314e+07	1.71164e+07	4.56624e+06	1.16321e+07	8.64766e+06	7.36667e+06	3.19578e+06	8.09537e+06	12		23.4776	23.5148	24.1957	23.6729	23.7626	24.0289	22.1226	23.4716	23.0439	22.8126	21.6077	22.9487		0.699233	0.483243	0.995191	0.572986	0.79228	0.897056	-0.160668	0.803525	0.713076	0.359215	-0.320233	0.507081	0.528499				0.798201	0.560102	1.17308	0.669274
Q9H9B4	Sideroflexin-1	SFXN1	75383571	76222308	9.38263e+07	7.83496e+07	1.1227e+08	1.00325e+08	1.87421e+07	6.88703e+07	6.88358e+07	7.62601e+07	2.81164e+07	6.72492e+07	12		26.1677	26.1837	26.4835	26.2234	26.7424	26.5801	24.1598	26.0374	26.0367	26.1844	24.7449	26.003		3.38941	3.15217	3.28297	3.12348	3.7721	3.44828	1.87653	3.36929	3.70585	3.73106	2.81694	3.56143	3.26913				3.86914	3.65351	3.86978	3.64836
P30041	Peroxiredoxin-6	PRDX6	1.15284e+08	1.6099e+08	1.40525e+08	1.32668e+08	8.96826e+07	163471130	6.82342e+07	8.03231e+07	4.36171e+07	3.98337e+07	1.47513e+07	1.64188e+07	12		26.7806	27.2624	27.0662	26.9832	26.4183	27.2845	26.024	26.2593	25.3784	25.2475	23.8143	23.9688		4.00229	4.23086	3.86572	3.88329	3.44803	4.15264	3.74075	3.59122	3.04759	2.79412	1.88637	1.52726	3.34751				4.56876	4.90376	4.5567	4.53587
Q8NDI1	EH domain-binding protein 1	EHBP1	3.51633e+06	4.1164e+06	5.18592e+06	4.26134e+06	4.53133e+06	8.66851e+06	4.91344e+06	2.79859e+06	3.37015e+06	4.28659e+06	6.42996e+06	3.59093e+06	12		21.7456	21.973	22.3062	22.0229	22.1115	23.0474	22.2283	21.4163	21.6844	22.0314	22.6164	21.7759		-1.03269	-1.05859	-0.894354	-1.07707	-0.85879	-0.0844689	-0.0549432	-1.25182	-0.646421	-0.421967	0.688408	-0.665659	-0.613197				-1.17886	-1.22695	-1.05422	-1.25807
Q12874	Splicing factor 3A subunit 3	SF3A3	3.28011e+07	4.03288e+07	3.24847e+07	4.9706e+07	4.9764e+07	53315532	1.96118e+07	2.98363e+07	2.05845e+07	1.72864e+07	1.18956e+07	1.72846e+07	12		24.9672	25.2653	24.9533	25.5669	25.5686	25.6681	24.2252	24.8306	24.2951	24.0431	23.5039	24.043		2.18891	2.23377	1.75273	2.46697	2.5983	2.53623	1.94197	2.16248	1.96425	1.58977	1.57595	1.6014	2.05106				2.49872	2.58904	2.06602	2.88153
P16403	Histone H1.2	HIST1H1C	7.58031e+08	9.2589e+08	1.44683e+09	1.43269e+09	1.04267e+09	9.39925e+08	4.48001e+08	6.60092e+08	6.66799e+08	7.26347e+08	558667322	7.50799e+08	12		29.4977	29.7863	30.4302	30.4161	29.9576	29.808	28.7389	29.2981	29.3127	29.4361	29.0574	29.4839		6.71935	6.75473	7.22973	7.31613	6.98734	6.67615	6.45568	6.63	6.98187	6.98272	7.12944	7.04227	6.90878				7.67039	7.82905	8.522	8.54557
A3KMH1	von Willebrand factor A domain-containing protein 8	VWA8	2.75473e+07	5.92345e+07	5.22041e+07	5.82597e+07	57387573	7.59182e+07	3.70079e+07	25965931	1.91247e+07	2.06943e+07	2.69154e+07	4.28508e+07	12		24.7154	25.8199	25.6377	25.796	25.7742	26.1779	25.1413	24.6301	24.1889	24.3027	24.6819	25.3528		1.93707	2.78839	2.43714	2.69605	2.80394	3.04612	2.85809	1.96203	1.85813	1.84937	2.75396	2.91123	2.49179				2.21124	3.23188	2.87276	3.14911
Q96GQ7	Probable ATP-dependent RNA helicase DDX27	DDX27	6.31429e+07	6.86654e+06	7.46955e+06	6.41876e+06	6.53217e+07	7.22778e+06	6.60858e+06	7.61745e+07	2.73829e+07	2.5278e+07	4.15052e+06	2.22248e+07	12		25.9121	22.7112	22.8326	22.6139	25.9611	22.7851	22.6559	26.1828	24.7068	24.5914	21.9849	24.4057		3.13379	-0.320387	-0.367933	-0.486085	2.99077	-0.3467	0.372665	3.51472	2.37597	2.13801	0.0568925	1.96408	1.25215				3.57733	-0.371343	-0.4337	-0.567769
Q9BY49	Peroxisomal trans-2-enoyl-CoA reductase	PECR	2.93388e+07	3.56971e+07	3.91029e+07	4.04521e+07	4.97806e+07	3.85844e+07	1.98471e+07	2.91182e+07	3.40542e+07	3.7312e+07	2.62265e+07	6.49136e+07	12		24.8063	25.0893	25.2208	25.2697	25.5691	25.2015	24.2424	24.7954	25.0213	25.1531	24.6445	25.952		2.02797	2.05776	2.02025	2.16976	2.59879	2.06969	1.95918	2.12733	2.69053	2.69977	2.71655	3.51043	2.38733				2.31501	2.38504	2.38136	2.53438
P46379	Large proline-rich protein BAG6	BAG6	4.72621e+07	10707858	1.50214e+07	1.01472e+07	1.47127e+07	1.10173e+07	1.5443e+07	4.1437e+07	3.64308e+07	3.87692e+07	1.79714e+07	3.15189e+07	12		25.4942	23.3522	23.8405	23.2746	23.8106	23.3933	23.8805	25.3044	25.1187	25.2084	24.0992	24.9097		2.71585	0.320627	0.639995	0.174625	0.840269	0.261446	1.59721	2.63633	2.78785	2.75504	2.17123	2.46813	1.61405				3.10024	0.371622	0.75439	0.20397
Q9BZF1	Oxysterol-binding protein-related protein 8	OSBPL8	2.29135e+06	8.33323e+07	6.74367e+07	7.96038e+07	2.30484e+06	1.54047e+06	1.39647e+07	2.17398e+06	5.95367e+06	1.85705e+06	7.1911e+06	6.2265e+06	12		21.1278	26.3124	26.007	26.2463	21.1362	20.5549	23.7353	21.0519	22.5053	20.8246	22.7778	22.57		-1.65056	3.28083	2.80651	3.14639	-1.83406	-2.57688	1.45204	-1.61618	0.174546	-1.62879	0.849811	0.128406	0.211005				-1.88418	3.80264	3.30816	3.67512
Q96CM8	Medium-chain acyl-CoA ligase ACSF2, mitochondrial	ACSF2	3.6424e+07	4.85486e+07	5.85941e+07	4.18959e+07	5.62579e+07	5.08244e+07	2.68415e+07	3.67829e+07	2.46743e+07	3.78925e+07	2.65625e+07	4.21488e+07	12		25.1184	25.5329	25.8043	25.3203	25.7456	25.599	24.678	25.1325	24.5565	25.1754	24.6629	25.329		2.34006	2.50139	2.60373	2.22036	2.77526	2.4672	2.39471	2.46444	2.22571	2.72204	2.73492	2.8874	2.5281				2.67126	2.89922	3.06913	2.59348
Q92973	Transportin-1	TNPO1	7.05092e+06	6.98592e+07	9.33577e+07	8.10652e+07	8.33709e+07	6.82253e+07	9.49015e+06	7.76982e+06	6.96887e+06	8.37342e+06	7.86506e+06	7.00752e+06	12		22.7494	26.0579	26.4763	26.2726	26.313	26.0238	23.178	22.8895	22.7325	22.9974	22.907	22.7405		-0.0289516	3.02641	3.27574	3.17263	3.34275	2.89198	0.894754	0.221361	0.401692	0.544019	0.979056	0.298888	1.58503				-0.0330493	3.50775	3.86127	3.70578
P12081	Histidine--tRNA ligase, cytoplasmic	HARS	3.79654e+07	4.46181e+07	4.71364e+08	4.41963e+07	4.46599e+07	5.15659e+07	1.80175e+07	3.80129e+07	1.94304e+07	1.91336e+07	1.31458e+07	1.25902e+07	12		25.1782	25.4111	28.8123	25.3974	25.4125	25.6199	24.1029	25.18	24.2118	24.1896	23.6481	23.5858		2.39985	2.37958	5.61174	2.29747	2.44218	2.48809	1.81965	2.51189	1.88101	1.73624	1.72013	1.14422	2.36934				2.73952	2.75805	6.61481	2.68355
Q99536	Synaptic vesicle membrane protein VAT-1 homolog	VAT1	2.99516e+07	43442087	8.19071e+07	5.21094e+07	4.19282e+07	7.17362e+07	1.68761e+07	3.27506e+07	2.00038e+07	2.12992e+07	1.39851e+07	1.79834e+07	12		24.8361	25.3726	26.2875	25.635	25.3214	26.0962	24.0085	24.965	24.2538	24.3443	23.7374	24.1002		2.0578	2.34105	3.08696	2.53509	2.35112	2.96438	1.72523	2.29693	1.92297	1.89093	1.80942	1.65858	2.22004				2.34905	2.71339	3.63874	2.96111
O43837	Isocitrate dehydrogenase [NAD] subunit beta, mitochondrial	IDH3B	2.38418e+07	2.72643e+07	2.60721e+07	2.64217e+07	2.96876e+07	3.35732e+07	2.32012e+07	2.72216e+07	2.54466e+07	2.85238e+07	2.75784e+07	2.01442e+07	12		24.507	24.7005	24.636	24.6552	24.8234	25.0008	24.4677	24.6982	24.601	24.7657	24.717	24.2639		1.72866	1.66897	1.43548	1.55527	1.85306	1.86898	2.18445	2.03016	2.27017	2.3123	2.78907	1.82227	1.9599				1.97333	1.93442	1.69206	1.81663
P41091	Eukaryotic translation initiation factor 2 subunit 3	EIF2S3	5.55235e+07	6.64463e+07	61880964	5.8611e+07	6.10788e+07	5.01987e+07	3.23573e+07	4.89953e+07	3.23001e+07	4.04319e+07	2.2871e+07	2.88951e+07	12		25.7266	25.9857	25.883	25.8047	25.8642	25.5811	24.9476	25.5461	24.945	25.269	24.447	24.7843		2.94826	2.95415	2.68247	2.70472	2.89387	2.44932	2.66434	2.87805	2.61423	2.81562	2.51905	2.34274	2.70557				3.36555	3.424	3.16195	3.15924
P18031	Tyrosine-protein phosphatase non-receptor type 1	PTPN1	3.52116e+07	3.53798e+07	4.65626e+07	3.33483e+07	4.40939e+07	4.83835e+07	1.52935e+07	3.84028e+07	2.37101e+07	2.82254e+07	1.12439e+07	26730395	12		25.0695	25.0764	25.4727	24.9911	25.3941	25.528	23.8664	25.1947	24.499	24.7505	23.4226	24.672		2.29121	2.04488	2.27214	1.89116	2.42378	2.39619	1.58317	2.52662	2.16819	2.29712	1.49467	2.23039	2.13496				2.61551	2.37011	2.67828	2.20896
P39748	Flap endonuclease 1	FEN1	2.89748e+07	4.06766e+07	18252147	3.50577e+07	3.93519e+07	3.88715e+07	1.11864e+07	2.85717e+07	2.02502e+07	2.53183e+07	9.7686e+06	2.51034e+07	12		24.7883	25.2777	24.1216	25.0632	25.2299	25.2122	23.4152	24.7681	24.2714	24.5937	23.2197	24.5814		2.00996	2.24616	0.921039	1.96328	2.25964	2.08039	1.132	2.1	1.94063	2.14031	1.29175	2.13979	1.85208				2.29445	2.6034	1.08567	2.2932
Q02818	Nucleobindin-1	NUCB1	5.27267e+07	3.27414e+07	6.28068e+07	6.02706e+07	6.61762e+07	6.40922e+07	2.73445e+07	4.33615e+07	4.03779e+07	4.48585e+07	1.82197e+07	4.02338e+07	12		25.652	24.9646	25.9044	25.845	25.9798	25.9336	24.7047	25.3699	25.2671	25.4189	24.119	25.2619		2.8737	1.93307	2.70389	2.745	3.00951	2.80182	2.4215	2.70182	2.93626	2.96551	2.19102	2.82032	2.67529				3.28043	2.24052	3.1872	3.20629
Q7Z2W4	Zinc finger CCCH-type antiviral protein 1	ZC3HAV1	6.92657e+06	1.31359e+08	135638720	1.46214e+08	5.83745e+06	1.2168e+08	3.53689e+06	1.2845e+07	8.11258e+06	1.01494e+07	3.19349e+06	6.44466e+06	12		22.7237	26.9689	27.0152	27.1235	22.4769	26.8585	21.754	23.6147	22.9517	23.2749	21.6067	22.6197		-0.0546225	3.9374	3.81467	4.02355	-0.493387	3.72669	-0.529195	0.946616	0.620927	0.821531	-0.321267	0.178089	1.38925				-0.0623536	4.56364	4.49652	4.6997
P12235	ADP/ATP translocase 1	SLC25A4	9.95443e+06	1.45539e+07	1.06705e+07	8.66661e+06	4.23011e+06	9178648	2.37846e+07	1.47638e+07	1.12076e+07	1.5081e+07	2.5368e+07	1.18604e+07	12		23.2469	23.7949	23.3471	23.047	22.0123	23.1299	24.5035	23.8156	23.418	23.8462	24.5965	23.4996		0.468576	0.763366	0.146606	-0.0529111	-0.95803	-0.0019711	2.22028	1.14747	1.08717	1.39287	2.66854	1.05806	0.828336				0.534897	0.884778	0.172811	-0.0618026
O94874	E3 UFM1-protein ligase 1	UFL1	1.33605e+07	2.0313e+07	2.47722e+07	2.05853e+07	2.18679e+07	1.81842e+07	6.04858e+06	10727452	1.0167e+07	1.22322e+07	5.80903e+06	9.76282e+06	12		23.6715	24.2759	24.5622	24.2951	24.3823	24.1162	22.5282	23.3548	23.2774	23.5442	22.4699	23.2189		0.893136	1.24436	1.36169	1.19516	1.41202	0.984359	0.244919	0.686715	0.946586	1.09082	0.541897	0.777282	0.948246				1.01955	1.44228	1.60509	1.396
Q9Y2A7	Nck-associated protein 1	NCKAP1	2.03975e+07	1.06022e+07	1.24092e+07	1.10045e+07	2.65731e+07	1.53533e+07	3.03142e+07	1.90611e+07	1.71619e+07	1.68272e+07	3.37205e+07	1.73327e+07	12		24.2819	23.3379	23.5649	23.3916	24.6635	23.872	24.8535	24.1841	24.0327	24.0043	25.0071	24.047		1.50356	0.306315	0.364384	0.291649	1.69317	0.740228	2.57024	1.51604	1.70191	1.55092	3.07916	1.60541	1.41025				1.71637	0.355033	0.429516	0.340659
Q10567	AP-1 complex subunit beta-1	AP1B1	2.17402e+07	3.99678e+07	51428560	2.34506e+07	2.62057e+07	1.6993e+07	1.44955e+07	2.21187e+07	1.83922e+07	20767506	7.35855e+06	1.18317e+07	12		24.3739	25.2523	25.6161	24.4831	24.6434	24.0184	23.7891	24.3988	24.1326	24.3078	22.811	23.4962		1.59553	2.2208	2.41554	1.38317	1.67308	0.886618	1.50586	1.73067	1.80179	1.85446	0.883021	1.05457	1.58376				1.82136	2.57401	2.84731	1.61561
O14841	5-oxoprolinase	OPLAH	7.16359e+06	9.04094e+06	9.1311e+06	8.65649e+06	3.85262e+06	6.48222e+06	4.3817e+06	6.32431e+06	2.36424e+06	3.81198e+06	2.52305e+06	4.84848e+06	12		22.7723	23.108	23.1224	23.0453	21.8774	22.6281	22.0631	22.5925	21.1729	21.8621	21.2667	22.2091		-0.00608053	0.0765019	-0.0781665	-0.0545976	-1.09289	-0.503765	-0.220184	-0.0756121	-1.15786	-0.591257	-0.66123	-0.232482	-0.383135				-0.00694115	0.0886694	-0.0921384	-0.0637725
Q06481	Amyloid-like protein 2	APLP2	16403638	1.55441e+07	1.84169e+07	1.89214e+07	1.68585e+07	1.96452e+07	1.07039e+07	1.91527e+07	1.87687e+07	1.96555e+07	1.35424e+07	2.30793e+07	12		23.9675	23.8899	24.1345	24.1735	24.007	24.2277	23.3516	24.191	24.1618	24.2284	23.691	24.4601		1.18918	0.858324	0.934001	1.07357	1.03668	1.09585	1.06839	1.52296	1.83102	1.77506	1.76301	2.01851	1.34721				1.35749	0.994838	1.10095	1.25397
P11310	Medium-chain specific acyl-CoA dehydrogenase, mitochondrial	ACADM	1.78641e+08	1.92834e+08	1.9512e+08	1.97409e+08	1.73497e+08	1.62436e+08	1.95928e+07	135770003	9.28492e+07	1.05813e+08	2.39113e+07	7.23568e+07	12		27.4125	27.5228	27.5398	27.5566	27.3703	27.2753	24.2238	27.0166	26.4684	26.6569	24.5112	26.1086		4.63416	4.49124	4.33926	4.45666	4.40004	4.14348	1.94058	4.3485	4.13758	4.20358	2.58322	3.66704	3.94545				5.29006	5.20557	5.11489	5.20559
P11177	Pyruvate dehydrogenase E1 component subunit beta, mitochondrial	PDHB	4.3644e+07	5.66184e+07	5.61485e+07	4.33176e+07	5.89436e+07	6.14681e+07	3.26867e+07	35238799	2.76538e+07	3.43776e+07	3.35319e+07	3.04566e+07	12		25.3793	25.7548	25.7427	25.3685	25.8128	25.8733	24.9622	25.0707	24.721	25.035	24.999	24.8603		2.60095	2.72323	2.54222	2.2685	2.84254	2.74151	2.67895	2.40257	2.39017	2.5816	3.07106	2.41867	2.60517				2.96908	3.15635	2.99663	2.64972
P18621	60S ribosomal protein L17	RPL17	127311847	1.93017e+08	1.84962e+08	2.09145e+08	1.53557e+08	1.87138e+08	9.42764e+07	1.02701e+08	1.17502e+08	115112345	8.73994e+07	1.0766e+08	12		26.9238	27.5241	27.4627	27.6399	27.1942	27.4795	26.4904	26.6139	26.8081	26.7785	26.3811	26.6819		4.14546	4.49261	4.26213	4.53998	4.22391	4.3477	4.20715	3.94579	4.47731	4.3251	4.45315	4.24032	4.30505				4.7322	5.20715	5.02397	5.3029
P21589	5'-nucleotidase	NT5E	1.82819e+07	1.42558e+07	1.6746e+07	1.49516e+07	2.57452e+07	1.85339e+07	1.29926e+07	1.86141e+07	1.40163e+07	1.79202e+07	1.07043e+07	2.13431e+07	12		24.1239	23.765	23.9973	23.8338	24.6178	24.1437	23.6312	24.1499	23.7406	24.0951	23.3517	24.3473		1.34558	0.733509	0.796788	0.733852	1.64751	1.01184	1.34795	1.4818	1.4098	1.64172	1.42371	1.90568	1.28998				1.53603	0.850172	0.93921	0.857173
Q9Y6N5	Sulfide:quinone oxidoreductase, mitochondrial	SQOR	1.00333e+07	1.15537e+07	1.77627e+07	1.5922e+07	1.12008e+07	1.18046e+07	1.80665e+08	2.56144e+07	2.3003e+07	2.66346e+07	1.22535e+08	2.39616e+07	12		23.2583	23.4619	24.0824	23.9245	23.4171	23.4928	27.4287	24.6104	24.4553	24.6668	26.8686	24.5142		0.479961	0.430317	0.881827	0.82457	0.446808	0.361026	5.1455	1.94236	2.12451	2.21343	4.94065	2.07264	1.82197				0.547893	0.498758	1.03945	0.963136
Q9UL12	Sarcosine dehydrogenase, mitochondrial	SARDH	41513321	1.16641e+07	1.75571e+07	13735363	5.00105e+07	1.48576e+07	6.00517e+06	3.22284e+07	3.2285e+07	4.04331e+07	8.28353e+06	4.30631e+07	12		25.3071	23.4756	24.0655	23.7114	25.5757	23.8247	22.5178	24.9418	24.9444	25.269	22.9818	25.3599		2.52874	0.444033	0.865026	0.611444	2.60543	0.692881	0.234529	2.27374	2.61356	2.81567	1.05385	2.91836	1.63811				2.88665	0.514655	1.01964	0.714195
Q13895	Bystin	BYSL	4.47608e+06	4.67603e+06	3.82997e+06	4.69681e+06	1.89486e+06	1.485e+07	3.08877e+06	3.05462e+06	3.34209e+06	2.49348e+06	1.73842e+06	2.87425e+06	12		22.0938	22.1569	21.8689	22.1632	20.8537	23.824	21.5586	21.5426	21.6723	21.2497	20.7293	21.4548		-0.684526	-0.874685	-1.33162	-0.936698	-2.11664	0.692136	-0.724642	-1.12553	-0.658484	-1.20363	-1.19863	-0.986832	-0.929148				-0.781412	-1.0138	-1.56964	-1.09411
P12277	Creatine kinase B-type	CKB	2.04208e+07	1.51535e+07	1.80803e+07	1.71412e+07	3.41952e+06	2.08091e+07	9.54483e+07	2.91105e+07	1.54255e+07	1.95769e+07	4.68995e+07	1.77963e+07	12		24.2835	23.8532	24.1079	24.031	21.7054	24.3107	26.5082	24.795	23.8788	24.2226	25.4831	24.0851		1.50521	0.821613	0.907393	0.931015	-1.26493	1.17889	4.22497	2.12695	1.54801	1.76928	3.5551	1.64349	1.57892				1.71825	0.952288	1.06958	1.08747
O43747	AP-1 complex subunit gamma-1	AP1G1	7.37732e+06	8.05127e+06	9.70064e+06	7.40796e+06	5.46631e+06	8.18434e+06	6.31058e+06	5.63226e+06	4.95943e+06	3.02581e+06	4.7455e+06	4.64572e+06	12		22.8147	22.9408	23.2096	22.8206	22.3821	22.9644	22.5893	22.4253	22.2417	21.5289	22.1781	22.1475		0.0363331	-0.0907543	0.0091256	-0.279303	-0.588158	-0.167387	0.306096	-0.242808	-0.089059	-0.924477	0.25016	-0.294114	-0.172862				0.0414756	-0.105189	0.0107568	-0.326239
P34931	Heat shock 70 kDa protein 1-like	HSPA1L	1.73757e+08	5.01006e+06	7.57875e+06	7.5525e+06	2.26302e+08	8.04545e+06	233505	1.61297e+08	1.82153e+08	1.60534e+08		1.32239e+08	11		27.3725	22.2564	22.8535	22.8485	27.7537	22.9397	17.8331	27.2651	27.4406	27.2583		26.9786		4.59416	-0.775143	-0.346995	-0.251425	4.78338	-0.19208	-4.45015	4.59706	5.10978	4.80494		4.53699	2.03732				5.24441	-0.898427	-0.409019	-0.293676
P43897	Elongation factor Ts, mitochondrial	TSFM	2.54427e+07	1.65238e+07	2.41926e+07	2.44537e+07	2.36889e+07	1.85022e+07	1.1791e+07	2.02184e+07	1.78715e+07	2.16651e+07	1.19427e+07	2.26429e+07	12		24.6008	23.978	24.5281	24.5435	24.4977	24.1412	23.4912	24.2692	24.0912	24.3689	23.5096	24.4326		1.82242	0.946504	1.32754	1.4436	1.52741	1.00938	1.20794	1.60107	1.76035	1.9155	1.58166	1.99097	1.5112				2.08036	1.09704	1.56483	1.68619
P26373	60S ribosomal protein L13	RPL13	1.67545e+08	1.12556e+08	1.76448e+08	1.60536e+08	1.57445e+08	1.50035e+08	9.27661e+07	143517544	103340640	1.00927e+08	7.81911e+07	9.03361e+07	12		27.32	26.7461	27.3947	27.2583	27.2303	27.1607	26.4671	27.0967	26.6228	26.5887	26.2205	26.4288		4.54165	3.71453	4.19415	4.15838	4.25998	4.0289	4.18385	4.42856	4.29203	4.13537	4.29253	3.98722	4.18476				5.18446	4.30532	4.94383	4.85718
P42224	Signal transducer and activator of transcription 1-alpha/beta	STAT1	7.40515e+06	4.65832e+06	5.48309e+06	4.47094e+06	1.59501e+07	5.74105e+06	8.73521e+06	1.02885e+07	7.7926e+06	1.01485e+07	6.46406e+06	1.47336e+07	12		22.8201	22.1514	22.3866	22.0921	23.9271	22.4529	23.0584	23.2945	22.8937	23.2748	22.624	23.8126		0.0417655	-0.88016	-0.813967	-1.0078	0.95677	-0.678937	0.775166	0.626433	0.562871	0.821395	0.696039	1.37103	0.205883				0.0476769	-1.02015	-0.959459	-1.17716
Q92769	Histone deacetylase 2	HDAC2	9.30003e+06	1.47929e+07	1.26979e+07	1.09714e+07	1.19136e+07	9664898	5.23156e+06	7.46901e+06	6.81922e+06	6.44751e+06	3.02387e+06	5.84829e+06	12		23.1488	23.8184	23.5981	23.3872	23.5061	23.2043	22.3188	22.8325	22.7012	22.6203	21.528	22.4796		0.370471	0.786858	0.397567	0.2873	0.535807	0.0725017	0.0355653	0.164397	0.370372	0.166945	-0.400006	0.0380002	0.235482				0.422907	0.912005	0.46863	0.33558
Q9UNF0	Protein kinase C and casein kinase substrate in neurons protein 2	PACSIN2	9.33191e+07	8.42433e+07	9.2241e+07	8.17987e+07	1.11747e+08	8.75143e+07	1.51685e+07	1.09472e+08	7.82875e+07	9.15817e+07	7.23223e+06	5.83411e+07	12		26.4757	26.3281	26.4589	26.2856	26.7357	26.383	23.8546	26.706	26.2223	26.4486	22.786	25.798		3.69734	3.29652	3.25838	3.18563	3.76537	3.25119	1.57134	4.0379	3.89148	3.99519	0.858039	3.35642	3.1804				4.22065	3.82082	3.8408	3.72096
Q8NI27	THO complex subunit 2	THOC2	1.89037e+07	1.5473e+07	1.67192e+07	17859784	11804840	1.43763e+07	1.13132e+07	1.62755e+07	1.3926e+07	1.66288e+07	1.16661e+07	1.4981e+07	12		24.1722	23.8833	23.995	24.0902	23.4929	23.7772	23.4315	23.9562	23.7313	23.9872	23.4758	23.8366		1.39383	0.851711	0.794476	0.990264	0.522581	0.645372	1.14826	1.28811	1.40048	1.53381	1.54785	1.39505	1.12598				1.59111	0.987173	0.936485	1.15667
Q9Y2Z0	Protein SGT1 homolog	SUGT1	1.74423e+07	2.36987e+07	2.97449e+07	2.72876e+07	1.57117e+07	1.94457e+07	1.06532e+07	1.13087e+07	4.92569e+06	8.79078e+06	2.81976e+06	4.67642e+06	12		24.0561	24.4983	24.8261	24.7017	23.9053	24.2129	23.3448	23.4309	22.2319	23.0676	21.4271	22.157		1.27776	1.46676	1.62561	1.60179	0.935041	1.08113	1.06154	0.762837	-0.0989066	0.614194	-0.500827	-0.284611	0.795194				1.45861	1.70005	1.91618	1.87097
P07355	Annexin A2	ANXA2	1.97952e+07	2.88424e+07	2.61065e+07	2.61352e+07	2.78372e+07	3.01674e+07	5.49325e+06	1.82651e+07	12200318	1.13417e+07	4.48859e+06	1.93441e+07	12		24.2386	24.7817	24.6379	24.6395	24.7305	24.8465	22.3892	24.1226	23.5404	23.4351	22.0978	24.2054		1.46031	1.75015	1.43738	1.53954	1.76022	1.71467	0.105984	1.4545	1.20961	0.981762	0.169861	1.7638	1.27898				1.667	2.02851	1.69431	1.79826
Q9BY44	Eukaryotic translation initiation factor 2A	EIF2A	4.05739e+07	1.14792e+07	1.26071e+07	8.87955e+06	1.55494e+07	7.08939e+06	7.46228e+07	1.01862e+07	1.02731e+07	1.26143e+07	5.7533e+07	9.63066e+06	12		25.274	23.4525	23.5877	23.0821	23.8904	22.7572	26.1531	23.2801	23.2924	23.5886	25.7779	23.1992		2.49572	0.420983	0.387213	-0.0178932	0.920064	-0.37459	3.86987	0.612027	0.961561	1.13519	3.84992	0.757619	1.25147				2.84895	0.48794	0.456426	-0.0209
O75150	E3 ubiquitin-protein ligase BRE1B	RNF40	4.89687e+07	1.81102e+07	2.78524e+06	4.17984e+07	3.62149e+07	292353	549784	4.655e+07	2.72522e+07	3.2868e+07	247022	2.03639e+07	12		25.5454	24.1103	21.4094	25.3169	25.1101	18.1574	19.0685	25.4723	24.6999	24.9702	17.9143	24.2795		2.76702	1.07876	-1.79115	2.217	2.13979	-4.97447	-3.21474	2.80419	2.36907	2.51681	-4.01369	1.83793	0.311376				3.15866	1.25033	-2.11131	2.58955
Q13907	Isopentenyl-diphosphate Delta-isomerase 1	IDI1	2.11724e+07	2.26133e+07	2.57218e+07	2.10543e+07	1.37379e+07	4.63004e+07	3.07634e+07	3.82263e+07	15032071	2.17797e+07	8086404	1.20825e+07	12		24.3357	24.4307	24.6165	24.3276	23.7117	25.4645	24.8747	25.1881	23.8415	24.3765	22.9471	23.5264		1.55735	1.39913	1.41596	1.22766	0.741364	2.3327	2.59147	2.51997	1.51074	1.92312	1.0191	1.08483	1.61028				1.77777	1.62165	1.66906	1.43397
O43660	Pleiotropic regulator 1	PLRG1	1.73558e+07	2.441e+07	1.01464e+07	7.28602e+06	1.72947e+07	6.58158e+06	1.36611e+07	2.19802e+07	1.15111e+07	1.2674e+07	1.79443e+07	1.25274e+07	12		24.0489	24.541	23.2745	22.7967	24.0438	22.65	23.7036	24.3897	23.4565	23.5954	24.097	23.5786		1.27058	1.50943	0.0739409	-0.303249	1.07354	-0.481818	1.42032	1.72161	1.12572	1.142	2.16905	1.13699	0.988178				1.45041	1.7495	0.0871574	-0.354208
Q9BRQ8	Apoptosis-inducing factor 2	AIFM2	1.30806e+07	1.41462e+07	1.57252e+07	1.4715e+07	1.6071e+07	1.45494e+07	19985312	1.11898e+07	1.37931e+07	1.25785e+07	2.20966e+07	8.82993e+06	12		23.6409	23.7539	23.9066	23.8108	23.938	23.7945	24.2524	23.4157	23.7174	23.5845	24.3973	23.074		0.862591	0.722374	0.706055	0.710837	0.967667	0.662638	1.96919	0.747587	1.38664	1.13109	2.46935	0.632387	1.0807				0.984679	0.837265	0.832259	0.83029
Q9GZR7	ATP-dependent RNA helicase DDX24	DDX24	9299187	1.11179e+07	1.09511e+07	1.14121e+07	1.69432e+06	1.33481e+07	6.42939e+06	11548455	7.15022e+06	9.08566e+06	6.05611e+06	9.57039e+06	12		23.1487	23.4064	23.3846	23.4441	20.6923	23.6701	22.6163	23.4612	22.7696	23.1152	22.53	23.1901		0.370341	0.37484	0.184055	0.344117	-2.27802	0.538311	0.333006	0.793107	0.438754	0.661793	0.601991	0.748561	0.259238				0.422758	0.434457	0.216954	0.401944
O43852	Calumenin	CALU	5.35277e+07	6.46574e+07	7.14699e+07	6.35394e+07	7.8e+07	7.89209e+07	3.88416e+07	4.69311e+07	3.47777e+07	3.94121e+07	2.45542e+07	4.10332e+07	12		25.6738	25.9463	26.0908	25.9211	26.217	26.2339	25.2111	25.484	25.0517	25.2321	24.5495	25.2903		2.89545	2.91477	2.89031	2.8212	3.24668	3.10208	2.92785	2.81595	2.72086	2.77877	2.6215	2.84871	2.88201				3.30526	3.37836	3.40694	3.29529
Q5QJE6	Deoxynucleotidyltransferase terminal-interacting protein 2	DNTTIP2	6.77527e+06	1.66108e+07	1.56568e+07	1.6256e+07	1.43039e+07	1.54334e+07	4.32295e+06	6.52124e+06	5.78017e+06	4.82893e+06	2.66388e+06	2.92117e+06	12		22.6918	23.9856	23.9003	23.9545	23.7699	23.8796	22.0436	22.6367	22.4627	22.2033	21.3451	21.4781		-0.0864861	0.954076	0.699764	0.854526	0.799608	0.747734	-0.239659	-0.0313751	0.131878	-0.250094	-0.582874	-0.96347	0.169469				-0.0987271	1.10582	0.824843	0.998125
P21912	Succinate dehydrogenase [ubiquinone] iron-sulfur subunit, mitochondrial	SDHB	1.99479e+07	3.89915e+07	40116754	3.26978e+07	3.87764e+07	2.84953e+07	3.95981e+07	2.15784e+07	1.55015e+07	2.12375e+07	1.59595e+07	1.70089e+07	12		24.2497	25.2167	25.2577	24.9627	25.2087	24.7642	25.2389	24.3631	23.8859	24.3401	23.9279	24.0198		1.4714	2.18512	2.05718	1.86274	2.23838	1.6324	2.95568	1.695	1.5551	1.88675	1.99994	1.5782	1.92649				1.67966	2.53265	2.42489	2.17577
P35573	Glycogen debranching enzyme	AGL	4.43611e+06	1.24567e+07	4.07246e+07	3.97616e+07	9.8946e+06	3.06695e+07	1.8616e+06	3.37553e+06	5.54152e+06	2.59689e+06	2.31787e+06	3.66488e+06	12		22.0809	23.5704	25.2794	25.2449	23.2382	24.8703	20.8281	21.6867	22.4019	21.3084	21.1444	21.8053		-0.69747	0.538879	2.07888	2.14493	0.267916	1.73848	-1.45513	-0.981405	0.071049	-1.14501	-0.7836	-0.63625	0.0951047				-0.796188	0.624586	2.45046	2.50537
P45880	Voltage-dependent anion-selective channel protein 2	VDAC2	2.22838e+08	2.78259e+08	2.98039e+08	2.4186e+08	2.61126e+08	203838676	1.68618e+08	1.92703e+08	1.6458e+08	2.57767e+08	1.88668e+08	2.65668e+08	12		27.7314	28.0519	28.1509	27.8496	27.9602	27.6029	27.3292	27.5218	27.2942	27.9415	27.4913	27.985		4.95309	5.02032	4.9504	4.74965	4.98988	4.47103	5.04594	4.85372	4.96341	5.48813	5.5633	5.54347	5.04936				5.65414	5.81878	5.83526	5.54781
P51610	Host cell factor 1	HCFC1	1.40283e+07	1.54785e+07	2.15474e+07	1.86573e+07	1.38756e+07	1.61683e+07	9.90658e+06	1.24605e+07	1.04183e+07	1.02547e+07	1.03033e+07	1.07006e+07	12		23.7418	23.8838	24.361	24.1532	23.7261	23.9467	23.24	23.5709	23.3126	23.2898	23.2966	23.3512		0.963502	0.852225	1.16049	1.05329	0.755756	0.814847	0.956711	0.902765	0.981815	0.83641	1.36864	0.909601	0.963004				1.09987	0.987769	1.36792	1.23029
O43684	Mitotic checkpoint protein BUB3	BUB3	2.83055e+07	3.7909e+07	4.34224e+07	4.15647e+07	3.40698e+07	3.96906e+07	16025055	1.80489e+07	1.21482e+07	1.6943e+07	1.08861e+07	14179644	12		24.7546	25.176	25.3719	25.3089	25.022	25.2423	23.9338	24.1054	23.5342	24.0142	23.376	23.7573		1.97625	2.1445	2.17141	2.20891	2.0517	2.11047	1.65058	1.43732	1.20344	1.56082	1.44801	1.31573	1.77326				2.25596	2.48558	2.55954	2.58011
Q13045	Protein flightless-1 homolog	FLII	6.32809e+07	8.12261e+07	1.89875e+07	9.19885e+07	1.02056e+08	8.37589e+07	2.04229e+06	4.86686e+07	3.888e+06	4.7283e+06	1.20143e+06	2.82601e+06	12		25.9153	26.2754	24.1785	26.455	26.6048	26.3197	20.9618	25.5365	21.8906	22.1729	20.1963	21.4303		3.13693	3.2439	0.978022	3.355	3.63449	3.18792	-1.32149	2.8684	-0.440204	-0.280475	-1.73164	-1.01125	1.30163				3.58093	3.75983	1.15284	3.9188
Q8WTW3	Conserved oligomeric Golgi complex subunit 1	COG1	2.36566e+07	2.8729e+07	1.70121e+07	2.65373e+07	1.77505e+07	18715298	1.1004e+07	2.25874e+07	1.90648e+07	1.87099e+07	4.76389e+06	3.10832e+07	12		24.4957	24.776	24.0201	24.6615	24.0814	24.1577	23.3915	24.429	24.1844	24.1573	22.1837	24.8896		1.71741	1.74446	0.819532	1.56157	1.11106	1.02589	1.10828	1.76093	1.8536	1.70393	0.25574	2.44805	1.42587				1.96049	2.02192	0.966019	1.82399
P15880	40S ribosomal protein S2	RPS2	1.62482e+08	2.32181e+08	2.4986e+08	2.42924e+08	1.57237e+08	2.23497e+08	1.09777e+08	1.41447e+08	1.07607e+08	122058604	8.34254e+07	1.17773e+08	12		27.2757	27.7907	27.8965	27.8559	27.2284	27.7357	26.71	27.0757	26.6812	26.863	26.314	26.8114		4.49737	4.75914	4.69602	4.75598	4.25807	4.60386	4.42675	4.40759	4.35039	4.40963	4.38601	4.36985	4.49339				5.13392	5.51607	5.53541	5.5552
O15143	Actin-related protein 2/3 complex subunit 1B	ARPC1B	9.97988e+07	8.40222e+07	1.09231e+08	9.5101e+07	1.25638e+08	110140164	9.44331e+06	7.67781e+07	1.30838e+07	1.21283e+07	9.64154e+06	7.59154e+06	12		26.5725	26.3243	26.7028	26.503	26.9047	26.7148	23.1709	26.1942	23.6413	23.5319	23.2008	22.856		3.79419	3.29273	3.50228	3.40301	3.9344	3.58294	0.887616	3.5261	1.31048	1.07851	1.27286	0.414377	2.49996				4.33121	3.81643	4.1283	3.97487
P31150	Rab GDP dissociation inhibitor alpha	GDI1	4.08291e+06	4.42808e+06	5.4011e+06	5.06411e+06	4242937	4.68559e+06	4.1426e+06	3.88578e+06	6.47738e+06	3.89677e+06	1.69255e+06	2.59361e+06	12		21.9612	22.0782	22.3648	22.2719	22.0166	22.1598	21.9821	21.8898	22.627	21.8938	20.6908	21.3065		-0.817167	-0.95329	-0.835701	-0.828069	-0.953662	-0.972022	-0.30114	-0.778316	0.296176	-0.55952	-1.2372	-1.13505	-0.756247				-0.932826	-1.10491	-0.985079	-0.967223
Q14444	Caprin-1	CAPRIN1	2.05779e+07	3.6364e+07	22032314	3.23454e+07	2.1829e+07	1.40215e+07	7.60157e+07	2.28463e+08	2.33362e+08	2.48274e+08	4.76364e+07	1.91383e+07	12		24.2946	25.116	24.3931	24.9471	24.3797	23.7411	26.1798	27.7674	27.798	27.8874	25.5056	24.19		1.51626	2.08447	1.19259	1.84711	1.40945	0.609312	3.89655	5.09929	5.46719	5.43399	3.57759	1.74838	2.82352				1.73087	2.416	1.40576	2.15751
Q96I99	Succinate--CoA ligase [GDP-forming] subunit beta, mitochondrial	SUCLG2	8.77639e+07	8.90968e+07	9.14427e+07	8.67337e+07	1.07162e+08	9.23692e+07	6.76005e+07	9.38863e+07	7.39115e+07	9.4493e+07	7.69366e+07	5.99782e+07	12		26.3871	26.4089	26.4464	26.3701	26.6752	26.4609	26.0105	26.4844	26.1393	26.4937	26.1972	25.8379		3.60879	3.37733	3.24584	3.27014	3.70493	3.32909	3.72729	3.81632	3.80849	4.04034	4.2692	3.39635	3.63284				4.11957	3.91449	3.82602	3.81968
O75955	Flotillin-1	FLOT1	1.49454e+07	2.15374e+07	3.43214e+07	2.49821e+07	1.43949e+07	2.68773e+07	1.12939e+07	1.82667e+07	1.23485e+07	1.58878e+07	1.26478e+07	1.89639e+07	12		23.8332	24.3603	25.0326	24.5744	23.7791	24.6799	23.429	24.1227	23.5578	23.9214	23.5924	24.1768		1.05487	1.3288	1.83208	1.47444	0.808762	1.54806	1.1458	1.45462	1.22703	1.46805	1.66442	1.73517	1.39518				1.20417	1.54014	2.15956	1.72222
Q14151	Scaffold attachment factor B2	SAFB2	2.00336e+06		1.30009e+06	1.65809e+06	433960	3.15557e+06	1.61464e+06	1.9373e+06	2.26979e+06	1.66535e+06	974812	2211093	11		20.934		20.3102	20.6611	18.7272	21.5895	20.6228	20.8856	21.1141	20.6674	19.8948	21.0763		-1.84434		-2.89035	-2.43885	-4.24309	-1.54235	-1.66047	-1.78247	-1.21668	-1.78597	-2.0332	-1.36526	-2.073				-2.10538		-3.40698	-2.84869
Q10713	Mitochondrial-processing peptidase subunit alpha	PMPCA	2.18746e+07	2.78924e+07	3.22395e+07	3.03222e+07	3.07066e+07	2.3612e+07	1.49426e+07	2.05856e+07	1.37186e+07	1.46796e+07	1.10278e+07	1.37371e+07	12		24.3828	24.7334	24.9423	24.8539	24.872	24.493	23.8329	24.2951	23.7096	23.8073	23.3946	23.7116		1.60442	1.70183	1.7418	1.75392	1.90175	1.3612	1.54969	1.62704	1.37883	1.35394	1.46667	1.26999	1.55926				1.8315	1.9725	2.05314	2.04866
O75306	NADH dehydrogenase [ubiquinone] iron-sulfur protein 2, mitochondrial	NDUFS2	3.27291e+07	4.40471e+07	3.73743e+07	3.97517e+07	4.18626e+07	4.35419e+07	1.85008e+07	2.1085e+07	2.24623e+07	2.7562e+07	2.01045e+07	30854597	12		24.9641	25.3925	25.1555	25.2445	25.3192	25.3759	24.1411	24.3297	24.421	24.7162	24.261	24.879		2.18574	2.361	1.95502	2.14456	2.34887	2.24408	1.85784	1.66162	2.0902	2.26281	2.33304	2.4374	2.15685				2.4951	2.73651	2.30447	2.50495
Q00325	Phosphate carrier protein, mitochondrial	SLC25A3	2.10843e+08	2.36167e+08	2.34819e+08	2.4841e+08	288961904	260331536	1.40489e+08	1.91612e+08	1.19872e+08	1.80453e+08	1.09757e+08	1.84085e+08	12		27.6516	27.8152	27.807	27.8881	28.1063	27.9558	27.0659	27.5136	26.8369	27.427	26.7097	27.4558		4.87326	4.78369	4.60645	4.7882	5.13601	4.82395	4.78264	4.84553	4.50611	4.97368	4.78177	5.01422	4.82629				5.56301	5.54453	5.42983	5.59284
Q15008	26S proteasome non-ATPase regulatory subunit 6	PSMD6	2.53757e+07	3.88925e+07	3.95613e+07	3.76321e+07	2.35271e+07	4.23996e+07	1.29316e+07	2.92655e+07	18440421	1.81669e+07	1.36764e+07	1.60981e+07	12		24.5969	25.213	25.2376	25.1655	24.4878	25.3375	23.6244	24.8027	24.1364	24.1148	23.7052	23.9404		1.81861	2.18145	2.03706	2.06551	1.51752	2.20573	1.34115	2.13461	1.80557	1.66144	1.77722	1.49881	1.83706				2.07602	2.5284	2.40118	2.41261
Q13618	Cullin-3	CUL3	4.54752e+06	1.3128e+07	1.42297e+07	12884841	1.01372e+07	1.16288e+07	1.29867e+06	2.20059e+07	1.65746e+07	1.61526e+07	800196	1.00833e+07	12		22.1166	23.6461	23.7624	23.6192	23.2732	23.4712	20.3086	24.3914	23.9825	23.9453	19.61	23.2655		-0.661683	0.61461	0.561877	0.519224	0.302858	0.339379	-1.97465	1.7233	1.65167	1.4919	-2.31797	0.823879	0.256199				-0.755336	0.712362	0.66231	0.606477
Q14847	LIM and SH3 domain protein 1	LASP1	3.88364e+07	70718884	6.58054e+07	6.67652e+07	63676193	6.60552e+07	19316347	3.0279e+07	12675827	1.33329e+07	7.38323e+06	5533028	12		25.2109	26.0756	25.9717	25.9926	25.9243	25.9772	24.2033	24.8518	23.5956	23.6685	22.8158	22.3996		2.43257	3.04405	2.77118	2.89265	2.95396	2.84535	1.92007	2.18372	1.26477	1.21513	0.887851	-0.0419465	2.03078				2.77687	3.5282	3.26651	3.37874
O95433	Activator of 90 kDa heat shock protein ATPase homolog 1	AHSA1	9.36657e+07	1.81193e+07	2.0857e+07	1.65397e+07	4.71856e+07	2.26007e+07	1.13331e+07	3.9569e+07	3.03751e+07	3.223e+07	5.62309e+06	2.7734e+07	12		26.481	24.111	24.314	23.9794	25.4918	24.4299	23.434	25.2379	24.8564	24.9419	22.4229	24.7252		3.70269	1.07949	1.11351	0.879483	2.52155	1.29804	1.15079	2.56978	2.52559	2.48853	0.494962	2.28357	1.84233				4.22675	1.25118	1.31254	1.02728
O60749	Sorting nexin-2	SNX2	2.29905e+07	24303208	2.61553e+07	2.08322e+07	31791345	1.75231e+07	8.77426e+06	2.4013e+07	1.8896e+07	2.31268e+07	1.12721e+07	1.5625e+07	12		24.4545	24.5346	24.6406	24.3123	24.9221	24.0628	23.0648	24.5173	24.1716	24.4631	23.4263	23.8974		1.6762	1.5031	1.44007	1.21237	1.95184	0.930932	0.781602	1.84922	1.84077	2.0097	1.49829	1.45577	1.51249				1.91345	1.74217	1.69748	1.4161
Q9BRX8	Peroxiredoxin-like 2A	PRXL2A	3.35124e+07	4.23821e+07	4.71745e+07	4.42621e+07	5.08861e+07	3.23139e+07	3.20014e+07	4.27535e+07	4.60546e+07	5.74995e+07	3.07972e+07	3.49349e+07	12		24.9982	25.337	25.4915	25.3996	25.6008	24.9457	24.9316	25.3495	25.4568	25.777	24.8763	25.0582		2.21986	2.30541	2.29098	2.29962	2.63047	1.81383	2.64839	2.68145	3.12604	3.32368	2.94833	2.61658	2.57539				2.53405	2.67208	2.70048	2.68606
P10412	Histone H1.4	HIST1H1E	3.32384e+07	9.75171e+06	5.35532e+06	5.56712e+07	1.11861e+07	7.10386e+06	1.51005e+07	2.19717e+07	1.19745e+07	1.30096e+07	1.94681e+07	6.27763e+06	12		24.9863	23.2172	22.3525	25.7304	23.4152	22.7602	23.8481	24.3891	23.5135	23.6331	24.2146	22.5818		2.20801	0.185685	-0.847983	2.63048	0.444909	-0.371649	1.56485	1.72106	1.18266	1.1797	2.28664	0.140205	1.02705				2.52053	0.215217	-0.999556	3.07252
P46060	Ran GTPase-activating protein 1	RANGAP1	5.45735e+07	6.40933e+07	3.91109e+07	5.46988e+07	1.07633e+08	6.03492e+07	3.26553e+07	2.90199e+07	2.59656e+07	2.62154e+07	3.1481e+07	2.20257e+07	12		25.7017	25.9337	25.2211	25.705	26.6816	25.8468	24.9608	24.7905	24.6301	24.6439	24.908	24.3927		2.92337	2.90213	2.02054	2.60506	3.71126	2.71501	2.67757	2.12245	2.2993	2.19054	2.98001	1.9511	2.59153				3.33713	3.36371	2.38171	3.04283
Q9BY77	Polymerase delta-interacting protein 3	POLDIP3	2.68036e+07	2.0054e+07	1.56414e+07	2.25783e+07	3.32859e+07	2.02967e+07	1.46083e+07	2.66335e+07	16390531	1.88388e+07	2.09274e+07	1.60523e+07	12		24.6759	24.2574	23.8989	24.4284	24.9884	24.2747	23.8003	24.6667	23.9664	24.1672	24.3189	23.9363		1.89759	1.22585	0.698346	1.32849	2.01811	1.14292	1.51704	1.99865	1.63556	1.71384	2.39092	1.49469	1.5885				2.16617	1.42082	0.823171	1.55173
Q96C23	Aldose 1-epimerase	GALM	2.37644e+07	4.48816e+07	4.67441e+07	4.99771e+07	3.35984e+07	3.93165e+07	1.18384e+07	2.42824e+07	9.01221e+06	9.81586e+06	2.03853e+06	3.65064e+06	12		24.5023	25.4196	25.4783	25.5748	25.0019	25.2286	23.497	24.5334	23.1034	23.2267	20.9591	21.7997		1.72397	2.38808	2.27776	2.47482	2.0316	2.09681	1.21372	1.86532	0.772647	0.773317	-0.968873	-0.641865	1.33394				1.96798	2.7679	2.6849	2.8907
O95486	Protein transport protein Sec24A	SEC24A	1.20805e+07	1.84177e+07	1.88789e+07	2.08993e+07	1.9472e+07	1.60523e+07	1.99293e+07	1.43763e+07	2.37724e+07	1.07963e+07	1.42424e+07	8.40533e+06	12		23.5262	24.1346	24.1703	24.317	24.2149	23.9363	24.2484	23.7772	24.5028	23.364	23.7637	23.0029		0.747842	1.10305	0.969745	1.21701	1.2446	0.804453	1.96514	1.1091	2.17198	0.91067	1.83572	0.561288	1.22005				0.85369	1.27849	1.14308	1.42152
Q96RP9	Elongation factor G, mitochondrial	GFM1	2.37258e+07	2.20484e+07	1.22803e+07	3.1969e+07	3.20088e+07	9.16593e+06	1.9191e+07	1.92804e+07	1.22013e+07	1.40904e+07	1.12779e+07	6.19975e+06	12		24.5	24.3942	23.5498	24.9302	24.932	23.1278	24.1939	24.2006	23.5405	23.7482	23.427	22.5638		1.72162	1.36263	0.34932	1.83022	1.96167	-0.00397175	1.91068	1.53254	1.20973	1.29484	1.49903	0.122195	1.23254				1.96529	1.57935	0.41176	2.13778
Q9NYK5	39S ribosomal protein L39, mitochondrial	MRPL39	3.36658e+07	4.96127e+07	5.24662e+07	4.52416e+07	4.08271e+07	49108271	1.04393e+07	2.79623e+07	1.63926e+07	3.25964e+07	5.76899e+06	2.84935e+07	12		25.0048	25.5642	25.6449	25.4311	25.283	25.5495	23.3155	24.737	23.9665	24.9582	22.4599	24.7641		2.22645	2.53267	2.44436	2.3312	2.31273	2.41764	1.03228	2.06889	1.63574	2.50484	0.531918	2.32255	2.0301				2.54157	2.93548	2.88128	2.72295
Q13547	Histone deacetylase 1	HDAC1	2.03802e+07	2.38036e+07	1.8136e+07	2.51428e+07	2.33457e+07	3.14746e+07	1.70234e+07	2.18648e+07	1.54992e+07	1.67136e+07	1.2622e+07	1.57793e+07	12		24.2807	24.5047	24.1124	24.5836	24.4767	24.9077	24.021	24.3821	23.8857	23.9945	23.5894	23.9115		1.50234	1.47314	0.911833	1.48369	1.50636	1.77586	1.73777	1.71401	1.55489	1.54115	1.66147	1.46995	1.5277				1.71497	1.70743	1.07482	1.73302
Q9Y3Z3	Deoxynucleoside triphosphate triphosphohydrolase SAMHD1	SAMHD1	1.12456e+07	1.03278e+07	5.73571e+07	3.97944e+07	1.54038e+07	5.57514e+07	1.19224e+07	1.34616e+07	1.19265e+07	1.83556e+07	1.31803e+07	1.3249e+07	12		23.4229	23.3	25.7735	25.2461	23.8768	25.7325	23.5072	23.6823	23.5077	24.1297	23.6519	23.6594		0.644525	0.268487	2.57295	2.14611	0.906492	2.60068	1.22393	1.01426	1.17687	1.67635	1.72391	1.2178	1.43103				0.735749	0.311189	3.03285	2.50676
O43615	Mitochondrial import inner membrane translocase subunit TIM44	TIMM44	28786068	2.9957e+07	2.68874e+07	2.33382e+07	3.76133e+07	2.99849e+07	8.4663e+06	2.83456e+07	3.60937e+07	3.85323e+07	4.71924e+06	3.4753e+07	12		24.7789	24.8364	24.6804	24.4762	25.1647	24.8377	23.0133	24.7566	25.1052	25.1996	22.1701	25.0506		2.00054	1.80485	1.47991	1.37624	2.19445	1.70591	0.730056	2.08853	2.77444	2.7462	0.242155	2.60905	1.81269				2.28369	2.0919	1.74443	1.60751
Q9NUD5	Zinc finger CCHC domain-containing protein 3	ZCCHC3	2.69848e+07	3.12623e+07	3.92173e+07	3.85416e+07	2.78177e+07	3.08043e+07	2.97885e+07	2.55208e+07	1.85315e+07	1.94682e+07	2.40936e+07	1.68505e+07	12		24.6856	24.8979	25.225	25.1999	24.7295	24.8766	24.8283	24.6052	24.1435	24.2146	24.5221	24.0063		1.90731	1.86638	2.02446	2.09997	1.75921	1.7448	2.54501	1.93708	1.81268	1.76125	2.59418	1.5647	1.96809				2.17727	2.16322	2.38632	2.45286
O96008	Mitochondrial import receptor subunit TOM40 homolog	TOMM40	3.81151e+07	4.65164e+07	6.73474e+07	4.75849e+07	45538380	6.32775e+07	2.81544e+07	2.8549e+07	2.7565e+07	2.86797e+07	2.36457e+07	3.09718e+07	12		25.1839	25.4712	26.0051	25.504	25.4406	25.9152	24.7469	24.7669	24.7163	24.7735	24.4951	24.8845		2.40553	2.4397	2.8046	2.40405	2.47029	2.78337	2.46361	2.09885	2.38553	2.32016	2.5671	2.44287	2.46547				2.746	2.82772	3.3059	2.80804
Q16851	UTP--glucose-1-phosphate uridylyltransferase	UGP2	2.30951e+07	3.82078e+07	5.48698e+07	4.45472e+07	3.73938e+07	3.55584e+07	1.76573e+07	1.74995e+07	1.05991e+07	1.15721e+07	5.67246e+06	3.68028e+06	12		24.4611	25.1874	25.7095	25.4088	25.1563	25.0837	24.0738	24.0608	23.3374	23.4641	22.4355	21.8114		1.68275	2.15582	2.50899	2.30888	2.186	1.95187	1.79052	1.39272	1.00663	1.01078	0.507573	-0.630201	1.48936				1.92092	2.4987	2.95745	2.69688
P09543	2',3'-cyclic-nucleotide 3'-phosphodiesterase	CNP	2.07227e+07	2.21307e+07	3.74816e+07	3.74857e+07	3.44131e+07	4.70329e+07	9.63955e+06	1.98359e+07	2.836e+07	2.93374e+07	7.80709e+06	5.75991e+07	12		24.3047	24.3995	25.1597	25.1598	25.0365	25.4872	23.2005	24.2416	24.7574	24.8062	22.8964	25.7795		1.52637	1.36801	1.95916	2.05989	2.06616	2.35535	0.91729	1.57352	2.42655	2.35287	0.968384	3.33796	1.90929				1.74241	1.58558	2.30935	2.40605
P43246	DNA mismatch repair protein Msh2	MSH2	2.01153e+07	8.16619e+07	9.12077e+07	8.53522e+07	9.04553e+07	7.34567e+07	1.02839e+07	1.72386e+07	1.40825e+07	1.02712e+07	1.4525e+07	1.03687e+07	12		24.2618	26.2832	26.4427	26.3469	26.4307	26.1304	23.2939	24.0391	23.7474	23.2921	23.792	23.3057		1.48346	3.25162	3.24213	3.24698	3.46041	2.99857	1.01064	1.37105	1.4166	0.838735	1.86406	0.864143	2.08737				1.69342	3.76878	3.82164	3.79262
Q9UBE0	SUMO-activating enzyme subunit 1	SAE1	1.40893e+07	2.17749e+07	24784492	2.58969e+07	2.60748e+07	2.74975e+07	1.16125e+07	1.34003e+07	8.00977e+06	1.12738e+07	9.20872e+06	8.55946e+06	12		23.7481	24.3762	24.5629	24.6263	24.6362	24.7128	23.4692	23.6758	22.9333	23.4265	23.1346	23.0291		0.969765	1.34462	1.36241	1.52633	1.66586	1.58098	1.18593	1.00767	0.602526	0.973109	1.2066	0.587504	1.16778				1.10702	1.55848	1.60593	1.78282
Q14677	Clathrin interactor 1	CLINT1	1.19333e+07	1.7494e+07	2.20875e+07	2.03645e+07	2.03932e+07	1.85132e+07	4025767	1.12898e+07	2.15283e+07	3.13637e+07	1.71277e+06	5.83459e+06	12		23.5085	24.0604	24.3967	24.2796	24.2816	24.1421	21.9408	23.4285	24.3597	24.9026	20.7079	22.4762		0.730152	1.02882	1.19621	1.1796	1.31129	1.01023	-0.342413	0.76043	2.02893	2.44923	-1.22007	0.0346163	0.847252				0.833496	1.19245	1.41002	1.37783
P54819	Adenylate kinase 2, mitochondrial	AK2	4.43886e+07	5.83881e+07	5.45686e+07	1.16227e+08	1.94971e+07	6.2645e+07	3.57329e+07	3.37703e+07	2.46573e+07	2.47532e+07	1.3015e+07	1.61258e+07	12		25.4037	25.7992	25.7016	26.7924	24.2168	25.9007	25.0908	25.0093	24.5555	24.5611	23.6337	23.9429		2.62535	2.76763	2.50104	3.69242	1.24647	2.76887	2.80751	2.34116	2.22471	2.10774	1.70571	1.50128	2.35749				2.99694	3.20782	2.94809	4.31291
P80303	Nucleobindin-2	NUCB2	2.70463e+07	3.64154e+07	4.30483e+07	2.86162e+07	2.33683e+07	2.94828e+07	9.28032e+06	1.99806e+07	9.17142e+06	1.06734e+07	8.75054e+06	9.20286e+06	12		24.6889	25.118	25.3595	24.7703	24.4781	24.8134	23.1457	24.2521	23.1287	23.3475	23.0609	23.1337		1.9106	2.0865	2.15893	1.67038	1.50776	1.68155	0.862498	1.584	0.797912	0.894149	1.13297	0.692066	1.41494				2.18102	2.41836	2.54483	1.95108
P17812	CTP synthase 1	CTPS1	1.21712e+07	1.42319e+07	1.50178e+07	1.53375e+07	1.29455e+07	15205700	5.16682e+06	8.98009e+06	8.48093e+06	1.1735e+07	8.38097e+06	7.98377e+06	12		23.537	23.7626	23.8402	23.8706	23.6259	23.8581	22.3008	23.0983	23.0158	23.4843	22.9987	22.9286		0.758632	0.731085	0.639649	0.770611	0.655653	0.726288	0.0176003	0.430209	0.684988	1.03095	1.07072	0.487054	0.666953				0.866007	0.847362	0.753983	0.90011
O75477	Erlin-1	ERLIN1	4.68096e+07	6.57811e+07	4.1874e+07	7.33475e+07	7.6946e+07	6.07646e+07	5.04112e+07	4.26144e+07	4.53707e+07	5.12784e+07	5.84854e+07	4.70541e+07	12		25.4803	25.9712	25.3196	26.1282	26.1973	25.8567	25.5872	25.3448	25.4353	25.6118	25.8016	25.4878		2.70197	2.93963	2.11903	3.0283	3.22705	2.72491	3.304	2.67675	3.10446	3.15848	3.8736	3.04623	2.99203				3.0844	3.40717	2.49779	3.53719
Q96I24	Far upstream element-binding protein 3	FUBP3	1.26414e+07	1.79351e+07	1.1584e+07	2.2566e+07	2.21106e+07	2.23591e+07	6.48559e+06	2.00527e+07	2.27885e+07	2.66698e+07	4.56511e+06	3.00444e+07	12		23.5917	24.0963	23.4656	24.4276	24.3982	24.4144	22.6288	24.2573	24.4418	24.6687	22.1222	24.8406		0.813321	1.06474	0.265108	1.3277	1.42794	1.28254	0.345563	1.5892	2.111	2.21534	0.194247	2.39901	1.25298				0.928436	1.23408	0.312495	1.55082
Q9H361	Polyadenylate-binding protein 3	PABPC3	7.15312e+06	1.51058e+06			6.48158e+06	5562988	4.75866e+06	6.9895e+06	3.61493e+06	5328288	4.41126e+06	3.82049e+06	10		22.7701	20.5267			22.6279	22.4074	22.1821	22.7368	21.7855	22.3452	22.0728	21.8653		-0.00819103	-2.50487			-0.342379	-0.724393	-0.10112	0.0686679	-0.545265	-0.108126	0.144791	-0.576257	-0.469714				-0.00935037	-2.90326
O43172	U4/U6 small nuclear ribonucleoprotein Prp4	PRPF4	3.71671e+07	4.05404e+07	4.26717e+07	4.01063e+07	4.06718e+07	3.95354e+07	2.49433e+07	3.78044e+07	2.3645e+07	2.6106e+07	3.3393e+07	2.67009e+07	12		25.1475	25.2729	25.3468	25.2573	25.2775	25.2366	24.5722	25.1721	24.495	24.6379	24.993	24.6704		2.36919	2.24132	2.14625	2.15738	2.30723	2.10482	2.28891	2.50396	2.16423	2.18451	3.06507	2.2288	2.31347				2.70452	2.59779	2.52988	2.51992
Q9UHX1	Poly(U)-binding-splicing factor PUF60	PUF60	2.78526e+07	1.06945e+07	2.19548e+07	1.2349e+07	1.50912e+07	1.13961e+07	1.42926e+07	2.0838e+07	1.30385e+07	1.07493e+07	7.57656e+06	11387982	12		24.7313	23.3504	24.388	23.5579	23.8472	23.442	23.7688	24.3127	23.6363	23.3577	22.8531	23.441		1.95298	0.31883	1.18751	0.457938	0.876915	0.31021	1.48552	1.64463	1.30547	0.904367	0.925142	0.999425	1.03074				2.22939	0.369539	1.39977	0.534892
Q9NW13	RNA-binding protein 28	RBM28	1.43698e+07	3.14058e+07	3.95483e+07	3.30041e+07	1.26696e+07	3.70353e+07	1.5453e+07	1.40433e+07	9.7041e+06	1.23044e+07	1.8617e+07	1.28072e+07	12		23.7765	24.9045	25.2371	24.9761	23.5949	25.1424	23.8814	23.7434	23.2102	23.5527	24.1501	23.6105		0.998202	1.87299	2.03659	1.87619	0.624575	2.01058	1.59813	1.07529	0.87936	1.09931	2.22215	1.16887	1.45519				1.13949	2.17088	2.40062	2.19148
A0MZ66	Shootin-1	SHTN1	5.93193e+07	1.07201e+07	2.91165e+06	1.39982e+07	3.33346e+07	4.32862e+07	690795	5.28387e+07	2.13172e+07	2.24488e+07	564066	4.05469e+07	12		25.822	23.3538	21.4734	23.7387	24.9905	25.3674	19.3979	25.6551	24.3455	24.4201	19.1055	25.2731		3.04367	0.322273	-1.72712	0.638791	2.02022	2.23558	-2.88535	2.987	2.01471	1.96677	-2.82247	2.8315	0.885466				3.47446	0.37353	-2.03583	0.746137
O95347	Structural maintenance of chromosomes protein 2	SMC2	7.24506e+06	1.19382e+07	1.20628e+07	9.76038e+06	7.12984e+06	1.36351e+07	7.45926e+06	7.94909e+06	4.77797e+06	6.27585e+06	1.32864e+07	4.78148e+06	12		22.7886	23.5091	23.5241	23.2185	22.7654	23.7008	22.8306	22.9224	22.188	22.5814	23.6635	22.189		0.0102346	0.477543	0.323532	0.118559	-0.204855	0.569	0.547357	0.25427	-0.142837	0.128012	1.73548	-0.252558	0.296978				0.0116831	0.553494	0.381362	0.138482
Q13268	Dehydrogenase/reductase SDR family member 2, mitochondrial	DHRS2	1.32818e+08	1.85233e+08	1.987e+08	1.86397e+08	2.37033e+08	2.22597e+08	1.9231e+08	2.04796e+08	1.54535e+08	1.76784e+08	1.31584e+08	9.89781e+07	12		26.9849	27.4648	27.566	27.4738	27.8205	27.7299	27.5189	27.6096	27.2034	27.3974	26.9714	26.5606		4.20655	4.43322	4.36549	4.37386	4.85022	4.59804	5.23561	4.94152	4.87255	4.94404	5.04344	4.11902	4.6653				4.80193	5.13831	5.1458	5.10887
P05026	Sodium/potassium-transporting ATPase subunit beta-1	ATP1B1	4.45553e+07	8.98569e+07	1.01896e+08	7.84561e+07	7.86382e+07	6.69979e+07	5.29136e+07	4.47139e+07	4.82862e+07	6.41228e+07	6.1981e+07	4.89796e+07	12		25.4091	26.4211	26.6025	26.2254	26.2287	25.9976	25.6571	25.4142	25.5251	25.9343	25.8853	25.5457		2.63076	3.38959	3.402	3.12544	3.25843	2.86579	3.37389	2.74613	3.19431	3.48097	3.95735	3.10409	3.21073				3.00311	3.92869	4.01009	3.65065
P60228	Eukaryotic translation initiation factor 3 subunit E	EIF3E	6.84039e+07	4.68796e+07	38503370	4.64392e+07	9.47292e+07	4.80041e+07	1.06368e+07	4.96395e+07	7.09252e+06	7032395	6.7876e+06	1.41414e+07	12		26.0276	25.4825	25.1985	25.4688	26.4973	25.5167	23.3426	25.565	22.7579	22.7456	22.6945	23.7534		3.24924	2.45092	1.99796	2.36889	3.52701	2.38483	1.05931	2.8969	0.427065	0.292218	0.7665	1.31184	1.89439				3.70913	2.84073	2.35508	2.76697
P14550	Aldo-keto reductase family 1 member A1	AKR1A1	4.59415e+07	4.92735e+07	6.57085e+07	5.76901e+07	5.51168e+07	8.25164e+07	1.94595e+07	5.06312e+07	2.11231e+07	2.68426e+07	1.57807e+07	1.35953e+07	12		25.4533	25.5543	25.9696	25.7818	25.716	26.2982	24.214	25.5935	24.3323	24.678	23.9117	23.6966		2.67496	2.52277	2.76905	2.68187	2.74569	3.16636	1.93072	2.92543	2.00152	2.22466	1.98369	1.25502	2.40681				3.05357	2.92401	3.26401	3.13255
O43237	Cytoplasmic dynein 1 light intermediate chain 2	DYNC1LI2	9.27934e+06	2.25641e+07	9.8996e+06	3.36238e+07	4.0312e+07	2.84141e+07	1.06312e+07	1.6705e+07	1.20621e+07	9.8937e+06	1.88513e+07	9.33013e+06	12		23.1456	24.4275	23.2389	25.003	25.2647	24.7601	23.3418	23.9938	23.524	23.2381	24.1682	23.1535		0.367258	1.39599	0.0384155	1.90303	2.29441	1.62828	1.05856	1.32568	1.19317	0.784713	2.24019	0.711882	1.24513				0.419239	1.61801	0.0452821	2.22283
P50453	Serpin B9	SERPINB9	7.05624e+06	1.60707e+07	2.58076e+07	1.26665e+07	3.23985e+07	2.30481e+07	1.38758e+07	3.37643e+07	1.45967e+07	1.48831e+07	2.31546e+06	6.29499e+06	12		22.7505	23.9379	24.6213	23.5945	24.9494	24.4581	23.7261	25.009	23.7991	23.8272	21.1429	22.5858		-0.0278646	0.90639	1.42077	0.494563	1.97913	1.32633	1.44282	2.3409	1.46834	1.37381	-0.785101	0.144189	1.00702				-0.0318085	1.05055	1.67472	0.577673
P11047	Laminin subunit gamma-1	LAMC1	13745109	1.53176e+07	1.09006e+07	1.65919e+07	2.20156e+07	1.4459e+07	2.09819e+07	1.8315e+07	6.68478e+06	6.06896e+06	1.08886e+07	10961302	12		23.7124	23.8687	23.3779	23.984	24.392	23.7855	24.3226	24.1265	22.6724	22.533	23.3763	23.3859		0.934083	0.837147	0.177383	0.884024	1.42173	0.653642	2.0394	1.45843	0.341647	0.0796507	1.44834	0.944332	0.934985				1.06629	0.970293	0.20909	1.03258
Q9H4A4	Aminopeptidase B	RNPEP	6587401	18584231	1.41886e+07	1.82535e+07	1.3642e+07	1.79976e+07	3952145	6.24602e+06	11970769	1.43588e+07	1.35552e+06	8.35238e+06	12		22.6513	24.1476	23.7582	24.1217	23.7015	24.1013	21.9142	22.5745	23.513	23.7754	20.3704	22.9938		-0.127054	1.11604	0.557701	1.02172	0.731254	0.969477	-0.36904	-0.0935833	1.18221	1.32206	-1.55755	0.552172	0.442117				-0.145037	1.29354	0.657388	1.19342
P30740	Leukocyte elastase inhibitor	SERPINB1	2.94836e+07	4.39363e+07	5.05905e+07	4.2631e+07	4.6468e+07	3.41707e+07	2.25874e+07	3.79914e+07	1.37411e+07	1.39211e+07	9.85694e+06	9.99423e+06	12		24.8134	25.3889	25.5924	25.3454	25.4697	25.0263	24.429	25.1792	23.712	23.7308	23.2327	23.2527		2.03508	2.35737	2.39184	2.24545	2.49944	1.89444	2.14577	2.51108	1.38119	1.2774	1.30474	0.811079	1.90457				2.32312	2.7323	2.81937	2.62279
P22413	Ectonucleotide pyrophosphatase/phosphodiesterase family member 1	ENPP1	1.47275e+07	1.67804e+07	1.82437e+07	1.87357e+07	1.23794e+07	1.81842e+07	1.21033e+07	1.45399e+07	7.53538e+06	7.98864e+06	1.20608e+07	2.46616e+07	12		23.812	24.0003	24.1209	24.1593	23.5614	24.1162	23.5289	23.7935	22.8452	22.9295	23.5238	24.5558		1.03368	0.968733	0.920369	1.05934	0.591149	0.984358	1.24565	1.12543	0.514447	0.476153	1.59585	2.11418	1.05244				1.17998	1.12281	1.08488	1.23736
O75569	Interferon-inducible double-stranded RNA-dependent protein kinase activator A	PRKRA	2.2299e+07	2.06816e+07	2.423e+07	1.52851e+07	5.30947e+06	1.85948e+07	2.03022e+07	2.87963e+07	1.89904e+07	1.93837e+07	1.60701e+07	1.68134e+07	12		24.4105	24.3018	24.5303	23.8656	22.3401	24.1484	24.2751	24.7794	24.1788	24.2083	23.9379	24.0031		1.63214	1.27031	1.32977	0.76567	-0.630157	1.01657	1.99189	2.11129	1.84797	1.75498	2.00991	1.56152	1.38849				1.86315	1.47235	1.56746	0.894338
P13797	Plastin-3	PLS3	1.47462e+07	1.8904e+07	2.32988e+07	2.03075e+07	2.14596e+07	1.93228e+07	8.24104e+06	1.35757e+07	5.53482e+06	5.90993e+06	4.27972e+06	4.69205e+06	12		23.8138	24.1722	24.4738	24.2755	24.3551	24.2038	22.9744	23.6945	22.4001	22.4947	22.0291	22.1618		1.03551	1.14065	1.27323	1.17556	1.38483	1.07198	0.69115	1.02644	0.0693033	0.0413423	0.101115	-0.279797	0.727608				1.18207	1.32206	1.50081	1.37311
P50226	Sulfotransferase 1A2	SULT1A2	3.06086e+06	3.00247e+06	3.63716e+06	4.00347e+06	3.49446e+06	3.54031e+06	2.00393e+06	1.84928e+06	1.45944e+06	1.74407e+06	1.35643e+06	3.56648e+06	12		21.5455	21.5177	21.7944	21.9328	21.7366	21.7554	20.9344	20.8185	20.477	20.734	20.3714	21.7661		-1.23283	-1.51382	-1.40614	-1.16713	-1.23366	-1.37638	-1.34885	-1.84956	-1.85382	-1.71934	-1.55659	-0.675515	-1.41113				-1.40732	-1.75459	-1.65748	-1.36326
P07305	Histone H1.0	H1F0	1.2948e+08	1.29651e+08	1.70618e+08	1.37675e+08	1.65387e+08	1.21499e+08	1.28401e+08	1.69032e+08	1.58592e+08	1.68724e+08	1.22374e+08	1.46692e+08	12		26.9482	26.9501	27.3462	27.0367	27.3013	26.8564	26.9361	27.3327	27.2407	27.3301	26.8667	27.1282		4.16982	3.91852	4.14567	3.93675	4.33098	3.72455	4.65284	4.66463	4.90994	4.87673	4.93876	4.68663	4.41298				4.76001	4.54175	4.88669	4.5983
Q7L2E3	ATP-dependent RNA helicase DHX30	DHX30	3.22842e+07	1.36893e+07	5.9202e+06	1.75372e+07	4.70962e+07	2.15351e+07	4.80447e+07	3.48679e+07	1.57619e+07	1.87893e+07	3.22182e+07	18871942	12		24.9443	23.7065	22.4972	24.0639	25.4891	24.3602	25.5179	25.0554	23.9099	24.1634	24.9414	24.1697		2.16599	0.675003	-0.70331	0.963971	2.51881	1.22836	3.23463	2.38731	1.57913	1.71004	3.0134	1.72816	1.70846				2.47256	0.78236	-0.829023	1.12596
P02765	Alpha-2-HS-glycoprotein	AHSG	5.34158e+07	4.41633e+07	6.67193e+07	7.69871e+07	6.35323e+07	1.15153e+08	3.40763e+07	3.23642e+07	3.46317e+07	3.84591e+07	3.59613e+07	7.13985e+07	12		25.6708	25.3963	25.9916	26.1981	25.921	26.779	25.0223	24.9479	25.0456	25.1968	25.0999	26.0894		2.89243	2.3648	2.79108	3.09817	2.95069	3.64716	2.73902	2.27981	2.71479	2.74345	3.17197	3.64781	2.9201				3.30182	2.74092	3.28997	3.6188
Q53EP0	Fibronectin type III domain-containing protein 3B	FNDC3B	5.94226e+06	1.15353e+07	1.14673e+07	7.58718e+06	1.35875e+07	1.16316e+07	4.65185e+06	2.79591e+06	1.99816e+06	1.92413e+06	2.28239e+07	2.25832e+06	12		22.5026	23.4596	23.451	22.8551	23.6958	23.4715	22.1494	21.4149	20.9302	20.8758	24.444	21.1068		-0.275753	0.428016	0.250494	-0.244815	0.725487	0.339719	-0.133873	-1.2532	-1.40057	-1.57759	2.51607	-1.33477	-0.163399				-0.314782	0.496091	0.295268	-0.285955
Q96DI7	U5 small nuclear ribonucleoprotein 40 kDa protein	SNRNP40	2.18387e+07	1.98477e+07	1.96221e+07	1.55768e+07	2.29607e+07	1.60938e+07	1.10619e+07	1.54004e+07	1.63801e+07	1.28088e+07	1.07255e+07	1.83669e+07	12		24.3804	24.2425	24.226	23.8929	24.4527	23.94	23.3991	23.8765	23.9654	23.6106	23.3545	24.1306		1.60205	1.21093	1.02545	0.79295	1.48237	0.80818	1.11585	1.20838	1.63464	1.15727	1.42657	1.68902	1.26281				1.8288	1.40353	1.20875	0.926202
P06493	Cyclin-dependent kinase 1	CDK1	5.60213e+07	1.22924e+08	1.6405e+08	1.21643e+08	1.4151e+08	1.13786e+08	3.30732e+07	4.09438e+07	2.65453e+07	3.41348e+07	2.33728e+07	2.01593e+07	12		25.7395	26.8732	27.2896	26.8581	27.0763	26.7618	24.9792	25.2871	24.662	25.0247	24.4783	24.2649		2.96114	3.84166	4.08904	3.75813	4.10603	3.62993	2.69591	2.61905	2.33115	2.57137	2.55036	1.82336	3.08143				3.38025	4.45266	4.81994	4.38967
Q86UE4	Protein LYRIC	MTDH	1.10098e+07	1.9204e+07	1.77963e+07	1.8655e+07	1.35429e+07	1.62717e+07	2.35591e+07	8.44306e+06	1.11977e+07	1.03181e+07	3.08667e+07	29365910	12		23.3923	24.1949	24.0851	24.1531	23.691	23.9559	24.4898	23.0093	23.4167	23.2987	24.8795	24.8076		0.613956	1.16336	0.884549	1.05311	0.720743	0.824044	2.20654	0.341246	1.0859	0.845301	2.95158	2.36605	1.2547				0.700854	1.34839	1.04266	1.23009
Q14137	Ribosome biogenesis protein BOP1	BOP1	4.54901e+06	6.48441e+06	15169812	5.59503e+06	4.56037e+06	6.93043e+06	4.68017e+06	3.69398e+06	4.22532e+06	5.00475e+06	2.55544e+06	5.64518e+06	12		22.1171	22.6285	23.8547	22.4157	22.1207	22.7245	22.1581	21.8167	22.0106	22.2549	21.2851	22.4286		-0.66121	-0.402996	0.654176	-0.684233	-0.849576	-0.407308	-0.125114	-0.851346	-0.320173	-0.1985	-0.64283	-0.0129972	-0.375176				-0.754796	-0.467091	0.771107	-0.799216
P35558	Phosphoenolpyruvate carboxykinase, cytosolic [GTP]	PCK1	9.7118e+06	6.76017e+06	7.68126e+06	7.24024e+06	3.54096e+06	8.45095e+06	5.41394e+06	1.34971e+07	1.45945e+07	1.66306e+07	5.91956e+06	2.06405e+06	12		23.2113	22.6886	22.8729	22.7876	21.7557	23.0107	22.3682	23.6861	23.7989	23.9873	22.4971	20.977		0.432975	-0.342912	-0.327612	-0.312341	-1.21459	-0.121139	0.0850018	1.01806	1.46812	1.53397	0.569088	-1.46454	0.11034				0.494257	-0.397451	-0.386171	-0.364829
O15042	U2 snRNP-associated SURP motif-containing protein	U2SURP	3.288e+07	3.99569e+07	4.04591e+07	3.81731e+07	3.72643e+07	3.83136e+07	8.57223e+06	2.70633e+07	1.14779e+07	11780467	8.56695e+06	1.40809e+07	12		24.9707	25.2519	25.27	25.1861	25.1513	25.1914	23.0312	24.6898	23.4523	23.4899	23.0304	23.7472		2.19237	2.2204	2.06944	2.0861	2.181	2.05953	0.747994	2.02175	1.12155	1.03653	1.10238	1.30565	1.67872				2.50268	2.57355	2.43934	2.43667
P17480	Nucleolar transcription factor 1	UBTF	1.69434e+07	1.4283e+07	1.06975e+07	12726189	1.45503e+07	1.17973e+07	3.79752e+06	7806410	2.35829e+07	1.27528e+07	2.70427e+06	22847933	12		24.0142	23.7678	23.3508	23.6013	23.7945	23.492	21.8566	22.8962	24.4912	23.6043	21.3668	24.4456		1.23589	0.73626	0.150248	0.50135	0.824249	0.360138	-0.426618	0.228139	2.16043	1.15095	-0.561164	2.00398	0.696987				1.41082	0.85336	0.177104	0.585599
P62633	Cellular nucleic acid-binding protein	CNBP	1.72488e+07	1.74224e+07	18038365	1.58047e+07		1.29259e+07	8.14963e+06	1.05111e+07	2.37687e+06	3797690	812394	1.59468e+06	11		24.04	24.0544	24.1046	23.9138		23.6238	22.9583	23.3254	21.1806	21.8567	19.6318	20.6048		1.26166	1.0229	0.904042	0.813902		0.491942	0.675058	0.657321	-1.15017	-0.596676	-2.29615	-1.83675	-0.00480997				1.44023	1.18559	1.06563	0.950675
P48047	ATP synthase subunit O, mitochondrial	ATP5PO	100049108	1.09356e+08	1.45219e+08	1.22e+08	1.24141e+08	1.22936e+08	9.62901e+07	1.09561e+08	1.00622e+08	9.30325e+07	102459852	1.05497e+08	12		26.5761	26.7045	27.1137	26.8623	26.8874	26.8733	26.5209	26.7072	26.5844	26.4712	26.6105	26.6526		3.7978	3.67292	3.91313	3.76236	3.9171	3.74151	4.23764	4.03907	4.25357	4.01787	4.68251	4.21105	4.02054				4.33533	4.25709	4.61258	4.39461
P08240	Signal recognition particle receptor subunit alpha	SRPRA	1.64873e+07	1.90229e+07	2.46807e+07	2.18762e+07	1.03394e+07	5.66398e+06	3.46498e+07	1.42966e+07	1.03761e+07	1.36415e+07	3.00797e+07	1.38571e+07	12		23.9748	24.1812	24.5569	24.3829	23.3017	22.4334	25.0463	23.7692	23.3068	23.7015	24.8423	23.7241		1.19652	1.14969	1.35635	1.28291	0.331361	-0.698437	2.7631	1.10108	0.975957	1.24814	2.91432	1.28253	1.24196				1.36587	1.33255	1.5988	1.4985
Q6PGP7	Tetratricopeptide repeat protein 37	TTC37	1.99271e+07	4.77049e+07	4.54678e+07	4.17188e+07	27904468	3.68218e+07	1.13777e+07	1.73101e+07	1.86845e+07	1.77054e+07	1.04143e+07	1.69596e+07	12		24.2482	25.5076	25.4383	25.3142	24.734	25.1341	23.4397	24.0451	24.1553	24.0777	23.3121	24.0156		1.4699	2.47609	2.23782	2.21425	1.7637	2.00224	1.15646	1.37702	1.82454	1.62432	1.38409	1.57402	1.7587				1.67794	2.86991	2.63782	2.58634
P13073	Cytochrome c oxidase subunit 4 isoform 1, mitochondrial	COX4I1	77715383	6.60717e+07	4.81427e+07	8.0285e+07	6.07152e+07	9.02976e+07	5.91992e+07	6.67451e+07	5.8589e+07	5.10579e+07	5.36962e+07	5.84313e+07	12		26.2117	25.9775	25.5208	26.2586	25.8556	26.4282	25.8191	25.9922	25.8041	25.6056	25.6783	25.8002		3.43336	2.94599	2.32029	3.15868	2.88526	3.29636	3.53583	3.32407	3.47332	3.15227	3.75035	3.35865	3.21954				3.91931	3.41454	2.73503	3.68948
P30613	Pyruvate kinase PKLR	PKLR	1.01908e+07	2.28776e+07	29701498	2.4673e+07	2.52999e+07	2.58782e+07	7.19182e+06	9.46029e+06	5.34072e+06	5.44281e+06	2.72636e+06	3.73887e+06	12		23.2808	24.4474	24.824	24.5564	24.5926	24.6252	22.7779	23.1735	22.3486	22.3759	21.3785	21.8342		0.502437	1.41589	1.62351	1.45648	1.62233	1.49341	0.494681	0.505364	0.0178015	-0.0774448	-0.549423	-0.607414	0.658135				0.573551	1.64109	1.9137	1.70124
P23921	Ribonucleoside-diphosphate reductase large subunit	RRM1	1.87051e+07	1.65664e+07	1.54027e+07	2.04528e+07	5.48785e+06	8.32752e+06	1.69706e+06	1.60207e+07	5.55628e+06	6.23123e+06	2.68903e+06	8.96365e+06	12		24.1569	23.9818	23.8767	24.2858	22.3878	22.9895	20.6946	23.9334	22.4057	22.5711	21.3587	23.0957		1.3786	0.950214	0.676152	1.18585	-0.582486	-0.142366	-1.58864	1.26534	0.0748854	0.117719	-0.569317	0.65407	0.285002				1.57372	1.10134	0.797011	1.38513
Q7L0Y3	tRNA methyltransferase 10 homolog C	TRMT10C	1.7487e+07	1.47213e+07	1.88888e+07	2.05641e+07	2.08465e+07	20526149	12165491	1.59318e+07	18180929	1.49247e+07	1.27617e+07	1.45197e+07	12		24.0598	23.8114	24.171	24.2936	24.3133	24.291	23.5363	23.9254	24.1159	23.8312	23.6053	23.7915		1.28145	0.779858	0.970504	1.19367	1.34301	1.15914	1.25305	1.25732	1.78512	1.37784	1.67734	1.34993	1.28569				1.46282	0.903892	1.14398	1.39427
Q9H3P7	Golgi resident protein GCP60	ACBD3	1.27398e+07	9.33569e+06	1.00613e+07	9.02921e+06	8.16427e+06	5.27563e+06	2.51241e+07	5.26439e+06	3.33928e+06	2.72427e+06	6.13765e+07	5.60076e+06	12		23.6028	23.1543	23.2623	23.1062	22.9609	22.3309	24.5826	22.3278	21.6711	21.3774	25.8712	22.4172		0.82451	0.122786	0.0617848	0.00622101	-0.00940174	-0.80091	2.29932	-0.340256	-0.659699	-1.07593	3.94321	-0.0243926	0.362271				0.941209	0.142315	0.0728285	0.00726643
Q99447	Ethanolamine-phosphate cytidylyltransferase	PCYT2	2.31579e+07	18212908	5.33247e+07	2.2328e+07	1.9307e+07	2.69577e+07	1.90817e+07	19698064	1.60537e+07	1.46097e+07	1.42563e+07	1.5514e+07	12		24.465	24.1185	25.6683	24.4123	24.2026	24.6842	24.1857	24.2316	23.9364	23.8004	23.7651	23.8871		1.68667	1.08692	2.46778	1.3124	1.23233	1.55237	1.90244	1.56346	1.6056	1.34706	1.83713	1.44549	1.58664				1.9254	1.25979	2.90888	1.53294
P05387	60S acidic ribosomal protein P2	RPLP2	1.39898e+08	1.13991e+08	1.31759e+08	1.2564e+08	1.05872e+08	9.46997e+07	7.814e+07	9.94954e+07	5.98434e+07	5.10365e+07	2.13277e+07	31253132	12		27.0598	26.7643	26.9733	26.9047	26.6577	26.4969	26.2196	26.5681	25.8347	25.605	24.3462	24.8975		4.28147	3.7328	3.7728	3.80477	3.68745	3.36504	3.93631	3.90004	3.50389	3.15166	2.41826	2.45591	3.50087				4.88745	4.3265	4.44717	4.44415
Q16576	Histone-binding protein RBBP7	RBBP7	1.39302e+07	2.00031e+07	3.23746e+07	2.32441e+07	1.92404e+07	1.68429e+07	9.50903e+06	9.1872e+06	1.11724e+07	9.25002e+06	8343828	9.69165e+06	12		23.7317	24.2537	24.9484	24.4704	24.1976	24.0056	23.1809	23.1312	23.4134	23.141	22.9923	23.2083		0.953376	1.22218	1.74784	1.37041	1.22734	0.873813	0.897621	0.463105	1.08263	0.687659	1.06431	0.766727	1.02975				1.08831	1.41656	2.06025	1.60071
Q15293	Reticulocalbin-1	RCN1	2.40718e+07	3.26424e+07	3.98774e+07	3.43922e+07	3.32553e+07	3.93132e+07	2.00983e+07	1.65011e+07	1.96925e+07	2.18828e+07	1.78061e+07	1.28564e+07	12		24.5208	24.9602	25.2491	25.0356	24.9871	25.2285	24.2606	23.9761	24.2311	24.3833	24.0859	23.616		1.74251	1.9287	2.04855	1.93563	2.01679	2.09669	1.97733	1.30797	1.90034	1.92993	2.1579	1.1744	1.85139				1.98914	2.23546	2.41471	2.2609
O00566	U3 small nucleolar ribonucleoprotein protein MPP10	MPHOSPH10	1.31315e+07	7.63865e+06	9.14522e+06	7.5911e+06	1.51293e+07	8.03375e+06	8.98232e+06	1.32094e+07	9.151e+06	9.63212e+06	6.49817e+06	1.04719e+07	12		23.6465	22.8649	23.1246	22.8559	23.8508	22.9376	23.0987	23.6551	23.1255	23.1994	22.6316	23.32		0.868192	-0.166653	-0.0759378	-0.244071	0.880543	-0.194179	0.815412	0.986973	0.794696	0.746056	0.703632	0.878432	0.499425				0.991073	-0.193159	-0.0895113	-0.285086
Q9Y277	Voltage-dependent anion-selective channel protein 3	VDAC3	1.10308e+08	4.34264e+07	4.89453e+07	5.1133e+07	1.03055e+08	4.58602e+07	2.36621e+07	7.37626e+07	2.64731e+07	2.78104e+07	2.22386e+07	6.60955e+07	12		26.717	25.3721	25.5447	25.6078	26.6188	25.4507	24.4961	26.1364	24.658	24.7291	24.4066	25.978		3.93863	2.34053	2.34414	2.5078	3.64854	2.31892	2.21283	3.4683	2.32722	2.27576	2.47859	3.53646	2.78314				4.49609	2.71278	2.76315	2.92923
O76031	ATP-dependent Clp protease ATP-binding subunit clpX-like, mitochondrial	CLPX	4.04977e+06	1.32755e+07	1.54487e+07	1.35289e+07	844882	1.51783e+07	2.43519e+07	2.21186e+06	2.70278e+06	1.64211e+06	2.56212e+07	1.25369e+06	12		21.9494	23.6623	23.881	23.6895	19.6884	23.8555	24.5375	21.0768	21.366	20.6471	24.6108	20.2577		-0.828923	0.630722	0.680457	0.589593	-3.2819	0.723684	2.25429	-1.59126	-0.964792	-1.80625	2.68287	-2.18383	-0.257947				-0.946247	0.731036	0.802085	0.688672
Q15392	Delta(24)-sterol reductase	DHCR24	6.27337e+07	7.34767e+07	6.24504e+07	4.25423e+07	6.00129e+07	4.27073e+07	4.99393e+07	60407248	5.52398e+07	4.94648e+07	3.78415e+07	4.85185e+07	12		25.9027	26.1308	25.8962	25.3424	25.8388	25.348	25.5737	25.8482	25.7192	25.5599	25.1735	25.532		3.1244	3.09924	2.69568	2.24245	2.86847	2.21616	3.29043	3.18013	3.3884	3.10653	3.2455	3.09045	2.96232				3.56662	3.59217	3.17752	2.61928
Q15005	Signal peptidase complex subunit 2	SPCS2	3.84355e+07	39790922	5.36693e+07	3.90304e+07	4.56438e+07	3.91136e+07	2.15496e+07	3.48963e+07	2.8697e+07	2.82449e+07	2.70757e+07	3.65968e+07	12		25.1959	25.2459	25.6776	25.2181	25.4439	25.2212	24.3612	25.0566	24.7744	24.7515	24.6905	25.1252		2.4176	2.2144	2.47707	2.11815	2.47362	2.08935	2.07791	2.38848	2.44359	2.29812	2.76253	2.68363	2.37037				2.75979	2.56659	2.91984	2.4741
O76003	Glutaredoxin-3	GLRX3	1.99204e+08	6.41598e+07	7.76504e+07	5.40759e+08	4.16975e+07	5.25116e+08	3.01249e+07	1.69802e+08	1.36816e+08	1.65815e+08	1.84613e+07	3.72279e+08	12		27.5697	25.9352	26.2105	29.0104	25.3135	28.9681	24.8445	27.3393	27.0277	27.305	24.138	28.4718		4.79134	2.90363	3.00997	5.91046	2.34316	5.83624	2.56121	4.67119	4.69686	4.85163	2.21003	6.03023	4.15133				5.46949	3.36544	3.54798	6.90369
Q92620	Pre-mRNA-splicing factor ATP-dependent RNA helicase PRP16	DHX38	5.57241e+06	3.44243e+06	5.60754e+06	5.20678e+06	9.19009e+06	4.07331e+06	4.02203e+06	5.38394e+06	13960036	13461208	4.16072e+06	1.60768e+07	12		22.4099	21.715	22.4189	22.312	23.1316	21.9578	21.9395	22.3602	23.7348	23.6823	21.9884	23.9385		-0.368463	-1.31654	-0.781586	-0.787987	0.161354	-1.17405	-0.343753	-0.307859	1.404	1.22894	0.0604335	1.49689	-0.0607194				-0.420614	-1.52594	-0.921291	-0.920406
Q99733	Nucleosome assembly protein 1-like 4	NAP1L4	74336021	8.74371e+07	7.43706e+07	8.82935e+07	8.52324e+07	9.09277e+07	4.15893e+07	5.70176e+07	44128377	4.16813e+07	32770960	4.17256e+07	12		26.1476	26.3817	26.1482	26.3958	26.3449	26.4382	25.3097	25.7649	25.3952	25.3129	24.9659	25.3144		3.36923	3.3502	2.94771	3.29586	3.3746	3.30639	3.02647	3.09682	3.0644	2.85953	3.03795	2.87285	3.1335				3.8461	3.88304	3.47459	3.84971
P49916	DNA ligase 3	LIG3	1.58106e+07	15291618	2.05547e+07	1.82186e+07	1.87897e+07	1.53837e+07	8.14455e+06	1.61002e+07	9.44367e+06	1.19269e+07	9.24167e+06	1.14484e+07	12		23.9144	23.8662	24.293	24.1189	24.1634	23.8749	22.9574	23.9406	23.1709	23.5077	23.1397	23.4486		1.13606	0.834698	1.09244	1.01896	1.19314	0.743082	0.674158	1.27249	0.840114	1.05436	1.21175	1.00706	1.00653				1.29685	0.967455	1.28771	1.19019
P21281	V-type proton ATPase subunit B, brain isoform	ATP6V1B2	3.90751e+07	3.42694e+07	3.61263e+07	3.63623e+07	2.00484e+07	3.59919e+07	1.15262e+07	3.72533e+07	28727021	2.89392e+07	1.45822e+07	2.4377e+07	12		25.2197	25.0304	25.1065	25.1159	24.257	25.1012	23.4584	25.1509	24.7759	24.7865	23.7977	24.539		2.44142	1.99888	1.90602	2.01599	1.28669	1.96935	1.17517	2.48278	2.4451	2.33315	1.86973	2.09743	2.00181				2.78697	2.31679	2.24672	2.35477
P09104	Gamma-enolase	ENO2	3.28254e+07	2.71995e+07	2.54656e+07	2.82081e+07	4.29451e+07	2.94001e+07	1.55784e+08	3.63279e+07	1.21811e+08	2.1491e+07	5.13165e+07	1.98289e+07	12		24.9683	24.6971	24.602	24.7496	25.356	24.8093	27.215	25.1146	26.8601	24.3572	25.6129	24.2411		2.18998	1.66554	1.40152	1.64966	2.38569	1.6775	4.93172	2.44649	4.52926	1.90386	3.68495	1.79952	2.52214				2.49994	1.93043	1.65204	1.92687
Q5SRE5	Nucleoporin NUP188 homolog	NUP188	3.28773e+06	2.81134e+06	2.91118e+06	3.29323e+06	3.99429e+06	1.59223e+06	9.14195e+06	2.66463e+06	3.49957e+06	3.36227e+06	8.19503e+06	3.8783e+06	12		21.6487	21.4228	21.4732	21.6511	21.9295	20.6026	23.1241	21.3455	21.7387	21.681	22.9663	21.887		-1.12967	-1.60871	-1.72735	-1.44888	-1.04079	-2.52921	0.840826	-1.32259	-0.592058	-0.772362	1.03835	-0.554592	-0.903919				-1.28956	-1.86457	-2.03611	-1.69235
Q96CS3	FAS-associated factor 2	FAF2	1.04353e+07	1.23367e+07	1.35221e+07	1.34207e+07	9.38248e+06	1.39101e+07	1.89103e+07	7.96778e+06	8.41974e+06	1.2305e+07	1.84298e+07	9.40191e+06	12		23.315	23.5564	23.6888	23.678	23.1615	23.7296	24.1727	22.9257	23.0053	23.5527	24.1355	23.1645		0.536634	0.524909	0.488295	0.578013	0.191244	0.597807	1.88943	0.257657	0.674542	1.09938	2.20757	0.722939	0.814034				0.612588	0.608394	0.575575	0.675146
Q14157	Ubiquitin-associated protein 2-like	UBAP2L	6.46498e+06	2.28292e+07	2.86663e+07	2.31317e+07	1.9856e+07	2.32772e+07	7.06292e+06	6.60054e+06	4.96754e+06	6.20006e+06	8.90368e+06	8.79097e+06	12		22.6242	24.4444	24.7729	24.4634	24.2431	24.4724	22.7518	22.6542	22.2441	22.5638	23.086	23.0676		-0.154118	1.41284	1.57233	1.36342	1.27278	1.34059	0.468589	-0.0139369	-0.0867011	0.110483	1.158	0.626006	0.755857				-0.175932	1.63755	1.85338	1.59254
P46977	Dolichyl-diphosphooligosaccharide--protein glycosyltransferase subunit STT3A	STT3A	5.87534e+07	4.62074e+07	5.46818e+07	3.9757e+07	2.4396e+07	5.33595e+07	1.00517e+07	4.66448e+07	2.82194e+07	2.85339e+07	8.93056e+06	4.40084e+07	12		25.8082	25.4616	25.7046	25.2447	24.5401	25.6692	23.2609	25.4752	24.7502	24.7662	23.0903	25.3913		3.02984	2.43008	2.50403	2.14476	1.56985	2.53742	0.977688	2.80712	2.41938	2.31281	1.16235	2.94969	2.23708				3.45867	2.81658	2.95162	2.50518
P22061	Protein-L-isoaspartate(D-aspartate) O-methyltransferase	PCMT1	7.3521e+07	6.73062e+07	3.35628e+07	6.57407e+07	1.72991e+08	2.06778e+08	7.05445e+07	3.47443e+07	1.02942e+08	1.57862e+08	1.23609e+08	1.58037e+08	12		26.1317	26.0042	25.0004	25.9703	27.3661	27.6235	26.072	25.0503	26.6173	27.2341	26.8812	27.2357		3.35332	2.9727	1.79984	2.87034	4.39583	4.49169	3.78879	2.38218	4.28645	4.78072	4.95324	4.7941	3.7391				3.82794	3.44549	2.12155	3.35269
Q9UGP8	Translocation protein SEC63 homolog	SEC63	2.40359e+07	4.59298e+07	5.01374e+07	4.84073e+07	5.39298e+07	4.73743e+07	8.73725e+06	1.87871e+07	6.96777e+06	7824625	1.06666e+07	1.09634e+07	12		24.5187	25.4529	25.5794	25.5287	25.6846	25.4976	23.0587	24.1632	22.7323	22.8996	23.3466	23.3862		1.74036	2.42139	2.37886	2.42877	2.71428	2.36578	0.775502	1.49515	0.401462	0.446224	1.41863	0.944606	1.62758				1.98668	2.8065	2.80407	2.83692
Q8IWZ3	Ankyrin repeat and KH domain-containing protein 1	ANKHD1	3.93249e+06	6.62957e+06	5935570	9.11147e+06	1.51094e+06	6.47556e+06	1.47187e+06	2.3593e+07	2.0016e+07	2.44636e+07	1.42947e+06	2.77463e+07	12		21.907	22.6605	22.501	23.1193	20.527	22.6266	20.4892	24.4919	24.2547	24.5441	20.447	24.7258		-0.871321	-0.371055	-0.699568	0.0193054	-2.44328	-0.505247	-1.79402	1.82376	1.92385	2.09077	-1.48092	2.28421	-0.00195972				-0.994646	-0.43007	-0.824613	0.0225496
O75400	Pre-mRNA-processing factor 40 homolog A	PRPF40A	1.83718e+07	2.01481e+07	2.77217e+07	2.63265e+07	2.17074e+07	2.46344e+07	1.2608e+07	1.90495e+07	1.20061e+07	1.63812e+07	1.25331e+07	1.57182e+07	12		24.131	24.2641	24.7245	24.65	24.3717	24.5542	23.5878	24.1833	23.5173	23.9655	23.5792	23.9059		1.35266	1.2326	1.52399	1.55006	1.40139	1.42235	1.30459	1.51516	1.18647	1.51217	1.65127	1.46435	1.42642				1.54411	1.42865	1.79639	1.81055
P22392	Nucleoside diphosphate kinase B	NME2	1.0778e+08	115072188	1.77344e+08	1.60465e+08	1.01426e+08	1.49048e+08	8.72189e+07	1.04596e+08	2.45002e+07	2.90437e+07	1.64151e+07	2.11545e+07	12		26.6835	26.778	27.402	27.2577	26.5959	27.1512	26.3781	26.6402	24.5463	24.7917	23.9685	24.3345		3.90518	3.74642	4.20145	4.15773	3.62556	4.01938	4.09489	3.97216	2.21549	2.33836	2.04055	1.89287	3.35084				4.4579	4.34228	4.95244	4.85642
Q13098	COP9 signalosome complex subunit 1	GPS1	7.38562e+06	4.72775e+06	4.74335e+06	8.87232e+06	3.19543e+06	9.98181e+06	8.34879e+06	3.74777e+06	9.36984e+06	8.63818e+06	4.08249e+06	3.61115e+06	12		22.8163	22.1727	22.1775	23.0809	21.6076	23.2509	22.9931	21.8376	23.1596	23.0423	21.961	21.784		0.0379552	-0.858818	-1.02305	-0.0190677	-1.36272	0.119048	0.709891	-0.830488	0.82879	0.58893	0.03305	-0.657558	-0.202836				0.0433273	-0.99541	-1.20591	-0.022272
Q8TCS8	Polyribonucleotide nucleotidyltransferase 1, mitochondrial	PNPT1	6.12059e+07	6.55707e+07	9.37338e+07	5.61377e+07	5.96203e+07	7.67652e+07	8.57849e+06	4.84898e+07	4.89873e+07	6.397e+07	9.3594e+06	5.94635e+07	12		25.8672	25.9665	26.4821	25.7425	25.8293	26.1939	23.0323	25.5312	25.5459	25.9309	23.158	25.8255		3.08883	2.93501	3.28154	2.64252	2.85901	3.06213	0.749048	2.86309	3.2151	3.47753	1.23001	3.38392	2.73231				3.52602	3.40181	3.8681	3.08658
Q9UHD1	Cysteine and histidine-rich domain-containing protein 1	CHORDC1	1.5543e+07	2.04299e+07	3.18091e+07	1.62209e+07	1.19794e+07	2.30466e+07	8.15646e+06	1.20884e+07	4.77603e+06	5.31477e+06	2.87121e+06	6.78813e+06	12		23.8898	24.2842	24.9229	23.9513	23.5141	24.458	22.9595	23.5271	22.1874	22.3416	21.4532	22.6946		1.11143	1.25264	1.72241	0.851399	0.543764	1.32623	0.676266	0.85903	-0.143423	-0.111791	-0.474742	0.252999	0.655517				1.26873	1.45187	2.03029	0.994473
Q8WTT2	Nucleolar complex protein 3 homolog	NOC3L	11290577	4.53773e+07	1.97538e+07	2.34315e+07	3.74883e+07	22947476	4.34085e+06	1.49994e+07	6.88813e+06	1.06028e+07	5.73259e+06	8.7858e+06	12		23.4286	25.4355	24.2356	24.4819	25.1599	24.4518	22.0495	23.8384	22.7157	23.3379	22.4508	23.0667		0.650283	2.40393	1.03511	1.382	2.18964	1.32001	-0.233697	1.17031	0.384878	0.884572	0.522788	0.625159	1.02791				0.742323	2.78626	1.22013	1.61424
P36957	Dihydrolipoyllysine-residue succinyltransferase component of 2-oxoglutarate dehydrogenase complex, mitochondrial	DLST	3.2118e+07	55423572	6.25369e+07	5.55771e+07	31033816	5.458e+07	2.79857e+07	3.29589e+07	3.30274e+07	3.31955e+07	2.71557e+07	3.35457e+07	12		24.9369	25.724	25.8982	25.728	24.8873	25.7019	24.7382	24.9742	24.9772	24.9845	24.6948	24.9996		2.15855	2.69246	2.69768	2.62804	1.91704	2.57005	2.45494	2.30607	2.64636	2.53112	2.76678	2.55804	2.49393				2.46406	3.12068	3.17988	3.06967
O14579	Coatomer subunit epsilon	COPE	2.34719e+07	3.45287e+07	2.74104e+07	3.67074e+07	4.64216e+07	3.74496e+07	7.87703e+06	2.35621e+07	1.00096e+07	1.3124e+07	1.00251e+07	1.01865e+07	12		24.4844	25.0413	24.7082	25.1296	25.4683	25.1584	22.9092	24.49	23.2549	23.6457	23.2571	23.2802		1.7061	2.00975	1.5077	2.02962	2.498	2.02662	0.625976	1.82187	0.924084	1.19234	1.32915	0.838576	1.54248				1.94757	2.3294	1.77719	2.37069
Q14978	Nucleolar and coiled-body phosphoprotein 1	NOLC1	2.15067e+07	2.39433e+07	2.07808e+07	2.12547e+07	1.8576e+07	2.23048e+07	1.56897e+07	2.46365e+07	20814727	1.96095e+07	1.14662e+07	1.6761e+07	12		24.3583	24.5131	24.3088	24.3413	24.1469	24.4109	23.9033	24.5543	24.3111	24.225	23.4509	23.9986		1.57995	1.48158	1.10823	1.24133	1.17664	1.27903	1.62007	1.8862	1.9803	1.77168	1.52292	1.55702	1.51708				1.80358	1.71722	1.30632	1.44993
Q9H6R4	Nucleolar protein 6	NOL6	8.35443e+06	6.59611e+06	1.46093e+07	8.81351e+06	7.78409e+06	7.34334e+06	3.35838e+06	6.96094e+06	5.77134e+06	7.07904e+06	4.93152e+06	6.24947e+06	12		22.9941	22.6532	23.8004	23.0713	22.8921	22.808	21.6793	22.7309	22.4605	22.7551	22.2336	22.5753		0.215778	-0.378356	0.599856	-0.0286625	-0.0781979	-0.323817	-0.603912	0.062761	0.129672	0.301755	0.305631	0.133717	0.0280188				0.246319	-0.438532	0.707077	-0.0334791
Q13011	Delta(3,5)-Delta(2,4)-dienoyl-CoA isomerase, mitochondrial	ECH1	4.29287e+07	6.39195e+07	7.25135e+07	77059180	8.35931e+07	7.44849e+07	3.43949e+07	4.83499e+07	3.96081e+07	5.07669e+07	2.49604e+07	33349884	12		25.3554	25.9298	26.1117	26.1995	26.3169	26.1504	25.0357	25.527	25.2393	25.5974	24.5731	24.9912		2.57711	2.89821	2.91122	3.09952	3.34659	3.01862	2.75245	2.85892	2.90849	3.14402	2.64517	2.54959	2.89249				2.94186	3.35917	3.43159	3.62038
Q16795	NADH dehydrogenase [ubiquinone] 1 alpha subcomplex subunit 9, mitochondrial	NDUFA9	3.90079e+07	8.17923e+07	7.87829e+07	8.31266e+07	7.65099e+07	7.55839e+07	9.60093e+06	4.77214e+07	1.62173e+07	1.83835e+07	1.16518e+07	1.513e+07	12		25.2173	26.2855	26.2314	26.3088	26.1891	26.1716	23.1947	25.5081	23.951	24.1319	23.474	23.8509		2.43893	3.25392	3.03086	3.20886	3.21885	3.03975	0.911499	2.84004	1.62023	1.67854	1.54607	1.40932	2.34974				2.78413	3.77145	3.57261	3.74809
Q03154	Aminoacylase-1	ACY1	3.86103e+07	4.43836e+07	6.19638e+07	4.96682e+07	5.15783e+07	4.95096e+07	2.58676e+07	4.15819e+07	3.24624e+07	3.46133e+07	2.08097e+07	4.59174e+07	12		25.2025	25.4035	25.8849	25.5658	25.6203	25.5612	24.6246	25.3095	24.9523	25.0448	24.3108	25.4525		2.42415	2.37199	2.6844	2.46587	2.64997	2.42938	2.3414	2.64136	2.62146	2.59146	2.38278	3.01095	2.55126				2.76726	2.74924	3.16422	2.88025
Q8TDD1	ATP-dependent RNA helicase DDX54	DDX54	2.89701e+07	2.68014e+08	2.98915e+08	2.25214e+08	3.87927e+07	2.30667e+08	5.84602e+07	2.80629e+07	1.0929e+07	1.22796e+07	684808	1.66236e+07	12		24.7881	27.9977	28.1552	27.7467	25.2093	27.7812	25.801	24.7422	23.3817	23.5498	19.3853	23.9867		2.00973	4.96619	4.95464	4.64677	2.23899	4.64941	3.51771	2.07407	1.05085	1.09639	-2.54263	1.54514	2.51727				2.29418	5.75605	5.84025	5.42765
P50502	Hsc70-interacting protein	ST13	5.95201e+07	6.21597e+07	7.74547e+07	5.90635e+07	6.90473e+07	8.01384e+07	3.53706e+07	4.89152e+07	1.54904e+07	16756098	1.93585e+07	1.39956e+07	12		25.8269	25.8895	26.2068	25.8158	26.0411	26.256	25.076	25.5438	23.8849	23.9982	24.2065	23.7385		3.04854	2.85794	3.00633	2.71582	3.07079	3.12417	2.7928	2.87569	1.55407	1.54482	2.2785	1.29689	2.51386				3.48002	3.31248	3.54369	3.1722
P29692	Elongation factor 1-delta	EEF1D	8.38509e+07	6.43559e+07	8.36733e+07	6.00745e+07	8.49764e+07	5.56969e+07	5.05625e+07	7.5982e+07	4.56269e+07	49074443	3.02448e+07	4.60683e+07	12		26.3213	25.9396	26.3183	25.8402	26.3406	25.7311	25.5916	26.1792	25.4434	25.5485	24.8502	25.4573		3.54299	2.90803	3.11774	2.7403	3.37027	2.59927	3.30832	3.51107	3.11258	3.0951	2.92221	3.01569	3.10363				4.04446	3.37054	3.67502	3.2008
P16930	Fumarylacetoacetase	FAH	4.14108e+07	5.33251e+07	7.23682e+07	1.47828e+08	5.41386e+07	6.97536e+07	3.64651e+07	4.58152e+07	2.49743e+07	2.59548e+07	1.63718e+07	1.83953e+07	12		25.3035	25.6683	26.1089	27.1393	25.6902	26.0558	25.12	25.4493	24.5739	24.6295	23.9647	24.1328		2.52517	2.63677	2.90833	4.0394	2.71986	2.92394	2.83677	2.78124	2.24314	2.17613	2.03674	1.69125	2.62656				2.88258	3.05614	3.42818	4.7182
P11169	Solute carrier family 2, facilitated glucose transporter member 3	SLC2A3	7.28056e+07	8.66585e+07	1.38019e+08	1.00386e+08	1.23744e+08	1.26948e+08	6.5369e+07	8.43392e+07	8.39607e+07	96672910	9.16278e+07	1.10098e+08	12		26.1175	26.3688	27.0403	26.581	26.8828	26.9197	25.9621	26.3297	26.3232	26.5266	26.4493	26.7142		3.33921	3.3373	3.83977	3.48104	3.91249	3.78784	3.67886	3.66161	3.99241	4.07324	4.52131	4.27263	3.82481				3.81184	3.86809	4.52611	4.06602
Q8WVV9	Heterogeneous nuclear ribonucleoprotein L-like	HNRNPLL	2.11218e+07	1.95755e+07	2.18371e+07	2.09428e+07	20994564	2.09301e+07	7.29668e+06	1.1449e+07	6.70021e+06	7839171	7.12979e+06	8.15156e+06	12		24.3322	24.2225	24.3803	24.3199	24.3235	24.3191	22.7988	23.4487	22.6758	22.9023	22.7654	22.9586		1.5539	1.19101	1.17975	1.22	1.35322	1.18725	0.515565	0.780627	0.344971	0.448903	0.83746	0.51706	0.927476				1.77383	1.38043	1.39063	1.42502
Q9UI10	Translation initiation factor eIF-2B subunit delta	EIF2B4	5.02102e+06	9.90294e+06	9.08834e+06	1.12828e+07	5.09073e+06	8.26961e+06	4.26102e+06	5.68287e+06	3.78297e+06	1.5014e+07	3.23935e+06	5.85967e+06	12		22.2596	23.2394	23.1156	23.4276	22.2794	22.9794	22.0228	22.4382	21.8511	23.8398	21.6273	22.4824		-0.518782	0.207885	-0.0849382	0.327679	-0.690852	-0.152433	-0.260477	-0.229901	-0.479713	1.38644	-0.300695	0.040804	-0.0629155				-0.592209	0.240949	-0.10012	0.382744
Q13162	Peroxiredoxin-4	PRDX4	4.12961e+07	6.41639e+07	6.41714e+07	5.75426e+07	4.66431e+07	5.44238e+07	3.94449e+07	5.01095e+07	2.65341e+07	3.09343e+07	2.19575e+07	2.04346e+07	12		25.2995	25.9353	25.9354	25.7781	25.4752	25.6977	25.2333	25.5786	24.6613	24.8827	24.3882	24.2845		2.52117	2.90372	2.7349	2.67818	2.50487	2.56591	2.95009	2.91049	2.33054	2.42934	2.46024	1.84293	2.56936				2.87801	3.36555	3.22375	3.12824
P04899	Guanine nucleotide-binding protein G(i) subunit alpha-2	GNAI2	3.9296e+07	3.74103e+07	3.64489e+07	4.12754e+07	3.16809e+07	3.85703e+07	3.91849e+07	3.96409e+07	4.27363e+07	5.39894e+07	3.67872e+07	5.42712e+07	12		25.2279	25.1569	25.1194	25.2988	24.9171	25.201	25.2238	25.2405	25.349	25.6862	25.1327	25.6937		2.44955	2.12539	1.91885	2.19883	1.94681	2.06917	2.94055	2.5724	3.01816	3.23281	3.20473	3.2521	2.57745				2.79625	2.46343	2.26183	2.56834
Q10570	Cleavage and polyadenylation specificity factor subunit 1	CPSF1	1.1401e+07	1.05563e+07	1.18728e+07	9.74992e+06	1.31134e+07	13037205	4.26803e+06	1.90258e+07	1.20683e+07	1.27252e+07	3.64765e+06	1.16598e+07	12		23.4427	23.3316	23.5012	23.217	23.6445	23.6361	22.0251	24.1815	23.5247	23.6012	21.7985	23.475		0.664325	0.300068	0.300628	0.117012	0.674245	0.50431	-0.258107	1.51337	1.19392	1.14782	-0.129433	1.03345	0.588466				0.758352	0.347793	0.354364	0.136675
Q9UBV2	Protein sel-1 homolog 1	SEL1L	1.51879e+07	2.06973e+07	2.00203e+07	1.8665e+07	2.3806e+07	1.79065e+07	1.38875e+07	9.11089e+06	9.50331e+06	9.18815e+06	1.14221e+07	8.93184e+06	12		23.8564	24.3029	24.255	24.1538	24.5048	24.094	23.7273	23.1192	23.18	23.1313	23.4453	23.0905		1.07808	1.2714	1.05444	1.05388	1.53453	0.962163	1.44404	0.451071	0.849196	0.677977	1.51736	0.648942	1.04526				1.23067	1.47361	1.24291	1.23099
Q92797	Symplekin	SYMPK	4.51908e+07	4.5866e+07	4.29915e+07	42948061	4.81059e+07	6.61081e+07	5.20343e+06	9.26355e+06	1.71796e+07	2.19789e+07	4.54301e+06	4.51768e+07	12		25.4295	25.4509	25.3575	25.3561	25.5197	25.9783	22.311	23.1431	24.0342	24.3896	22.1152	25.4291		2.65119	2.41938	2.15703	2.25614	2.54942	2.8465	0.0277867	0.475044	1.70339	1.93625	0.187249	2.98749	1.84974				3.02643	2.80418	2.54258	2.63528
Q9Y5X3	Sorting nexin-5	SNX5	3.6371e+07	4.30909e+07	5.11367e+07	4.67487e+07	3.268e+07	3.93166e+07	1.18522e+07	2.71746e+07	2.44651e+07	2.08702e+07	8.22484e+06	2.93486e+07	12		25.1163	25.3609	25.6079	25.4784	24.9619	25.2286	23.4987	24.6958	24.5442	24.3149	22.9716	24.8068		2.33795	2.32934	2.40733	2.37848	1.99161	2.09682	1.21541	2.02767	2.21342	1.86157	1.04359	2.3652	2.02237				2.66886	2.69981	2.83763	2.77817
P49189	4-trimethylaminobutyraldehyde dehydrogenase	ALDH9A1	1.45665e+07	1.27391e+07	1.90587e+07	1.52502e+07	1.30415e+07	2.4267e+07	3.57218e+07	8.89469e+06	1.16048e+07	1.32065e+07	4.75946e+07	11187505	12		23.7962	23.6028	24.1839	23.8623	23.6366	24.5325	25.0903	23.0845	23.4682	23.6547	25.5043	23.4154		1.01782	0.571222	0.983424	0.762379	0.666312	1.40067	2.80706	0.416423	1.13742	1.20138	3.57633	0.973801	1.29285				1.16188	0.662073	1.15921	0.890494
P00491	Purine nucleoside phosphorylase	PNP	1.15575e+07	2.13816e+07	2.51885e+07	1.883e+07	1.989e+07	1.90271e+07	1.88836e+07	1.92122e+07	1.26416e+07	1.34309e+07	3.4114e+06	5.30299e+06	12		23.4623	24.3499	24.5863	24.1665	24.2455	24.1816	24.1706	24.1955	23.5917	23.6791	21.7019	22.3384		0.683989	1.31833	1.38574	1.06658	1.27525	1.04973	1.88739	1.52743	1.26087	1.22569	-0.226038	-0.10321	1.02931				0.780799	1.528	1.63343	1.24582
Q9UBS4	DnaJ homolog subfamily B member 11	DNAJB11	2.74213e+07	2.09587e+07	3.51206e+07	1.88166e+07	4.27203e+06	3.68317e+07	1.47236e+07	2.45215e+07	15091924	3.01386e+07	9.85013e+06	2.86737e+07	12		24.7088	24.321	25.0658	24.1655	22.0265	25.1344	23.8116	24.5475	23.8473	24.8451	23.2317	24.7732		1.93046	1.2895	1.86529	1.06555	-0.943803	2.00262	1.52838	1.87946	1.51647	2.39174	1.30374	2.33164	1.51342				2.20369	1.4946	2.1987	1.24461
O00429	Dynamin-1-like protein	DNM1L	8.40478e+06	20852764	2.13234e+07	2.32507e+07	1.63814e+07	2.47257e+07	3.37083e+06	1.11542e+07	8.72306e+06	9.05685e+06	2.87178e+06	9.35398e+06	12		23.0028	24.3137	24.3459	24.4708	23.9656	24.5595	21.6847	23.4111	23.0564	23.1106	21.4535	23.1571		0.224445	1.2822	1.14541	1.37083	0.995259	1.42769	-0.598573	0.742989	0.725601	0.657212	-0.474456	0.715565	0.684513				0.256213	1.48613	1.35015	1.60119
O00154	Cytosolic acyl coenzyme A thioester hydrolase	ACOT7	7.44934e+07	1.18321e+08	5.10625e+07	9.5944e+07	4.1966e+07	9.42893e+07	6.90647e+07	6.5638e+07	6.21333e+07	7.97881e+07	5.17907e+07	6.50422e+07	12		26.1506	26.8181	25.6058	26.5157	25.3227	26.4906	26.0414	25.968	25.8889	26.2497	25.6262	25.9549		3.37228	3.7866	2.40524	3.41574	2.35242	3.35877	3.7582	3.29994	3.55806	3.7963	3.69822	3.51329	3.35959				3.84958	4.38884	2.83516	3.98974
Q9Y450	HBS1-like protein	HBS1L	2.12578e+07	2.03829e+07	3.27004e+07	3.67356e+07	2.28801e+07	3.55756e+07	3.73857e+06	1.81202e+07	3.32193e+06	3.23417e+06	3.70065e+06	3.4911e+06	12		24.3415	24.2809	24.9628	25.1307	24.4476	25.0844	21.8341	24.1111	21.6636	21.625	21.8193	21.7352		1.56316	1.24931	1.76228	2.03073	1.4773	1.95256	-0.44919	1.443	-0.66721	-0.828401	-0.108621	-0.706334	0.726549				1.7844	1.44801	2.07728	2.37198
Q96N67	Dedicator of cytokinesis protein 7	DOCK7	2.25275e+07	9.95173e+06	2.75975e+06	1.07927e+07	3.09832e+07	1.66652e+06	2.43432e+06	2.25808e+07	2.3663e+07	2.87546e+07	2.36156e+06	3.42631e+07	12		24.4252	23.2465	21.3961	23.3635	24.885	20.6684	21.2151	24.4286	24.4961	24.7773	21.1713	25.0302		1.64685	0.214976	-1.80442	0.263598	1.91469	-2.46341	-1.06815	1.76051	2.16533	2.32392	-0.756663	2.58857	0.565483				1.87994	0.249167	-2.12695	0.307895
Q8WYP5	Protein ELYS	AHCTF1	4.43602e+07	5.92361e+07	5.69552e+07	88834259	6.52856e+07	85150576	5.56331e+06	2.51923e+06	3.00905e+06	1.7434e+06	2.11568e+06	1.45412e+06	12		25.4028	25.82	25.7633	26.4046	25.9603	26.3435	22.4075	21.2645	21.5209	20.7335	21.0127	20.4717		2.62443	2.78843	2.5628	3.30467	2.98997	3.21169	0.124267	-1.40354	-0.809928	-1.7199	-0.91528	-1.96987	0.898978				2.99588	3.23193	3.02089	3.86
A0FGR8	Extended synaptotagmin-2	ESYT2	9.2693e+06	3.07483e+07	2.52961e+07	2.62099e+07	3.20672e+07	3.95333e+07	4.8092e+06	7.49635e+06	6.27872e+06	6.50769e+06	8.93131e+06	5.03491e+06	12		23.144	24.874	24.5924	24.6436	24.9346	25.2366	22.1974	22.8378	22.582	22.6337	23.0904	22.2635		0.365697	1.84246	1.39189	1.54366	1.9643	2.10474	-0.0858791	0.169669	0.251237	0.180347	1.16247	-0.17805	0.892712				0.417456	2.1355	1.64068	1.80307
Q9UH99	SUN domain-containing protein 2	SUN2	8.67476e+06	3.04707e+07	3.12885e+07	26382856	2.62118e+07	1.86406e+07	2.95056e+06	4.15283e+06	6.83322e+06	6.69531e+06	6.01438e+06	7.72158e+06	12		23.0484	24.8609	24.8991	24.6531	24.6437	24.1519	21.4926	21.9857	22.7041	22.6747	22.52	22.8805		0.270059	1.82938	1.69861	1.55315	1.67342	1.02012	-0.790688	-0.682426	0.373333	0.221354	0.592014	0.43888	0.6831				0.308283	2.12034	2.00222	1.81415
Q13308	Inactive tyrosine-protein kinase 7	PTK7	9.54427e+06	3.60777e+06	1.59172e+06	1.77818e+06	2.38084e+06	2.03321e+06	3.92187e+06	4.95522e+06	2.42594e+06	4.15122e+06	2.38587e+06	3.64345e+06	12		23.1862	21.7827	20.6022	20.762	21.183	20.9553	21.9031	22.2405	21.2101	21.9851	21.1861	21.7969		0.407871	-1.24886	-2.59837	-2.33797	-1.78725	-2.1765	-0.380136	-0.42757	-1.12069	-0.468263	-0.741884	-0.644709	-1.12703				0.4656	-1.44749	-3.06281	-2.73086
P51532	Transcription activator BRG1	SMARCA4	4.10336e+07	3.60931e+07	5.55163e+07	5.23702e+07	3.67123e+07	4.91589e+07	2.76527e+07	3.82427e+07	6.08543e+07	6.492e+07	2.79021e+07	7.42822e+07	12		25.2903	25.1052	25.7264	25.6422	25.1298	25.5509	24.7209	25.1887	25.8589	25.9522	24.7339	26.1465		2.51197	2.07368	2.52588	2.54229	2.15947	2.41913	2.43767	2.52059	3.52805	3.49879	2.8059	3.70493	2.72736				2.86751	2.40349	2.97737	2.96952
P05121	Plasminogen activator inhibitor 1	SERPINE1	6.99983e+07	9.94751e+07	1.27528e+08	8.99419e+07	1.19678e+08	1.04374e+08	2.0106e+07	5.41995e+07	3.41938e+07	6.05114e+07	2.02735e+07	7.89415e+07	12		26.0608	26.5678	26.9262	26.4225	26.8346	26.6372	24.2611	25.6918	25.0272	25.8507	24.2731	26.2343		3.28248	3.53629	3.72571	3.32254	3.86429	3.50536	1.97788	3.02369	2.69643	3.39734	2.34512	3.7927	3.20582				3.74708	4.09873	4.39167	3.88088
Q5SSJ5	Heterochromatin protein 1-binding protein 3	HP1BP3	1.02844e+08	1.03981e+08	1.11932e+08	1.04241e+08	1.2363e+08	1.17851e+08	4.56176e+07	8.04724e+07	6.4866e+07	6.42181e+07	2.27339e+07	5.83598e+07	12		26.6159	26.6318	26.738	26.6353	26.8814	26.8124	25.4431	26.262	25.951	25.9365	24.4383	25.7985		3.83755	3.60021	3.53753	3.5354	3.91115	3.68057	3.15984	3.5939	3.62016	3.48311	2.51037	3.35689	3.48556				4.3807	4.17282	4.16984	4.12951
Q9BPW8	Protein NipSnap homolog 1	NIPSNAP1	8.6849e+07	8.41016e+07	1.05889e+08	9.85784e+07	1.23127e+08	9.46931e+07	7.25893e+07	7.53041e+07	6.36481e+07	7.52355e+07	4.67826e+07	8.30122e+07	12		26.372	26.3256	26.658	26.5548	26.8756	26.4968	26.1133	26.1662	25.9236	26.1649	25.4795	26.3068		3.59367	3.29409	3.45746	3.45482	3.90527	3.36493	3.83001	3.49814	3.59281	3.71154	3.5515	3.86524	3.59329				4.10231	3.81801	4.07546	4.03539
P43034	Platelet-activating factor acetylhydrolase IB subunit alpha	PAFAH1B1	1.97987e+07	2.15766e+07	1.16895e+07	1.99602e+07	1.91784e+07	2.10358e+07	3.81985e+06	7.20193e+06	4.27057e+06	6.03688e+06	2268796	4.08546e+06	12		24.2389	24.363	23.4787	24.2506	24.193	24.3263	21.8651	22.78	22.026	22.5254	21.1135	21.9621		1.46057	1.33142	0.278182	1.15067	1.22268	1.19452	-0.418161	0.111863	-0.304804	0.0720055	-0.814474	-0.479517	0.400414				1.6673	1.54318	0.327905	1.34404
Q6NUQ4	Transmembrane protein 214	TMEM214	2.9735e+07	39654288	5.82844e+07	49808479	3.10321e+07	7.00709e+07	2.61338e+07	3.55762e+07	8.39109e+06	8.77316e+06	2.19562e+07	8.15354e+06	12		24.8257	25.241	25.7966	25.5699	24.8873	26.0623	24.6394	25.0844	23.0004	23.0647	24.3881	22.959		2.04733	2.20943	2.59608	2.46994	1.91696	2.93049	2.35617	2.41632	0.669625	0.611299	2.46015	0.517411	1.93343				2.3371	2.56084	3.06012	2.885
Q9Y697	Cysteine desulfurase, mitochondrial	NFS1	1.51595e+07	2.26867e+07	1.67652e+07	1.83708e+07	2.22237e+07	1.83962e+07	1.50338e+07	1.45589e+07	1.69422e+07	2.00991e+07	1.15033e+07	1.8058e+07	12		23.8537	24.4353	23.999	24.1309	24.4056	24.1329	23.8417	23.7954	24.0141	24.2606	23.4555	24.1061		1.07538	1.40381	0.798446	1.03096	1.4353	1.00108	1.55846	1.1273	1.68331	1.80726	1.52757	1.66455	1.34279				1.22759	1.62708	0.941164	1.20421
P36551	Oxygen-dependent coproporphyrinogen-III oxidase, mitochondrial	CPOX	3.27547e+07	1.767e+07	1.82246e+07	5.18376e+07	17818553	1.50669e+07	1.10163e+07	1.8797e+07	2.04741e+07	2.39539e+07	4.46472e+06	3.28545e+07	12		24.9652	24.0748	24.1194	25.6275	24.0869	23.8449	23.3931	24.164	24.2873	24.5138	22.0901	24.9696		2.18687	1.04326	0.918858	2.52755	1.11658	0.713057	1.1099	1.49591	1.95649	2.06039	0.162169	2.528	1.48492				2.49639	1.20919	1.0831	2.95229
P39656	Dolichyl-diphosphooligosaccharide--protein glycosyltransferase 48 kDa subunit	DDOST	8.42756e+07	8.85439e+07	9.44842e+07	8.97119e+07	9.90969e+07	8.95039e+07	5.84735e+07	7.1983e+07	6.49189e+07	7.62265e+07	6.60255e+07	6.27291e+07	12		26.3286	26.3999	26.4936	26.4188	26.5623	26.4154	25.8013	26.1012	25.9521	26.1838	25.9765	25.9026		3.55028	3.36835	3.29305	3.31885	3.59204	3.28363	3.51803	3.43306	3.62133	3.73042	4.04855	3.46105	3.51822				4.05278	3.90408	3.88166	3.87657
O14979	Heterogeneous nuclear ribonucleoprotein D-like	HNRNPDL	5.56843e+07	5.67166e+07	62313425	5.3252e+07	9.56309e+06	5.1155e+07	2.24861e+07	4.16843e+07	1.69091e+07	2.08447e+07	1.49335e+07	2.30542e+07	12		25.7308	25.7573	25.893	25.6663	23.189	25.6084	24.4225	25.313	24.0113	24.3132	23.832	24.4585		2.95244	2.72573	2.69252	2.56639	0.218751	2.47655	2.13928	2.64491	1.68049	1.85981	1.90408	2.01694	2.15649				3.37032	3.15925	3.17379	2.99766
Q8IZL8	Proline-, glutamic acid- and leucine-rich protein 1	PELP1	1.15665e+07	1.13928e+07	1.3697e+07	1.53041e+07	7.89521e+06	1.3699e+07	5.10106e+07	1.70697e+07	6.68244e+07	6.42946e+07	7.06828e+07	1.36247e+07	12		23.4635	23.4416	23.7074	23.8674	22.9125	23.7076	25.6043	24.0249	25.9939	25.9382	26.0749	23.6997		0.685119	0.410084	0.50683	0.767465	-0.057747	0.575742	3.32105	1.35684	3.66307	3.48483	4.14689	1.25814	1.67653				0.782089	0.475307	0.597423	0.896435
Q16658	Fascin	FSCN1	8.03328e+07	7.68832e+07	5.35198e+07	7.54081e+07	9.59376e+07	8.00204e+07	2.01583e+07	9.04703e+07	1.17187e+07	1.4138e+07	1.50317e+07	2.30424e+07	12		26.2595	26.1962	25.6736	26.1682	26.5156	26.2539	24.2649	26.4309	23.4823	23.7531	23.8415	24.4578		3.48115	3.16463	2.47304	3.06827	3.5453	3.12204	1.98162	3.76285	1.15151	1.29971	1.91354	2.0162	2.58166				3.97387	3.66795	2.91509	3.58388
Q15435	Protein phosphatase 1 regulatory subunit 7	PPP1R7	1.7398e+07	2.12643e+07	16558959	8.31829e+07	2.25582e+07	1.94072e+07	3.00435e+07	1.40029e+07	9.75664e+06	1.0673e+07	3.96512e+07	7.68637e+06	12		24.0524	24.3419	23.9811	26.3098	24.4272	24.2101	24.8406	23.7392	23.218	23.3475	25.2409	22.8739		1.27409	1.31039	0.780585	3.20984	1.45686	1.07827	2.55731	1.07114	0.88715	0.894095	3.31289	0.432287	1.52207				1.45442	1.5188	0.920111	3.74924
[truncated: 4,231 more rows]
[truncated: 27 more columns]
