# Supplementary material for: Guide for protein fold change and p -value calculation for non-experts in proteomics
Source: Royal Society of Chemistry journal article supplement (doi:10.1039/d0mo00087f), 2020-09-18
Supplement: d0mo00087f4.xlsx [file d0mo00087f4.xlsx]

## Sheet: Two independent samples
Accession	Description	Gene Symbol	Ctrl-1	Ctrl-2	Ctrl-3	Ctrl-4	Ctrl-5	Ctrl-6	Tr-1	Tr-2	Tr-3	Tr-4	Tr-5	Tr-6	SW test	F-test	Volcano	Fold change	p-value	p-value Bonferroni corrected	Power analysis	Probability to have at least a significant X-fold difference between samples (defined in cell AB2) with Y number of replicates (defined in cell Z2)	# samples required for 80% confidence to observe at least 2 fold changes		# desired replicates	Desired fold change (log2)	Power confidence	Current # replicates
Q96RW7	Hemicentin-1	HMCN1	-6.19783	-6.42661	-6.4324	-6.34763	-6.4823	-6.39462	-1.0667	-1.36323	0.0471742	-0.00916312	0.299371	-0.0443001	#NAME?	0.000674509		6.02409	#NAME?	#NAME?		#NAME?	#NAME?		3	1	0.05	6
O00469	Procollagen-lysine,2-oxoglutarate 5-dioxygenase 2	PLOD2	2.81014	2.83285	3.17673	2.49236	3.1708	3.08437	7.86057	6.32917	7.12697	7.03132	7.65826	6.78496	#NAME?	0.128537		4.204	#NAME?	#NAME?		#NAME?	#NAME?
Q9UK23	N-acetylglucosamine-1-phosphodiester alpha-N-acetylglucosaminidase	NAGPA	-1.89994	-6.15657	-6.44932	-6.49523	-6.55102	-6.48423	-0.265059	-1.0347	0.663417	1.00283	1.28901	0.748342	#NAME?	0.126098		6.07336	#NAME?	#NAME?		#NAME?	#NAME?
O14531	Dihydropyrimidinase-related protein 4	DPYSL4	-5.12419	-6.21864	-6.45917	-6.40623	-5.94249	-6.4103	-2.32575	-2.96962	-2.23405	-2.35826	-2.01084	-3.04921	#NAME?	0.675008		3.60221	#NAME?	#NAME?		#NAME?	#NAME?
O14495	Phospholipid phosphatase 3	PLPP3	-2.88024	-6.44938	-2.94482	-6.26808	-6.61485	-6.51937	1.92928	1.92932	0.984821	0.609195	1.22093	0.66351	#NAME?	0.0263137		6.5023	#NAME?	#NAME?		#NAME?	#NAME?
Q9UHR4	Brain-specific angiogenesis inhibitor 1-associated protein 2-like protein 1	BAIAP2L1	-4.99895	-6.3081	-6.40566	-6.2493	-6.3796	-6.63841	-3.49822	-2.213	-1.5455	-1.29569	-1.63935	-2.06542	#NAME?	0.528252		4.12047	#NAME?	#NAME?		#NAME?	#NAME?
O00203	AP-3 complex subunit beta-1	AP3B1	2.17336	-0.0547259	0.348963	0.0637748	-0.0332108	-0.596398	5.12997	4.1987	4.43388	4.08603	5.96126	3.83575	#NAME?	0.691859		4.29064	#NAME?	#NAME?		#NAME?	#NAME?
P54274	Telomeric repeat-binding factor 1	TERF1	-4.61019	-6.26231	-6.52928	-6.35512	-6.62303	-6.59565	-4.10707	-0.617161	-1.30992	-1.02214	-2.56658	-0.0583022	#NAME?	0.179841		4.54907	#NAME?	#NAME?		#NAME?	#NAME?
Q9BXI6	TBC1 domain family member 10A	TBC1D10A	-6.2727	-6.25419	-6.29705	-6.37919	-6.59143	-6.64336	-3.24006	-3.19971	-2.38469	-3.14416	-2.70697	-1.61375	#NAME?	0.0116024		3.69143	#NAME?	#NAME?		#NAME?	#NAME?
P17900	Ganglioside GM2 activator	GM2A	-3.35453	-6.23473	-6.30285	-5.59742	-5.57299	-6.92973	3.31576	-0.237342	-0.443115	-0.562036	3.31705	-0.121793	#NAME?	0.37305		6.54346	#NAME?	#NAME?		#NAME?	#NAME?
Q06330	Recombining binding protein suppressor of hairless	RBPJ	1.37934	-0.581	-3.41718	-3.31078	-3.95899	-4.22912	1.67647	1.33154	2.8995	3.11074	3.27881	3.94147	#NAME?	0.100434		5.05938	#NAME?	#NAME?		#NAME?	#NAME?
Q9Y5N6	Origin recognition complex subunit 6	ORC6	-6.00166	-6.38177	-6.50568	-6.2066	-6.39249	-6.57526	-0.0607406	-5.8786	1.50078	1.50616	-0.261884	0.716479	#NAME?	2.58877e-05		5.93094	#NAME?	#NAME?		#NAME?	#NAME?
Q9NXV2	BTB/POZ domain-containing protein KCTD5	KCTD5	-3.34373	-4.29529	-6.39934	-5.43376	-3.82955	-4.97696	5.29963	-1.77454	-1.34465	-1.31484	6.35938	-1.46494	#NAME?	0.0181153		5.67311	#NAME?	#NAME?		#NAME?	#NAME?
Q96CV9	Optineurin	OPTN	-3.31397	-4.57524	-5.19449	-3.08174	-4.19252	-4.05671	-0.330932	-0.654581	-0.594111	-0.93478	-0.520385	-0.465699	#NAME?	0.0104282		3.4857	#NAME?	#NAME?		#NAME?	#NAME?
Q9BUL5	PHD finger protein 23	PHF23	-4.03085	-6.23668	-6.51732	-6.28476	-6.46057	-6.57447	0.289381	-4.05702	-2.78803	-2.72404	-0.116188	-1.38617	#NAME?	0.258143		4.22043	#NAME?	#NAME?		#NAME?	#NAME?
Q9UKP4	A disintegrin and metalloproteinase with thrombospondin motifs 7	ADAMTS7	-6.02229	-2.34682	-6.35842	-6.46178	-6.59045	-6.60057	-1.0542	-0.33639	-1.12323	-0.970414	-1.66234	-2.0687	#NAME?	0.041877		4.52751	#NAME?	#NAME?		#NAME?	#NAME?
Q6PI48	Aspartate--tRNA ligase, mitochondrial	DARS2	1.21515	-0.867466	-0.461898	-1.26306	-1.26802	-1.32994	3.557	2.69379	2.2788	2.03553	5.04507	2.38833	#NAME?	0.75533		3.66229	#NAME?	#NAME?		#NAME?	#NAME?
Q6ZRV2	Protein FAM83H	FAM83H	-3.84947	-3.98788	-3.52335	-5.1574	-2.40699	-4.32281	-0.134359	-0.160038	-0.140437	-0.324937	-0.486608	-0.0774712	#NAME?	0.00139639		3.65401	#NAME?	#NAME?		#NAME?	#NAME?
P33121	Long-chain-fatty-acid--CoA ligase 1	ACSL1	-5.61514	-4.74375	-5.13894	-5.14218	-6.36832	-5.42031	-2.33719	-2.64912	-2.92452	-2.26049	-1.34227	-3.51317	#NAME?	0.569411		2.90031	#NAME?	#NAME?		#NAME?	#NAME?
Q53H96	Pyrroline-5-carboxylate reductase 3	PYCR3	-1.94177	-2.34174	-4.09253	-2.40179	-3.54041	-2.60169	-0.775096	0.089917	0.115164	0.236432	1.18976	0.486656	#NAME?	0.593485		3.04379	#NAME?	#NAME?		#NAME?	#NAME?
Q8NFI3	Cytosolic endo-beta-N-acetylglucosaminidase	ENGASE	0.900982	-6.31035	-6.3062	-6.31119	-6.53939	-6.51087	-0.944583	1.12163	1.40223	1.49876	-0.707976	0.0766945	#NAME?	0.044422		5.5873	#NAME?	#NAME?		#NAME?	#NAME?
Q9HCD5	Nuclear receptor coactivator 5	NCOA5	2.38038	0.393423	-0.244661	-0.328193	0.0763937	-0.242106	3.56181	3.07594	3.24606	3.27567	4.11685	2.97904	#NAME?	0.0657229		3.03669	#NAME?	#NAME?		#NAME?	#NAME?
Q5T1J5	Putative coiled-coil-helix-coiled-coil-helix domain-containing protein CHCHD2P9, mitochondrial	CHCHD2P9	-2.67748	-6.21641	-5.47281	-6.44474	-6.45692	-6.3767	-1.2419	-2.36468	-1.97488	-2.54168	-0.849199	-2.71594	#NAME?	0.162068		3.65946	#NAME?	#NAME?		#NAME?	#NAME?
Q9Y3D3	28S ribosomal protein S16, mitochondrial	MRPS16	0.302482	-0.645576	-0.256476	-0.499541	0.18126	-0.633399	2.31742	1.54399	1.73135	2.08446	2.43152	1.69138	#NAME?	0.78525		2.22523	#NAME?	#NAME?		#NAME?	#NAME?
O95825	Quinone oxidoreductase-like protein 1	CRYZL1	-3.8623	-3.42059	-4.72179	-3.81938	-5.55141	-5.80966	-1.32837	-1.99254	-0.108243	-0.527382	-2.59088	-1.42378	#NAME?	0.864841		3.20232	#NAME?	#NAME?		#NAME?	#NAME?
Q9Y2D4	Exocyst complex component 6B	EXOC6B	-5.63775	-3.86441	-3.1316	-4.36061	-3.56026	-4.66057	-2.58826	-0.325183	0.366654	0.48749	-2.36222	1.63875	#NAME?	0.189157		3.73874	#NAME?	#NAME?		#NAME?	#NAME?
P07203	Glutathione peroxidase 1	GPX1	-3.3312	-5.2618	-6.42211	-6.03461	-6.53286	-6.40846	-3.66083	-1.77174	-2.49734	0.558923	1.71931	-2.92088	#NAME?	0.263303		4.23641	#NAME?	#NAME?		#NAME?	#NAME?
Q9BY43	Charged multivesicular body protein 4a	CHMP4A	0.915443	-6.31756	-2.79241	-3.26551	-4.28822	-6.49242	0.983485	0.907798	1.55475	1.56092	2.0274	1.30239	#NAME?	0.000826496		5.09624	#NAME?	#NAME?		#NAME?	#NAME?
Q96PV6	Leukocyte receptor cluster member 8	LENG8	-2.35434	-2.30365	-1.57528	-1.28524	-1.82631	-1.25896	0.292157	-0.186144	0.403661	0.630673	0.338227	0.974346	#NAME?	0.633278		2.17612	#NAME?	#NAME?		#NAME?	#NAME?
Q96QE5	Transcription elongation factor, mitochondrial	TEFM	-3.8508	-6.15605	-6.41801	-6.47543	-6.43224	-6.64634	-2.64597	-3.11557	-2.93732	-2.84915	-3.05969	-4.049	#NAME?	0.113872		2.88703	#NAME?	#NAME?		#NAME?	#NAME?
Q96LA8	Protein arginine N-methyltransferase 6	PRMT6	-1.40961	-1.42272	-1.4389	-1.86185	2.14271	-0.355418	3.19115	0.897778	3.69616	3.76699	3.44642	2.23719	#NAME?	0.538499		3.59691	#NAME?	#NAME?		#NAME?	#NAME?
P54198	Protein HIRA	HIRA	-3.42715	-5.4626	-4.95958	-5.68429	-6.58672	-6.63321	-0.439744	-1.39745	-2.88232	-2.80204	1.35227	-3.57551	#NAME?	0.355519		3.83479	#NAME?	#NAME?		#NAME?	#NAME?
P28161	Glutathione S-transferase Mu 2	GSTM2	-4.10165	-2.75742	-3.68521	-3.55304	-3.31957	-4.20486	-1.43976	-0.862109	-0.540386	-0.584047	-2.41848	-1.01006	#NAME?	0.551222		2.46115	#NAME?	#NAME?		#NAME?	#NAME?
Q9NTX9	Protein FAM217B	FAM217B	-6.17255	-6.17272	-6.5459	-6.26018	-2.18682	-6.45896	-6.33726	1.89735	1.7626	1.52074	-1.53844	1.85675	#NAME?	0.167668		5.49314	#NAME?	#NAME?		#NAME?	#NAME?
Q14894	Ketimine reductase mu-crystallin	CRYM	-6.07911	-5.38384	-5.5811	-5.3459	-3.12106	-4.20015	-0.398845	-0.374518	-1.53505	-1.96999	-1.16192	-4.05806	#NAME?	0.63146		3.36879	#NAME?	#NAME?		#NAME?	#NAME?
Q8TE96	ATP-dependent RNA helicase DQX1	DQX1	-5.4591	-3.08654	-5.20463	-4.27279	-5.42478	-4.66198	1.44543	-2.0363	-3.09112	-2.60591	-0.102155	-0.229827	#NAME?	0.177047		3.58166	#NAME?	#NAME?		#NAME?	#NAME?
P19634	Sodium/hydrogen exchanger 1	SLC9A1	-6.04416	-6.20001	-3.92082	-6.2355	-6.54952	-2.52375	2.9058	-2.02044	-2.74493	-2.66376	2.59798	-2.27786	#NAME?	0.299771		4.54509	#NAME?	#NAME?		#NAME?	#NAME?
Q8WV74	Nucleoside diphosphate-linked moiety X motif 8	NUDT8	1.49165	-0.200598	-0.746926	-0.546159	-1.72396	-1.09746	1.64133	1.29344	2.97048	2.94265	2.81066	3.49039	#NAME?	0.609291		2.9954	#NAME?	#NAME?		#NAME?	#NAME?
Q00536	Cyclin-dependent kinase 16	CDK16	-6.01947	-6.29046	-6.3286	-6.44631	-6.39136	-6.37279	-1.82419	-4.42815	-3.97651	-2.59373	-2.79012	-3.77092	#NAME?	0.000847499		3.07756	#NAME?	#NAME?		#NAME?	#NAME?
Q96DF8	Splicing factor ESS-2 homolog	ESS2	1.37623	-4.07396	-4.29397	-3.78458	-4.22509	-4.51637	0.0461214	1.09883	1.43919	1.70847	0.184159	1.58034	#NAME?	0.0247966		4.26248	#NAME?	#NAME?		#NAME?	#NAME?
P00450	Ceruloplasmin	CP	3.33087	-0.487867	0.135378	-0.64487	-0.0413497	0.151628	4.03311	3.34855	3.85512	3.81491	4.22657	4.3369	#NAME?	0.00706124		3.52856	#NAME?	#NAME?		#NAME?	#NAME?
Q5NDL2	EGF domain-specific O-linked N-acetylglucosamine transferase	EOGT	-6.29444	-5.30486	-6.29816	-4.09917	-4.02419	-4.23454	-0.617137	-4.13659	-2.53983	-1.76287	-0.799761	-1.56321	#NAME?	0.693319		3.13933	#NAME?	#NAME?		#NAME?	#NAME?
Q15057	Arf-GAP with coiled-coil, ANK repeat and PH domain-containing protein 2	ACAP2	-3.44556	-3.72744	-4.89041	-3.8786	-4.71408	-5.35078	-1.85387	-1.19879	-1.66823	-1.95793	-2.5673	-2.67681	#NAME?	0.521188		2.34732	#NAME?	#NAME?		#NAME?	#NAME?
O75170	Serine/threonine-protein phosphatase 6 regulatory subunit 2	PPP6R2	-0.14035	-0.170209	-1.33283	-1.75166	-1.13682	-0.624016	1.00137	0.305195	1.60346	2.29511	2.83685	2.22586	#NAME?	0.454011		2.57063	#NAME?	#NAME?		#NAME?	#NAME?
P00568	Adenylate kinase isoenzyme 1	AK1	0.613979	0.207414	0.131787	0.226082	0.175382	0.458152	2.42068	1.76611	1.61375	1.90539	2.61775	1.68184	#NAME?	0.109758		1.69879	#NAME?	#NAME?		#NAME?	#NAME?
Q9P1Z9	Coiled-coil domain-containing protein 180	CCDC180	-1.7371	-1.32962	-6.51841	-1.03213	-1.04597	-2.20638	2.19557	-1.3557	3.44164	3.42199	1.95422	2.82678	#NAME?	0.728869		4.39235	#NAME?	#NAME?		#NAME?	#NAME?
P21926	CD9 antigen	CD9	-6.12796	-6.40133	-5.94813	-6.18129	-6.52222	-7.0872	-1.092	-3.24714	-3.16063	-5.30656	-0.590571	-3.21717	#NAME?	0.00652532		3.60901	#NAME?	#NAME?		#NAME?	#NAME?
Q08623	Pseudouridine-5'-phosphatase	PUDP	-0.854375	-1.26298	-0.92148	-1.15588	-1.76233	-1.68855	0.829564	-0.0558691	0.493356	0.326538	0.540547	0.972309	#NAME?	0.934131		1.79201	#NAME?	#NAME?		#NAME?	#NAME?
Q6EMB2	Tubulin polyglutamylase TTLL5	TTLL5	-2.56373	-4.35496	-4.67326	-3.75802	-3.98971	-3.46434	1.15798	-2.68697	-1.26725	-1.19976	1.94326	-1.13778	#NAME?	0.0863165		3.26892	#NAME?	#NAME?		#NAME?	#NAME?
Q86XZ4	Spermatogenesis-associated serine-rich protein 2	SPATS2	-0.0937044	-0.533803	-0.535524	-0.208971	-0.138848	-0.31043	3.08469	2.24714	3.11037	3.28308	3.22655	3.29871	#NAME?	0.137726		3.3453	#NAME?	#NAME?		#NAME?	#NAME?
Q70UQ0	Inhibitor of nuclear factor kappa-B kinase-interacting protein	IKBIP	1.43413	0.618152	0.203183	1.3763	0.776915	0.204475	3.9518	1.48179	3.33332	3.46309	3.89851	3.13396	#NAME?	0.286013		2.44155	#NAME?	#NAME?		#NAME?	#NAME?
Q9H307	Pinin	PNN	2.2688	1.06303	1.39946	1.08545	1.21736	1.05608	3.948	2.67544	3.24996	3.13709	4.56107	3.39295	#NAME?	0.463294		2.14572	#NAME?	#NAME?		#NAME?	#NAME?
Q99880	Histone H2B type 1-L	HIST1H2BL	-6.28814	-6.34303	-5.97297	-1.43829	-0.935802	-2.39639	1.04306	-0.102991	0.41513	0.375244	1.12644	-0.512034	#NAME?	0.00816751		4.28658	#NAME?	#NAME?		#NAME?	#NAME?
P51580	Thiopurine S-methyltransferase	TPMT	-1.97988	-3.66167	-1.15845	-1.60168	-1.72389	-3.21352	1.97344	-0.802378	0.0777461	0.131397	2.58397	0.542107	#NAME?	0.587196		2.97423	#NAME?	#NAME?		#NAME?	#NAME?
Q9Y5B6	PAX3- and PAX7-binding protein 1	PAXBP1	-3.10042	-3.45912	-3.75952	-3.43415	-3.44659	-3.41813	-1.28399	-1.66021	-1.55914	-2.26526	-2.02813	-2.13947	#NAME?	0.213921		1.61362	#NAME?	#NAME?		#NAME?	#NAME?
Q9UBU9	Nuclear RNA export factor 1	NXF1	0.648816	-0.40292	0.160322	0.479444	-0.0637694	0.599613	2.68149	1.31952	2.39981	2.32384	2.26262	1.85975	#NAME?	0.755081		1.90425	#NAME?	#NAME?		#NAME?	#NAME?
O60675	Transcription factor MafK	MAFK	-5.33022	-6.39097	-5.59317	-3.53871	-3.3994	-5.19623	-2.57301	-3.52487	-2.01808	-1.69671	-1.29056	-1.5119	#NAME?	0.444243		2.80559	#NAME?	#NAME?		#NAME?	#NAME?
O15344	E3 ubiquitin-protein ligase Midline-1	MID1	1.25562	-6.36195	-6.44736	-6.34561	-6.3424	-6.39996	-1.51143	1.07898	1.21059	1.1726	-0.903972	1.19856	#NAME?	0.0645247		5.48117	#NAME?	#NAME?		#NAME?	#NAME?
Q14444	Caprin-1	CAPRIN1	1.73087	2.416	1.40576	2.15751	1.68208	0.729659	4.79517	5.7784	6.46092	6.39017	4.62738	2.11939	#NAME?	0.0450939		3.34159	#NAME?	#NAME?		#NAME?	#NAME?
Q27J81	Inverted formin-2	INF2	-0.115455	-2.32899	-2.61608	-1.87821	-2.56542	-2.97677	-0.814293	1.3308	0.754341	0.764171	0.090294	1.10668	#NAME?	0.567073		2.61882	#NAME?	#NAME?		#NAME?	#NAME?
Q01970	1-phosphatidylinositol 4,5-bisphosphate phosphodiesterase beta-3	PLCB3	-0.818864	-6.38982	-6.44346	-6.24172	-0.632352	-4.05066	1.22804	-0.956366	0.80827	0.566586	0.539547	-1.06819	#NAME?	0.0370348		4.28246	#NAME?	#NAME?		#NAME?	#NAME?
Q9NVU7	Protein SDA1 homolog	SDAD1	-1.10179	-1.62216	-2.29563	-1.72398	-1.08766	-1.90936	0.369272	-0.430349	-0.0496363	0.432712	0.381646	0.233001	#NAME?	0.480531		1.77954	#NAME?	#NAME?		#NAME?	#NAME?
Q9Y6N5	Sulfide:quinone oxidoreductase, mitochondrial	SQOR	0.547893	0.498758	1.03945	0.963136	0.533234	0.432332	6.33215	2.20104	2.51067	2.60292	6.3904	2.51246	#NAME?	0.000371238		3.08914	#NAME?	#NAME?		#NAME?	#NAME?
Q96EB6	NAD-dependent protein deacetylase sirtuin-1	SIRT1	-3.8518	-6.25373	-5.09096	-6.46693	-6.33819	-4.82794	-2.07084	-6.05267	-0.0868197	-1.64543	-1.19383	-0.461814	#NAME?	0.141979		3.55303	#NAME?	#NAME?		#NAME?	#NAME?
O75122	CLIP-associating protein 2	CLASP2	-3.67793	-2.66104	-6.29258	-3.80467	-2.2323	-2.99596	1.78839	-2.72953	0.155738	-0.968342	2.08259	-1.02867	#NAME?	0.607116		3.49411	#NAME?	#NAME?		#NAME?	#NAME?
O75648	Mitochondrial tRNA-specific 2-thiouridylase 1	TRMU	-0.822121	-5.84302	-6.36344	-6.49926	-1.22548	-1.77812	-1.29457	-0.426201	1.52144	1.57151	-1.33684	1.85178	#NAME?	0.2119		4.06976	#NAME?	#NAME?		#NAME?	#NAME?
P25440	Bromodomain-containing protein 2	BRD2	-2.47272	-5.61097	-2.50741	-4.22884	-3.94758	-4.03995	1.34912	-1.21743	-2.09014	-2.04247	2.79593	-0.837838	#NAME?	0.279847		3.46077	#NAME?	#NAME?		#NAME?	#NAME?
P05981	Serine protease hepsin	HPN	-2.47221	-4.53856	-3.59724	-6.42764	-4.3182	-4.92546	-0.838321	-2.4379	-1.72834	-2.02883	-1.54804	-1.50471	#NAME?	0.0706659		2.69886	#NAME?	#NAME?		#NAME?	#NAME?
P58107	Epiplakin	EPPK1	0.192282	-0.324821	0.118967	0.53545	0.471571	0.402678	2.63498	2.05221	1.54668	1.6499	1.57238	2.69596	#NAME?	0.286504		1.79266	#NAME?	#NAME?		#NAME?	#NAME?
Q5R372	Rab GTPase-activating protein 1-like	RABGAP1L	-3.39662	-3.24294	-3.18475	-4.24855	-3.58385	-3.56782	-2.24722	-0.990501	-1.77321	-0.748452	-2.25465	-1.57139	#NAME?	0.304962		1.93985	#NAME?	#NAME?		#NAME?	#NAME?
O00461	Golgi integral membrane protein 4	GOLIM4	1.8703	-0.713357	-0.375134	-0.0113187	-0.737067	-0.378266	2.40516	1.71108	2.06173	1.9085	2.70804	2.75244	#NAME?	0.0950466		2.3153	#NAME?	#NAME?		#NAME?	#NAME?
Q29980	MHC class I polypeptide-related sequence B	MICB	-3.87173	-4.50097	-6.43698	-6.20791	-5.38785	-5.56554	-3.50338	-2.68129	-0.427726	-1.00834	-4.35936	-2.09365	#NAME?	0.389951		2.98287	#NAME?	#NAME?		#NAME?	#NAME?
Q6NSJ5	Volume-regulated anion channel subunit LRRC8E	LRRC8E	-1.40894	-5.1246	-4.84571	-4.90494	-5.39018	-6.38011	-1.15921	-1.41715	-1.85097	-2.03617	-1.25571	-0.556177	#NAME?	0.0230067		3.29651	#NAME?	#NAME?		#NAME?	#NAME?
P0CG38	POTE ankyrin domain family member I	POTEI	-6.12178	-6.15913	-6.38399	-6.35651	-6.55805	-6.64322	-0.992934	-1.15834	-0.722999	-1.54531	-2.40982	-6.44055	#NAME?	8.85982e-05		4.15879	#NAME?	#NAME?		#NAME?	#NAME?
Q9BSK2	Solute carrier family 25 member 33	SLC25A33	3.79955	0.128055	0.165601	0.256254	0.0152302	0.424967	3.93915	3.63532	3.51239	3.43072	4.74526	4.00537	#NAME?	0.028251		3.07976	#NAME?	#NAME?		#NAME?	#NAME?
O00258	Tail-anchored protein insertion receptor WRB	WRB	-5.44072	-6.27938	-5.00605	-6.43686	-3.20059	-6.46798	-1.63873	-3.13992	-2.9287	-3.10508	-1.21168	-3.92497	#NAME?	0.658508		2.81375	#NAME?	#NAME?		#NAME?	#NAME?
Q96EK7	Constitutive coactivator of peroxisome proliferator-activated receptor gamma	FAM120B	-4.00864	-4.89894	-3.92077	-3.28848	-4.06715	-3.72366	-2.16528	-2.35256	-2.83753	-1.77141	-1.99845	-2.13234	#NAME?	0.427994		1.77501	#NAME?	#NAME?		#NAME?	#NAME?
O00255	Menin	MEN1	1.98334	-3.1923	-3.31259	-4.33247	-3.54026	-3.91191	-1.90136	2.62102	2.26244	2.12376	-1.43675	1.85239	#NAME?	0.759416		3.63795	#NAME?	#NAME?		#NAME?	#NAME?
P32320	Cytidine deaminase	CDA	-3.5829	-5.63437	-3.96718	-6.25015	-5.23021	-5.30317	-2.36682	-2.4497	-2.58897	-1.56128	-1.57521	-2.62406	#NAME?	0.138153		2.80032	#NAME?	#NAME?		#NAME?	#NAME?
Q7L775	EPM2A-interacting protein 1	EPM2AIP1	-1.32319	-6.28456	-5.55597	-6.34464	-4.58373	-5.42868	-5.34987	0.186323	0.214776	0.462022	-3.37451	0.0477566	#NAME?	0.569734		3.61788	#NAME?	#NAME?		#NAME?	#NAME?
Q05513	Protein kinase C zeta type	PRKCZ	-3.22124	-3.52126	-2.95415	-2.13628	-3.28538	-3.48263	-1.33336	-1.50076	-1.87123	-0.998289	-0.507002	-1.41626	#NAME?	0.84151		1.829	#NAME?	#NAME?		#NAME?	#NAME?
Q96G25	Mediator of RNA polymerase II transcription subunit 8	MED8	-2.59989	-5.64943	-3.60311	-4.16912	-3.12741	-6.65632	-0.213642	-1.94451	-1.79779	-1.91766	-1.88945	-1.41689	#NAME?	0.0893899		2.77089	#NAME?	#NAME?		#NAME?	#NAME?
Q99567	Nuclear pore complex protein Nup88	NUP88	0.0848236	-1.49078	-1.56704	-1.11038	-1.85236	-1.30265	0.564322	0.980219	0.802771	0.538039	0.0879388	1.48338	#NAME?	0.439846		1.94917	#NAME?	#NAME?		#NAME?	#NAME?
P50747	Biotin--protein ligase	HLCS	-1.37608	-1.24606	-3.61859	-5.54073	-1.75838	-4.22986	0.119607	-1.93537	1.17191	1.30158	1.44421	1.02644	#NAME?	0.508308		3.48302	#NAME?	#NAME?		#NAME?	#NAME?
Q15276	Rab GTPase-binding effector protein 1	RABEP1	-2.56824	-3.22842	-4.49799	-4.77488	-4.48804	-4.24692	-1.01736	-2.07358	-2.28311	-1.62953	-2.21214	-2.00148	#NAME?	0.210939		2.09788	#NAME?	#NAME?		#NAME?	#NAME?
Q92616	eIF-2-alpha kinase activator GCN1	GCN1	2.65804	2.60295	3.52959	2.37353	2.35697	2.11444	4.61171	4.3628	4.57941	4.19874	4.47792	4.37041	#NAME?	0.023513		1.82758	#NAME?	#NAME?		#NAME?	#NAME?
Q14CZ7	FAST kinase domain-containing protein 3, mitochondrial	FASTKD3	-4.56323	-6.42826	-6.44207	-4.60188	-6.56363	-6.48126	-3.77668	-2.50439	-3.64804	-3.51165	-4.10602	-4.06734	#NAME?	0.282845		2.24437	#NAME?	#NAME?		#NAME?	#NAME?
Q5HYK3	2-methoxy-6-polyprenyl-1,4-benzoquinol methylase, mitochondrial	COQ5	-0.858413	-0.581078	-0.509583	0.0519727	-1.14725	0.239984	1.04078	0.900977	1.41614	1.32326	1.34974	0.878214	#NAME?	0.107964		1.61891	#NAME?	#NAME?		#NAME?	#NAME?
P46734	Dual specificity mitogen-activated protein kinase kinase 3	MAP2K3	0.0359844	-0.768861	-0.161031	-0.467406	-0.560304	-0.617217	2.87449	0.537126	2.25865	2.28147	2.50651	0.984343	#NAME?	0.0281836		2.33024	#NAME?	#NAME?		#NAME?	#NAME?
Q7Z417	Nuclear fragile X mental retardation-interacting protein 2	NUFIP2	-0.86246	-0.180256	-2.34324	-1.64099	-1.45817	-1.47298	2.49987	-1.08252	2.0026	1.9116	2.83754	1.86248	#NAME?	0.182398		2.99828	#NAME?	#NAME?		#NAME?	#NAME?
Q8IWT6	Volume-regulated anion channel subunit LRRC8A	LRRC8A	-4.27421	-3.16455	-3.06488	-2.98873	-3.14996	-4.43553	0.81127	-3.26744	0.417725	-0.307899	-1.41511	-1.4472	#NAME?	0.0953446		2.64487	#NAME?	#NAME?		#NAME?	#NAME?
Q9P031	Thyroid transcription factor 1-associated protein 26	CCDC59	-1.06096	-0.493074	-0.978994	-0.598008	-0.29899	-1.08591	1.23047	0.141009	2.69793	2.71796	1.00935	2.71471	#NAME?	0.0193424		2.50456	#NAME?	#NAME?		#NAME?	#NAME?
P23469	Receptor-type tyrosine-protein phosphatase epsilon	PTPRE	-3.3665	-6.26825	-3.05578	-6.32955	-6.43832	-3.04773	-2.73852	-2.68368	-2.77669	-2.37848	-0.522033	-2.38045	#NAME?	0.146476		2.50438	#NAME?	#NAME?		#NAME?	#NAME?
Q8N122	Regulatory-associated protein of mTOR	RPTOR	-0.301922	-2.6617	-2.80333	-1.45778	-2.4527	-2.96951	2.6197	-0.539989	0.250978	-0.62744	2.18631	-0.13425	#NAME?	0.503335		2.73371	#NAME?	#NAME?		#NAME?	#NAME?
O60437	Periplakin	PPL	-6.19709	-6.29807	-6.32801	-6.46846	-6.53187	-6.4263	-2.83028	-2.75327	-2.56609	-1.916	-3.73891	-6.40847	#NAME?	2.86634e-05		3.00613	#NAME?	#NAME?		#NAME?	#NAME?
Q8NB37	Glutamine amidotransferase-like class 1 domain-containing protein 1	GATD1	-2.32224	-6.44896	-6.39591	-6.39183	-3.45392	-2.998	-0.264824	-2.02166	-1.57344	-1.78562	-1.20324	-1.8527	#NAME?	0.0302163		3.21823	#NAME?	#NAME?		#NAME?	#NAME?
Q70Z53	Protein FRA10AC1	FRA10AC1	-6.18385	-6.26768	-6.52342	-6.28328	-6.39038	-6.64319	0.089178	-4.30627	-2.50666	-2.54286	0.371854	-6.6265	#NAME?	1.27635e-05		3.79509	#NAME?	#NAME?		#NAME?	#NAME?
Q9NUL5	Repressor of yield of DENV protein	RYDEN	-2.44468	-3.73438	-3.02191	-2.87725	-3.41875	-2.92804	-0.893984	-2.16041	-1.56562	-1.65594	-0.700917	-1.12832	#NAME?	0.690547		1.71997	#NAME?	#NAME?		#NAME?	#NAME?
Q8N8G6	Putative uncharacterized protein C15orf54	C15orf54	-2.91927	-3.63296	-3.8485	-6.44841	-4.03537	-6.6401	2.29432	-5.89375	-1.87004	-0.98837	2.60456	-0.173403	#NAME?	0.156095		3.91632	#NAME?	#NAME?		#NAME?	#NAME?
Q8IZL8	Proline-, glutamic acid- and leucine-rich protein 1	PELP1	0.782089	0.475307	0.597423	0.896435	-0.068917	0.689458	4.08695	1.53754	4.32888	4.09803	5.36373	1.52512	#NAME?	0.00425411		2.92807	#NAME?	#NAME?		#NAME?	#NAME?
Q9UBT7	Alpha-catulin	CTNNAL1	-5.20855	-5.76153	-5.75162	-5.43764	-5.34375	-6.65463	-1.91145	-5.97282	-1.42161	-1.19099	-0.644406	-0.442152	#NAME?	0.00917691		3.76238	#NAME?	#NAME?		#NAME?	#NAME?
P25685	DnaJ homolog subfamily B member 1	DNAJB1	1.57275	1.40167	2.02492	1.78061	1.68151	1.63215	3.47378	2.45093	2.94702	2.85987	3.4376	3.08728	#NAME?	0.211379		1.36048	#NAME?	#NAME?		#NAME?	#NAME?
Q8IXM6	Nurim	NRM	0.310548	-1.15653	-1.73377	-1.6421	-0.211412	-1.68026	6.33954	0.545774	-0.439336	-0.0555521	8.03865	5.91642	#NAME?	0.00582886		4.40984	#NAME?	#NAME?		#NAME?	#NAME?
Q92783	Signal transducing adapter molecule 1	STAM	0.395305	0.325677	-0.739038	-0.486283	-1.14475	-1.38772	1.52695	-0.0349552	1.92319	1.76134	2.3279	2.32724	#NAME?	0.717513		2.14475	#NAME?	#NAME?		#NAME?	#NAME?
P36575	Arrestin-C	ARR3	-2.67815	-6.36457	-6.48895	-6.31463	-6.56401	-6.54766	-1.87629	-6.01852	-2.26749	-3.05524	-2.47764	-2.44487	#NAME?	0.967326		2.80299	#NAME?	#NAME?		#NAME?	#NAME?
P49593	Protein phosphatase 1F	PPM1F	-0.143416	-1.31795	0.584019	-0.6636	0.225996	-0.226193	3.17479	-0.226464	1.89703	1.95512	3.27356	3.07333	#NAME?	0.156789		2.44808	#NAME?	#NAME?		#NAME?	#NAME?
P28676	Grancalcin	GCA	-2.6589	-3.63463	-3.62681	-6.44293	-6.34312	-6.37437	-0.0686674	-0.944666	-1.96655	-2.24799	-1.51935	-4.25659	#NAME?	0.679112		3.01283	#NAME?	#NAME?		#NAME?	#NAME?
Q9HB90	Ras-related GTP-binding protein C	RRAGC	-0.0986206	-6.35887	-6.38362	-6.24888	-6.55929	-6.5995	-1.73298	-0.556553	-2.31736	-3.17516	-1.31961	-2.8545	#NAME?	0.0531939		3.3821	#NAME?	#NAME?		#NAME?	#NAME?
O14894	Transmembrane 4 L6 family member 5	TM4SF5	-3.19768	-5.83021	-6.33265	-6.35318	-6.46043	-6.5653	-3.09732	-6.02982	-2.36849	-2.29256	-2.0353	-2.31853	#NAME?	0.738584		2.76623	#NAME?	#NAME?		#NAME?	#NAME?
Q86U90	YrdC domain-containing protein, mitochondrial	YRDC	-3.38399	-1.77637	-0.278853	-1.50136	-3.53274	-2.69145	0.424161	-0.0750632	0.40859	0.587036	0.0763629	0.72586	#NAME?	0.00759172		2.55195	#NAME?	#NAME?		#NAME?	#NAME?
Q68E01	Integrator complex subunit 3	INTS3	-2.98678	-2.5058	-5.22209	-4.0177	-5.15681	-5.06637	-1.93532	-1.93562	-1.3562	-1.28151	-1.41877	-2.27839	#NAME?	0.033455		2.45829	#NAME?	#NAME?		#NAME?	#NAME?
O75369	Filamin-B	FLNB	2.34667	1.85928	1.21103	-0.0873334	2.54264	0.345116	6.88999	2.20933	2.72784	3.09974	6.35339	4.84005	#NAME?	0.207688		2.98382	#NAME?	#NAME?		#NAME?	#NAME?
P31146	Coronin-1A	CORO1A	2.57444	-6.41975	-5.80487	-4.30148	-6.62832	-5.2362	0.141013	-0.30761	-0.234796	-0.548402	-0.0411827	-0.0545679	#NAME?	1.75444e-05		4.12844	#NAME?	#NAME?		#NAME?	#NAME?
Q9NW08	DNA-directed RNA polymerase III subunit RPC2	POLR3B	-2.67368	-3.61221	-3.18151	-4.78186	-2.19405	-2.73742	-0.0475216	-3.20711	0.441935	0.425361	0.879817	1.42831	#NAME?	0.224279		3.18359	#NAME?	#NAME?		#NAME?	#NAME?
P00966	Argininosuccinate synthase	ASS1	2.07675	0.901745	0.596176	0.762702	2.48767	0.631595	3.52528	2.50455	2.85829	3.07511	4.22907	3.03885	#NAME?	0.507643		1.96242	#NAME?	#NAME?		#NAME?	#NAME?
P43694	Transcription factor GATA-4	GATA4	-6.01652	-2.34763	-3.00386	-6.24037	-3.08621	-6.53496	-0.716981	-2.5407	-2.96604	-2.0084	-1.56414	0.657542	#NAME?	0.436941		3.01514	#NAME?	#NAME?		#NAME?	#NAME?
P12277	Creatine kinase B-type	CKB	1.71825	0.952288	1.06958	1.08747	-1.50961	1.41174	5.19933	2.41021	1.82938	2.08061	4.59829	1.99224	#NAME?	0.604921		2.23006	#NAME?	#NAME?		#NAME?	#NAME?
P28065	Proteasome subunit beta type-9	PSMB9	-3.30887	-3.44016	-6.54258	-3.11603	-3.44231	-2.97729	-1.88212	-2.19526	-0.611521	-1.20143	-1.26013	-1.6081	#NAME?	0.0751091		2.34478	#NAME?	#NAME?		#NAME?	#NAME?
O43716	Glutamyl-tRNA(Gln) amidotransferase subunit C, mitochondrial	GATC	0.183267	-3.0153	-4.0211	-3.03672	-5.10198	-4.79622	0.171609	0.534445	-0.237281	-0.259272	-1.10307	-0.86012	#NAME?	0.0260733		3.00573	#NAME?	#NAME?		#NAME?	#NAME?
Q7LGA3	Heparan sulfate 2-O-sulfotransferase 1	HS2ST1	2.85161	-0.756276	-0.020864	-1.56209	1.07925	1.24926	2.75344	4.27857	3.41083	3.50948	1.20099	3.87343	#NAME?	0.433122		2.69764	#NAME?	#NAME?		#NAME?	#NAME?
Q969V5	Mitochondrial ubiquitin ligase activator of NFKB 1	MUL1	-6.26342	-6.26893	-6.29451	-6.3208	-6.5464	-6.56324	-2.50398	-6.10581	-1.63267	-1.35639	-1.62648	-6.35784	#NAME?	8.33583e-06		3.11236	#NAME?	#NAME?		#NAME?	#NAME?
O94842	TOX high mobility group box family member 4	TOX4	-3.81184	-4.33615	-4.69839	-4.00978	-3.62588	-6.66095	1.8974	-3.06114	-2.89386	-3.4279	1.53673	-4.19295	#NAME?	0.0768521		2.83355	#NAME?	#NAME?		#NAME?	#NAME?
Q12789	General transcription factor 3C polypeptide 1	GTF3C1	-1.03304	-1.77011	4.00055	-1.38522	-6.62563	-3.69227	1.01963	1.21967	2.09359	2.46869	3.08854	3.97287	#NAME?	0.025995		4.06145	#NAME?	#NAME?		#NAME?	#NAME?
Q9H267	Vacuolar protein sorting-associated protein 33B	VPS33B	-0.569087	-2.61675	-2.05995	-2.37589	-2.84841	-2.09495	1.72384	-0.386437	1.20155	1.25889	1.65877	-2.39791	#NAME?	0.152295		2.60396	#NAME?	#NAME?		#NAME?	#NAME?
Q6P3W7	SCY1-like protein 2	SCYL2	5.50366	1.25716	-0.547641	-0.279485	-1.22113	-0.29344	0.318269	5.3291	6.04266	5.95367	0.661575	6.54842	#NAME?	0.758615		3.40576	#NAME?	#NAME?		#NAME?	#NAME?
Q96F24	Nuclear receptor-binding factor 2	NRBF2	-2.28683	-6.17831	-6.54402	-6.44969	-2.57192	-6.63579	-1.97056	-2.49637	-1.67898	-1.16258	-1.98453	-2.63757	#NAME?	0.010044		3.12266	#NAME?	#NAME?		#NAME?	#NAME?
Q9H269	Vacuolar protein sorting-associated protein 16 homolog	VPS16	-1.85585	-1.9069	-1.89017	-1.79342	-1.96974	-1.65748	3.67815	-1.56442	-1.27991	-1.46155	4.17954	-1.62137	#NAME?	9.63106e-07		2.16733	#NAME?	#NAME?		#NAME?	#NAME?
O15234	Protein CASC3	CASC3	-1.21965	-2.46654	-2.86137	-2.71848	-1.86562	-3.04442	-1.12669	-0.473526	-0.613301	-0.995977	0.372891	-0.657766	#NAME?	0.566418		1.78029	#NAME?	#NAME?		#NAME?	#NAME?
P02671	Fibrinogen alpha chain	FGA	1.68619	-0.965013	0.440482	0.591248	1.3167	2.47659	4.31082	2.48006	2.48167	3.11163	5.53647	2.70924	#NAME?	0.933426		2.51395	#NAME?	#NAME?		#NAME?	#NAME?
Q5U5X0	Complex III assembly factor LYRM7	LYRM7	-0.35639	-1.32289	-0.485106	0.545264	-0.843207	-0.663345	1.27926	1.23343	1.0747	1.11833	1.66937	1.05462	#NAME?	0.0469864		1.75923	#NAME?	#NAME?		#NAME?	#NAME?
O60583	Cyclin-T2	CCNT2	-1.25299	-6.16711	-1.47552	-6.41821	-3.61283	-3.52787	0.956865	0.452838	-6.36571	0.254811	1.86653	0.474083	#NAME?	0.526793		3.34899	#NAME?	#NAME?		#NAME?	#NAME?
P17707	S-adenosylmethionine decarboxylase proenzyme	AMD1	-5.76304	-4.9267	-4.34782	-4.374	-3.64667	-6.98942	0.388077	-2.79326	-2.67941	-3.33723	0.861689	-4.34399	#NAME?	0.24054		3.02392	#NAME?	#NAME?		#NAME?	#NAME?
Q5VWZ2	Lysophospholipase-like protein 1	LYPLAL1	-0.12644	-0.70564	-1.37262	-0.884749	-0.264338	-1.43035	1.33742	1.14593	-0.0755553	0.81675	1.2675	0.63976	#NAME?	0.952538		1.65266	#NAME?	#NAME?		#NAME?	#NAME?
Q16651	Prostasin	PRSS8	-2.28235	-0.970719	-0.803081	-2.67547	-1.88516	-2.34993	-0.825871	-0.197513	0.349491	0.720277	0.704755	-0.393434	#NAME?	0.667868		1.8874	#NAME?	#NAME?		#NAME?	#NAME?
Q96CS7	Pleckstrin homology domain-containing family B member 2	PLEKHB2	-2.42259	-4.6641	-6.39197	-6.46685	-2.40292	-6.56564	-1.30759	-2.85133	-1.22645	-2.40491	-1.34803	-2.03957	#NAME?	0.0330497		2.95603	#NAME?	#NAME?		#NAME?	#NAME?
P18206	Vinculin	VCL	1.38382	2.24865	2.34376	2.2382	-0.600064	2.30447	3.39594	2.43837	4.39036	4.03145	4.78278	4.33737	#NAME?	0.510608		2.24291	#NAME?	#NAME?		#NAME?	#NAME?
Q14008	Cytoskeleton-associated protein 5	CKAP5	-0.481287	-0.370943	0.296861	-0.354101	-0.15343	2.7089	1.80263	1.94657	2.38053	2.37843	3.38849	2.78134	#NAME?	0.125497		2.172	#NAME?	#NAME?		#NAME?	#NAME?
O15270	Serine palmitoyltransferase 2	SPTLC2	-6.28113	-3.51912	-4.4958	-2.72538	-4.58481	-4.63131	-1.61576	-2.9245	-1.99745	-2.36244	-0.633222	-3.00017	#NAME?	0.525654		2.284	#NAME?	#NAME?		#NAME?	#NAME?
O75663	TIP41-like protein	TIPRL	2.59564	-1.32645	-1.47788	-1.4921	2.81495	-1.64237	2.86299	2.65215	3.13584	3.02214	3.36283	3.07014	#NAME?	0.000181391		3.10571	#NAME?	#NAME?		#NAME?	#NAME?
O43719	HIV Tat-specific factor 1	HTATSF1	-1.91154	-0.967752	-1.56759	-2.1837	-2.52137	-2.18312	0.964993	-1.5265	1.10392	0.924907	1.00308	-0.606845	#NAME?	0.153106		2.19977	#NAME?	#NAME?		#NAME?	#NAME?
P08174	Complement decay-accelerating factor	CD55	-1.57068	-3.61098	-4.63438	-5.0236	-6.34694	-5.18172	-1.95574	-2.29458	-1.80439	-1.58594	-1.43583	-1.21232	#NAME?	0.00653232		2.67992	#NAME?	#NAME?		#NAME?	#NAME?
Q9Y232	Chromodomain Y-like protein	CDYL	-3.08014	-6.17732	-6.28228	-6.31603	-5.30942	-4.11856	-0.445383	-2.91733	0.429488	-1.18185	-1.78793	-6.43606	#NAME?	0.220006		3.15745	#NAME?	#NAME?		#NAME?	#NAME?
Q9UBS0	Ribosomal protein S6 kinase beta-2	RPS6KB2	-3.01272	-4.26938	-3.21141	-3.08226	-2.83076	-3.62682	-1.47174	-1.82766	-2.16846	-1.38558	-1.50785	-2.50236	#NAME?	0.71881		1.52828	#NAME?	#NAME?		#NAME?	#NAME?
Q5T200	Zinc finger CCCH domain-containing protein 13	ZC3H13	-6.27021	-6.29128	-6.52721	-6.45381	-3.83152	-6.477	1.20832	-5.64462	-5.08572	-5.60834	1.03052	-4.9791	#NAME?	0.0243439		2.79535	#NAME?	#NAME?		#NAME?	#NAME?
P02750	Leucine-rich alpha-2-glycoprotein	LRG1	-5.79718	-4.94511	-6.00582	-5.14143	-4.49766	-3.52426	-5.53849	-2.93591	-0.589523	-0.896769	-2.99152	-0.573624	#NAME?	0.115025		2.73094	#NAME?	#NAME?		#NAME?	#NAME?
O14908	PDZ domain-containing protein GIPC1	GIPC1	-1.26271	-1.40478	-2.05397	-1.38941	-2.38243	-2.54303	0.0596618	-0.219592	-0.726148	-0.37002	-0.350041	-0.712035	#NAME?	0.19854		1.45303	#NAME?	#NAME?		#NAME?	#NAME?
Q9H334	Forkhead box protein P1	FOXP1	-6.20739	-6.39499	-6.36867	-6.33217	-6.38724	-6.65888	-3.91475	-4.18449	-2.83551	-2.98203	-3.16348	-6.51934	#NAME?	0.000150425		2.45829	#NAME?	#NAME?		#NAME?	#NAME?
Q13472	DNA topoisomerase 3-alpha	TOP3A	-5.88682	-4.8523	-5.63876	-2.66383	-4.61312	-6.446	0.314323	-1.95234	-5.57794	-3.15231	1.34502	-2.2552	#NAME?	0.201354		3.13706	#NAME?	#NAME?		#NAME?	#NAME?
Q13889	General transcription factor IIH subunit 3	GTF2H3	-2.52664	-3.41478	-2.25832	-3.06214	-2.14565	-3.75438	-2.03118	-0.855821	0.581971	0.980362	-2.51829	0.70799	#NAME?	0.0901158		2.33782	#NAME?	#NAME?		#NAME?	#NAME?
Q96BW5	Phosphotriesterase-related protein	PTER	-0.65398	-1.98518	-2.40893	-2.03258	-0.166748	-1.37777	4.86825	0.01831	-1.22979	0.590364	0.369857	0.406859	#NAME?	0.0802554		2.27484	#NAME?	#NAME?		#NAME?	#NAME?
Q96AX1	Vacuolar protein sorting-associated protein 33A	VPS33A	-3.74244	-5.08597	-6.26138	-4.37056	-0.709199	-6.64735	2.68063	-1.97531	-2.41624	-2.97629	4.45946	-3.9005	#NAME?	0.332844		3.78144	#NAME?	#NAME?		#NAME?	#NAME?
Q9UDY8	Mucosa-associated lymphoid tissue lymphoma translocation protein 1	MALT1	-1.93714	-2.39853	-5.40114	-3.50185	-2.48762	-2.69193	0.801408	-1.18189	-0.73428	-0.706827	-2.63523	0.412322	#NAME?	0.95885		2.39562	#NAME?	#NAME?		#NAME?	#NAME?
Q969Q5	Ras-related protein Rab-24	RAB24	-3.11766	-0.882838	-1.50921	-1.55487	-1.47958	-2.4293	-0.0554699	0.0460813	0.0677323	0.177495	0.286285	-0.293043	#NAME?	0.00849124		1.86709	#NAME?	#NAME?		#NAME?	#NAME?
P12235	ADP/ATP translocase 1	SLC25A4	0.534897	0.884778	0.172811	-0.0618026	-1.14334	-0.00236042	2.73232	1.30029	1.28478	1.63796	3.45158	1.28258	#NAME?	0.537572		1.88409	#NAME?	#NAME?		#NAME?	#NAME?
O15530	3-phosphoinositide-dependent protein kinase 1	PDPK1	-0.820173	-1.35221	-1.07248	-1.13098	-0.430181	-0.466319	2.23922	0.987898	-0.55187	0.915036	2.87755	1.51005	#NAME?	0.0238544		2.20837	#NAME?	#NAME?		#NAME?	#NAME?
O15066	Kinesin-like protein KIF3B	KIF3B	-3.69024	-6.24001	-2.72766	-2.2967	-5.00981	-6.56748	-2.80053	-2.83388	-0.0927432	0.190787	-3.75679	0.465853	#NAME?	0.94492		2.95077	#NAME?	#NAME?		#NAME?	#NAME?
Q14571	Inositol 1,4,5-trisphosphate receptor type 2	ITPR2	-0.924319	-3.92196	-3.2656	-5.9945	-1.5183	-4.21724	-0.942062	-1.95371	0.416729	1.49103	0.601255	-2.40229	#NAME?	0.693485		2.84214	#NAME?	#NAME?		#NAME?	#NAME?
Q76FK4	Nucleolar protein 8	NOL8	-6.17466	-0.360569	-3.73919	-6.23237	-6.74197	-2.00051	-1.53942	0.469963	-1.20876	-0.775752	-1.72399	-0.987833	#NAME?	0.0190916		3.24725	#NAME?	#NAME?		#NAME?	#NAME?
Q9ULM6	CCR4-NOT transcription complex subunit 6	CNOT6	-1.56225	-2.09712	-1.59452	-1.92563	-1.52374	-1.81832	-0.494109	-0.721655	-0.398128	-0.340054	-0.272777	-1.24226	#NAME?	0.349395		1.17543	#NAME?	#NAME?		#NAME?	#NAME?
O75629	Protein CREG1	CREG1	-2.12727	-2.48198	-1.95618	-2.36508	-1.92094	-2.57528	-0.196654	0.327637	-0.118873	0.0984804	-1.50524	-1.32321	#NAME?	0.042303		1.78481	#NAME?	#NAME?		#NAME?	#NAME?
Q13825	Methylglutaconyl-CoA hydratase, mitochondrial	AUH	0.0338433	0.766189	0.521926	1.08458	1.95866	1.24967	4.52889	-0.86021	4.98084	5.11679	6.13254	4.99438	#NAME?	0.0107822		3.21306	#NAME?	#NAME?		#NAME?	#NAME?
P36507	Dual specificity mitogen-activated protein kinase kinase 2	MAP2K2	2.81792	2.48484	2.6723	2.70909	2.25821	2.54719	6.76906	2.80583	3.2785	3.28218	7.78765	3.61339	#NAME?	7.3768e-05		2.00784	#NAME?	#NAME?		#NAME?	#NAME?
O75717	WD repeat and HMG-box DNA-binding protein 1	WDHD1	-4.35978	-6.25503	-6.54932	-6.31959	-6.35659	-6.42637	0.505375	-3.25086	-3.05066	-3.3604	-2.79784	-6.524	#NAME?	0.0491562		2.96472	#NAME?	#NAME?		#NAME?	#NAME?
O60826	Coiled-coil domain-containing protein 22	CCDC22	-1.84507	-2.21074	-1.83146	-1.62614	-0.955563	-1.42889	0.101624	-0.76288	0.0178624	0.399261	0.262167	-0.981838	#NAME?	0.543261		1.48901	#NAME?	#NAME?		#NAME?	#NAME?
Q9NWX6	Probable tRNA(His) guanylyltransferase	THG1L	1.95636	-0.966414	-1.00257	-1.23475	-1.35947	-1.84827	0.145122	2.30124	2.58317	2.8774	-0.304208	3.33965	#NAME?	0.812554		2.56625	#NAME?	#NAME?		#NAME?	#NAME?
P46379	Large proline-rich protein BAG6	BAG6	3.10024	0.371622	0.75439	0.20397	1.0028	0.313085	1.96555	2.98742	3.29458	3.23983	2.80834	2.99187	#NAME?	0.0978012		1.92358	#NAME?	#NAME?		#NAME?	#NAME?
Q5JS37	NHL repeat-containing protein 3	NHLRC3	-2.4332	-2.74378	-2.25432	-2.45851	-2.1064	-3.39992	-1.29929	0.109126	-0.747723	-0.734902	-2.03015	-1.0249	#NAME?	0.369752		1.61138	#NAME?	#NAME?		#NAME?	#NAME?
Q86VR2	Reticulophagy regulator 3	RETREG3	3.05793	-0.500362	-0.941668	-0.90963	-0.569544	-0.716265	0.463114	2.93003	4.84265	4.53052	-0.459179	6.24588	#NAME?	0.27312		3.18876	#NAME?	#NAME?		#NAME?	#NAME?
P05412	Transcription factor AP-1	JUN	-1.28355	-2.43191	-3.10603	-2.57959	-2.45525	-3.02839	-1.88416	-0.128286	-1.20287	-0.413919	-0.911938	0.178135	#NAME?	0.7526		1.75361	#NAME?	#NAME?		#NAME?	#NAME?
Q9BPX6	Calcium uptake protein 1, mitochondrial	MICU1	-2.1812	-3.7864	-3.55208	-4.08944	-2.18084	-2.49272	-1.14145	-1.65071	-1.56932	-1.35198	-1.67081	-0.792098	#NAME?	0.0666164		1.68438	#NAME?	#NAME?		#NAME?	#NAME?
P31949	Protein S100-A11	S100A11	1.33568	-5.08657	-1.88698	-4.22112	-6.58686	-0.0350053	-0.716391	1.73304	1.25382	1.13005	0.0836098	0.791588	#NAME?	0.0165964		3.45943	#NAME?	#NAME?		#NAME?	#NAME?
Q96HY7	Probable 2-oxoglutarate dehydrogenase E1 component DHKTD1, mitochondrial	DHTKD1	-2.97139	-2.54542	-3.04792	-2.22863	-2.90182	-2.72721	-1.96062	-1.43062	-1.69003	-1.08524	-0.632647	-1.68415	#NAME?	0.345339		1.32318	#NAME?	#NAME?		#NAME?	#NAME?
P33947	ER lumen protein-retaining receptor 2	KDELR2	0.468252	-0.59287	-0.84687	-0.831781	-1.76636	-1.67895	1.18708	0.399006	1.22128	0.706276	1.22268	0.147209	#NAME?	0.249957		1.68868	#NAME?	#NAME?		#NAME?	#NAME?
P82673	28S ribosomal protein S35, mitochondrial	MRPS35	-0.128151	0.343661	0.855062	0.394854	0.504456	0.324326	1.92909	0.424986	2.23377	2.24971	2.79882	2.52761	#NAME?	0.0525882		1.64496	#NAME?	#NAME?		#NAME?	#NAME?
Q8N1G2	Cap-specific mRNA (nucleoside-2'-O-)-methyltransferase 1	CMTR1	-0.108685	-0.582116	-0.217353	-0.0012714	-0.401993	-0.509324	3.50569	0.528815	0.690314	0.544087	2.94709	0.641366	#NAME?	0.00134235		1.77969	#NAME?	#NAME?		#NAME?	#NAME?
Q9UHB7	AF4/FMR2 family member 4	AFF4	-0.52219	-6.36564	-5.00556	-6.21686	0.0516413	-4.77181	0.0889179	-0.689035	-0.170545	-0.79079	-0.540478	-0.868537	#NAME?	0.000422308		3.30999	#NAME?	#NAME?		#NAME?	#NAME?
P04899	Guanine nucleotide-binding protein G(i) subunit alpha-2	GNAI2	2.79625	2.46343	2.26183	2.56834	2.32339	2.47785	3.6187	2.91498	3.56674	3.80166	4.14511	3.9422	#NAME?	0.102081		1.18305	#NAME?	#NAME?		#NAME?	#NAME?
Q8N8J6	Zinc finger protein 615	ZNF615	-6.22488	-6.25068	-4.15884	-6.30617	-6.47496	-6.44628	-2.89619	-3.15453	-3.58054	-3.78005	-0.1183	-6.52036	#NAME?	0.0938292		2.63531	#NAME?	#NAME?		#NAME?	#NAME?
Q8WUX2	Glutathione-specific gamma-glutamylcyclotransferase 2	CHAC2	-1.87127	-6.1726	-6.2991	-6.02399	-6.43862	-0.813415	-1.82413	-1.4945	-0.0268247	-0.553198	-0.500939	-4.54876	#NAME?	0.354791		3.11178	#NAME?	#NAME?		#NAME?	#NAME?
Q9HAN9	Nicotinamide/nicotinic acid mononucleotide adenylyltransferase 1	NMNAT1	-1.46716	-3.2939	-1.09693	-1.18528	-0.46838	-0.703634	3.94061	-0.726192	-0.0875376	0.536636	4.27731	0.183903	#NAME?	0.116315		2.72333	#NAME?	#NAME?		#NAME?	#NAME?
Q9Y496	Kinesin-like protein KIF3A	KIF3A	0.0790905	-6.36108	-3.59646	-3.19646	0.16388	-4.61048	-2.05212	0.185906	0.615766	0.315846	-2.3468	0.429997	#NAME?	0.175437		2.44502	#NAME?	#NAME?		#NAME?	#NAME?
Q9Y375	Complex I intermediate-associated protein 30, mitochondrial	NDUFAF1	-3.08086	-2.94349	-2.60302	-2.38575	-3.76611	-2.23663	-1.72902	-1.89751	-1.67484	-1.50195	-2.60868	5.76107	#NAME?	0.00170252		2.22749	#NAME?	#NAME?		#NAME?	#NAME?
O14975	Very long-chain acyl-CoA synthetase	SLC27A2	3.30247	1.01197	0.561163	1.04345	4.19248	1.5847	3.90986	3.46196	3.93319	3.89746	5.07981	4.33916	#NAME?	0.053022		2.1542	#NAME?	#NAME?		#NAME?	#NAME?
Q13085	Acetyl-CoA carboxylase 1	ACACA	2.51117	0.890659	0.953277	0.665768	2.8198	0.629175	2.53998	2.2402	3.34126	3.74292	3.743	4.78283	#NAME?	0.886863		1.98672	#NAME?	#NAME?		#NAME?	#NAME?
Q8WVC0	RNA polymerase-associated protein LEO1	LEO1	-0.164799	0.352679	-0.255695	0.273552	-0.306897	0.524502	2.65283	0.0217418	1.91233	2.00529	2.098	1.7406	#NAME?	0.0634704		1.66791	#NAME?	#NAME?		#NAME?	#NAME?
Q71SY5	Mediator of RNA polymerase II transcription subunit 25	MED25	0.32945	-6.29349	-6.54265	-6.29513	1.04395	-6.64716	-6.44611	0.688526	1.12232	1.28848	-2.76821	1.32218	#NAME?	0.750604		3.2687	#NAME?	#NAME?		#NAME?	#NAME?
P52788	Spermine synthase	SMS	4.838	2.87353	3.67643	3.42921	3.46888	3.5663	4.96973	4.98033	5.10729	4.98545	5.56563	4.75757	#NAME?	0.0791809		1.41894	#NAME?	#NAME?		#NAME?	#NAME?
Q6ZMI0	Protein phosphatase 1 regulatory subunit 21	PPP1R21	-0.231177	-0.78924	-4.48172	-1.19546	-0.189776	-3.70611	0.858662	0.528407	0.58042	1.05604	0.327723	1.6534	#NAME?	0.0096115		2.59969	#NAME?	#NAME?		#NAME?	#NAME?
Q9Y6M4	Casein kinase I isoform gamma-3	CSNK1G3	-2.93481	-4.18713	-3.84865	-3.55601	-4.40383	-5.51186	-2.27491	-2.33702	-3.04924	-3.04912	-1.11129	-1.65084	#NAME?	0.784191		1.82831	#NAME?	#NAME?		#NAME?	#NAME?
O94907	Dickkopf-related protein 1	DKK1	-4.3606	-6.23497	-6.34134	-6.34486	-6.36936	-6.61063	-4.80796	-5.971	-3.96664	-3.54224	-2.18795	-2.78095	#NAME?	0.29765		2.1675	#NAME?	#NAME?		#NAME?	#NAME?
O95905	Protein ecdysoneless homolog	ECD	-2.56918	-2.54324	-2.38896	-6.48265	-6.38228	-6.64225	-0.688123	-1.98928	-2.46272	-2.37339	-0.309246	-2.91354	#NAME?	0.131012		2.71204	#NAME?	#NAME?		#NAME?	#NAME?
P54760	Ephrin type-B receptor 4	EPHB4	0.787559	-6.32116	-5.39198	-6.38094	-4.46309	-5.25659	-2.83555	1.01643	1.27739	1.42585	-6.98924	0.602645	#NAME?	0.631372		3.58729	#NAME?	#NAME?		#NAME?	#NAME?
Q8N8J7	Uncharacterized protein FAM241A	FAM241A	-4.24503	-6.34324	-3.24901	-6.29898	-2.38671	-6.56865	-2.22773	-3.32442	-2.38661	-1.63835	-2.03593	-2.22234	#NAME?	0.0227928		2.54271	#NAME?	#NAME?		#NAME?	#NAME?
Q6N069	N-alpha-acetyltransferase 16, NatA auxiliary subunit	NAA16	-5.47633	-4.81686	-6.42994	-6.45856	-3.10025	-6.60961	-4.8751	-2.30256	-2.44381	-1.87911	-2.92205	-4.51586	#NAME?	0.849128		2.32551	#NAME?	#NAME?		#NAME?	#NAME?
Q05209	Tyrosine-protein phosphatase non-receptor type 12	PTPN12	-0.277424	-4.61165	-3.2619	-4.67867	-0.409894	-4.3142	-0.771358	0.421566	-0.0246979	0.0639101	-2.10907	0.47796	#NAME?	0.12896		2.60201	#NAME?	#NAME?		#NAME?	#NAME?
Q6P1K2	Polyamine-modulated factor 1	PMF1	-2.9106	-1.88726	-3.17621	-2.66499	-3.28709	-3.62365	-1.40514	-1.7223	-0.8204	-0.528374	-0.775005	-2.51362	#NAME?	0.660951		1.63083	#NAME?	#NAME?		#NAME?	#NAME?
O00399	Dynactin subunit 6	DCTN6	-1.38241	-1.98052	-2.70132	-1.24476	-1.26307	-4.35452	2.6288	-1.81001	0.337647	0.66291	-1.42822	1.46013	#NAME?	0.484141		2.46298	#NAME?	#NAME?		#NAME?	#NAME?
Q12893	Transmembrane protein 115	TMEM115	-6.19939	-6.23498	-6.25582	-4.70582	-6.60275	-3.09531	-3.49645	-4.42781	-3.29384	-3.31903	-1.09057	-3.91814	#NAME?	0.717619		2.25804	#NAME?	#NAME?		#NAME?	#NAME?
Q9NV31	U3 small nucleolar ribonucleoprotein protein IMP3	IMP3	2.01008	0.493979	0.523964	0.183327	1.16825	0.106775	1.53486	2.01885	3.33835	3.39786	1.59055	3.79387	#NAME?	0.48124		1.86466	#NAME?	#NAME?		#NAME?	#NAME?
O75351	Vacuolar protein sorting-associated protein 4B	VPS4B	2.56717	0.189716	1.19214	0.24019	1.41932	1.44504	2.8999	2.07707	3.27318	3.01269	3.19011	3.20062	#NAME?	0.158389		1.76666	#NAME?	#NAME?		#NAME?	#NAME?
P78329	Cytochrome P450 4F2	CYP4F2	0.249976	0.158678	-5.08303	0.0534242	0.147713	-5.71427	0.590023	1.9077	2.40484	2.52387	0.178989	1.29626	#NAME?	0.0315723		3.18153	#NAME?	#NAME?		#NAME?	#NAME?
P01033	Metalloproteinase inhibitor 1	TIMP1	-2.0447	-2.26591	-2.09081	-1.74452	-4.59668	-1.4331	-3.53694	-0.188129	1.1959	1.12852	0.423788	2.62021	#NAME?	0.205189		2.63652	#NAME?	#NAME?		#NAME?	#NAME?
Q63HM1	Kynurenine formamidase	AFMID	-1.94934	-2.36931	-2.44111	-2.10759	-4.41691	-2.91246	-0.687848	-0.604967	-1.17714	-1.30613	-1.41877	-1.25431	#NAME?	0.0524781		1.62459	#NAME?	#NAME?		#NAME?	#NAME?
O95876	WD repeat-containing and planar cell polarity effector protein fritz homolog	WDPCP	-3.54358	-6.21855	-6.23791	-5.86125	-5.39038	-6.61842	-3.47472	-3.79203	-3.78986	-3.24184	-3.53669	-4.24723	#NAME?	0.0232406		1.96462	#NAME?	#NAME?		#NAME?	#NAME?
Q9P2I0	Cleavage and polyadenylation specificity factor subunit 2	CPSF2	3.27116	0.592094	0.102112	0.847638	-0.31729	1.50605	3.6766	3.51742	3.13962	2.96793	2.72871	2.41165	#NAME?	0.0494089		2.07336	#NAME?	#NAME?		#NAME?	#NAME?
O75962	Triple functional domain protein	TRIO	-3.70707	-3.52874	-6.54672	-3.7117	-5.72873	-5.19083	0.468292	-3.70314	-3.41343	-2.69402	1.09118	-3.91243	#NAME?	0.243624		2.70838	#NAME?	#NAME?		#NAME?	#NAME?
O75695	Protein XRP2	RP2	-2.08556	-2.00078	-2.01967	-3.12889	-2.91308	-4.1305	-1.56026	-1.5701	-1.1077	-1.0464	-0.0605007	-1.07559	#NAME?	0.362209		1.64299	#NAME?	#NAME?		#NAME?	#NAME?
P28370	Probable global transcription activator SNF2L1	SMARCA1	4.86574	3.03889	1.02168	4.10527	0.841532	3.83321	3.08253	4.72607	6.44338	6.46815	4.72484	7.78727	#NAME?	0.991697		2.58765	#NAME?	#NAME?		#NAME?	#NAME?
Q5JUK3	Potassium channel subfamily T member 1	KCNT1	0.408384	0.119923	1.15826	0.197709	0.14346	-0.17079	3.08552	0.0096115	3.11279	2.92597	3.83523	3.503	#NAME?	0.0293936		2.43586	#NAME?	#NAME?		#NAME?	#NAME?
P10909	Clusterin	CLU	3.92369	3.29376	3.79004	3.62423	3.75862	3.7552	4.62995	4.27828	5.36874	5.37663	6.23133	5.69129	#NAME?	0.0210756		1.57178	#NAME?	#NAME?		#NAME?	#NAME?
Q9UQB8	Brain-specific angiogenesis inhibitor 1-associated protein 2	BAIAP2	-0.107782	-0.0330652	-0.0512205	-0.349766	-2.69046	-0.978825	3.70234	1.14772	0.933938	0.747185	3.39738	-0.385448	#NAME?	0.35629		2.29237	#NAME?	#NAME?		#NAME?	#NAME?
Q9Y6X9	ATPase MORC2	MORC2	1.17068	-1.99929	-2.63368	-2.36245	-1.95666	-3.0509	-1.93963	1.30665	1.48895	1.32732	-0.338909	1.73956	#NAME?	0.921318		2.4027	#NAME?	#NAME?		#NAME?	#NAME?
P37235	Hippocalcin-like protein 1	HPCAL1	-1.28006	-1.85904	-2.41235	-2.64325	-2.06248	-6.63455	-1.48782	0.259837	0.195354	0.574874	-2.63182	0.520112	#NAME?	0.426676		2.38704	#NAME?	#NAME?		#NAME?	#NAME?
Q9NXH9	tRNA (guanine(26)-N(2))-dimethyltransferase	TRMT1	0.758455	-0.381377	-0.596815	-0.819172	-0.477145	-1.45641	1.754	0.703127	0.747621	0.947211	1.81819	0.376014	#NAME?	0.672697		1.5531	#NAME?	#NAME?		#NAME?	#NAME?
Q9HCM4	Band 4.1-like protein 5	EPB41L5	-0.433402	-1.18001	-0.443685	-0.555705	0.0345423	-0.543307	1.54347	0.321464	0.316954	0.685199	0.95939	0.534763	#NAME?	0.698815		1.24714	#NAME?	#NAME?		#NAME?	#NAME?
Q8WWK9	Cytoskeleton-associated protein 2	CKAP2	-6.25119	-6.3907	-6.55286	-6.50005	-6.5298	-6.44815	-6.416	-3.54874	-4.16436	-4.58375	-4.77714	-4.3041	#NAME?	0.000209711		1.81311	#NAME?	#NAME?		#NAME?	#NAME?
Q8TEB1	DDB1- and CUL4-associated factor 11	DCAF11	-1.44459	-4.10971	-4.9147	-6.48356	-6.54442	-3.51862	-2.45998	-0.974918	-2.52405	-2.12833	-1.52525	-2.47315	#NAME?	0.0282503		2.48832	#NAME?	#NAME?		#NAME?	#NAME?
Q9Y256	CAAX prenyl protease 2	RCE1	-0.400564	-2.25772	-0.740872	-1.10156	-6.45776	-2.117	-0.22431	-0.480661	-0.282698	-0.652338	2.07047	-0.822815	#NAME?	0.1344		2.11385	#NAME?	#NAME?		#NAME?	#NAME?
P09382	Galectin-1	LGALS1	3.27248	3.17216	3.46954	3.25442	2.0075	3.53305	4.9292	4.48609	4.63134	4.32707	4.23646	3.86425	#NAME?	0.361231		1.29421	#NAME?	#NAME?		#NAME?	#NAME?
Q9H2J4	Phosducin-like protein 3	PDCL3	-1.36157	-1.90993	-4.2973	-4.55335	-1.86813	-6.61307	-1.11259	-1.30856	-0.887888	-1.16147	-1.34662	-3.27166	#NAME?	0.0841932		1.91909	#NAME?	#NAME?		#NAME?	#NAME?
Q9NXF7	DDB1- and CUL4-associated factor 16	DCAF16	-6.28496	-2.23093	-3.84314	-2.70038	-6.38482	-6.41331	-0.692788	-2.53416	-0.2227	-0.735945	-6.79578	0.0245094	#NAME?	0.548821		2.81678	#NAME?	#NAME?		#NAME?	#NAME?
P05161	Ubiquitin-like protein ISG15	ISG15	2.59873	2.39947	2.1501	2.30967	2.62342	1.97162	3.30147	3.09035	3.64662	3.36933	3.86928	2.95756	#NAME?	0.538614		1.03026	#NAME?	#NAME?		#NAME?	#NAME?
P31431	Syndecan-4	SDC4	-0.623876	-1.04	-0.119384	-0.541951	-0.356789	-1.06875	0.18124	-0.221769	1.23724	0.7384	0.973908	1.04802	#NAME?	0.389968		1.28463	#NAME?	#NAME?		#NAME?	#NAME?
Q9H1Y0	Autophagy protein 5	ATG5	-2.13376	-4.34658	-4.42507	-6.05561	-3.57902	-3.79202	-2.50427	-2.20732	-1.58122	-1.47112	-3.57871	-1.03202	#NAME?	0.47312		1.9929	#NAME?	#NAME?		#NAME?	#NAME?
Q8NBM8	Prenylcysteine oxidase-like	PCYOX1L	-6.2675	-6.25989	-6.2869	-6.31769	-6.56667	-6.61712	-3.69661	-2.23982	-4.51823	-3.50468	-4.97496	-6.52171	#NAME?	0.000172465		2.14329	#NAME?	#NAME?		#NAME?	#NAME?
Q99470	Stromal cell-derived factor 2	SDF2	1.17489	-0.213573	-0.367888	-0.475374	0.736594	-0.468608	1.49998	1.80504	1.75673	1.47198	1.21138	0.927122	#NAME?	0.121231		1.38103	#NAME?	#NAME?		#NAME?	#NAME?
Q8IUI8	Cytokine receptor-like factor 3	CRLF3	-3.91742	-3.60896	-3.59235	-3.40312	-6.4589	-3.39164	-3.3951	-2.94719	-3.32524	-2.52357	-3.03541	0.214146	#NAME?	0.768364		1.56	#NAME?	#NAME?		#NAME?	#NAME?
O60318	Germinal-center associated nuclear protein	MCM3AP	-3.80276	-4.50053	-3.24727	-3.49873	-6.46809	-3.54308	-3.89931	-2.6705	0.17047	-1.35068	-2.77748	-1.45036	#NAME?	0.721927		2.18043	#NAME?	#NAME?		#NAME?	#NAME?
P07305	Histone H1.0	H1F0	4.76001	4.54175	4.88669	4.5983	5.16872	4.46019	5.72587	5.28585	5.80239	5.73485	6.38796	5.68114	#NAME?	0.523044		1.03373	#NAME?	#NAME?		#NAME?	#NAME?
O75530	Polycomb protein EED	EED	-3.60143	-3.06734	-6.49399	-6.24703	-2.80469	-6.53613	1.26607	-3.62144	-2.16482	-3.59424	1.4372	-3.9192	#NAME?	0.500696		3.02569	#NAME?	#NAME?		#NAME?	#NAME?
P25686	DnaJ homolog subfamily B member 2	DNAJB2	-2.64798	-2.78203	-2.94016	-2.20598	-1.72993	-3.54749	0.496503	-2.63461	-1.41043	-0.990607	1.0479	-0.944858	#NAME?	0.121994		1.90291	#NAME?	#NAME?		#NAME?	#NAME?
Q5TGZ0	MICOS complex subunit MIC10	MICOS10	1.2877	1.88938	1.60944	2.07539	-0.404492	1.79221	2.80053	1.88604	3.07588	3.1357	3.70414	3.47394	#NAME?	0.448304		1.63777	#NAME?	#NAME?		#NAME?	#NAME?
Q9H6Y2	WD repeat-containing protein 55	WDR55	0.0582294	0.289925	-1.71744	-0.0827499	-3.0734	-2.70908	0.647698	-0.362893	0.871358	0.521722	1.2682	2.16356	#NAME?	0.233046		2.05736	#NAME?	#NAME?		#NAME?	#NAME?
A8MXV4	Nucleoside diphosphate-linked moiety X motif 19	NUDT19	0.782943	0.564238	-0.149633	0.44543	0.424393	-0.37662	2.25611	0.498778	1.71802	1.45054	2.23955	1.69977	#NAME?	0.437189		1.362	#NAME?	#NAME?		#NAME?	#NAME?
P45985	Dual specificity mitogen-activated protein kinase kinase 4	MAP2K4	0.277905	-0.316355	-0.491281	-0.423882	-1.31542	-0.602246	1.43974	0.0302995	1.01992	0.313754	2.28821	1.07613	#NAME?	0.341711		1.50656	#NAME?	#NAME?		#NAME?	#NAME?
Q96TA1	Protein Niban 2	NIBAN2	-0.441644	-0.351697	-0.225734	-0.983867	-0.54218	-1.82111	0.728085	0.101674	0.288577	0.171305	0.173248	2.51169	#NAME?	0.34536		1.39013	#NAME?	#NAME?		#NAME?	#NAME?
Q6P4E1	Protein CASC4	CASC4	-2.44886	-1.97764	-2.36785	-2.96267	-4.61294	-3.15767	-2.70189	-0.756896	-0.589703	-0.713263	-1.01076	-0.991751	#NAME?	0.723389		1.7939	#NAME?	#NAME?		#NAME?	#NAME?
Q00577	Transcriptional activator protein Pur-alpha	PURA	2.66864	1.0021	0.715156	0.448138	0.943841	0.841941	2.99001	2.45346	2.68553	2.49367	2.84148	2.48682	#NAME?	0.0139158		1.55519	#NAME?	#NAME?		#NAME?	#NAME?
Q15800	Methylsterol monooxygenase 1	MSMO1	0.586554	-0.254744	0.282365	-0.0802564	-0.150112	0.144399	1.19196	0.721306	1.05489	1.60302	1.47518	0.799897	#NAME?	0.795828		1.05301	#NAME?	#NAME?		#NAME?	#NAME?
Q9BV44	THUMP domain-containing protein 3	THUMPD3	-0.355527	-0.549637	-0.774468	-0.240107	-0.760678	-1.0632	0.100015	0.097514	0.496798	0.453496	0.823709	0.203055	#NAME?	0.890759		0.986368	#NAME?	#NAME?		#NAME?	#NAME?
O75131	Copine-3	CPNE3	1.34035	1.5062	0.279231	1.06911	-0.726621	1.0834	2.43069	1.68505	2.08274	2.13385	3.32842	2.12133	#NAME?	0.390091		1.5384	#NAME?	#NAME?		#NAME?	#NAME?
Q96JY6	PDZ and LIM domain protein 2	PDLIM2	-6.24847	-2.70626	-1.6426	-6.44111	-6.53869	-6.64581	-6.44044	-1.81466	-0.81105	-0.593079	-3.33385	0.549603	#NAME?	0.816573		2.96325	#NAME?	#NAME?		#NAME?	#NAME?
Q9UBC2	Epidermal growth factor receptor substrate 15-like 1	EPS15L1	-0.267961	-2.29763	-1.60313	-1.46603	-0.380569	-1.68845	0.560139	0.271598	-0.388085	-0.397219	1.57643	0.218769	#NAME?	0.852011		1.5909	#NAME?	#NAME?		#NAME?	#NAME?
Q86X29	Lipolysis-stimulated lipoprotein receptor	LSR	0.0993769	-0.639883	-0.776835	-1.15675	0.0601291	-0.835436	0.23465	0.440209	0.860301	1.015	0.383507	0.878593	#NAME?	0.332365		1.17694	#NAME?	#NAME?		#NAME?	#NAME?
Q9H1P3	Oxysterol-binding protein-related protein 2	OSBPL2	-4.00203	-7.55945	-3.49793	-3.88919	-6.54586	-5.30442	-2.19695	-3.66401	-3.26495	-4.58263	-2.09159	-1.8722	#NAME?	0.373133		2.18776	#NAME?	#NAME?		#NAME?	#NAME?
Q15477	Helicase SKI2W	SKIV2L	2.48174	2.1855	2.86389	3.01844	2.75825	2.98312	4.26999	2.64342	4.1082	4.1243	4.83806	4.65383	#NAME?	0.0778278		1.39114	#NAME?	#NAME?		#NAME?	#NAME?
Q96E29	Transcription termination factor 3, mitochondrial	MTERF3	-6.22397	-6.40163	-6.30751	-6.44892	-6.56734	-6.53256	-3.61419	-3.43232	-6.35658	-2.30154	-0.0532787	-6.53269	#NAME?	4.62533e-06		2.69856	#NAME?	#NAME?		#NAME?	#NAME?
Q8TF68	Zinc finger protein 384	ZNF384	-2.27908	-1.97298	-2.33362	-1.79738	-2.29014	-3.93742	-1.04638	-1.60483	-1.03477	-0.834164	0.26041	-1.25555	#NAME?	0.689097		1.51589	#NAME?	#NAME?		#NAME?	#NAME?
Q7Z7L7	Protein zer-1 homolog	ZER1	0.638204	-1.42197	-0.601319	-0.953553	-0.670243	-0.416059	0.362814	0.11004	1.95037	0.58707	1.96707	0.981386	#NAME?	0.747197		1.56395	#NAME?	#NAME?		#NAME?	#NAME?
Q15418	Ribosomal protein S6 kinase alpha-1	RPS6KA1	1.6063	0.521327	2.07251	0.822166	0.846488	0.238305	1.39243	4.48212	5.78102	5.79647	2.09819	1.41477	#NAME?	0.0284933		2.47632	#NAME?	#NAME?		#NAME?	#NAME?
P61221	ATP-binding cassette sub-family E member 1	ABCE1	2.6143	0.987064	0.997117	1.0978	0.992625	1.19883	4.28882	2.63861	2.28088	1.8512	4.20743	2.67978	#NAME?	0.333915		1.6765	#NAME?	#NAME?		#NAME?	#NAME?
Q9HD40	O-phosphoseryl-tRNA(Sec) selenium transferase	SEPSECS	-6.16629	-6.38257	-6.53023	-3.54215	-6.61087	-6.45909	-3.15277	-1.88435	-6.23106	-1.02798	-1.02129	-6.51841	#NAME?	0.127815		2.64256	#NAME?	#NAME?		#NAME?	#NAME?
Q01415	N-acetylgalactosamine kinase	GALK2	0.733149	-0.171785	0.108859	-0.216455	-0.46495	-0.435411	1.29282	0.520154	1.45413	0.828528	2.09273	0.991131	#NAME?	0.658824		1.27102	#NAME?	#NAME?		#NAME?	#NAME?
Q69YN4	Protein virilizer homolog	VIRMA	-1.85147	-3.03468	-2.95846	-4.49398	-6.47758	-4.39106	-1.08491	-2.25716	-1.71885	-1.46701	-1.47829	-2.91446	#NAME?	0.0715838		2.04776	#NAME?	#NAME?		#NAME?	#NAME?
P07477	Trypsin-1	PRSS1	-1.92425	-6.39185	-6.28236	-1.92488	-6.56245	-6.49291	-6.34285	0.532626	0.617807	0.839721	-6.83166	0.967057	#NAME?	0.309234		3.2269	#NAME?	#NAME?		#NAME?	#NAME?
P04003	C4b-binding protein alpha chain	C4BPA	-0.91469	-2.00071	-1.7255	-2.34035	-0.922157	-3.08746	-0.842735	-0.78272	-0.612551	-0.595635	0.317255	-0.457606	#NAME?	0.155284		1.33615	#NAME?	#NAME?		#NAME?	#NAME?
Q9Y2R9	28S ribosomal protein S7, mitochondrial	MRPS7	1.3542	1.5104	1.24291	1.62786	1.75635	0.747233	2.8641	1.19118	3.41701	3.19581	3.86058	3.76488	#NAME?	0.0449082		1.67577	#NAME?	#NAME?		#NAME?	#NAME?
Q9NX09	DNA damage-inducible transcript 4 protein	DDIT4	-2.55283	-2.53976	-2.76244	-2.58187	-2.33606	-2.63471	-1.99635	-1.64564	-1.41428	-1.82356	-1.60363	-2.05309	#NAME?	0.238291		0.81185	#NAME?	#NAME?		#NAME?	#NAME?
Q9H9A5	CCR4-NOT transcription complex subunit 10	CNOT10	-1.3014	-2.94985	-1.49444	-3.03545	-1.34582	-1.77255	0.984665	-1.3023	0.62384	0.220894	0.45082	-1.94011	#NAME?	0.416817		1.82289	#NAME?	#NAME?		#NAME?	#NAME?
Q92747	Actin-related protein 2/3 complex subunit 1A	ARPC1A	-2.69267	-2.16081	-2.90803	-1.54632	-1.86499	-3.46801	1.24719	-2.33093	-0.869405	-1.07444	1.55013	-1.21117	#NAME?	0.122345		1.99203	#NAME?	#NAME?		#NAME?	#NAME?
O95487	Protein transport protein Sec24B	SEC24B	-1.27509	-1.83662	-1.12493	-1.71672	-0.409703	-1.35013	0.183696	-2.25049	1.96752	1.79965	2.87624	1.36448	#NAME?	0.0142027		2.27571	#NAME?	#NAME?		#NAME?	#NAME?
A2RU67	Protein FAM234B	FAM234B	-6.29869	-3.98402	-2.98106	-6.25288	-6.55796	-5.78122	-5.42804	-4.61076	-1.17721	-0.798856	-5.46354	-0.617412	#NAME?	0.313462		2.29334	#NAME?	#NAME?		#NAME?	#NAME?
Q9BVV7	Mitochondrial import inner membrane translocase subunit Tim21	TIMM21	-5.77534	-3.15637	-3.23842	-2.50675	-3.11023	-3.97439	-1.71707	-3.3759	-1.28835	-1.727	-0.675266	-1.91404	#NAME?	0.598756		1.84398	#NAME?	#NAME?		#NAME?	#NAME?
Q9Y6K9	NF-kappa-B essential modulator	IKBKG	-1.73434	-1.70612	-1.55537	-0.998941	-1.76837	-6.54811	0.34096	-1.58645	-0.132474	-0.376731	1.29839	0.21988	#NAME?	0.114931		2.34581	#NAME?	#NAME?		#NAME?	#NAME?
Q9NWT1	p21-activated protein kinase-interacting protein 1	PAK1IP1	2.4983	1.97518	2.39097	1.95675	2.78025	2.20413	3.05858	2.39037	4.36484	4.37003	3.76212	4.30792	#NAME?	0.0581785		1.40805	#NAME?	#NAME?		#NAME?	#NAME?
Q9BZD2	Equilibrative nucleoside transporter 3	SLC29A3	-3.5682	-2.56727	-2.39071	-2.15347	-6.62796	-6.50553	-1.54074	-1.76752	-1.27674	-1.24227	-1.35941	-2.06524	#NAME?	0.000908467		2.42687	#NAME?	#NAME?		#NAME?	#NAME?
Q5GLZ8	Probable E3 ubiquitin-protein ligase HERC4	HERC4	-0.762179	-2.41143	-2.79919	-2.76278	-2.34228	-2.83315	-1.95098	-0.00575323	0.248674	0.476923	-1.07515	-1.41455	#NAME?	0.626692		1.69836	#NAME?	#NAME?		#NAME?	#NAME?
O00483	Cytochrome c oxidase subunit NDUFA4	NDUFA4	2.47966	1.19153	0.822153	0.920258	-0.0756361	1.60032	3.05508	2.69246	2.39442	2.34986	2.93736	2.12346	#NAME?	0.0847878		1.43573	#NAME?	#NAME?		#NAME?	#NAME?
Q9UKZ1	CCR4-NOT transcription complex subunit 11	CNOT11	-0.506252	-0.0682443	-0.193901	0.0754064	0.0179748	0.0324088	1.03878	0.261121	0.692822	0.764936	1.21227	1.18628	#NAME?	0.286247		0.966469	#NAME?	#NAME?		#NAME?	#NAME?
P00492	Hypoxanthine-guanine phosphoribosyltransferase	HPRT1	0.0931145	-0.712133	0.188332	0.0415174	0.540493	-1.67664	3.45967	0.329064	2.9713	0.143393	3.66573	0.10835	#NAME?	0.114483		2.0338	#NAME?	#NAME?		#NAME?	#NAME?
Q99595	Mitochondrial import inner membrane translocase subunit Tim17-A	TIMM17A	-2.87471	-1.91088	-2.41855	-3.58701	-3.39998	-0.973531	1.57407	-0.172703	-0.276418	-1.03534	-0.769063	-2.63786	#NAME?	0.48192		1.97456	#NAME?	#NAME?		#NAME?	#NAME?
Q9BRZ2	E3 ubiquitin-protein ligase TRIM56	TRIM56	-2.21946	-3.73982	-1.9076	-3.41993	-1.63835	-2.37706	-0.239972	-1.75989	-1.92553	-0.881267	0.309177	-0.942052	#NAME?	0.968301		1.64378	#NAME?	#NAME?		#NAME?	#NAME?
Q9UNX4	WD repeat-containing protein 3	WDR3	-0.819026	-0.819825	-0.8119	-0.701001	-1.18165	-1.34065	-0.179487	-0.658396	2.02142	2.29614	0.209528	3.38779	#NAME?	0.000956988		2.12518	#NAME?	#NAME?		#NAME?	#NAME?
Q9Y6I3	Epsin-1	EPN1	-2.49091	-1.5072	-2.60058	-1.45083	-1.69783	-1.63128	-0.358973	-1.62032	0.116167	-0.127545	-0.0916408	-0.132419	#NAME?	0.656045		1.52732	#NAME?	#NAME?		#NAME?	#NAME?
Q9GZN1	Actin-related protein 6	ACTR6	-4.45737	-6.31657	-1.91277	-6.46453	-6.49762	-6.52153	-1.03001	-0.932799	-6.30275	-0.170074	-7.05666	-0.130113	#NAME?	0.266303		2.758	#NAME?	#NAME?		#NAME?	#NAME?
Q9BST9	Rhotekin	RTKN	-1.44575	-3.20085	-1.69876	-2.61081	-3.69477	-4.05702	-2.88428	-1.92462	1.0893	1.1222	-1.86494	1.34767	#NAME?	0.224309		2.26555	#NAME?	#NAME?		#NAME?	#NAME?
Q9NXS2	Glutaminyl-peptide cyclotransferase-like protein	QPCTL	1.09744	-0.706947	-1.87532	-0.829173	0.285555	-0.0265645	0.201142	1.30049	1.97365	1.95861	0.735852	1.88892	#NAME?	0.49018		1.68561	#NAME?	#NAME?		#NAME?	#NAME?
P51688	N-sulphoglucosamine sulphohydrolase	SGSH	2.66711	1.56407	1.61974	1.50113	1.85159	1.61497	3.25704	3.13544	3.47438	3.60663	3.65786	2.03442	#NAME?	0.505277		1.39119	#NAME?	#NAME?		#NAME?	#NAME?
Q86UL3	Glycerol-3-phosphate acyltransferase 4	GPAT4	-3.37541	-3.21378	-4.03719	-3.99504	-2.67921	-3.59275	-2.91115	-2.82979	-2.19401	-1.72822	-1.48316	-1.97859	#NAME?	0.789088		1.29474	#NAME?	#NAME?		#NAME?	#NAME?
Q86Y38	Xylosyltransferase 1	XYLT1	-1.93607	-2.05155	-2.56473	-1.89627	-1.37974	-4.15765	-1.91592	-0.655222	-1.33929	-0.0723412	0.587279	-0.286688	#NAME?	0.874192		1.7173	#NAME?	#NAME?		#NAME?	#NAME?
Q14728	Major facilitator superfamily domain-containing protein 10	MFSD10	-6.12355	-6.40695	-5.85689	-6.4228	-6.61036	-5.81032	-5.22403	-5.69211	-5.10626	-5.31215	-2.95092	-5.33316	#NAME?	0.0294457		1.2687	#NAME?	#NAME?		#NAME?	#NAME?
Q8N4U5	T-complex protein 11-like protein 2	TCP11L2	-6.06128	-6.40385	-6.5275	-6.47188	-2.8687	-6.60709	-6.42158	-0.684629	-0.981115	-0.708889	-6.99953	-0.865961	#NAME?	0.130907		3.04643	#NAME?	#NAME?		#NAME?	#NAME?
P18433	Receptor-type tyrosine-protein phosphatase alpha	PTPRA	-2.06588	-3.37672	-2.24891	-2.37525	-6.55924	-3.08741	-1.00889	-1.9334	-0.794728	-1.56077	-0.33614	-1.91899	#NAME?	0.0570032		2.02675	#NAME?	#NAME?		#NAME?	#NAME?
D6RBQ6	Ubiquitin carboxyl-terminal hydrolase 17-like protein 17	USP17L17	6.24199	5.68241	5.55789	5.80186	6.35905	5.97251	6.99633	6.27058	7.3166	7.11129	7.95903	6.94607	#NAME?	0.250496		1.16403	#NAME?	#NAME?		#NAME?	#NAME?
O60513	Beta-1,4-galactosyltransferase 4	B4GALT4	-6.06084	-6.38951	-2.36716	-6.24019	-6.62196	-6.4002	-2.888	-2.39699	-6.31129	-2.00095	-4.09314	-2.5089	#NAME?	0.975858		2.31343	#NAME?	#NAME?		#NAME?	#NAME?
P49790	Nuclear pore complex protein Nup153	NUP153	-1.56196	-1.63325	-2.516	-0.159794	-2.18717	1.79714	4.93375	-0.827785	-0.674329	-1.09242	6.00457	3.13432	#NAME?	0.160878		2.95653	#NAME?	#NAME?		#NAME?	#NAME?
P25205	DNA replication licensing factor MCM3	MCM3	0.977714	0.898609	1.41857	0.679901	1.19559	1.06085	0.53233	4.43539	5.09884	5.63295	0.396757	5.9947	#NAME?	0.00010253		2.64329	#NAME?	#NAME?		#NAME?	#NAME?
Q9Y508	E3 ubiquitin-protein ligase RNF114	RNF114	0.308733	0.362926	0.253182	-0.268942	-0.686034	0.0477748	0.552656	0.799746	1.33757	1.33205	1.13055	1.12676	#NAME?	0.563709		1.04361	#NAME?	#NAME?		#NAME?	#NAME?
P57081	tRNA (guanine-N(7)-)-methyltransferase non-catalytic subunit WDR4	WDR4	0.380416	-0.133135	-0.730382	-0.261235	-0.25781	-0.890198	3.84607	1.57711	1.32039	0.861412	2.25825	-0.235642	#NAME?	0.0291274		1.91999	#NAME?	#NAME?		#NAME?	#NAME?
P42224	Signal transducer and activator of transcription 1-alpha/beta	STAT1	0.0476769	-1.02015	-0.959459	-1.17716	1.14184	-0.813035	0.953934	0.709859	0.66518	0.96593	0.900281	1.66196	#NAME?	0.0657718		1.43957	#NAME?	#NAME?		#NAME?	#NAME?
Q9Y283	Inversin	INVS	-6.18802	-6.24071	-6.38942	-6.34064	-6.4107	-3.2823	-6.41531	-2.07963	-2.82915	-3.5018	-3.0107	-2.69581	#NAME?	0.649443		2.38656	#NAME?	#NAME?		#NAME?	#NAME?
P28340	DNA polymerase delta catalytic subunit	POLD1	-0.848281	-1.92774	-2.97812	-3.38497	-4.76319	-3.98726	0.256405	0.388801	-1.13422	-0.368935	-1.37723	-3.1543	#NAME?	0.876109		2.08335	#NAME?	#NAME?		#NAME?	#NAME?
P54252	Ataxin-3	ATXN3	1.33253	-6.30264	-6.43092	-6.22047	-3.53458	-6.37338	-4.00573	-0.507218	0.183159	-1.63266	-4.30699	0.92317	#NAME?	0.456389		3.03053	#NAME?	#NAME?		#NAME?	#NAME?
Q6NXS1	Protein phosphatase inhibitor 2 family member B	PPP1R2B	-2.3299	-2.68269	-1.94341	-2.7255	-2.76825	-2.64024	0.806427	-1.46201	-1.01986	-1.16561	0.0138587	-2.16315	#NAME?	0.0193358		1.68327	#NAME?	#NAME?		#NAME?	#NAME?
Q9H8M9	Protein eva-1 homolog A	EVA1A	-0.0344683	-1.18379	-1.09981	-6.38129	-0.599519	-4.11421	2.49247	-1.401	-0.684401	-0.695097	2.75934	0.13662	#NAME?	0.47775		2.67017	#NAME?	#NAME?		#NAME?	#NAME?
Q8IUC4	Rhophilin-2	RHPN2	-4.89638	-2.68774	-3.18792	-3.24941	-4.78442	-5.36913	-2.71767	-3.51592	-1.91613	-2.02531	-2.54921	-0.968358	#NAME?	0.582783		1.74707	#NAME?	#NAME?		#NAME?	#NAME?
P28799	Progranulin	GRN	-1.0492	-3.34019	-4.08527	-3.05438	-6.46012	-6.63714	-3.17285	-1.91875	-0.259273	-0.292231	-3.72605	-0.450964	#NAME?	0.488213		2.4677	#NAME?	#NAME?		#NAME?	#NAME?
Q8NCG7	Sn1-specific diacylglycerol lipase beta	DAGLB	-4.04517	-6.43367	-4.08034	-3.57126	-2.7459	-5.73317	-2.6151	-3.23703	-3.39622	-1.67621	-2.02483	-2.68489	#NAME?	0.136304		1.82921	#NAME?	#NAME?		#NAME?	#NAME?
O00159	Unconventional myosin-Ic	MYO1C	3.34956	2.54538	2.33412	2.36276	2.56778	3.10409	3.27232	3.55103	3.91346	3.88039	4.1012	3.72072	#NAME?	0.462574		1.02924	#NAME?	#NAME?		#NAME?	#NAME?
O95807	Transmembrane protein 50A	TMEM50A	-1.61937	-6.41788	-6.30419	-6.35477	-6.6042	-6.6598	-6.33569	-2.32234	-2.8465	-3.16426	-3.20063	-1.97768	#NAME?	0.609366		2.35218	#NAME?	#NAME?		#NAME?	#NAME?
Q147X3	N-alpha-acetyltransferase 30	NAA30	-4.04673	-3.52646	-4.70405	-6.33953	-6.51658	-6.43026	-4.5407	-3.00541	-3.2076	-2.93928	-3.06013	-4.02728	#NAME?	0.150145		1.7972	#NAME?	#NAME?		#NAME?	#NAME?
O75323	Protein NipSnap homolog 2	NIPSNAP2	-0.214587	0.0304782	-0.450171	0.0419623	-0.56348	-0.345069	3.0086	-0.0863234	0.321329	0.132874	3.09647	0.715619	#NAME?	0.0014401		1.44824	#NAME?	#NAME?		#NAME?	#NAME?
Q9NUU7	ATP-dependent RNA helicase DDX19A	DDX19A	2.63226	1.50597	1.14537	0.378234	0.708044	0.917845	3.00843	2.18425	2.35703	2.5614	3.04582	2.24715	#NAME?	0.130579		1.35273	#NAME?	#NAME?		#NAME?	#NAME?
Q8N7H5	RNA polymerase II-associated factor 1 homolog	PAF1	-2.60855	-2.21994	-0.934844	-2.69609	-1.17325	-2.73583	1.24558	0.205115	0.294799	0.0637689	1.25755	-2.86829	#NAME?	0.191117		2.0945	#NAME?	#NAME?		#NAME?	#NAME?
Q9Y6X3	MAU2 chromatid cohesion factor homolog	MAU2	-3.6582	-2.55693	-3.95915	-3.7521	-6.56379	-2.36394	-2.64238	-3.37691	-2.70483	-0.0133467	-1.21655	-0.00357187	#NAME?	0.950762		2.14942	#NAME?	#NAME?		#NAME?	#NAME?
Q9UGH3	Solute carrier family 23 member 2	SLC23A2	-3.10678	-3.49375	-4.16341	-4.52484	-4.44587	-2.66551	-1.66718	-2.06887	-2.17195	-2.28864	-3.29917	-2.54719	#NAME?	0.493297		1.39286	#NAME?	#NAME?		#NAME?	#NAME?
Q96EQ0	Small glutamine-rich tetratricopeptide repeat-containing protein beta	SGTB	-1.21887	-2.11611	-3.54245	-2.42801	-6.39071	-3.8593	0.286554	-0.57524	-1.94996	-1.18599	-1.51282	-2.00551	#NAME?	0.140768		2.10208	#NAME?	#NAME?		#NAME?	#NAME?
Q9NTJ5	Phosphatidylinositide phosphatase SAC1	SACM1L	0.632276	0.668249	-0.118118	-0.0607978	0.360307	-0.298554	2.02124	0.340932	2.68796	2.64822	3.94611	0.69225	#NAME?	0.0209373		1.85889	#NAME?	#NAME?		#NAME?	#NAME?
P55265	Double-stranded RNA-specific adenosine deaminase	ADAR	0.937918	0.828224	-0.520316	1.361	-3.52353	1.75194	0.729836	3.5827	3.80093	3.7886	1.21026	1.62224	#NAME?	0.501479		2.31655	#NAME?	#NAME?		#NAME?	#NAME?
Q5VWQ0	Lysine-specific demethylase 9	RSBN1	-5.46394	-4.37258	-3.1705	-4.72385	-2.94392	-4.51085	-3.88794	-4.00148	-0.488121	-0.341233	-3.74156	-0.41136	#NAME?	0.162235		2.05232	#NAME?	#NAME?		#NAME?	#NAME?
O75716	Serine/threonine-protein kinase 16	STK16	-2.28137	-6.23079	-6.40851	-6.35031	-1.91112	-6.45911	-2.68542	-5.93112	-1.98523	-2.0061	-1.39425	-1.97501	#NAME?	0.540622		2.27735	#NAME?	#NAME?		#NAME?	#NAME?
Q3KQV9	UDP-N-acetylhexosamine pyrophosphorylase-like protein 1	UAP1L1	0.701068	-0.183174	0.418602	-0.0500698	-0.653711	0.475149	0.90941	0.548392	1.9416	1.89981	1.64115	1.17083	#NAME?	0.804637		1.23389	#NAME?	#NAME?		#NAME?	#NAME?
Q9BPY3	Protein FAM118B	FAM118B	-1.82387	-2.87967	-1.82495	-3.23645	-6.37824	-6.44079	0.220931	-1.17456	-0.670731	-0.917741	-6.92258	-0.933808	#NAME?	0.675947		2.03091	#NAME?	#NAME?		#NAME?	#NAME?
Q16204	Coiled-coil domain-containing protein 6	CCDC6	-1.15455	-0.847455	-0.727377	-0.476126	-1.18218	-0.130952	0.478567	0.716343	1.09826	0.692507	-0.367717	-0.12555	#NAME?	0.503185		1.16851	#NAME?	#NAME?		#NAME?	#NAME?
Q9Y6D9	Mitotic spindle assembly checkpoint protein MAD1	MAD1L1	0.74043	-0.439918	-0.411546	-0.530874	0.580124	-0.370302	0.286148	0.705483	1.59766	1.42115	1.86025	1.36718	#NAME?	0.94245		1.27833	#NAME?	#NAME?		#NAME?	#NAME?
P25490	Transcriptional repressor protein YY1	YY1	-0.868612	-0.314249	-0.0151598	-0.236897	-1.5697	-0.704318	2.11616	-0.0575762	0.234937	0.428783	3.75816	0.660736	#NAME?	0.0547695		1.80836	#NAME?	#NAME?		#NAME?	#NAME?
Q9BUM1	Glucose-6-phosphatase 3	G6PC3	-1.37655	-1.96046	-0.923292	-1.68552	-1.72551	-1.60749	0.116666	-0.836727	-0.826997	-0.361723	-0.945607	0.0822287	#NAME?	0.540529		1.08444	#NAME?	#NAME?		#NAME?	#NAME?
O60291	E3 ubiquitin-protein ligase MGRN1	MGRN1	-3.7184	-2.86835	-3.04699	-3.73287	-6.39836	-5.58142	-1.92267	-3.62926	-2.54826	-2.6588	-0.215905	-2.57763	#NAME?	0.627593		1.96564	#NAME?	#NAME?		#NAME?	#NAME?
Q9NZC3	Glycerophosphodiester phosphodiesterase 1	GDE1	-1.68511	-3.39267	-2.50331	-2.99751	-2.53665	-3.88307	-0.706737	-1.69765	-1.77216	-2.14386	-0.629691	-1.62752	#NAME?	0.639569		1.40345	#NAME?	#NAME?		#NAME?	#NAME?
P56747	Claudin-6	CLDN6	-0.279357	-0.0635053	-0.540447	-0.584664	-0.346881	-0.253708	0.766248	-0.0917729	0.420093	0.536445	1.12731	1.00123	#NAME?	0.0941023		0.971354	#NAME?	#NAME?		#NAME?	#NAME?
Q9Y4P3	Transducin beta-like protein 2	TBL2	1.13833	1.12428	1.33678	1.3025	1.26154	1.19434	1.35137	3.27596	3.8646	3.71803	1.56357	4.02897	#NAME?	2.23863e-05		1.74079	#NAME?	#NAME?		#NAME?	#NAME?
O95139	NADH dehydrogenase [ubiquinone] 1 beta subcomplex subunit 6	NDUFB6	0.428708	0.228621	0.425433	0.3812	0.108561	0.284684	1.59202	0.726112	1.21717	0.807759	1.25512	1.17327	#NAME?	0.0648173		0.81904	#NAME?	#NAME?		#NAME?	#NAME?
O95758	Polypyrimidine tract-binding protein 3	PTBP3	0.271967	0.35171	0.33364	0.216214	-0.0820096	0.0513402	1.55581	0.392001	1.72358	1.57206	1.39924	1.39647	#NAME?	0.041423		1.14938	#NAME?	#NAME?		#NAME?	#NAME?
Q8NGA1	Olfactory receptor 1M1	OR1M1	0.391004	-0.403222	0.125836	0.105026	0.194896	-0.273212	1.32299	0.554021	0.532665	1.11032	2.01252	1.23295	#NAME?	0.210044		1.10419	#NAME?	#NAME?		#NAME?	#NAME?
Q8NB15	Zinc finger protein 511	ZNF511	-3.87565	-6.45155	-6.27125	-6.45054	-6.54156	-4.05661	-3.40569	-2.8236	-6.36969	-3.68977	-3.7079	-0.0242869	#NAME?	0.328739		2.27104	#NAME?	#NAME?		#NAME?	#NAME?
Q5SRE5	Nucleoporin NUP188 homolog	NUP188	-1.28956	-1.86457	-2.03611	-1.69235	-1.24211	-3.02876	1.03474	-1.49872	-0.699672	-0.908269	1.34303	-0.672277	#NAME?	0.242936		1.62538	#NAME?	#NAME?		#NAME?	#NAME?
Q9NZL4	Hsp70-binding protein 1	HSPBP1	-0.0028026	-2.08237	-1.6648	-1.81255	-1.76999	-2.39125	0.310985	1.00025	1.22899	1.28952	-3.03431	1.26099	#NAME?	0.14629		1.96336	#NAME?	#NAME?		#NAME?	#NAME?
Q99829	Copine-1	CPNE1	4.6983	1.81037	2.00771	1.87756	2.62085	3.5655	3.00558	4.66205	5.16359	5.12653	4.00932	4.741	#NAME?	0.472844		1.68796	#NAME?	#NAME?		#NAME?	#NAME?
P57078	Receptor-interacting serine/threonine-protein kinase 4	RIPK4	-6.11006	-6.40317	-2.90024	-6.45451	-3.64475	-6.57944	-3.82508	-5.9374	0.930216	0.721212	-6.91758	0.845404	#NAME?	0.102906		2.98483	#NAME?	#NAME?		#NAME?	#NAME?
Q5SQH8	Uncharacterized protein C6orf136	C6orf136	-5.33777	-6.3479	-6.28699	-5.19949	-6.4536	-6.46011	-4.91028	-5.01525	-4.26939	-4.7379	-5.51181	-4.64499	#NAME?	0.473294		1.16604	#NAME?	#NAME?		#NAME?	#NAME?
P35318	ADM	ADM	-1.71643	-1.82335	-3.08704	-4.02355	-2.21062	-2.09064	-0.409435	-1.96614	-1.30065	-1.60255	1.00509	-0.719726	#NAME?	0.709517		1.6597	#NAME?	#NAME?		#NAME?	#NAME?
Q9H981	Actin-related protein 8	ACTR8	-2.40235	-5.10135	-6.29907	-6.38386	-6.5879	-6.45921	-6.53411	-2.37377	-3.39712	-3.05605	-1.87694	-2.81726	#NAME?	0.976971		2.19642	#NAME?	#NAME?		#NAME?	#NAME?
Q8TC07	TBC1 domain family member 15	TBC1D15	-1.99531	-2.7391	-3.58669	-3.61725	-2.67083	-2.5064	-2.2134	-1.92547	-0.760194	-0.903059	-2.23276	-1.07589	#NAME?	0.888933		1.33413	#NAME?	#NAME?		#NAME?	#NAME?
Q9NYV4	Cyclin-dependent kinase 12	CDK12	-1.16529	-4.07512	-3.63016	-4.6627	-1.88114	-5.55841	-0.443341	-2.01538	-1.38807	-1.31553	-2.30881	-2.03231	#NAME?	0.0706919		1.91156	#NAME?	#NAME?		#NAME?	#NAME?
P05997	Collagen alpha-2(V) chain	COL5A2	1.11011	0.979751	0.0658461	0.792889	-0.11014	0.420065	0.191666	1.73248	2.06726	2.72645	2.27834	3.48032	#NAME?	0.105675		1.53633	#NAME?	#NAME?		#NAME?	#NAME?
P80297	Metallothionein-1X	MT1X	-3.69854	-4.30091	-2.31795	-2.36879	-6.37327	-1.42652	0.443826	0.321539	0.032031	-0.153261	-1.85203	-6.5221	#NAME?	0.384406		2.126	#NAME?	#NAME?		#NAME?	#NAME?
Q7Z4S6	Kinesin-like protein KIF21A	KIF21A	0.27816	0.112431	0.826233	0.14597	0.446825	-0.768169	2.51933	0.036927	2.18664	2.20398	2.47285	1.98681	#NAME?	0.238459		1.72752	#NAME?	#NAME?		#NAME?	#NAME?
Q13596	Sorting nexin-1	SNX1	0.662751	0.607142	0.420537	0.88202	1.22824	0.753972	5.00704	0.890421	2.99985	3.89492	5.69755	0.0303145	#NAME?	0.000288081		2.32757	#NAME?	#NAME?		#NAME?	#NAME?
P09884	DNA polymerase alpha catalytic subunit	POLA1	-2.14034	-6.38416	-6.27584	-6.24896	-6.55129	-6.54122	-2.6884	-1.98241	-3.18266	-2.52145	-3.7373	-6.62788	#NAME?	0.920891		2.23362	#NAME?	#NAME?		#NAME?	#NAME?
Q9UGN5	Poly [ADP-ribose] polymerase 2	PARP2	-2.94666	-3.04039	-2.62202	-2.25858	-3.1567	-2.69038	-0.93588	-2.75606	-0.929422	-0.920261	-1.12309	-1.51463	#NAME?	0.111378		1.42257	#NAME?	#NAME?		#NAME?	#NAME?
O00165	HCLS1-associated protein X-1	HAX1	-3.06717	-2.33233	-2.55008	-6.43555	-2.61992	-3.93311	1.59329	-2.94739	-2.32387	-3.2903	2.68405	-2.54267	#NAME?	0.287479		2.35188	#NAME?	#NAME?		#NAME?	#NAME?
Q92620	Pre-mRNA-splicing factor ATP-dependent RNA helicase PRP16	DHX38	-0.420614	-1.52594	-0.921291	-0.920406	0.192564	-1.40594	-0.423029	-0.348859	1.65919	1.44519	0.0781668	1.81453	#NAME?	0.304633		1.5378	#NAME?	#NAME?		#NAME?	#NAME?
P35250	Replication factor C subunit 2	RFC2	1.80235	-1.37609	-0.469068	-0.0625289	0.467985	-0.290626	-0.309608	2.1463	3.96237	3.83666	0.576634	1.97145	#NAME?	0.322355		2.01863	#NAME?	#NAME?		#NAME?	#NAME?
Q96JB2	Conserved oligomeric Golgi complex subunit 3	COG3	0.526122	-2.46436	-0.665038	-1.32248	-0.5744	-1.22965	-0.758	1.1668	1.95286	1.89849	-0.78281	1.50964	#NAME?	0.596271		1.78613	#NAME?	#NAME?		#NAME?	#NAME?
P82909	28S ribosomal protein S36, mitochondrial	MRPS36	0.876498	1.0485	1.0379	1.35239	1.1556	0.491061	3.29217	0.870654	2.79274	2.66076	3.24759	1.93202	#NAME?	0.0244054		1.47233	#NAME?	#NAME?		#NAME?	#NAME?
Q9Y3Q3	Transmembrane emp24 domain-containing protein 3	TMED3	-0.643056	-0.734436	-1.23342	-1.58615	-4.78404	-1.5719	0.792527	-0.61608	0.0195247	-0.484514	1.05966	-0.364191	#NAME?	0.11147		1.82666	#NAME?	#NAME?		#NAME?	#NAME?
Q9BZX2	Uridine-cytidine kinase 2	UCK2	1.06712	-2.39141	-1.29924	-2.56341	-2.11574	-2.41136	-1.76801	0.702506	1.50929	1.37515	-1.16403	1.86509	#NAME?	0.850122		2.039	#NAME?	#NAME?		#NAME?	#NAME?
Q8N357	Solute carrier family 35 member F6	SLC35F6	-2.05166	-2.21901	-2.36513	-2.27158	-5.15429	-2.47117	-1.52431	-0.816571	-0.569197	-0.986777	-1.47973	-1.76782	#NAME?	0.062801		1.56474	#NAME?	#NAME?		#NAME?	#NAME?
P12236	ADP/ATP translocase 3	SLC25A6	2.7127	3.29882	2.8202	2.96027	1.87373	3.47063	3.51621	3.86308	3.96987	4.03163	3.81575	4.48834	#NAME?	0.242766		1.09142	#NAME?	#NAME?		#NAME?	#NAME?
Q8IY17	Neuropathy target esterase	PNPLA6	-1.2775	-1.36482	-1.65387	-1.50529	-2.24528	-1.20653	1.90645	-2.49527	0.925691	0.74556	2.9096	-0.544613	#NAME?	0.0030246		2.11678	#NAME?	#NAME?		#NAME?	#NAME?
P08579	U2 small nuclear ribonucleoprotein B''	SNRPB2	3.06304	2.20917	2.22885	2.24581	2.83103	1.84314	4.45158	3.03957	3.38836	3.53517	5.04623	2.945	#NAME?	0.203777		1.33081	#NAME?	#NAME?		#NAME?	#NAME?
P51798	H(+)/Cl(-) exchange transporter 7	CLCN7	-1.13866	-0.987287	-1.48226	-2.22216	-1.7406	-1.96244	1.09512	-0.270797	-0.563681	-0.500681	0.723091	-1.53507	#NAME?	0.155758		1.41356	#NAME?	#NAME?		#NAME?	#NAME?
O14647	Chromodomain-helicase-DNA-binding protein 2	CHD2	-0.0902723	-1.22576	-0.940415	-0.829294	-0.696377	-0.455843	1.86547	-1.34417	1.12025	0.946916	2.46943	1.08884	#NAME?	0.0208041		1.73078	#NAME?	#NAME?		#NAME?	#NAME?
Q13439	Golgin subfamily A member 4	GOLGA4	-1.28957	-0.223436	-3.25374	-1.68368	-1.37285	-3.46979	-0.0318705	-1.12763	-0.540642	-0.197646	-0.403378	0.797498	#NAME?	0.165173		1.63157	#NAME?	#NAME?		#NAME?	#NAME?
P15144	Aminopeptidase N	ANPEP	0.883097	0.520486	-0.441246	0.0509265	0.896994	1.59756	2.21082	0.710767	1.50009	2.05526	2.6069	2.77463	#NAME?	0.885453		1.39177	#NAME?	#NAME?		#NAME?	#NAME?
Q14534	Squalene monooxygenase	SQLE	0.973576	1.95517	1.86291	1.94292	1.45743	1.18775	3.18914	1.35665	2.88037	3.1141	4.3601	2.84413	#NAME?	0.0940456		1.39412	#NAME?	#NAME?		#NAME?	#NAME?
Q9Y2A7	Nck-associated protein 1	NCKAP1	1.71637	0.355033	0.429516	0.340659	2.02068	0.886432	3.16299	1.71794	2.01125	1.82383	3.98268	1.94607	#NAME?	0.643277		1.48268	#NAME?	#NAME?		#NAME?	#NAME?
Q5T653	39S ribosomal protein L2, mitochondrial	MRPL2	2.89908	-0.19572	0.32654	-0.370238	-0.552833	-0.657406	0.477743	2.52876	3.41544	3.27402	0.0198321	4.07465	#NAME?	0.650444		2.05684	#NAME?	#NAME?		#NAME?	#NAME?
Q9UP83	Conserved oligomeric Golgi complex subunit 5	COG5	1.93981	-2.29358	-3.19474	-3.85021	-1.44877	-1.91633	0.899436	2.23468	1.27909	1.79664	-1.40767	-1.73745	#NAME?	0.690843		2.30476	#NAME?	#NAME?		#NAME?	#NAME?
Q8N3P4	Vacuolar protein sorting-associated protein 8 homolog	VPS8	-6.29388	-6.38208	-6.45984	-6.3023	-6.34071	-3.34351	-1.02215	-3.24903	-6.4315	-6.46739	-0.920478	-2.8373	#NAME?	0.150991		2.36574	#NAME?	#NAME?		#NAME?	#NAME?
P53609	Geranylgeranyl transferase type-1 subunit beta	PGGT1B	-2.0719	-6.29827	-6.54612	-6.47243	-6.3981	-6.45205	-1.89391	-2.42014	-2.73615	-2.80526	-2.73332	-6.53597	#NAME?	0.894902		2.51902	#NAME?	#NAME?		#NAME?	#NAME?
Q9H361	Polyadenylate-binding protein 3	PABPC3	-0.00935037	-2.90326	-6.41661	-6.32353	-0.408606	-0.867469	-0.12444	0.0778129	-0.644374	-0.127152	0.187277	-0.698539	#NAME?	0.000329477		2.5999	#NAME?	#NAME?		#NAME?	#NAME?
P24390	ER lumen protein-retaining receptor 1	KDELR1	0.456639	0.449714	-0.905133	-0.633533	0.109079	0.549261	0.591965	0.640728	1.34493	1.17455	1.59575	2.50296	#NAME?	0.793602		1.30414	#NAME?	#NAME?		#NAME?	#NAME?
Q14241	Elongin-A	ELOA	-0.831179	-1.03457	-1.56441	-1.14373	-2.2414	-2.06666	-0.260592	-1.15765	0.240348	-0.488627	0.607589	-0.448971	#NAME?	0.889174		1.22901	#NAME?	#NAME?		#NAME?	#NAME?
O95749	Geranylgeranyl pyrophosphate synthase	GGPS1	-1.25226	-1.14521	-2.26394	-1.36455	-1.50469	-1.66957	3.26875	-1.08276	-1.62966	-1.47851	4.5678	-0.848192	#NAME?	0.000716928		1.99961	#NAME?	#NAME?		#NAME?	#NAME?
Q96DP5	Methionyl-tRNA formyltransferase, mitochondrial	MTFMT	-3.76947	-4.23759	-4.0956	-4.37966	-4.6762	-4.33152	-3.50331	-2.69047	-2.6173	-2.79302	-3.65159	-3.8969	#NAME?	0.209456		1.05624	#NAME?	#NAME?		#NAME?	#NAME?
Q9H936	Mitochondrial glutamate carrier 1	SLC25A22	0.59641	0.00893306	0.413016	0.354441	-1.11222	0.411137	1.42414	0.88928	1.11135	1.18614	2.22861	0.976372	#NAME?	0.594759		1.19069	#NAME?	#NAME?		#NAME?	#NAME?
Q99643	Succinate dehydrogenase cytochrome b560 subunit, mitochondrial	SDHC	1.54013	0.468896	-0.187001	0.0344091	-2.92699	-0.441366	1.15827	1.60207	0.966667	1.73581	2.21657	1.69799	#NAME?	0.0196655		1.81489	#NAME?	#NAME?		#NAME?	#NAME?
Q66K14	TBC1 domain family member 9B	TBC1D9B	-1.11611	-0.926738	-2.98536	-2.45081	-4.45143	-3.27941	-0.843635	-1.36269	-0.862806	-0.74044	-0.199943	-0.84692	#NAME?	0.0133733		1.72557	#NAME?	#NAME?		#NAME?	#NAME?
O14893	Gem-associated protein 2	GEMIN2	-1.77853	-6.32946	-6.39326	-6.50427	-1.31634	-2.55665	-3.03783	-1.4026	-2.9713	-0.429903	-1.73131	-1.42885	#NAME?	0.0665824		2.31279	#NAME?	#NAME?		#NAME?	#NAME?
P57737	Coronin-7	CORO7	-1.86887	-1.56965	-0.505748	-3.32399	-2.44523	0.893019	-3.1616	3.78649	4.83077	4.15123	-3.67641	4.06225	#NAME?	0.0511145		3.13553	#NAME?	#NAME?		#NAME?	#NAME?
P13987	CD59 glycoprotein	CD59	3.34909	2.6956	2.50371	2.72937	2.32314	2.4023	3.35951	3.33727	3.44407	3.49724	4.56713	4.45544	#NAME?	0.359484		1.10957	#NAME?	#NAME?		#NAME?	#NAME?
P37173	TGF-beta receptor type-2	TGFBR2	-0.0410047	-3.27571	0.300149	-1.00989	-1.27443	0.727782	0.654288	0.150709	0.775913	0.850941	2.23873	1.1201	#NAME?	0.136407		1.7273	#NAME?	#NAME?		#NAME?	#NAME?
P49792	E3 SUMO-protein ligase RanBP2	RANBP2	5.11141	3.91273	3.93652	3.91585	-1.54376	3.26346	4.60885	4.17416	4.57109	4.35181	5.80413	4.65165	#NAME?	0.00761487		1.59425	#NAME?	#NAME?		#NAME?	#NAME?
P04181	Ornithine aminotransferase, mitochondrial	OAT	3.87947	3.9865	4.12211	4.00065	3.66559	4.28891	4.53929	4.34306	4.81505	4.86691	4.99109	4.8792	#NAME?	0.75237		0.748564	#NAME?	#NAME?		#NAME?	#NAME?
P78371	T-complex protein 1 subunit beta	CCT2	3.76346	3.88261	3.85228	3.81127	4.0877	3.48129	5.50542	3.58708	5.16092	5.17948	5.58575	6.15104	#NAME?	0.00554867		1.38185	#NAME?	#NAME?		#NAME?	#NAME?
O96011	Peroxisomal membrane protein 11B	PEX11B	0.344105	-0.27501	0.503455	-0.134397	-0.400829	-0.885454	1.13161	0.393164	4.19558	3.68666	1.15301	0.209803	#NAME?	0.0184681		1.93633	#NAME?	#NAME?		#NAME?	#NAME?
Q13409	Cytoplasmic dynein 1 intermediate chain 2	DYNC1I2	1.10733	-0.0649894	0.570115	0.184172	0.387797	-0.329779	0.835078	1.32167	3.24467	2.97119	0.985472	1.19254	#NAME?	0.128436		1.44933	#NAME?	#NAME?		#NAME?	#NAME?
P08243	Asparagine synthetase [glutamine-hydrolyzing]	ASNS	-0.516675	-1.82707	-0.454104	-0.569441	-0.0228695	-0.494627	-0.302082	0.916627	0.752209	0.710516	0.208401	0.737742	#NAME?	0.554214		1.15137	#NAME?	#NAME?		#NAME?	#NAME?
Q8WUD1	Ras-related protein Rab-2B	RAB2B	-0.897315	-0.607497	-2.22672	-0.602797	-0.495554	-1.93389	-0.447734	-0.955167	0.601611	0.456385	0.996921	0.926908	#NAME?	0.92511		1.39045	#NAME?	#NAME?		#NAME?	#NAME?
Q96QU8	Exportin-6	XPO6	-5.5096	-6.12667	-6.81833	-6.50306	-6.4352	-6.48339	-5.32873	-5.5178	-4.22736	-5.36298	-5.18384	-5.73318	#NAME?	0.750145		1.08706	#NAME?	#NAME?		#NAME?	#NAME?
Q86UP2	Kinectin	KTN1	2.90236	2.46978	2.1654	2.20233	2.53824	2.07995	3.44836	2.78309	3.52973	3.71106	3.71079	3.71581	#NAME?	0.733416		1.09013	#NAME?	#NAME?		#NAME?	#NAME?
P20648	Potassium-transporting ATPase alpha chain 1	ATP4A	1.66982	0.152783	1.08973	0.344222	-6.43066	0.160294	1.64548	1.83078	2.51091	1.85913	2.11303	2.42637	#NAME?	0.0002296		2.56659	#NAME?	#NAME?		#NAME?	#NAME?
Q8IXW0	Lamin tail domain-containing protein 2	LMNTD2	-2.38143	-2.42659	-3.23016	-6.49324	-3.50638	-6.54343	-5.05325	-1.44789	-1.4487	-1.32805	-1.80205	-3.13574	#NAME?	0.572904		1.72759	#NAME?	#NAME?		#NAME?	#NAME?
O15120	1-acyl-sn-glycerol-3-phosphate acyltransferase beta	AGPAT2	-0.32823	-1.50071	-1.16833	-1.68729	-0.576902	-1.44175	-0.661578	-0.104588	0.268539	0.397454	-0.435373	0.483137	#NAME?	0.745771		1.10847	#NAME?	#NAME?		#NAME?	#NAME?
Q8N8S7	Protein enabled homolog	ENAH	-2.87631	-3.81573	-2.50457	-6.43377	-6.57125	-6.36348	-2.31331	-1.90349	-2.54471	-2.83982	-3.5824	-3.20476	#NAME?	0.0255832		2.02944	#NAME?	#NAME?		#NAME?	#NAME?
Q8TE67	Epidermal growth factor receptor kinase substrate 8-like protein 3	EPS8L3	-1.13521	-1.37732	-2.09285	-1.6275	-1.24664	-1.28926	-1.72169	-0.335565	0.497745	0.612241	-0.224349	1.22105	#NAME?	0.0346296		1.4697	#NAME?	#NAME?		#NAME?	#NAME?
Q00169	Phosphatidylinositol transfer protein alpha isoform	PITPNA	-5.97421	-3.82238	-4.24327	-5.47757	-6.53584	-6.61747	3.80386	-2.72107	-6.25426	-4.49067	2.4376	-6.46441	#NAME?	0.0113924		3.16363	#NAME?	#NAME?		#NAME?	#NAME?
Q9H2C0	Gigaxonin	GAN	-6.13623	-6.38933	-6.27381	-6.3939	-6.39933	-4.59328	-2.10468	-3.69128	-6.26686	-3.40278	-2.75033	-6.53623	#NAME?	0.0563196		1.90562	#NAME?	#NAME?		#NAME?	#NAME?
Q9NUT2	ATP-binding cassette sub-family B member 8, mitochondrial	ABCB8	-1.96282	-1.75846	-2.69329	-1.51167	-0.828116	-3.08021	0.0993043	-1.76584	-0.81063	-0.600616	0.810908	-0.883983	#NAME?	0.856218		1.44728	#NAME?	#NAME?		#NAME?	#NAME?
P55061	Bax inhibitor 1	TMBIM6	-0.983268	-2.48285	-1.20294	-1.59182	0.114687	-1.26704	1.80314	-0.181988	0.300236	0.283895	0.96391	-1.33155	#NAME?	0.634379		1.54181	#NAME?	#NAME?		#NAME?	#NAME?
Q5T0N5	Formin-binding protein 1-like	FNBP1L	-3.81333	-6.38445	-5.84223	-3.88248	-5.05682	-3.93372	0.592912	-3.25367	-5.89584	-3.48287	0.878587	-3.69374	#NAME?	0.0790937		2.34307	#NAME?	#NAME?		#NAME?	#NAME?
P20827	Ephrin-A1	EFNA1	-0.652079	-1.43723	-1.24731	-2.19379	-0.252744	-1.30567	2.48436	-1.02838	-0.523193	-0.899402	3.23727	-0.330555	#NAME?	0.0422227		1.67149	#NAME?	#NAME?		#NAME?	#NAME?
Q6P4A7	Sideroflexin-4	SFXN4	-0.462728	-0.0845566	-0.6982	-0.530594	-0.465566	-0.539301	0.959081	-0.509816	0.168839	1.68849	1.56051	1.58776	#NAME?	0.00547071		1.37264	#NAME?	#NAME?		#NAME?	#NAME?
Q00341	Vigilin	HDLBP	1.45099	1.22885	0.318321	0.72877	1.50648	1.08449	5.8641	1.30046	1.38191	1.37084	6.06154	1.45459	#NAME?	0.00252605		1.85259	#NAME?	#NAME?		#NAME?	#NAME?
Q08431	Lactadherin	MFGE8	-5.10056	-3.58233	-4.00705	-4.42482	-4.07412	-6.52046	-4.25483	-3.46779	-3.17593	-2.75636	-2.85963	-2.45435	#NAME?	0.290459		1.45674	#NAME?	#NAME?		#NAME?	#NAME?
P29317	Ephrin type-A receptor 2	EPHA2	1.96796	2.21011	1.77658	1.97163	2.00538	2.09098	2.04344	2.83483	3.18071	3.56202	3.87962	4.19055	#NAME?	0.00214961		1.27809	#NAME?	#NAME?		#NAME?	#NAME?
Q9NRG9	Aladin	AAAS	-0.880908	-0.643509	-0.739475	-0.998907	0.204969	-0.409015	1.56973	0.0623831	0.224466	0.191327	1.93468	-0.0182666	#NAME?	0.160806		1.23853	#NAME?	#NAME?		#NAME?	#NAME?
Q9BY67	Cell adhesion molecule 1	CADM1	-0.306248	-1.81639	-0.932724	-2.54308	-2.30017	-3.33018	-0.569956	-1.17171	1.2851	-0.212385	0.753304	-1.48849	#NAME?	0.964758		1.63744	#NAME?	#NAME?		#NAME?	#NAME?
O76054	SEC14-like protein 2	SEC14L2	-5.23699	-3.31021	-6.53613	-6.41537	-6.43751	-6.44416	-3.45541	-4.37103	-1.1592	-0.703015	-5.1951	-6.44258	#NAME?	0.238821		2.17567	#NAME?	#NAME?		#NAME?	#NAME?
Q9NQW6	Anillin	ANLN	-2.33574	-5.52081	-6.34008	-5.6408	-5.36591	-5.61642	-4.04281	-3.68788	-3.19548	-3.40078	-2.85784	-3.4828	#NAME?	0.0161773		1.69203	#NAME?	#NAME?		#NAME?	#NAME?
Q01167	Forkhead box protein K2	FOXK2	-0.742465	-3.03178	-1.63563	-1.31305	-1.14447	-1.90578	0.819825	-1.23788	-0.644235	-0.406745	0.869593	-0.752262	#NAME?	0.845311		1.40358	#NAME?	#NAME?		#NAME?	#NAME?
P06280	Alpha-galactosidase A	GLA	-2.14346	-4.20302	-3.05535	-3.02182	-5.62766	-2.84109	-1.93368	-1.67609	-1.51459	-2.91885	-1.77802	-2.0643	#NAME?	0.0662989		1.50114	#NAME?	#NAME?		#NAME?	#NAME?
O14545	TRAF-type zinc finger domain-containing protein 1	TRAFD1	-5.54739	-5.93605	-6.3046	-5.99057	-6.57938	-6.4939	-3.34336	-2.13029	-3.68668	-4.45316	-5.97865	-6.3824	#NAME?	0.00712555		1.81289	#NAME?	#NAME?		#NAME?	#NAME?
O95707	Ribonuclease P protein subunit p29	POP4	-1.85179	-3.69317	-2.72442	-1.94944	-2.26333	-3.50967	-0.68193	-2.02524	-2.04618	-1.76538	-0.907232	-0.837106	#NAME?	0.645472		1.28813	#NAME?	#NAME?		#NAME?	#NAME?
P21333	Filamin-A	FLNA	4.50936	1.62522	1.63785	2.00209	4.10812	3.82263	3.7198	4.76409	4.57618	4.7131	3.94308	4.75694	#NAME?	0.0355535		1.46132	#NAME?	#NAME?		#NAME?	#NAME?
Q04941	Proteolipid protein 2	PLP2	-1.8503	-3.10474	-6.25548	-3.18446	-6.53532	-3.27231	-1.00612	-6.09151	-3.10768	-1.72155	-1.06692	-1.51671	#NAME?	0.956174		1.61535	#NAME?	#NAME?		#NAME?	#NAME?
Q9BT25	HAUS augmin-like complex subunit 8	HAUS8	-6.21645	-6.28312	-6.45836	-6.43639	-6.4981	-6.37754	-2.12091	-2.70056	-3.61755	-4.36477	-7.05067	-6.38693	#NAME?	5.38764e-06		2.00477	#NAME?	#NAME?		#NAME?	#NAME?
Q6UWP7	Lysocardiolipin acyltransferase 1	LCLAT1	-2.45139	-2.12996	2.05145	-2.90179	-2.36528	-3.02115	5.33297	-2.55136	-2.44806	-1.59265	5.50146	-1.71049	#NAME?	0.146934		2.225	#NAME?	#NAME?		#NAME?	#NAME?
Q9C0C9	(E3-independent) E2 ubiquitin-conjugating enzyme	UBE2O	2.86157	-0.699438	-1.28052	-0.689602	0.391197	-1.46244	1.73192	2.26903	1.77439	1.68321	1.17988	1.24876	#NAME?	0.00804332		1.7944	#NAME?	#NAME?		#NAME?	#NAME?
P08581	Hepatocyte growth factor receptor	MET	-4.64461	-5.0882	-3.58163	-6.27387	-3.66389	-3.75992	-1.63986	-4.39946	-3.33562	-2.4753	-3.52088	-2.27237	#NAME?	0.899455		1.56144	#NAME?	#NAME?		#NAME?	#NAME?
Q05397	Focal adhesion kinase 1	PTK2	-1.45135	-0.161401	-1.51643	-1.19752	-0.107966	-2.55725	5.50631	-1.13443	1.02217	1.31024	3.19257	-2.3326	#NAME?	0.0275063		2.42603	#NAME?	#NAME?		#NAME?	#NAME?
Q9NVH6	Trimethyllysine dioxygenase, mitochondrial	TMLHE	-2.23318	-2.87825	0.456774	-2.42417	-2.60637	-0.192942	0.0696921	-0.982457	-0.27062	-0.289882	1.05655	0.28699	#NAME?	0.136978		1.62474	#NAME?	#NAME?		#NAME?	#NAME?
Q9NR46	Endophilin-B2	SH3GLB2	-1.36258	-1.01659	-2.95665	-2.42806	-1.21577	-2.97253	0.111512	-0.420397	-1.04723	-1.10715	0.289714	-1.53386	#NAME?	0.658445		1.37413	#NAME?	#NAME?		#NAME?	#NAME?
Q9UJX2	Cell division cycle protein 23 homolog	CDC23	0.139181	-0.21485	-0.0993915	-0.0452619	0.694149	-0.477961	1.37267	0.0204921	1.00077	0.766417	1.93849	1.57348	#NAME?	0.266974		1.11274	#NAME?	#NAME?		#NAME?	#NAME?
Q12888	TP53-binding protein 1	TP53BP1	-2.10131	-2.46824	-0.00248095	-0.841846	-0.421047	-5.84927	0.806062	-1.29232	0.886149	0.165542	1.19415	-1.14304	#NAME?	0.158682		2.05012	#NAME?	#NAME?		#NAME?	#NAME?
Q96HD1	Cysteine-rich with EGF-like domain protein 1	CRELD1	-2.31895	-3.15711	-2.29635	-2.90526	-5.66586	-2.23115	-1.1518	-1.80542	-1.41486	-1.83311	-0.370461	-2.51215	#NAME?	0.218155		1.58115	#NAME?	#NAME?		#NAME?	#NAME?
Q9H9P8	L-2-hydroxyglutarate dehydrogenase, mitochondrial	L2HGDH	-2.12986	-1.99549	-1.42992	-1.83244	-2.77144	-3.41321	-1.36335	-2.07806	0.587175	0.433481	-0.776123	-1.58552	#NAME?	0.368124		1.46499	#NAME?	#NAME?		#NAME?	#NAME?
Q16186	Proteasomal ubiquitin receptor ADRM1	ADRM1	0.138371	0.517659	0.478914	0.354824	-0.828045	0.631941	1.46701	0.905507	1.42971	1.01886	1.58823	0.822027	#NAME?	0.300136		0.989613	#NAME?	#NAME?		#NAME?	#NAME?
Q9H8Y8	Golgi reassembly-stacking protein 2	GORASP2	2.6278	2.53288	2.61576	2.32772	1.9833	2.22722	5.83257	2.29182	4.38657	4.32429	2.66363	4.41822	#NAME?	0.00269668		1.6004	#NAME?	#NAME?		#NAME?	#NAME?
Q09472	Histone acetyltransferase p300	EP300	-1.5321	-1.42374	-3.79945	-1.88161	-1.26344	-1.3605	-0.642281	-2.28448	0.366833	0.488288	-0.370827	0.404849	#NAME?	0.843686		1.5372	#NAME?	#NAME?		#NAME?	#NAME?
Q9BY44	Eukaryotic translation initiation factor 2A	EIF2A	2.84895	0.48794	0.456426	-0.0209	1.09803	-0.448576	4.76234	0.693534	1.13634	1.33494	4.97962	0.918387	#NAME?	0.255568		1.56721	#NAME?	#NAME?		#NAME?	#NAME?
Q13795	ADP-ribosylation factor-related protein 1	ARFRP1	-0.462924	-1.16532	-0.825399	-1.09408	-0.433924	-1.29639	-0.905802	-0.0897573	0.108604	0.519125	0.935849	0.659762	#NAME?	0.226715		1.0843	#NAME?	#NAME?		#NAME?	#NAME?
O75691	Small subunit processome component 20 homolog	UTP20	-0.453919	-1.9934	1.10825	-1.15623	-2.19605	1.14382	0.319492	-0.436347	2.13952	2.04454	1.19351	1.59326	#NAME?	0.440837		1.73358	#NAME?	#NAME?		#NAME?	#NAME?
Q9H5V9	UPF0428 protein CXorf56	CXorf56	-1.93648	-2.42712	-6.47033	-2.94026	-6.4983	-6.45668	-1.83259	-2.08904	-1.35006	-0.884983	-2.40403	-6.57433	#NAME?	0.859149		1.93236	#NAME?	#NAME?		#NAME?	#NAME?
Q99569	Plakophilin-4	PKP4	0.00578284	0.324501	-2.03458	-3.59944	0.776311	-2.94178	0.323712	0.216878	0.626837	1.33551	0.468327	1.0006	#NAME?	0.0059977		1.90684	#NAME?	#NAME?		#NAME?	#NAME?
Q2M296	Methenyltetrahydrofolate synthase domain-containing protein	MTHFSD	-6.27815	-6.2659	-6.554	-6.49879	-6.44213	-4.20012	-3.40462	-5.97211	-6.4314	-2.90376	-4.04652	-3.17864	#NAME?	0.288998		1.71701	#NAME?	#NAME?		#NAME?	#NAME?
Q2M3G0	ATP-binding cassette sub-family B member 5	ABCB5	1.00618	-0.631874	-0.61283	-1.99199	1.69518	-0.651073	1.60789	1.2333	0.735538	1.24027	2.22852	1.38178	#NAME?	0.0492269		1.60228	#NAME?	#NAME?		#NAME?	#NAME?
P02795	Metallothionein-2	MT2A	2.63735	1.96143	2.73798	2.54391	-6.3401	2.61316	4.5012	4.36591	4.44376	3.93206	1.95229	1.50928	#NAME?	0.050113		2.42513	#NAME?	#NAME?		#NAME?	#NAME?
Q9UL54	Serine/threonine-protein kinase TAO2	TAOK2	-6.09276	-6.16803	-6.28656	-6.32686	-6.54829	-6.44824	-3.00361	-6.10946	-4.75136	-4.10099	-2.5832	-6.63862	#NAME?	0.000127795		1.78058	#NAME?	#NAME?		#NAME?	#NAME?
O95210	Starch-binding domain-containing protein 1	STBD1	0.711732	-0.5155	-0.58573	-0.822493	-0.68915	-1.57892	2.16164	0.359282	0.441302	0.759008	0.0145887	0.400337	#NAME?	0.957608		1.26937	#NAME?	#NAME?		#NAME?	#NAME?
P48651	Phosphatidylserine synthase 1	PTDSS1	-0.117716	-0.803056	-0.857558	-0.503943	-0.327489	-0.963173	3.38828	-0.337406	-0.187777	0.572838	5.95707	0.389324	#NAME?	0.000416682		2.22588	#NAME?	#NAME?		#NAME?	#NAME?
Q8N4Z0	Ras-related protein Rab-42	RAB42	-0.0425858	-1.41698	-3.60686	-3.95115	-4.00671	-3.20495	0.00958614	-0.699977	-0.516338	-3.32298	-0.52431	-0.92595	#NAME?	0.50757		1.70821	#NAME?	#NAME?		#NAME?	#NAME?
Q92520	Protein FAM3C	FAM3C	0.355455	0.0803822	-0.809866	0.204693	-0.728318	-0.199018	1.24438	0.167675	1.00629	0.560245	2.4486	0.694992	#NAME?	0.3155		1.20314	#NAME?	#NAME?		#NAME?	#NAME?
Q13151	Heterogeneous nuclear ribonucleoprotein A0	HNRNPA0	4.63528	2.77487	2.64129	2.82505	3.14083	2.89248	3.4925	4.56603	4.90847	5.00612	3.49862	5.21524	#NAME?	0.951662		1.2962	#NAME?	#NAME?		#NAME?	#NAME?
Q6PKG0	La-related protein 1	LARP1	4.37931	3.73115	2.97016	3.63053	3.95945	2.24661	4.61392	4.49545	4.39743	4.83997	5.0786	4.22685	#NAME?	0.0694009		1.1225	#NAME?	#NAME?		#NAME?	#NAME?
O95155	Ubiquitin conjugation factor E4 B	UBE4B	-0.0849788	-1.59762	-1.48391	-2.0861	-2.8384	-2.20739	-1.37414	0.324846	-0.311195	0.13229	-1.44339	1.84009	#NAME?	0.570731		1.57782	#NAME?	#NAME?		#NAME?	#NAME?
Q9Y2R4	Probable ATP-dependent RNA helicase DDX52	DDX52	0.579323	0.422983	0.632215	0.187587	0.43339	0.589645	0.949287	0.699514	1.33096	1.24521	1.47032	1.47272	#NAME?	0.192184		0.720477	#NAME?	#NAME?		#NAME?	#NAME?
Q9H479	Fructosamine-3-kinase	FN3K	0.755037	0.996097	0.903574	1.14827	1.70642	0.638561	3.51002	0.884269	3.34223	3.29014	2.66383	1.24429	#NAME?	0.0296391		1.46447	#NAME?	#NAME?		#NAME?	#NAME?
Q5BJH7	Protein YIF1B	YIF1B	-0.107277	-0.524979	-0.477415	-0.369374	-0.257259	-1.06259	1.30864	-0.0691817	0.112417	0.575458	1.42785	0.114348	#NAME?	0.162059		1.04474	#NAME?	#NAME?		#NAME?	#NAME?
O60551	Glycylpeptide N-tetradecanoyltransferase 2	NMT2	-2.10645	-2.57518	-2.96132	-2.83719	-2.70432	-2.23789	-1.08937	-1.86471	-1.81453	-1.94969	-1.47097	-2.09108	#NAME?	0.848193		0.857	#NAME?	#NAME?		#NAME?	#NAME?
Q14527	Helicase-like transcription factor	HLTF	-2.841	-6.30858	-6.39994	-6.2095	-6.55067	-6.58607	-2.02158	-3.96166	-5.17505	-3.35547	-7.004	-0.429365	#NAME?	0.337783		2.15811	#NAME?	#NAME?		#NAME?	#NAME?
Q7KZN9	Cytochrome c oxidase assembly protein COX15 homolog	COX15	-0.838769	-0.791195	-0.622301	-1.18935	-0.502687	-0.980681	0.382153	-0.0270406	0.424184	0.365842	-0.277755	-0.65135	#NAME?	0.233964		0.856837	#NAME?	#NAME?		#NAME?	#NAME?
P00395	Cytochrome c oxidase subunit 1	MT-CO1	0.716988	1.65779	0.588902	1.27205	0.523167	0.847545	1.93356	0.966683	2.20195	1.8222	2.69826	2.24296	#NAME?	0.565564		1.0432	#NAME?	#NAME?		#NAME?	#NAME?
P0DN79	Cystathionine beta-synthase-like protein	CBSL	-1.26602	-1.37037	-0.0817928	-2.14987	-0.86741	-0.83175	-0.403202	-0.71997	0.164781	0.263597	0.137313	1.28438	#NAME?	0.997299		1.21569	#NAME?	#NAME?		#NAME?	#NAME?
Q9UBT2	SUMO-activating enzyme subunit 2	UBA2	3.0619	1.96392	1.80143	1.82716	2.43417	2.00748	3.02303	2.80033	2.98473	2.98542	3.22985	3.32048	#NAME?	0.0568089		0.87463	#NAME?	#NAME?		#NAME?	#NAME?
P30154	Serine/threonine-protein phosphatase 2A 65 kDa regulatory subunit A beta isoform	PPP2R1B	-1.68278	-4.25087	-3.61407	-3.27729	-1.78062	-4.76663	-0.840738	-0.646713	-1.51602	-2.01935	-1.66122	-3.21257	#NAME?	0.501557		1.57928	#NAME?	#NAME?		#NAME?	#NAME?
Q9UNQ2	Probable dimethyladenosine transferase	DIMT1	-0.0175712	0.00813803	-0.0947854	-0.390792	0.100535	-0.337238	1.66498	0.950407	0.56252	0.560581	0.458806	0.342164	#NAME?	0.0690813		0.878528	#NAME?	#NAME?		#NAME?	#NAME?
Q9BTE7	DCN1-like protein 5	DCUN1D5	-1.77365	-2.3801	-1.89412	-3.16462	-2.38186	-2.61119	-0.400985	-2.0709	-1.25569	-1.57434	-0.786984	-1.61465	#NAME?	0.695051		1.08366	#NAME?	#NAME?		#NAME?	#NAME?
Q13363	C-terminal-binding protein 1	CTBP1	0.191357	0.306669	0.285748	-0.00675984	0.525752	-0.493882	1.64259	0.509573	0.692319	0.94422	1.42503	1.00308	#NAME?	0.676664		0.901322	#NAME?	#NAME?		#NAME?	#NAME?
O96019	Actin-like protein 6A	ACTL6A	3.82709	1.56016	1.25494	1.30186	1.57354	0.910218	2.66569	3.51877	3.57546	3.53354	2.33358	2.85507	#NAME?	0.16251		1.34239	#NAME?	#NAME?		#NAME?	#NAME?
Q9Y2Y1	DNA-directed RNA polymerase III subunit RPC10	POLR3K	0.359375	-1.49868	-0.760736	-1.15042	-2.32666	-0.566686	-0.139458	0.503723	0.537622	0.281937	-0.6529	1.51375	#NAME?	0.642915		1.33141	#NAME?	#NAME?		#NAME?	#NAME?
Q9H944	Mediator of RNA polymerase II transcription subunit 20	MED20	-1.02687	-0.911381	-1.55493	-1.62173	-0.81048	-1.21643	-0.248395	-0.168106	-0.710422	-0.817534	0.208442	-0.291578	#NAME?	0.81762		0.852372	#NAME?	#NAME?		#NAME?	#NAME?
Q96D46	60S ribosomal export protein NMD3	NMD3	-0.242997	-0.260678	-0.684481	-0.0996962	-0.547571	-0.368087	2.26607	0.178836	-0.267185	0.110822	2.08072	-0.00889449	#NAME?	0.00237275		1.09398	#NAME?	#NAME?		#NAME?	#NAME?
Q99988	Growth/differentiation factor 15	GDF15	2.52972	2.79778	2.38842	2.29632	1.77168	2.45947	3.16237	2.4264	3.50087	3.21809	4.21577	3.74226	#NAME?	0.233673		1.00373	#NAME?	#NAME?		#NAME?	#NAME?
Q9BRX8	Peroxiredoxin-like 2A	PRXL2A	2.53405	2.67208	2.70048	2.68606	3.13929	2.17209	3.25915	3.03856	3.69424	3.90853	3.81347	3.17182	#NAME?	0.721516		0.830286	#NAME?	#NAME?		#NAME?	#NAME?
O43491	Band 4.1-like protein 2	EPB41L2	1.60949	1.84126	1.50077	1.86668	2.29537	1.66456	3.79671	2.62169	2.43379	2.67434	4.55774	2.33361	#NAME?	0.0233159		1.27329	#NAME?	#NAME?		#NAME?	#NAME?
P04278	Sex hormone-binding globulin	SHBG	-4.61834	-5.03169	-2.7354	-4.587	-4.29007	-3.97162	-3.11377	-4.44365	-1.93949	-1.95232	-2.46134	-3.09776	#NAME?	0.730717		1.37096	#NAME?	#NAME?		#NAME?	#NAME?
O43731	ER lumen protein-retaining receptor 3	KDELR3	-2.19153	-2.56597	-2.9347	-2.99004	-3.11794	-3.66714	-0.723201	-2.07362	-2.46325	-2.57106	-1.26185	-1.55211	#NAME?	0.440835		1.13704	#NAME?	#NAME?		#NAME?	#NAME?
Q96PE3	Inositol polyphosphate-4-phosphatase type I A	INPP4A	-4.87901	-6.37237	-5.4646	-6.37993	-6.44155	-6.44505	-4.28763	-3.98419	-4.54567	-4.03629	-3.80568	-6.652	#NAME?	0.330363		1.44517	#NAME?	#NAME?		#NAME?	#NAME?
Q7Z5L9	Interferon regulatory factor 2-binding protein 2	IRF2BP2	0.407015	-0.682311	-0.662937	-1.2855	-0.164302	-0.711804	0.34083	-0.142886	1.21849	0.678615	0.437265	0.509477	#NAME?	0.586744		1.02361	#NAME?	#NAME?		#NAME?	#NAME?
Q6NYC1	Bifunctional arginine demethylase and lysyl-hydroxylase JMJD6	JMJD6	-0.264076	-0.431851	0.0329274	-0.651819	-1.04933	-0.107341	0.170488	0.922315	0.299747	0.53043	1.0266	-0.00972435	#NAME?	0.909391		0.901891	#NAME?	#NAME?		#NAME?	#NAME?
P20337	Ras-related protein Rab-3B	RAB3B	-6.08721	-6.1623	-6.49186	-6.23091	-6.56847	-6.48735	-3.80499	-6.01035	-3.01763	-1.94702	-6.81407	-5.34931	#NAME?	0.000152373		1.84745	#NAME?	#NAME?		#NAME?	#NAME?
P02689	Myelin P2 protein	PMP2	-6.26052	-6.39062	-6.38399	-6.22161	-2.92137	-6.56852	-2.43313	-2.60601	-6.42493	-6.30673	-1.61362	-3.23664	#NAME?	0.416443		2.02093	#NAME?	#NAME?		#NAME?	#NAME?
P36537	UDP-glucuronosyltransferase 2B10	UGT2B10	1.51895	-2.323	-6.43937	-6.26957	-1.66524	-6.60697	-6.49466	1.3328	1.68684	0.931104	-4.48995	0.518885	#NAME?	0.924197		2.54503	#NAME?	#NAME?		#NAME?	#NAME?
P08962	CD63 antigen	CD63	0.416486	0.269096	-0.238307	-0.0592915	0.731143	-0.307335	0.477491	0.459709	1.16437	1.20664	2.04393	1.72559	#NAME?	0.338881		1.04432	#NAME?	#NAME?		#NAME?	#NAME?
Q9NVE5	Ubiquitin carboxyl-terminal hydrolase 40	USP40	-3.5548	-6.4511	-6.39506	-6.41795	-6.63068	-6.5795	-3.62578	-3.63424	-3.94718	-4.18406	-4.8632	-6.36966	#NAME?	0.772965		1.56749	#NAME?	#NAME?		#NAME?	#NAME?
P49768	Presenilin-1	PSEN1	-0.956717	-2.03748	-2.18007	-3.95348	-2.53664	-4.18827	-2.22349	-0.574062	-0.439159	0.518146	-2.0539	-1.57703	#NAME?	0.769205		1.58386	#NAME?	#NAME?		#NAME?	#NAME?
Q9UBU6	Protein FAM8A1	FAM8A1	-0.224024	-0.605917	-1.12936	-0.731792	-0.746586	-0.966399	0.851688	0.244787	-0.184271	0.0489591	0.662344	-0.503928	#NAME?	0.303038		0.920609	#NAME?	#NAME?		#NAME?	#NAME?
P09104	Gamma-enolase	ENO2	2.49994	1.93043	1.65204	1.92687	2.84716	2.00882	6.06908	2.7723	5.35251	2.23887	4.76624	2.18138	#NAME?	0.0100066		1.75252	#NAME?	#NAME?		#NAME?	#NAME?
Q92685	Dol-P-Man:Man(5)GlcNAc(2)-PP-Dol alpha-1,3-mannosyltransferase	ALG3	-1.62459	-3.97835	-4.43351	-3.76976	-3.69095	-4.83386	-3.61984	-1.91178	-2.56157	-2.32026	-1.18911	-2.09272	#NAME?	0.491687		1.43929	#NAME?	#NAME?		#NAME?	#NAME?
P46952	3-hydroxyanthranilate 3,4-dioxygenase	HAAO	-0.277229	-0.972339	-0.622574	-0.956098	-0.816804	-0.54987	1.37714	0.193035	-0.0542882	0.0815953	0.739028	-0.515692	#NAME?	0.0688416		1.00262	#NAME?	#NAME?		#NAME?	#NAME?
Q8N201	Integrator complex subunit 1	INTS1	-0.327536	-0.206052	-0.376959	-0.651518	-2.24127	-0.483054	3.17077	-0.267566	-0.396496	-0.550158	2.60189	1.09853	#NAME?	0.122129		1.65723	#NAME?	#NAME?		#NAME?	#NAME?
Q5VZF2	Muscleblind-like protein 2	MBNL2	-1.11209	-4.81549	-3.82141	-4.87345	-6.48902	-4.05817	-1.07388	-0.888633	-1.3995	-1.52005	-2.0589	-6.57325	#NAME?	0.681543		1.94257	#NAME?	#NAME?		#NAME?	#NAME?
Q99538	Legumain	LGMN	-0.747232	-0.783173	-0.888178	-1.46631	-6.47599	-1.59427	2.22399	0.295698	-0.933426	-1.49804	2.48268	-1.59326	#NAME?	0.675487		2.15546	#NAME?	#NAME?		#NAME?	#NAME?
P23368	NAD-dependent malic enzyme, mitochondrial	ME2	-0.472875	0.754272	0.339053	0.355027	-1.06376	0.420814	4.2825	1.26605	2.98439	1.37394	4.27676	-1.71056	#NAME?	0.0190973		2.02343	#NAME?	#NAME?		#NAME?	#NAME?
O60841	Eukaryotic translation initiation factor 5B	EIF5B	3.02754	2.01639	1.16013	1.70406	2.45988	1.44067	2.22894	2.97456	3.59285	3.02747	3.0717	3.42276	#NAME?	0.42786		1.08494	#NAME?	#NAME?		#NAME?	#NAME?
Q8IV36	Protein HID1	HID1	-4.96238	-6.25104	-4.52235	-4.87962	-4.63433	-5.42747	-2.79141	-2.1899	-2.95548	-3.61449	-5.48892	-4.89485	#NAME?	0.151459		1.45702	#NAME?	#NAME?		#NAME?	#NAME?
Q9H9J2	39S ribosomal protein L44, mitochondrial	MRPL44	0.540431	0.0161967	0.00638009	-0.292503	-0.988534	-0.404187	1.21689	0.359544	0.732169	0.852484	0.861214	0.34794	#NAME?	0.365765		0.91541	#NAME?	#NAME?		#NAME?	#NAME?
Q9H6T0	Epithelial splicing regulatory protein 2	ESRP2	0.189528	-2.64258	-2.23579	-0.19318	-3.01569	-2.61624	-0.960946	0.0235277	0.0640129	-0.183454	-0.429533	0.246685	#NAME?	0.0241442		1.54571	#NAME?	#NAME?		#NAME?	#NAME?
Q5TC63	Growth hormone-regulated TBC protein 1	GRTP1	-1.99743	-6.25839	-6.34332	-3.26914	-6.43119	-6.48008	-2.44414	-1.54491	-6.37124	-2.74382	-2.32244	-3.21466	#NAME?	0.740042		2.02306	#NAME?	#NAME?		#NAME?	#NAME?
Q6ZRS2	Helicase SRCAP	SRCAP	-3.28123	-4.93517	-6.36092	-6.17658	-6.51918	-6.47348	-3.60278	-3.70903	-3.94417	-5.34895	-2.82583	-5.05483	#NAME?	0.517713		1.5435	#NAME?	#NAME?		#NAME?	#NAME?
O94829	Importin-13	IPO13	-3.41422	-6.08565	-6.83251	-6.4444	-5.68653	-5.36095	-3.43654	-5.54482	-0.409261	-0.251085	-4.76587	-6.51407	#NAME?	0.110601		2.15044	#NAME?	#NAME?		#NAME?	#NAME?
A0AV96	RNA-binding protein 47	RBM47	-5.54905	-3.39636	-3.70195	-3.23686	-5.28799	-3.27643	-2.88436	-3.4388	-2.64579	-3.12799	-2.48521	-2.16389	#NAME?	0.0904605		1.28377	#NAME?	#NAME?		#NAME?	#NAME?
Q53GQ0	Very-long-chain 3-oxoacyl-CoA reductase	HSD17B12	3.63143	3.75262	3.93918	3.63492	4.13083	3.7673	4.77004	4.16303	4.30371	4.44185	5.37331	4.59089	#NAME?	0.103186		0.797756	#NAME?	#NAME?		#NAME?	#NAME?
P13984	General transcription factor IIF subunit 2	GTF2F2	-0.777594	-0.749922	-0.7265	-0.974756	0.163985	-0.729968	2.19698	-0.173258	-0.379045	-0.261334	1.94406	-0.36181	#NAME?	0.0284131		1.12672	#NAME?	#NAME?		#NAME?	#NAME?
Q5JPH6	Probable glutamate--tRNA ligase, mitochondrial	EARS2	0.67029	0.811919	0.675128	1.00217	0.554268	0.833308	1.31631	1.00048	1.62717	1.74831	2.35044	1.8897	#NAME?	0.0324071		0.897554	#NAME?	#NAME?		#NAME?	#NAME?
Q9H0R6	Glutamyl-tRNA(Gln) amidotransferase subunit A, mitochondrial	QRSL1	1.03416	-1.66731	-1.14268	-2.97518	-4.41353	-1.93963	-2.05401	0.614225	2.25655	2.28494	-3.58184	3.09836	#NAME?	0.415834		2.28707	#NAME?	#NAME?		#NAME?	#NAME?
Q9Y5L3	Ectonucleoside triphosphate diphosphohydrolase 2	ENTPD2	0.401976	0.270188	0.0259083	0.20884	0.021727	-0.00220362	0.798078	0.781376	0.673318	0.585355	0.728588	0.501507	#NAME?	0.458229		0.523631	#NAME?	#NAME?		#NAME?	#NAME?
Q8N766	ER membrane protein complex subunit 1	EMC1	2.36598	3.42618	2.39667	1.91618	2.5837	-0.620844	5.03917	2.36202	2.98571	2.94638	5.19231	3.42878	#NAME?	0.736801		1.64775	#NAME?	#NAME?		#NAME?	#NAME?
Q5T8D3	Acyl-CoA-binding domain-containing protein 5	ACBD5	-0.39743	-0.295489	-0.403879	-0.539933	0.803629	-0.349059	-0.790487	1.67925	1.87754	2.3793	0.0380934	2.05794	#NAME?	0.0591803		1.40397	#NAME?	#NAME?		#NAME?	#NAME?
Q13526	Peptidyl-prolyl cis-trans isomerase NIMA-interacting 1	PIN1	-1.12794	-1.15309	-0.664053	-2.19487	-0.274861	-1.32567	2.00519	-0.178778	-0.523195	-0.738612	1.22956	-0.382977	#NAME?	0.264148		1.35861	#NAME?	#NAME?		#NAME?	#NAME?
Q9Y291	28S ribosomal protein S33, mitochondrial	MRPS33	0.951501	-0.0537433	0.2216	-0.583235	0.212457	-0.0387792	1.12071	1.24569	1.23678	0.945305	0.49999	1.19594	#NAME?	0.245684		0.922437	#NAME?	#NAME?		#NAME?	#NAME?
Q8TC12	Retinol dehydrogenase 11	RDH11	3.61893	3.2834	3.17527	3.27199	3.89544	3.12988	4.10936	3.6706	3.92899	4.28893	4.92951	4.50147	#NAME?	0.406389		0.842325	#NAME?	#NAME?		#NAME?	#NAME?
O14730	Serine/threonine-protein kinase RIO3	RIOK3	-1.32384	-1.99179	-1.93234	-1.11877	-1.39789	-1.91499	0.506876	-1.42677	-0.822443	-0.847567	1.38122	-0.571176	#NAME?	0.0441453		1.31663	#NAME?	#NAME?		#NAME?	#NAME?
Q9Y666	Solute carrier family 12 member 7	SLC12A7	-2.54434	-3.53427	-3.5828	-3.18024	-3.90957	-3.63679	-2.82103	-2.08936	-1.35004	-2.08568	-3.13213	-2.66532	#NAME?	0.53294		1.04074	#NAME?	#NAME?		#NAME?	#NAME?
P08621	U1 small nuclear ribonucleoprotein 70 kDa	SNRNP70	2.41667	2.13242	2.18718	2.0248	2.36346	1.67974	3.62086	2.21132	3.09	2.92673	4.47107	3.17075	#NAME?	0.0390823		1.11441	#NAME?	#NAME?		#NAME?	#NAME?
Q9UQQ1	Aminopeptidase NAALADL1	NAALADL1	-2.75635	-6.16702	-6.49442	-3.74967	-3.5309	-6.41641	-2.04915	-2.60571	-2.06155	-3.07916	-2.82687	-6.59244	#NAME?	0.975904		1.64998	#NAME?	#NAME?		#NAME?	#NAME?
P07199	Major centromere autoantigen B	CENPB	-1.71333	-2.07537	0.570258	-2.07428	-1.84443	-2.68668	0.187523	-1.64759	-0.170475	-0.33446	3.60482	-0.77154	#NAME?	0.326757		1.78202	#NAME?	#NAME?		#NAME?	#NAME?
Q13572	Inositol-tetrakisphosphate 1-kinase	ITPK1	-6.29185	-5.00552	-4.47185	-4.27079	-4.71716	-3.25147	-3.33318	-2.10251	-2.33907	-2.04452	-7.00548	-2.32405	#NAME?	0.173841		1.47664	#NAME?	#NAME?		#NAME?	#NAME?
P53801	Pituitary tumor-transforming gene 1 protein-interacting protein	PTTG1IP	1.60333	1.61989	2.14703	2.41358	1.2349	2.37301	3.04884	1.96683	2.8894	2.70474	3.04888	3.69111	#NAME?	0.741604		0.993004	#NAME?	#NAME?		#NAME?	#NAME?
O00515	Ladinin-1	LAD1	4.21463	-0.613188	0.467913	3.54177	-0.0957929	-1.25027	0.131351	3.88455	3.88223	3.96594	1.51932	3.88396	#NAME?	0.496139		1.83371	#NAME?	#NAME?		#NAME?	#NAME?
Q9HCY8	Protein S100-A14	S100A14	-1.84242	-3.84298	-2.56255	-4.64592	-6.44543	-5.58526	-3.89614	-2.70352	-1.48459	-1.39481	-3.3841	-1.60262	#NAME?	0.302639		1.74313	#NAME?	#NAME?		#NAME?	#NAME?
Q53LP3	Ankyrin repeat domain-containing protein SOWAHC	SOWAHC	-0.0950377	-1.22487	-2.81745	-1.21089	-0.476112	-1.18098	-0.855885	-0.133561	0.527293	0.860226	-0.416897	0.538701	#NAME?	0.467758		1.2542	#NAME?	#NAME?		#NAME?	#NAME?
P52943	Cysteine-rich protein 2	CRIP2	-1.6837	-0.768788	-1.28808	-1.56142	-1.47231	-1.6776	0.0341971	-0.646718	-0.750287	-0.625016	-1.04165	-0.623679	#NAME?	0.967487		0.79979	#NAME?	#NAME?		#NAME?	#NAME?
Q99943	1-acyl-sn-glycerol-3-phosphate acyltransferase alpha	AGPAT1	-2.63829	-4.28043	-3.67827	-4.64048	-3.31314	-7.59179	-1.5731	-2.55767	-2.66956	-3.19857	-2.82971	-3.10335	#NAME?	0.0321245		1.70174	#NAME?	#NAME?		#NAME?	#NAME?
Q5VUA4	Zinc finger protein 318	ZNF318	-1.95795	-6.448	-6.33704	-6.44744	-6.47218	-1.99205	-2.40671	-0.888597	-0.932999	-1.10589	-7.01409	-3.71696	#NAME?	0.930905		2.26491	#NAME?	#NAME?		#NAME?	#NAME?
Q99549	M-phase phosphoprotein 8	MPHOSPH8	-3.1319	-3.10345	-6.2765	-6.30152	-6.50854	-6.62274	-2.83213	-3.03711	-6.37496	-2.788	-4.01783	-3.19735	#NAME?	0.646777		1.61621	#NAME?	#NAME?		#NAME?	#NAME?
Q8IX01	SURP and G-patch domain-containing protein 2	SUGP2	-0.233346	-2.21074	-1.60977	-1.29277	-2.1957	-2.54142	-0.40998	-0.0949811	-1.07667	-0.74651	-0.742989	-0.401178	#NAME?	0.0731718		1.10191	#NAME?	#NAME?		#NAME?	#NAME?
P08572	Collagen alpha-2(IV) chain	COL4A2	-0.176655	-0.681809	-6.27433	-6.47635	-1.09961	-1.61534	-1.4013	0.700904	-0.596106	0.244514	-0.711371	-1.25197	#NAME?	0.0163177		2.21813	#NAME?	#NAME?		#NAME?	#NAME?
Q8TCT9	Minor histocompatibility antigen H13	HM13	3.46844	3.22806	3.11129	2.99728	3.87862	2.98216	3.29243	3.57532	4.57142	4.46725	4.77981	5.04296	#NAME?	0.148795		1.01056	#NAME?	#NAME?		#NAME?	#NAME?
Q9Y2H1	Serine/threonine-protein kinase 38-like	STK38L	-6.18368	-4.45922	-3.59227	-6.68097	-6.53348	-6.4301	-3.99703	-4.25069	-3.57807	-3.3733	-5.10735	-4.95539	#NAME?	0.211067		1.43632	#NAME?	#NAME?		#NAME?	#NAME?
O95671	Probable bifunctional dTTP/UTP pyrophosphatase/methyltransferase protein	ASMTL	-2.06793	0.124418	0.501106	0.0923745	0.132387	0.913245	1.54504	-0.406506	1.55605	1.43638	1.55367	1.05681	#NAME?	0.534511		1.17431	#NAME?	#NAME?		#NAME?	#NAME?
Q9BTV4	Transmembrane protein 43	TMEM43	1.93046	2.38285	0.734598	2.11539	2.42698	2.48607	4.67259	2.03629	2.55256	2.70583	4.69742	2.44158	#NAME?	0.226747		1.17165	#NAME?	#NAME?		#NAME?	#NAME?
Q9UKU9	Angiopoietin-related protein 2	ANGPTL2	-1.92696	-1.72085	-2.245	-0.733436	-1.3073	-4.28431	-0.19698	-1.67374	-0.332271	0.176811	-0.618835	-1.22835	#NAME?	0.235594		1.39075	#NAME?	#NAME?		#NAME?	#NAME?
Q8IV48	3'-5' exoribonuclease 1	ERI1	-3.12731	-2.13936	-3.45589	-2.62485	-6.4291	-3.58896	-2.23723	-2.48283	-1.39939	-1.30301	-2.27566	-2.66357	#NAME?	0.0530354		1.50063	#NAME?	#NAME?		#NAME?	#NAME?
P35813	Protein phosphatase 1A	PPM1A	-4.91557	-3.6143	-5.89061	-3.71172	-4.79264	-2.28784	-3.40991	-4.07577	-1.88769	-1.96263	-3.46538	-1.08953	#NAME?	0.862609		1.55363	#NAME?	#NAME?		#NAME?	#NAME?
P11908	Ribose-phosphate pyrophosphokinase 2	PRPS2	-0.692309	-1.80108	-2.36882	-1.47556	-1.52463	-2.72402	0.341041	-1.20048	-0.349354	-0.770513	-0.00726441	-1.59159	#NAME?	0.969383		1.16804	#NAME?	#NAME?		#NAME?	#NAME?
Q9BXT5	Testis-expressed protein 15	TEX15	1.05497	0.852946	1.37002	1.42743	1.8066	-6.57431	1.52292	1.10621	2.33574	2.50146	3.24819	3.3044	#NAME?	0.0133345		2.34688	#NAME?	#NAME?		#NAME?	#NAME?
Q86T03	Type 1 phosphatidylinositol 4,5-bisphosphate 4-phosphatase	PIP4P1	-3.32938	-0.819426	-0.903951	-0.845989	-2.8524	-1.49132	0.907603	-0.416132	-0.834537	-0.0102268	0.841402	-1.9393	#NAME?	0.949942		1.46521	#NAME?	#NAME?		#NAME?	#NAME?
Q9NZM3	Intersectin-2	ITSN2	-2.7352	-2.91149	-4.6796	-3.26149	-2.35231	-3.39027	-4.19184	-0.991397	-0.851414	-0.37961	-3.18297	0.0622197	#NAME?	0.127521		1.63256	#NAME?	#NAME?		#NAME?	#NAME?
O00291	Huntingtin-interacting protein 1	HIP1	-0.803406	-1.30526	-1.69498	-2.50571	-1.59458	-2.35038	-0.370037	-1.05406	-0.953139	-0.618965	-0.273795	-1.13345	#NAME?	0.245097		0.975146	#NAME?	#NAME?		#NAME?	#NAME?
Q9BSD7	Cancer-related nucleoside-triphosphatase	NTPCR	-0.641215	-0.469873	-1.10575	-0.650746	-0.267513	-0.885743	-0.263511	0.0716866	-0.27913	0.448862	0.00685383	0.457785	#NAME?	0.841073		0.743899	#NAME?	#NAME?		#NAME?	#NAME?
Q92917	G-patch domain and KOW motifs-containing protein	GPKOW	-0.534066	-0.188478	-2.35782	-0.647568	-0.472151	-0.677042	1.44964	-0.55541	1.07371	1.08111	1.25854	-0.651153	#NAME?	0.669462		1.42226	#NAME?	#NAME?		#NAME?	#NAME?
Q9GZW8	Membrane-spanning 4-domains subfamily A member 7	MS4A7	-6.2917	-6.44296	-3.39386	-3.1456	-6.60407	-6.59486	-6.3902	-6.17394	-2.32859	-2.19383	-2.72126	0.126889	#NAME?	0.379117		2.13202	#NAME?	#NAME?		#NAME?	#NAME?
O75569	Interferon-inducible double-stranded RNA-dependent protein kinase activator A	PRKRA	1.86315	1.47235	1.56746	0.894338	-0.752048	1.21736	2.45125	2.39246	2.18386	2.06379	2.59968	1.89288	#NAME?	0.0145745		1.22022	#NAME?	#NAME?		#NAME?	#NAME?
P29279	CCN family member 2	CCN2	2.30901	2.00254	2.79697	2.72525	-5.62294	2.54088	4.29557	2.26491	2.85554	2.96516	4.74988	3.83404	#NAME?	0.0159439		2.3689	#NAME?	#NAME?		#NAME?	#NAME?
Q13617	Cullin-2	CUL2	-0.566564	-0.0366754	-0.0130085	-0.349863	0.441117	-0.638351	2.19318	-0.0522916	0.260683	0.4295	2.3743	0.896099	#NAME?	0.0616173		1.2108	#NAME?	#NAME?		#NAME?	#NAME?
Q03252	Lamin-B2	LMNB2	1.95064	2.22383	1.75902	1.65428	2.12288	1.98573	2.4037	2.0118	2.81778	2.90569	3.09964	3.15846	#NAME?	0.137428		0.783449	#NAME?	#NAME?		#NAME?	#NAME?
Q86WA8	Lon protease homolog 2, peroxisomal	LONP2	-1.90057	-0.897774	-1.12039	-2.14996	-2.89796	-3.75502	-0.485524	-0.897724	-1.13078	-0.556335	-0.53996	-1.30738	#NAME?	0.026152		1.30066	#NAME?	#NAME?		#NAME?	#NAME?
Q9UBF2	Coatomer subunit gamma-2	COPG2	1.03964	0.79698	0.463539	0.290299	0.829854	0.512437	1.50084	0.643791	1.37324	1.81774	2.38871	1.56608	#NAME?	0.141636		0.892941	#NAME?	#NAME?		#NAME?	#NAME?
P04732	Metallothionein-1E	MT1E	-3.0521	-4.57333	-2.83908	-6.27244	-6.43019	-2.85481	-1.39254	-0.874116	-1.48929	-1.81091	-5.81449	-5.30587	#NAME?	0.589964		1.55579	#NAME?	#NAME?		#NAME?	#NAME?
Q9H089	Large subunit GTPase 1 homolog	LSG1	-1.25894	-0.222341	-0.716844	-0.192848	-1.27955	-0.0937806	0.453447	0.849936	0.354353	0.459276	0.958176	-0.739089	#NAME?	0.820622		1.01673	#NAME?	#NAME?		#NAME?	#NAME?
Q6JQN1	Acyl-CoA dehydrogenase family member 10	ACAD10	0.881845	-2.41815	-3.02182	-2.6638	-2.70384	-0.0739702	-0.214383	1.17654	-0.570284	0.839644	-2.04982	1.02591	#NAME?	0.553271		1.70122	#NAME?	#NAME?		#NAME?	#NAME?
Q96DR4	StAR-related lipid transfer protein 4	STARD4	-6.13278	-6.39886	-4.50509	-3.70061	-2.75114	-4.39215	-3.10536	-2.17313	-2.90599	-4.24795	-3.95638	-2.58247	#NAME?	0.241743		1.48489	#NAME?	#NAME?		#NAME?	#NAME?
Q5W0V3	Protein FAM160B1	FAM160B1	-6.43432	-6.39176	-6.33445	-6.44319	-6.66936	-6.3644	-4.14792	-3.63538	-6.50938	-6.81946	-4.01235	-4.74005	#NAME?	5.66629e-05		1.46216	#NAME?	#NAME?		#NAME?	#NAME?
Q92979	Ribosomal RNA small subunit methyltransferase NEP1	EMG1	0.819338	0.769119	0.602146	0.398613	0.385148	0.652964	1.36222	1.88954	1.66824	1.49234	0.481559	1.54051	#NAME?	0.0502164		0.80118	#NAME?	#NAME?		#NAME?	#NAME?
Q9BXB5	Oxysterol-binding protein-related protein 10	OSBPL10	-1.76885	-1.72722	-1.5457	-1.53933	-1.82984	-2.54279	-1.04994	-0.998483	-0.950828	-1.54048	-0.651667	-1.18822	#NAME?	0.618648		0.76235	#NAME?	#NAME?		#NAME?	#NAME?
Q13423	NAD(P) transhydrogenase, mitochondrial	NNT	2.41306	1.65847	1.76477	1.90165	2.3075	1.78655	3.90695	2.37719	3.25629	2.55037	5.37191	2.44949	#NAME?	0.011704		1.3467	#NAME?	#NAME?		#NAME?	#NAME?
Q96KB5	Lymphokine-activated killer T-cell-originated protein kinase	PBK	-2.05905	-1.07763	-4.44894	-1.35764	-1.68807	-0.941575	-0.29571	-1.68904	-0.180596	-0.150585	-1.03166	0.230968	#NAME?	0.206597		1.40938	#NAME?	#NAME?		#NAME?	#NAME?
O75431	Metaxin-2	MTX2	0.475997	0.940714	0.610419	0.331412	0.268556	0.6307	3.94175	0.747023	0.76276	0.512384	4.95583	0.612714	#NAME?	0.000282393		1.37911	#NAME?	#NAME?		#NAME?	#NAME?
Q9UK61	Protein TASOR	TASOR	0.475922	-0.429873	-0.815519	-0.257934	-0.433915	-0.875022	0.0941215	0.715324	0.645697	0.0535435	0.426172	0.834348	#NAME?	0.407642		0.850924	#NAME?	#NAME?		#NAME?	#NAME?
Q96IY1	Kinetochore-associated protein NSL1 homolog	NSL1	-4.54014	-6.32357	-6.43307	-6.25867	-6.47682	-6.40868	-6.48028	-3.47053	-1.9511	-1.56287	-6.96795	-4.56697	#NAME?	0.0311062		1.90687	#NAME?	#NAME?		#NAME?	#NAME?
O15381	Nuclear valosin-containing protein-like	NVL	-1.19855	-1.70249	-2.25015	-1.9186	-0.0170477	1.18942	-0.433454	-0.618629	0.860874	1.09017	-0.0314295	2.5869	#NAME?	0.841285		1.55864	#NAME?	#NAME?		#NAME?	#NAME?
O15239	NADH dehydrogenase [ubiquinone] 1 alpha subcomplex subunit 1	NDUFA1	-1.23309	-1.4092	-0.536448	-0.624627	-1.31144	-0.0336046	0.100154	-0.257251	-0.350119	-0.415256	0.858086	1.69349	#NAME?	0.364295		1.12959	#NAME?	#NAME?		#NAME?	#NAME?
P49590	Probable histidine--tRNA ligase, mitochondrial	HARS2	-0.365639	0.753151	0.382779	1.0799	0.972349	1.40769	2.33325	0.278769	2.62838	2.68061	1.57362	1.84208	#NAME?	0.441815		1.18441	#NAME?	#NAME?		#NAME?	#NAME?
P52597	Heterogeneous nuclear ribonucleoprotein F	HNRNPF	3.78682	3.64554	3.54929	3.15904	3.81663	3.49652	4.02998	3.88213	4.2188	4.31003	4.54938	4.2374	#NAME?	0.931605		0.628981	#NAME?	#NAME?		#NAME?	#NAME?
Q9BVM4	Gamma-glutamylaminecyclotransferase	GGACT	-6.11193	-6.36891	-6.4537	-6.27174	-6.40417	-6.49416	-2.57729	-2.28687	-6.37696	-6.26919	-3.22506	-6.63608	#NAME?	1.50038e-05		1.78886	#NAME?	#NAME?		#NAME?	#NAME?
Q06481	Amyloid-like protein 2	APLP2	1.35749	0.994838	1.10095	1.25397	1.23721	1.31229	1.31478	1.72578	2.16383	2.0874	2.28034	2.44684	#NAME?	0.0292505		0.793704	#NAME?	#NAME?		#NAME?	#NAME?
Q9UJX4	Anaphase-promoting complex subunit 5	ANAPC5	-1.27111	-2.31943	-0.0893856	-2.39116	-3.77879	0.490709	0.0316626	-0.515861	-0.200305	0.0901728	0.334829	0.253789	#NAME?	0.00283161		1.55891	#NAME?	#NAME?		#NAME?	#NAME?
Q7Z3U7	Protein MON2 homolog	MON2	-0.0323963	-1.71567	-1.61127	-2.25913	0.20736	-2.5001	-0.488019	0.874878	0.601246	0.887911	-1.11174	-0.502935	#NAME?	0.537567		1.36209	#NAME?	#NAME?		#NAME?	#NAME?
Q8N1S5	Zinc transporter ZIP11	SLC39A11	-2.23313	-1.58214	-1.72737	-1.75719	-1.27688	-1.87866	-1.16199	-1.52378	-1.0158	-0.955702	-0.542762	-0.846675	#NAME?	0.946358		0.734779	#NAME?	#NAME?		#NAME?	#NAME?
Q9BRX2	Protein pelota homolog	PELO	0.925941	-0.00779576	-0.249138	-0.195499	0.091112	-0.442774	1.28634	0.721902	0.559592	0.47976	1.938	0.812031	#NAME?	0.7672		0.945964	#NAME?	#NAME?		#NAME?	#NAME?
Q6P9B6	MTOR-associated protein MEAK7	MEAK7	-2.23363	-2.95395	-2.12762	-5.40052	-4.03687	-6.47886	-3.3381	-0.446565	-1.27151	-1.67668	-3.50157	-2.73298	#NAME?	0.433572		1.71067	#NAME?	#NAME?		#NAME?	#NAME?
Q56P03	E2F-associated phosphoprotein	EAPP	-6.22311	-2.67583	-2.09129	-4.35821	-6.41922	-2.93433	-2.50398	-1.49667	-3.30417	-0.973732	-3.3949	-2.8882	#NAME?	0.19123		1.69006	#NAME?	#NAME?		#NAME?	#NAME?
Q14790	Caspase-8	CASP8	0.599314	-1.02756	-0.23946	-1.45734	0.666151	-1.14469	2.64215	1.01934	-0.160753	-0.104059	2.32865	0.182181	#NAME?	0.52566		1.41852	#NAME?	#NAME?		#NAME?	#NAME?
Q6ZMZ3	Nesprin-3	SYNE3	-6.22403	-6.31403	-3.72016	-4.0025	-4.94992	-3.5564	-3.43664	-4.24868	-3.93402	-4.04626	-1.94952	-2.67841	#NAME?	0.498014		1.41225	#NAME?	#NAME?		#NAME?	#NAME?
Q8IWZ3	Ankyrin repeat and KH domain-containing protein 1	ANKHD1	-0.994646	-0.43007	-0.824613	0.0225496	-2.91588	-0.605039	-2.20776	2.06665	2.27353	2.45867	-1.91548	2.76892	#NAME?	0.0970997		1.86537	#NAME?	#NAME?		#NAME?	#NAME?
Q9UKN8	General transcription factor 3C polypeptide 4	GTF3C4	0.268776	-1.08562	1.13581	-1.32201	-0.933845	-1.45193	0.591042	0.0249811	0.857216	0.855854	1.06198	0.650155	#NAME?	0.0366319		1.23834	#NAME?	#NAME?		#NAME?	#NAME?
P38571	Lysosomal acid lipase/cholesteryl ester hydrolase	LIPA	-0.672577	-2.4249	-2.34899	-3.91392	-4.09894	0.567814	1.0303	-0.174556	-1.13441	-0.401737	-0.597571	-1.68651	#NAME?	0.163052		1.6545	#NAME?	#NAME?		#NAME?	#NAME?
P04844	Dolichyl-diphosphooligosaccharide--protein glycosyltransferase subunit 2	RPN2	5.1822	4.39448	4.46979	4.05189	4.31857	3.65633	4.81011	5.21435	5.51828	5.22017	5.31678	4.9163	#NAME?	0.173067		0.820454	#NAME?	#NAME?		#NAME?	#NAME?
Q9P0P8	Uncharacterized protein C6orf203	C6orf203	-3.37401	-2.32695	-2.46807	-2.54563	-2.58786	-3.5812	-1.60888	-1.79081	-1.7913	-1.78918	-2.58885	-2.1154	#NAME?	0.407087		0.866551	#NAME?	#NAME?		#NAME?	#NAME?
P06396	Gelsolin	GSN	2.11359	2.07081	2.5622	2.61221	2.71575	3.13882	3.21731	2.90827	3.14381	3.2769	3.45296	3.77772	#NAME?	0.52512		0.760596	#NAME?	#NAME?		#NAME?	#NAME?
Q9UG63	ATP-binding cassette sub-family F member 2	ABCF2	0.910653	-0.335602	-0.333282	-0.419893	0.363142	-0.0293988	0.927673	0.482752	0.700946	0.969097	1.59659	0.727374	#NAME?	0.516113		0.874802	#NAME?	#NAME?		#NAME?	#NAME?
O60488	Long-chain-fatty-acid--CoA ligase 4	ACSL4	3.84066	3.85535	5.30081	3.92703	4.24349	3.95555	4.99014	4.32608	5.15382	5.21076	5.77016	5.29535	#NAME?	0.700478		0.937238	#NAME?	#NAME?		#NAME?	#NAME?
Q32MZ4	Leucine-rich repeat flightless-interacting protein 1	LRRFIP1	-0.80178	-2.99367	-2.07804	-2.70534	-0.989344	-2.60266	-1.10716	-0.613047	2.63504	2.98333	-1.33693	-3.34094	#NAME?	0.0516575		1.89852	#NAME?	#NAME?		#NAME?	#NAME?
P53794	Sodium/myo-inositol cotransporter	SLC5A3	-2.48668	-6.43485	-4.24196	-6.38522	-6.54346	-5.35767	-2.3983	-3.24653	-4.85056	-4.33883	-2.92103	-4.29168	#NAME?	0.276353		1.56715	#NAME?	#NAME?		#NAME?	#NAME?
Q14978	Nucleolar and coiled-body phosphoprotein 1	NOLC1	1.80358	1.71722	1.30632	1.44993	1.40424	1.53165	1.99369	2.1374	2.34024	2.08343	1.96979	1.88742	#NAME?	0.702333		0.533176	#NAME?	#NAME?		#NAME?	#NAME?
Q9P0K7	Ankycorbin	RAI14	-2.25773	-1.24376	-3.09226	-4.53848	-0.702731	-4.67978	-0.794498	-1.18741	-1.46329	-1.94377	-0.983083	-0.724823	#NAME?	0.0137291		1.56964	#NAME?	#NAME?		#NAME?	#NAME?
P08754	Guanine nucleotide-binding protein G(i) subunit alpha	GNAI3	0.580006	0.659318	0.041326	-0.395427	0.0792853	0.77873	0.969436	0.792605	0.973287	0.877375	1.67617	1.31237	#NAME?	0.509336		0.809667	#NAME?	#NAME?		#NAME?	#NAME?
Q14151	Scaffold attachment factor B2	SAFB2	-2.10538	-6.22778	-3.40698	-2.84869	-5.06383	-1.84699	-2.0434	-2.01986	-1.43782	-2.10024	-2.62982	-1.65497	#NAME?	0.00672232		1.60226	#NAME?	#NAME?		#NAME?	#NAME?
O75151	Lysine-specific demethylase PHF2	PHF2	-6.21144	-6.25798	-6.51762	-6.28039	-6.56349	-6.45964	-6.40973	-3.92688	-3.63891	-3.97292	-6.79153	-3.86352	#NAME?	0.00013176		1.61451	#NAME?	#NAME?		#NAME?	#NAME?
Q6PCE3	Glucose 1,6-bisphosphate synthase	PGM2L1	-6.14102	-6.38064	-2.13788	-6.38976	-6.58115	-3.67508	-1.78051	-2.96482	-3.33037	-3.30532	-2.42287	-6.52682	#NAME?	0.795456		1.82914	#NAME?	#NAME?		#NAME?	#NAME?
Q5TC12	ATP synthase mitochondrial F1 complex assembly factor 1	ATPAF1	-0.829278	-2.39479	-2.07106	-2.34018	-3.42333	-2.36037	-1.31622	-0.131001	0.00110792	-0.0809339	-1.296	-2.75213	#NAME?	0.582442		1.30731	#NAME?	#NAME?		#NAME?	#NAME?
P30408	Transmembrane 4 L6 family member 1	TM4SF1	3.14132	3.03982	2.73404	2.49408	2.70636	1.94956	3.25999	3.17633	3.68724	3.49278	3.63803	3.25914	#NAME?	0.16247		0.74139	#NAME?	#NAME?		#NAME?	#NAME?
P49281	Natural resistance-associated macrophage protein 2	SLC11A2	-0.0841171	-0.1066	-0.162265	-0.211654	-4.34188	-0.325404	-0.960969	1.75947	0.95263	1.00344	0.679442	0.791648	#NAME?	0.18787		1.57626	#NAME?	#NAME?		#NAME?	#NAME?
Q5T0F9	Coiled-coil and C2 domain-containing protein 1B	CC2D1B	-0.629591	-6.31974	-6.52228	-6.45738	-6.61287	-6.40604	-0.449454	-2.66717	-4.94878	-4.55348	-0.719633	-6.55511	#NAME?	0.951979		2.17571	#NAME?	#NAME?		#NAME?	#NAME?
Q9NW82	WD repeat-containing protein 70	WDR70	-0.190771	-0.141608	-0.0446761	-0.148545	-0.209316	-0.495018	-0.643437	2.75331	3.85989	3.85756	-1.2746	4.08964	#NAME?	1.06793e-05		2.31205	#NAME?	#NAME?		#NAME?	#NAME?
P06746	DNA polymerase beta	POLB	-0.438105	-0.958357	-4.58596	-0.588016	-1.41501	-1.48906	-0.254722	-0.0405192	-0.0370369	-0.0508377	0.16214	-0.325877	#NAME?	0.000201314		1.48794	#NAME?	#NAME?		#NAME?	#NAME?
Q13426	DNA repair protein XRCC4	XRCC4	-3.75385	-4.07628	-3.81109	-5.25588	-3.95735	-4.95939	-2.81426	-2.61114	-4.61856	-3.06342	-3.00074	-3.3022	#NAME?	0.811656		1.06725	#NAME?	#NAME?		#NAME?	#NAME?
Q8NBJ5	Procollagen galactosyltransferase 1	COLGALT1	3.24046	2.69476	2.91518	2.97694	2.86206	2.76504	3.16339	3.34302	3.61973	3.53095	3.5009	4.02045	#NAME?	0.385742		0.620665	#NAME?	#NAME?		#NAME?	#NAME?
P51617	Interleukin-1 receptor-associated kinase 1	IRAK1	-6.09514	-5.125	-6.2575	-6.37739	-6.36592	-6.65048	-4.14299	-4.74053	-6.2656	-6.36613	-3.91838	-4.08597	#NAME?	0.129096		1.2253	#NAME?	#NAME?		#NAME?	#NAME?
Q9H553	Alpha-1,3/1,6-mannosyltransferase ALG2	ALG2	-1.12468	0.422827	0.517849	-1.68296	-0.971843	2.63576	3.0138	0.257453	0.547571	0.633087	3.62753	0.128788	#NAME?	0.955672		1.40188	#NAME?	#NAME?		#NAME?	#NAME?
O60238	BCL2/adenovirus E1B 19 kDa protein-interacting protein 3-like	BNIP3L	-1.87507	-1.79463	-2.83489	-2.39792	-0.70207	-4.23752	-1.38575	-1.93979	-0.369413	-1.35009	-0.892341	-0.181866	#NAME?	0.232955		1.28714	#NAME?	#NAME?		#NAME?	#NAME?
O95678	Keratin, type II cytoskeletal 75	KRT75	-0.938397	-1.7608	-1.82617	-1.55266	-1.12318	-2.38229	-1.03603	-0.230827	-0.0748049	-0.250947	-1.78817	-0.116069	#NAME?	0.555568		1.01444	#NAME?	#NAME?		#NAME?	#NAME?
P03928	ATP synthase protein 8	MT-ATP8	-0.731852	-0.307425	-0.279856	-0.437708	-0.246578	-0.682737	0.0650318	-0.530955	1.03335	0.626134	0.880323	0.627812	#NAME?	0.0443606		0.897976	#NAME?	#NAME?		#NAME?	#NAME?
O75396	Vesicle-trafficking protein SEC22b	SEC22B	2.61551	2.9441	-0.832651	2.67653	-1.02242	0.458323	1.07646	3.1276	3.31663	3.23676	0.776088	2.77181	#NAME?	0.327155		1.24433	#NAME?	#NAME?		#NAME?	#NAME?
Q8N490	Probable hydrolase PNKD	PNKD	-4.81918	-2.87196	-2.86269	-3.44668	-6.36986	-4.5534	-1.96029	-2.47347	-1.50987	-3.31265	-2.17188	-4.59585	#NAME?	0.672462		1.4833	#NAME?	#NAME?		#NAME?	#NAME?
P19086	Guanine nucleotide-binding protein G(z) subunit alpha	GNAZ	-6.19614	-2.87939	-2.38685	-2.97092	-1.87436	-3.1315	-5.11197	3.81135	4.32822	4.70274	-6.90018	-3.05107	#NAME?	0.0166343		2.86971	#NAME?	#NAME?		#NAME?	#NAME?
P14649	Myosin light chain 6B	MYL6B	-1.41295	-1.32032	-2.81849	-2.51988	-1.36083	-2.58808	-1.4319	-0.358025	-0.365606	-0.731922	-1.10837	-1.82502	#NAME?	0.709203		1.03328	#NAME?	#NAME?		#NAME?	#NAME?
O14925	Mitochondrial import inner membrane translocase subunit Tim23	TIMM23	3.11421	-0.385901	-1.17291	-0.529502	3.43983	-0.232294	3.48265	3.14438	0.956826	0.758316	3.54502	2.85787	#NAME?	0.327601		1.75194	#NAME?	#NAME?		#NAME?	#NAME?
Q9Y606	tRNA pseudouridine synthase A	PUS1	0.99889	0.362847	0.344188	0.95997	1.20862	2.00001	1.69951	1.4058	2.13745	2.37093	2.43108	1.42748	#NAME?	0.549831		0.932953	#NAME?	#NAME?		#NAME?	#NAME?
P24311	Cytochrome c oxidase subunit 7B, mitochondrial	COX7B	0.676729	0.197453	-0.00276782	0.0157745	0.106549	-0.188873	0.935013	0.639257	1.47034	0.996324	1.01561	0.235217	#NAME?	0.476361		0.747817	#NAME?	#NAME?		#NAME?	#NAME?
Q13443	Disintegrin and metalloproteinase domain-containing protein 9	ADAM9	-2.83541	-4.55087	-4.28339	-4.59078	-3.9514	-4.64849	-6.42831	-2.53842	-1.90243	-2.31118	-2.55819	-2.48025	#NAME?	0.0736684		1.10693	#NAME?	#NAME?		#NAME?	#NAME?
Q99575	Ribonucleases P/MRP protein subunit POP1	POP1	-2.69466	-3.51775	-4.11993	-3.24197	-4.13553	-4.33967	-3.81677	-2.46861	-2.63091	-2.59836	-2.57142	-1.86987	#NAME?	0.99428		1.01559	#NAME?	#NAME?		#NAME?	#NAME?
Q9BYN8	28S ribosomal protein S26, mitochondrial	MRPS26	-0.13597	-1.58677	-1.50299	-1.07783	-1.08583	0.382366	1.84251	0.429384	-0.112793	-0.215699	2.13512	-1.06231	#NAME?	0.334112		1.3372	#NAME?	#NAME?		#NAME?	#NAME?
P27338	Amine oxidase [flavin-containing] B	MAOB	0.0662361	0.0917542	0.406197	-0.155913	-0.0452435	0.24943	-0.0562015	0.125923	2.44975	2.72813	0.607954	3.49782	#NAME?	0.000428166		1.45682	#NAME?	#NAME?		#NAME?	#NAME?
Q8NEE6	Dynein regulatory complex subunit 6	FBXL13	-3.28923	-6.21224	-6.31624	-6.23679	-2.8388	-2.90903	-0.877812	-2.72209	-2.12833	-2.50651	-1.81271	-6.59199	#NAME?	0.824349		1.86048	#NAME?	#NAME?		#NAME?	#NAME?
Q16878	Cysteine dioxygenase type 1	CDO1	-6.22525	-2.61308	-2.55726	-2.42805	-6.36345	-6.51945	-6.45496	-1.53155	-0.075973	-0.0910869	-6.87024	0.0410342	#NAME?	0.351976		1.95396	#NAME?	#NAME?		#NAME?	#NAME?
Q9BUV8	Uncharacterized protein RAB5IF	RAB5IF	-0.00304194	0.245989	-0.367014	-0.285772	-1.37158	-2.27493	0.417029	0.0330522	0.0784335	0.119813	1.14151	0.817063	#NAME?	0.127421		1.11054	#NAME?	#NAME?		#NAME?	#NAME?
Q8NI27	THO complex subunit 2	THOC2	1.59111	0.987173	0.936485	1.15667	0.623664	0.772841	1.41308	1.45965	1.65503	1.80371	2.00204	1.69108	#NAME?	0.36159		0.659439	#NAME?	#NAME?		#NAME?	#NAME?
Q676U5	Autophagy-related protein 16-1	ATG16L1	-0.638104	-3.3043	-3.23386	-1.31781	-0.85304	-5.41973	-0.284275	-0.488364	-1.34912	-0.788278	-1.02906	-1.11352	#NAME?	0.00432684		1.61904	#NAME?	#NAME?		#NAME?	#NAME?
O75817	Ribonuclease P protein subunit p20	POP7	-2.17122	-2.84206	-2.07365	-4.78527	-1.84226	-2.70628	-1.81615	-1.28988	-0.835198	-0.804738	-2.30585	-2.0771	#NAME?	0.280559		1.2153	#NAME?	#NAME?		#NAME?	#NAME?
Q9UHA3	Probable ribosome biogenesis protein RLP24	RSL24D1	-0.04877	0.321091	-0.537701	-0.409159	-1.07226	-0.191353	4.9508	-0.206627	0.0312986	-0.1641	5.75096	-0.627067	#NAME?	0.00113783		1.94557	#NAME?	#NAME?		#NAME?	#NAME?
Q7L2E3	ATP-dependent RNA helicase DHX30	DHX30	2.47256	0.78236	-0.829023	1.12596	3.00603	1.47098	3.9806	2.70524	1.86616	2.01095	3.89764	2.09487	#NAME?	0.467933		1.4211	#NAME?	#NAME?		#NAME?	#NAME?
Q9BX10	GTP-binding protein 2	GTPBP2	-3.14758	-3.91804	-3.82042	-6.26509	-1.87091	-2.77096	-1.62671	-2.43761	-3.18552	-2.95518	-1.73105	-1.27048	#NAME?	0.177675		1.43107	#NAME?	#NAME?		#NAME?	#NAME?
O95954	Formimidoyltransferase-cyclodeaminase	FTCD	2.52201	-0.0773588	0.206704	-0.287731	-2.33008	0.847347	0.799811	2.48078	1.97151	1.94937	0.512294	1.96377	#NAME?	0.142338		1.46611	#NAME?	#NAME?		#NAME?	#NAME?
Q13416	Origin recognition complex subunit 2	ORC2	-1.30905	-0.723951	-2.50318	-0.485428	0.174133	-4.27921	0.333154	-1.40413	0.0659512	-0.169117	0.773795	0.120279	#NAME?	0.107614		1.47444	#NAME?	#NAME?		#NAME?	#NAME?
P50402	Emerin	EMD	-1.03793	-0.928758	-1.39903	-0.721107	-1.18939	-1.32008	1.3651	-1.13672	-0.402397	-0.360612	2.0194	-0.347386	#NAME?	0.00366671		1.28895	#NAME?	#NAME?		#NAME?	#NAME?
P53007	Tricarboxylate transport protein, mitochondrial	SLC25A1	3.85716	3.54757	3.81877	3.60205	3.4835	3.82008	4.29341	3.8498	4.24939	4.39506	5.11697	4.35443	#NAME?	0.0620237		0.688322	#NAME?	#NAME?		#NAME?	#NAME?
Q9Y3B3	Transmembrane emp24 domain-containing protein 7	TMED7	2.58578	2.64356	2.79146	2.74577	2.06837	2.53128	3.21622	2.55871	3.16293	3.49453	4.01003	3.54913	#NAME?	0.198458		0.770888	#NAME?	#NAME?		#NAME?	#NAME?
Q15436	Protein transport protein Sec23A	SEC23A	2.34819	2.45854	2.0456	2.29397	-0.820789	2.22974	2.74173	3.0015	3.36592	3.09609	3.31491	2.92132	#NAME?	0.00219986		1.31437	#NAME?	#NAME?		#NAME?	#NAME?
O43660	Pleiotropic regulator 1	PLRG1	1.45041	1.7495	0.0871574	-0.354208	1.28119	-0.576982	1.74788	1.95089	1.33034	1.34295	2.80553	1.37827	#NAME?	0.239743		1.15313	#NAME?	#NAME?		#NAME?	#NAME?
Q9NR50	Translation initiation factor eIF-2B subunit gamma	EIF2B3	2.71709	-0.025968	-1.35616	-1.47194	-4.57368	-1.74483	-1.01291	3.0444	2.81045	3.47095	-1.87729	-0.353138	#NAME?	0.979341		2.08966	#NAME?	#NAME?		#NAME?	#NAME?
Q8IVW6	AT-rich interactive domain-containing protein 3B	ARID3B	-5.0107	-2.68164	-5.26719	-2.43908	-2.09355	-3.23628	-1.75368	-2.12244	-2.00293	-2.11786	-2.06534	-2.53961	#NAME?	0.00222506		1.35443	#NAME?	#NAME?		#NAME?	#NAME?
Q9UH65	Switch-associated protein 70	SWAP70	-5.4422	-6.39321	-3.69021	-5.46763	-4.35755	-4.04346	-2.46534	-3.10072	-2.96035	-4.00255	-5.12866	-4.03611	#NAME?	0.880449		1.28342	#NAME?	#NAME?		#NAME?	#NAME?
P02545	Prelamin-A/C	LMNA	4.13327	4.1441	4.25456	4.26446	4.66218	4.16034	6.55136	4.23198	5.16275	5.05743	6.42617	4.81712	#NAME?	0.0044584		1.10465	#NAME?	#NAME?		#NAME?	#NAME?
Q9NUW8	Tyrosyl-DNA phosphodiesterase 1	TDP1	-1.54299	-4.88076	-3.31691	-4.0368	-3.89916	-6.62148	-2.49298	-2.24867	-0.15192	0.240723	-4.42294	-4.38713	#NAME?	0.715165		1.80586	#NAME?	#NAME?		#NAME?	#NAME?
Q5JTV8	Torsin-1A-interacting protein 1	TOR1AIP1	2.78229	2.66031	2.7226	2.20588	2.82753	1.89487	3.63541	2.99429	3.44945	3.65724	3.88026	2.46739	#NAME?	0.490027		0.831761	#NAME?	#NAME?		#NAME?	#NAME?
Q9HCS2	Cytochrome P450 4F12	CYP4F12	-5.04077	-3.99704	-6.53607	-6.4954	-6.61792	-3.77041	-2.41183	-2.90828	-3.75556	-3.64887	-4.05569	-6.51127	#NAME?	0.874537		1.52768	#NAME?	#NAME?		#NAME?	#NAME?
O00267	Transcription elongation factor SPT5	SUPT5H	1.29702	2.11098	0.879441	1.19315	2.22954	0.882494	2.06593	2.24148	2.50411	2.5747	2.0585	2.1054	#NAME?	0.0551262		0.826249	#NAME?	#NAME?		#NAME?	#NAME?
Q9UKS6	Protein kinase C and casein kinase substrate in neurons protein 3	PACSIN3	-0.414041	-1.6505	-1.71075	-1.45294	-0.775127	-1.75648	-0.834799	-0.422698	0.0440482	-0.256972	-1.11694	0.370424	#NAME?	0.959218		0.923819	#NAME?	#NAME?		#NAME?	#NAME?
Q6Y288	Beta-1,3-glucosyltransferase	B3GLCT	-3.35518	-3.50422	-4.02894	-5.09924	-3.78176	-6.45138	-1.48791	-2.80775	-3.00261	-3.12703	-3.56604	-4.28276	#NAME?	0.593706		1.32444	#NAME?	#NAME?		#NAME?	#NAME?
Q02224	Centromere-associated protein E	CENPE	-0.656266	-1.681	-6.28123	-2.13853	-1.99796	-4.17132	-6.40542	0.0764609	-1.14097	0.397393	-0.568299	-1.50124	#NAME?	0.673262		1.29737	#NAME?	#NAME?		#NAME?	#NAME?
Q9P0V3	SH3 domain-binding protein 4	SH3BP4	-4.39448	-5.95604	-3.54713	-4.02089	-3.02776	-6.4378	-1.05293	-5.69638	-2.5317	-4.5887	0.391556	-3.1259	#NAME?	0.294991		1.79667	#NAME?	#NAME?		#NAME?	#NAME?
P51532	Transcription activator BRG1	SMARCA4	2.86751	2.40349	2.97737	2.96952	2.57717	2.89693	2.99985	2.85628	4.16932	4.11445	3.62925	4.49112	#NAME?	0.0398145		0.928045	#NAME?	#NAME?		#NAME?	#NAME?
Q9Y5Y2	Cytosolic Fe-S cluster assembly factor NUBP2	NUBP2	1.31118	1.02079	1.51175	1.30646	1.00409	1.39836	1.65518	1.49526	1.78015	1.99529	2.09887	1.84816	#NAME?	0.876235		0.553378	#NAME?	#NAME?		#NAME?	#NAME?
P38435	Vitamin K-dependent gamma-carboxylase	GGCX	1.4252	1.49616	1.03161	1.48947	1.2611	1.41441	2.20867	2.00208	1.75689	1.85654	2.57023	1.56367	#NAME?	0.154756		0.640023	#NAME?	#NAME?		#NAME?	#NAME?
Q9ULG6	Cell cycle progression protein 1	CCPG1	-6.01229	-1.89818	-5.02794	-1.86548	-5.40091	-5.44414	-3.75558	-2.77881	-2.54872	-2.42946	-1.96438	-2.61633	#NAME?	0.0243421		1.59261	#NAME?	#NAME?		#NAME?	#NAME?
Q9UIF9	Bromodomain adjacent to zinc finger domain protein 2A	BAZ2A	-0.896501	-2.22277	-2.10936	-2.45263	-6.36369	-2.58891	-2.99898	-0.911079	-0.657155	-0.274167	-2.67291	1.21295	#NAME?	0.719431		1.72209	#NAME?	#NAME?		#NAME?	#NAME?
Q96JH7	Deubiquitinating protein VCIP135	VCPIP1	-0.540576	-0.205484	-0.330298	-0.479384	-0.24908	-0.963883	0.775479	-0.815385	1.01572	1.12997	0.43479	0.139799	#NAME?	0.0573534		0.90818	#NAME?	#NAME?		#NAME?	#NAME?
O94887	FERM, ARHGEF and pleckstrin domain-containing protein 2	FARP2	-3.2386	-3.90746	-4.09002	-4.2593	-5.71342	-6.59722	-2.93659	-2.49036	-3.78577	-2.97601	-6.33308	-3.08326	#NAME?	0.819322		1.03349	#NAME?	#NAME?		#NAME?	#NAME?
P14555	Phospholipase A2, membrane associated	PLA2G2A	2.22057	2.90424	1.71366	2.77325	-6.47141	2.54238	2.77509	1.96253	3.12952	3.00497	4.71938	3.70648	#NAME?	0.00918803		2.26921	#NAME?	#NAME?		#NAME?	#NAME?
Q9UJ83	2-hydroxyacyl-CoA lyase 1	HACL1	-1.28549	-3.51116	-2.28176	-3.50048	-6.60667	-0.430082	-1.40444	-0.581655	-1.61646	-1.11905	-2.64708	-0.225764	#NAME?	0.0606362		1.6702	#NAME?	#NAME?		#NAME?	#NAME?
Q9Y680	Peptidyl-prolyl cis-trans isomerase FKBP7	FKBP7	1.60716	-1.54091	-0.439557	-1.84222	2.86291	-1.25732	1.94811	1.64898	1.06449	0.947662	2.02254	1.29501	#NAME?	0.00678232		1.58945	#NAME?	#NAME?		#NAME?	#NAME?
Q13451	Peptidyl-prolyl cis-trans isomerase FKBP5	FKBP5	2.45889	2.16119	1.52025	2.0457	2.06612	1.47522	2.35606	2.12548	2.74405	2.61405	3.50695	3.44162	#NAME?	0.413869		0.843474	#NAME?	#NAME?		#NAME?	#NAME?
Q5H8A4	GPI ethanolamine phosphate transferase 2	PIGG	-2.99415	-3.55415	-0.882582	-2.95744	-2.32402	-1.754	1.65528	-1.63526	-1.6897	-2.37152	0.94279	-2.23944	#NAME?	0.229016		1.52141	#NAME?	#NAME?		#NAME?	#NAME?
P10515	Dihydrolipoyllysine-residue acetyltransferase component of pyruvate dehydrogenase complex, mitochondrial	DLAT	2.56615	2.13235	2.66194	2.42652	2.2356	2.3337	3.0112	2.64326	2.7796	2.94512	3.48803	3.03686	#NAME?	0.438182		0.591299	#NAME?	#NAME?		#NAME?	#NAME?
P01344	Insulin-like growth factor II	IGF2	0.818593	0.146395	0.0866335	0.250886	-0.165858	1.34989	1.09254	0.436329	1.3705	1.11774	2.2137	1.93732	#NAME?	0.784406		0.946932	#NAME?	#NAME?		#NAME?	#NAME?
O75976	Carboxypeptidase D	CPD	-0.248441	0.238875	-0.150563	0.244787	0.163362	1.14547	4.41065	0.207564	0.39728	0.593273	4.20931	-0.0244703	#NAME?	0.00662908		1.40002	#NAME?	#NAME?		#NAME?	#NAME?
Q08J23	tRNA (cytosine(34)-C(5))-methyltransferase	NSUN2	0.853309	1.6301	1.91995	1.75307	0.782418	2.04048	2.63777	2.37267	2.30686	2.67512	2.83571	1.11272	#NAME?	0.769493		0.826923	#NAME?	#NAME?		#NAME?	#NAME?
P20290	Transcription factor BTF3	BTF3	1.7035	1.90644	2.30474	1.84423	1.39123	1.21654	3.54548	2.357	2.20733	2.27518	3.26311	1.98953	#NAME?	0.301935		0.878491	#NAME?	#NAME?		#NAME?	#NAME?
Q9BT09	Protein canopy homolog 3	CNPY3	0.389603	0.482149	0.435631	-0.238064	-3.22305	0.397705	0.38812	0.856738	1.10184	1.31946	1.30982	1.47529	#NAME?	0.0127781		1.36788	#NAME?	#NAME?		#NAME?	#NAME?
Q5JV73	FERM and PDZ domain-containing protein 3	FRMPD3	-1.63958	-1.74581	-6.52447	-5.11245	-4.91886	-3.64391	8.51628	-4.99191	-5.19258	-6.27577	9.18754	-2.85479	#NAME?	0.0129567		3.66231	#NAME?	#NAME?		#NAME?	#NAME?
Q16822	Phosphoenolpyruvate carboxykinase [GTP], mitochondrial	PCK2	3.69209	2.14693	2.11037	2.78223	3.59759	1.78171	3.21438	3.60721	3.31092	3.73598	3.759	4.29599	#NAME?	0.128049		0.968762	#NAME?	#NAME?		#NAME?	#NAME?
Q9NR12	PDZ and LIM domain protein 7	PDLIM7	-0.289818	-1.79475	-2.17583	-2.2067	-2.64993	-2.27596	-0.99047	-0.207386	-0.960329	-0.72909	-1.6484	-0.848222	#NAME?	0.226399		1.00152	#NAME?	#NAME?		#NAME?	#NAME?
Q9UQ90	Paraplegin	SPG7	-2.51951	-0.982735	-0.97185	-1.65753	-1.74494	-1.31023	-0.965933	-1.63009	0.0845373	0.40684	1.11949	-1.31229	#NAME?	0.200862		1.14822	#NAME?	#NAME?		#NAME?	#NAME?
O75570	Peptide chain release factor 1, mitochondrial	MTRF1	-2.0447	-5.31072	-4.2587	-4.22399	-3.46496	-6.38723	0.445646	-2.48453	-6.32975	-3.46707	0.000330456	-2.73248	#NAME?	0.293478		1.85374	#NAME?	#NAME?		#NAME?	#NAME?
Q15392	Delta(24)-sterol reductase	DHCR24	3.56662	3.59217	3.17752	2.61928	3.42332	2.65387	4.04926	3.60365	4.00429	3.65317	4.19784	3.74625	#NAME?	0.212293		0.703609	#NAME?	#NAME?		#NAME?	#NAME?
O00462	Beta-mannosidase	MANBA	-6.1213	-5.65416	-6.40854	-6.11616	-5.21155	-2.32327	-3.50846	-2.1569	-2.22929	-2.43351	-4.96108	-6.629	#NAME?	0.713591		1.65279	#NAME?	#NAME?		#NAME?	#NAME?
Q14108	Lysosome membrane protein 2	SCARB2	2.31819	0.761695	-2.40688	0.242956	1.49101	-0.0133376	-0.0455082	2.16008	3.07705	2.86206	0.89862	2.54833	#NAME?	0.564661		1.51783	#NAME?	#NAME?		#NAME?	#NAME?
Q14161	ARF GTPase-activating protein GIT2	GIT2	-2.61793	-4.08946	-4.40664	-4.60138	-2.79782	-1.08926	-1.13598	-1.72556	-2.23519	-1.72471	-2.18717	-2.95519	#NAME?	0.10975		1.27312	#NAME?	#NAME?		#NAME?	#NAME?
Q9NPL8	Complex I assembly factor TIMMDC1, mitochondrial	TIMMDC1	-2.85526	-2.57645	-6.43068	-2.74827	-3.08478	-6.59608	0.654304	-2.33729	-1.96636	-2.8441	0.76918	-6.58057	#NAME?	0.469227		1.99778	#NAME?	#NAME?		#NAME?	#NAME?
Q03701	CCAAT/enhancer-binding protein zeta	CEBPZ	1.93949	0.425408	1.06047	0.336399	-0.427744	0.0132692	1.60109	1.61831	1.60231	1.37045	2.00971	1.20861	#NAME?	0.0273818		1.01053	#NAME?	#NAME?		#NAME?	#NAME?
Q86TU7	Actin-histidine N-methyltransferase	SETD3	-2.78325	-2.57547	-2.38976	-3.91128	-2.84753	-2.76217	-0.405886	-1.59626	-1.78364	-1.60435	-2.77984	-2.82832	#NAME?	0.276699		1.04519	#NAME?	#NAME?		#NAME?	#NAME?
Q96C01	Protein FAM136A	FAM136A	2.31745	2.38402	0.898064	0.883663	2.34264	0.471599	3.12419	2.37514	4.23256	3.40579	0.96256	2.62791	#NAME?	0.642882		1.23845	#NAME?	#NAME?		#NAME?	#NAME?
Q8IXB1	DnaJ homolog subfamily C member 10	DNAJC10	-0.0968265	-0.0175344	-0.20341	-0.0220561	0.171974	-0.306472	2.74568	0.0138067	0.487177	0.748773	2.06781	0.378411	#NAME?	0.000851208		1.15266	#NAME?	#NAME?		#NAME?	#NAME?
Q9NXX6	Non-structural maintenance of chromosomes element 4 homolog A	NSMCE4A	-6.23323	-6.18988	-6.46446	-6.32488	-6.50922	-6.55488	-3.78016	-6.03091	-6.23432	-6.3202	-1.22027	-6.5531	#NAME?	1.99581e-05		1.35626	#NAME?	#NAME?		#NAME?	#NAME?
Q9UKF6	Cleavage and polyadenylation specificity factor subunit 3	CPSF3	0.411686	-0.551771	-0.609771	-0.783493	-1.35429	-1.4272	-0.46646	0.227016	0.556926	0.771726	-0.444775	0.700807	#NAME?	0.706486		0.943347	#NAME?	#NAME?		#NAME?	#NAME?
Q96JM3	Chromosome alignment-maintaining phosphoprotein 1	CHAMP1	-2.73757	-4.09895	-3.79441	-5.55471	-4.26666	-6.743	-1.15904	-2.69254	-4.6204	-1.23875	-4.6608	-3.55542	#NAME?	0.823759		1.54472	#NAME?	#NAME?		#NAME?	#NAME?
Q9NZD2	Glycolipid transfer protein	GLTP	-1.078	-4.36382	-5.33121	-6.41909	-0.996139	-5.83455	-0.23158	-1.11437	-2.48127	-1.4917	-0.185442	-6.48085	#NAME?	0.97261		2.00627	#NAME?	#NAME?		#NAME?	#NAME?
Q96G23	Ceramide synthase 2	CERS2	-0.409745	0.303949	-1.81885	-2.28114	2.91357	-1.78114	-0.008359	-0.528175	2.33593	1.88336	0.287074	2.91611	#NAME?	0.500809		1.65988	#NAME?	#NAME?		#NAME?	#NAME?
Q8ND76	Cyclin-Y	CCNY	-0.0866143	-0.632994	-1.7235	-0.475611	0.305207	-0.958608	1.10447	-0.00633376	0.258394	0.324381	1.43941	-0.556819	#NAME?	0.938182		1.02261	#NAME?	#NAME?		#NAME?	#NAME?
O43837	Isocitrate dehydrogenase [NAD] subunit beta, mitochondrial	IDH3B	1.97333	1.93442	1.69206	1.81663	2.2115	2.23813	2.68823	2.30053	2.6828	2.71918	3.60747	2.20896	#NAME?	0.0916982		0.723517	#NAME?	#NAME?		#NAME?	#NAME?
O75954	Tetraspanin-9	TSPAN9	-1.54512	-6.28405	-6.26004	-1.80077	-1.1218	-6.59172	-1.40826	-2.22305	-2.68753	-2.27422	-1.59682	-2.29726	#NAME?	0.001786		1.85272	#NAME?	#NAME?		#NAME?	#NAME?
Q6UW68	Transmembrane protein 205	TMEM205	1.33788	1.71826	1.87077	1.81046	1.72872	0.958052	2.52721	1.79464	2.50142	2.55234	2.50534	1.86635	#NAME?	0.976928		0.720526	#NAME?	#NAME?		#NAME?	#NAME?
Q9H501	ESF1 homolog	ESF1	1.66898	0.287007	1.14628	0.586971	0.603988	1.03039	3.28674	1.78939	1.4605	1.71628	1.84026	1.00689	#NAME?	0.35907		0.96274	#NAME?	#NAME?		#NAME?	#NAME?
Q9H6T3	RNA polymerase II-associated protein 3	RPAP3	-1.52887	-1.48229	-1.57797	-1.09341	-0.676908	-1.90231	-0.105478	-0.462699	-0.717521	-0.624905	0.0793632	-1.46955	#NAME?	0.615122		0.826826	#NAME?	#NAME?		#NAME?	#NAME?
Q92504	Zinc transporter SLC39A7	SLC39A7	0.789608	0.770231	1.17852	0.917536	0.473509	0.405594	1.37854	1.04768	1.42463	1.35233	1.45229	1.46582	#NAME?	0.209575		0.597716	#NAME?	#NAME?		#NAME?	#NAME?
Q96BQ5	Coiled-coil domain-containing protein 127	CCDC127	-1.03827	-1.88053	-2.58457	-2.36232	-3.24234	-2.81342	-2.45565	-0.52516	0.349028	-2.20003	-0.682964	-1.36034	#NAME?	0.497752		1.17439	#NAME?	#NAME?		#NAME?	#NAME?
P32322	Pyrroline-5-carboxylate reductase 1, mitochondrial	PYCR1	3.58315	3.85348	4.03269	3.91781	4.12473	4.04087	4.44001	3.86117	4.70383	4.85915	5.49671	5.01818	#NAME?	0.0377954		0.804388	#NAME?	#NAME?		#NAME?	#NAME?
P50452	Serpin B8	SERPINB8	-2.77283	-6.40715	-3.66322	-3.82086	-3.48495	-1.66869	-2.59876	-5.1929	-1.99127	-1.59639	-1.86899	-1.55926	#NAME?	0.789986		1.16835	#NAME?	#NAME?		#NAME?	#NAME?
Q9H0Z9	RNA-binding protein 38	RBM38	-5.12226	-6.24467	-6.46343	-6.49297	-6.35197	-6.49923	-4.45788	-4.78369	-5.20501	-6.40054	-3.72779	-6.11579	#NAME?	0.187616		1.08064	#NAME?	#NAME?		#NAME?	#NAME?
Q01546	Keratin, type II cytoskeletal 2 oral	KRT76	-0.34432	-0.418341	-1.72576	-2.05768	-0.254296	-0.183927	-0.358896	-0.604311	0.534834	0.699868	-0.227104	1.41777	#NAME?	0.871556		1.07441	#NAME?	#NAME?		#NAME?	#NAME?
P27487	Dipeptidyl peptidase 4	DPP4	1.34882	1.20826	2.12148	2.51909	2.07095	2.82565	4.52003	1.59175	2.78735	2.89539	5.37323	2.54439	#NAME?	0.110115		1.26965	#NAME?	#NAME?		#NAME?	#NAME?
P36543	V-type proton ATPase subunit E 1	ATP6V1E1	1.80986	1.57278	1.52295	1.19224	1.68294	1.43629	2.18037	2.27291	1.91362	2.13375	1.67809	2.29076	#NAME?	0.809592		0.542071	#NAME?	#NAME?		#NAME?	#NAME?
O60725	Protein-S-isoprenylcysteine O-methyltransferase	ICMT	-0.414153	-1.4413	-1.5399	-1.19579	-0.462138	-2.17816	-0.6368	-0.111566	-0.2257	-0.277567	-0.147166	-0.782058	#NAME?	0.0730151		0.841764	#NAME?	#NAME?		#NAME?	#NAME?
Q9Y4P1	Cysteine protease ATG4B	ATG4B	-0.408523	-0.89173	-1.23776	-1.06897	-0.141512	-0.49123	-0.534153	-0.324708	-0.00660429	0.518665	0.095211	0.637659	#NAME?	0.8714		0.770966	#NAME?	#NAME?		#NAME?	#NAME?
Q9H9Y6	DNA-directed RNA polymerase I subunit RPA2	POLR1B	-0.587242	-2.08611	-3.09259	-0.977406	0.0797555	-3.10578	-0.1939	0.22672	-1.3561	-1.12286	0.286135	-0.0896692	#NAME?	0.179061		1.25328	#NAME?	#NAME?		#NAME?	#NAME?
Q96JP2	Unconventional myosin-XVB	MYO15B	-2.62279	-3.40693	-3.46116	-3.65584	-2.84383	-3.15461	1.65778	-3.70319	-2.41496	-3.41479	2.26774	-2.7239	#NAME?	0.000748241		1.8023	#NAME?	#NAME?		#NAME?	#NAME?
Q9UHD2	Serine/threonine-protein kinase TBK1	TBK1	0.00866605	-0.686242	-1.29836	-0.541561	0.162286	-0.448789	2.62259	0.413779	-0.0907614	-0.282968	2.20741	-0.39361	#NAME?	0.0615977		1.21341	#NAME?	#NAME?		#NAME?	#NAME?
Q9Y276	Mitochondrial chaperone BCS1	BCS1L	0.118597	0.0601555	-0.212628	-0.381157	-0.0471787	-2.51283	-0.291645	-0.178086	2.44111	2.10722	-1.15572	2.80494	#NAME?	0.279385		1.45048	#NAME?	#NAME?		#NAME?	#NAME?
O94762	ATP-dependent DNA helicase Q5	RECQL5	-6.03291	-6.42318	-6.51772	-6.37406	-2.91869	-6.54187	-6.49891	-2.5687	-2.99167	-2.23239	-6.9215	-3.64273	#NAME?	0.443986		1.65875	#NAME?	#NAME?		#NAME?	#NAME?
Q6ZT21	Transmembrane protein with metallophosphoesterase domain	TMPPE	-1.95296	-3.61159	-2.77742	-4.17407	-2.03326	-4.39898	-2.97495	-2.25874	-1.5877	-1.69401	-2.02097	-1.88945	#NAME?	0.126286		1.08708	#NAME?	#NAME?		#NAME?	#NAME?
P52747	Zinc finger protein 143	ZNF143	0.378629	-6.3834	-3.15349	-3.43997	-6.58353	-6.56171	-3.73846	-2.58362	0.916786	-1.49888	-4.87666	-2.08225	#NAME?	0.481956		1.98006	#NAME?	#NAME?		#NAME?	#NAME?
Q9BUF5	Tubulin beta-6 chain	TUBB6	3.98617	4.21634	4.07589	4.08398	4.37081	4.77143	5.30406	4.13905	4.76167	4.80717	5.58865	5.49929	#NAME?	0.180243		0.765881	#NAME?	#NAME?		#NAME?	#NAME?
Q9Y4C8	Probable RNA-binding protein 19	RBM19	2.78245	-0.845939	-0.0740528	-1.106	-0.286658	-0.0974597	-1.40844	2.68528	3.13708	3.44953	-0.63595	2.95431	#NAME?	0.373267		1.63491	#NAME?	#NAME?		#NAME?	#NAME?
Q53H12	Acylglycerol kinase, mitochondrial	AGK	-0.649573	-1.01414	0.644209	-1.21217	-1.84467	-1.12163	-1.01841	1.29226	0.473555	-0.114412	-0.543724	1.82962	#NAME?	0.570127		1.18615	#NAME?	#NAME?		#NAME?	#NAME?
Q6YHU6	Thyroid adenoma-associated protein	THADA	-3.15968	-2.24932	-4.67758	-3.36838	-3.41415	-4.07432	-0.285819	-2.92062	-2.37424	-2.6209	-0.133867	-4.3038	#NAME?	0.168405		1.38403	#NAME?	#NAME?		#NAME?	#NAME?
Q8IVH8	Mitogen-activated protein kinase kinase kinase kinase 3	MAP4K3	-2.20705	-2.52645	-2.07872	-4.87656	-4.79641	-2.22748	0.253947	-2.38939	-1.6624	-2.5336	0.145394	-3.63603	#NAME?	0.748628		1.48177	#NAME?	#NAME?		#NAME?	#NAME?
O75155	Cullin-associated NEDD8-dissociated protein 2	CAND2	-6.23139	-6.18792	-6.13625	-6.33455	-6.44461	-6.45662	-3.86735	-4.84256	-4.39532	-4.09116	-6.80864	-6.50887	#NAME?	0.000142735		1.21291	#NAME?	#NAME?		#NAME?	#NAME?
P49757	Protein numb homolog	NUMB	0.244083	-0.615247	-0.58833	-0.274846	-0.381105	-0.98626	0.222511	0.214894	0.278588	-0.116573	1.03704	0.119109	#NAME?	0.908824		0.726212	#NAME?	#NAME?		#NAME?	#NAME?
Q9Y3A4	Ribosomal RNA-processing protein 7 homolog A	RRP7A	0.637585	-0.350673	-0.553431	0.0680449	0.00087931	0.0396581	0.605549	0.519104	1.10198	1.08165	0.514601	0.528598	#NAME?	0.449758		0.75157	#NAME?	#NAME?		#NAME?	#NAME?
Q16401	26S proteasome non-ATPase regulatory subunit 5	PSMD5	2.52109	2.36321	2.99861	2.5176	2.44071	0.611205	3.08174	2.43517	3.6527	4.09902	3.72531	2.60154	#NAME?	0.64258		1.02384	#NAME?	#NAME?		#NAME?	#NAME?
Q8N6G5	Chondroitin sulfate N-acetylgalactosaminyltransferase 2	CSGALNACT2	-6.0405	-3.36691	-4.59689	-6.27858	-4.14882	-4.26198	-6.57306	-3.83452	-3.1618	-2.92025	-3.10268	-3.01963	#NAME?	0.654534		1.01362	#NAME?	#NAME?		#NAME?	#NAME?
Q9Y2L1	Exosome complex exonuclease RRP44	DIS3	1.30661	0.612864	0.845325	0.63304	0.957114	0.18304	1.19966	1.02141	1.65676	1.50489	1.30799	1.84906	#NAME?	0.651501		0.66696	#NAME?	#NAME?		#NAME?	#NAME?
P05496	ATP synthase F(0) complex subunit C1, mitochondrial	ATP5MC1	1.97048	0.834679	-0.0151301	0.748926	0.397931	-0.49163	2.5734	1.75549	0.72391	2.10006	2.82533	0.344564	#NAME?	0.722162		1.14625	#NAME?	#NAME?		#NAME?	#NAME?
O75964	ATP synthase subunit g, mitochondrial	ATP5MG	3.36188	3.34438	3.69922	3.35138	3.64305	2.63799	4.15583	3.42702	4.24199	3.81963	4.47955	4.08494	#NAME?	0.950192		0.695175	#NAME?	#NAME?		#NAME?	#NAME?
Q13686	Nucleic acid dioxygenase ALKBH1	ALKBH1	-6.13498	-6.36704	-6.4027	-6.25926	-6.42588	-6.53404	-3.10157	-2.75062	-6.31794	-6.28125	-4.61987	-6.57168	#NAME?	3.80153e-05		1.41349	#NAME?	#NAME?		#NAME?	#NAME?
P11233	Ras-related protein Ral-A	RALA	1.51868	1.50807	1.46019	1.4883	1.35463	1.38715	1.61377	1.88266	2.01262	2.02605	2.46258	2.2027	#NAME?	0.00636056		0.580558	#NAME?	#NAME?		#NAME?	#NAME?
Q8IVS8	Glycerate kinase	GLYCTK	-3.82302	-5.13296	-5.27503	-4.91492	-3.02832	-6.39425	-4.67402	-3.081	-2.60977	-2.97603	-0.603507	-5.64757	#NAME?	0.409251		1.4961	#NAME?	#NAME?		#NAME?	#NAME?
Q9NP58	ATP-binding cassette sub-family B member 6, mitochondrial	ABCB6	-1.52443	-1.4902	-1.9641	-3.22872	-1.4925	-2.77015	-1.5529	-2.14251	-0.217838	0.0140698	-1.66519	-0.474461	#NAME?	0.714135		1.07188	#NAME?	#NAME?		#NAME?	#NAME?
Q96S59	Ran-binding protein 9	RANBP9	-2.66593	-2.32888	-1.60376	-2.31506	-4.10579	-3.5304	1.86689	-2.7154	-3.30655	-2.1709	1.00443	-1.81243	#NAME?	0.0879096		1.56931	#NAME?	#NAME?		#NAME?	#NAME?
P47974	mRNA decay activator protein ZFP36L2	ZFP36L2	-1.02738	-3.20794	-6.29622	-6.37693	-3.35704	-6.56827	-4.00959	-1.44487	-1.44686	-1.03888	-6.9352	-0.254098	#NAME?	0.844189		1.95071	#NAME?	#NAME?		#NAME?	#NAME?
Q96EC8	Protein YIPF6	YIPF6	0.17694	-0.897909	-0.671491	-0.803285	0.526507	-0.401121	0.695357	0.132516	-0.152546	0.668538	1.4352	0.35642	#NAME?	0.92641		0.86764	#NAME?	#NAME?		#NAME?	#NAME?
P03891	NADH-ubiquinone oxidoreductase chain 2	MT-ND2	0.0175434	-0.143607	-0.633839	-0.644997	-0.244787	-0.28049	0.333472	0.0679495	0.784231	0.132515	0.934726	-0.141276	#NAME?	0.332825		0.673632	#NAME?	#NAME?		#NAME?	#NAME?
Q9UMR5	Lysosomal thioesterase PPT2	PPT2	-0.568491	-1.94586	-1.61808	-5.0832	-2.3032	-1.82284	-0.795936	-0.526258	-1.59472	-0.474842	-2.05238	0.0325985	#NAME?	0.167036		1.32169	#NAME?	#NAME?		#NAME?	#NAME?
P48643	T-complex protein 1 subunit epsilon	CCT5	3.67761	4.71647	3.31656	3.17751	-0.505101	3.16958	4.81259	4.14263	5.02893	4.83629	4.04324	3.13894	#NAME?	0.0648295		1.40833	#NAME?	#NAME?		#NAME?	#NAME?
Q8TF05	Serine/threonine-protein phosphatase 4 regulatory subunit 1	PPP4R1	-0.232669	-0.518953	-0.488691	-0.750641	-0.468682	-6.56327	1.35093	-0.13729	-5.68547	-0.377179	1.31445	-0.140099	#NAME?	0.922514		0.891377	#NAME?	#NAME?		#NAME?	#NAME?
Q96EY4	Translation machinery-associated protein 16	TMA16	-1.15285	-2.42066	-1.95136	-2.84519	-1.11143	-4.34017	-0.836147	-1.20572	-1.14363	-0.533376	-2.02185	-1.26379	#NAME?	0.0751676		1.13619	#NAME?	#NAME?		#NAME?	#NAME?
Q15208	Serine/threonine-protein kinase 38	STK38	-1.40241	-2.3736	-1.63858	-0.83952	-6.83898	-1.28365	-1.47971	0.139136	-0.870556	-0.950469	-1.14389	-0.337921	#NAME?	0.010392		1.62222	#NAME?	#NAME?		#NAME?	#NAME?
Q9NQA3	WAS protein family homolog 6	WASH6P	-2.42034	-2.82603	-3.34091	-2.7899	-2.02556	-3.58456	-0.591303	-1.96549	-3.11029	-1.72417	-1.92053	-1.86252	#NAME?	0.482313		0.968833	#NAME?	#NAME?		#NAME?	#NAME?
Q9BTW9	Tubulin-specific chaperone D	TBCD	6.48053	2.51277	1.20987	2.65378	2.20057	-0.0391517	1.47597	6.33677	6.22218	6.48015	0.767821	6.05461	#NAME?	0.675184		2.05319	#NAME?	#NAME?		#NAME?	#NAME?
Q13435	Splicing factor 3B subunit 2	SF3B2	1.97248	1.05725	1.46819	1.17726	2.32391	1.25844	2.14655	1.95864	2.79732	2.75273	2.35056	1.8355	#NAME?	0.645644		0.763959	#NAME?	#NAME?		#NAME?	#NAME?
Q7Z4W1	L-xylulose reductase	DCXR	2.47741	2.56107	2.67725	2.67208	2.83479	2.41013	3.29337	3.09674	3.36206	3.25998	3.05862	2.64041	#NAME?	0.269646		0.513075	#NAME?	#NAME?		#NAME?	#NAME?
Q96ND0	Protein FAM210A	FAM210A	-1.90691	-2.04106	-2.17225	-2.18304	-1.55833	-1.84429	-1.76924	-1.25272	-1.34105	-1.40152	-1.28963	-1.32154	#NAME?	0.642789		0.555031	#NAME?	#NAME?		#NAME?	#NAME?
P26440	Isovaleryl-CoA dehydrogenase, mitochondrial	IVD	2.08015	1.93452	1.55477	2.01764	2.46358	1.94792	2.51419	2.27119	2.74696	2.88451	3.20681	2.25725	#NAME?	0.610447		0.647055	#NAME?	#NAME?		#NAME?	#NAME?
Q00653	Nuclear factor NF-kappa-B p100 subunit	NFKB2	3.26466	-1.73059	-0.382283	-0.997878	2.34318	-6.54439	-2.44428	2.69931	3.21118	3.32736	-1.79688	3.19585	#NAME?	0.602019		2.03998	#NAME?	#NAME?		#NAME?	#NAME?
Q9NRY5	Protein FAM114A2	FAM114A2	-2.20611	-2.42318	-2.21226	-1.67038	-2.02051	-2.32929	-1.98217	-0.364743	-0.914646	-2.13192	-1.52363	-0.474859	#NAME?	0.0394788		0.911628	#NAME?	#NAME?		#NAME?	#NAME?
P50570	Dynamin-2	DNM2	2.03916	1.86688	3.49786	1.79127	0.97422	0.85973	2.52584	2.78655	3.3433	3.34617	2.56212	2.41243	#NAME?	0.0955238		0.991217	#NAME?	#NAME?		#NAME?	#NAME?
Q16762	Thiosulfate sulfurtransferase	TST	3.30833	3.03171	3.35282	2.97606	3.12458	3.0587	3.53036	3.26356	3.97451	4.02253	3.68966	4.54703	#NAME?	0.035482		0.695906	#NAME?	#NAME?		#NAME?	#NAME?
P04843	Dolichyl-diphosphooligosaccharide--protein glycosyltransferase subunit 1	RPN1	4.95722	4.63513	4.29904	4.6599	4.99748	4.79342	6.32769	4.97953	4.96771	5.32568	6.99407	5.41012	#NAME?	0.0232894		0.94377	#NAME?	#NAME?		#NAME?	#NAME?
P48059	LIM and senescent cell antigen-like-containing domain protein 1	LIMS1	-0.0243944	-1.11435	-0.386895	-0.741667	-0.757269	-0.799629	0.488396	-0.569941	0.196676	0.266177	0.392365	-0.331372	#NAME?	0.806071		0.711085	#NAME?	#NAME?		#NAME?	#NAME?
O75330	Hyaluronan mediated motility receptor	HMMR	-6.20138	-6.44806	-6.53569	-6.40529	-6.39037	-6.52513	-3.46535	-6.09933	-6.38206	-6.41444	-3.20125	-6.46212	#NAME?	3.07691e-05		1.08023	#NAME?	#NAME?		#NAME?	#NAME?
P27694	Replication protein A 70 kDa DNA-binding subunit	RPA1	2.95541	2.71893	2.67006	2.57774	1.13612	2.44905	3.48468	2.85232	3.29972	3.11932	3.31449	3.46516	#NAME?	0.0456738		0.838062	#NAME?	#NAME?		#NAME?	#NAME?
Q8NF37	Lysophosphatidylcholine acyltransferase 1	LPCAT1	-0.158887	0.0293122	-0.708502	0.0435288	-2.26165	-0.432533	0.300832	-0.0990832	0.367916	0.681287	0.63119	0.479284	#NAME?	0.0270991		0.975026	#NAME?	#NAME?		#NAME?	#NAME?
Q9NP73	Putative bifunctional UDP-N-acetylglucosamine transferase and deubiquitinase ALG13	ALG13	-3.80753	-2.98318	-2.31863	-2.31466	-2.45179	-2.72402	-1.92818	-2.51388	-1.99083	-1.16767	-1.6638	-2.38701	#NAME?	0.745025		0.824739	#NAME?	#NAME?		#NAME?	#NAME?
Q99798	Aconitate hydratase, mitochondrial	ACO2	1.83588	1.15459	2.56209	2.73905	2.46373	2.96806	4.75517	2.14942	4.82954	4.78516	4.73335	0.554895	#NAME?	0.0455215		1.34736	#NAME?	#NAME?		#NAME?	#NAME?
Q9NQC3	Reticulon-4	RTN4	3.94273	4.15734	4.05785	3.83545	3.60852	4.0524	5.00787	3.63872	4.67903	4.63925	5.11594	4.76925	#NAME?	0.0505738		0.699294	#NAME?	#NAME?		#NAME?	#NAME?
O43903	Growth arrest-specific protein 2	GAS2	0.291542	-0.731914	0.490305	0.703392	-0.210219	0.0621578	2.15342	-0.544206	1.04484	1.24228	1.63456	0.980008	#NAME?	0.242539		0.984274	#NAME?	#NAME?		#NAME?	#NAME?
Q9H6R0	ATP-dependent RNA helicase DHX33	DHX33	-2.15031	-2.53536	-3.2418	-2.59857	-3.23475	-2.00459	-0.115484	-2.62278	-2.50874	-2.27847	1.10098	-1.57285	#NAME?	0.0363909		1.29467	#NAME?	#NAME?		#NAME?	#NAME?
P16870	Carboxypeptidase E	CPE	0.113907	0.484823	-0.199342	0.48467	0.911835	1.247	2.07816	0.2841	0.993755	1.09192	2.44299	1.7449	#NAME?	0.378196		0.932155	#NAME?	#NAME?		#NAME?	#NAME?
O75146	Huntingtin-interacting protein 1-related protein	HIP1R	0.307701	0.070852	0.224635	0.425967	2.11043	0.552605	3.26657	0.34023	0.769591	0.53087	3.27234	1.17692	#NAME?	0.221637		0.944054	#NAME?	#NAME?		#NAME?	#NAME?
Q9NZU5	LIM and cysteine-rich domains protein 1	LMCD1	-2.23022	-5.61888	-3.50566	-4.44063	-3.31419	-4.24234	-3.23707	-1.48237	-2.50145	-2.37708	-4.10189	-2.58426	#NAME?	0.570905		1.17796	#NAME?	#NAME?		#NAME?	#NAME?
A6NCS6	Uncharacterized protein C2orf72	C2orf72	1.03562	0.695823	0.714063	1.00416	1.30549	0.990478	3.75617	0.891303	1.40452	1.14456	3.76586	1.87523	#NAME?	0.00160795		1.182	#NAME?	#NAME?		#NAME?	#NAME?
O75600	2-amino-3-ketobutyrate coenzyme A ligase, mitochondrial	GCAT	-2.81302	-3.34364	-2.15342	-3.30146	-2.83258	-4.34796	-2.41031	-1.8888	-3.0289	-1.83043	-1.80312	-2.48575	#NAME?	0.391055		0.890794	#NAME?	#NAME?		#NAME?	#NAME?
Q13315	Serine-protein kinase ATM	ATM	-2.82621	-4.72865	-3.31471	-3.75436	-3.27437	-3.84053	-0.828853	-4.58977	-2.47051	-2.56607	-2.60768	-1.7632	#NAME?	0.185408		1.15213	#NAME?	#NAME?		#NAME?	#NAME?
Q9BXJ8	Transmembrane protein 120A	TMEM120A	-1.19827	-0.433201	0.331446	0.0362093	-1.92671	-0.367675	0.763642	-1.83498	0.49112	0.215059	1.2045	0.651628	#NAME?	0.59424		0.84153	#NAME?	#NAME?		#NAME?	#NAME?
O15173	Membrane-associated progesterone receptor component 2	PGRMC2	2.90542	3.0867	2.95841	3.12305	3.33873	3.59246	3.731	2.85876	3.96749	4.15222	5.27885	4.55859	#NAME?	0.0246701		0.923691	#NAME?	#NAME?		#NAME?	#NAME?
Q96L92	Sorting nexin-27	SNX27	-0.6347	-2.75297	-2.25501	-2.92839	-2.41196	-2.95265	-1.42712	-1.03992	-0.450858	-0.466596	-2.89394	-1.18626	#NAME?	0.951649		1.0785	#NAME?	#NAME?		#NAME?	#NAME?
P18283	Glutathione peroxidase 2	GPX2	-3.38688	-2.58526	-3.88417	-2.69516	-3.69309	-4.36375	3.89082	-1.52863	-4.28146	-6.44717	4.593	-3.10215	#NAME?	0.000888706		2.28879	#NAME?	#NAME?		#NAME?	#NAME?
Q13017	Rho GTPase-activating protein 5	ARHGAP5	-3.70046	-3.15493	-6.34343	-3.67635	-3.09861	-6.47725	-2.90019	-3.04581	-3.04137	-2.53879	-3.75479	-3.35236	#NAME?	0.0107571		1.30295	#NAME?	#NAME?		#NAME?	#NAME?
O15516	Circadian locomoter output cycles protein kaput	CLOCK	-3.66039	-3.98248	-4.77584	-6.39898	-6.61755	-6.45973	-6.40912	-2.83915	-3.95285	-3.00248	-3.34343	-4.2497	#NAME?	0.966205		1.34971	#NAME?	#NAME?		#NAME?	#NAME?
Q9BVC6	Transmembrane protein 109	TMEM109	-0.900822	0.060406	-0.75609	0.0578988	0.581229	-1.28453	1.87911	-0.114987	0.936413	0.738376	1.63337	-0.847563	#NAME?	0.429924		1.07777	#NAME?	#NAME?		#NAME?	#NAME?
Q5BJD5	Transmembrane protein 41B	TMEM41B	0.655499	0.650491	0.04744	-0.288482	0.652767	0.334726	0.590051	0.934119	1.18056	1.23108	0.765038	1.09815	#NAME?	0.348543		0.624428	#NAME?	#NAME?		#NAME?	#NAME?
Q86W56	Poly(ADP-ribose) glycohydrolase	PARG	-4.88423	-4.96476	-5.26401	-5.08851	-4.84433	-4.67888	-0.724236	-5.88455	-3.19072	-6.42426	0.229795	-3.42493	#NAME?	2.7523e-05		1.71764	#NAME?	#NAME?		#NAME?	#NAME?
Q969S3	Zinc finger protein 622	ZNF622	2.03364	0.956895	0.519628	1.09263	2.24422	0.671877	1.78236	1.89477	2.33559	2.11642	2.50923	1.82281	#NAME?	0.0745976		0.823712	#NAME?	#NAME?		#NAME?	#NAME?
Q15334	Lethal(2) giant larvae protein homolog 1	LLGL1	-0.711263	-1.46263	-1.69532	-4.87315	-3.51647	-6.56426	-3.84797	-0.0472587	-1.62645	-0.6351	-2.04937	-0.828626	#NAME?	0.281558		1.63138	#NAME?	#NAME?		#NAME?	#NAME?
Q9Y697	Cysteine desulfurase, mitochondrial	NFS1	1.22759	1.62708	0.941164	1.20421	1.71293	1.1988	1.91788	1.27744	1.98928	2.12527	1.97582	2.01777	#NAME?	0.931933		0.565277	#NAME?	#NAME?		#NAME?	#NAME?
P13489	Ribonuclease inhibitor	RNH1	3.11079	2.56148	2.59544	2.49956	3.42025	2.27537	3.51786	2.87204	3.23234	3.4279	3.81034	3.66193	#NAME?	0.588788		0.676588	#NAME?	#NAME?		#NAME?	#NAME?
Q6NTF9	Rhomboid domain-containing protein 2	RHBDD2	-0.620163	-2.05921	-1.74826	-2.2475	-1.76892	-1.6919	-0.537678	-0.995947	-1.17878	-0.62778	-1.44914	-0.838847	#NAME?	0.296372		0.751295	#NAME?	#NAME?		#NAME?	#NAME?
Q8TEQ8	GPI ethanolamine phosphate transferase 3	PIGO	-2.00477	-2.31183	-3.39491	-2.33311	-2.86524	-4.03217	-1.82048	-1.57864	-2.36333	-0.917342	-2.84121	-1.72186	#NAME?	0.753423		0.949862	#NAME?	#NAME?		#NAME?	#NAME?
Q8IXM3	39S ribosomal protein L41, mitochondrial	MRPL41	-0.733004	-0.957693	-3.56771	-2.54211	-1.3294	-1.34181	-0.640682	-0.196519	-0.467964	-1.2451	-1.59227	0.093556	#NAME?	0.263875		1.07046	#NAME?	#NAME?		#NAME?	#NAME?
Q13595	Transformer-2 protein homolog alpha	TRA2A	1.71675	-0.532377	-0.054904	-0.340865	0.368061	-0.468449	0.800349	1.0078	1.2134	1.27624	0.998146	0.988682	#NAME?	0.00319162		0.932734	#NAME?	#NAME?		#NAME?	#NAME?
P41240	Tyrosine-protein kinase CSK	CSK	0.240104	0.196428	-0.74351	-0.556358	0.394453	-0.572429	4.51474	-0.0637201	-0.311865	0.164931	4.65448	-0.127883	#NAME?	0.00362398		1.64533	#NAME?	#NAME?		#NAME?	#NAME?
Q8WTR8	Netrin-5	NTN5	-6.08944	-6.34941	-6.50675	-6.47897	-6.60693	-3.5581	-3.25488	-3.30783	-6.44184	-3.85475	-4.36052	-6.37288	#NAME?	0.649225		1.33282	#NAME?	#NAME?		#NAME?	#NAME?
Q9NQ88	Fructose-2,6-bisphosphatase TIGAR	TIGAR	-1.00973	-1.46886	-1.9789	-1.40275	-0.7759	-1.67748	0.0230231	-0.484223	-0.352835	-0.267887	0.159693	-2.53267	#NAME?	0.0981785		0.809785	#NAME?	#NAME?		#NAME?	#NAME?
Q9Y6K0	Choline/ethanolaminephosphotransferase 1	CEPT1	0.706918	-1.2868	-1.4523	-1.19971	1.10529	-6.46677	-0.598837	-0.259076	0.830084	1.11669	0.314786	0.320204	#NAME?	0.00685009		1.71953	#NAME?	#NAME?		#NAME?	#NAME?
Q13308	Inactive tyrosine-protein kinase 7	PTK7	0.4656	-1.44749	-3.06281	-2.73086	-2.13296	-2.60638	-0.467802	-0.484513	-1.32439	-0.55066	-0.959578	-0.781517	#NAME?	0.0100824		1.15774	#NAME?	#NAME?		#NAME?	#NAME?
Q9H900	Protein zwilch homolog	ZWILCH	-6.17474	-4.33862	-3.8142	-3.29528	-6.39192	-2.21024	-4.76487	-2.01643	-3.30681	-3.44621	-2.13294	-2.39866	#NAME?	0.346683		1.35985	#NAME?	#NAME?		#NAME?	#NAME?
O60610	Protein diaphanous homolog 1	DIAPH1	-0.997531	-0.317896	-0.624733	-0.506102	-0.355876	-0.208623	-0.661578	1.37279	0.988155	0.835336	-0.640555	0.734329	#NAME?	0.0277428		0.939873	#NAME?	#NAME?		#NAME?	#NAME?
Q96BJ3	Axin interactor, dorsalization-associated protein	AIDA	-3.16871	-2.94583	-3.97809	-4.97314	-3.73625	-4.51019	-3.2639	-2.79817	-3.77363	-3.52061	-2.46725	-1.39075	#NAME?	0.812639		1.01632	#NAME?	#NAME?		#NAME?	#NAME?
Q13501	Sequestosome-1	SQSTM1	1.01897	1.38773	1.61211	0.931926	0.425618	0.644761	1.05459	1.2656	2.27556	2.19287	2.1664	1.62434	#NAME?	0.721973		0.759708	#NAME?	#NAME?		#NAME?	#NAME?
Q8NBF6	Late secretory pathway protein AVL9 homolog	AVL9	-3.59352	-5.33264	-6.27833	-4.063	-2.88666	-6.44312	-0.243795	-5.47998	-6.2427	-4.04213	-0.0320856	-2.12581	#NAME?	0.224428		1.73846	#NAME?	#NAME?		#NAME?	#NAME?
Q8TES7	Fas-binding factor 1	FBF1	2.83306	2.53103	1.9419	2.24676	2.25235	1.89564	2.70077	2.94098	2.96575	2.76927	2.99149	2.65592	#NAME?	0.0737027		0.553909	#NAME?	#NAME?		#NAME?	#NAME?
Q5ST30	Valine--tRNA ligase, mitochondrial	VARS2	-0.57326	-0.831978	-1.3906	-1.36445	-1.48794	-0.603367	-0.363982	-0.380668	-0.432282	-0.446642	-0.382203	-0.321751	#NAME?	0.000159917		0.654011	#NAME?	#NAME?		#NAME?	#NAME?
O43826	Glucose-6-phosphate exchanger SLC37A4	SLC37A4	-1.5095	-2.10422	0.535044	-0.66839	-0.319587	-2.67041	0.311861	-0.0824035	0.249138	0.140125	-0.922485	-0.0251585	#NAME?	0.0525966		1.06802	#NAME?	#NAME?		#NAME?	#NAME?
Q9UHQ9	NADH-cytochrome b5 reductase 1	CYB5R1	0.528975	0.284098	-1.56016	-0.198297	0.950778	-0.114408	0.658535	0.689609	1.16066	0.763127	1.22804	0.984572	#NAME?	0.0152815		0.932261	#NAME?	#NAME?		#NAME?	#NAME?
P07384	Calpain-1 catalytic subunit	CAPN1	1.77094	0.029926	0.86759	0.872849	0.627978	0.97621	2.95105	1.58659	0.677248	1.08666	3.2015	1.70277	#NAME?	0.226819		1.01006	#NAME?	#NAME?		#NAME?	#NAME?
Q6IA69	Glutamine-dependent NAD(+) synthetase	NADSYN1	-1.40619	-2.22288	2.44504	-2.37476	-2.05546	2.33324	1.56302	-1.13225	1.60163	1.59224	1.41429	1.35855	#NAME?	0.123646		1.61308	#NAME?	#NAME?		#NAME?	#NAME?
Q92834	X-linked retinitis pigmentosa GTPase regulator	RPGR	-2.1567	-2.73874	-2.51951	-2.12293	-1.57153	-1.88242	-1.67034	-2.00353	-1.31365	-1.78615	-1.14122	-0.819455	#NAME?	0.917831		0.709582	#NAME?	#NAME?		#NAME?	#NAME?
P55036	26S proteasome non-ATPase regulatory subunit 4	PSMD4	2.37827	2.79709	2.78052	3.32644	2.2634	2.57028	4.02758	3.24785	3.06028	3.03338	4.41545	2.97886	#NAME?	0.321386		0.774565	#NAME?	#NAME?		#NAME?	#NAME?
Q68CK6	Acyl-coenzyme A synthetase ACSM2B, mitochondrial	ACSM2B	-2.42222	-4.96194	-3.66419	-5.47814	-6.92834	-4.01879	-2.31402	-2.0231	-3.45993	-3.1486	-3.16825	-5.27258	#NAME?	0.505229		1.34786	#NAME?	#NAME?		#NAME?	#NAME?
Q9UJX6	Anaphase-promoting complex subunit 2	ANAPC2	-4.08775	-3.79388	-2.31619	-6.48035	-6.5881	-5.01014	-3.0567	-2.89419	-2.11723	-3.14176	-7.04915	-2.57475	#NAME?	0.866723		1.24044	#NAME?	#NAME?		#NAME?	#NAME?
B7ZC32	Kinesin-like protein KIF28P	KIF28P	-5.64223	-5.12815	-6.35449	-4.51988	-6.38568	-6.51646	-6.50455	1.45437	0.775065	0.529269	-6.88969	-6.51534	#NAME?	0.00266325		2.89933	#NAME?	#NAME?		#NAME?	#NAME?
Q14249	Endonuclease G, mitochondrial	ENDOG	-1.88395	-2.64415	-2.16132	-1.96078	-2.54561	-2.61025	-2.29078	0.531998	-0.126813	0.556704	-2.54802	-2.52219	#NAME?	0.00486964		1.23449	#NAME?	#NAME?		#NAME?	#NAME?
Q9GZR2	RNA exonuclease 4	REXO4	-0.426938	-0.87363	0.785764	0.0379523	-0.542194	-0.664619	1.05223	-0.399416	2.64153	0.19755	0.947816	0.116764	#NAME?	0.235082		1.04002	#NAME?	#NAME?		#NAME?	#NAME?
P19174	1-phosphatidylinositol 4,5-bisphosphate phosphodiesterase gamma-1	PLCG1	2.39604	-1.11162	-0.411078	-1.12487	0.29207	-2.22016	-2.11819	2.49479	2.29067	2.58718	-1.54792	2.48691	#NAME?	0.475907		1.39551	#NAME?	#NAME?		#NAME?	#NAME?
O15118	NPC intracellular cholesterol transporter 1	NPC1	1.30889	-0.199586	0.19568	0.180492	1.1774	0.130479	1.87667	1.51434	0.53902	0.885697	1.38997	1.43475	#NAME?	0.58572		0.807846	#NAME?	#NAME?		#NAME?	#NAME?
A6NJ78	Probable methyltransferase-like protein 15	METTL15	-2.28507	-1.80926	-2.15307	-1.50621	-1.23534	-1.50807	-0.781204	-1.26714	-1.44549	-0.896681	-0.594353	-1.50385	#NAME?	0.859433		0.668051	#NAME?	#NAME?		#NAME?	#NAME?
P49759	Dual specificity protein kinase CLK1	CLK1	-1.69384	-1.39933	-0.913355	-0.993148	-1.10449	-1.83572	-1.24492	-1.37056	-0.614624	-0.393015	0.640951	0.182393	#NAME?	0.13883		0.856684	#NAME?	#NAME?		#NAME?	#NAME?
P02649	Apolipoprotein E	APOE	4.44383	3.92833	3.41976	4.1664	3.95569	4.03441	4.19259	4.11462	4.94499	4.59217	5.5318	4.8362	#NAME?	0.352468		0.710657	#NAME?	#NAME?		#NAME?	#NAME?
Q9Y672	Dolichyl pyrophosphate Man9GlcNAc2 alpha-1,3-glucosyltransferase	ALG6	-1.29944	-1.73064	-1.54742	-2.20308	-1.81258	-2.47628	-1.7806	-0.633315	-0.867159	-0.313962	-2.12595	-0.0438944	#NAME?	0.179687		0.884095	#NAME?	#NAME?		#NAME?	#NAME?
Q92503	SEC14-like protein 1	SEC14L1	-2.33277	-5.34113	-4.79807	-6.40967	-3.99625	-4.76137	-0.303673	-3.31124	-4.47916	-6.29031	-1.05128	-2.78042	#NAME?	0.321899		1.57053	#NAME?	#NAME?		#NAME?	#NAME?
Q9Y619	Mitochondrial ornithine transporter 1	SLC25A15	1.68326	1.56627	1.73289	2.04437	1.65701	2.48843	2.78658	1.84286	2.268	2.4467	3.75229	2.71103	#NAME?	0.20167		0.772538	#NAME?	#NAME?		#NAME?	#NAME?
P51553	Isocitrate dehydrogenase [NAD] subunit gamma, mitochondrial	IDH3G	-0.598662	0.245088	0.735556	0.0594397	-2.01119	-1.24715	1.2244	-0.478148	2.19226	-0.497973	2.706	-0.375832	#NAME?	0.466801		1.2646	#NAME?	#NAME?		#NAME?	#NAME?
Q6NZY4	Zinc finger CCHC domain-containing protein 8	ZCCHC8	0.564651	-0.423376	-0.27197	-1.05154	-6.44408	-2.26886	4.85131	0.257837	-0.442375	-0.523922	-0.423994	-1.21174	#NAME?	0.781499		2.06705	#NAME?	#NAME?		#NAME?	#NAME?
Q9BRS2	Serine/threonine-protein kinase RIO1	RIOK1	-3.14771	-3.3429	-4.05818	-3.40648	-4.1332	-4.35811	-2.62083	-2.98069	-2.38454	-3.0093	-2.96951	-3.89927	#NAME?	0.952819		0.763738	#NAME?	#NAME?		#NAME?	#NAME?
O00629	Importin subunit alpha-3	KPNA4	-2.35075	-1.21699	-2.33208	-2.65415	-6.39815	-1.54569	0.669134	-1.28365	-1.24336	-0.995118	-2.73499	-2.33208	#NAME?	0.345778		1.42962	#NAME?	#NAME?		#NAME?	#NAME?
Q92600	CCR4-NOT transcription complex subunit 9	CNOT9	-1.39812	-0.458498	-0.127976	-0.626834	-1.6778	-0.596984	0.860528	-0.179258	0.416344	-0.017598	-1.04998	0.174827	#NAME?	0.865177		0.848513	#NAME?	#NAME?		#NAME?	#NAME?
Q14C86	GTPase-activating protein and VPS9 domain-containing protein 1	GAPVD1	-0.102254	0.637886	1.52729	1.27057	2.10509	1.71849	2.44017	1.04512	3.7221	0.768056	1.81942	5.06625	#NAME?	0.138089		1.28401	#NAME?	#NAME?		#NAME?	#NAME?
P32929	Cystathionine gamma-lyase	CTH	-1.39437	-2.27279	-1.04263	-1.14101	-0.668939	-1.5718	-1.06804	-0.562851	1.22213	1.18784	-2.50718	1.07855	#NAME?	0.041634		1.24033	#NAME?	#NAME?		#NAME?	#NAME?
O00566	U3 small nucleolar ribonucleoprotein protein MPP10	MPHOSPH10	0.991073	-0.193159	-0.0895113	-0.285086	1.05087	-0.232532	1.00346	1.11841	0.939142	0.877335	0.910101	1.06484	#NAME?	0.000705651		0.778606	#NAME?	#NAME?		#NAME?	#NAME?
O60941	Dystrobrevin beta	DTNB	-1.12344	0.915176	1.80563	-6.2469	-2.43287	1.30435	1.58737	-1.29352	1.36709	0.71861	1.19133	1.25828	#NAME?	0.037929		1.76787	#NAME?	#NAME?		#NAME?	#NAME?
Q10472	Polypeptide N-acetylgalactosaminyltransferase 1	GALNT1	-1.68769	-2.4082	-3.8474	-2.40049	-5.11017	-3.33167	-1.78581	-1.37321	-2.05076	-1.84551	-2.29191	-2.97498	#NAME?	0.0970696		1.07724	#NAME?	#NAME?		#NAME?	#NAME?
O75818	Ribonuclease P protein subunit p40	RPP40	0.105168	-2.72614	-4.72944	-4.86415	-6.49371	-4.48246	-1.30507	-2.26472	-3.62905	-3.97566	-0.544672	-2.05586	#NAME?	0.253516		1.56929	#NAME?	#NAME?		#NAME?	#NAME?
P55084	Trifunctional enzyme subunit beta, mitochondrial	HADHB	4.6799	4.52047	4.85168	4.87829	4.5596	4.82165	5.48442	4.77792	5.1394	5.17607	5.75653	5.14544	#NAME?	0.114819		0.528032	#NAME?	#NAME?		#NAME?	#NAME?
Q9P0J0	NADH dehydrogenase [ubiquinone] 1 alpha subcomplex subunit 13	NDUFA13	6.19415	6.09011	5.79828	6.05907	3.12142	5.97642	7.08938	6.53865	7.03341	6.76969	6.437	5.68561	#NAME?	0.0886499		1.05238	#NAME?	#NAME?		#NAME?	#NAME?
Q8TEX9	Importin-4	IPO4	1.30962	0.293459	-0.159022	-0.0516031	1.89146	-0.145822	-0.238829	1.69727	3.09241	2.92549	0.238377	2.72985	#NAME?	0.292325		1.21775	#NAME?	#NAME?		#NAME?	#NAME?
Q6DKI1	60S ribosomal protein L7-like 1	RPL7L1	-0.192031	0.128179	0.129412	0.236999	0.255625	0.177535	1.71386	0.234018	0.710131	0.780695	0.707401	0.63932	#NAME?	0.0306151		0.674951	#NAME?	#NAME?		#NAME?	#NAME?
P30536	Translocator protein	TSPO	-1.68107	-1.93212	-2.37394	-2.13545	-2.23146	-2.29104	-0.82844	-0.983941	-1.01387	-1.39069	-1.3269	-2.59221	#NAME?	0.0670091		0.751506	#NAME?	#NAME?		#NAME?	#NAME?
P13640	Metallothionein-1G	MT1G	-6.09415	-6.40732	-2.29211	-2.61519	-6.62175	-1.73672	-1.46995	-1.12629	-1.78783	-1.86105	-5.97938	-6.49413	#NAME?	0.905528		1.17477	#NAME?	#NAME?		#NAME?	#NAME?
Q9Y394	Dehydrogenase/reductase SDR family member 7	DHRS7	-0.970756	-0.614745	-0.553991	-1.03393	-1.66404	-0.826708	1.21195	-1.28193	-0.488676	-0.45119	2.44584	-0.187816	#NAME?	0.0176053		1.15206	#NAME?	#NAME?		#NAME?	#NAME?
Q9HCC0	Methylcrotonoyl-CoA carboxylase beta chain, mitochondrial	MCCC2	2.48782	2.52076	1.739	1.75565	1.63029	1.21811	2.6002	2.52196	2.92669	2.33413	3.48215	2.01897	#NAME?	0.980979		0.755412	#NAME?	#NAME?		#NAME?	#NAME?
P33176	Kinesin-1 heavy chain	KIF5B	1.92322	2.14839	2.51668	2.35287	2.67921	2.28742	2.93567	1.84283	3.25852	3.504	3.34789	3.50456	#NAME?	0.0805093		0.747612	#NAME?	#NAME?		#NAME?	#NAME?
O60779	Thiamine transporter 1	SLC19A2	-2.43578	-2.14596	-2.15028	-1.73853	-6.57467	-2.406	-1.10666	-1.90927	-1.8934	-2.1383	-1.32617	-1.06183	#NAME?	0.00947817		1.33593	#NAME?	#NAME?		#NAME?	#NAME?
Q7Z407	CUB and sushi domain-containing protein 3	CSMD3	-0.723841	-1.07079	-1.1875	-1.44399	-1.02139	-1.74729	-0.299145	-0.585744	-0.518061	-0.406957	-0.0625268	-1.35848	#NAME?	0.647978		0.660648	#NAME?	#NAME?		#NAME?	#NAME?
Q14139	Ubiquitin conjugation factor E4 A	UBE4A	-2.13308	-0.775438	-1.08331	-0.686321	-2.62822	-0.548975	0.0586763	-1.82701	-0.334666	0.81814	0.268875	-0.680335	#NAME?	0.901751		1.0265	#NAME?	#NAME?		#NAME?	#NAME?
Q8N4V1	Membrane magnesium transporter 1	MMGT1	-0.304955	-0.392749	-0.213701	-0.118289	-0.408089	-0.6166	0.610107	-0.344113	0.0508159	0.226509	0.792819	0.0850411	#NAME?	0.0813387		0.579261	#NAME?	#NAME?		#NAME?	#NAME?
Q86WJ1	Chromodomain-helicase-DNA-binding protein 1-like	CHD1L	-2.24075	-1.98584	-2.2862	-1.36612	-1.79664	-3.27806	-0.228293	-1.959	-1.54449	-1.59818	-1.54811	-1.61551	#NAME?	0.889611		0.743337	#NAME?	#NAME?		#NAME?	#NAME?
Q5SY16	Polynucleotide 5'-hydroxyl-kinase NOL9	NOL9	-1.44081	0.19197	-0.434548	-0.59804	-1.48794	-0.303348	0.962848	-1.41919	0.703167	0.179343	1.82063	-0.100109	#NAME?	0.29324		1.03657	#NAME?	#NAME?		#NAME?	#NAME?
Q96QZ7	Membrane-associated guanylate kinase, WW and PDZ domain-containing protein 1	MAGI1	-3.30574	-3.61504	-4.05108	-2.83136	-2.66187	-4.08383	1.40066	-3.32962	-2.98708	-2.02241	1.33317	-5.13969	#NAME?	0.00552485		1.63399	#NAME?	#NAME?		#NAME?	#NAME?
Q8WUY8	N-acetyltransferase 14	NAT14	-3.21719	-6.38462	-2.47022	-6.44386	-6.56394	-6.48723	-6.54208	-3.01971	-6.32705	-2.5146	-2.50706	-2.78149	#NAME?	0.957586		1.31251	#NAME?	#NAME?		#NAME?	#NAME?
Q9UN76	Sodium- and chloride-dependent neutral and basic amino acid transporter B(0+)	SLC6A14	-2.34704	-2.55599	-1.69915	-6.33928	-2.93438	-6.64859	-4.02109	-2.72891	-2.20362	-1.58359	-1.64805	-1.57181	#NAME?	0.0998334		1.46123	#NAME?	#NAME?		#NAME?	#NAME?
A0PK00	Transmembrane protein 120B	TMEM120B	-6.16686	-3.4629	-6.43432	-3.29843	-4.63191	-6.54827	-1.90057	-2.91199	-1.38021	-0.726861	-6.90335	-6.57449	#NAME?	0.223866		1.69087	#NAME?	#NAME?		#NAME?	#NAME?
Q16891	MICOS complex subunit MIC60	IMMT	2.89246	3.09042	2.58323	3.12598	3.24088	2.54714	3.16934	3.17534	3.44392	3.55143	3.82228	3.50724	#NAME?	0.723505		0.531575	#NAME?	#NAME?		#NAME?	#NAME?
Q8N9F7	Lysophospholipase D GDPD1	GDPD1	-1.05769	-1.34207	-1.97552	-2.12397	-3.20396	-1.63138	-1.24635	-0.830563	-0.698289	-0.716837	-0.569624	-2.84928	#NAME?	0.775099		0.737275	#NAME?	#NAME?		#NAME?	#NAME?
Q92563	Testican-2	SPOCK2	-0.322432	0.410728	-0.0250881	0.126279	-1.17885	0.632893	1.29865	-0.246284	0.399318	1.35239	1.46073	0.568795	#NAME?	0.906405		0.865013	#NAME?	#NAME?		#NAME?	#NAME?
Q9H5Q4	Dimethyladenosine transferase 2, mitochondrial	TFB2M	-0.154287	-0.0704225	-0.908121	-1.07811	-0.710413	-1.52582	0.108888	-0.520253	-0.234178	0.0173013	0.226743	0.0965973	#NAME?	0.150676		0.690379	#NAME?	#NAME?		#NAME?	#NAME?
Q9NQB0	Transcription factor 7-like 2	TCF7L2	-5.03559	-2.95491	-2.51793	-2.49146	-1.50196	-2.77485	-6.36565	1.1678	1.50125	1.22845	-6.93679	1.02095	#NAME?	0.0159632		1.48212	#NAME?	#NAME?		#NAME?	#NAME?
P21589	5'-nucleotidase	NT5E	1.53603	0.850172	0.93921	0.857173	1.96618	1.21169	1.65881	1.67915	1.66605	1.9306	1.84148	2.31007	#NAME?	0.23256		0.620951	#NAME?	#NAME?		#NAME?	#NAME?
Q0PNE2	Elongator complex protein 6	ELP6	0.301578	-1.51769	-1.7043	-0.897772	-1.53952	-4.6416	-2.62178	0.667894	1.19511	1.38259	-4.59725	0.831499	#NAME?	0.379657		1.14289	#NAME?	#NAME?		#NAME?	#NAME?
Q14839	Chromodomain-helicase-DNA-binding protein 4	CHD4	1.27622	1.35703	2.5246	-0.473206	1.43401	-1.18567	0.99893	1.22025	3.48625	3.42815	1.16971	3.46584	#NAME?	0.875377		1.47269	#NAME?	#NAME?		#NAME?	#NAME?
Q8ND24	RING finger protein 214	RNF214	-4.31477	-2.10513	-6.31838	-5.00918	-3.86153	-6.63659	-2.08414	-3.02049	-2.74737	-4.26259	-3.75801	-4.60759	#NAME?	0.248557		1.29423	#NAME?	#NAME?		#NAME?	#NAME?
Q9UQN3	Charged multivesicular body protein 2b	CHMP2B	0.397833	0.457731	-0.195701	0.219418	0.626049	0.388608	1.2647	0.678186	0.724521	0.726	1.13638	0.585391	#NAME?	0.968087		0.536874	#NAME?	#NAME?		#NAME?	#NAME?
P50991	T-complex protein 1 subunit delta	CCT4	4.28467	3.9589	3.54706	3.8233	4.66289	4.33729	4.46939	4.4927	4.91936	5.01871	4.43171	4.8528	#NAME?	0.364815		0.595093	#NAME?	#NAME?		#NAME?	#NAME?
Q96P48	Arf-GAP with Rho-GAP domain, ANK repeat and PH domain-containing protein 1	ARAP1	-1.43871	-3.70861	-4.4443	-4.38502	-3.08945	-2.20738	-3.96031	-1.82972	-1.62972	-1.5009	-2.49509	-0.842633	#NAME?	0.810213		1.16919	#NAME?	#NAME?		#NAME?	#NAME?
Q9NRK6	ATP-binding cassette sub-family B member 10, mitochondrial	ABCB10	-1.20416	-1.20348	-1.19805	-1.00062	-0.904541	-0.481352	1.17527	-1.09083	-0.801391	-0.141339	1.63571	-0.65343	#NAME?	0.00877816		1.01937	#NAME?	#NAME?		#NAME?	#NAME?
Q8N7Z5	Ankyrin repeat domain-containing protein 31	ANKRD31	-0.295736	-6.28754	-6.2587	-6.34904	-0.197945	-6.54421	-2.5612	0.926575	0.99535	0.998048	-6.85381	-6.40647	#NAME?	0.72268		2.17194	#NAME?	#NAME?		#NAME?	#NAME?
Q9NWS8	Required for meiotic nuclear division protein 1 homolog	RMND1	-0.55841	-0.888086	-1.07322	-0.44193	-0.971261	-0.585248	1.6802	-0.795511	0.205309	-0.319676	1.76725	-0.813531	#NAME?	0.00465653		1.04037	#NAME?	#NAME?		#NAME?	#NAME?
Q8IVL6	Prolyl 3-hydroxylase 3	P3H3	-0.343267	-0.675448	-0.487476	-0.637397	-0.616273	-2.83739	1.49441	-1.04634	-0.925321	-0.536942	3.0188	-0.0293964	#NAME?	0.264221		1.26208	#NAME?	#NAME?		#NAME?	#NAME?
O14828	Secretory carrier-associated membrane protein 3	SCAMP3	1.69678	1.82697	2.39042	2.56144	1.72708	2.27665	2.0452	1.64127	3.31172	3.17459	3.58065	4.10829	#NAME?	0.0639962		0.897064	#NAME?	#NAME?		#NAME?	#NAME?
P34096	Ribonuclease 4	RNASE4	-0.230591	-0.746303	-2.0409	-2.03304	-3.04697	-1.05707	-1.21542	-1.01365	-0.419128	-0.106927	-0.683712	0.0424129	#NAME?	0.134581		0.959741	#NAME?	#NAME?		#NAME?	#NAME?
Q9BTX3	Transmembrane protein 208	TMEM208	-0.682645	-1.07967	-1.64485	-2.19548	-1.13798	-1.43799	-1.69525	-0.33888	0.274028	-0.0808201	-0.971369	-0.423803	#NAME?	0.540463		0.823752	#NAME?	#NAME?		#NAME?	#NAME?
O75886	Signal transducing adapter molecule 2	STAM2	-2.32778	-2.84333	-2.83513	-3.71293	-2.96715	-3.35276	-2.14572	-0.824636	-1.6522	-1.25631	-6.77905	-1.08558	#NAME?	0.00399861		0.715929	#NAME?	#NAME?		#NAME?	#NAME?
Q12765	Secernin-1	SCRN1	2.0709	1.42298	1.95878	1.82477	1.13195	2.41796	2.13361	1.86535	2.53377	2.54144	2.81742	3.10558	#NAME?	0.949308		0.694971	#NAME?	#NAME?		#NAME?	#NAME?
P15924	Desmoplakin	DSP	5.39378	4.41744	4.25939	4.53818	5.41139	4.90036	6.28493	5.15434	4.77407	4.83657	6.86916	6.4265	#NAME?	0.212709		0.904172	#NAME?	#NAME?		#NAME?	#NAME?
Q969L2	Protein MAL2	MAL2	0.748913	-0.225299	-0.00705406	0.125519	0.214449	0.0419121	0.456093	0.495028	0.668447	0.643373	1.32888	0.75694	#NAME?	0.935003		0.575053	#NAME?	#NAME?		#NAME?	#NAME?
P40939	Trifunctional enzyme subunit alpha, mitochondrial	HADHA	4.7724	4.57017	4.63274	4.72167	5.28361	4.86084	5.72852	4.73893	5.37952	5.07811	6.09396	5.61292	#NAME?	0.186922		0.631756	#NAME?	#NAME?		#NAME?	#NAME?
O75635	Serpin B7	SERPINB7	-6.04907	-5.0191	-6.48881	-6.3795	-6.41576	-4.89078	-1.84422	-6.07417	-6.42493	-6.44437	-2.31855	-2.36421	#NAME?	0.0257425		1.62876	#NAME?	#NAME?		#NAME?	#NAME?
P49888	Estrogen sulfotransferase	SULT1E1	-3.26388	-3.42139	-3.62252	-5.19003	-2.68835	-6.54777	-2.5923	-3.54635	-3.04509	-2.54872	-3.78346	-2.44831	#NAME?	0.0580284		1.12828	#NAME?	#NAME?		#NAME?	#NAME?
Q9Y2V2	Calcium-regulated heat-stable protein 1	CARHSP1	1.56581	1.77999	1.89545	1.79224	1.93418	1.83189	3.02294	2.06867	2.15153	1.92992	2.1224	2.14645	#NAME?	0.0292235		0.440389	#NAME?	#NAME?		#NAME?	#NAME?
Q9Y512	Sorting and assembly machinery component 50 homolog	SAMM50	2.2789	2.70163	3.14079	3.19949	3.5218	3.86434	3.91476	2.51511	4.16172	4.05971	4.54464	4.64721	#NAME?	0.519405		0.856032	#NAME?	#NAME?		#NAME?	#NAME?
Q96RU3	Formin-binding protein 1	FNBP1	-6.09309	-6.19533	-6.2818	-6.32037	-6.39484	-6.53859	-6.32725	-4.33556	-4.70688	-6.24472	-2.7612	-6.49746	#NAME?	0.000131817		1.15849	#NAME?	#NAME?		#NAME?	#NAME?
Q8NHV4	Protein NEDD1	NEDD1	-4.8038	-4.14956	-3.60676	-3.62809	-6.40113	-6.45051	-1.669	-4.35223	-2.98804	-3.8667	-1.25721	-6.46626	#NAME?	0.420499		1.40673	#NAME?	#NAME?		#NAME?	#NAME?
Q6ZMK1	Cysteine and histidine-rich protein 1	CYHR1	-2.79142	-6.33488	-6.44679	-6.30975	-6.52666	-6.44909	-6.37591	-2.89869	-2.60369	-3.24894	-6.86358	-4.34773	#NAME?	0.651877		1.42001	#NAME?	#NAME?		#NAME?	#NAME?
Q96KM6	Zinc finger protein 512B	ZNF512B	-3.56427	-4.23529	-2.8412	-3.11522	-5.48324	-4.65693	-0.2005	-3.14006	-3.23574	-4.6799	1.01389	-4.69661	#NAME?	0.0808958		1.49287	#NAME?	#NAME?		#NAME?	#NAME?
Q9NWY4	Histone PARylation factor 1	HPF1	-0.0564892	-0.999014	-1.86702	-1.7878	-0.605403	-1.21867	1.54934	-1.02418	-0.707265	-0.660001	1.9258	-1.07677	#NAME?	0.16716		1.09022	#NAME?	#NAME?		#NAME?	#NAME?
O95249	Golgi SNAP receptor complex member 1	GOSR1	-1.3534	-2.79634	-3.60223	-2.96865	-4.14377	-2.31691	-0.0148162	-1.37575	-1.59937	-3.63989	0.391166	-3.34613	#NAME?	0.271344		1.26608	#NAME?	#NAME?		#NAME?	#NAME?
P22309	UDP-glucuronosyltransferase 1-1	UGT1A1	2.40127	-0.297755	-6.29224	-1.40717	0.269569	-6.39321	-6.46137	2.33966	2.79099	2.99923	-7.02782	3.31239	#NAME?	0.502099		1.6121	#NAME?	#NAME?		#NAME?	#NAME?
O75462	Cytokine receptor-like factor 1	CRLF1	0.803613	-0.7173	1.06789	-0.584433	1.72211	-0.244193	1.85139	0.583274	0.909039	0.96812	2.471	1.13445	#NAME?	0.463168		0.978265	#NAME?	#NAME?		#NAME?	#NAME?
P37802	Transgelin-2	TAGLN2	-0.595642	-1.82693	-3.28011	-1.70963	-1.19888	-2.47359	-0.44427	-1.24683	-1.13674	-0.899748	-0.660548	-1.22091	#NAME?	0.0366516		0.912625	#NAME?	#NAME?		#NAME?	#NAME?
Q53S58	Transmembrane protein 177	TMEM177	-0.666687	-2.13777	-1.78525	-1.08668	-1.60882	-2.2923	-1.18423	-0.623381	-0.351231	-0.0518312	-2.12251	0.104844	#NAME?	0.541244		0.891529	#NAME?	#NAME?		#NAME?	#NAME?
P62942	Peptidyl-prolyl cis-trans isomerase FKBP1A	FKBP1A	4.02102	3.24511	2.91546	3.4779	-0.23532	3.01415	3.33219	4.16175	4.33943	4.1168	0.899368	4.18267	#NAME?	0.781535		0.765647	#NAME?	#NAME?		#NAME?	#NAME?
Q93088	Betaine--homocysteine S-methyltransferase 1	BHMT	-0.452536	-0.97993	-0.670687	-0.667128	-1.49364	-0.93344	0.82342	1.39512	-0.281484	2.43593	-1.83725	-0.659763	#NAME?	0.00654525		1.17889	#NAME?	#NAME?		#NAME?	#NAME?
Q96I99	Succinate--CoA ligase [GDP-forming] subunit beta, mitochondrial	SUCLG2	4.11957	3.91449	3.82602	3.81968	4.42157	3.98662	4.58687	4.32457	4.50073	4.75129	5.52193	4.11706	#NAME?	0.122336		0.619083	#NAME?	#NAME?		#NAME?	#NAME?
P16401	Histone H1.5	HIST1H1B	3.996	3.7106	3.56204	3.65586	3.73184	3.71979	4.04513	4.09977	4.05439	3.85189	4.855	4.06485	#NAME?	0.0747846		0.432484	#NAME?	#NAME?		#NAME?	#NAME?
Q15072	Zinc finger protein OZF	ZNF146	-6.24473	-6.35979	-6.41107	-6.48258	-6.49144	-6.63589	-5.2012	-5.38822	-6.1728	-5.12097	-7.06655	-3.70866	#NAME?	0.000235946		0.994516	#NAME?	#NAME?		#NAME?	#NAME?
Q14746	Conserved oligomeric Golgi complex subunit 2	COG2	-0.742634	-0.591838	-1.06387	-1.66936	-2.55255	-1.4326	-0.294568	-0.698256	-0.629803	-0.659695	-0.296721	-0.758173	#NAME?	0.0160241		0.785937	#NAME?	#NAME?		#NAME?	#NAME?
Q08170	Serine/arginine-rich splicing factor 4	SRSF4	4.04558	3.65141	3.51953	3.05062	3.76714	3.76155	4.22275	3.96452	4.0968	3.92915	4.59749	4.18644	#NAME?	0.493829		0.533553	#NAME?	#NAME?		#NAME?	#NAME?
P58004	Sestrin-2	SESN2	-3.28868	-6.45138	-4.40741	-5.76747	-6.49358	-6.51883	-6.48882	-3.85465	-2.46159	-2.472	-6.14442	-3.31031	#NAME?	0.553871		1.36593	#NAME?	#NAME?		#NAME?	#NAME?
Q5SRI9	Glycoprotein endo-alpha-1,2-mannosidase	MANEA	-6.1722	-6.38134	-6.25916	-6.2965	-4.25314	-6.37186	-4.33928	-3.89338	-6.41247	-6.35576	-3.82552	-3.65564	#NAME?	0.366572		1.20869	#NAME?	#NAME?		#NAME?	#NAME?
P08240	Signal recognition particle receptor subunit alpha	SRPRA	1.36587	1.33255	1.5988	1.4985	0.395457	-0.836387	3.40033	1.24771	1.15335	1.46776	3.76948	1.55469	#NAME?	0.665216		1.20642	#NAME?	#NAME?		#NAME?	#NAME?
P78556	C-C motif chemokine 20	CCL20	2.41394	1.75224	1.62838	1.45842	-1.12135	1.64754	2.76209	1.94457	2.07911	1.55549	3.92623	2.03273	#NAME?	0.437556		1.08684	#NAME?	#NAME?		#NAME?	#NAME?
Q9Y3S1	Serine/threonine-protein kinase WNK2	WNK2	-6.05153	-6.18483	-6.26288	-6.44989	-6.38267	-6.55209	-1.90491	-6.11867	-6.35144	-6.29628	-2.54223	-6.48384	#NAME?	5.06519e-05		1.36442	#NAME?	#NAME?		#NAME?	#NAME?
Q8IVU3	Probable E3 ubiquitin-protein ligase HERC6	HERC6	2.15378	1.73638	1.80017	1.16454	1.34418	0.877486	2.04058	2.00575	1.90039	1.64879	3.38952	2.64228	#NAME?	0.513305		0.758459	#NAME?	#NAME?		#NAME?	#NAME?
P82932	28S ribosomal protein S6, mitochondrial	MRPS6	-0.496827	-1.32211	-2.08769	-2.04689	-2.57568	-3.51978	-1.3031	-0.611145	-0.818679	-0.850912	-1.26099	-1.5242	#NAME?	0.0332		0.946659	#NAME?	#NAME?		#NAME?	#NAME?
P48047	ATP synthase subunit O, mitochondrial	ATP5PO	4.33533	4.25709	4.61258	4.39461	4.67479	4.4805	5.21492	4.57698	5.02671	4.72486	6.05652	5.10464	#NAME?	0.0230094		0.658289	#NAME?	#NAME?		#NAME?	#NAME?
Q8IW45	ATP-dependent (S)-NAD(P)H-hydrate dehydratase	NAXD	-2.00085	-2.1757	-1.8551	-1.30469	-1.45748	-1.25263	2.50183	-1.81166	-0.39751	-1.63938	2.88567	-2.78175	#NAME?	0.00114971		1.46727	#NAME?	#NAME?		#NAME?	#NAME?
Q8TEK3	Histone-lysine N-methyltransferase, H3 lysine-79 specific	DOT1L	-4.29923	-6.2371	-6.44549	-6.24938	-6.41238	-3.14918	-6.43825	-0.0475179	-6.37231	0.34937	-6.78919	-2.88683	#NAME?	0.0825565		1.76801	#NAME?	#NAME?		#NAME?	#NAME?
Q7Z5K2	Wings apart-like protein homolog	WAPL	-0.992056	-1.19331	-2.93568	-2.51906	-0.485722	-4.60915	-0.569696	-0.467411	-0.146823	0.332486	-3.23311	-1.05159	#NAME?	0.662911		1.26647	#NAME?	#NAME?		#NAME?	#NAME?
Q9Y2G5	GDP-fucose protein O-fucosyltransferase 2	POFUT2	-1.26141	-1.77063	-0.942768	-1.31668	-0.705787	-0.607528	-1.13815	-0.561713	-0.133337	0.0757078	-0.733325	-0.100894	#NAME?	0.900873		0.668849	#NAME?	#NAME?		#NAME?	#NAME?
Q9BQ69	ADP-ribose glycohydrolase MACROD1	MACROD1	0.332883	0.387391	0.327852	0.76705	-0.388583	0.460198	0.683329	1.01741	0.57422	0.718051	1.45143	0.950537	#NAME?	0.702378		0.584698	#NAME?	#NAME?		#NAME?	#NAME?
Q8WVT3	Trafficking protein particle complex subunit 12	TRAPPC12	-3.11392	-3.18843	-1.63421	-6.50209	-2.62671	-3.75455	1.13864	-2.57432	-6.38718	-2.05012	1.95823	-2.60157	#NAME?	0.21332		1.71727	#NAME?	#NAME?		#NAME?	#NAME?
Q15424	Scaffold attachment factor B1	SAFB	1.12154	1.41895	1.33295	1.36239	1.54849	0.831546	2.04047	0.909547	3.01104	3.09738	1.0098	3.27523	#NAME?	0.00693294		0.954598	#NAME?	#NAME?		#NAME?	#NAME?
Q96T88	E3 ubiquitin-protein ligase UHRF1	UHRF1	-1.11653	-2.26741	-3.04774	-6.41382	-6.45403	-2.61638	-0.788342	-2.71145	-3.32248	-2.24869	-2.06283	-2.16907	#NAME?	0.0499914		1.43551	#NAME?	#NAME?		#NAME?	#NAME?
Q00013	55 kDa erythrocyte membrane protein	MPP1	-3.07486	-2.64762	-4.4551	-2.6041	-4.46043	-3.54921	-3.52117	-2.71741	-2.18477	-2.28066	-2.59393	-2.44348	#NAME?	0.245485		0.841648	#NAME?	#NAME?		#NAME?	#NAME?
Q6NUQ1	RAD50-interacting protein 1	RINT1	-1.35014	-1.54299	-1.62487	-1.99878	-1.63351	-2.43294	-1.26188	-1.38376	-1.09647	-0.860761	-1.13815	-1.52291	#NAME?	0.282444		0.553214	#NAME?	#NAME?		#NAME?	#NAME?
Q12846	Syntaxin-4	STX4	1.41111	1.64913	1.36808	1.6047	1.80737	1.52825	4.50466	1.45009	1.98401	1.54522	5.43646	1.45291	#NAME?	6.72072e-05		1.16745	#NAME?	#NAME?		#NAME?	#NAME?
P54105	Methylosome subunit pICln	CLNS1A	-6.05789	-6.32244	-5.27418	-6.38359	-6.52257	-4.21284	-5.45123	-6.14827	-4.43978	-5.65655	-3.23027	-3.35068	#NAME?	0.495643		1.08279	#NAME?	#NAME?		#NAME?	#NAME?
Q96A49	Synapse-associated protein 1	SYAP1	-1.39585	-1.21156	-1.78275	-1.25322	-1.58731	-2.08572	-0.281766	-0.612396	-0.959011	-0.471885	-2.75116	-0.299457	#NAME?	0.041635		0.656789	#NAME?	#NAME?		#NAME?	#NAME?
P35249	Replication factor C subunit 4	RFC4	2.6021	-0.307438	0.628338	-0.271561	3.0497	1.30331	0.317311	2.8059	3.39768	3.65902	0.449582	4.43143	#NAME?	0.682199		1.34275	#NAME?	#NAME?		#NAME?	#NAME?
Q9NXR1	Nuclear distribution protein nudE homolog 1	NDE1	-3.06654	-5.13204	-6.30999	-6.2775	-2.95063	-5.4956	-1.39673	-2.41212	-5.14396	-3.53069	-1.34629	-6.639	#NAME?	0.469096		1.46058	#NAME?	#NAME?		#NAME?	#NAME?
Q86TB9	Protein PAT1 homolog 1	PATL1	-1.56458	-4.26683	-2.72834	-4.41786	-4.60415	-4.07851	-2.36112	-1.76437	-1.98281	-3.87029	-2.79973	-2.67719	#NAME?	0.318211		1.03413	#NAME?	#NAME?		#NAME?	#NAME?
Q14789	Golgin subfamily B member 1	GOLGB1	1.73413	0.656072	1.77498	0.959043	-0.618836	1.21891	1.56156	1.40472	2.06341	1.90916	2.37404	1.41973	#NAME?	0.0981477		0.834718	#NAME?	#NAME?		#NAME?	#NAME?
Q9NQ50	39S ribosomal protein L40, mitochondrial	MRPL40	-0.562766	-4.66468	-0.771151	-4.89387	-1.11531	-4.45977	-3.71256	-0.418663	-0.17788	-0.131291	-3.53074	0.678601	#NAME?	0.813651		1.52917	#NAME?	#NAME?		#NAME?	#NAME?
Q69YN2	CWF19-like protein 1	CWF19L1	-0.57529	-0.523965	-0.268353	-0.556152	-1.4815	-0.647895	3.19947	-0.316711	-0.633707	-0.0641498	3.0078	-1.41278	#NAME?	0.00388557		1.30551	#NAME?	#NAME?		#NAME?	#NAME?
Q14197	Peptidyl-tRNA hydrolase ICT1, mitochondrial	MRPL58	0.382287	0.330879	0.287454	0.0731743	0.596366	0.297479	0.15863	3.00346	1.33595	1.33206	0.107823	1.66643	#NAME?	0.000960021		0.939453	#NAME?	#NAME?		#NAME?	#NAME?
Q9BXJ9	N-alpha-acetyltransferase 15, NatA auxiliary subunit	NAA15	1.63993	2.0683	1.95125	1.74616	2.24274	2.0601	5.00157	1.60709	2.1582	2.09295	5.28881	2.53437	#NAME?	0.000532326		1.16242	#NAME?	#NAME?		#NAME?	#NAME?
Q969M1	Mitochondrial import receptor subunit TOM40B	TOMM40L	-2.64716	-2.52686	-3.93126	-3.68733	-2.69399	-2.91817	-2.74884	-2.58688	-2.57873	-2.15357	-1.66743	-2.46427	#NAME?	0.394766		0.700843	#NAME?	#NAME?		#NAME?	#NAME?
Q9H496	Torsin-1A-interacting protein 2, isoform IFRG15	TOR1AIP2	-0.517775	-3.84003	-3.66491	-3.93776	-3.60614	-3.00901	-2.74433	-1.05693	-1.23145	-1.1546	-4.3065	-1.26982	#NAME?	0.990893		1.13533	#NAME?	#NAME?		#NAME?	#NAME?
P16383	GC-rich sequence DNA-binding factor 2	GCFC2	-3.48567	-2.21726	-2.8326	-3.15305	-3.89687	-4.90068	-2.18889	-3.65181	-2.54908	-1.86368	-1.38012	-3.13675	#NAME?	0.82496		0.952632	#NAME?	#NAME?		#NAME?	#NAME?
Q8WUY1	Protein THEM6	THEM6	1.94897	1.33552	1.11322	1.22769	1.5364	1.2238	2.2945	1.80004	1.96998	1.90616	2.12956	1.43131	#NAME?	0.949426		0.524328	#NAME?	#NAME?		#NAME?	#NAME?
Q8WVQ1	Soluble calcium-activated nucleotidase 1	CANT1	-2.98809	-4.96763	-2.71859	-1.98217	-4.74519	-4.6182	-4.2936	-2.90716	-1.49569	0.050438	-4.49618	-0.955997	#NAME?	0.419999		1.32028	#NAME?	#NAME?		#NAME?	#NAME?
Q8WUM4	Programmed cell death 6-interacting protein	PDCD6IP	1.67856	2.89567	3.49934	2.68562	2.66723	2.82022	2.93315	1.91914	5.26934	5.31403	4.4592	2.77409	#NAME?	0.0740274		1.07039	#NAME?	#NAME?		#NAME?	#NAME?
Q9H3H5	UDP-N-acetylglucosamine--dolichyl-phosphate N-acetylglucosaminephosphotransferase	DPAGT1	0.125436	-0.286361	-1.16081	-0.832198	-0.484809	-0.747959	-0.0879613	-0.591266	0.60209	0.113286	0.570659	-0.0902915	#NAME?	0.998844		0.650536	#NAME?	#NAME?		#NAME?	#NAME?
P55268	Laminin subunit beta-2	LAMB2	-2.67667	-3.44279	-3.01071	-2.39219	-1.87997	-3.53108	0.788081	-1.88824	-3.04155	-3.61891	2.77807	-3.06016	#NAME?	0.00821804		1.48178	#NAME?	#NAME?		#NAME?	#NAME?
Q6P1M3	Lethal(2) giant larvae protein homolog 2	LLGL2	-1.78435	-1.50129	-1.15848	-1.49599	-1.78552	-2.61202	0.304542	-1.37578	-1.83387	-1.03104	-0.362737	-1.27671	#NAME?	0.346174		0.793676	#NAME?	#NAME?		#NAME?	#NAME?
Q9UF12	Hydroxyproline dehydrogenase	PRODH2	-0.245304	-0.27057	-0.353302	-0.263149	-0.530631	-0.310507	0.278388	-0.138454	0.0892064	-0.30116	-0.26394	1.71754	#NAME?	0.000535155		0.559174	#NAME?	#NAME?		#NAME?	#NAME?
Q86TE4	Leucine zipper protein 2	LUZP2	-3.32129	-3.3908	-3.40992	-3.15047	-2.79397	-6.59008	-3.49134	-3.4223	-2.93419	-2.55827	-1.66397	-2.1505	#NAME?	0.172561		1.07266	#NAME?	#NAME?		#NAME?	#NAME?
Q9NZW5	MAGUK p55 subfamily member 6	MPP6	-1.60657	-2.07083	-2.26755	-2.98546	-2.1069	-5.83939	-2.48404	-1.42173	-1.54764	-1.64349	-1.92083	-1.08989	#NAME?	0.021844		1.12818	#NAME?	#NAME?		#NAME?	#NAME?
Q13393	Phospholipase D1	PLD1	-2.17646	-5.20584	-5.06679	-3.16607	-1.06605	-6.52091	-6.62045	-0.699256	-0.271733	-0.798121	-6.16868	-1.17386	#NAME?	0.461049		1.245	#NAME?	#NAME?		#NAME?	#NAME?
Q9NQE9	Histidine triad nucleotide-binding protein 3	HINT3	-2.58771	-2.21918	-2.29847	-1.9821	-1.7701	-2.50416	-1.9803	-1.96188	-1.78875	-1.56694	-1.71964	-1.42855	#NAME?	0.455256		0.48594	#NAME?	#NAME?		#NAME?	#NAME?
Q9NXG6	Transmembrane prolyl 4-hydroxylase	P4HTM	-5.19908	-6.33352	-6.35532	-4.84833	-6.33475	-6.55434	-4.65733	-5.58515	-5.43635	-6.33131	-4.57032	-3.42752	#NAME?	0.480253		0.936226	#NAME?	#NAME?		#NAME?	#NAME?
O00422	Histone deacetylase complex subunit SAP18	SAP18	0.639644	0.488043	0.553113	0.342207	0.532822	0.327695	0.799541	0.777068	0.778698	0.828247	0.824734	1.00141	#NAME?	0.426392		0.354362	#NAME?	#NAME?		#NAME?	#NAME?
P61006	Ras-related protein Rab-8A	RAB8A	0.474497	0.470914	0.267283	0.296091	0.738162	0.129387	1.0303	0.449385	1.42537	0.762388	1.32402	0.583371	#NAME?	0.196572		0.533082	#NAME?	#NAME?		#NAME?	#NAME?
O75339	Cartilage intermediate layer protein 1	CILP	-6.26005	-2.16861	-1.88177	-1.90053	-3.3086	-2.38723	-2.10468	-2.93868	-1.99131	-1.59532	-1.28866	-1.02448	#NAME?	0.068533		1.16061	#NAME?	#NAME?		#NAME?	#NAME?
Q5W111	SPRY domain-containing protein 7	SPRYD7	-1.31613	-1.4974	-1.24723	-1.85539	-2.14597	-2.68488	-1.31757	-0.645819	-0.887842	-1.50385	-1.27863	-1.24368	#NAME?	0.244528		0.644932	#NAME?	#NAME?		#NAME?	#NAME?
Q15125	3-beta-hydroxysteroid-Delta(8),Delta(7)-isomerase	EBP	3.51846	3.56498	3.38234	2.98956	3.28048	3.02125	3.87274	3.60428	3.84888	3.66598	4.29047	3.41542	#NAME?	0.663181		0.490116	#NAME?	#NAME?		#NAME?	#NAME?
Q9BU61	NADH dehydrogenase [ubiquinone] 1 alpha subcomplex assembly factor 3	NDUFAF3	-0.417273	0.919116	-1.67546	-0.0172058	0.944548	0.908632	4.05548	-1.00834	-0.0379577	0.85682	4.72042	0.479579	#NAME?	0.104424		1.40061	#NAME?	#NAME?		#NAME?	#NAME?
O43815	Striatin	STRN	0.567755	-0.0767216	-0.213034	-0.219121	-1.00887	-1.86895	0.869945	0.309253	-0.00546057	0.141007	1.97613	-0.556758	#NAME?	0.946813		0.925508	#NAME?	#NAME?		#NAME?	#NAME?
P22061	Protein-L-isoaspartate(D-aspartate) O-methyltransferase	PCMT1	3.82794	3.44549	2.12155	3.35269	5.24612	5.37885	4.66255	2.69944	5.06557	5.62195	6.40669	5.81141	#NAME?	0.921011		1.14916	#NAME?	#NAME?		#NAME?	#NAME?
Q14160	Protein scribble homolog	SCRIB	2.80877	-0.101191	0.133873	-0.0622931	3.16523	-0.873469	-0.818308	3.08894	2.83531	3.10089	0.285573	3.06063	#NAME?	0.962464		1.08035	#NAME?	#NAME?		#NAME?	#NAME?
P51159	Ras-related protein Rab-27A	RAB27A	-2.31394	-1.60739	-3.62176	-4.5653	-1.88261	-5.25635	0.89267	-4.62223	-3.04818	-2.49171	2.16803	-2.93989	#NAME?	0.250524		1.53434	#NAME?	#NAME?		#NAME?	#NAME?
O75915	PRA1 family protein 3	ARL6IP5	-0.830646	-1.77075	-1.9727	-1.82301	-1.4958	-1.45972	-0.0287007	-1.37982	-1.18396	-0.920175	-0.0932282	-1.50241	#NAME?	0.338619		0.70739	#NAME?	#NAME?		#NAME?	#NAME?
Q9UJZ1	Stomatin-like protein 2, mitochondrial	STOML2	1.95305	2.51817	1.99115	2.08416	2.96711	2.67714	2.86245	1.80641	4.70413	4.33122	3.19116	2.66692	#NAME?	0.0566965		0.895253	#NAME?	#NAME?		#NAME?	#NAME?
O00178	GTP-binding protein 1	GTPBP1	-2.24913	-4.18045	-3.07248	-1.68063	-3.22648	-0.0671454	-0.687336	-2.19434	-3.31015	0.428387	-1.08022	-0.411425	#NAME?	0.886205		1.20354	#NAME?	#NAME?		#NAME?	#NAME?
Q8TED0	U3 small nucleolar RNA-associated protein 15 homolog	UTP15	-0.09418	-0.327182	0.510959	-0.337487	-0.0137243	-0.620984	1.26663	0.18405	0.300597	0.239725	1.34344	-0.0993218	#NAME?	0.340333		0.686287	#NAME?	#NAME?		#NAME?	#NAME?
Q9HCE6	Rho guanine nucleotide exchange factor 10-like protein	ARHGEF10L	2.30562	2.1086	2.0907	2.2851	2.24861	1.47811	2.6498	3.33778	2.66998	2.70262	2.45269	2.10041	#NAME?	0.580001		0.566089	#NAME?	#NAME?		#NAME?	#NAME?
P23141	Liver carboxylesterase 1	CES1	0.84406	-0.503878	-1.32748	-0.49928	-2.81375	-0.645393	1.39263	0.355001	0.681111	0.464183	-4.97552	2.1495	#NAME?	0.127563		0.83544	#NAME?	#NAME?		#NAME?	#NAME?
Q7Z3Y7	Keratin, type I cytoskeletal 28	KRT28	-3.22701	-3.44606	-5.44374	-3.69735	-4.34302	-4.32897	-1.51515	-4.39869	-1.95587	-4.91402	-1.36237	-3.59651	#NAME?	0.181183		1.12393	#NAME?	#NAME?		#NAME?	#NAME?
P14373	Zinc finger protein RFP	TRIM27	0.133091	0.0204251	0.105483	-0.259787	0.236755	0.244358	1.59308	0.0764003	0.152021	0.0288389	2.14374	1.59409	#NAME?	0.00279267		0.851307	#NAME?	#NAME?		#NAME?	#NAME?
Q2TAA2	Isoamyl acetate-hydrolyzing esterase 1 homolog	IAH1	-4.23312	-6.31658	-6.47797	-3.3093	-6.44054	-6.66095	-3.98436	-5.47915	-4.26502	-6.21974	-1.3419	-4.51552	#NAME?	0.740383		1.27213	#NAME?	#NAME?		#NAME?	#NAME?
Q9NRX1	RNA-binding protein PNO1	PNO1	1.40991	0.729473	0.937285	0.590993	1.02556	1.00256	1.51661	1.26359	1.41132	1.31223	1.71791	1.18037	#NAME?	0.434708		0.451043	#NAME?	#NAME?		#NAME?	#NAME?
Q03519	Antigen peptide transporter 2	TAP2	-4.56167	-6.3378	-5.09141	-6.4357	-5.66045	-4.60542	-2.90618	-4.2968	-6.34486	-4.60522	-3.16577	-5.1826	#NAME?	0.361514		1.03184	#NAME?	#NAME?		#NAME?	#NAME?
O00154	Cytosolic acyl coenzyme A thioester hydrolase	ACOT7	3.84958	4.38884	2.83516	3.98974	2.80745	4.02217	4.62491	3.73941	4.20478	4.46431	4.78341	4.25881	#NAME?	0.220353		0.697116	#NAME?	#NAME?		#NAME?	#NAME?
Q9H2K0	Translation initiation factor IF-3, mitochondrial	MTIF3	-2.40196	-4.96062	-4.81019	-6.43249	-6.47046	-6.51994	-2.43882	-2.10011	-2.756	-6.20574	-3.27162	-6.57711	#NAME?	0.658188		1.37437	#NAME?	#NAME?		#NAME?	#NAME?
Q3SXM5	Inactive hydroxysteroid dehydrogenase-like protein 1	HSDL1	1.95636	1.32251	1.08809	1.2606	1.20551	0.817004	1.2962	1.84231	2.08667	1.89243	1.7856	1.92914	#NAME?	0.473679		0.530378	#NAME?	#NAME?		#NAME?	#NAME?
O95801	Tetratricopeptide repeat protein 4	TTC4	1.11605	0.954964	0.962831	1.06935	1.07741	0.768095	1.6481	1.20329	1.66765	1.76205	0.915678	1.79605	#NAME?	0.0411391		0.507353	#NAME?	#NAME?		#NAME?	#NAME?
Q9NX63	MICOS complex subunit MIC19	CHCHD3	1.89234	1.81313	1.6348	1.90689	1.95268	1.86246	2.44137	1.96889	2.46481	2.3351	2.98082	1.98901	#NAME?	0.019905		0.519616	#NAME?	#NAME?		#NAME?	#NAME?
P53701	Cytochrome c-type heme lyase	HCCS	-6.17521	-1.13226	-2.51202	-1.54583	-6.57631	-1.87797	2.94119	-0.391382	-6.31536	-1.27535	3.95294	-6.61262	#NAME?	0.206236		2.01983	#NAME?	#NAME?		#NAME?	#NAME?
Q9H0R3	Transmembrane protein 222	TMEM222	-2.74016	-2.51682	-2.27767	-3.93857	-2.74967	-2.65151	-2.41842	-2.02988	-2.18512	-1.99979	-2.61468	-1.79236	#NAME?	0.17578		0.639024	#NAME?	#NAME?		#NAME?	#NAME?
Q7KZF4	Staphylococcal nuclease domain-containing protein 1	SND1	4.97114	4.24625	2.69976	3.15931	4.73817	3.1299	4.24984	4.24116	4.44715	4.61174	5.26364	5.12734	#NAME?	0.117568		0.83272	#NAME?	#NAME?		#NAME?	#NAME?
Q13330	Metastasis-associated protein MTA1	MTA1	1.75411	0.622685	-1.34173	0.967792	0.536265	1.22001	3.66558	0.932731	1.2132	-1.17713	3.69125	2.99941	#NAME?	0.21893		1.26099	#NAME?	#NAME?		#NAME?	#NAME?
Q9GZU7	Carboxy-terminal domain RNA polymerase II polypeptide A small phosphatase 1	CTDSP1	-0.109406	-1.02987	-1.6355	-1.91236	-0.0883741	-1.73265	-0.642708	-0.743182	-1.10096	0.164653	0.0217061	0.941781	#NAME?	0.842856		0.858242	#NAME?	#NAME?		#NAME?	#NAME?
Q96BZ9	TBC1 domain family member 20	TBC1D20	-3.08331	-3.58252	-6.41876	-6.2538	-3.8296	-6.44186	-4.13562	-3.8084	-3.62085	-1.417	-4.48585	-4.0459	#NAME?	0.43832		1.34937	#NAME?	#NAME?		#NAME?	#NAME?
P13073	Cytochrome c oxidase subunit 4 isoform 1, mitochondrial	COX4I1	3.91931	3.41454	2.73503	3.68948	3.44336	3.94743	4.35126	3.76676	4.10465	3.70695	4.85083	4.07136	#NAME?	0.891147		0.617107	#NAME?	#NAME?		#NAME?	#NAME?
P27449	V-type proton ATPase 16 kDa proteolipid subunit	ATP6V0C	3.15746	3.31707	2.97804	3.51474	3.36585	2.73818	4.01874	3.36871	4.35666	3.95908	3.45857	3.27668	#NAME?	0.37395		0.561184	#NAME?	#NAME?		#NAME?	#NAME?
Q9Y285	Phenylalanine--tRNA ligase alpha subunit	FARSA	2.80926	1.29921	1.19919	0.751161	1.59509	1.53396	1.07504	2.55105	2.5235	3.08625	1.32809	4.64391	#NAME?	0.199258		1.00333	#NAME?	#NAME?		#NAME?	#NAME?
Q8N2U0	Transmembrane protein 256	TMEM256	0.212309	0.768162	0.460646	-0.100251	0.996168	0.433722	0.706941	0.469457	0.992271	1.22981	1.32175	1.57972	#NAME?	0.908547		0.588198	#NAME?	#NAME?		#NAME?	#NAME?
Q9H8Y5	Ankyrin repeat and zinc finger domain-containing protein 1	ANKZF1	-2.272	-1.79879	-2.59569	-2.39805	-1.1658	-3.46227	-1.05166	-2.1365	-1.59745	-1.82992	-0.113511	-1.91761	#NAME?	0.946036		0.840992	#NAME?	#NAME?		#NAME?	#NAME?
Q8NFH5	Nucleoporin NUP35	NUP35	1.16242	-0.238891	-0.0838791	-0.68831	0.259916	-0.0708694	-0.269774	0.899116	0.522779	0.942826	1.47525	1.28058	#NAME?	0.998081		0.751731	#NAME?	#NAME?		#NAME?	#NAME?
Q7Z7K6	Centromere protein V	CENPV	2.07729	2.39548	2.29779	2.03265	1.64003	1.99238	2.55878	2.08051	2.46179	2.459	3.04779	2.85844	#NAME?	0.599596		0.505116	#NAME?	#NAME?		#NAME?	#NAME?
Q2YD98	UV-stimulated scaffold protein A	UVSSA	-0.407658	-6.19917	-6.43485	-6.34754	-6.50444	-6.61385	-6.6194	0.315053	-6.46833	-0.262548	-6.8219	-0.0502328	#NAME?	0.408712		2.10003	#NAME?	#NAME?		#NAME?	#NAME?
Q96SK2	Transmembrane protein 209	TMEM209	-0.464346	-1.58916	-1.89331	-1.68063	-0.519133	-0.996728	-1.99632	-0.306157	0.600648	0.5325	1.68255	-1.53494	#NAME?	0.0980941		1.02026	#NAME?	#NAME?		#NAME?	#NAME?
P35558	Phosphoenolpyruvate carboxykinase, cytosolic [GTP]	PCK1	0.494257	-0.397451	-0.386171	-0.364829	-1.44952	-0.145066	0.104605	1.15364	1.73497	1.80389	0.736078	-1.77532	#NAME?	0.121591		1.00111	#NAME?	#NAME?		#NAME?	#NAME?
P46199	Translation initiation factor IF-2, mitochondrial	MTIF2	-1.07092	-1.09418	-0.197586	-1.18595	-1.04863	-1.08258	0.266066	-1.03145	-0.543001	-0.488072	1.02714	-0.572781	#NAME?	0.15308		0.72296	#NAME?	#NAME?		#NAME?	#NAME?
Q16774	Guanylate kinase	GUK1	0.413275	-0.0614016	-0.222375	0.00548839	0.349013	-0.744207	0.430232	0.306125	0.225638	0.443211	1.44784	0.307216	#NAME?	0.857204		0.570077	#NAME?	#NAME?		#NAME?	#NAME?
Q6P1N0	Coiled-coil and C2 domain-containing protein 1A	CC2D1A	-1.08492	-3.59058	-3.44999	-3.67006	-3.00702	-3.56794	-1.94919	-1.39423	-1.94823	-1.65777	-3.13555	-2.90981	#NAME?	0.454286		0.895954	#NAME?	#NAME?		#NAME?	#NAME?
P02647	Apolipoprotein A-I	APOA1	3.74505	3.83492	4.0415	4.30229	4.50605	4.38369	4.31433	4.31585	4.94494	4.49169	4.88107	4.86553	#NAME?	0.919437		0.499986	#NAME?	#NAME?		#NAME?	#NAME?
P56378	ATP synthase subunit ATP5MPL, mitochondrial	ATP5MPL	2.36412	2.25142	1.88559	1.99424	2.218	1.8999	2.69503	2.05682	2.74461	2.44321	3.11214	2.48198	#NAME?	0.244132		0.486754	#NAME?	#NAME?		#NAME?	#NAME?
Q16563	Synaptophysin-like protein 1	SYPL1	1.83628	1.01683	1.64249	1.02345	1.03058	0.653448	1.51628	1.9765	1.5371	2.12631	1.44655	1.99452	#NAME?	0.396731		0.565695	#NAME?	#NAME?		#NAME?	#NAME?
Q7Z3C6	Autophagy-related protein 9A	ATG9A	-0.182335	-0.41117	-0.314946	-0.622366	-0.309401	1.0021	-0.202131	-0.526891	1.26467	1.3414	0.387436	2.16967	#NAME?	0.231263		0.878711	#NAME?	#NAME?		#NAME?	#NAME?
Q9NPA0	ER membrane protein complex subunit 7	EMC7	-0.166221	0.000172758	-0.371131	0.706225	-0.0721602	-0.220791	0.105083	0.763755	0.215007	0.601954	0.496622	0.937317	#NAME?	0.713094		0.540607	#NAME?	#NAME?		#NAME?	#NAME?
Q92845	Kinesin-associated protein 3	KIFAP3	-2.4543	-2.30663	-3.97022	-2.30317	-3.27668	-2.20565	-1.72952	-2.48715	-1.86682	-2.17504	-2.2047	-1.92345	#NAME?	0.0575944		0.68833	#NAME?	#NAME?		#NAME?	#NAME?
Q9Y624	Junctional adhesion molecule A	F11R	1.58891	1.7188	1.49708	1.34223	0.0346981	1.22331	2.05715	1.0682	1.11867	2.05292	3.03127	3.04381	#NAME?	0.461617		0.827834	#NAME?	#NAME?		#NAME?	#NAME?
Q04323	UBX domain-containing protein 1	UBXN1	1.58138	1.64873	0.44393	0.153903	0.235552	0.192713	0.0618649	2.19424	2.27767	2.01169	0.361	2.04106	#NAME?	0.467559		0.781885	#NAME?	#NAME?		#NAME?	#NAME?
Q8IWA0	WD repeat-containing protein 75	WDR75	0.113188	-0.975763	-1.17178	-1.03888	1.01987	-1.37976	-0.584918	2.03285	1.77059	1.31528	-0.848108	-0.771309	#NAME?	0.434474		1.05792	#NAME?	#NAME?		#NAME?	#NAME?
Q9NP81	Serine--tRNA ligase, mitochondrial	SARS2	1.14582	1.51042	1.27184	1.32305	1.25928	1.30131	1.63059	1.55263	1.6947	1.49914	1.80136	1.47779	#NAME?	0.928335		0.307415	#NAME?	#NAME?		#NAME?	#NAME?
P41247	Patatin-like phospholipase domain-containing protein 4	PNPLA4	-1.09826	-4.14019	-4.00222	-4.09081	-3.96562	-2.91714	-1.76678	-2.10074	-2.46485	-2.45951	-3.05508	-2.69227	#NAME?	0.04974		0.945833	#NAME?	#NAME?		#NAME?	#NAME?
Q86UE4	Protein LYRIC	MTDH	0.700854	1.34839	1.04266	1.23009	0.860157	0.986802	2.71541	0.386692	1.28328	0.994043	3.81768	2.86813	#NAME?	0.00181395		0.982714	#NAME?	#NAME?		#NAME?	#NAME?
O75828	Carbonyl reductase [NADPH] 3	CBR3	-0.567026	-0.0581068	-0.34995	-0.290448	-0.172137	-3.17867	0.768623	0.414261	0.163588	0.0552114	-0.0584575	-0.340937	#NAME?	0.0270235		0.936438	#NAME?	#NAME?		#NAME?	#NAME?
Q9BQ39	ATP-dependent RNA helicase DDX50	DDX50	0.249741	0.62588	0.462091	0.773747	1.10909	0.307305	1.23417	0.39121	1.01408	1.2129	1.65072	1.39477	#NAME?	0.544863		0.561665	#NAME?	#NAME?		#NAME?	#NAME?
Q641Q2	WASH complex subunit 2A	WASHC2A	-3.67082	-6.41046	-5.54517	-5.42422	-4.26004	-6.42877	-3.31373	-3.90672	-3.27893	-4.39767	-4.05527	-6.50373	#NAME?	0.904052		1.04724	#NAME?	#NAME?		#NAME?	#NAME?
P49327	Fatty acid synthase	FASN	5.11158	5.31621	4.87113	5.17573	5.74114	5.49465	6.3025	5.34837	5.54809	5.54077	6.95871	5.84568	#NAME?	0.158265		0.638946	#NAME?	#NAME?		#NAME?	#NAME?
Q96CS3	FAS-associated factor 2	FAF2	0.612588	0.608394	0.575575	0.675146	0.228236	0.715881	2.32516	0.291971	0.797148	1.29282	2.85534	0.876347	#NAME?	0.00170403		0.837163	#NAME?	#NAME?		#NAME?	#NAME?
Q8N9T8	Protein KRI1 homolog	KRI1	2.00435	0.0139766	-1.94537	-0.336147	-0.611528	-0.250386	-0.392484	1.58673	1.70709	1.51938	-0.426679	1.5851	#NAME?	0.663554		1.11737	#NAME?	#NAME?		#NAME?	#NAME?
O95445	Apolipoprotein M	APOM	2.25598	2.14095	1.69598	2.09616	1.72289	2.46468	6.15581	2.34204	1.49225	1.23952	7.23576	2.30111	#NAME?	0.000233789		1.39831	#NAME?	#NAME?		#NAME?	#NAME?
Q8N488	RING1 and YY1-binding protein	RYBP	-4.24433	-4.1296	-7.98529	-7.46723	-3.17341	-6.48478	-4.80893	-2.22947	-2.37982	-2.42995	-10.2044	-4.75607	#NAME?	0.370103		1.11267	#NAME?	#NAME?		#NAME?	#NAME?
Q7Z4V5	Hepatoma-derived growth factor-related protein 2	HDGFL2	-0.42873	-1.15187	-1.15345	-1.96442	-0.94316	-1.43359	-0.419229	-0.255281	0.185823	-0.443382	-0.521376	-1.54174	#NAME?	0.813229		0.680005	#NAME?	#NAME?		#NAME?	#NAME?
P36542	ATP synthase subunit gamma, mitochondrial	ATP5F1C	4.13876	4.33617	4.31752	4.37748	3.92323	4.29209	4.44866	4.18671	4.80726	4.64608	5.35783	4.94699	#NAME?	0.0807301		0.501379	#NAME?	#NAME?		#NAME?	#NAME?
Q9Y3L3	SH3 domain-binding protein 1	SH3BP1	-1.23734	-1.97947	-2.22116	-2.35524	-3.58603	-2.40136	0.54296	-1.75569	-0.515215	-2.34549	-1.47218	-2.5242	#NAME?	0.369903		0.951797	#NAME?	#NAME?		#NAME?	#NAME?
Q8N0X4	Citramalyl-CoA lyase, mitochondrial	CLYBL	-2.37511	-3.04177	0.165656	-2.73576	-1.50039	-1.18318	2.15038	-0.7086	-2.12948	-2.07124	2.8866	-2.62461	#NAME?	0.156216		1.36227	#NAME?	#NAME?		#NAME?	#NAME?
Q6ZMG9	Ceramide synthase 6	CERS6	-2.22771	-2.14329	-1.86137	-1.95791	-2.095	-2.34395	-2.4461	-1.13611	-1.25788	-1.79003	-1.33784	-1.08399	#NAME?	0.0318784		0.596213	#NAME?	#NAME?		#NAME?	#NAME?
O43795	Unconventional myosin-Ib	MYO1B	2.67553	1.84917	1.84274	1.44338	3.44294	1.72383	2.9996	2.77629	2.81304	2.68997	3.38489	2.50142	#NAME?	0.0692016		0.697938	#NAME?	#NAME?		#NAME?	#NAME?
O43325	LYR motif-containing protein 1	LYRM1	-6.22012	-2.83659	-6.25449	-6.32482	-6.51793	-6.48002	-6.39257	-5.94134	-2.6111	-6.19042	-2.04736	-6.37975	#NAME?	0.473873		0.845239	#NAME?	#NAME?		#NAME?	#NAME?
P38936	Cyclin-dependent kinase inhibitor 1	CDKN1A	-6.23654	-6.29526	-6.51938	-6.45874	-6.56123	-5.40671	-1.58077	-1.4258	-6.24229	-6.38097	-6.7778	-6.43127	#NAME?	0.00130878		1.43983	#NAME?	#NAME?		#NAME?	#NAME?
P18084	Integrin beta-5	ITGB5	-1.65409	-1.99656	-0.873655	-2.22102	-2.10592	-0.97904	0.433398	-0.793098	-2.51623	-1.75782	0.486361	-0.119084	#NAME?	0.13138		0.927302	#NAME?	#NAME?		#NAME?	#NAME?
Q6UN15	Pre-mRNA 3'-end-processing factor FIP1	FIP1L1	1.12439	0.649912	0.715814	0.143318	0.260172	-0.32608	1.12431	1.02171	0.968247	1.18735	1.22067	0.264324	#NAME?	0.452223		0.536515	#NAME?	#NAME?		#NAME?	#NAME?
Q9BRU9	rRNA-processing protein UTP23 homolog	UTP23	-1.61184	-2.33262	-1.82131	-2.04292	-3.89966	-2.28369	0.293213	-1.2231	-2.52746	-3.164	1.12506	-1.87536	#NAME?	0.146019		1.1034	#NAME?	#NAME?		#NAME?	#NAME?
Q15067	Peroxisomal acyl-coenzyme A oxidase 1	ACOX1	2.74459	2.53242	2.18958	2.2761	2.65263	2.02523	2.80968	2.41411	2.82944	2.76142	3.69293	3.16438	#NAME?	0.36177		0.541903	#NAME?	#NAME?		#NAME?	#NAME?
Q86UN3	Reticulon-4 receptor-like 2	RTN4RL2	-6.26116	-6.1646	-6.35716	-6.26713	-6.50742	-5.57184	-3.61576	-6.04515	-5.00123	-6.40645	-3.89864	-6.49295	#NAME?	0.00925961		0.944853	#NAME?	#NAME?		#NAME?	#NAME?
Q96N67	Dedicator of cytokinesis protein 7	DOCK7	1.87994	0.249167	-2.12695	0.307895	2.28504	-2.94997	-1.31449	1.99496	2.55891	2.73285	-0.978694	3.13787	#NAME?	0.893789		1.41438	#NAME?	#NAME?		#NAME?	#NAME?
P20339	Ras-related protein Rab-5A	RAB5A	-0.287248	-0.0894935	0.134638	0.178247	-0.230144	-0.0870897	1.30775	0.502013	-0.1425	-0.00324404	1.75368	0.455975	#NAME?	0.00900465		0.709127	#NAME?	#NAME?		#NAME?	#NAME?
Q9NVT9	Armadillo repeat-containing protein 1	ARMC1	2.96695	1.45623	-0.939349	0.934835	3.17185	-1.61429	-0.192036	2.8338	3.26441	3.26186	-1.07372	3.51978	#NAME?	0.956088		0.939646	#NAME?	#NAME?		#NAME?	#NAME?
O60716	Catenin delta-1	CTNND1	2.43968	0.891735	1.13954	1.06526	1.36928	1.10407	0.485945	2.32094	2.41011	2.57117	2.03896	2.88614	#NAME?	0.389241		0.783952	#NAME?	#NAME?		#NAME?	#NAME?
Q15526	Surfeit locus protein 1	SURF1	5.66468	0.365743	0.333248	-0.292735	6.55053	-1.90749	0.296811	5.79543	5.67619	5.18114	-0.943676	4.55883	#NAME?	0.742775		1.64179	#NAME?	#NAME?		#NAME?	#NAME?
O60503	Adenylate cyclase type 9	ADCY9	-3.86561	-5.36604	-5.65057	-6.27696	-4.03839	-6.58047	1.3347	-3.67521	-6.38842	-6.86958	0.222023	-6.3894	#NAME?	0.0232697		1.66869	#NAME?	#NAME?		#NAME?	#NAME?
P18074	General transcription and DNA repair factor IIH helicase subunit XPD	ERCC2	-1.55209	-1.87634	-2.35542	-3.09987	-2.44107	-2.11242	-1.02462	-1.32812	-0.773048	-0.922344	-2.65355	-2.24734	#NAME?	0.427702		0.748033	#NAME?	#NAME?		#NAME?	#NAME?
Q15437	Protein transport protein Sec23B	SEC23B	1.47043	1.08858	-0.168246	1.07699	-0.561323	2.06922	0.742815	2.03345	2.19449	2.64964	0.763062	1.90055	#NAME?	0.609542		0.884724	#NAME?	#NAME?		#NAME?	#NAME?
Q8TBC4	NEDD8-activating enzyme E1 catalytic subunit	UBA3	0.619299	0.436144	0.332248	0.609722	1.2109	-0.0133352	-1.29408	3.15672	3.58871	3.41426	-1.9504	2.58304	#NAME?	0.00107766		1.05054	#NAME?	#NAME?		#NAME?	#NAME?
Q9H7B2	Ribosome production factor 2 homolog	RPF2	0.07795	0.69761	0.752823	0.917873	0.856101	0.0603873	1.04088	0.23894	1.19775	1.21936	2.01489	1.4248	#NAME?	0.405514		0.628979	#NAME?	#NAME?		#NAME?	#NAME?
Q68CQ4	Digestive organ expansion factor homolog	DIEXF	-1.5325	-1.08596	-0.987693	-1.32028	-0.17708	-1.26796	-2.20667	-1.28528	2.40022	2.73248	-2.0806	1.83123	#NAME?	0.00326094		1.29381	#NAME?	#NAME?		#NAME?	#NAME?
Q9BRQ8	Apoptosis-inducing factor 2	AIFM2	0.984679	0.837265	0.832259	0.83029	1.15484	0.793517	2.42333	0.847148	1.63868	1.33012	3.19394	0.76658	#NAME?	0.000683134		0.79449	#NAME?	#NAME?		#NAME?	#NAME?
P45880	Voltage-dependent anion-selective channel protein 2	VDAC2	5.65414	5.81878	5.83526	5.54781	5.95507	5.35411	6.20963	5.50012	5.86557	6.45383	7.19577	6.7198	#NAME?	0.0442447		0.629925	#NAME?	#NAME?		#NAME?	#NAME?
Q96ER3	Protein SAAL1	SAAL1	-3.59792	-5.97258	-2.68351	-3.09152	-4.19075	-3.80344	-3.73091	-1.90048	-2.37118	-2.47493	-4.30715	-2.84075	#NAME?	0.617045		0.952384	#NAME?	#NAME?		#NAME?	#NAME?
Q15075	Early endosome antigen 1	EEA1	2.16799	2.47693	-0.157954	-0.247078	1.98174	1.43358	2.20795	1.84072	2.7273	2.37335	2.24739	1.67049	#NAME?	0.0247274		0.901997	#NAME?	#NAME?		#NAME?	#NAME?
Q9BZE9	Tether containing UBX domain for GLUT4	ASPSCR1	-2.51415	-1.93093	-1.13658	-1.2482	0.0538662	-2.26481	-0.554642	-0.868924	-1.44262	-0.365786	-0.309434	-0.824938	#NAME?	0.100749		0.779078	#NAME?	#NAME?		#NAME?	#NAME?
Q9Y4W2	Ribosomal biogenesis protein LAS1L	LAS1L	0.58019	-0.242455	-0.969372	-0.335691	0.876267	0.514213	1.67597	1.5266	-0.155418	-0.357729	1.87018	0.937932	#NAME?	0.501514		0.845731	#NAME?	#NAME?		#NAME?	#NAME?
Q16644	MAP kinase-activated protein kinase 3	MAPKAPK3	-1.17947	-1.33937	-4.16865	-1.09454	-0.898785	-1.18091	-0.147866	-0.905378	-1.10659	-1.18886	-1.40542	0.583775	#NAME?	0.303734		0.948564	#NAME?	#NAME?		#NAME?	#NAME?
Q09161	Nuclear cap-binding protein subunit 1	NCBP1	3.33392	1.56477	0.716637	1.13423	3.18754	0.888122	1.17307	2.77808	3.3148	3.20567	2.49088	3.52129	#NAME?	0.517775		0.943099	#NAME?	#NAME?		#NAME?	#NAME?
P42285	Exosome RNA helicase MTR4	MTREX	-0.343115	0.199243	2.06961	0.509845	0.374835	-0.0381399	2.10627	0.428447	0.916056	0.905304	2.66312	0.869587	#NAME?	0.955186		0.85275	#NAME?	#NAME?		#NAME?	#NAME?
Q86VM9	Zinc finger CCCH domain-containing protein 18	ZC3H18	-0.669272	-1.00135	-1.1575	-0.83881	-0.869681	-1.26738	-0.895773	-0.709399	-0.528271	-0.468918	-0.374819	-0.505808	#NAME?	0.748312		0.386836	#NAME?	#NAME?		#NAME?	#NAME?
P14927	Cytochrome b-c1 complex subunit 7	UQCRB	2.49207	2.13933	2.00851	2.01949	2.76524	2.26452	2.53818	2.30821	2.98879	2.67949	3.02905	2.96339	#NAME?	0.967559		0.469656	#NAME?	#NAME?		#NAME?	#NAME?
Q9BQ75	Protein CMSS1	CMSS1	0.988334	0.643594	0.657761	0.602427	0.667215	0.366357	3.30232	0.955214	0.48929	1.11388	3.6082	0.36325	#NAME?	0.000512253		0.98441	#NAME?	#NAME?		#NAME?	#NAME?
Q5T8P6	RNA-binding protein 26	RBM26	1.5398	0.967055	0.488635	0.937347	1.23496	0.768074	2.82365	1.37758	1.2154	1.26163	3.73435	0.792148	#NAME?	0.0250855		0.87815	#NAME?	#NAME?		#NAME?	#NAME?
O60547	GDP-mannose 4,6 dehydratase	GMDS	3.66384	3.58688	3.7664	3.2669	1.87886	3.0891	3.8183	3.65182	3.79028	3.45235	4.46162	4.06953	#NAME?	0.158459		0.665319	#NAME?	#NAME?		#NAME?	#NAME?
Q13268	Dehydrogenase/reductase SDR family member 2, mitochondrial	DHRS2	4.80193	5.13831	5.1458	5.10887	5.7884	5.5062	6.44305	5.59962	5.7582	5.81401	6.52335	4.99308	#NAME?	0.301696		0.606966	#NAME?	#NAME?		#NAME?	#NAME?
Q9NVV4	Poly(A) RNA polymerase, mitochondrial	MTPAP	-0.686645	1.08111	0.20191	0.540236	-1.04475	0.116832	0.790006	0.81377	0.563083	0.662971	1.57186	0.150763	#NAME?	0.277019		0.723958	#NAME?	#NAME?		#NAME?	#NAME?
P11169	Solute carrier family 2, facilitated glucose transporter member 3	SLC2A3	3.81184	3.86809	4.52611	4.06602	4.66929	4.53598	4.52727	4.14925	4.71808	4.78998	5.84802	5.17929	#NAME?	0.350756		0.62243	#NAME?	#NAME?		#NAME?	#NAME?
Q99747	Gamma-soluble NSF attachment protein	NAPG	-0.119148	-0.485039	-0.228848	-0.214246	-0.447403	-0.411657	0.0859897	0.262616	0.263236	0.285055	-0.195859	-0.290781	#NAME?	0.270274		0.3861	#NAME?	#NAME?		#NAME?	#NAME?
Q9BTA9	WW domain-containing adapter protein with coiled-coil	WAC	-2.50969	-6.16372	-5.62772	-3.93141	-5.43871	-3.70762	-6.34057	-2.02227	-1.63886	-1.90516	-6.99783	-2.44897	#NAME?	0.251074		1.0042	#NAME?	#NAME?		#NAME?	#NAME?
P05067	Amyloid-beta precursor protein	APP	-2.16517	-1.73875	-3.6448	-3.06229	-4.70276	-2.56611	0.758995	-1.73174	-3.87869	-3.91318	0.383915	-2.28436	#NAME?	0.194291		1.20247	#NAME?	#NAME?		#NAME?	#NAME?
P35613	Basigin	BSG	5.31874	5.23062	5.28296	5.28919	4.90094	5.11967	5.87395	5.13824	5.46626	5.44572	6.39983	6.00411	#NAME?	0.0361438		0.530998	#NAME?	#NAME?		#NAME?	#NAME?
Q01813	ATP-dependent 6-phosphofructokinase, platelet type	PFKP	-6.08123	-4.62964	-2.83164	-4.97582	-6.52757	-4.12191	-2.88892	-5.72241	-3.28326	-2.58559	-4.21076	-4.2493	#NAME?	0.746322		1.03793	#NAME?	#NAME?		#NAME?	#NAME?
Q9H6U8	Alpha-1,2-mannosyltransferase ALG9	ALG9	0.475994	-0.819755	-1.81248	-0.72152	-2.96324	-1.35412	0.198836	0.0536227	-0.338373	-0.397511	-0.215121	-1.33864	#NAME?	0.120476		0.859657	#NAME?	#NAME?		#NAME?	#NAME?
P49189	4-trimethylaminobutyraldehyde dehydrogenase	ALDH9A1	1.16188	0.662073	1.15921	0.890494	0.795196	1.67732	3.45442	0.471881	1.34416	1.41278	4.62574	1.18044	#NAME?	0.00550243		1.02388	#NAME?	#NAME?		#NAME?	#NAME?
P05023	Sodium/potassium-transporting ATPase subunit alpha-1	ATP1A1	5.45295	5.28341	5.4973	5.47269	5.67362	5.19606	5.8815	5.49595	5.68679	5.6653	6.72898	6.07396	#NAME?	0.0542205		0.492744	#NAME?	#NAME?		#NAME?	#NAME?
Q9NRG7	Epimerase family protein SDR39U1	SDR39U1	-3.22524	-6.18179	-6.28636	-6.46446	-2.22391	-6.63213	-6.50788	-3.05341	-2.88444	-2.21229	-3.11014	-6.51277	#NAME?	0.992092		1.12216	#NAME?	#NAME?		#NAME?	#NAME?
Q9BV10	Dol-P-Man:Man(7)GlcNAc(2)-PP-Dol alpha-1,6-mannosyltransferase	ALG12	-1.33726	-2.54034	-2.55314	-2.85877	-2.78909	-2.29317	-3.7265	-0.685289	-1.88169	-1.33144	-1.37495	0.027738	#NAME?	0.0921382		0.89994	#NAME?	#NAME?		#NAME?	#NAME?
Q13155	Aminoacyl tRNA synthase complex-interacting multifunctional protein 2	AIMP2	2.68753	2.69207	2.81209	2.72616	1.05772	2.42935	2.87438	2.57106	3.75412	2.63416	3.75362	2.81107	#NAME?	0.657796		0.665584	#NAME?	#NAME?		#NAME?	#NAME?
Q9UM00	Calcium load-activated calcium channel	TMCO1	2.27579	2.22975	2.22273	2.44703	2.83026	2.06306	2.82158	1.9745	2.88212	2.98064	3.55158	3.1727	#NAME?	0.167783		0.552413	#NAME?	#NAME?		#NAME?	#NAME?
P23634	Plasma membrane calcium-transporting ATPase 4	ATP2B4	-3.39157	-2.36271	-2.07881	-2.53339	-4.63796	-2.41543	-0.818727	-2.22766	-2.78392	-2.97919	-0.214137	-2.7711	#NAME?	0.677782		0.937521	#NAME?	#NAME?		#NAME?	#NAME?
Q92900	Regulator of nonsense transcripts 1	UPF1	2.13334	2.10784	1.82585	1.78546	1.67984	5.28342	2.89871	2.193	5.03978	4.81485	1.35578	5.46631	#NAME?	0.665442		1.15878	#NAME?	#NAME?		#NAME?	#NAME?
Q14149	MORC family CW-type zinc finger protein 3	MORC3	-4.1366	-2.73661	-3.01881	-3.09732	-3.52221	-2.82534	3.61123	-5.76533	-3.47279	-2.75792	1.6527	-3.23738	#NAME?	0.000720871		1.56123	#NAME?	#NAME?		#NAME?	#NAME?
Q02880	DNA topoisomerase 2-beta	TOP2B	1.04205	0.544143	-0.230925	0.0345141	0.57115	0.497639	2.13891	0.946739	0.14764	0.45875	3.15831	0.646814	#NAME?	0.056924		0.839765	#NAME?	#NAME?		#NAME?	#NAME?
Q96RE7	Nucleus accumbens-associated protein 1	NACC1	-1.55885	-1.57221	-4.64614	-1.92648	-2.42417	-1.60071	-1.13418	-1.5709	-2.58701	-1.64177	-0.705618	-0.717019	#NAME?	0.271599		0.895345	#NAME?	#NAME?		#NAME?	#NAME?
Q9GZZ9	Ubiquitin-like modifier-activating enzyme 5	UBA5	0.849533	-0.473205	0.382072	-0.0712689	0.857861	-0.127518	0.423289	1.05571	0.728693	0.807967	0.814546	0.891952	#NAME?	0.0540929		0.55078	#NAME?	#NAME?		#NAME?	#NAME?
Q8WWQ0	PH-interacting protein	PHIP	-1.93007	-1.57355	-1.70351	-1.74496	-2.81798	-0.791325	-2.37927	-1.38932	-0.218903	-0.315139	-1.44435	-0.066789	#NAME?	0.473131		0.79127	#NAME?	#NAME?		#NAME?	#NAME?
Q4J6C6	Prolyl endopeptidase-like	PREPL	-2.53088	-3.07415	-4.79536	-6.41481	-3.58153	-3.54274	-0.966695	-1.1103	-5.524	-2.67036	-2.52395	-4.13484	#NAME?	0.631545		1.16822	#NAME?	#NAME?		#NAME?	#NAME?
Q8N1Q1	Carbonic anhydrase 13	CA13	-3.45459	-3.06092	-3.36474	-2.7093	-4.98409	-3.5111	-0.787527	-4.49876	-2.52219	-3.07253	-1.87457	-2.82837	#NAME?	0.330831		0.9168	#NAME?	#NAME?		#NAME?	#NAME?
O60885	Bromodomain-containing protein 4	BRD4	1.75682	1.4545	1.14902	1.26604	0.0865227	1.20895	1.82072	1.99494	1.96476	1.5449	1.52843	1.44765	#NAME?	0.0817124		0.563257	#NAME?	#NAME?		#NAME?	#NAME?
Q9UKB3	DnaJ homolog subfamily C member 12	DNAJC12	1.35014	0.377257	0.235725	0.566965	0.871584	0.512979	1.80058	0.803991	1.50225	1.46694	1.97665	0.210551	#NAME?	0.295338		0.641051	#NAME?	#NAME?		#NAME?	#NAME?
Q02338	D-beta-hydroxybutyrate dehydrogenase, mitochondrial	BDH1	0.237118	0.238415	-0.414799	0.0684708	-0.526871	-0.0303447	0.692587	-0.0959391	0.427677	0.673002	1.10784	-0.0168339	#NAME?	0.47642		0.536058	#NAME?	#NAME?		#NAME?	#NAME?
Q9BQA1	Methylosome protein 50	WDR77	4.51912	3.94086	4.64899	4.81243	4.57685	4.95949	4.46009	4.43246	5.41452	5.30138	5.60868	5.83105	#NAME?	0.274624		0.598407	#NAME?	#NAME?		#NAME?	#NAME?
Q16637	Survival motor neuron protein	SMN1	1.04208	0.930354	-0.425571	0.697973	0.648451	1.00116	0.627341	1.26551	1.38785	1.64633	0.907423	1.641	#NAME?	0.52848		0.596834	#NAME?	#NAME?		#NAME?	#NAME?
Q9UK41	Vacuolar protein sorting-associated protein 28 homolog	VPS28	-0.687174	-1.60253	-1.84373	-2.64227	-2.22853	-1.96767	-0.665475	-0.714571	-1.91273	-1.48313	-1.4328	-0.739862	#NAME?	0.614633		0.670557	#NAME?	#NAME?		#NAME?	#NAME?
Q00613	Heat shock factor protein 1	HSF1	-1.52436	-1.30801	-2.04276	-2.50379	-2.00744	-2.14424	2.07877	-2.44753	-2.32376	-1.92895	1.11432	-1.33683	#NAME?	0.00532939		1.11444	#NAME?	#NAME?		#NAME?	#NAME?
Q96HA8	Protein N-terminal glutamine amidohydrolase	WDYHV1	-6.23278	-6.22895	-6.45021	-2.84506	-6.54409	-6.64461	-6.39117	-3.68156	-3.56751	-3.93234	-4.45154	-6.43561	#NAME?	0.831494		1.081	#NAME?	#NAME?		#NAME?	#NAME?
P42574	Caspase-3	CASP3	-0.808419	-0.56946	-0.626061	-0.521212	-1.58222	-0.337382	0.692733	-0.87789	-0.0330631	-0.280292	-0.135027	-0.282543	#NAME?	0.759726		0.588112	#NAME?	#NAME?		#NAME?	#NAME?
Q9UPN4	Centrosomal protein of 131 kDa	CEP131	-4.63757	-6.18504	-6.38777	-6.21805	-5.07813	-5.51658	-2.32946	-2.79538	-5.34369	-3.3998	-6.9004	-6.44998	#NAME?	0.0442892		1.13407	#NAME?	#NAME?		#NAME?	#NAME?
Q8WU10	Pyridine nucleotide-disulfide oxidoreductase domain-containing protein 1	PYROXD1	-1.57646	-6.28271	-6.47811	-5.24167	-6.52683	-4.11395	-6.42006	-0.750795	-4.44808	-2.4286	-6.88461	-0.573766	#NAME?	0.453848		1.4523	#NAME?	#NAME?		#NAME?	#NAME?
O60613	Selenoprotein F	SELENOF	-2.71244	-3.932	-3.37726	-4.44018	-4.54727	-4.14059	-2.13071	-3.12544	-3.5477	-2.9583	-4.33313	-2.54957	#NAME?	0.831544		0.750813	#NAME?	#NAME?		#NAME?	#NAME?
O14602	Eukaryotic translation initiation factor 1A, Y-chromosomal	EIF1AY	0.106758	-0.365423	1.3166	0.15499	-6.36785	-1.81539	0.528608	0.54624	-0.0227908	0.139623	0.143878	-0.27194	#NAME?	0.000214744		1.33899	#NAME?	#NAME?		#NAME?	#NAME?
P05546	Heparin cofactor 2	SERPIND1	0.886456	1.02647	-0.547239	1.16424	1.24778	1.47072	4.69649	1.10518	-0.190524	-0.333589	5.66012	2.04713	#NAME?	0.0162995		1.2894	#NAME?	#NAME?		#NAME?	#NAME?
O14657	Torsin-1B	TOR1B	-2.61593	-0.993531	-1.22513	-1.31708	-2.53964	-1.23528	-1.56877	-0.545748	-0.221694	-0.96379	-1.25575	-1.28239	#NAME?	0.449724		0.681408	#NAME?	#NAME?		#NAME?	#NAME?
Q9BY49	Peroxisomal trans-2-enoyl-CoA reductase	PECR	2.31501	2.38504	2.38136	2.53438	3.10147	2.47848	2.411	2.41064	3.17956	3.17483	3.51369	4.25535	#NAME?	0.0750628		0.624889	#NAME?	#NAME?		#NAME?	#NAME?
O94763	Unconventional prefoldin RPB5 interactor 1	URI1	-6.20993	-4.14564	-3.97391	-2.70217	-6.45913	-2.37008	-6.40736	-5.88796	0.360312	0.453984	-6.81338	1.02198	#NAME?	0.101364		1.43141	#NAME?	#NAME?		#NAME?	#NAME?
Q9BWM7	Sideroflexin-3	SFXN3	-0.969459	0.0122362	0.301963	-0.310921	0.848363	-4.28483	-0.0954263	-0.700208	0.353339	1.99321	0.316019	0.266505	#NAME?	0.139213		1.08935	#NAME?	#NAME?		#NAME?	#NAME?
Q92643	GPI-anchor transamidase	PIGK	-2.44062	-3.56617	-2.98778	-3.00512	-3.69738	-2.51992	-2.0074	-3.35802	-2.28923	-1.91157	-2.05305	-2.82828	#NAME?	0.838575		0.628238	#NAME?	#NAME?		#NAME?	#NAME?
O75367	Core histone macro-H2A.1	H2AFY	3.81544	3.85259	4.12195	3.83309	4.01575	4.21652	5.88373	3.87335	4.06829	4.35936	5.80113	4.23018	#NAME?	0.00224038		0.726782	#NAME?	#NAME?		#NAME?	#NAME?
P0DPK5	Putative histone H3.X	Putative	6.89049	6.9392	6.65251	6.91797	7.08973	6.80308	7.41777	6.73624	7.57164	7.40306	7.89074	7.10967	#NAME?	0.0472799		0.47269	#NAME?	#NAME?		#NAME?	#NAME?
Q9NV06	DDB1- and CUL4-associated factor 13	DCAF13	0.220471	-0.133572	0.358083	-0.05199	-0.0269945	0.254834	2.18489	0.323337	0.0349782	0.377522	3.30921	-0.103636	#NAME?	0.000603467		0.917579	#NAME?	#NAME?		#NAME?	#NAME?
O95872	G patch domain and ankyrin repeat-containing protein 1	GPANK1	0.651524	0.906776	0.702913	0.827049	0.995551	0.0824972	1.3317	0.457194	1.25951	1.30805	1.13684	1.12951	#NAME?	0.987232		0.409417	#NAME?	#NAME?		#NAME?	#NAME?
Q96CM3	Mitochondrial RNA pseudouridine synthase RPUSD4	RPUSD4	-1.41511	-2.55511	-2.31305	-6.35738	-6.62825	-6.4582	-6.55571	-1.276	-1.73733	-1.14923	-6.80623	-1.9115	#NAME?	0.836725		1.04852	#NAME?	#NAME?		#NAME?	#NAME?
P19838	Nuclear factor NF-kappa-B p105 subunit	NFKB1	-0.576661	-0.501312	0.296231	-0.871463	-0.846115	-1.04545	1.25599	-0.537909	-0.339612	-0.223327	0.472279	-0.256823	#NAME?	0.463155		0.652562	#NAME?	#NAME?		#NAME?	#NAME?
Q7L0Y3	tRNA methyltransferase 10 homolog C	TRMT10C	1.46282	0.903892	1.14398	1.39427	1.60279	1.38808	1.54202	1.42476	2.10959	1.62028	2.16953	1.63638	#NAME?	0.647693		0.434458	#NAME?	#NAME?		#NAME?	#NAME?
P42892	Endothelin-converting enzyme 1	ECE1	-3.11929	-1.78881	-2.58135	-0.800142	-2.9	-3.28952	-0.422395	-0.879086	-1.75302	-2.09744	-1.12041	-3.06843	#NAME?	0.994602		0.856386	#NAME?	#NAME?		#NAME?	#NAME?
Q9Y2U5	Mitogen-activated protein kinase kinase kinase 2	MAP3K2	-2.40559	-6.16332	-6.26882	-3.75227	-6.4684	-3.90079	-6.6229	-3.67367	-2.36256	-2.23066	-3.23959	-3.84767	#NAME?	0.892818		1.16369	#NAME?	#NAME?		#NAME?	#NAME?
Q8IYU8	Calcium uptake protein 2, mitochondrial	MICU2	-0.407845	-3.12189	-1.07075	-2.37197	-2.39662	-2.5898	-0.814552	-0.24628	-1.0339	-0.542028	-2.75107	-1.41488	#NAME?	0.753657		0.859362	#NAME?	#NAME?		#NAME?	#NAME?
O43583	Density-regulated protein	DENR	-2.37689	-1.77644	-2.33685	-1.9992	-3.41461	-2.75567	-0.79735	-2.64047	-1.38071	-1.84716	-1.19196	-2.58178	#NAME?	0.584202		0.703371	#NAME?	#NAME?		#NAME?	#NAME?
P11279	Lysosome-associated membrane glycoprotein 1	LAMP1	1.52465	1.75496	1.97161	2.715	2.46407	0.643532	3.21182	1.66053	2.34403	2.26624	4.11947	2.16521	#NAME?	0.694033		0.782247	#NAME?	#NAME?		#NAME?	#NAME?
Q9C0B1	Alpha-ketoglutarate-dependent dioxygenase FTO	FTO	-1.64691	-1.21692	-1.83063	-1.24389	-1.66046	-0.247535	-0.939254	-0.704984	0.154451	0.661611	-1.83348	-0.740069	#NAME?	0.377765		0.740772	#NAME?	#NAME?		#NAME?	#NAME?
P26196	Probable ATP-dependent RNA helicase DDX6	DDX6	1.0981	1.51017	1.84084	1.81862	-0.0238799	1.96685	0.920156	0.710975	2.39272	2.73634	3.06365	3.60441	#NAME?	0.348469		0.86959	#NAME?	#NAME?		#NAME?	#NAME?
O75923	Dysferlin	DYSF	-0.0994202	2.00548	4.04025	2.56474	-3.36532	2.22438	3.33613	2.54976	3.60106	2.92257	2.53139	0.257631	#NAME?	0.110181		1.30474	#NAME?	#NAME?		#NAME?	#NAME?
Q9Y6Y8	SEC23-interacting protein	SEC23IP	1.34323	1.35865	1.54271	2.05223	2.19857	1.74632	1.91313	1.75274	2.34848	2.53341	1.90735	3.08244	#NAME?	0.47763		0.549308	#NAME?	#NAME?		#NAME?	#NAME?
Q9Y3P9	Rab GTPase-activating protein 1	RABGAP1	-0.777509	-1.68975	-1.01526	-1.60382	-2.6524	-1.34219	-2.25274	-0.339089	-0.128229	0.106021	-2.18369	-0.111764	#NAME?	0.287031		0.69524	#NAME?	#NAME?		#NAME?	#NAME?
Q9NNW5	WD repeat-containing protein 6	WDR6	0.857904	0.490177	0.451058	0.118786	-0.310071	-0.128927	0.407205	1.24941	0.987678	0.87001	0.309024	0.777158	#NAME?	0.671217		0.520259	#NAME?	#NAME?		#NAME?	#NAME?
P53618	Coatomer subunit beta	COPB1	3.41377	4.29772	4.69229	3.77137	3.54063	3.86397	3.6767	4.03347	4.54043	4.65409	5.53709	5.00366	#NAME?	0.496495		0.644279	#NAME?	#NAME?		#NAME?	#NAME?
Q9BQ95	Evolutionarily conserved signaling intermediate in Toll pathway, mitochondrial	ECSIT	-1.33829	-2.37944	-4.48735	-2.33386	-1.60189	-2.39801	-3.3115	-0.785525	-1.26852	-0.723696	-3.25954	-1.03058	#NAME?	0.835074		0.693245	#NAME?	#NAME?		#NAME?	#NAME?
Q9UKM7	Endoplasmic reticulum mannosyl-oligosaccharide 1,2-alpha-mannosidase	MAN1B1	-2.90623	-1.73436	-2.69614	-3.56898	-2.49021	-3.48044	-3.01873	-2.05398	-2.3454	-2.10909	-1.87086	-1.57644	#NAME?	0.495717		0.650311	#NAME?	#NAME?		#NAME?	#NAME?
Q02790	Peptidyl-prolyl cis-trans isomerase FKBP4	FKBP4	3.57085	3.79886	2.33813	2.80908	3.06476	2.66137	4.34097	3.3687	3.43665	3.23628	4.64591	3.13159	#NAME?	0.776129		0.652841	#NAME?	#NAME?		#NAME?	#NAME?
Q9NY26	Zinc transporter ZIP1	SLC39A1	-6.14092	-5.96067	-6.81221	-6.41818	-6.10387	-7.63393	-6.44572	-5.46819	-5.80816	-5.14583	-5.90185	-6.45951	#NAME?	0.701383		0.640086	#NAME?	#NAME?		#NAME?	#NAME?
Q13144	Translation initiation factor eIF-2B subunit epsilon	EIF2B5	-0.948066	-0.488565	-0.323669	0.27064	-1.46781	0.198476	-1.27498	-0.731366	2.05434	2.09436	-0.863118	2.0889	#NAME?	0.0659202		1.02119	#NAME?	#NAME?		#NAME?	#NAME?
O00748	Cocaine esterase	CES2	2.12789	2.46191	2.0377	2.27004	2.4278	2.26168	2.70976	2.08109	2.84266	2.56334	2.83535	2.98944	#NAME?	0.167462		0.405769	#NAME?	#NAME?		#NAME?	#NAME?
Q14980	Nuclear mitotic apparatus protein 1	NUMA1	1.09516	0.521023	0.675865	0.791829	0.701749	0.428661	2.44651	1.06323	1.33959	1.0738	2.10925	0.218662	#NAME?	0.0167946		0.672792	#NAME?	#NAME?		#NAME?	#NAME?
Q6PJT7	Zinc finger CCCH domain-containing protein 14	ZC3H14	-0.907427	-1.53348	0.524938	-2.37266	-1.74272	-1.31407	0.126411	-1.32092	-0.522545	-0.338861	-0.21397	-0.563777	#NAME?	0.145553		0.751959	#NAME?	#NAME?		#NAME?	#NAME?
Q07065	Cytoskeleton-associated protein 4	CKAP4	3.95573	4.08542	3.86204	2.69733	3.05564	2.48179	2.54033	4.10611	4.53577	4.64142	3.67809	5.35388	#NAME?	0.49441		0.786274	#NAME?	#NAME?		#NAME?	#NAME?
O96000	NADH dehydrogenase [ubiquinone] 1 beta subcomplex subunit 10	NDUFB10	1.46729	1.29735	0.667269	1.45863	0.678478	0.924859	2.39332	1.44653	1.77846	1.4091	2.2389	0.752546	#NAME?	0.315534		0.587498	#NAME?	#NAME?		#NAME?	#NAME?
Q8NDX6	Zinc finger protein 740	ZNF740	-6.24603	-6.411	-6.32854	-5.52974	-4.07941	-6.48159	-6.57185	-5.88645	-2.69828	-2.8892	-3.95155	-6.68127	#NAME?	0.166244		1.06629	#NAME?	#NAME?		#NAME?	#NAME?
Q10469	Alpha-1,6-mannosyl-glycoprotein 2-beta-N-acetylglucosaminyltransferase	MGAT2	-0.493871	-1.34585	-0.732791	-0.913562	-2.25766	-0.922436	0.5425	-0.536884	-1.27704	-1.06175	1.41164	-0.939794	#NAME?	0.272784		0.800808	#NAME?	#NAME?		#NAME?	#NAME?
O00754	Lysosomal alpha-mannosidase	MAN2B1	3.07293	-1.29909	-1.34048	-1.11397	3.64204	-1.1502	-0.821538	3.12599	3.41633	2.31817	-0.390775	2.03728	#NAME?	0.55581		1.31237	#NAME?	#NAME?		#NAME?	#NAME?
O95782	AP-2 complex subunit alpha-1	AP2A1	3.01635	2.04224	1.71152	2.82541	1.67202	2.47217	1.82827	3.54248	3.54668	3.56965	1.72429	4.21459	#NAME?	0.216112		0.78104	#NAME?	#NAME?		#NAME?	#NAME?
Q9UPN9	E3 ubiquitin-protein ligase TRIM33	TRIM33	0.335956	-1.18493	-0.64368	-0.0709519	-0.244838	-0.414712	-1.22374	0.808049	1.25457	1.40885	-1.06148	1.17626	#NAME?	0.087158		0.764276	#NAME?	#NAME?		#NAME?	#NAME?
Q9NX08	COMM domain-containing protein 8	COMMD8	-2.46969	-6.44554	-3.26095	-3.39674	-6.61473	-2.60024	-1.94407	-2.35914	-3.48789	-3.92686	-2.88975	-3.78628	#NAME?	0.0831323		1.06565	#NAME?	#NAME?		#NAME?	#NAME?
O15400	Syntaxin-7	STX7	2.51828	2.12676	2.71985	2.44193	2.63502	2.18633	2.47628	2.61656	2.95025	2.816	3.3116	2.92866	#NAME?	0.672204		0.411864	#NAME?	#NAME?		#NAME?	#NAME?
Q03001	Dystonin	DST	-0.848722	-0.366763	-0.246838	-0.389714	-0.245558	-2.42004	-0.292382	0.139055	0.416887	0.559252	-1.09064	0.0956153	#NAME?	0.462751		0.724236	#NAME?	#NAME?		#NAME?	#NAME?
P11802	Cyclin-dependent kinase 4	CDK4	-4.26379	-4.34576	-6.41231	-5.89515	-6.77717	-6.6296	-2.41263	-4.35171	-5.53831	-5.78098	-3.5043	-6.57214	#NAME?	0.504782		1.02729	#NAME?	#NAME?		#NAME?	#NAME?
Q96EH3	Mitochondrial assembly of ribosomal large subunit protein 1	MALSU1	-2.63346	-1.82783	0.0117824	-2.99952	-3.09308	-2.72484	-1.75077	-1.65276	-2.41843	0.532286	-1.97291	-0.424588	#NAME?	0.899338		0.929965	#NAME?	#NAME?		#NAME?	#NAME?
Q9Y6A9	Signal peptidase complex subunit 1	SPCS1	2.74506	2.53203	1.95279	2.76257	2.67083	2.52907	2.99195	2.83809	2.77765	2.69514	3.14578	3.13378	#NAME?	0.330072		0.398339	#NAME?	#NAME?		#NAME?	#NAME?
P04004	Vitronectin	VTN	2.53625	2.0559	2.37109	2.04323	2.62792	3.12054	2.80369	2.15613	3.06446	3.08169	3.93653	3.20386	#NAME?	0.450016		0.581906	#NAME?	#NAME?		#NAME?	#NAME?
Q9UDY4	DnaJ homolog subfamily B member 4	DNAJB4	-0.0279149	-1.54899	-2.11097	-1.00538	-0.300449	-0.490009	2.59781	-0.46715	-1.34881	-0.682933	1.84284	-1.37861	#NAME?	0.121835		1.00781	#NAME?	#NAME?		#NAME?	#NAME?
P10301	Ras-related protein R-Ras	RRAS	-1.66641	-2.68456	-3.16168	-1.86387	-0.952447	-1.88292	-0.660829	-2.26514	-2.06296	-1.67755	-0.160276	-0.791284	#NAME?	0.856582		0.765642	#NAME?	#NAME?		#NAME?	#NAME?
P49411	Elongation factor Tu, mitochondrial	TUFM	5.73294	5.18914	5.27772	4.97825	5.83736	4.86144	5.78458	5.56807	5.67239	5.61976	6.14139	5.78483	#NAME?	0.175879		0.449029	#NAME?	#NAME?		#NAME?	#NAME?
P40692	DNA mismatch repair protein Mlh1	MLH1	-3.21369	-2.92279	-3.81861	-2.88012	-2.83944	-3.5056	-2.20176	-3.77535	-2.82265	-3.23924	1.02805	-3.02984	#NAME?	0.00573474		0.856576	#NAME?	#NAME?		#NAME?	#NAME?
Q92882	Osteoclast-stimulating factor 1	OSTF1	-0.160108	-0.0560583	0.38341	0.0868811	-1.09129	-0.118492	1.37658	0.551086	0.876326	0.48548	0.499245	-0.80962	#NAME?	0.427387		0.655793	#NAME?	#NAME?		#NAME?	#NAME?
Q9Y5S2	Serine/threonine-protein kinase MRCK beta	CDC42BPB	-1.19473	-3.42313	-2.35459	-3.12422	-1.64911	-3.13935	-2.78147	-1.06648	-1.6728	-1.8876	-1.54606	-1.53498	#NAME?	0.338902		0.732622	#NAME?	#NAME?		#NAME?	#NAME?
O14949	Cytochrome b-c1 complex subunit 8	UQCRQ	2.46832	2.40415	2.01898	1.90645	2.38138	1.28169	2.23741	2.64513	3.3402	2.8256	2.65024	2.05302	#NAME?	0.989708		0.54844	#NAME?	#NAME?		#NAME?	#NAME?
Q9ULX6	A-kinase anchor protein 8-like	AKAP8L	-1.18965	-1.23885	1.54616	-1.92648	-4.82733	-2.10654	2.6659	-0.907419	-0.648556	-1.17096	-0.12418	-2.26491	#NAME?	0.660911		1.21543	#NAME?	#NAME?		#NAME?	#NAME?
O15533	Tapasin	TAPBP	-6.29963	-2.19927	-1.45902	-2.07571	-6.44906	-2.39759	-1.28496	-2.11095	-2.98369	-2.38258	-2.52582	-2.60308	#NAME?	0.00955321		1.16487	#NAME?	#NAME?		#NAME?	#NAME?
Q9Y6E2	Basic leucine zipper and W2 domain-containing protein 2	BZW2	0.0907511	-0.373148	-0.792291	-0.877242	-1.3355	-0.343306	1.913	0.759118	0.604484	1.05844	-0.0539328	-2.37055	#NAME?	0.0339368		0.923549	#NAME?	#NAME?		#NAME?	#NAME?
O43772	Mitochondrial carnitine/acylcarnitine carrier protein	SLC25A20	1.48231	1.27189	1.4755	1.62214	1.55887	1.74387	1.23442	3.16902	2.75102	2.81036	0.880176	2.62913	#NAME?	0.00133965		0.719922	#NAME?	#NAME?		#NAME?	#NAME?
Q8N6S5	ADP-ribosylation factor-like protein 6-interacting protein 6	ARL6IP6	-1.53467	-2.70974	-2.10438	-2.5741	-1.91464	-3.05435	0.229639	-1.75843	-2.37146	-2.35502	0.159059	-2.64366	#NAME?	0.086868		0.858667	#NAME?	#NAME?		#NAME?	#NAME?
P35900	Keratin, type I cytoskeletal 20	KRT20	2.45256	-6.33451	0.721656	1.48811	-0.141909	-6.52231	-6.45917	2.36053	2.59875	2.54028	-6.96237	2.68468	#NAME?	0.702606		0.849849	#NAME?	#NAME?		#NAME?	#NAME?
Q9Y3B2	Exosome complex component CSL4	EXOSC1	0.893385	0.795962	0.776212	0.642146	-0.202181	1.19618	0.933656	1.0038	1.16307	1.02063	1.36613	1.5781	#NAME?	0.187111		0.493947	#NAME?	#NAME?		#NAME?	#NAME?
P03905	NADH-ubiquinone oxidoreductase chain 4	MT-ND4	0.134635	0.410266	0.190307	0.156892	0.0962687	0.243044	0.535189	0.294122	0.870398	0.279768	0.604013	0.587987	#NAME?	0.164259		0.323344	#NAME?	#NAME?		#NAME?	#NAME?
P26572	Alpha-1,3-mannosyl-glycoprotein 2-beta-N-acetylglucosaminyltransferase	MGAT1	-0.465789	-0.610874	-1.83257	-0.28479	-0.0235649	-0.555895	0.375342	-0.960972	-0.205204	0.208238	0.910684	-0.162991	#NAME?	0.984913		0.656431	#NAME?	#NAME?		#NAME?	#NAME?
Q13098	COP9 signalosome complex subunit 1	GPS1	0.0433273	-0.99541	-1.20591	-0.022272	-1.62631	0.142561	0.873605	-0.941089	0.979433	0.69256	0.042748	-0.797093	#NAME?	0.810121		0.752363	#NAME?	#NAME?		#NAME?	#NAME?
Q9H116	GDNF-inducible zinc finger protein 1	GZF1	-1.26841	-3.31941	-1.85838	-1.73865	-1.62371	-2.2266	-1.45954	-1.49938	-1.47461	-1.15244	-0.420313	-2.08047	#NAME?	0.566211		0.658065	#NAME?	#NAME?		#NAME?	#NAME?
Q9Y2I8	WD repeat-containing protein 37	WDR37	-1.31622	-4.28083	-6.49602	-4.06789	-5.41653	-4.90633	-0.49449	-4.6917	-4.14798	-4.5888	0.868584	-5.46727	#NAME?	0.402148		1.32703	#NAME?	#NAME?		#NAME?	#NAME?
O94913	Pre-mRNA cleavage complex 2 protein Pcf11	PCF11	-3.59876	-3.57274	-1.79145	-3.64129	-6.39772	-6.45001	1.34845	-4.52443	-4.45023	-4.67957	1.65683	-5.69444	#NAME?	0.220288		1.5181	#NAME?	#NAME?		#NAME?	#NAME?
P57105	Synaptojanin-2-binding protein	SYNJ2BP	-0.315913	-0.669051	-0.625406	-0.811362	-0.0698597	-0.627385	-0.100783	-0.00816591	-0.394836	0.448844	-0.00273383	-0.461266	#NAME?	0.703378		0.433339	#NAME?	#NAME?		#NAME?	#NAME?
Q8WXI4	Acyl-coenzyme A thioesterase 11	ACOT11	-3.1809	-6.36269	-6.32685	-6.36802	-6.60925	-6.6329	-4.28956	-3.27684	-4.05604	-6.3479	-6.06208	-5.57427	#NAME?	0.854433		0.978987	#NAME?	#NAME?		#NAME?	#NAME?
Q02218	2-oxoglutarate dehydrogenase, mitochondrial	OGDH	0.700431	1.95777	0.654651	-0.40652	2.01851	1.7157	1.24075	0.968016	1.82104	2.33933	3.27886	1.76378	#NAME?	0.755922		0.795204	#NAME?	#NAME?		#NAME?	#NAME?
A6NIH7	Protein unc-119 homolog B	UNC119B	-1.52988	-1.79137	-0.689149	-3.52462	-2.45926	-3.99934	-1.34096	-1.35522	-1.44019	-2.17265	-2.36569	-1.4599	#NAME?	0.0444826		0.643171	#NAME?	#NAME?		#NAME?	#NAME?
Q96AZ6	Interferon-stimulated gene 20 kDa protein	ISG20	-4.00732	-0.840237	-2.82026	-2.59288	-3.9466	-2.08244	-1.20295	-4.4382	0.225709	0.40383	-0.640657	-3.82722	#NAME?	0.252078		1.13504	#NAME?	#NAME?		#NAME?	#NAME?
Q9BUJ2	Heterogeneous nuclear ribonucleoprotein U-like protein 1	HNRNPUL1	2.49814	2.43849	2.87979	2.64406	2.64747	2.77983	1.08449	3.79625	5.08141	3.94206	2.77547	4.53497	#NAME?	0.000218056		0.887811	#NAME?	#NAME?		#NAME?	#NAME?
Q15035	Translocating chain-associated membrane protein 2	TRAM2	0.156204	-1.07844	-0.644502	-0.355731	-1.439	-1.83332	0.622338	-0.640685	0.404707	-0.487632	0.19708	-1.12677	#NAME?	0.887112		0.69397	#NAME?	#NAME?		#NAME?	#NAME?
A5PLL7	Transmembrane protein 189	TMEM189	-1.42995	-0.831063	-1.16679	-0.958921	-0.909063	-0.97426	-1.19845	-1.25747	-0.189311	0.154582	-0.0258505	0.0778786	#NAME?	0.0328091		0.638572	#NAME?	#NAME?		#NAME?	#NAME?
Q96Q15	Serine/threonine-protein kinase SMG1	SMG1	-2.84198	-3.94777	-4.79076	-3.22964	-6.3334	-1.6454	-2.917	-1.82365	-2.64288	-1.17339	-4.80647	-3.19264	#NAME?	0.572694		1.03882	#NAME?	#NAME?		#NAME?	#NAME?
O95772	STARD3 N-terminal-like protein	STARD3NL	-2.13781	-6.28921	-6.51704	-6.40131	-2.41197	-6.61764	-2.8434	-3.19035	-2.70432	-2.88565	-6.86745	-2.93973	#NAME?	0.542639		1.49068	#NAME?	#NAME?		#NAME?	#NAME?
Q86XP3	ATP-dependent RNA helicase DDX42	DDX42	0.124141	0.538847	-0.129583	0.502312	0.259811	0.298619	1.69464	0.445808	0.548594	0.656663	2.79417	-0.0518675	#NAME?	0.00682413		0.748977	#NAME?	#NAME?		#NAME?	#NAME?
Q6Y1H2	Very-long-chain (3R)-3-hydroxyacyl-CoA dehydratase 2	HACD2	1.01346	0.723963	0.506879	0.542752	0.563307	0.00970694	0.727311	0.992772	1.40862	1.13217	1.53309	0.454726	#NAME?	0.646438		0.481436	#NAME?	#NAME?		#NAME?	#NAME?
P08183	ATP-dependent translocase ABCB1	ABCB1	2.09684	1.63707	1.87868	1.79064	2.55394	1.81367	1.83839	2.2335	2.88934	2.90202	1.99337	3.1277	#NAME?	0.288542		0.535579	#NAME?	#NAME?		#NAME?	#NAME?
O43464	Serine protease HTRA2, mitochondrial	HTRA2	-0.122716	-0.376962	-0.234997	-0.144331	0.289765	-0.0614942	0.53932	0.271594	0.936192	0.985991	-1.62813	0.949737	#NAME?	0.00497675		0.450907	#NAME?	#NAME?		#NAME?	#NAME?
Q96S97	Myeloid-associated differentiation marker	MYADM	0.872867	0.851482	1.00078	0.827797	0.971719	0.650497	0.663321	1.08748	1.58416	1.35016	1.43436	1.62089	#NAME?	0.0351894		0.427539	#NAME?	#NAME?		#NAME?	#NAME?
O14617	AP-3 complex subunit delta-1	AP3D1	-0.168831	-0.166334	-0.172943	-0.353764	-0.132645	-1.27237	3.85381	-0.100497	-0.867588	-0.358109	3.42992	-1.39318	#NAME?	0.0027047		1.13854	#NAME?	#NAME?		#NAME?	#NAME?
O94880	PHD finger protein 14	PHF14	-2.99352	-6.20242	-2.34786	-6.30922	-2.80824	-6.41026	-0.967624	-4.30833	-3.33778	-3.70614	-0.716716	-6.47283	#NAME?	0.851645		1.26035	#NAME?	#NAME?		#NAME?	#NAME?
Q13127	RE1-silencing transcription factor	REST	-3.85888	-6.38209	-6.51719	-6.26581	-0.478364	-6.48692	-3.38426	-4.35477	-3.80379	-3.65444	-3.33468	-6.60142	#NAME?	0.162495		0.809315	#NAME?	#NAME?		#NAME?	#NAME?
P05413	Fatty acid-binding protein, heart	FABP3	-3.39436	-2.87054	-3.26556	-3.01349	-2.53729	-3.1507	2.44526	-5.1509	-3.67964	-4.44831	2.01935	-4.56342	#NAME?	5.55222e-05		0.809046	#NAME?	#NAME?		#NAME?	#NAME?
Q92597	Protein NDRG1	NDRG1	4.76105	4.4157	4.39791	4.61193	5.26108	4.72414	5.16235	4.53815	5.10086	5.21289	5.79816	5.18447	#NAME?	0.616262		0.470847	#NAME?	#NAME?		#NAME?	#NAME?
Q86VN1	Vacuolar protein-sorting-associated protein 36	VPS36	-0.281263	-2.86371	-2.72635	-1.83527	-0.359171	-2.37755	-0.963622	-2.67169	-0.224726	-0.589622	-0.659031	-0.492846	#NAME?	0.570792		0.806964	#NAME?	#NAME?		#NAME?	#NAME?
P29122	Proprotein convertase subtilisin/kexin type 6	PCSK6	0.689394	1.21225	-0.384732	0.818018	0.928999	-0.0216503	0.621425	1.25905	1.52127	1.20363	1.79401	0.472113	#NAME?	0.701906		0.604868	#NAME?	#NAME?		#NAME?	#NAME?
Q7Z5L7	Podocan	PODN	-0.781552	-6.34503	-6.54772	-6.33629	-6.53864	-6.39551	-6.53527	-2.00022	-6.31877	-2.73375	-6.93207	0.213621	#NAME?	0.599961		1.43971	#NAME?	#NAME?		#NAME?	#NAME?
Q8N0Y2	Zinc finger protein 444	ZNF444	-6.0843	-6.20098	-3.41448	-6.2609	-6.6136	-6.48713	-1.37137	-6.00195	-6.48969	-6.30369	-2.07629	-6.42508	#NAME?	0.161252		1.06555	#NAME?	#NAME?		#NAME?	#NAME?
Q5UIP0	Telomere-associated protein RIF1	RIF1	-0.917077	-0.998029	-2.90447	-1.60336	-1.97556	-2.4611	-0.298825	-1.35474	-1.44188	-1.36722	-0.786354	-1.6439	#NAME?	0.343686		0.661113	#NAME?	#NAME?		#NAME?	#NAME?
P18440	Arylamine N-acetyltransferase 1	NAT1	-3.43877	-3.52358	-2.77106	-3.72217	-2.83536	-3.08686	-3.1212	-2.67176	-2.55265	-2.14244	-3.3236	-2.54575	#NAME?	0.838401		0.503401	#NAME?	#NAME?		#NAME?	#NAME?
P21980	Protein-glutamine gamma-glutamyltransferase 2	TGM2	2.45239	1.52882	1.24612	1.12431	2.17848	1.58907	0.593463	3.11072	3.31564	3.10105	1.21076	3.70728	#NAME?	0.0728199		0.819955	#NAME?	#NAME?		#NAME?	#NAME?
Q9P281	BAH and coiled-coil domain-containing protein 1	BAHCC1	5.71035	5.14903	4.61965	4.49315	5.06795	3.27298	5.73322	5.53331	5.45403	5.38323	5.03032	5.11564	#NAME?	0.0247391		0.656106	#NAME?	#NAME?		#NAME?	#NAME?
Q93008	Probable ubiquitin carboxyl-terminal hydrolase FAF-X	USP9X	-2.07988	-1.04674	-1.07065	-0.531708	-1.58996	-0.815997	3.47063	-1.92766	-0.854745	-1.51749	3.97782	-1.60799	#NAME?	0.00346446		1.44592	#NAME?	#NAME?		#NAME?	#NAME?
P10606	Cytochrome c oxidase subunit 5B, mitochondrial	COX5B	6.62373	4.34472	4.40216	4.26843	6.66589	4.28172	4.33361	6.302	6.86317	6.96843	4.36962	7.4947	#NAME?	0.77396		0.957481	#NAME?	#NAME?		#NAME?	#NAME?
O15523	ATP-dependent RNA helicase DDX3Y	DDX3Y	0.339582	0.122056	0.584473	0.0340438	0.840147	0.197972	0.24785	0.4178	0.993386	1.17572	0.781092	1.39553	#NAME?	0.441187		0.482184	#NAME?	#NAME?		#NAME?	#NAME?
O60306	RNA helicase aquarius	AQR	1.65294	-0.690822	0.615262	-1.08464	2.00975	-1.04413	-0.490755	1.55653	1.55219	1.53215	1.64702	1.13281	#NAME?	0.283658		0.911929	#NAME?	#NAME?		#NAME?	#NAME?
P32856	Syntaxin-2	STX2	3.12174	3.50721	-6.35221	2.68739	3.1536	3.29782	1.61391	3.15028	4.16273	4.23662	0.742939	4.65466	#NAME?	0.0712773		1.52427	#NAME?	#NAME?		#NAME?	#NAME?
Q9NS86	LanC-like protein 2	LANCL2	-1.30681	-3.50089	-1.43625	-3.20313	-4.90062	-2.38681	-1.53377	-3.05951	-1.62674	-1.32453	-1.23695	-2.69117	#NAME?	0.232104		0.876974	#NAME?	#NAME?		#NAME?	#NAME?
O94973	AP-2 complex subunit alpha-2	AP2A2	4.00098	3.43263	3.87941	3.56615	3.68859	3.71537	3.63103	3.91737	4.11252	4.07168	5.21719	4.34788	#NAME?	0.0519668		0.50242	#NAME?	#NAME?		#NAME?	#NAME?
Q5J8M3	ER membrane protein complex subunit 4	EMC4	-0.681704	-0.0243844	-0.151654	-0.233764	-0.758893	0.0479648	1.03968	0.73511	-0.886763	-0.0558016	0.796353	0.143009	#NAME?	0.1305		0.595671	#NAME?	#NAME?		#NAME?	#NAME?
Q9BY77	Polymerase delta-interacting protein 3	POLDIP3	2.16617	1.42082	0.823171	1.55173	2.40848	1.36866	1.8669	2.26482	1.93284	2.01541	3.0925	1.81186	#NAME?	0.702625		0.540885	#NAME?	#NAME?		#NAME?	#NAME?
Q96G21	U3 small nucleolar ribonucleoprotein protein IMP4	IMP4	1.64174	1.20892	1.44683	1.14535	1.18575	0.939571	0.902355	1.74694	1.68579	1.71481	1.90209	1.93807	#NAME?	0.366519		0.386986	#NAME?	#NAME?		#NAME?	#NAME?
Q8N6T7	NAD-dependent protein deacetylase sirtuin-6	SIRT6	-6.17196	-3.10973	-3.85873	-3.04928	-6.34478	-6.50222	-2.19707	-3.01176	-3.40949	-6.19313	-3.92827	-4.04624	#NAME?	0.653776		1.04179	#NAME?	#NAME?		#NAME?	#NAME?
Q9HCG7	Non-lysosomal glucosylceramidase	GBA2	-1.46983	-3.1428	-5.19669	-4.0363	-1.76694	-6.01632	-1.95193	-2.94678	-2.44882	-2.45987	-1.79067	-4.03588	#NAME?	0.0997427		0.999153	#NAME?	#NAME?		#NAME?	#NAME?
Q9NZL9	Methionine adenosyltransferase 2 subunit beta	MAT2B	1.72594	1.3702	0.376844	1.59531	1.37286	1.98187	1.5434	2.02787	2.05061	1.90208	1.73279	2.22303	#NAME?	0.0963715		0.509457	#NAME?	#NAME?		#NAME?	#NAME?
P35579	Myosin-9	MYH9	1.0768	2.28568	2.68837	2.04178	1.40639	2.14851	5.85001	0.995148	2.05798	1.79123	5.4624	1.90168	#NAME?	0.0153912		1.06849	#NAME?	#NAME?		#NAME?	#NAME?
Q96GQ7	Probable ATP-dependent RNA helicase DDX27	DDX27	3.57733	-0.371343	-0.4337	-0.567769	3.56927	-0.415177	0.458609	3.98279	2.80783	2.51422	0.0735866	2.38086	#NAME?	0.481786		1.14322	#NAME?	#NAME?		#NAME?	#NAME?
Q8TB52	F-box only protein 30	FBXO30	-4.27254	-4.15598	-4.61577	-2.90649	-4.62131	-3.18294	-1.27349	-4.24689	-2.33718	-2.97852	-1.5218	-5.67993	#NAME?	0.0918263		0.952869	#NAME?	#NAME?		#NAME?	#NAME?
Q8N1P7	Beta/gamma crystallin domain-containing protein 2	CRYBG2	-5.32293	-4.24514	-6.49387	-5.21307	-5.46421	-6.51065	-6.3379	-4.31475	-3.76496	-3.88679	-6.97606	-1.93028	#NAME?	0.11823		1.00652	#NAME?	#NAME?		#NAME?	#NAME?
Q9P2X0	Dolichol-phosphate mannosyltransferase subunit 3	DPM3	0.533307	0.757272	0.563202	0.634793	-1.42676	-0.151039	0.485517	0.605454	1.12799	0.749299	1.35599	0.437054	#NAME?	0.0985704		0.641757	#NAME?	#NAME?		#NAME?	#NAME?
Q9GZR7	ATP-dependent RNA helicase DDX24	DDX24	0.422758	0.434457	0.216954	0.401944	-2.71865	0.644634	0.409804	0.898731	0.518503	0.778245	0.778636	0.907407	#NAME?	0.00101194		0.814872	#NAME?	#NAME?		#NAME?	#NAME?
O00458	Interferon-related developmental regulator 1	IFRD1	-1.61442	-2.5311	-1.90761	-2.52456	-2.35781	-2.19399	-2.9247	-1.5351	-0.647629	-0.767699	-1.69895	-1.74685	#NAME?	0.0996484		0.634759	#NAME?	#NAME?		#NAME?	#NAME?
Q8WUR7	UPF0235 protein C15orf40	C15orf40	-3.20805	-3.19709	-3.34299	-1.56741	-2.60185	-3.29996	2.64778	-3.02292	-3.4869	-3.5945	2.94375	-4.31249	#NAME?	0.00362638		1.39868	#NAME?	#NAME?		#NAME?	#NAME?
Q8TAA5	GrpE protein homolog 2, mitochondrial	GRPEL2	-1.17246	-0.867248	-1.71099	-2.71891	-3.19222	-6.60001	-2.83535	-0.847292	-1.10597	-0.135444	-6.96578	-0.34785	#NAME?	0.655852		0.670691	#NAME?	#NAME?		#NAME?	#NAME?
O75477	Erlin-1	ERLIN1	3.0844	3.40717	2.49779	3.53719	3.85126	3.26311	4.06596	3.03323	3.66873	3.71426	5.01025	3.69265	#NAME?	0.459926		0.590694	#NAME?	#NAME?		#NAME?	#NAME?
P16591	Tyrosine-protein kinase Fer	FER	-5.45172	-1.98373	-2.08559	-1.72901	-2.29529	-0.521775	-2.09855	-1.90224	-0.840819	-0.397788	-2.70168	-0.32434	#NAME?	0.288934		0.966951	#NAME?	#NAME?		#NAME?	#NAME?
Q3B726	DNA-directed RNA polymerase I subunit RPA43	TWISTNB	-2.27765	-1.98561	-3.80018	-3.0242	-3.42002	-6.39247	-1.95103	-2.69236	-3.15256	-2.40989	-1.91858	-3.37457	#NAME?	0.0553311		0.900191	#NAME?	#NAME?		#NAME?	#NAME?
P30101	Protein disulfide-isomerase A3	PDIA3	6.49495	6.66634	6.67468	6.54127	6.83008	6.56954	7.04515	6.58365	6.94416	6.84076	7.37684	6.98493	#NAME?	0.118492		0.333105	#NAME?	#NAME?		#NAME?	#NAME?
P17152	Transmembrane protein 11, mitochondrial	TMEM11	-0.498761	-1.10445	-0.583938	-0.622827	-0.81848	-0.79607	-0.502866	-0.0598634	-0.608944	-0.767688	0.00349918	-0.118442	#NAME?	0.404005		0.395037	#NAME?	#NAME?		#NAME?	#NAME?
P50053	Ketohexokinase	KHK	0.979877	1.84455	1.28788	1.48648	1.7481	1.79093	2.08641	1.42865	1.98429	1.9994	1.89201	2.29531	#NAME?	0.728886		0.424709	#NAME?	#NAME?		#NAME?	#NAME?
P49069	Calcium signal-modulating cyclophilin ligand	CAMLG	-3.06647	-3.05669	-6.54071	-2.75456	-4.10125	-6.54058	-4.20136	-2.21215	-2.71457	-3.31588	-4.02189	-3.79904	#NAME?	0.0999339		0.965896	#NAME?	#NAME?		#NAME?	#NAME?
O43707	Alpha-actinin-4	ACTN4	4.35898	3.61619	3.7502	3.91347	4.27519	3.05475	6.73982	4.29592	3.96982	4.02118	7.40489	2.4859	#NAME?	0.00942332		0.991457	#NAME?	#NAME?		#NAME?	#NAME?
Q9BVG4	Protein PBDC1	PBDC1	2.2161	2.08467	1.75089	1.95034	0.545249	2.09344	2.47623	2.04921	2.31946	2.31281	2.31318	2.44638	#NAME?	0.00743176		0.546098	#NAME?	#NAME?		#NAME?	#NAME?
O15027	Protein transport protein Sec16A	SEC16A	1.87132	1.39745	-3.12751	2.14734	2.50912	-2.61696	-0.901242	1.54605	2.42056	2.48442	-0.913107	2.72762	#NAME?	0.400553		0.863925	#NAME?	#NAME?		#NAME?	#NAME?
Q13190	Syntaxin-5	STX5	-0.737282	-0.571822	0.752636	-0.746168	-0.573538	-0.947774	-0.389099	1.92641	1.56118	-0.0480269	-0.739962	-0.503281	#NAME?	0.198647		0.771862	#NAME?	#NAME?		#NAME?	#NAME?
Q05655	Protein kinase C delta type	PRKCD	-1.20091	-0.733539	-2.65064	-1.61636	-1.1435	-2.71158	-1.95973	-0.778581	-0.116362	-0.216189	-2.35765	0.0255971	#NAME?	0.65749		0.775601	#NAME?	#NAME?		#NAME?	#NAME?
Q8N335	Glycerol-3-phosphate dehydrogenase 1-like protein	GPD1L	-3.34863	-5.4013	-2.83351	-6.59811	-5.1825	-6.62057	-6.34349	-2.57569	-3.43667	-2.92826	-6.84683	-2.69409	#NAME?	0.687993		0.859931	#NAME?	#NAME?		#NAME?	#NAME?
Q8NC42	E3 ubiquitin-protein ligase RNF149	RNF149	-2.24436	-2.81958	-2.2158	-2.35191	-3.44788	-2.6987	-1.9469	-2.88571	-2.2894	-1.93492	-2.00596	-1.61727	#NAME?	0.865967		0.516343	#NAME?	#NAME?		#NAME?	#NAME?
O95251	Histone acetyltransferase KAT7	KAT7	-0.103571	-0.0943427	0.176194	-0.0870906	-0.0104985	0.0803161	0.0599434	0.372556	0.4928	0.285144	0.962375	0.109182	#NAME?	0.0364275		0.386832	#NAME?	#NAME?		#NAME?	#NAME?
Q9Y5K6	CD2-associated protein	CD2AP	0.662959	-0.458703	-0.342558	0.183542	-0.464029	0.456749	1.51211	0.650354	2.2019	1.16673	-1.29338	0.385824	#NAME?	0.0747509		0.764265	#NAME?	#NAME?		#NAME?	#NAME?
Q9NX57	Ras-related protein Rab-20	RAB20	-1.82002	-2.3263	-2.96203	-2.1989	-1.04749	-2.82062	-1.96769	-2.12156	-1.37331	-1.37424	-1.90081	-0.799731	#NAME?	0.47154		0.606337	#NAME?	#NAME?		#NAME?	#NAME?
Q96SI9	Spermatid perinuclear RNA-binding protein	STRBP	-1.81382	0.174208	-3.361	-1.60064	-1.04561	-1.16526	0.330122	0.423982	-1.359	-1.92973	-0.19665	-1.09316	#NAME?	0.700719		0.831284	#NAME?	#NAME?		#NAME?	#NAME?
P35218	Carbonic anhydrase 5A, mitochondrial	CA5A	-0.595357	-1.85312	-3.43956	-3.3797	-1.36482	-3.2814	-0.932265	-0.414182	-2.48244	-1.9165	-1.95549	-1.36477	#NAME?	0.32063		0.808057	#NAME?	#NAME?		#NAME?	#NAME?
O75688	Protein phosphatase 1B	PPM1B	-0.488142	0.0934845	-0.415929	0.477848	-0.623671	0.365697	2.56729	0.219282	-0.611784	0.95434	1.11327	-0.340242	#NAME?	0.0699949		0.748812	#NAME?	#NAME?		#NAME?	#NAME?
Q68D91	Metallo-beta-lactamase domain-containing protein 2	MBLAC2	-1.12771	-2.06682	-2.51031	-1.99848	-1.67133	-1.81973	-1.06353	-0.640657	-1.17732	-1.9859	-1.76842	-1.39851	#NAME?	0.896272		0.526676	#NAME?	#NAME?		#NAME?	#NAME?
Q8N2U9	Solute carrier family 66 member 2	SLC66A2	-3.36186	-2.37718	-2.98405	-3.68213	-3.28022	-2.98887	-2.27101	-3.26905	-2.29121	-2.23262	-3.39762	-1.76079	#NAME?	0.426256		0.575336	#NAME?	#NAME?		#NAME?	#NAME?
Q66K74	Microtubule-associated protein 1S	MAP1S	-3.04679	-2.51909	-2.05909	-2.49099	-3.70141	-4.31238	-1.56182	-2.12526	-2.81533	-3.82667	-0.700397	-2.39354	#NAME?	0.622138		0.784455	#NAME?	#NAME?		#NAME?	#NAME?
Q6ZN17	Protein lin-28 homolog B	LIN28B	0.230123	-0.332465	-1.50169	-0.534344	0.489775	-1.11282	1.78271	-0.384552	-0.358921	-0.442186	1.46046	-0.437955	#NAME?	0.497409		0.730161	#NAME?	#NAME?		#NAME?	#NAME?
P05787	Keratin, type II cytoskeletal 8	KRT8	7.48247	7.68992	7.37676	7.78523	7.85015	7.80767	7.87846	7.54596	8.18096	7.80164	9.02111	8.59795	#NAME?	0.0379357		0.505649	#NAME?	#NAME?		#NAME?	#NAME?
P33897	ATP-binding cassette sub-family D member 1	ABCD1	-4.86711	-1.61798	-0.724047	-0.96505	-0.442705	-0.734027	-0.937243	-4.86177	1.5629	1.19516	-0.647105	1.61118	#NAME?	0.406236		1.21234	#NAME?	#NAME?		#NAME?	#NAME?
P50213	Isocitrate dehydrogenase [NAD] subunit alpha, mitochondrial	IDH3A	2.01263	2.52818	2.23727	2.37554	2.32864	1.96716	3.01246	2.42249	2.9318	2.23555	3.13292	2.25809	#NAME?	0.197144		0.423981	#NAME?	#NAME?		#NAME?	#NAME?
Q92615	La-related protein 4B	LARP4B	-2.32687	-1.21858	-2.14744	-1.677	-1.92428	-1.98017	0.520033	-1.58677	-2.25792	-1.67401	0.931701	-2.20422	#NAME?	0.0138345		0.83386	#NAME?	#NAME?		#NAME?	#NAME?
Q86X83	COMM domain-containing protein 2	COMMD2	-0.804212	-1.77264	-1.72856	-1.7009	-0.671404	-2.51951	-1.19	-1.1892	-0.70645	-0.486102	-1.75719	-0.172765	#NAME?	0.695121		0.61592	#NAME?	#NAME?		#NAME?	#NAME?
Q99442	Translocation protein SEC62	SEC62	0.245047	0.728395	0.778175	0.727486	0.328556	0.62863	1.30659	0.463521	1.21261	1.0615	1.27393	0.580006	#NAME?	0.315463		0.410312	#NAME?	#NAME?		#NAME?	#NAME?
P00367	Glutamate dehydrogenase 1, mitochondrial	GLUD1	6.91146	6.39726	6.61071	6.77804	6.8267	6.45585	7.07807	6.74009	6.84626	6.84765	7.75294	6.86663	#NAME?	0.225045		0.358604	#NAME?	#NAME?		#NAME?	#NAME?
Q52LJ0	Protein FAM98B	FAM98B	2.00945	1.97417	1.01824	1.21573	1.27163	1.06287	1.59859	1.93894	2.05182	2.14113	1.65299	1.82722	#NAME?	0.134998		0.443097	#NAME?	#NAME?		#NAME?	#NAME?
P30038	Delta-1-pyrroline-5-carboxylate dehydrogenase, mitochondrial	ALDH4A1	5.39398	5.07645	5.20731	5.47746	5.87199	5.21129	5.49355	5.32992	5.81275	5.70969	6.44421	6.09185	#NAME?	0.450783		0.440582	#NAME?	#NAME?		#NAME?	#NAME?
P36578	60S ribosomal protein L4	RPL4	5.09043	5.19209	5.04939	5.13075	5.00484	4.97512	5.35494	5.18288	5.15675	5.36185	5.38039	5.26662	#NAME?	0.69617		0.210137	#NAME?	#NAME?		#NAME?	#NAME?
P32969	60S ribosomal protein L9	RPL9	4.93831	4.61509	4.42769	4.21433	4.23246	3.47416	5.46734	4.51578	4.71342	4.58463	5.42082	4.36355	#NAME?	0.948907		0.52725	#NAME?	#NAME?		#NAME?	#NAME?
Q7L2J0	7SK snRNA methylphosphate capping enzyme	MEPCE	-1.49553	-1.62651	-2.52047	-2.60534	-1.70775	-4.26207	-2.02098	-1.53082	-1.48632	-0.430032	-2.51207	-1.80247	#NAME?	0.400127		0.739164	#NAME?	#NAME?		#NAME?	#NAME?
Q8TCT8	Signal peptide peptidase-like 2A	SPPL2A	-0.818733	-1.31199	-2.16325	-2.39894	-6.61503	-2.72503	-1.31228	-0.977216	-2.31915	-2.54057	-1.9903	-0.721061	#NAME?	0.0440224		1.02873	#NAME?	#NAME?		#NAME?	#NAME?
P43897	Elongation factor Ts, mitochondrial	TSFM	2.08036	1.09704	1.56483	1.68619	1.82286	1.20874	1.48652	1.8143	2.08032	2.25256	2.04577	2.41346	#NAME?	0.792285		0.438816	#NAME?	#NAME?		#NAME?	#NAME?
Q9P015	39S ribosomal protein L15, mitochondrial	MRPL15	2.81292	2.75202	2.47632	2.37587	2.77612	2.58335	3.71522	2.56322	3.35595	3.75742	3.11866	2.35468	#NAME?	0.0212316		0.514761	#NAME?	#NAME?		#NAME?	#NAME?
O94923	D-glucuronyl C5-epimerase	GLCE	-6.13936	-4.2532	-3.12142	-3.91802	-3.01698	-3.47377	-3.47134	-2.86254	-4.24379	-3.46687	-2.44893	-2.87475	#NAME?	0.215101		0.759087	#NAME?	#NAME?		#NAME?	#NAME?
Q9BRX5	DNA replication complex GINS protein PSF3	GINS3	-2.03553	-2.1887	-1.7544	-1.87394	-1.47852	-1.72528	3.3693	-2.88968	-1.97826	-2.02099	3.44366	-3.25206	#NAME?	3.56512e-05		1.28806	#NAME?	#NAME?		#NAME?	#NAME?
Q9UKR5	Probable ergosterol biosynthetic protein 28	ERG28	0.65234	0.972571	1.01814	0.715862	1.44109	1.05621	1.2168	0.998712	1.48815	1.81277	1.63409	1.11614	#NAME?	0.797856		0.401742	#NAME?	#NAME?		#NAME?	#NAME?
Q12800	Alpha-globin transcription factor CP2	TFCP2	-1.00387	-1.50167	-1.54502	-1.30989	-0.760363	-0.599395	-0.0595135	-0.936567	-0.870677	-1.14085	0.783045	-0.958716	#NAME?	0.18732		0.589488	#NAME?	#NAME?		#NAME?	#NAME?
Q96EY1	DnaJ homolog subfamily A member 3, mitochondrial	DNAJA3	1.59865	1.74634	1.75512	2.04545	2.09866	2.06179	2.16365	1.6691	2.50814	2.30355	2.90818	2.26594	#NAME?	0.172047		0.418757	#NAME?	#NAME?		#NAME?	#NAME?
Q8WWH5	Probable tRNA pseudouridine synthase 1	TRUB1	1.76929	-1.17225	-1.54403	2.27485	-0.408866	-0.969857	-0.805604	1.86414	1.88489	1.89602	-1.46442	1.4157	#NAME?	0.892217		0.806933	#NAME?	#NAME?		#NAME?	#NAME?
Q9H8H3	Methyltransferase-like protein 7A	METTL7A	3.38177	3.45004	3.14966	3.16107	2.52051	3.36544	5.36868	3.17403	3.23437	3.32421	6.37357	3.14436	#NAME?	0.00748		0.931788	#NAME?	#NAME?		#NAME?	#NAME?
Q9UBS4	DnaJ homolog subfamily B member 11	DNAJB11	2.20369	1.4946	2.1987	1.24461	-1.12636	2.39816	1.88086	2.12976	1.79211	2.8126	1.6863	2.82642	#NAME?	0.0576252		0.785773	#NAME?	#NAME?		#NAME?	#NAME?
P02774	Vitamin D-binding protein	GC	-4.55346	-4.69494	-6.50148	-3.49655	-6.40301	-3.80199	-4.52462	-3.92836	-2.72914	-2.81235	-7.00779	-2.52194	#NAME?	0.54347		0.987871	#NAME?	#NAME?		#NAME?	#NAME?
P40425	Pre-B-cell leukemia transcription factor 2	PBX2	-4.52818	-6.43293	-6.28542	-5.76391	-6.42493	-6.63868	-5.20196	-4.25412	-4.53308	-3.82289	-6.82749	-6.60711	#NAME?	0.326456		0.804568	#NAME?	#NAME?		#NAME?	#NAME?
P61225	Ras-related protein Rap-2b	RAP2B	0.781625	0.839546	1.15831	0.581715	0.890068	0.989868	0.921591	0.767068	1.24116	1.26543	1.65947	1.99052	#NAME?	0.0856488		0.434016	#NAME?	#NAME?		#NAME?	#NAME?
Q9Y261	Hepatocyte nuclear factor 3-beta	FOXA2	-6.17611	-2.30306	-1.62588	-2.11053	-6.58749	-2.0698	-2.76401	-6.14322	-2.51081	-1.82851	-1.33586	-1.5	#NAME?	0.616076		0.798409	#NAME?	#NAME?		#NAME?	#NAME?
Q8TAD8	Smad nuclear-interacting protein 1	SNIP1	-0.563665	-0.830548	-1.10011	-1.03198	-1.19093	-1.21539	0.0548091	-0.493338	-0.658184	-0.451763	-0.975338	-0.932258	#NAME?	0.385651		0.412759	#NAME?	#NAME?		#NAME?	#NAME?
P07947	Tyrosine-protein kinase Yes	YES1	2.20062	2.07664	1.83397	1.84172	1.2652	1.86129	1.95793	2.05436	2.34741	2.27983	2.20894	2.44151	#NAME?	0.235856		0.368427	#NAME?	#NAME?		#NAME?	#NAME?
Q12802	A-kinase anchor protein 13	AKAP13	-3.98424	-6.19739	-6.32627	-6.29243	-6.53365	-6.41155	-2.77329	-2.99158	-6.36461	-2.59214	-6.81197	-6.65091	#NAME?	0.116184		1.26017	#NAME?	#NAME?		#NAME?	#NAME?
P17568	NADH dehydrogenase [ubiquinone] 1 beta subcomplex subunit 7	NDUFB7	-0.414405	0.0444226	0.028169	-0.835407	-0.995991	0.338122	-0.113017	-0.641149	0.617463	0.146266	0.613275	0.89392	#NAME?	0.887952		0.558641	#NAME?	#NAME?		#NAME?	#NAME?
Q9BU23	Lipase maturation factor 2	LMF2	-0.464594	-0.353531	-0.317271	-0.385607	-0.296755	-0.330344	0.205625	-0.129873	0.00935562	0.0202277	-0.333732	-0.210024	#NAME?	0.0245108		0.284947	#NAME?	#NAME?		#NAME?	#NAME?
Q8N6L1	Keratinocyte-associated protein 2	KRTCAP2	0.392875	1.20788	1.12625	1.03919	0.927038	0.433083	1.41434	0.948175	1.43233	1.51295	0.949667	1.28007	#NAME?	0.458921		0.40187	#NAME?	#NAME?		#NAME?	#NAME?
H3BR10	Small leucine-rich protein 1	SMLR1	-2.69324	-2.72907	-6.52299	-6.28516	-6.46521	-6.51829	-3.18742	-3.09269	-3.3555	-3.41199	-4.0354	-6.60947	#NAME?	0.445419		1.25358	#NAME?	#NAME?		#NAME?	#NAME?
Q15262	Receptor-type tyrosine-protein phosphatase kappa	PTPRK	-1.24929	-3.33404	-1.58209	-2.75744	-1.2456	-4.13342	-2.2499	-1.45321	-1.77496	-1.4956	-1.78437	-1.00318	#NAME?	0.0355243		0.756777	#NAME?	#NAME?		#NAME?	#NAME?
Q9ULG1	Chromatin-remodeling ATPase INO80	INO80	-6.08059	-6.39872	-0.864783	-6.36273	-6.5036	-6.60228	-1.83187	-5.98105	-0.811156	-6.28369	-6.78991	-6.36301	#NAME?	0.748072		0.792005	#NAME?	#NAME?		#NAME?	#NAME?
Q14247	Src substrate cortactin	CTTN	4.64309	4.10743	4.04599	4.16194	4.22467	3.7575	4.93214	4.52858	4.67091	4.56548	4.54447	4.03316	#NAME?	0.97358		0.389021	#NAME?	#NAME?		#NAME?	#NAME?
Q9H0E2	Toll-interacting protein	TOLLIP	-0.395616	-0.762197	-0.716992	-0.768395	0.127322	-0.716875	1.30686	-0.494338	0.311461	0.201712	0.611013	-1.35698	#NAME?	0.0563849		0.635414	#NAME?	#NAME?		#NAME?	#NAME?
Q9P0L0	Vesicle-associated membrane protein-associated protein A	VAPA	1.87752	1.96206	2.16566	1.75847	2.3097	1.56378	1.90312	3.09435	1.97513	3.30774	2.76369	1.78028	#NAME?	0.0700071		0.531187	#NAME?	#NAME?		#NAME?	#NAME?
Q9NVP1	ATP-dependent RNA helicase DDX18	DDX18	1.91695	2.15428	1.65604	2.37665	3.96411	2.26534	3.16448	2.15785	2.82603	2.70582	3.69115	3.62917	#NAME?	0.490048		0.640189	#NAME?	#NAME?		#NAME?	#NAME?
O94776	Metastasis-associated protein MTA2	MTA2	1.26587	0.620039	-0.0071729	0.263735	0.771822	0.0526883	3.11982	1.10467	0.375887	0.15488	3.06145	0.0801345	#NAME?	0.0346861		0.821643	#NAME?	#NAME?		#NAME?	#NAME?
Q9H7B4	Histone-lysine N-methyltransferase SMYD3	SMYD3	-6.12157	-6.25407	-1.85792	-1.14468	-3.57646	-6.42172	4.40587	-5.97317	-6.44312	-6.41572	2.97969	-6.52489	#NAME?	0.109043		1.23418	#NAME?	#NAME?		#NAME?	#NAME?
P08069	Insulin-like growth factor 1 receptor	IGF1R	-3.29628	-3.8342	-4.75094	-6.34866	-2.25803	-4.41482	-4.74177	-3.31818	-5.04207	-2.58887	-2.57814	-0.857603	#NAME?	0.816732		0.962714	#NAME?	#NAME?		#NAME?	#NAME?
Q8TEU7	Rap guanine nucleotide exchange factor 6	RAPGEF6	-2.32557	-2.21294	-2.17942	-2.59522	-5.45614	-3.55312	-3.71807	-2.06765	-2.19403	-2.09983	-2.98457	-2.10036	#NAME?	0.189987		0.526313	#NAME?	#NAME?		#NAME?	#NAME?
Q92506	Estradiol 17-beta-dehydrogenase 8	HSD17B8	0.579809	0.840958	0.568314	0.94879	-0.226978	0.412847	0.784929	0.922055	1.00115	1.0834	1.23355	0.604262	#NAME?	0.19702		0.417599	#NAME?	#NAME?		#NAME?	#NAME?
O94953	Lysine-specific demethylase 4B	KDM4B	-4.7105	-4.49675	-2.62189	-4.36307	-2.57003	-3.2647	-3.44633	-4.06181	-2.82913	-2.94302	-2.12208	-2.38526	#NAME?	0.502494		0.706552	#NAME?	#NAME?		#NAME?	#NAME?
P52735	Guanine nucleotide exchange factor VAV2	VAV2	1.29076	0.0548922	-0.434462	-0.138379	-0.175979	-0.0917974	1.82498	0.420999	-0.631882	0.132184	2.80011	0.54757	#NAME?	0.145652		0.76482	#NAME?	#NAME?		#NAME?	#NAME?
P11234	Ras-related protein Ral-B	RALB	-0.326242	-0.276436	-0.167475	-0.334445	0.615063	-0.0823662	0.496144	-0.0888313	0.0933599	0.26727	0.516622	0.581292	#NAME?	0.526561		0.406293	#NAME?	#NAME?		#NAME?	#NAME?
Q9UPN3	Microtubule-actin cross-linking factor 1, isoforms 1/2/3/5	MACF1	-2.41669	-2.40803	-2.62059	-2.59144	-1.99041	2.23167	1.51834	-1.34078	-1.5775	-1.40635	1.98201	-2.40163	#NAME?	0.919812		1.09493	#NAME?	#NAME?		#NAME?	#NAME?
Q13277	Syntaxin-3	STX3	-3.59815	-6.30135	-6.29221	-3.00873	-6.46374	-4.69728	-0.742101	-4.41942	-6.41843	-6.31972	-0.0438218	-5.13429	#NAME?	0.20813		1.21395	#NAME?	#NAME?		#NAME?	#NAME?
P49755	Transmembrane emp24 domain-containing protein 10	TMED10	4.5263	4.55161	4.16613	3.78803	4.3113	5.10765	4.47443	4.54196	4.7572	4.80097	5.59793	4.7647	#NAME?	0.841791		0.41436	#NAME?	#NAME?		#NAME?	#NAME?
Q9Y5X1	Sorting nexin-9	SNX9	-0.511401	-0.566554	-0.237336	-0.825047	-0.514924	-0.530998	0.189695	0.0599825	-0.0906749	-0.185112	-0.121466	-1.03122	#NAME?	0.0904888		0.334578	#NAME?	#NAME?		#NAME?	#NAME?
P17096	High mobility group protein HMG-I/HMG-Y	HMGA1	3.71654	3.63792	3.0861	3.51937	3.59413	3.2395	3.48203	3.6025	4.15073	3.81638	3.97415	3.87492	#NAME?	0.97312		0.351192	#NAME?	#NAME?		#NAME?	#NAME?
Q14165	Malectin	MLEC	2.12008	2.41263	1.8635	1.92076	1.75009	2.1293	3.44055	2.0698	1.75661	2.48521	3.90309	2.20213	#NAME?	0.0146927		0.61017	#NAME?	#NAME?		#NAME?	#NAME?
P20073	Annexin A7	ANXA7	2.94266	2.56267	2.57923	2.55839	1.74776	2.42374	3.31415	3.23243	1.69365	2.88909	4.34566	3.00274	#NAME?	0.114693		0.610545	#NAME?	#NAME?		#NAME?	#NAME?
Q96FV2	Secernin-2	SCRN2	-1.30702	-3.6812	-1.62043	-5.08209	-3.37704	-2.01459	-1.24611	-2.16074	-2.3354	-2.48875	-1.51874	-2.38981	#NAME?	0.0400263		0.823804	#NAME?	#NAME?		#NAME?	#NAME?
P02753	Retinol-binding protein 4	RBP4	1.54009	0.978547	1.36404	1.63752	0.618713	2.09459	1.39879	1.23938	2.30676	1.89325	2.01455	2.54053	#NAME?	0.956811		0.526626	#NAME?	#NAME?		#NAME?	#NAME?
Q9BV38	WD repeat-containing protein 18	WDR18	0.506926	1.30953	0.525161	0.823557	0.5328	-0.199242	0.669092	0.612773	1.04342	0.609787	2.0806	0.930972	#NAME?	0.773492		0.407984	#NAME?	#NAME?		#NAME?	#NAME?
Q99424	Peroxisomal acyl-coenzyme A oxidase 2	ACOX2	-0.163511	-2.3332	-2.37758	-1.934	-1.69674	-2.6954	-0.194531	-1.23584	-0.611274	-0.517176	-4.64069	-0.516902	#NAME?	0.201719		0.58067	#NAME?	#NAME?		#NAME?	#NAME?
Q9UBB6	Neurochondrin	NCDN	-1.92597	-6.17754	-0.762249	-6.22421	-6.47266	-6.48311	-2.51344	-3.26906	-2.36285	-2.37892	-3.79439	-6.56392	#NAME?	0.316318		1.19386	#NAME?	#NAME?		#NAME?	#NAME?
O95999	B-cell lymphoma/leukemia 10	BCL10	-3.78907	-1.68037	-1.5487	-1.96483	-2.98258	-2.13063	-3.70196	-2.5633	-2.81351	-2.2492	6.56703	-0.87016	#NAME?	0.00566902		1.41085	#NAME?	#NAME?		#NAME?	#NAME?
O14791	Apolipoprotein L1	APOL1	-1.78589	-2.59984	-3.17168	-3.68384	-2.23534	-2.96853	-1.39708	-3.1218	-2.45224	-2.16384	-0.766819	-2.58123	#NAME?	0.624517		0.660355	#NAME?	#NAME?		#NAME?	#NAME?
P98194	Calcium-transporting ATPase type 2C member 1	ATP2C1	-2.19878	-1.63364	-3.61358	-2.38039	-3.86571	-2.31767	-3.16046	-0.50381	-1.98929	-1.49155	-2.50909	-2.07365	#NAME?	0.941733		0.713654	#NAME?	#NAME?		#NAME?	#NAME?
Q9NZ32	Actin-related protein 10	ACTR10	0.434801	-1.49969	-1.19186	-1.54239	-2.52936	-1.93916	-0.42206	0.579309	0.665434	0.578868	-2.58183	-1.9521	#NAME?	0.457131		0.85588	#NAME?	#NAME?		#NAME?	#NAME?
Q9BUL8	Programmed cell death protein 10	PDCD10	-0.0470932	-1.07055	-0.174171	-1.16997	-0.220101	-1.11605	1.77419	-0.105077	0.667009	-1.17149	0.864913	-1.39334	#NAME?	0.0915721		0.739022	#NAME?	#NAME?		#NAME?	#NAME?
Q96T37	RNA-binding protein 15	RBM15	-0.196243	-0.494098	-0.926658	-0.456782	-0.476541	-0.446999	0.13611	-0.0822766	-0.900301	-0.097451	-0.13324	-0.178178	#NAME?	0.391411		0.290331	#NAME?	#NAME?		#NAME?	#NAME?
Q9UL12	Sarcosine dehydrogenase, mitochondrial	SARDH	2.88665	0.514655	1.01964	0.714195	3.1094	0.829733	0.288617	2.57655	3.08861	3.31112	1.36308	3.53765	#NAME?	0.844552		0.848557	#NAME?	#NAME?		#NAME?	#NAME?
P78540	Arginase-2, mitochondrial	ARG2	-0.0176149	-1.68106	-0.0641491	-0.0292416	0.355012	-0.23555	1.51544	-0.0501399	1.01696	-0.225514	1.17085	-0.958129	#NAME?	0.523732		0.690344	#NAME?	#NAME?		#NAME?	#NAME?
P27797	Calreticulin	CALR	6.13801	6.30804	6.57211	6.48661	6.46991	6.59219	6.9067	6.33938	6.77351	6.43473	7.58486	7.00299	#NAME?	0.058166		0.412548	#NAME?	#NAME?		#NAME?	#NAME?
O75683	Surfeit locus protein 6	SURF6	-5.2897	-2.87825	-3.87115	-2.47729	-2.8302	-2.97088	-0.379912	-1.79604	-3.26994	-3.96756	-3.99878	-1.74009	#NAME?	0.482454		0.860858	#NAME?	#NAME?		#NAME?	#NAME?
Q969G6	Riboflavin kinase	RFK	1.38422	1.50444	-4.82231	-2.00895	1.51449	-1.58033	0.118359	1.44958	1.38972	1.02787	-1.39058	0.0390733	#NAME?	0.0787382		1.10708	#NAME?	#NAME?		#NAME?	#NAME?
Q2PZI1	Probable C-mannosyltransferase DPY19L1	DPY19L1	-3.59165	-3.41192	-3.34257	-5.61743	-3.03766	-5.76626	-3.36027	-6.00029	-2.7115	-2.4105	-3.2176	-1.69154	#NAME?	0.685495		0.895965	#NAME?	#NAME?		#NAME?	#NAME?
Q15397	Pumilio homolog 3	PUM3	-1.02296	0.244254	-0.16227	0.344208	0.613254	-0.0614072	1.10852	-1.59599	1.03132	1.04783	2.05268	0.719429	#NAME?	0.119546		0.734783	#NAME?	#NAME?		#NAME?	#NAME?
P17050	Alpha-N-acetylgalactosaminidase	NAGA	-1.9102	-3.08517	-1.39834	-0.628961	-6.41702	-1.03303	-1.13547	-2.00473	-1.47631	-2.70208	-1.36494	0.215948	#NAME?	0.10964		1.00086	#NAME?	#NAME?		#NAME?	#NAME?
Q969R2	Oxysterol-binding protein 2	OSBP2	-0.86604	-1.21383	-6.51853	-6.44065	-6.40983	-6.52516	-6.59484	-1.34469	-1.39627	-2.50725	-6.80588	-1.1255	#NAME?	0.92162		1.3666	#NAME?	#NAME?		#NAME?	#NAME?
O75607	Nucleoplasmin-3	NPM3	1.92518	1.87857	1.68142	1.68551	1.38707	1.11964	3.75756	1.40814	1.75776	1.66115	4.64099	1.19111	#NAME?	0.00420103		0.789885	#NAME?	#NAME?		#NAME?	#NAME?
Q96QC0	Serine/threonine-protein phosphatase 1 regulatory subunit 10	PPP1R10	-0.0225331	-1.63831	-1.00736	-1.43914	-0.052854	-0.922639	-1.5189	-0.0117618	0.585883	0.391333	-0.950842	0.298443	#NAME?	0.650647		0.646165	#NAME?	#NAME?		#NAME?	#NAME?
Q8TD19	Serine/threonine-protein kinase Nek9	NEK9	-2.6646	-1.45937	-1.35451	-2.12769	-2.00184	-1.48063	-2.16402	-1.08732	-0.97693	-1.05517	-2.03402	-0.399242	#NAME?	0.543951		0.561989	#NAME?	#NAME?		#NAME?	#NAME?
Q86TG7	Retrotransposon-derived protein PEG10	PEG10	1.89766	1.95081	1.91439	1.83735	1.74855	2.0689	3.09149	2.58633	1.67806	2.06458	2.19751	2.42858	#NAME?	0.00505442		0.438148	#NAME?	#NAME?		#NAME?	#NAME?
Q9Y320	Thioredoxin-related transmembrane protein 2	TMX2	0.582098	0.378641	0.413984	-0.460034	-1.032	0.375159	0.587633	0.330166	0.396453	0.689521	0.90777	0.418217	#NAME?	0.0334337		0.511985	#NAME?	#NAME?		#NAME?	#NAME?
Q9P0I2	ER membrane protein complex subunit 3	EMC3	-0.128964	-0.840872	-0.174975	-0.890988	-1.18227	-0.857776	-0.0526693	-0.50192	-0.392167	-0.252482	-0.0317565	-0.427122	#NAME?	0.118251		0.402954	#NAME?	#NAME?		#NAME?	#NAME?
Q6WKZ4	Rab11 family-interacting protein 1	RAB11FIP1	-3.64443	-4.07433	-5.58375	-6.28517	-3.99818	-6.55969	-6.33583	-3.34301	-3.26632	-2.83241	-5.09882	-4.06934	#NAME?	0.926769		0.866637	#NAME?	#NAME?		#NAME?	#NAME?
Q8IWR0	Zinc finger CCCH domain-containing protein 7A	ZC3H7A	1.56418	-1.43266	-2.14813	-1.95095	-2.21201	-2.69943	-4.88191	1.7466	1.50074	1.67144	-5.46529	1.52925	#NAME?	0.0962835		0.829973	#NAME?	#NAME?		#NAME?	#NAME?
Q96RU8	Tribbles homolog 1	TRIB1	-1.93127	-4.61263	-6.31175	-6.39325	-0.771544	-1.60978	-6.54335	-1.71115	-0.245391	-6.35953	-0.605215	-1.19106	#NAME?	0.749079		0.829089	#NAME?	#NAME?		#NAME?	#NAME?
Q9UBX3	Mitochondrial dicarboxylate carrier	SLC25A10	2.94204	2.73891	2.85865	2.57965	2.54402	2.4634	2.82935	2.91376	2.8987	2.76765	3.73683	3.21992	#NAME?	0.174194		0.373258	#NAME?	#NAME?		#NAME?	#NAME?
Q86WR7	Proline and serine-rich protein 2	PROSER2	-2.55999	-6.16275	-3.71675	-3.87699	-2.23803	-3.48454	-2.85677	-6.14033	-2.41976	-2.28881	-3.20253	-1.86172	#NAME?	0.813033		0.544857	#NAME?	#NAME?		#NAME?	#NAME?
P0DMV9	Heat shock 70 kDa protein 1B	HSPA1B	5.6438	5.64134	5.83827	5.45246	6.05001	5.48266	6.83338	6.14555	5.36186	5.83096	6.95156	5.966	#NAME?	0.048039		0.496795	#NAME?	#NAME?		#NAME?	#NAME?
P55884	Eukaryotic translation initiation factor 3 subunit B	EIF3B	3.5697	2.73422	2.87032	2.7934	2.66631	2.7454	2.95927	3.28741	3.11983	3.25436	3.83966	3.26243	#NAME?	0.79262		0.390603	#NAME?	#NAME?		#NAME?	#NAME?
Q2PPJ7	Ral GTPase-activating protein subunit alpha-2	RALGAPA2	-3.95814	-2.54396	-1.5809	-1.46383	-2.54117	-6.41117	-0.803331	-4.34591	-2.14379	-2.84294	0.734665	-2.85731	#NAME?	0.926582		1.04009	#NAME?	#NAME?		#NAME?	#NAME?
P56945	Breast cancer anti-estrogen resistance protein 1	BCAR1	2.41763	2.11051	-3.65791	2.64316	3.09695	2.67514	2.65942	2.4843	2.85506	2.43394	3.04763	2.22498	#NAME?	0.00022251		1.06998	#NAME?	#NAME?		#NAME?	#NAME?
P16662	UDP-glucuronosyltransferase 2B7	UGT2B7	2.64081	2.34452	1.11871	1.23329	2.70667	1.91796	2.15305	2.76322	2.74178	2.70735	2.24398	2.45657	#NAME?	0.0569757		0.51733	#NAME?	#NAME?		#NAME?	#NAME?
A8MXU0	Putative beta-defensin 108A	DEFB108A	-6.07827	-4.86059	-6.29124	-4.6029	-6.50789	-6.65122	-2.81336	-5.93857	-6.31126	-6.2009	-2.203	-6.60875	#NAME?	0.102294		0.819381	#NAME?	#NAME?		#NAME?	#NAME?
Q8N5T2	TBC1 domain family member 19	TBC1D19	-2.88492	-3.81342	-3.4861	-4.02751	-6.57792	-4.03847	-2.14129	-6.04822	-0.648844	0.101342	-2.63434	-6.61827	#NAME?	0.112169		1.13979	#NAME?	#NAME?		#NAME?	#NAME?
O43823	A-kinase anchor protein 8	AKAP8	-1.02457	-0.649238	-1.02341	-1.61631	-0.592509	-0.757518	0.393842	-0.762268	-1.11443	-0.73767	1.63487	-1.02913	#NAME?	0.0375318		0.674796	#NAME?	#NAME?		#NAME?	#NAME?
P56134	ATP synthase subunit f, mitochondrial	ATP5MF	3.27978	3.33222	3.4328	3.34328	3.66565	3.72232	4.1325	3.39175	3.86182	3.65603	4.4671	3.5704	#NAME?	0.123681		0.383926	#NAME?	#NAME?		#NAME?	#NAME?
Q9GZM7	Tubulointerstitial nephritis antigen-like	TINAGL1	-1.41576	-3.1627	-1.8103	-2.88123	-1.47806	-2.09302	-2.82178	-1.2303	-1.55274	-0.961454	-0.930287	-1.66082	#NAME?	0.930538		0.613951	#NAME?	#NAME?		#NAME?	#NAME?
P42166	Lamina-associated polypeptide 2, isoform alpha	TMPO	1.79403	2.15339	1.19715	1.3992	1.8713	1.83023	5.66089	1.68143	1.48766	1.42248	6.63926	1.26047	#NAME?	0.00058792		1.31782	#NAME?	#NAME?		#NAME?	#NAME?
Q9Y2D2	UDP-N-acetylglucosamine transporter	SLC35A3	1.50826	0.805245	1.32729	0.0453023	1.56529	1.00348	0.750909	1.63517	1.66272	1.72351	1.07275	1.66427	#NAME?	0.475495		0.375743	#NAME?	#NAME?		#NAME?	#NAME?
O95363	Phenylalanine--tRNA ligase, mitochondrial	FARS2	-1.92136	-1.71247	-1.58815	-1.38527	-1.94244	-1.79779	-1.46295	-1.15654	-0.681396	-1.37332	-1.36721	-1.9387	#NAME?	0.17436		0.394558	#NAME?	#NAME?		#NAME?	#NAME?
P36405	ADP-ribosylation factor-like protein 3	ARL3	1.78746	0.545569	0.277559	0.268089	0.564735	0.416992	1.08792	1.55301	1.39316	1.58831	0.278175	1.0653	#NAME?	0.724355		0.517577	#NAME?	#NAME?		#NAME?	#NAME?
Q13445	Transmembrane emp24 domain-containing protein 1	TMED1	-0.183802	-0.287522	-0.157562	-0.60634	-0.0345134	-0.820838	1.66446	-0.463453	-0.343223	0.0205875	1.93641	-0.75938	#NAME?	0.0102691		0.690995	#NAME?	#NAME?		#NAME?	#NAME?
Q16513	Serine/threonine-protein kinase N2	PKN2	-0.596534	-0.452632	-0.870659	-0.371325	0.112215	-3.41236	1.7838	-0.733292	-1.82552	-0.605133	2.87766	-1.3615	#NAME?	0.401774		0.954552	#NAME?	#NAME?		#NAME?	#NAME?
P20042	Eukaryotic translation initiation factor 2 subunit 2	EIF2S2	2.82418	2.89947	2.04393	2.64604	2.13773	2.53925	2.31732	2.59957	2.80191	3.25765	3.24203	3.55573	#NAME?	0.556297		0.447269	#NAME?	#NAME?		#NAME?	#NAME?
Q9NQS7	Inner centromere protein	INCENP	-6.04496	-3.35586	-6.30418	-6.49685	-3.9472	-6.48119	-6.42223	-5.88674	1.30442	-6.37933	-6.8756	-1.84782	#NAME?	0.0817291		1.08716	#NAME?	#NAME?		#NAME?	#NAME?
P03897	NADH-ubiquinone oxidoreductase chain 3	MT-ND3	-1.46841	-0.0572737	-0.212463	-0.328713	-6.33386	0.259955	0.663233	-1.14438	-0.241889	-0.759033	-0.419475	0.0534745	#NAME?	0.00883066		1.04878	#NAME?	#NAME?		#NAME?	#NAME?
Q9P2C4	Transmembrane protein 181	TMEM181	-0.311748	-1.71107	-0.357488	-0.000509595	-0.844745	-0.967868	-0.318083	-0.174151	-0.53554	-0.117332	-0.452427	0.330585	#NAME?	0.160622		0.487746	#NAME?	#NAME?		#NAME?	#NAME?
Q9NY12	H/ACA ribonucleoprotein complex subunit 1	GAR1	0.925945	0.441839	0.609165	0.887442	-0.951207	1.40853	1.39797	0.369044	0.911242	1.22144	1.27383	1.59288	#NAME?	0.199122		0.574115	#NAME?	#NAME?		#NAME?	#NAME?
Q96MU7	YTH domain-containing protein 1	YTHDC1	0.470348	-0.207339	-0.217752	0.0124045	-1.26525	-0.381656	1.09048	0.252091	-0.142815	-0.132127	1.17437	-0.447201	#NAME?	0.707166		0.564007	#NAME?	#NAME?		#NAME?	#NAME?
Q9NR19	Acetyl-coenzyme A synthetase, cytoplasmic	ACSS2	0.432413	0.516944	0.726442	0.250982	-0.734245	0.488119	0.958752	0.926045	0.711239	0.714091	0.346794	0.639842	#NAME?	0.0843792		0.436018	#NAME?	#NAME?		#NAME?	#NAME?
Q16629	Serine/arginine-rich splicing factor 7	SRSF7	3.90531	3.68061	3.58987	3.95777	4.29518	3.90495	4.20362	3.57963	4.40365	4.25122	5.19428	4.31895	#NAME?	0.129017		0.436276	#NAME?	#NAME?		#NAME?	#NAME?
Q14739	Delta(14)-sterol reductase LBR	LBR	4.23867	3.09104	2.54915	3.10135	2.68644	2.60763	1.86929	4.063	4.09761	4.12158	3.18909	4.0086	#NAME?	0.455188		0.512482	#NAME?	#NAME?		#NAME?	#NAME?
Q9Y2R5	28S ribosomal protein S17, mitochondrial	MRPS17	1.49147	1.41422	1.44197	1.1883	0.419277	0.640537	1.64316	1.08449	1.64985	1.71846	1.61883	1.02505	#NAME?	0.424081		0.357345	#NAME?	#NAME?		#NAME?	#NAME?
Q9NXF1	Testis-expressed protein 10	TEX10	1.28339	1.25383	-0.0577669	-1.18308	-0.192536	-1.45216	-0.780558	1.33933	0.855171	1.49221	-0.173791	1.41221	#NAME?	0.671332		0.748818	#NAME?	#NAME?		#NAME?	#NAME?
O75907	Diacylglycerol O-acyltransferase 1	DGAT1	-1.16912	-1.22449	-1.35909	-0.726727	-1.39543	-0.959608	-1.21673	-1.06895	-0.277715	-0.524132	-0.985903	-0.452125	#NAME?	0.388371		0.384819	#NAME?	#NAME?		#NAME?	#NAME?
P06748	Nucleophosmin	NPM1	6.28528	6.43124	6.2692	6.7504	6.81263	6.96161	7.16381	6.42768	7.29479	6.87209	7.15156	6.82403	#NAME?	0.881088		0.370602	#NAME?	#NAME?		#NAME?	#NAME?
Q7Z6Z7	E3 ubiquitin-protein ligase HUWE1	HUWE1	0.789284	1.03601	0.444012	0.500488	1.22299	1.53694	3.21617	0.804228	0.197979	2.22095	3.81894	0.103926	#NAME?	0.0116211		0.805412	#NAME?	#NAME?		#NAME?	#NAME?
Q9H8M1	Coenzyme Q-binding protein COQ10 homolog B, mitochondrial	COQ10B	0.468571	0.334471	-1.67809	-3.00444	0.804162	-0.188083	-1.78913	0.543892	0.458505	1.2593	0.244117	1.042	#NAME?	0.508356		0.837016	#NAME?	#NAME?		#NAME?	#NAME?
P37059	Estradiol 17-beta-dehydrogenase 2	HSD17B2	0.31012	0.52489	0.0373069	0.359269	2.0782	0.763616	2.47033	0.268237	0.96893	0.822077	2.8915	0.744756	#NAME?	0.429405		0.682072	#NAME?	#NAME?		#NAME?	#NAME?
Q9UIC8	Leucine carboxyl methyltransferase 1	LCMT1	-1.8595	-2.31686	-1.1644	-1.09893	-4.9031	-1.10001	-1.59451	-1.56707	-0.554973	-2.88346	-0.567199	-0.399667	#NAME?	0.363907		0.812655	#NAME?	#NAME?		#NAME?	#NAME?
Q5H9R7	Serine/threonine-protein phosphatase 6 regulatory subunit 3	PPP6R3	-0.853867	-1.0663	-1.97555	-2.57404	-2.25693	-2.14218	-1.28817	-0.970156	-1.3315	-1.2191	-1.8464	-1.18889	#NAME?	0.0820018		0.504104	#NAME?	#NAME?		#NAME?	#NAME?
O75352	Mannose-P-dolichol utilization defect 1 protein	MPDU1	0.832743	0.670297	0.4686	0.429725	0.223139	0.547997	0.827439	0.446626	0.954539	1.06253	1.36196	0.609056	#NAME?	0.350756		0.348275	#NAME?	#NAME?		#NAME?	#NAME?
O75694	Nuclear pore complex protein Nup155	NUP155	1.70145	0.541597	1.05678	0.691091	1.53776	0.701421	0.0429749	1.50715	2.71771	2.6132	0.802648	2.48417	#NAME?	0.0949215		0.656291	#NAME?	#NAME?		#NAME?	#NAME?
Q08211	ATP-dependent RNA helicase A	DHX9	4.32234	4.12157	4.36982	4.58834	3.57702	4.50999	4.48069	4.36198	4.62473	4.68014	4.82027	4.63401	#NAME?	0.0924825		0.352126	#NAME?	#NAME?		#NAME?	#NAME?
Q6L8Q7	2',5'-phosphodiesterase 12	PDE12	1.28642	0.744253	0.625677	0.4321	1.058	0.749187	1.44759	1.27735	1.26837	1.2353	1.0288	0.738005	#NAME?	0.651577		0.349963	#NAME?	#NAME?		#NAME?	#NAME?
O14727	Apoptotic protease-activating factor 1	APAF1	-2.43127	-2.69445	-6.50427	-4.14782	-2.90819	-6.45829	-3.6075	-2.27469	-2.62092	-2.75026	-4.90628	-3.62776	#NAME?	0.169063		0.89281	#NAME?	#NAME?		#NAME?	#NAME?
P13804	Electron transfer flavoprotein subunit alpha, mitochondrial	ETFA	4.58317	4.95917	5.07646	4.8436	3.24913	4.85055	5.24251	4.61943	5.10716	5.11503	5.83837	4.75904	#NAME?	0.332193		0.519912	#NAME?	#NAME?		#NAME?	#NAME?
P43155	Carnitine O-acetyltransferase	CRAT	0.423727	0.705915	1.22814	0.650247	0.558726	0.688603	1.23295	0.786738	3.86554	3.21591	0.56494	-0.523818	#NAME?	0.00116116		0.814483	#NAME?	#NAME?		#NAME?	#NAME?
Q6ZT12	E3 ubiquitin-protein ligase UBR3	UBR3	-6.33927	-6.32528	-3.03056	-6.36828	-6.59174	-3.17245	-2.74933	-6.13288	-6.23945	-6.12574	-1.08603	-6.53702	#NAME?	0.526524		0.492858	#NAME?	#NAME?		#NAME?	#NAME?
Q8N5A5	Zinc finger CCCH-type with G patch domain-containing protein	ZGPAT	-0.544707	-0.260705	-0.0435447	-0.642484	-2.11052	-3.10634	-0.207896	-0.19014	-0.926408	-0.297903	-0.565902	-0.416386	#NAME?	0.0057763		0.683944	#NAME?	#NAME?		#NAME?	#NAME?
Q9NQT4	Exosome complex component RRP46	EXOSC5	-0.285105	0.192099	2.64142	-0.486601	-1.39799	-0.672665	1.22992	-0.118703	0.249957	0.93647	1.32028	0.796125	#NAME?	0.068967		0.737149	#NAME?	#NAME?		#NAME?	#NAME?
Q9P289	Serine/threonine-protein kinase 26	STK26	1.02665	0.783154	1.34145	1.35625	1.17581	1.40832	4.24495	0.769185	0.596123	0.769419	3.56631	1.00225	#NAME?	0.000707232		0.642766	#NAME?	#NAME?		#NAME?	#NAME?
P21964	Catechol O-methyltransferase	COMT	2.60158	3.16403	3.21981	3.01759	-2.6499	3.45133	3.20793	2.91702	2.85532	2.98725	3.44797	3.23078	#NAME?	8.47327e-05		0.973639	#NAME?	#NAME?		#NAME?	#NAME?
Q3V6T2	Girdin	CCDC88A	0.0472985	-1.45658	-4.56704	-1.27848	0.834588	-1.4764	-1.73782	-0.485942	-0.110782	-0.547561	0.489469	-0.34985	#NAME?	0.0628905		0.85902	#NAME?	#NAME?		#NAME?	#NAME?
P03886	NADH-ubiquinone oxidoreductase chain 1	MT-ND1	-0.190387	0.0769809	-0.221013	-0.209008	-0.0453396	-0.0820129	0.407235	-0.194788	0.107029	-0.103495	0.529465	0.768737	#NAME?	0.0222843		0.364161	#NAME?	#NAME?		#NAME?	#NAME?
Q9UNL2	Translocon-associated protein subunit gamma	SSR3	2.34894	2.54418	2.75108	2.36743	2.59438	2.60903	2.75254	2.52432	2.93905	2.71778	3.35191	2.78247	#NAME?	0.210278		0.308839	#NAME?	#NAME?		#NAME?	#NAME?
P14415	Sodium/potassium-transporting ATPase subunit beta-2	ATP1B2	-1.66035	-1.79649	-2.36947	-1.03274	-6.45209	-2.83108	-1.41278	-0.728435	-0.847933	-1.74397	-3.50333	-2.44293	#NAME?	0.203274		0.910478	#NAME?	#NAME?		#NAME?	#NAME?
O43292	Glycosylphosphatidylinositol anchor attachment 1 protein	GPAA1	-1.08417	-1.05778	-1.17252	-1.36091	-0.0756067	-0.662873	-0.607559	-0.982154	-0.173725	-0.172445	-0.1163	-0.760415	#NAME?	0.608853		0.433543	#NAME?	#NAME?		#NAME?	#NAME?
Q13530	Serine incorporator 3	SERINC3	-6.06961	-3.27745	-3.31362	-4.20524	-5.18272	-4.38233	-1.83266	-3.82442	-3.3627	-6.30296	-2.51588	-3.63251	#NAME?	0.46759		0.826642	#NAME?	#NAME?		#NAME?	#NAME?
P41252	Isoleucine--tRNA ligase, cytoplasmic	IARS	2.34923	2.43997	2.57251	2.50889	2.51666	2.62372	2.81227	2.46783	2.69775	2.86774	3.38656	2.72383	#NAME?	0.0246005		0.324165	#NAME?	#NAME?		#NAME?	#NAME?
Q7Z2E3	Aprataxin	APTX	-1.46461	-2.0168	-0.648257	-1.62721	-1.53355	-2.14077	-0.145848	-1.106	-1.00176	-1.03188	-0.384741	-2.39067	#NAME?	0.408291		0.561716	#NAME?	#NAME?		#NAME?	#NAME?
Q9Y6D6	Brefeldin A-inhibited guanine nucleotide-exchange protein 1	ARFGEF1	-4.5769	-4.0794	-6.43947	-4.58741	-6.48268	-6.51099	-6.40613	-3.90311	-1.91853	-1.91941	-6.99276	-5.70597	#NAME?	0.168429		0.971823	#NAME?	#NAME?		#NAME?	#NAME?
Q14CS0	UBX domain-containing protein 2B	UBXN2B	-2.15646	-6.3852	-6.49906	-6.42456	-6.33526	-6.59082	-6.53682	-2.09134	-3.30353	-3.12136	-6.87615	-6.35789	#NAME?	0.700375		1.01738	#NAME?	#NAME?		#NAME?	#NAME?
O15371	Eukaryotic translation initiation factor 3 subunit D	EIF3D	3.32872	2.33049	2.51586	2.61826	3.66755	2.42911	2.63439	2.9466	4.18766	3.54007	2.75523	4.02483	#NAME?	0.678277		0.533129	#NAME?	#NAME?		#NAME?	#NAME?
P39656	Dolichyl-diphosphooligosaccharide--protein glycosyltransferase 48 kDa subunit	DDOST	4.05278	3.90408	3.88166	3.87657	4.28685	3.93218	4.32936	3.89027	4.27955	4.38684	5.23653	4.19549	#NAME?	0.0394318		0.397321	#NAME?	#NAME?		#NAME?	#NAME?
P07919	Cytochrome b-c1 complex subunit 6, mitochondrial	UQCRH	2.25977	1.89604	1.08448	1.82986	-1.98529	1.53738	2.3637	1.43189	2.03072	1.43043	2.42303	1.61202	#NAME?	0.0166634		0.778255	#NAME?	#NAME?		#NAME?	#NAME?
Q9NXV6	CDKN2A-interacting protein	CDKN2AIP	0.287166	0.325018	-0.836308	0.361989	-0.480969	0.185463	0.688309	0.0509811	0.51656	0.364666	0.618172	0.129028	#NAME?	0.172546		0.420893	#NAME?	#NAME?		#NAME?	#NAME?
Q9P0S3	ORM1-like protein 1	ORMDL1	-0.417865	0.2404	-0.156262	-0.369204	0.106835	0.917319	0.804195	0.428912	0.393702	-0.0554476	1.03947	0.370638	#NAME?	0.576758		0.443375	#NAME?	#NAME?		#NAME?	#NAME?
Q14152	Eukaryotic translation initiation factor 3 subunit A	EIF3A	3.64526	2.96592	2.80418	3.09952	3.13393	2.55445	2.85903	3.41076	3.99274	3.91251	2.89816	3.78611	#NAME?	0.503635		0.442676	#NAME?	#NAME?		#NAME?	#NAME?
Q9NRL3	Striatin-4	STRN4	-2.84843	-1.34024	-3.56126	-3.22214	-3.96434	-2.7094	-2.85304	-2.39796	-2.38379	-2.41448	-1.47901	-2.61472	#NAME?	0.1694		0.583802	#NAME?	#NAME?		#NAME?	#NAME?
Q3ZLR7	Transcription factor SPT20 homolog-like 1	SUPT20HL1	1.77247	1.58007	1.76373	2.82123	1.48894	0.646457	6.45062	1.828	2.12947	1.43559	5.2641	-0.814767	#NAME?	0.0104288		1.03669	#NAME?	#NAME?		#NAME?	#NAME?
Q13158	FAS-associated death domain protein	FADD	-4.12898	-1.81506	-0.968179	-2.02749	-6.43835	-1.83305	-0.936984	-0.824202	-3.44219	-2.87353	-0.601011	-2.88285	#NAME?	0.320628		0.941727	#NAME?	#NAME?		#NAME?	#NAME?
Q96PK6	RNA-binding protein 14	RBM14	2.45262	1.81193	1.28357	1.82758	2.86505	1.70867	2.14808	2.26049	2.56204	2.48664	2.44332	2.73897	#NAME?	0.0489879		0.448355	#NAME?	#NAME?		#NAME?	#NAME?
Q7Z7H8	39S ribosomal protein L10, mitochondrial	MRPL10	-1.42443	-2.00561	-1.53758	-2.38511	-1.63446	-2.61034	-1.87629	-1.11803	-1.87221	-1.59626	-1.4168	-1.15558	#NAME?	0.437273		0.427061	#NAME?	#NAME?		#NAME?	#NAME?
Q12788	Transducin beta-like protein 3	TBL3	0.923007	0.615837	0.47617	0.202663	-3.11048	0.725208	-0.393152	1.16701	1.09252	1.27709	-0.258038	1.67402	#NAME?	0.236999		0.787841	#NAME?	#NAME?		#NAME?	#NAME?
P10412	Histone H1.4	HIST1H1E	2.52053	0.215217	-0.999556	3.07252	0.530968	-0.445054	1.92574	1.95026	1.39762	1.38729	2.95762	0.169957	#NAME?	0.230554		0.815642	#NAME?	#NAME?		#NAME?	#NAME?
Q9NNW7	Thioredoxin reductase 2, mitochondrial	TXNRD2	0.440685	0.376681	0.0558004	0.175352	-3.01961	-0.505484	0.99884	0.365366	-0.465758	-0.240903	1.44716	-0.213856	#NAME?	0.259322		0.727905	#NAME?	#NAME?		#NAME?	#NAME?
Q9BRJ6	Uncharacterized protein C7orf50	C7orf50	0.0699758	-3.38195	-1.26311	-2.18137	-2.25775	-2.65372	-2.53334	0.107014	-0.561031	-0.792141	-2.26384	-1.18068	#NAME?	0.723584		0.740652	#NAME?	#NAME?		#NAME?	#NAME?
Q9NY65	Tubulin alpha-8 chain	TUBA8	-6.23338	-3.28569	-3.8265	-3.51591	-6.48428	-6.40504	-1.36281	-4.33842	-6.36052	-3.6819	-1.63168	-6.38961	#NAME?	0.474491		0.997645	#NAME?	#NAME?		#NAME?	#NAME?
Q6ZRP7	Sulfhydryl oxidase 2	QSOX2	-0.229018	-0.109416	-0.24286	-0.417759	1.01669	-1.73504	1.18969	0.388811	-0.246915	-0.117713	-0.00989862	0.571565	#NAME?	0.30514		0.582158	#NAME?	#NAME?		#NAME?	#NAME?
P14859	POU domain, class 2, transcription factor 1	POU2F1	-2.42633	-1.33489	-1.23241	-2.66378	-0.669188	0.823016	-0.154016	-1.26204	-1.67162	1.55406	-1.87281	0.803356	#NAME?	0.827607		0.816752	#NAME?	#NAME?		#NAME?	#NAME?
Q9H469	F-box/LRR-repeat protein 15	FBXL15	-2.35106	-1.38374	-1.47382	-0.141108	-1.46994	-3.06619	-0.701682	-0.796767	-0.250089	-0.394428	-2.23323	-1.61606	#NAME?	0.592366		0.648933	#NAME?	#NAME?		#NAME?	#NAME?
O60343	TBC1 domain family member 4	TBC1D4	-1.72983	-1.19034	0.207195	-1.71606	-6.43561	-1.48582	-1.09947	-2.05874	-0.254054	-0.772641	-2.27262	-0.27097	#NAME?	0.0565002		0.936996	#NAME?	#NAME?		#NAME?	#NAME?
Q66PJ3	ADP-ribosylation factor-like protein 6-interacting protein 4	ARL6IP4	0.322867	-0.182589	0.199733	-0.513238	0.350655	-0.185067	-0.517119	0.627666	0.735217	1.03123	0.0147199	0.862822	#NAME?	0.264771		0.460362	#NAME?	#NAME?		#NAME?	#NAME?
P48449	Lanosterol synthase	LSS	1.98442	0.88838	1.21614	0.859225	1.80679	1.28911	1.35426	1.89667	2.02889	2.2632	0.916758	2.49287	#NAME?	0.621424		0.484766	#NAME?	#NAME?		#NAME?	#NAME?
Q14331	Protein FRG1	FRG1	-0.415679	-0.678856	-1.65832	-0.0837898	-2.08335	-1.44759	-0.50297	-0.0120904	-0.896684	-0.560805	-0.403649	-0.875071	#NAME?	0.079044		0.519386	#NAME?	#NAME?		#NAME?	#NAME?
Q12849	G-rich sequence factor 1	GRSF1	0.366167	0.123864	-0.0136176	-0.207872	-0.353653	-0.53124	0.824878	0.702873	0.162269	-0.0777523	-0.534747	1.09791	#NAME?	0.189991		0.465297	#NAME?	#NAME?		#NAME?	#NAME?
O95486	Protein transport protein Sec24A	SEC24A	0.85369	1.27849	1.14308	1.42152	1.48535	0.963342	2.41835	1.25681	2.56677	1.07091	2.37438	0.680394	#NAME?	0.0214616		0.537023	#NAME?	#NAME?		#NAME?	#NAME?
Q9UN86	Ras GTPase-activating protein-binding protein 2	G3BP2	1.28846	0.419307	0.847378	-0.111648	0.217167	0.42697	1.08655	1.4945	1.56999	2.0716	0.8251	-0.51242	#NAME?	0.214939		0.574614	#NAME?	#NAME?		#NAME?	#NAME?
Q9BQB6	Vitamin K epoxide reductase complex subunit 1	VKORC1	3.01395	2.59329	2.49622	2.18352	-2.20996	2.26293	3.39451	2.56518	2.11684	2.4053	3.02929	1.98693	#NAME?	0.0137222		0.859682	#NAME?	#NAME?		#NAME?	#NAME?
Q92522	Histone H1x	H1FX	3.30979	3.69355	3.47737	3.61374	3.83738	3.47783	3.89895	3.93577	3.93985	4.02916	3.50012	3.73269	#NAME?	0.943324		0.271145	#NAME?	#NAME?		#NAME?	#NAME?
Q9UK22	F-box only protein 2	FBXO2	3.32949	2.29196	2.39379	2.38517	1.40806	2.52888	2.89766	2.7329	2.77775	2.9147	2.89974	2.83936	#NAME?	0.000274166		0.454129	#NAME?	#NAME?		#NAME?	#NAME?
P38117	Electron transfer flavoprotein subunit beta	ETFB	4.27168	4.56253	4.70066	4.63745	5.11985	4.71394	5.22822	4.44747	5.02027	5.00833	5.53523	4.94232	#NAME?	0.572135		0.362623	#NAME?	#NAME?		#NAME?	#NAME?
P07602	Prosaposin	PSAP	0.939882	1.16947	0.684786	1.15316	-2.02305	0.378169	0.954186	1.06335	1.269	1.00779	1.08085	0.873471	#NAME?	0.000173262		0.657705	#NAME?	#NAME?		#NAME?	#NAME?
P84157	Matrix-remodeling-associated protein 7	MXRA7	-1.24973	-0.889145	-1.48278	-1.17146	-6.46222	-1.58878	-0.681518	-1.38944	-0.139107	-0.351676	-1.7959	-2.96779	#NAME?	0.151896		0.919781	#NAME?	#NAME?		#NAME?	#NAME?
P10620	Microsomal glutathione S-transferase 1	MGST1	3.68925	3.71416	3.62115	3.50376	1.88245	3.34873	4.27341	3.27931	3.67159	3.18121	4.93746	3.74322	#NAME?	0.890428		0.554446	#NAME?	#NAME?		#NAME?	#NAME?
Q9UGK3	Signal-transducing adaptor protein 2	STAP2	-0.934877	-0.949736	-1.47687	-0.874807	-0.968814	-3.68276	-0.357131	-0.882029	-0.960089	-0.714253	0.309705	-3.89366	#NAME?	0.556931		0.398401	#NAME?	#NAME?		#NAME?	#NAME?
P21796	Voltage-dependent anion-selective channel protein 1	VDAC1	6.30517	6.55768	6.49308	6.69477	6.5879	6.41075	6.8099	6.25459	6.94469	6.60356	7.8364	7.13348	#NAME?	0.00956567		0.422211	#NAME?	#NAME?		#NAME?	#NAME?
Q96EY9	Probable inactive tRNA-specific adenosine deaminase-like protein 3	ADAT3	-6.16134	-5.19035	-6.35745	-4.68528	-4.11336	-6.42719	-0.185438	-2.81554	-6.3657	-4.07529	-6.92324	-6.45651	#NAME?	0.0467195		1.01888	#NAME?	#NAME?		#NAME?	#NAME?
Q9Y2S7	Polymerase delta-interacting protein 2	POLDIP2	1.58173	1.39543	0.631232	1.32194	2.05868	1.28109	1.93489	1.63996	1.66398	1.7801	1.75607	1.83372	#NAME?	0.00650268		0.389772	#NAME?	#NAME?		#NAME?	#NAME?
P78549	Endonuclease III-like protein 1	NTHL1	-2.5239	-3.22586	-5.0951	-3.23045	-2.64539	-5.5654	-2.82699	-2.62718	-2.6198	-2.34887	-6.98958	-2.49563	#NAME?	0.481628		0.39634	#NAME?	#NAME?		#NAME?	#NAME?
Q8NEH6	Meiosis-specific nuclear structural protein 1	MNS1	-1.87097	-2.16505	-2.63091	-6.39795	-1.91816	-2.4364	-1.71732	-1.36436	-1.53629	-1.9575	-3.43098	-2.57384	#NAME?	0.102228		0.806523	#NAME?	#NAME?		#NAME?	#NAME?
Q8NDI1	EH domain-binding protein 1	EHBP1	-1.17886	-1.22695	-1.05422	-1.25807	-1.02491	-0.101152	-0.0676142	-1.41853	-0.763916	-0.496217	0.890411	-0.806912	#NAME?	0.222086		0.530228	#NAME?	#NAME?		#NAME?	#NAME?
Q9H0X4	Protein FAM234A	FAM234A	-6.19003	-3.40255	-2.75044	-6.28185	-3.91804	-6.43772	-2.44953	-2.47858	-3.82208	-4.02299	-6.90693	-3.907	#NAME?	0.965014		0.898919	#NAME?	#NAME?		#NAME?	#NAME?
Q15814	Tubulin-specific chaperone C	TBCC	-3.00579	-2.87276	-3.16145	-4.46999	-3.58026	-0.659645	0.14534	1.52885	-1.7696	-4.40204	-0.102319	-6.56966	#NAME?	0.073754		1.09674	#NAME?	#NAME?		#NAME?	#NAME?
Q96C36	Pyrroline-5-carboxylate reductase 2	PYCR2	1.2627	1.53262	1.14389	1.43493	1.45463	0.109203	1.42063	1.40502	1.42163	1.47899	1.99484	1.57385	#NAME?	0.0849058		0.392833	#NAME?	#NAME?		#NAME?	#NAME?
Q9H0U9	Testis-specific Y-encoded-like protein 1	TSPYL1	-6.19142	-2.84647	-3.63266	-2.9609	-4.43147	-4.68632	-2.8198	-4.27466	-1.72057	-2.56823	-1.41298	-6.59058	#NAME?	0.370645		0.893737	#NAME?	#NAME?		#NAME?	#NAME?
Q96I59	Probable asparagine--tRNA ligase, mitochondrial	NARS2	-0.332345	0.589566	-0.380756	-0.343445	0.260941	0.0548991	-0.570224	-0.904466	2.788	2.09042	0.0551071	0.76116	#NAME?	0.0119173		0.728524	#NAME?	#NAME?		#NAME?	#NAME?
P35606	Coatomer subunit beta'	COPB2	3.42091	2.88865	2.93157	3.21069	1.7953	3.2389	2.45206	3.05841	4.23568	3.73572	2.80531	4.61805	#NAME?	0.427294		0.56987	#NAME?	#NAME?		#NAME?	#NAME?
Q9ULA0	Aspartyl aminopeptidase	DNPEP	1.81173	2.03478	1.60918	1.17878	1.13197	1.18379	2.36679	2.11773	1.34777	1.79951	2.01362	1.64704	#NAME?	0.904838		0.390371	#NAME?	#NAME?		#NAME?	#NAME?
Q9P2R6	Arginine-glutamic acid dipeptide repeats protein	RERE	-2.18338	-2.0728	-3.88086	-2.9232	-5.09622	-6.52287	-3.34899	-2.09937	-2.79589	-2.06859	-3.54648	-3.99328	#NAME?	0.103903		0.804455	#NAME?	#NAME?		#NAME?	#NAME?
Q99714	3-hydroxyacyl-CoA dehydrogenase type-2	HSD17B10	4.14726	4.36676	4.66503	4.46738	4.85797	4.19878	5.67926	4.32804	4.28241	4.52069	6.57202	4.67468	#NAME?	0.0187188		0.558987	#NAME?	#NAME?		#NAME?	#NAME?
P34932	Heat shock 70 kDa protein 4	HSPA4	4.40461	4.26823	4.27771	4.54929	4.06776	4.58945	4.38642	4.21947	4.76884	4.70797	4.88373	5.15568	#NAME?	0.252269		0.32751	#NAME?	#NAME?		#NAME?	#NAME?
O43172	U4/U6 small nuclear ribonucleoprotein Prp4	PRPF4	2.70452	2.59779	2.52988	2.51992	2.75352	2.52055	2.81677	2.83743	2.5576	2.56891	3.96447	2.70175	#NAME?	0.00249815		0.303459	#NAME?	#NAME?		#NAME?	#NAME?
Q9BW60	Elongation of very long chain fatty acids protein 1	ELOVL1	-1.06871	-0.510642	-0.910192	-0.974137	-1.56998	-0.423263	-0.289216	-0.623768	-0.321955	-0.412934	-0.447215	-1.54371	#NAME?	0.777924		0.303021	#NAME?	#NAME?		#NAME?	#NAME?
Q6YN16	Hydroxysteroid dehydrogenase-like protein 2	HSDL2	1.91079	2.96407	3.19526	2.74334	1.02581	3.15746	3.57595	2.40211	2.98542	2.83979	3.49312	2.95881	#NAME?	0.160842		0.54308	#NAME?	#NAME?		#NAME?	#NAME?
Q96KP1	Exocyst complex component 2	EXOC2	-2.06845	-3.45589	-1.96628	-5.18959	-0.107977	-5.05095	0.524462	-1.78095	-2.60892	-3.46568	-0.790457	-4.03812	#NAME?	0.755765		0.946577	#NAME?	#NAME?		#NAME?	#NAME?
Q9Y2W1	Thyroid hormone receptor-associated protein 3	THRAP3	5.00453	2.3424	2.17006	2.38909	2.21064	1.99173	1.1205	4.42994	4.5836	4.60956	1.84619	4.88094	#NAME?	0.445108		0.893713	#NAME?	#NAME?		#NAME?	#NAME?
Q99547	M-phase phosphoprotein 6	MPHOSPH6	-0.848471	-1.07266	-1.16014	-0.722128	-0.265042	-1.16884	-1.26353	0.148889	0.0747081	0.00123532	-1.5149	0.267968	#NAME?	0.0953692		0.491944	#NAME?	#NAME?		#NAME?	#NAME?
Q9UBM7	7-dehydrocholesterol reductase	DHCR7	3.96986	3.87564	4.19683	4.04858	4.62738	4.35461	4.65918	3.99269	4.61338	4.59647	5.38388	4.20357	#NAME?	0.258452		0.396045	#NAME?	#NAME?		#NAME?	#NAME?
Q969Z0	FAST kinase domain-containing protein 4	TBRG4	1.55912	1.268	0.889833	1.38682	1.13486	1.50596	3.12679	0.819125	1.36256	1.44556	3.1606	1.32116	#NAME?	0.00825093		0.581868	#NAME?	#NAME?		#NAME?	#NAME?
P05141	ADP/ATP translocase 2	SLC25A5	5.68819	6.02499	5.81867	5.86573	6.222	6.28161	6.73641	5.5758	5.99385	6.14994	7.83727	6.6677	#NAME?	0.0188656		0.509965	#NAME?	#NAME?		#NAME?	#NAME?
Q9UNW1	Multiple inositol polyphosphate phosphatase 1	MINPP1	0.0635706	0.245436	-0.0279697	-0.00242162	0.310599	0.344276	0.154315	0.241369	0.81431	0.220721	0.744711	0.77177	#NAME?	0.178886		0.335618	#NAME?	#NAME?		#NAME?	#NAME?
Q8NBX0	Saccharopine dehydrogenase-like oxidoreductase	SCCPDH	2.23621	2.31299	2.31782	2.28651	1.97575	2.25617	2.05447	2.2054	2.55569	2.67738	3.17335	2.88339	#NAME?	0.0221876		0.360706	#NAME?	#NAME?		#NAME?	#NAME?
O75525	KH domain-containing, RNA-binding, signal transduction-associated protein 3	KHDRBS3	-1.24967	-1.22733	-1.54847	-1.24986	-1.62744	-2.08144	-2.01215	1.05805	0.119522	0.0371832	-2.35242	-1.69374	#NAME?	0.007053		0.690111	#NAME?	#NAME?		#NAME?	#NAME?
Q9UHA4	Ragulator complex protein LAMTOR3	LAMTOR3	-0.398361	-1.08153	-0.913365	-0.269758	-0.652285	-1.50928	-0.363732	0.138748	-0.458662	-0.136957	-1.25341	-0.122797	#NAME?	0.921319		0.437962	#NAME?	#NAME?		#NAME?	#NAME?
Q6ZN08	Putative zinc finger protein 66	ZNF66	0.287822	0.194484	-0.0420868	0.110369	0.369526	-0.504866	1.39253	0.553765	0.348753	0.106144	2.01763	-0.63233	#NAME?	0.0309882		0.561873	#NAME?	#NAME?		#NAME?	#NAME?
P50579	Methionine aminopeptidase 2	METAP2	1.4799	0.791918	0.474929	0.539455	-1.24537	1.04177	1.17149	1.0194	1.07536	1.05451	0.143341	1.1652	#NAME?	0.0804549		0.424451	#NAME?	#NAME?		#NAME?	#NAME?
O00471	Exocyst complex component 5	EXOC5	-1.74974	-2.1428	-0.646218	-0.655894	-1.78907	-0.622537	-0.527838	-1.46119	-0.0827781	-0.523648	-0.642778	-1.31328	#NAME?	0.544878		0.509124	#NAME?	#NAME?		#NAME?	#NAME?
O00264	Membrane-associated progesterone receptor component 1	PGRMC1	2.90601	2.66767	2.8718	2.87721	3.56595	3.47287	3.25564	2.74215	3.61441	3.45294	4.01654	3.67285	#NAME?	0.726107		0.398833	#NAME?	#NAME?		#NAME?	#NAME?
P22059	Oxysterol-binding protein 1	OSBP	0.728701	0.610151	0.65791	0.404077	0.765898	0.297198	1.11735	1.00569	0.416228	0.716424	1.5199	0.725987	#NAME?	0.139219		0.339608	#NAME?	#NAME?		#NAME?	#NAME?
Q6DKJ4	Nucleoredoxin	NXN	-0.514173	-0.300531	0.414665	-0.623136	-0.154571	-3.9781	0.637357	0.374203	0.797865	-1.11648	0.981008	-2.00505	#NAME?	0.588091		0.804125	#NAME?	#NAME?		#NAME?	#NAME?
O15498	Synaptobrevin homolog YKT6	YKT6	-1.26369	-0.900585	-1.1496	-1.14401	-1.38801	-1.02392	-0.325715	-0.244597	0.385404	-1.24134	-1.21704	-1.37444	#NAME?	0.00725952		0.475348	#NAME?	#NAME?		#NAME?	#NAME?
Q13523	Serine/threonine-protein kinase PRP4 homolog	PRPF4B	1.3452	1.00921	1.0525	0.830644	0.584726	0.267462	1.55087	0.575855	1.41955	1.55302	1.30922	0.992503	#NAME?	0.985903		0.385213	#NAME?	#NAME?		#NAME?	#NAME?
P53367	Arfaptin-1	ARFIP1	0.365036	-0.372308	-0.442316	-0.322436	0.210752	0.0187964	-0.393171	0.736021	0.868431	1.07715	-0.644375	0.686972	#NAME?	0.120849		0.478917	#NAME?	#NAME?		#NAME?	#NAME?
P31641	Sodium- and chloride-dependent taurine transporter	SLC6A6	-6.20177	-4.18785	-6.37028	-3.6896	-6.38408	-5.07556	-5.73272	-4.63743	-6.45152	-3.09448	-3.94036	-3.56572	#NAME?	0.840045		0.74782	#NAME?	#NAME?		#NAME?	#NAME?
Q6IQ23	Pleckstrin homology domain-containing family A member 7	PLEKHA7	-3.60743	-2.89777	-4.7802	-3.339	-6.44628	-6.5938	-3.385	-3.472	-2.3528	-2.32364	-6.81677	-4.10854	#NAME?	0.946337		0.867625	#NAME?	#NAME?		#NAME?	#NAME?
Q9Y676	28S ribosomal protein S18b, mitochondrial	MRPS18B	0.321294	0.35287	-0.212213	0.360721	-0.377137	-0.21199	0.162288	0.563185	0.0617759	0.709677	0.920713	0.0377259	#NAME?	0.848543		0.370303	#NAME?	#NAME?		#NAME?	#NAME?
P35241	Radixin	RDX	-0.43255	0.00116707	1.22826	0.720339	-0.241096	-0.110238	1.17007	0.0716907	0.199749	2.97854	0.597173	-0.0530996	#NAME?	0.230379		0.63304	#NAME?	#NAME?		#NAME?	#NAME?
P30043	Flavin reductase (NADPH)	BLVRB	1.74589	2.29318	2.4425	2.16279	1.89475	2.23388	2.41684	2.08099	2.41057	2.2675	2.91695	2.59073	#NAME?	0.839989		0.318428	#NAME?	#NAME?		#NAME?	#NAME?
Q8TAV3	Cytochrome P450 2W1	CYP2W1	1.77207	1.20089	0.899854	1.09453	0.984651	0.787378	1.30487	2.32136	0.976147	1.08833	1.51694	2.06957	#NAME?	0.356831		0.422973	#NAME?	#NAME?		#NAME?	#NAME?
Q9UPQ3	Arf-GAP with GTPase, ANK repeat and PH domain-containing protein 1	AGAP1	-3.73708	-2.90964	-3.13213	-2.67321	-3.00866	-1.63687	-2.84416	-1.90812	-3.18732	-2.18992	-1.87893	-2.0681	#NAME?	0.603004		0.503507	#NAME?	#NAME?		#NAME?	#NAME?
Q96HE7	ERO1-like protein alpha	ERO1A	3.23663	3.60285	3.59636	3.27063	3.81794	3.24094	4.12772	2.946	3.69675	3.96206	4.26515	4.05676	#NAME?	0.168706		0.381517	#NAME?	#NAME?		#NAME?	#NAME?
P55060	Exportin-2	CSE1L	8.61303	8.7606	7.71955	7.6641	9.19795	7.76675	8.23136	8.61136	8.96153	9.06732	8.60992	8.94671	#NAME?	0.131929		0.451036	#NAME?	#NAME?		#NAME?	#NAME?
O94925	Glutaminase kidney isoform, mitochondrial	GLS	2.69619	2.67378	2.70848	2.61097	2.6187	2.15806	3.39651	2.97273	2.50412	2.79778	3.25769	2.53581	#NAME?	0.240389		0.333076	#NAME?	#NAME?		#NAME?	#NAME?
Q8WZA9	Immunity-related GTPase family Q protein	IRGQ	-0.304237	-3.57435	-2.07103	-3.67251	-1.15309	-2.03066	-3.18803	-0.925583	0.844939	0.785013	-5.09478	0.508895	#NAME?	0.200387		0.956054	#NAME?	#NAME?		#NAME?	#NAME?
P15407	Fos-related antigen 1	FOSL1	-0.64821	-0.755234	-6.27853	-6.31904	-0.877209	-6.50808	-6.43845	-0.953354	-0.834802	-0.464881	-7.06398	-0.596802	#NAME?	0.969493		0.839005	#NAME?	#NAME?		#NAME?	#NAME?
Q9P1Z2	Calcium-binding and coiled-coil domain-containing protein 1	CALCOCO1	-0.960882	-5.07204	-4.15491	-2.92782	-2.28507	-3.88128	-2.21758	-0.457433	-3.17482	-3.4345	-4.04099	-1.16435	#NAME?	0.908332		0.798723	#NAME?	#NAME?		#NAME?	#NAME?
Q9UMS5	Putative homeodomain transcription factor 1	PHTF1	-5.03525	-6.34459	-6.39228	-6.37304	-6.54642	-6.37981	-3.86846	-6.13109	-6.46545	-6.37871	-4.11522	-6.44139	#NAME?	0.113244		0.611845	#NAME?	#NAME?		#NAME?	#NAME?
O75410	Transforming acidic coiled-coil-containing protein 1	TACC1	-3.24846	-2.91208	-3.32478	-3.43628	-2.61203	-2.41794	1.10289	-5.19325	-4.20263	-2.57154	1.00756	-2.42147	#NAME?	0.000980056		0.945521	#NAME?	#NAME?		#NAME?	#NAME?
Q92786	Prospero homeobox protein 1	PROX1	-1.55771	-3.44536	-1.42146	-1.58865	-2.25251	-1.71279	-2.43848	-1.25677	-0.449206	-0.835957	-3.20365	0.239989	#NAME?	0.282296		0.672402	#NAME?	#NAME?		#NAME?	#NAME?
Q15007	Pre-mRNA-splicing regulator WTAP	WTAP	0.332622	0.102521	-1.24521	0.30723	0.594308	0.721659	0.0659225	0.267365	0.682128	0.978988	0.647533	1.01787	#NAME?	0.195264		0.474445	#NAME?	#NAME?		#NAME?	#NAME?
P38646	Stress-70 protein, mitochondrial	HSPA9	5.60157	5.89406	5.90199	5.94629	6.29127	6.29208	7.5511	5.44818	5.86326	6.13125	7.91746	6.33942	#NAME?	0.0124117		0.553905	#NAME?	#NAME?		#NAME?	#NAME?
O00567	Nucleolar protein 56	NOP56	4.17822	3.97393	3.61753	4.00561	4.15531	3.93048	4.0132	3.97526	4.0082	4.29006	4.96175	4.68575	#NAME?	0.141954		0.345523	#NAME?	#NAME?		#NAME?	#NAME?
Q04206	Transcription factor p65	RELA	-0.0861295	-1.01902	-1.11413	1.54966	0.258836	-1.14757	-0.465814	-0.338087	1.37439	-0.0371479	0.748416	0.868512	#NAME?	0.449726		0.618106	#NAME?	#NAME?		#NAME?	#NAME?
O95983	Methyl-CpG-binding domain protein 3	MBD3	-2.17768	-1.90674	-2.40055	-2.20826	-2.08259	-3.01098	-0.956832	-2.9686	-1.62236	-3.08106	-0.772152	-0.893307	#NAME?	0.0447476		0.582081	#NAME?	#NAME?		#NAME?	#NAME?
Q9NVM9	Integrator complex subunit 13	INTS13	-1.67116	0.264398	-2.5271	-2.85443	-2.03644	-3.357	-4.34181	0.597177	-0.787424	-0.555623	-1.69227	-0.535688	#NAME?	0.542984		0.811016	#NAME?	#NAME?		#NAME?	#NAME?
O00443	Phosphatidylinositol 4-phosphate 3-kinase C2 domain-containing subunit alpha	PIK3C2A	-1.07847	-1.03591	-1.11843	-1.22996	-1.69525	-0.969845	-1.31876	0.866893	-0.640824	-0.495459	-1.07213	-1.4137	#NAME?	0.0235508		0.508982	#NAME?	#NAME?		#NAME?	#NAME?
O94808	Glutamine--fructose-6-phosphate aminotransferase [isomerizing] 2	GFPT2	-4.49506	-5.67236	-4.48492	-3.85526	-2.39113	-6.62541	-6.56758	-3.74865	-4.83854	-2.29505	-3.50287	-1.46635	#NAME?	0.646118		0.850851	#NAME?	#NAME?		#NAME?	#NAME?
Q14344	Guanine nucleotide-binding protein subunit alpha-13	GNA13	0.400284	0.357733	0.403482	0.257154	0.779027	0.139274	0.545395	0.28098	0.484469	0.463518	1.51074	0.666026	#NAME?	0.149347		0.269028	#NAME?	#NAME?		#NAME?	#NAME?
O75764	Transcription elongation factor A protein 3	TCEA3	1.35519	1.46644	1.53187	1.37382	1.57586	1.52682	0.743821	1.23048	4.16532	3.90825	1.33286	4.21446	#NAME?	5.17337e-06		1.12753	#NAME?	#NAME?		#NAME?	#NAME?
Q9BXB4	Oxysterol-binding protein-related protein 11	OSBPL11	-3.24017	-3.00602	-2.41561	-2.93678	-3.13412	-2.95739	0.20736	-3.08564	-2.85446	-3.0063	-0.0612491	-4.32501	#NAME?	0.000918338		0.760796	#NAME?	#NAME?		#NAME?	#NAME?
Q9UMS4	Pre-mRNA-processing factor 19	PRPF19	2.08968	2.00077	2.31324	1.78667	1.52825	1.87165	2.81226	1.64571	2.48917	1.93307	2.30659	2.55467	#NAME?	0.327175		0.358532	#NAME?	#NAME?		#NAME?	#NAME?
Q96Q42	Alsin	ALS2	-1.69769	-2.54153	0.8681	-1.23436	-1.27673	-0.493803	0.0115321	-1.4366	-1.72965	-0.000342811	0.26035	0.441737	#NAME?	0.639183		0.653841	#NAME?	#NAME?		#NAME?	#NAME?
Q96MW5	Conserved oligomeric Golgi complex subunit 8	COG8	-0.279223	-0.834282	-0.240043	-0.794468	-0.0817257	-1.31323	0.484607	-0.577976	-0.538518	-0.64216	0.37808	-0.103738	#NAME?	0.887706		0.423878	#NAME?	#NAME?		#NAME?	#NAME?
Q70CQ3	Ubiquitin carboxyl-terminal hydrolase 30	USP30	-6.05317	-6.23638	-4.4326	-4.14895	-6.45254	-4.02241	-4.22736	-4.79979	-4.9068	-4.82234	-3.98877	-5.10469	#NAME?	0.0544371		0.582718	#NAME?	#NAME?		#NAME?	#NAME?
Q8N668	COMM domain-containing protein 1	COMMD1	-6.12163	-2.91121	-5.58939	-2.97542	-2.94522	-3.56064	-6.35591	-5.92799	0.290267	0.339361	-6.93199	0.00323203	#NAME?	0.0653439		0.920081	#NAME?	#NAME?		#NAME?	#NAME?
Q9BV23	Monoacylglycerol lipase ABHD6	ABHD6	-3.51675	-3.63409	-4.31006	-6.36197	-3.17779	-6.55613	-6.60937	-2.32854	-6.51617	-2.41812	-3.725	-2.58076	#NAME?	0.519023		0.563139	#NAME?	#NAME?		#NAME?	#NAME?
Q2M3G4	Protein Shroom1	SHROOM1	-6.21778	-3.70517	-2.69355	-6.39722	-0.922549	-6.37685	0.697386	-6.05314	-2.31592	-6.29316	0.887522	-6.36629	#NAME?	0.390906		1.14492	#NAME?	#NAME?		#NAME?	#NAME?
O14976	Cyclin-G-associated kinase	GAK	-2.78231	-1.67847	-0.534798	-2.17888	-1.67931	-3.19675	-1.57401	-1.44506	-1.42027	-1.60316	-1.1504	-1.72177	#NAME?	0.00382181		0.522643	#NAME?	#NAME?		#NAME?	#NAME?
Q96K37	Solute carrier family 35 member E1	SLC35E1	-1.41792	-1.79197	-6.33068	-2.78116	-1.8664	-6.36646	-2.05668	-1.95318	-3.33255	-3.35735	-1.1095	-3.55422	#NAME?	0.0883445		0.865187	#NAME?	#NAME?		#NAME?	#NAME?
Q9P2J5	Leucine--tRNA ligase, cytoplasmic	LARS	1.6124	2.30424	2.0865	2.21673	2.18014	1.8428	2.8943	1.75499	2.23178	2.42987	3.2297	2.04647	#NAME?	0.13277		0.390719	#NAME?	#NAME?		#NAME?	#NAME?
Q9UHX1	Poly(U)-binding-splicing factor PUF60	PUF60	2.22939	0.369539	1.39977	0.534892	1.04654	0.371479	1.82811	1.86365	1.54276	1.0635	1.19661	1.2115	#NAME?	0.123303		0.459088	#NAME?	#NAME?		#NAME?	#NAME?
Q9UKD2	mRNA turnover protein 4 homolog	MRTO4	1.94329	1.3709	1.25631	2.07713	1.92102	2.30672	1.04288	2.60951	2.49242	2.55264	1.68331	2.44905	#NAME?	0.361693		0.325741	#NAME?	#NAME?		#NAME?	#NAME?
O15127	Secretory carrier-associated membrane protein 2	SCAMP2	1.23564	1.51999	1.26957	1.28702	1.71015	1.14794	1.54989	1.40377	1.61343	1.78797	1.65332	1.56773	#NAME?	0.288559		0.2343	#NAME?	#NAME?		#NAME?	#NAME?
Q9ULC3	Ras-related protein Rab-23	RAB23	-2.12963	-3.11997	-1.24244	-0.836812	-5.25616	-1.58117	-1.4233	-3.26018	-0.559736	-2.41787	-1.18242	-0.877127	#NAME?	0.333049		0.740924	#NAME?	#NAME?		#NAME?	#NAME?
P14854	Cytochrome c oxidase subunit 6B1	COX6B1	2.58523	2.90312	2.89791	2.34783	-6.61749	2.89783	3.28977	2.41037	2.50156	1.84771	1.99992	1.62555	#NAME?	0.00092452		1.11008	#NAME?	#NAME?		#NAME?	#NAME?
Q6ZWJ1	Syntaxin-binding protein 4	STXBP4	-3.38491	-2.77868	-2.52524	-2.97988	-1.55356	-3.54278	-5.45802	-0.0583545	-0.418737	-0.33305	-5.88608	1.32546	#NAME?	0.00622153		0.989382	#NAME?	#NAME?		#NAME?	#NAME?
Q9HA47	Uridine-cytidine kinase 1	UCK1	-3.20645	-6.18316	-6.34368	-1.88286	-6.61411	-6.47978	-3.00585	-6.16034	-6.48285	-2.51955	-2.85243	-6.39	#NAME?	0.925784		0.549837	#NAME?	#NAME?		#NAME?	#NAME?
Q8NCA5	Protein FAM98A	FAM98A	1.07105	1.10368	0.733363	0.959338	0.0321384	0.808493	0.675502	1.28294	2.07902	1.40187	1.12177	0.601063	#NAME?	0.511292		0.409017	#NAME?	#NAME?		#NAME?	#NAME?
Q92844	TRAF family member-associated NF-kappa-B activator	TANK	-2.25346	-2.22001	-3.24573	-2.30023	-2.6097	-3.71572	-2.80993	-3.63196	-1.7092	-1.92691	-1.49852	-1.61431	#NAME?	0.513239		0.525669	#NAME?	#NAME?		#NAME?	#NAME?
Q99460	26S proteasome non-ATPase regulatory subunit 1	PSMD1	3.37734	2.99545	3.00333	3.04913	2.91574	2.99151	3.16625	3.03199	2.9212	3.69415	3.65518	3.67868	#NAME?	0.11123		0.302491	#NAME?	#NAME?		#NAME?	#NAME?
O15056	Synaptojanin-2	SYNJ2	-2.24732	-0.849559	-2.36116	-1.34533	-5.70359	-2.5657	-1.26233	-3.13798	-1.09338	-0.902608	-1.50167	-2.73846	#NAME?	0.214684		0.739373	#NAME?	#NAME?		#NAME?	#NAME?
P54578	Ubiquitin carboxyl-terminal hydrolase 14	USP14	1.83136	1.97387	1.92769	1.78856	2.28126	1.81543	3.78229	2.06848	1.98836	2.02524	3.57749	1.33516	#NAME?	0.00217116		0.526478	#NAME?	#NAME?		#NAME?	#NAME?
Q9BPW8	Protein NipSnap homolog 1	NIPSNAP1	4.10231	3.81801	4.07546	4.03539	4.66067	4.02955	4.71328	3.96401	4.24585	4.36464	4.59363	4.68544	#NAME?	0.945905		0.307578	#NAME?	#NAME?		#NAME?	#NAME?
Q08380	Galectin-3-binding protein	LGALS3BP	1.41074	0.861731	1.69195	1.5278	1.51617	1.84487	2.04441	1.68504	1.45832	1.71062	1.93925	1.83221	#NAME?	0.310146		0.302767	#NAME?	#NAME?		#NAME?	#NAME?
Q9H3P7	Golgi resident protein GCP60	ACBD3	0.941209	0.142315	0.0728285	0.00726643	-0.0112203	-0.959099	2.82959	-0.38557	-0.779607	-1.26525	5.10029	-0.0295688	#NAME?	0.00724264		0.87943	#NAME?	#NAME?		#NAME?	#NAME?
Q15029	116 kDa U5 small nuclear ribonucleoprotein component	EFTUD2	2.99864	3.79865	2.44303	2.23134	1.52687	3.51913	2.68396	2.77207	2.96047	3.83745	3.33421	4.00884	#NAME?	0.37783		0.513223	#NAME?	#NAME?		#NAME?	#NAME?
Q01650	Large neutral amino acids transporter small subunit 1	SLC7A5	1.75517	2.0273	1.95035	2.36317	2.11003	2.20146	2.3493	1.77639	2.316	2.26853	3.06209	2.6429	#NAME?	0.144454		0.334621	#NAME?	#NAME?		#NAME?	#NAME?
Q9BSC4	Nucleolar protein 10	NOL10	-0.255048	0.0213427	0.186305	0.0471143	-0.550091	0.0888477	1.53879	0.0618208	-0.364969	-0.203626	1.37333	0.0184688	#NAME?	0.0296739		0.48089	#NAME?	#NAME?		#NAME?	#NAME?
P38432	Coilin	COIL	-0.126995	-0.704013	-0.317306	-1.0737	-0.145048	-1.21808	-0.461256	-0.415245	0.130513	0.27588	-0.735293	-0.078918	#NAME?	0.665603		0.38347	#NAME?	#NAME?		#NAME?	#NAME?
Q14678	KN motif and ankyrin repeat domain-containing protein 1	KANK1	0.585688	0.758492	-0.9588	-6.41753	-6.60637	-1.36267	-6.3742	0.431007	0.112668	0.177081	-4.1415	0.138327	#NAME?	0.771465		0.724096	#NAME?	#NAME?		#NAME?	#NAME?
P02679	Fibrinogen gamma chain	FGG	2.0535	1.81489	2.29021	2.39725	2.06119	2.73808	3.16808	1.84953	2.3954	1.97806	3.48568	3.05399	#NAME?	0.130566		0.429268	#NAME?	#NAME?		#NAME?	#NAME?
Q9UBV7	Beta-1,4-galactosyltransferase 7	B4GALT7	-2.88259	-2.45925	-2.57381	-3.2409	-3.30239	-2.82833	-2.60291	-2.54693	-2.5607	-2.88219	-2.41596	-2.53627	#NAME?	0.11045		0.290385	#NAME?	#NAME?		#NAME?	#NAME?
P36915	Guanine nucleotide-binding protein-like 1	GNL1	0.136126	-0.0845158	-0.266488	0.234008	-5.00855	0.0158194	-0.560311	0.0349013	-0.180336	0.180477	-0.290797	0.482825	#NAME?	0.00180259		0.773392	#NAME?	#NAME?		#NAME?	#NAME?
P48509	CD151 antigen	CD151	-0.211301	-0.51933	-0.987212	-1.31921	-2.82635	-1.71967	-0.319937	-0.832637	-1.73485	-1.15136	-0.0503485	-0.261465	#NAME?	0.422131		0.538744	#NAME?	#NAME?		#NAME?	#NAME?
Q9UFN0	Protein NipSnap homolog 3A	NIPSNAP3A	-3.24602	-3.21035	-1.98248	-3.02764	-2.86145	-3.35176	0.341397	-4.15831	-3.53303	-3.09341	0.060693	-2.81334	#NAME?	0.0107184		0.747282	#NAME?	#NAME?		#NAME?	#NAME?
P00414	Cytochrome c oxidase subunit 3	MT-CO3	-0.867448	-0.516143	-0.549141	-0.691653	-1.49208	-1.14045	-0.843775	-0.143689	0.217184	-0.472917	-0.843656	-0.923629	#NAME?	0.683111		0.374404	#NAME?	#NAME?		#NAME?	#NAME?
Q7Z569	BRCA1-associated protein	BRAP	-1.945	-2.94608	-2.35334	-3.37762	-1.95105	-1.61686	-2.85695	-2.03081	-0.158795	-0.654324	-3.24025	-1.65181	#NAME?	0.22757		0.599499	#NAME?	#NAME?		#NAME?	#NAME?
P51571	Translocon-associated protein subunit delta	SSR4	3.73383	3.95143	3.7157	3.44139	4.00157	4.65628	4.46062	3.75747	4.35747	4.0037	5.06727	4.13263	#NAME?	0.844925		0.379825	#NAME?	#NAME?		#NAME?	#NAME?
A1L0T0	Acetolactate synthase-like protein	ILVBL	1.68548	2.25175	2.15663	1.63488	-1.42898	1.67948	2.17161	1.33063	1.87806	2.04393	2.97499	1.34936	#NAME?	0.0978941		0.628223	#NAME?	#NAME?		#NAME?	#NAME?
O95870	Phosphatidylserine lipase ABHD16A	ABHD16A	-2.11518	-0.474345	-0.4554	-0.810388	-4.10949	-0.672856	-1.39504	-1.0486	-0.433803	-0.333555	-1.41727	-0.182617	#NAME?	0.0546596		0.637797	#NAME?	#NAME?		#NAME?	#NAME?
Q9NYP7	Elongation of very long chain fatty acids protein 5	ELOVL5	-0.684011	-1.04006	-1.43712	-1.52479	-1.2754	-0.93734	-0.4531	-1.28665	-0.410573	-0.607426	-0.388856	-1.94493	#NAME?	0.16003		0.301195	#NAME?	#NAME?		#NAME?	#NAME?
P46779	60S ribosomal protein L28	RPL28	3.92573	3.67632	3.75442	3.70882	3.96919	3.46306	3.6778	3.86151	4.14447	4.07099	4.68872	3.84407	#NAME?	0.172126		0.298335	#NAME?	#NAME?		#NAME?	#NAME?
Q6P6C2	RNA demethylase ALKBH5	ALKBH5	-0.289827	-2.24747	-1.9717	-1.17467	-0.270972	0.844581	0.618356	-0.299942	-1.52207	1.3102	-0.134331	-1.21118	#NAME?	0.851711		0.645181	#NAME?	#NAME?		#NAME?	#NAME?
O60832	H/ACA ribonucleoprotein complex subunit DKC1	DKC1	2.30386	2.24593	2.6596	2.34776	2.22422	2.25358	2.62522	2.2599	2.46568	2.5863	3.14785	2.57173	#NAME?	0.220043		0.270289	#NAME?	#NAME?		#NAME?	#NAME?
Q13137	Calcium-binding and coiled-coil domain-containing protein 2	CALCOCO2	-6.14592	-6.1606	-0.65684	-6.33295	-6.40744	-6.55976	-1.34343	-5.95811	-3.13369	-2.32966	-7.04281	-6.60511	#NAME?	0.920355		0.975116	#NAME?	#NAME?		#NAME?	#NAME?
Q8TDN6	Ribosome biogenesis protein BRX1 homolog	BRIX1	2.39046	2.63914	2.69706	2.45326	2.68586	2.49868	4.6765	2.24963	2.60741	2.52353	5.04031	2.46585	#NAME?	0.000128937		0.699793	#NAME?	#NAME?		#NAME?	#NAME?
Q96AP7	Endothelial cell-selective adhesion molecule	ESAM	-3.18699	-4.82238	-6.43966	-6.37607	-6.56034	-6.40527	-3.1426	-2.75426	-6.29929	-6.46275	-4.14535	-6.36199	#NAME?	0.622989		0.770746	#NAME?	#NAME?		#NAME?	#NAME?
Q9Y4P8	WD repeat domain phosphoinositide-interacting protein 2	WIPI2	-6.00585	-4.23585	-4.11527	-5.07953	-4.78733	-4.24376	-3.70259	-4.1567	-3.59426	-4.7561	-3.86812	-6.60089	#NAME?	0.344575		0.298159	#NAME?	#NAME?		#NAME?	#NAME?
Q13395	Probable methyltransferase TARBP1	TARBP1	-1.62675	-6.31234	-6.2976	-2.93244	-6.45302	-6.51229	-6.48896	-0.312059	-6.22539	-2.20872	-6.93551	-1.90934	#NAME?	0.555773		1.00908	#NAME?	#NAME?		#NAME?	#NAME?
Q8N5M4	Tetratricopeptide repeat protein 9C	TTC9C	-0.860499	0.224048	-0.575473	-0.657804	-0.174916	-0.523142	0.490514	-0.142027	-0.495037	-0.26091	0.783165	-0.561627	#NAME?	0.47466		0.396977	#NAME?	#NAME?		#NAME?	#NAME?
Q9UL25	Ras-related protein Rab-21	RAB21	0.901192	1.16357	0.537858	1.02791	1.58534	0.938208	1.65553	0.652173	1.33646	1.21998	1.69267	1.68453	#NAME?	0.72796		0.347876	#NAME?	#NAME?		#NAME?	#NAME?
Q8WWI5	Choline transporter-like protein 1	SLC44A1	-1.48235	-0.879145	-0.442287	-0.210551	-1.95312	0.747543	-0.170383	-1.0404	-0.032094	-0.915673	1.737	-0.235279	#NAME?	0.940452		0.593847	#NAME?	#NAME?		#NAME?	#NAME?
Q9H8M5	Metal transporter CNNM2	CNNM2	-4.47389	-4.45295	-4.6589	-4.35746	-6.46511	-4.83518	-6.55355	-2.6626	-4.40528	-4.50634	-4.16329	-3.12799	#NAME?	0.269885		0.637405	#NAME?	#NAME?		#NAME?	#NAME?
P01024	Complement C3	C3	3.96069	3.21709	2.50979	3.1438	4.39706	3.36631	4.89387	3.64549	3.11391	3.42962	4.91572	3.59881	#NAME?	0.738009		0.500448	#NAME?	#NAME?		#NAME?	#NAME?
P15586	N-acetylglucosamine-6-sulfatase	GNS	-0.45786	-0.246968	0.152898	0.272575	-0.704792	0.590958	0.965989	0.8527	0.378446	0.332173	-0.0935229	-0.375225	#NAME?	0.888686		0.408958	#NAME?	#NAME?		#NAME?	#NAME?
Q6UWP2	Dehydrogenase/reductase SDR family member 11	DHRS11	0.144594	0.295259	0.189342	0.398309	-1.3359	0.137888	0.457868	0.263746	0.365175	0.633822	0.457493	-0.949639	#NAME?	0.808993		0.233162	#NAME?	#NAME?		#NAME?	#NAME?
P37108	Signal recognition particle 14 kDa protein	SRP14	3.07235	2.61216	2.84944	2.96185	3.10221	2.74338	3.43211	3.38957	3.28897	3.40586	2.42682	2.96046	#NAME?	0.138396		0.260399	#NAME?	#NAME?		#NAME?	#NAME?
Q9ULH0	Kinase D-interacting substrate of 220 kDa	KIDINS220	-0.890473	-3.57217	1.43423	-5.09236	-6.42411	1.38892	-2.33697	-0.211722	-0.900999	-0.62224	-2.69395	-0.37483	#NAME?	0.024631		1.00254	#NAME?	#NAME?		#NAME?	#NAME?
Q8IV63	Inactive serine/threonine-protein kinase VRK3	VRK3	-4.34111	-6.33442	-5.28091	-6.3205	-5.18691	-5.32819	-3.22038	-3.552	-5.3299	-4.49455	-6.94014	-5.45078	#NAME?	0.219257		0.634049	#NAME?	#NAME?		#NAME?	#NAME?
P06681	Complement C2	C2	-0.39024	-1.68885	-1.27348	-0.792352	-0.0178852	-0.210965	1.79511	-2.80554	-0.441482	-0.409337	2.18421	-0.376537	#NAME?	0.0421737		0.720033	#NAME?	#NAME?		#NAME?	#NAME?
Q14676	Mediator of DNA damage checkpoint protein 1	MDC1	-0.660607	-0.754429	-0.834424	-1.44221	-1.16321	-1.04337	-1.03493	1.17973	0.088898	-0.011294	-1.8681	-1.03718	#NAME?	0.0121199		0.535894	#NAME?	#NAME?		#NAME?	#NAME?
Q06203	Amidophosphoribosyltransferase	PPAT	2.05425	0.400305	0.648642	0.616553	1.70861	0.284692	2.86584	1.8645	1.05268	1.16153	1.12171	0.7167	#NAME?	0.90647		0.511654	#NAME?	#NAME?		#NAME?	#NAME?
Q96N66	Lysophospholipid acyltransferase 7	MBOAT7	0.786353	0.431902	0.554936	1.13059	-1.00778	1.12238	-0.117525	1.17405	0.41828	0.955556	2.14296	1.60012	#NAME?	0.964881		0.525844	#NAME?	#NAME?		#NAME?	#NAME?
Q16543	Hsp90 co-chaperone Cdc37	CDC37	2.24754	2.31351	1.25602	1.6784	2.63192	2.00677	2.73682	2.549	2.06103	2.00815	2.44066	2.47566	#NAME?	0.257704		0.356194	#NAME?	#NAME?		#NAME?	#NAME?
Q96LJ7	Dehydrogenase/reductase SDR family member 1	DHRS1	-2.93288	-2.20472	-3.38098	-3.33487	-3.39767	-2.55267	-2.84146	-2.11566	-1.26751	-1.58225	-3.08372	-3.83274	#NAME?	0.16954		0.51341	#NAME?	#NAME?		#NAME?	#NAME?
P14625	Endoplasmin	HSP90B1	7.73726	7.78296	7.93544	7.73849	8.2209	7.90997	8.36433	7.53103	8.10751	8.07881	9.12444	8.27172	#NAME?	0.0402955		0.358805	#NAME?	#NAME?		#NAME?	#NAME?
Q86YS6	Ras-related protein Rab-43	RAB43	-1.85416	-1.73195	-2.73706	-2.40193	-1.3063	-1.53635	-1.21749	-1.74991	-1.02825	-1.48917	-1.11729	-2.45647	#NAME?	0.97807		0.418194	#NAME?	#NAME?		#NAME?	#NAME?
Q02127	Dihydroorotate dehydrogenase (quinone), mitochondrial	DHODH	-0.470856	-0.137482	-0.0696051	-0.233958	0.344402	-0.21851	-0.345414	-0.152052	0.200509	0.550545	0.519898	0.312737	#NAME?	0.531645		0.312039	#NAME?	#NAME?		#NAME?	#NAME?
Q12981	Vesicle transport protein SEC20	BNIP1	-1.21372	-1.13094	-1.39464	-1.34674	-0.830541	-4.83427	-1.03237	-1.28485	-1.1716	-0.745921	-0.81564	-1.87731	#NAME?	0.0125421		0.637195	#NAME?	#NAME?		#NAME?	#NAME?
Q96P70	Importin-9	IPO9	0.957653	-0.538438	-0.588198	-0.950887	-0.742136	-0.697323	-0.283402	-0.393274	-0.792983	-0.687949	1.90904	-0.378337	#NAME?	0.433138		0.322072	#NAME?	#NAME?		#NAME?	#NAME?
P83111	Serine beta-lactamase-like protein LACTB, mitochondrial	LACTB	-1.37984	-1.54752	-1.22651	-1.8647	-1.48504	-1.38226	-1.81549	-1.31823	-1.75063	0.846292	-1.30806	-0.493931	#NAME?	0.00430619		0.507636	#NAME?	#NAME?		#NAME?	#NAME?
Q8WV92	MIT domain-containing protein 1	MITD1	-2.92678	-3.80961	-3.08579	-3.67325	-6.40462	-3.36447	-1.50867	-2.4802	-1.93726	-2.07934	-4.08649	-6.54765	#NAME?	0.40491		0.770818	#NAME?	#NAME?		#NAME?	#NAME?
Q9NP79	Vacuolar protein sorting-associated protein VTA1 homolog	VTA1	2.17557	1.60874	1.55248	1.45685	2.19326	1.28703	2.16067	2.2501	2.20941	2.1929	1.85629	1.29808	#NAME?	0.945021		0.282254	#NAME?	#NAME?		#NAME?	#NAME?
Q9P0J6	39S ribosomal protein L36, mitochondrial	MRPL36	-0.193146	-0.424973	-0.818166	-0.951961	-6.50567	-1.57205	-0.0818827	-0.981939	-0.38045	-2.2315	-0.231817	-1.61768	#NAME?	0.0427661		0.823449	#NAME?	#NAME?		#NAME?	#NAME?
Q71UM5	40S ribosomal protein S27-like	RPS27L	3.82737	3.10528	3.07158	3.30521	3.25746	2.76283	3.55802	3.40067	3.39076	3.13092	4.06498	3.70032	#NAME?	0.83426		0.319324	#NAME?	#NAME?		#NAME?	#NAME?
Q9P000	COMM domain-containing protein 9	COMMD9	-2.9796	-6.24689	-3.68446	-6.25212	-6.42119	-6.61934	-4.73834	-5.01322	-3.38092	-6.46878	-3.2668	-5.06474	#NAME?	0.539343		0.711802	#NAME?	#NAME?		#NAME?	#NAME?
Q96A25	Transmembrane protein 106A	TMEM106A	-6.18335	-3.47525	-6.40093	-4.34417	-6.44848	-1.53391	0.0815119	-5.88914	-3.01684	-6.37302	-0.806873	-6.53248	#NAME?	0.413551		0.974875	#NAME?	#NAME?		#NAME?	#NAME?
Q8IWS0	PHD finger protein 6	PHF6	-2.87179	-2.74991	-6.27242	-6.33491	-6.46818	-6.63579	-2.93963	-2.45648	-2.28635	-6.42453	-6.92068	-6.36593	#NAME?	0.721275		0.656565	#NAME?	#NAME?		#NAME?	#NAME?
O60930	Ribonuclease H1	RNASEH1	-4.83863	-6.35292	-6.4692	-6.48065	-3.9901	-6.49489	-6.33554	-3.5273	-6.45262	-6.2321	-3.42422	-4.6435	#NAME?	0.56697		0.668517	#NAME?	#NAME?		#NAME?	#NAME?
Q1ED39	Lysine-rich nucleolar protein 1	KNOP1	-0.570542	-1.99898	-0.656117	-1.26597	-2.39619	-1.54575	-2.16768	-0.925285	-0.733803	-0.735979	-0.933766	-0.0349893	#NAME?	0.925009		0.483673	#NAME?	#NAME?		#NAME?	#NAME?
O14964	Hepatocyte growth factor-regulated tyrosine kinase substrate	HGS	1.52829	1.68259	1.62177	1.53961	1.68749	2.30398	0.723018	1.92567	1.62934	2.88175	2.29659	4.22771	#NAME?	0.00755158		0.553392	#NAME?	#NAME?		#NAME?	#NAME?
P42696	RNA-binding protein 34	RBM34	-1.0729	-0.498112	-1.95468	-1.33807	-0.382334	-1.27932	-0.986753	-0.340745	-0.0548124	-0.860205	-0.524713	-1.3152	#NAME?	0.618475		0.407165	#NAME?	#NAME?		#NAME?	#NAME?
P35611	Alpha-adducin	ADD1	0.791973	0.781499	0.869317	1.12852	1.2404	0.539823	2.84737	1.1447	0.571058	1.02697	2.48714	0.33167	#NAME?	0.00809836		0.509563	#NAME?	#NAME?		#NAME?	#NAME?
Q9BT22	Chitobiosyldiphosphodolichol beta-mannosyltransferase	ALG1	1.06262	1.08832	0.0555416	1.07207	1.43709	0.674745	0.486283	1.02175	1.81072	1.7717	1.80665	0.933314	#NAME?	0.714807		0.406672	#NAME?	#NAME?		#NAME?	#NAME?
Q9Y312	Protein AAR2 homolog	AAR2	-1.16359	-0.219426	-0.488035	-0.668986	-1.73131	-2.02598	0.202506	0.0228497	-1.7895	-1.16854	-0.00567371	-0.570367	#NAME?	0.842684		0.498101	#NAME?	#NAME?		#NAME?	#NAME?
A0A1B0GTL2	Uncharacterized protein C20orf204	C20orf204	-6.2473	-6.34709	-6.52972	-6.4561	-2.27006	-6.43799	-6.35364	-5.89446	-3.69065	-2.5635	-6.98223	-4.09966	#NAME?	0.958953		0.784017	#NAME?	#NAME?		#NAME?	#NAME?
Q96T76	MMS19 nucleotide excision repair protein homolog	MMS19	1.76833	2.43745	1.86214	2.18194	2.10434	2.33058	1.83901	1.70016	3.67955	3.36259	1.81215	3.12951	#NAME?	0.0166925		0.473031	#NAME?	#NAME?		#NAME?	#NAME?
Q5MIZ7	Serine/threonine-protein phosphatase 4 regulatory subunit 3B	PPP4R3B	-6.25435	-4.65211	-6.34496	-5.02161	-6.46256	-6.49712	-6.47445	-5.30577	-2.94173	-6.47558	-3.65593	-6.43763	#NAME?	0.177609		0.656935	#NAME?	#NAME?		#NAME?	#NAME?
Q9UGV2	Protein NDRG3	NDRG3	-0.655022	0.297613	0.431208	0.382252	-0.704616	-0.585415	0.730007	0.153219	-0.0517103	0.0299515	0.159947	0.351358	#NAME?	0.155559		0.367792	#NAME?	#NAME?		#NAME?	#NAME?
P21127	Cyclin-dependent kinase 11B	CDK11B	1.43856	0.624605	0.807187	0.680509	1.05891	0.317132	0.48442	1.20519	1.15611	1.48561	0.90266	1.86277	#NAME?	0.669996		0.361643	#NAME?	#NAME?		#NAME?	#NAME?
Q9BPX3	Condensin complex subunit 3	NCAPG	-1.41891	-0.776609	-1.28353	-1.87638	-2.04702	-0.481902	-1.26344	0.328052	0.20729	0.681928	-0.543197	-3.49943	#NAME?	0.0611022		0.632594	#NAME?	#NAME?		#NAME?	#NAME?
P18858	DNA ligase 1	LIG1	-1.45786	-0.982328	-0.739355	-0.644843	-0.936575	-1.27471	-1.87994	-0.0927099	1.32415	1.0717	-2.55742	-0.118556	#NAME?	0.0029817		0.630484	#NAME?	#NAME?		#NAME?	#NAME?
Q92599	Septin-8	SEPTIN8	1.59916	-0.91228	-2.5862	-1.16535	-1.6768	-3.48978	-2.25121	1.56571	0.290853	0.332668	-3.97775	0.802697	#NAME?	0.676278		0.832367	#NAME?	#NAME?		#NAME?	#NAME?
Q9BV40	Vesicle-associated membrane protein 8	VAMP8	0.928007	0.873807	1.34386	0.929758	0.89529	0.593244	4.02673	0.53372	0.516646	0.338401	3.58577	1.04691	#NAME?	0.000617733		0.747369	#NAME?	#NAME?		#NAME?	#NAME?
Q96HR3	Mediator of RNA polymerase II transcription subunit 30	MED30	-1.25407	0.0793625	1.05478	-6.26452	-0.0571768	-6.55471	-1.17751	0.23935	-1.98433	-2.14359	-0.760426	-1.40195	#NAME?	0.0100772		0.961313	#NAME?	#NAME?		#NAME?	#NAME?
Q00839	Heterogeneous nuclear ribonucleoprotein U	HNRNPU	5.41624	5.22237	5.05606	5.79387	5.70555	5.80667	5.48735	5.26141	5.80069	5.73788	6.3033	6.47759	#NAME?	0.415857		0.344578	#NAME?	#NAME?		#NAME?	#NAME?
Q9H2V7	Protein spinster homolog 1	SPNS1	-2.92867	-1.94216	-1.65603	-2.22457	-2.20798	-1.84589	-0.658767	-2.37813	-1.57973	-2.64479	-1.00464	-1.8712	#NAME?	0.255548		0.444672	#NAME?	#NAME?		#NAME?	#NAME?
P35030	Trypsin-3	PRSS3	-1.92425	-6.22304	-6.26002	-6.29914	-6.46053	-6.55187	-6.53405	-1.72354	-6.50045	-6.21283	-6.97379	-1.30034	#NAME?	0.439814		0.74564	#NAME?	#NAME?		#NAME?	#NAME?
Q9HAS0	Protein Njmu-R1	C17orf75	-1.73457	-1.75572	-2.24423	-1.7508	-2.88988	-1.41479	-0.267576	-1.5914	-2.17942	-2.70854	0.410047	-2.11674	#NAME?	0.0882535		0.556062	#NAME?	#NAME?		#NAME?	#NAME?
P25815	Protein S100-P	S100P	3.39896	3.28574	3.33634	3.23498	3.05234	2.34788	3.57016	3.31888	3.74947	3.12711	3.4934	3.22389	#NAME?	0.278625		0.304446	#NAME?	#NAME?		#NAME?	#NAME?
P52758	2-iminobutanoate/2-iminopropanoate deaminase	RIDA	1.38797	1.67189	1.35375	1.72842	1.36606	1.43743	3.07068	1.86951	2.153	2.25043	2.44456	0.104012	#NAME?	0.00120329		0.491115	#NAME?	#NAME?		#NAME?	#NAME?
Q86X95	Corepressor interacting with RBPJ 1	CIR1	-3.37707	-4.39184	-3.80802	-4.89796	-5.2417	-6.44184	-5.65777	-2.1757	-3.82704	-3.65005	-4.47635	-4.68189	#NAME?	0.884797		0.614937	#NAME?	#NAME?		#NAME?	#NAME?
Q8IWA4	Mitofusin-1	MFN1	-4.445	-4.77771	-6.44841	-6.28943	-4.49917	-3.92501	-6.38671	-2.67555	-2.26256	-2.65898	-6.95534	-4.93087	#NAME?	0.163778		0.752453	#NAME?	#NAME?		#NAME?	#NAME?
Q96I24	Far upstream element-binding protein 3	FUBP3	0.928436	1.23408	0.312495	1.55082	1.70414	1.53585	0.425256	1.80085	2.4947	2.60516	0.251246	2.90808	#NAME?	0.105752		0.536577	#NAME?	#NAME?		#NAME?	#NAME?
Q7L9B9	Endonuclease/exonuclease/phosphatase family domain-containing protein 1	EEPD1	-0.400447	-1.40026	-1.02889	-0.934722	-2.52704	-0.338834	-2.2021	-0.878151	0.360882	0.499935	-1.83021	1.0372	#NAME?	0.289184		0.602956	#NAME?	#NAME?		#NAME?	#NAME?
Q8TD22	Sideroflexin-5	SFXN5	-2.99016	-4.36471	-5.20416	-6.21203	-3.86751	-4.28698	-4.90559	-4.75388	-3.41379	-2.80066	-4.11031	-3.56386	#NAME?	0.516715		0.56291	#NAME?	#NAME?		#NAME?	#NAME?
Q9UGY1	Nucleolar protein 12	NOL12	-6.11442	-6.23203	-6.47925	-6.37611	-6.39109	-2.92411	-6.39276	-3.06318	-4.06686	-6.36585	-3.82321	-6.55672	#NAME?	0.804658		0.708071	#NAME?	#NAME?		#NAME?	#NAME?
Q9NYB0	Telomeric repeat-binding factor 2-interacting protein 1	TERF2IP	1.8769	0.0991008	0.295834	0.20017	-0.790391	-0.0686502	1.53514	1.34028	0.925257	0.788589	0.429821	-0.405939	#NAME?	0.625834		0.50003	#NAME?	#NAME?		#NAME?	#NAME?
Q96FV9	THO complex subunit 1	THOC1	0.238999	0.752065	0.515441	0.210376	0.375642	0.464673	1.593	0.793783	0.576629	1.02595	0.936782	-0.174012	#NAME?	0.0348123		0.365824	#NAME?	#NAME?		#NAME?	#NAME?
Q9NQ84	G-protein coupled receptor family C group 5 member C	GPRC5C	-0.383	-0.207603	-0.0444804	-0.296027	-0.28901	-0.24582	-1.30074	-2.00779	-1.32045	-1.50624	6.61719	-0.18434	#NAME?	5.59557e-07		0.293929	#NAME?	#NAME?		#NAME?	#NAME?
Q9H1B7	Probable E3 ubiquitin-protein ligase IRF2BPL	IRF2BPL	-2.22199	-3.31246	-3.34917	-2.74405	-2.12163	-4.36533	-1.88805	-2.46812	-2.35208	-1.62984	-3.01997	-3.74361	#NAME?	0.855678		0.502162	#NAME?	#NAME?		#NAME?	#NAME?
Q96HW7	Integrator complex subunit 4	INTS4	-5.2411	-3.45426	-1.2734	-2.90543	-6.53819	-1.97264	-1.0901	-4.21024	-3.15832	-4.34422	0.932257	-4.41008	#NAME?	0.844825		0.850718	#NAME?	#NAME?		#NAME?	#NAME?
O75449	Katanin p60 ATPase-containing subunit A1	KATNA1	-3.50663	0.711232	-6.42706	-6.21282	-4.6476	-6.54935	-3.32199	-3.96178	-3.84417	-4.12992	-4.56267	-1.63882	#NAME?	0.0474213		0.862146	#NAME?	#NAME?		#NAME?	#NAME?
Q96AT1	Uncharacterized protein KIAA1143	KIAA1143	-6.49659	-8.48458	-6.34344	-8.81789	-7.9718	-10.4489	-7.14343	-6.93323	-8.74474	-8.42195	-7.00596	-6.45135	#NAME?	0.276917		0.643759	#NAME?	#NAME?		#NAME?	#NAME?
Q8WXD5	Gem-associated protein 6	GEMIN6	-1.06711	-0.829747	-0.38943	-0.276094	-0.213325	-1.46306	-0.493709	-0.385857	-0.419878	-0.170356	0.0996312	-0.801928	#NAME?	0.302622		0.344446	#NAME?	#NAME?		#NAME?	#NAME?
P08727	Keratin, type I cytoskeletal 19	KRT19	2.1653	2.5122	1.45192	2.1937	2.91073	2.26025	2.46465	2.61563	2.83059	2.60156	2.68018	2.23574	#NAME?	0.0818843		0.322374	#NAME?	#NAME?		#NAME?	#NAME?
Q15155	Nodal modulator 1	NOMO1	-0.824223	-1.76496	-1.30534	-1.43745	-1.29215	-2.19438	-1.81346	-0.796465	-1.38135	-0.889026	-0.605092	-1.1641	#NAME?	0.905387		0.361501	#NAME?	#NAME?		#NAME?	#NAME?
O95292	Vesicle-associated membrane protein-associated protein B/C	VAPB	2.90199	2.40119	2.39516	2.43614	3.00934	2.13032	3.00863	2.65205	2.86257	2.60511	2.9786	2.773	#NAME?	0.147353		0.267638	#NAME?	#NAME?		#NAME?	#NAME?
Q13561	Dynactin subunit 2	DCTN2	2.41858	2.73982	2.62319	2.74584	2.96255	2.91122	5.08995	2.5531	2.54693	2.37315	4.75554	2.65372	#NAME?	0.00101542		0.595201	#NAME?	#NAME?		#NAME?	#NAME?
Q9BV68	E3 ubiquitin-protein ligase RNF126	RNF126	-1.77604	-1.37424	-1.25747	-1.03199	-6.57914	-0.355099	-2.10192	-2.66648	-0.108948	-0.381608	-2.94424	0.633283	#NAME?	0.38602		0.800677	#NAME?	#NAME?		#NAME?	#NAME?
Q8N9N2	Activating signal cointegrator 1 complex subunit 1	ASCC1	-6.22378	-6.24422	-6.4424	-6.44961	-6.35424	-6.40756	-6.50272	-6.08767	-6.3122	-6.24958	-6.80433	-2.64221	#NAME?	1.12773e-05		0.587181	#NAME?	#NAME?		#NAME?	#NAME?
P13010	X-ray repair cross-complementing protein 5	XRCC5	5.36757	4.89267	4.62988	4.72145	4.47957	4.50535	4.87022	5.08212	4.39252	4.89123	5.81052	5.68146	#NAME?	0.313822		0.355264	#NAME?	#NAME?		#NAME?	#NAME?
Q9BWT6	Meiotic nuclear division protein 1 homolog	MND1	3.65207	3.63449	3.2522	2.95302	3.33978	3.03463	3.73167	3.64881	3.25888	3.57755	3.72595	3.44268	#NAME?	0.330281		0.253224	#NAME?	#NAME?		#NAME?	#NAME?
Q2M218	Zinc finger protein 630	ZNF630	-2.45007	-0.992538	-6.53681	-6.24842	-6.62558	-6.51874	-6.5417	-1.96687	-6.41324	-1.35599	-6.96125	-1.98218	#NAME?	0.883477		0.691821	#NAME?	#NAME?		#NAME?	#NAME?
O94985	Calsyntenin-1	CLSTN1	-1.10032	-0.615252	-0.406516	-0.391952	-0.133625	-4.79295	-1.31808	-1.43517	-0.538107	0.227036	-1.39986	1.13387	#NAME?	0.277968		0.685052	#NAME?	#NAME?		#NAME?	#NAME?
Q96DM3	Regulator of MON1-CCZ1 complex	RMC1	-3.45831	-6.04229	-3.46614	-2.89453	-3.12623	-2.29511	1.78485	-4.69845	-4.9005	-5.39838	1.1015	-5.68348	#NAME?	0.0516668		0.58136	#NAME?	#NAME?		#NAME?	#NAME?
P40967	Melanocyte protein PMEL	PMEL	-2.84331	-2.0924	-2.24859	-6.44813	-2.81529	-6.42952	-2.02175	-2.59866	-3.10831	-3.73556	-3.88501	-3.24653	#NAME?	0.0338397		0.713572	#NAME?	#NAME?		#NAME?	#NAME?
Q15942	Zyxin	ZYX	-0.218927	0.141003	-0.120181	0.396772	-0.671632	-0.414946	0.739263	-0.864643	0.621966	0.313803	0.224041	0.298369	#NAME?	0.402463		0.370118	#NAME?	#NAME?		#NAME?	#NAME?
Q9NUB1	Acetyl-coenzyme A synthetase 2-like, mitochondrial	ACSS1	1.02249	1.08798	0.840524	1.00767	1.36812	1.07562	5.70917	0.508353	0.774859	0.777103	1.19146	1.53397	#NAME?	5.32372e-05		0.682087	#NAME?	#NAME?		#NAME?	#NAME?
P19525	Interferon-induced, double-stranded RNA-activated protein kinase	EIF2AK2	-0.864034	0.348659	0.978505	0.862439	-0.870839	0.567681	1.80748	0.204791	0.0613824	0.154066	2.35947	-0.117391	#NAME?	0.615109		0.574564	#NAME?	#NAME?		#NAME?	#NAME?
P15151	Poliovirus receptor	PVR	-1.42264	0.109695	0.225366	-0.513095	-0.430316	-0.873924	-0.670624	-1.92947	0.653587	0.824871	0.157405	1.25775	#NAME?	0.18327		0.533072	#NAME?	#NAME?		#NAME?	#NAME?
Q9HD20	Manganese-transporting ATPase 13A1	ATP13A1	0.263636	0.17276	0.474709	0.678188	0.380888	2.63	0.621352	0.38816	1.11477	1.19428	1.93765	2.36027	#NAME?	0.66266		0.502719	#NAME?	#NAME?		#NAME?	#NAME?
Q9NPC3	E3 ubiquitin-protein ligase CCNB1IP1	CCNB1IP1	-6.18491	-6.24603	-4.07169	-6.34176	-6.55615	-6.57487	-6.51009	-6.12882	-6.46091	-3.68941	-6.87799	-3.40249	#NAME?	0.316347		0.484288	#NAME?	#NAME?		#NAME?	#NAME?
P08574	Cytochrome c1, heme protein, mitochondrial	CYC1	2.75464	2.95255	3.13783	3.05032	3.67854	3.21287	3.09397	2.72862	3.63771	3.52125	3.82478	3.94342	#NAME?	0.406878		0.327165	#NAME?	#NAME?		#NAME?	#NAME?
P07942	Laminin subunit beta-1	LAMB1	1.10125	-0.0522373	-1.0125	-0.167004	0.507105	0.296491	-0.340699	0.979899	1.06773	0.901132	-0.955182	1.1762	#NAME?	0.631645		0.35933	#NAME?	#NAME?		#NAME?	#NAME?
Q86WU2	Probable D-lactate dehydrogenase, mitochondrial	LDHD	-1.95109	-2.98758	-6.49207	-3.82344	-3.5841	-4.04625	-4.46568	-1.16969	-3.41354	-5.8825	-2.22342	-1.30681	#NAME?	0.655556		0.737146	#NAME?	#NAME?		#NAME?	#NAME?
Q9UHJ6	Sedoheptulokinase	SHPK	1.76608	1.5708	1.6811	1.77876	1.52027	1.61101	2.45575	1.55023	1.81701	1.64554	2.6905	1.66351	#NAME?	0.00466562		0.315754	#NAME?	#NAME?		#NAME?	#NAME?
Q9BW27	Nuclear pore complex protein Nup85	NUP85	0.672971	0.908933	-0.259945	-0.481041	-0.560542	1.07755	1.16714	0.0632657	0.736389	0.320122	1.96277	-0.07554	#NAME?	0.934884		0.469372	#NAME?	#NAME?		#NAME?	#NAME?
Q9BQ67	Glutamate-rich WD repeat-containing protein 1	GRWD1	-0.208459	-0.437531	-0.23675	-0.0844022	-1.48141	0.149696	0.123796	-0.448039	0.0489583	-0.0769354	0.182501	-0.0706397	#NAME?	0.0615192		0.343083	#NAME?	#NAME?		#NAME?	#NAME?
P04075	Fructose-bisphosphate aldolase A	ALDOA	7.80262	7.54644	7.4936	7.59907	7.16614	7.46119	8.36362	8.04986	8.03493	7.89909	7.67186	6.94077	#NAME?	0.0835266		0.315179	#NAME?	#NAME?		#NAME?	#NAME?
Q9NPD3	Exosome complex component RRP41	EXOSC4	1.01332	0.380055	0.332595	0.44343	0.650732	-0.109054	1.17545	1.07308	0.490492	0.815963	1.36256	-0.0907454	#NAME?	0.445565		0.352619	#NAME?	#NAME?		#NAME?	#NAME?
Q8IYI6	Exocyst complex component 8	EXOC8	-1.49284	-0.542606	-2.19531	-1.8049	-1.66036	0.409529	0.139187	-0.433395	-0.777362	-1.06869	-0.314568	-1.86221	#NAME?	0.485617		0.494909	#NAME?	#NAME?		#NAME?	#NAME?
Q9H2D1	Mitochondrial folate transporter/carrier	SLC25A32	-1.34373	-0.654811	-0.571173	-0.377594	-0.156068	-0.453596	0.709114	-0.817625	-3.09949	0.029218	0.592273	0.638401	#NAME?	0.0131814		0.268144	#NAME?	#NAME?		#NAME?	#NAME?
Q9P003	Protein cornichon homolog 4	CNIH4	-0.727484	2.08706	2.7857	2.3537	2.44933	2.53508	2.68459	2.40014	2.16859	2.39539	2.51138	2.55504	#NAME?	0.000436668		0.538624	#NAME?	#NAME?		#NAME?	#NAME?
Q9BUB7	Transmembrane protein 70, mitochondrial	TMEM70	0.386808	-0.0172078	-1.48068	-0.255748	0.82795	0.0826309	0.0348564	0.416864	0.439618	0.546708	0.464744	0.0976029	#NAME?	0.0124152		0.409441	#NAME?	#NAME?		#NAME?	#NAME?
Q9NQ55	Suppressor of SWI4 1 homolog	PPAN	0.4182	0.508489	0.539905	0.440938	0.341079	0.194199	0.664822	0.130317	0.705712	0.810544	1.0073	0.546236	#NAME?	0.0833847		0.23702	#NAME?	#NAME?		#NAME?	#NAME?
P21281	V-type proton ATPase subunit B, brain isoform	ATP6V1B2	2.78697	2.31679	2.24672	2.35477	1.53557	2.35832	1.44619	2.81342	2.88953	2.7437	2.41837	2.54251	#NAME?	0.562705		0.209099	#NAME?	#NAME?		#NAME?	#NAME?
Q8NBF2	NHL repeat-containing protein 2	NHLRC2	1.39952	0.819924	1.18503	1.07132	0.948693	0.821493	1.12758	1.25345	2.37256	2.52689	0.883884	0.573699	#NAME?	0.0145029		0.415346	#NAME?	#NAME?		#NAME?	#NAME?
Q96DI7	U5 small nuclear ribonucleoprotein 40 kDa protein	SNRNP40	1.8288	1.40353	1.20875	0.926202	1.76911	0.967805	1.37318	1.3693	1.93176	1.3609	1.84518	2.04744	#NAME?	0.685478		0.303928	#NAME?	#NAME?		#NAME?	#NAME?
Q9H147	Deoxynucleotidyltransferase terminal-interacting protein 1	DNTTIP1	-5.92477	-5.86706	-7.43189	-6.48264	-5.15139	-5.26223	-3.26066	-6.47334	-6.45359	-5.34391	-4.51214	-6.62284	#NAME?	0.326595		0.575581	#NAME?	#NAME?		#NAME?	#NAME?
P28300	Protein-lysine 6-oxidase	LOX	0.845815	1.21381	1.4962	1.36926	0.0412371	0.742044	0.946853	0.253466	1.4183	1.43698	2.57778	1.63862	#NAME?	0.440264		0.427274	#NAME?	#NAME?		#NAME?	#NAME?
O94905	Erlin-2	ERLIN2	1.52804	1.14959	1.66105	1.39428	1.26654	1.47268	1.11645	1.48475	1.80428	2.16089	1.47507	2.1305	#NAME?	0.102304		0.283293	#NAME?	#NAME?		#NAME?	#NAME?
Q96HS1	Serine/threonine-protein phosphatase PGAM5, mitochondrial	PGAM5	1.94129	3.3281	3.28576	3.22842	3.59795	3.03707	4.44721	2.00834	3.72128	3.58677	4.49052	2.97646	#NAME?	0.314895		0.468666	#NAME?	#NAME?		#NAME?	#NAME?
Q9NZT2	Opioid growth factor receptor	OGFR	0.779591	0.482231	1.04028	0.784351	0.837646	0.350601	1.37282	0.417452	0.391026	0.830342	2.27501	1.30838	#NAME?	0.0393205		0.386722	#NAME?	#NAME?		#NAME?	#NAME?
Q8NFQ8	Torsin-1A-interacting protein 2	TOR1AIP2	0.637994	0.182369	-1.66617	-0.607221	0.20581	-1.05771	0.178488	1.12153	0.683762	-0.165441	-1.69771	0.690237	#NAME?	0.778079		0.519297	#NAME?	#NAME?		#NAME?	#NAME?
Q9UBK9	Protein UXT	UXT	-0.826158	-3.67314	-4.34456	-3.07751	-2.62277	-6.59591	-3.00763	-4.08475	-3.25263	-1.26372	-3.9521	-1.39273	#NAME?	0.350815		0.697745	#NAME?	#NAME?		#NAME?	#NAME?
Q13724	Mannosyl-oligosaccharide glucosidase	MOGS	3.29914	2.18126	2.79639	2.10798	2.82223	2.7424	1.80574	3.13524	3.28268	3.55473	2.83463	3.7013	#NAME?	0.370336		0.394153	#NAME?	#NAME?		#NAME?	#NAME?
Q6XZF7	Dynamin-binding protein	DNMBP	-2.08126	-2.56507	-6.25472	-3.01266	-1.74348	-6.6395	-2.40526	-2.50819	-6.2319	-5.59294	-1.81497	-1.71686	#NAME?	0.86648		0.337762	#NAME?	#NAME?		#NAME?	#NAME?
P45954	Short/branched chain specific acyl-CoA dehydrogenase, mitochondrial	ACADSB	5.02854	4.90384	4.94055	4.64471	5.50649	4.88675	6.16816	4.9324	5.22513	5.26621	5.34245	4.86385	#NAME?	0.305529		0.314554	#NAME?	#NAME?		#NAME?	#NAME?
P16422	Epithelial cell adhesion molecule	EPCAM	1.87945	1.95536	1.773	1.92597	-6.44906	1.47812	1.498	1.1958	1.38711	1.20675	1.46527	1.08692	#NAME?	3.16707e-06		0.8795	#NAME?	#NAME?		#NAME?	#NAME?
O75251	NADH dehydrogenase [ubiquinone] iron-sulfur protein 7, mitochondrial	NDUFS7	0.153727	1.16376	0.834037	0.632754	1.37423	0.82228	1.30367	0.330979	1.30896	1.1707	2.37958	0.823131	#NAME?	0.326301		0.389373	#NAME?	#NAME?		#NAME?	#NAME?
Q00059	Transcription factor A, mitochondrial	TFAM	2.37688	2.86469	2.566	2.7417	3.53021	2.86831	4.24049	2.38284	3.30813	2.76336	4.86967	2.25461	#NAME?	0.0494873		0.478554	#NAME?	#NAME?		#NAME?	#NAME?
Q9BWF3	RNA-binding protein 4	RBM4	-0.740378	0.759992	0.411531	0.217005	0.597992	0.299363	3.7897	-1.02423	-0.66535	-0.642839	3.28431	-0.489093	#NAME?	0.00700363		0.451167	#NAME?	#NAME?		#NAME?	#NAME?
P36776	Lon protease homolog, mitochondrial	LONP1	2.18829	2.12903	2.03563	1.87344	2.62794	2.79123	-0.462555	3.18267	2.83708	2.82776	2.75584	3.46428	#NAME?	0.00814551		0.159915	#NAME?	#NAME?		#NAME?	#NAME?
Q9BT17	Mitochondrial ribosome-associated GTPase 1	MTG1	-0.470452	-0.442303	-0.654298	-0.18385	-0.246206	0.391033	2.84921	-0.226314	-1.40262	-1.79847	2.75474	0.202344	#NAME?	0.00191842		0.664161	#NAME?	#NAME?		#NAME?	#NAME?
Q96A65	Exocyst complex component 4	EXOC4	-0.765159	-3.36342	-1.43415	-2.2568	-1.63008	-0.509606	-1.87963	-1.85419	-0.414914	-0.78969	-1.75713	-0.225393	#NAME?	0.512377		0.506376	#NAME?	#NAME?		#NAME?	#NAME?
Q9BSH4	Translational activator of cytochrome c oxidase 1	TACO1	1.16179	1.91098	1.65612	1.12221	1.7002	0.725256	1.95818	0.843302	1.78708	1.73443	1.58583	1.88881	#NAME?	0.841158		0.253516	#NAME?	#NAME?		#NAME?	#NAME?
Q96BW9	Phosphatidate cytidylyltransferase, mitochondrial	TAMM41	-1.16789	-1.49594	-1.99122	-1.87788	-1.28604	-1.95372	-1.99235	-0.677766	-1.18044	-1.35257	-1.72469	-0.842539	#NAME?	0.47495		0.333724	#NAME?	#NAME?		#NAME?	#NAME?
Q9NVQ4	Fas apoptotic inhibitory molecule 1	FAIM	-6.28571	-2.08145	-5.05821	-6.40454	-6.39622	-2.41544	0.254861	-5.91753	-6.50851	-6.22395	0.687727	-6.51945	#NAME?	0.253667		0.735789	#NAME?	#NAME?		#NAME?	#NAME?
Q14997	Proteasome activator complex subunit 4	PSME4	-1.00329	-1.28898	-0.681088	-1.9143	-1.44026	-1.70151	1.16032	-0.682596	-1.72065	-1.81996	0.269813	-2.06685	#NAME?	0.0363499		0.528252	#NAME?	#NAME?		#NAME?	#NAME?
Q9NU22	Midasin	MDN1	1.43037	-0.772084	-0.510089	-0.820207	-1.08526	-1.18627	-1.50992	0.779907	0.627666	0.597181	-0.793385	0.440461	#NAME?	0.952437		0.514242	#NAME?	#NAME?		#NAME?	#NAME?
Q9H3K2	Growth hormone-inducible transmembrane protein	GHITM	0.973356	0.724691	-0.211395	0.712228	0.534429	0.346282	0.985587	0.508419	0.933389	0.609381	1.82447	0.311712	#NAME?	0.577314		0.348895	#NAME?	#NAME?		#NAME?	#NAME?
Q8WZ82	Esterase OVCA2	OVCA2	-3.04089	-3.33686	-3.35027	-3.4539	-7.03972	-3.02709	-2.22893	-2.94449	-3.07347	-4.39109	-2.4497	-4.51041	#NAME?	0.319311		0.608442	#NAME?	#NAME?		#NAME?	#NAME?
Q9UN37	Vacuolar protein sorting-associated protein 4A	VPS4A	0.912312	0.657591	1.00933	0.960575	0.961719	0.747561	2.31551	1.10494	0.763813	0.78595	0.97501	1.31285	#NAME?	0.00728154		0.334829	#NAME?	#NAME?		#NAME?	#NAME?
Q9NUQ7	Ufm1-specific protease 2	UFSP2	0.391635	0.337494	-1.39228	-0.641253	0.318165	-0.961695	1.33739	-0.0213755	-0.708557	-0.624912	2.23127	-0.904897	#NAME?	0.295939		0.542808	#NAME?	#NAME?		#NAME?	#NAME?
Q96LW7	Caspase recruitment domain-containing protein 19	CARD19	-2.77311	-2.49723	-2.82555	-3.5452	-4.31511	-6.57547	-3.54901	-2.08529	-4.34479	-3.37972	-2.32407	-3.30884	#NAME?	0.208556		0.589993	#NAME?	#NAME?		#NAME?	#NAME?
Q8NDF8	Terminal nucleotidyltransferase 4B	TENT4B	-3.44861	-2.42545	-3.8888	-2.03482	-4.08086	-1.23974	-2.65992	-3.05821	-2.97951	-2.59803	-1.28795	-1.43524	#NAME?	0.43005		0.516569	#NAME?	#NAME?		#NAME?	#NAME?
Q13547	Histone deacetylase 1	HDAC1	1.71497	1.70743	1.07482	1.73302	1.79774	2.12662	2.13853	1.94228	1.83751	1.81234	2.149	1.78187	#NAME?	0.133767		0.251153	#NAME?	#NAME?		#NAME?	#NAME?
Q9UBP0	Spastin	SPAST	-3.70118	-6.5711	-4.82268	-4.67224	-3.19393	-7.52071	-5.42123	-3.94958	-3.51236	-4.37376	-4.63271	-4.98903	#NAME?	0.0766838		0.600527	#NAME?	#NAME?		#NAME?	#NAME?
P78332	RNA-binding protein 6	RBM6	-0.713173	-2.42595	-2.46412	-1.82418	0.0121958	-4.55416	-3.62881	-0.745509	-0.272934	-0.119145	-3.94896	-0.647098	#NAME?	0.844717		0.43449	#NAME?	#NAME?		#NAME?	#NAME?
Q86V48	Leucine zipper protein 1	LUZP1	1.58727	0.220961	-0.49441	0.978935	1.70574	1.35681	0.211011	1.58554	2.20954	2.30713	-0.142315	2.30806	#NAME?	0.60134		0.52061	#NAME?	#NAME?		#NAME?	#NAME?
Q9BY50	Signal peptidase complex catalytic subunit SEC11C	SEC11C	0.147757	0.591897	0.506124	0.503188	1.14767	0.13084	0.431799	1.07855	0.770598	1.06357	0.652346	0.678699	#NAME?	0.415761		0.274683	#NAME?	#NAME?		#NAME?	#NAME?
Q16698	2,4-dienoyl-CoA reductase, mitochondrial	DECR1	2.77571	1.76494	2.25602	3.09857	1.82652	2.5102	2.01573	2.4733	4.44776	3.29463	2.38746	2.26948	#NAME?	0.256837		0.442733	#NAME?	#NAME?		#NAME?	#NAME?
Q96CD0	F-box/LRR-repeat protein 8	FBXL8	-6.16905	-3.9303	-3.78979	-4.18766	-6.53589	-3.1195	-2.5689	-4.23254	-4.61204	-4.67809	-1.5282	-6.15849	#NAME?	0.712033		0.658989	#NAME?	#NAME?		#NAME?	#NAME?
Q92466	DNA damage-binding protein 2	DDB2	-2.31039	-2.10011	-1.6626	-1.5765	-1.59272	-2.64726	0.351348	-1.19089	-2.06858	-1.49279	-0.200727	-3.91872	#NAME?	0.0178349		0.561538	#NAME?	#NAME?		#NAME?	#NAME?
Q03426	Mevalonate kinase	MVK	2.13566	2.08429	2.38827	2.02242	2.04901	1.9157	2.3657	2.44196	2.07409	2.43059	2.46984	2.01405	#NAME?	0.619832		0.200148	#NAME?	#NAME?		#NAME?	#NAME?
Q8N4P3	Guanosine-3',5'-bis(diphosphate) 3'-pyrophosphohydrolase MESH1	HDDC3	-0.459837	-0.314635	-2.44394	-0.428581	-0.599592	-1.10034	-0.980097	-0.384659	0.0728843	-0.281163	-0.87307	-0.477931	#NAME?	0.134539		0.403815	#NAME?	#NAME?		#NAME?	#NAME?
Q9NUQ2	1-acyl-sn-glycerol-3-phosphate acyltransferase epsilon	AGPAT5	0.938098	0.674905	0.15787	1.04337	1.14025	1.10105	0.591996	0.575127	1.39928	1.2644	1.56403	1.58766	#NAME?	0.648475		0.321162	#NAME?	#NAME?		#NAME?	#NAME?
Q9NT62	Ubiquitin-like-conjugating enzyme ATG3	ATG3	-1.2935	-1.34985	-2.28645	-1.45827	-0.890033	-1.54726	-2.17588	-0.972973	-0.369394	-0.496513	-1.64008	-0.845302	#NAME?	0.381694		0.387538	#NAME?	#NAME?		#NAME?	#NAME?
Q9UKK9	ADP-sugar pyrophosphatase	NUDT5	2.27048	2.19086	1.63944	1.47153	0.689341	1.76076	2.99255	2.21979	1.29193	1.96154	2.75515	1.26003	#NAME?	0.62193		0.409762	#NAME?	#NAME?		#NAME?	#NAME?
O95479	GDH/6PGL endoplasmic bifunctional protein	H6PD	1.52154	2.49805	2.22329	1.2157	1.99374	1.2284	1.1628	1.65452	2.80583	2.81951	1.78895	2.89847	#NAME?	0.490954		0.408227	#NAME?	#NAME?		#NAME?	#NAME?
P17936	Insulin-like growth factor-binding protein 3	IGFBP3	-2.6663	-2.86079	-3.55528	-2.50693	-1.89635	-1.53915	-4.18493	-2.86794	-1.66287	-1.38038	-1.22842	-0.463561	#NAME?	0.194763		0.539451	#NAME?	#NAME?		#NAME?	#NAME?
Q96GM5	SWI/SNF-related matrix-associated actin-dependent regulator of chromatin subfamily D member 1	SMARCD1	-0.114394	-3.0548	-4.40161	0.788576	-2.59304	-0.61068	-0.255685	-0.888937	-0.770148	-0.936797	2.25488	-4.72686	#NAME?	0.804011		0.777066	#NAME?	#NAME?		#NAME?	#NAME?
Q6IBS0	Twinfilin-2	TWF2	1.65989	1.21469	0.690187	1.13977	1.57005	1.20252	1.80622	1.62303	1.33527	1.16752	1.41346	1.69881	#NAME?	0.451446		0.261202	#NAME?	#NAME?		#NAME?	#NAME?
Q13907	Isopentenyl-diphosphate Delta-isomerase 1	IDI1	1.77777	1.62165	1.66906	1.43397	0.884766	2.79343	3.18911	2.85557	1.78533	2.26151	1.31814	1.31503	#NAME?	0.619403		0.424007	#NAME?	#NAME?		#NAME?	#NAME?
O15084	Serine/threonine-protein phosphatase 6 regulatory ankyrin repeat subunit A	ANKRD28	-0.788839	0.265683	0.477074	-1.2626	-1.74014	-3.83897	-1.1605	-1.55868	-0.0372191	-0.258117	-1.28068	0.955334	#NAME?	0.295065		0.591323	#NAME?	#NAME?		#NAME?	#NAME?
Q9NRQ2	Phospholipid scramblase 4	PLSCR4	-3.22014	-4.55023	-4.47307	-4.52723	-4.05764	-5.1181	-6.62237	-2.52902	-2.96247	-2.56888	-6.76794	-2.91109	#NAME?	0.022876		0.264108	#NAME?	#NAME?		#NAME?	#NAME?
Q6P3X3	Tetratricopeptide repeat protein 27	TTC27	-1.11402	-0.927378	-1.17488	-1.41361	0.0571367	-0.874543	-1.26694	-0.81715	0.354238	0.329454	-1.8539	0.487778	#NAME?	0.171809		0.446794	#NAME?	#NAME?		#NAME?	#NAME?
Q9UBQ5	Eukaryotic translation initiation factor 3 subunit K	EIF3K	2.11824	2.42409	1.93669	2.36764	0.949755	1.97115	2.77117	2.23371	2.43333	2.03043	2.75733	1.60189	#NAME?	0.715795		0.343383	#NAME?	#NAME?		#NAME?	#NAME?
P29803	Pyruvate dehydrogenase E1 component subunit alpha, testis-specific form, mitochondrial	PDHA2	-2.79934	-6.20882	-4.17882	-6.34665	-6.36299	-3.64091	-2.66438	-2.50002	-6.44423	-6.30389	-2.36575	-6.40779	#NAME?	0.5299		0.475245	#NAME?	#NAME?		#NAME?	#NAME?
O95425	Supervillin	SVIL	0.146501	-1.91655	-0.713025	-3.30549	-2.43827	-2.38774	-2.77879	-0.0527507	-0.298776	-0.136002	-2.51715	-1.39368	#NAME?	0.94838		0.572906	#NAME?	#NAME?		#NAME?	#NAME?
Q13200	26S proteasome non-ATPase regulatory subunit 2	PSMD2	2.20501	2.91653	3.02173	3.18883	3.25915	3.70307	4.38375	2.75805	2.33645	4.8094	4.86419	2.12221	#NAME?	0.0576831		0.496622	#NAME?	#NAME?		#NAME?	#NAME?
Q5VYS8	Terminal uridylyltransferase 7	TUT7	-6.00444	-3.4962	-3.74949	-6.3344	-6.43906	-6.46773	-1.75178	-6.10238	-6.46126	-6.26713	-2.10047	-6.49182	#NAME?	0.307741		0.552748	#NAME?	#NAME?		#NAME?	#NAME?
Q4G148	Glucoside xylosyltransferase 1	GXYLT1	-1.59724	-3.03271	-3.13888	-2.5253	-2.3798	-2.93472	-2.39466	-1.89275	-2.56232	-1.11868	-2.60879	-2.76168	#NAME?	0.874996		0.378294	#NAME?	#NAME?		#NAME?	#NAME?
Q9Y535	DNA-directed RNA polymerase III subunit RPC8	POLR3H	-6.0997	-6.19066	-3.75985	-6.39922	-3.45943	-6.63077	-6.59199	-5.97018	-3.32584	-2.82862	-6.95875	-2.79816	#NAME?	0.493469		0.677678	#NAME?	#NAME?		#NAME?	#NAME?
Q6NUM9	All-trans-retinol 13,14-reductase	RETSAT	1.36279	1.27933	1.49911	1.06573	0.64131	1.05286	1.19797	1.47196	1.59893	1.77065	1.29646	1.05883	#NAME?	0.773137		0.248943	#NAME?	#NAME?		#NAME?	#NAME?
Q9NS00	Glycoprotein-N-acetylgalactosamine 3-beta-galactosyltransferase 1	C1GALT1	-1.68726	-2.0545	-2.67618	-3.24749	-1.68571	-1.49206	-1.66976	-1.59982	-1.94721	-2.10494	-1.3203	-2.08557	#NAME?	0.106955		0.352601	#NAME?	#NAME?		#NAME?	#NAME?
Q13362	Serine/threonine-protein phosphatase 2A 56 kDa regulatory subunit gamma isoform	PPP2R5C	-1.00598	0.115671	-0.802906	-0.945601	-2.66035	-1.44211	-1.94827	-0.427056	-0.532671	-0.560793	-1.19056	0.758507	#NAME?	0.97631		0.473404	#NAME?	#NAME?		#NAME?	#NAME?
Q9H0E3	Histone deacetylase complex subunit SAP130	SAP130	-1.52664	-1.61452	-1.6968	-1.52442	-1.51442	-2.3479	-1.50545	-1.01551	-1.3426	-1.33733	-1.56893	-1.8983	#NAME?	0.838191		0.259429	#NAME?	#NAME?		#NAME?	#NAME?
Q12872	Splicing factor, suppressor of white-apricot homolog	SFSWAP	-1.80358	-3.49262	-3.6399	-6.32333	-2.63295	-6.59421	-3.94893	-2.25607	-3.94665	-3.49637	-3.8118	-3.28225	#NAME?	0.0292828		0.624089	#NAME?	#NAME?		#NAME?	#NAME?
Q9NXK8	F-box/LRR-repeat protein 12	FBXL12	-0.275275	-1.1872	-0.513355	-0.569927	-1.21565	-2.60378	-1.60769	-1.17194	-1.22244	-0.21739	0.0806366	0.478559	#NAME?	0.981753		0.45082	#NAME?	#NAME?		#NAME?	#NAME?
Q15020	Squamous cell carcinoma antigen recognized by T-cells 3	SART3	2.04571	3.09774	2.83521	3.36591	1.62102	3.41968	5.82236	2.0276	1.31999	1.53674	5.76318	1.8828	#NAME?	0.0361239		0.327899	#NAME?	#NAME?		#NAME?	#NAME?
Q9UL15	BAG family molecular chaperone regulator 5	BAG5	-3.72328	-4.24666	-3.22246	-3.19185	-6.37887	-0.466539	-2.7802	-3.87031	-2.13176	-1.68507	-4.30611	-2.70718	#NAME?	0.183715		0.624836	#NAME?	#NAME?		#NAME?	#NAME?
Q5TEU4	Arginine-hydroxylase NDUFAF5, mitochondrial	NDUFAF5	-2.5004	-2.77222	-4.41461	-4.4859	-2.39174	-4.01033	-1.28538	-3.5906	-2.98443	-3.05686	-1.83471	-4.68498	#NAME?	0.642028		0.523038	#NAME?	#NAME?		#NAME?	#NAME?
Q9NUP1	Biogenesis of lysosome-related organelles complex 1 subunit 4	BLOC1S4	-3.83667	-6.401	-4.62493	-6.20609	-6.42854	-6.37913	-2.64441	-5.92236	-6.46456	-6.44257	-3.26592	-6.46079	#NAME?	0.348844		0.445962	#NAME?	#NAME?		#NAME?	#NAME?
Q13613	Myotubularin-related protein 1	MTMR1	-4.31572	-6.41311	-4.47018	-3.08403	-6.40958	-4.30377	-2.90909	-4.60176	-4.02527	-4.61247	-3.07079	-6.36401	#NAME?	0.922897		0.568834	#NAME?	#NAME?		#NAME?	#NAME?
Q96IV0	Peptide-N(4)-(N-acetyl-beta-glucosaminyl)asparagine amidase	NGLY1	-0.280077	-1.56495	-2.13429	-1.93491	-1.10393	-1.84121	-1.0119	-2.12376	-1.08856	-1.34348	-0.93337	0.0652103	#NAME?	0.950191		0.403917	#NAME?	#NAME?		#NAME?	#NAME?
Q02252	Methylmalonate-semialdehyde dehydrogenase [acylating], mitochondrial	ALDH6A1	2.90221	3.4383	3.5558	3.58375	3.86749	3.72519	3.32961	3.27161	4.24891	4.24887	3.97064	3.74506	#NAME?	0.58205		0.290324	#NAME?	#NAME?		#NAME?	#NAME?
P05026	Sodium/potassium-transporting ATPase subunit beta-1	ATP1B1	3.00311	3.92869	4.01009	3.65065	3.88871	3.43182	4.15198	3.11185	3.77491	4.09349	5.11858	3.76279	#NAME?	0.255508		0.350085	#NAME?	#NAME?		#NAME?	#NAME?
P17980	26S proteasome regulatory subunit 6A	PSMC3	3.18667	2.74519	3.07583	2.85724	2.90317	3.12989	3.36979	2.98077	2.94274	2.99522	3.86151	3.19238	#NAME?	0.146529		0.240734	#NAME?	#NAME?		#NAME?	#NAME?
P02768	Serum albumin	ALB	5.23531	4.9192	5.73441	5.8577	4.49953	6.83282	4.36447	4.42686	7.39418	7.25814	5.57133	7.30015	#NAME?	0.23622		0.539361	#NAME?	#NAME?		#NAME?	#NAME?
Q6UWV6	Ectonucleotide pyrophosphatase/phosphodiesterase family member 7	ENPP7	-1.82847	-2.70666	-3.04302	-3.18737	-2.2221	-2.97044	-1.14917	-1.7402	-3.03132	-1.56754	-0.0372711	-5.00288	#NAME?	0.0216969		0.571614	#NAME?	#NAME?		#NAME?	#NAME?
P51808	Dynein light chain Tctex-type 3	DYNLT3	-2.73494	-2.35852	-2.67069	-2.6582	-6.41767	-6.5152	-6.50769	-1.89954	-2.00109	-2.39565	-7.0443	-2.04337	#NAME?	0.675507		0.24393	#NAME?	#NAME?		#NAME?	#NAME?
Q99755	Phosphatidylinositol 4-phosphate 5-kinase type-1 alpha	PIP5K1A	-0.558377	-1.49466	-1.87711	-2.29224	0.569116	-2.6034	-1.30839	-0.542196	-0.744309	-0.965633	-1.36419	-0.539638	#NAME?	0.0216729		0.465386	#NAME?	#NAME?		#NAME?	#NAME?
Q5T0D9	Tumor protein p63-regulated gene 1-like protein	TPRG1L	-0.370009	-1.41445	-1.5407	-1.58619	-5.98814	-1.14037	-2.74759	-0.366798	-0.777705	-0.58504	-2.48192	-1.29057	#NAME?	0.160365		0.631706	#NAME?	#NAME?		#NAME?	#NAME?
Q92982	Ninjurin-1	NINJ1	1.14185	0.898117	1.03979	1.07105	0.509965	0.166076	0.568377	1.11105	1.2977	1.00935	1.15873	1.26898	#NAME?	0.438806		0.264555	#NAME?	#NAME?		#NAME?	#NAME?
Q9Y262	Eukaryotic translation initiation factor 3 subunit L	EIF3L	1.6327	1.36979	1.68509	1.47247	1.24729	1.34858	1.83834	1.56208	2.33541	2.53778	0.491178	2.11615	#NAME?	0.00616168		0.354171	#NAME?	#NAME?		#NAME?	#NAME?
Q9HBH5	Retinol dehydrogenase 14	RDH14	-0.290035	0.135451	-0.0272699	-0.287193	-0.174761	-0.342379	-0.227723	-0.532336	-0.404427	-0.348619	0.352517	2.40561	#NAME?	0.00121713		0.371868	#NAME?	#NAME?		#NAME?	#NAME?
Q92621	Nuclear pore complex protein Nup205	NUP205	3.51351	1.17193	0.112846	0.684726	0.839843	1.21021	-0.222973	2.98684	2.37551	2.6125	0.487805	2.61813	#NAME?	0.789786		0.554122	#NAME?	#NAME?		#NAME?	#NAME?
Q9UPN7	Serine/threonine-protein phosphatase 6 regulatory subunit 1	PPP6R1	0.156529	0.0201307	-0.645797	-0.9461	-2.25626	-1.16167	-1.4548	-0.459592	2.49853	-0.398899	-1.51578	-0.255775	#NAME?	0.291472		0.541141	#NAME?	#NAME?		#NAME?	#NAME?
Q93074	Mediator of RNA polymerase II transcription subunit 12	MED12	-6.18791	-6.26138	-2.66624	-6.42896	-6.38745	-4.32126	-3.4637	-2.30964	-6.47782	-2.51422	-7.00488	-6.36331	#NAME?	0.486742		0.686603	#NAME?	#NAME?		#NAME?	#NAME?
P03915	NADH-ubiquinone oxidoreductase chain 5	MT-ND5	1.07226	-0.0678236	-0.132424	0.858397	1.31895	-0.0102344	0.533232	0.236361	1.15897	0.458868	1.41161	1.41194	#NAME?	0.638844		0.361975	#NAME?	#NAME?		#NAME?	#NAME?
Q9UJX3	Anaphase-promoting complex subunit 7	ANAPC7	-1.40582	-1.25755	-0.9018	-1.54659	-0.256445	-0.377341	-0.496566	-1.01049	0.414329	0.181126	-2.02314	-0.363336	#NAME?	0.309633		0.407912	#NAME?	#NAME?		#NAME?	#NAME?
Q9H4K7	Mitochondrial ribosome-associated GTPase 2	MTG2	-5.01098	-6.42113	-6.30611	0.908196	-6.3851	-6.56198	-1.28054	-5.91021	-6.35541	-4.32878	-0.452906	-6.36573	#NAME?	0.822371		0.847255	#NAME?	#NAME?		#NAME?	#NAME?
Q6P2E9	Enhancer of mRNA-decapping protein 4	EDC4	0.126479	-1.07577	-0.256608	-0.660988	1.0444	-0.858357	0.861673	0.204957	-0.443096	-0.827171	1.15163	-0.119247	#NAME?	0.959412		0.418264	#NAME?	#NAME?		#NAME?	#NAME?
Q9BQE5	Apolipoprotein L2	APOL2	-0.0811358	-0.761462	-0.244072	-0.428	0.439912	-3.08605	0.292516	-0.746708	-0.682023	-0.667652	2.33807	-1.08457	#NAME?	0.947893		0.60174	#NAME?	#NAME?		#NAME?	#NAME?
O60271	C-Jun-amino-terminal kinase-interacting protein 4	SPAG9	-0.0117573	-0.199146	0.390329	-1.38154	0.390959	-2.99588	1.57681	-0.419099	-1.35183	-1.19975	1.527	-0.564743	#NAME?	0.974101		0.56257	#NAME?	#NAME?		#NAME?	#NAME?
Q9Y2G8	DnaJ homolog subfamily C member 16	DNAJC16	-1.34935	-2.51655	-2.01056	-2.15228	-2.18406	-1.91675	-0.313662	-2.3005	-2.38142	-1.31497	-1.54564	-2.05896	#NAME?	0.151785		0.369067	#NAME?	#NAME?		#NAME?	#NAME?
Q9BQE3	Tubulin alpha-1C chain	TUBA1C	7.18774	7.46099	8.03167	7.5718	8.22341	7.76127	7.97758	7.2616	8.04668	7.74758	9.15968	8.04872	#NAME?	0.300667		0.334159	#NAME?	#NAME?		#NAME?	#NAME?
Q5VW38	Protein GPR107	GPR107	-1.44695	-1.63381	-2.09572	-1.66531	-2.11445	-2.69694	-1.8209	-1.58723	-1.105	-0.887273	-1.86432	-2.40836	#NAME?	0.684965		0.330013	#NAME?	#NAME?		#NAME?	#NAME?
Q96SZ5	2-aminoethanethiol dioxygenase	ADO	-2.84571	-3.48083	-2.70296	-1.37032	-3.70392	-2.10213	-1.9664	-3.36428	-3.94053	-2.56121	0.515783	-1.6028	#NAME?	0.220034		0.547739	#NAME?	#NAME?		#NAME?	#NAME?
Q7L5Y9	E3 ubiquitin-protein transferase MAEA	MAEA	-2.36277	-3.37329	-5.58789	-4.20603	-5.87322	-5.89609	-3.47715	-2.54969	-2.88863	-6.25718	-4.58312	-4.05839	#NAME?	0.840684		0.580857	#NAME?	#NAME?		#NAME?	#NAME?
Q9HBH1	Peptide deformylase, mitochondrial	PDF	0.161306	0.271024	0.82884	0.357518	-0.957116	0.981574	0.975583	0.326789	0.705967	0.472942	0.648476	0.533474	#NAME?	0.027963		0.336681	#NAME?	#NAME?		#NAME?	#NAME?
Q15005	Signal peptidase complex subunit 2	SPCS2	2.75979	2.56659	2.91984	2.4741	2.9521	2.50202	2.55712	2.70657	2.88775	2.70251	3.57315	3.2531	#NAME?	0.205655		0.250962	#NAME?	#NAME?		#NAME?	#NAME?
P56556	NADH dehydrogenase [ubiquinone] 1 alpha subcomplex subunit 6	NDUFA6	1.71399	1.85485	2.01092	2.1325	1.85151	1.67254	1.72709	1.74957	2.56418	2.12097	2.00845	2.47696	#NAME?	0.146725		0.235149	#NAME?	#NAME?		#NAME?	#NAME?
Q6UWM9	UDP-glucuronosyltransferase 2A3	UGT2A3	-0.500198	-0.000502158	0.145791	-0.210098	-0.327006	-0.182174	3.26766	-0.7062	-0.465095	-0.857991	-0.685057	-0.871749	#NAME?	0.000555004		0.12596	#NAME?	#NAME?		#NAME?	#NAME?
P04424	Argininosuccinate lyase	ASL	-0.220602	0.29856	0.35372	0.506448	0.458666	0.311438	-0.264008	0.311991	0.691423	0.432928	1.48664	0.895715	#NAME?	0.097839		0.307744	#NAME?	#NAME?		#NAME?	#NAME?
Q9Y251	Heparanase	HPSE	2.67107	2.67066	2.89793	3.36998	3.16885	3.21026	3.23724	3.1477	3.12009	2.93601	3.94314	3.14994	#NAME?	0.71451		0.257566	#NAME?	#NAME?		#NAME?	#NAME?
O43913	Origin recognition complex subunit 5	ORC5	-3.08809	-2.81956	-6.46941	-3.62606	-1.74142	-2.19411	-2.45463	-3.52735	-2.51475	-2.66925	-2.32141	-3.20756	#NAME?	0.0153753		0.540618	#NAME?	#NAME?		#NAME?	#NAME?
Q9HA82	Ceramide synthase 4	CERS4	-1.31197	-1.26137	-1.45631	-3.37872	-3.18632	-2.22619	-1.5325	-1.5433	-2.06475	-1.86738	-1.70548	-1.74394	#NAME?	0.00395836		0.393923	#NAME?	#NAME?		#NAME?	#NAME?
Q8N5V2	Ephexin-1	NGEF	-5.48541	-5.96273	-5.01057	-4.43882	-3.73532	-5.10015	-2.92408	-4.29815	-6.25051	-5.00813	-5.99976	-1.93407	#NAME?	0.112155		0.553049	#NAME?	#NAME?		#NAME?	#NAME?
Q99519	Sialidase-1	NEU1	0.8414	0.818011	0.797737	0.572333	0.896231	0.736358	1.95121	2.20275	0.930274	0.994365	-0.151355	0.932267	#NAME?	0.000441057		0.366241	#NAME?	#NAME?		#NAME?	#NAME?
P19971	Thymidine phosphorylase	TYMP	0.0956001	-1.04503	-0.855119	-1.26181	-1.4366	-1.84781	-2.23948	0.950231	0.278488	0.43085	-2.31584	-0.481163	#NAME?	0.122951		0.495643	#NAME?	#NAME?		#NAME?	#NAME?
P12270	Nucleoprotein TPR	TPR	0.957235	0.857267	0.870545	1.2835	1.66692	1.35877	2.36631	1.21439	1.11464	0.887987	2.94932	0.763566	#NAME?	0.0446921		0.383663	#NAME?	#NAME?		#NAME?	#NAME?
P55157	Microsomal triglyceride transfer protein large subunit	MTTP	4.85579	3.53867	3.52255	3.46267	5.35973	3.55225	3.50919	4.73457	4.42012	4.59707	4.43304	4.88294	#NAME?	0.256064		0.380878	#NAME?	#NAME?		#NAME?	#NAME?
Q9H3G5	Probable serine carboxypeptidase CPVL	CPVL	0.74671	1.27328	2.10038	1.69189	0.957274	1.6905	2.84216	0.977625	1.09685	1.56439	2.88105	1.1303	#NAME?	0.251209		0.338723	#NAME?	#NAME?		#NAME?	#NAME?
Q9Y2Q9	28S ribosomal protein S28, mitochondrial	MRPS28	0.323438	0.606717	0.782174	0.828404	1.30224	0.64277	1.12546	0.276049	0.957765	1.13853	1.42649	1.15464	#NAME?	0.690621		0.265533	#NAME?	#NAME?		#NAME?	#NAME?
P19387	DNA-directed RNA polymerase II subunit RPB3	POLR2C	-2.54473	-2.77813	-1.69893	-2.57637	-1.96029	-2.60223	-1.76826	-2.08429	-2.14712	-2.45947	-2.43419	-1.6065	#NAME?	0.651745		0.27681	#NAME?	#NAME?		#NAME?	#NAME?
Q9Y446	Plakophilin-3	PKP3	0.492453	-0.0560165	0.0746649	-0.0689161	0.44685	-0.0908269	0.842789	0.0172333	-0.110483	0.228484	1.49291	0.177988	#NAME?	0.0939475		0.308452	#NAME?	#NAME?		#NAME?	#NAME?
Q5RI15	Cytochrome c oxidase assembly protein COX20, mitochondrial	COX20	1.39496	0.915685	0.948111	0.892974	-0.289732	0.987792	0.841613	0.834033	1.36861	1.51517	1.3084	0.810081	#NAME?	0.229164		0.304687	#NAME?	#NAME?		#NAME?	#NAME?
Q99707	Methionine synthase	MTR	-6.24174	-5.64895	-6.5208	-6.22432	-6.62221	-6.37142	-3.98454	-5.53343	-6.77736	-6.32235	-6.8089	-5.70283	#NAME?	0.0269566		0.416672	#NAME?	#NAME?		#NAME?	#NAME?
Q7L3T8	Probable proline--tRNA ligase, mitochondrial	PARS2	-1.93829	-2.20067	-2.58262	-3.00817	-2.93596	-3.22309	-2.58162	-1.94872	-1.74917	-2.05906	-2.61237	-3.04121	#NAME?	0.967909		0.316106	#NAME?	#NAME?		#NAME?	#NAME?
Q96GD0	Pyridoxal phosphate phosphatase	PDXP	-0.787555	0.109638	-0.432987	-0.361822	-0.889905	-0.774036	4.77299	-0.984775	-0.407634	-1.20062	5.36067	-5.57917	#NAME?	6.61874e-05		0.849689	#NAME?	#NAME?		#NAME?	#NAME?
P12268	Inosine-5'-monophosphate dehydrogenase 2	IMPDH2	3.51771	3.75693	3.63276	3.59618	3.723	3.15332	4.51913	3.71364	3.64939	3.49441	4.96204	3.03846	#NAME?	0.0219063		0.332862	#NAME?	#NAME?		#NAME?	#NAME?
Q92963	GTP-binding protein Rit1	RIT1	-1.16587	-0.186256	-0.0486772	-0.287901	-1.01437	-0.559742	0.481058	-1.41212	-0.49863	-0.459416	0.522118	0.25246	#NAME?	0.301778		0.358048	#NAME?	#NAME?		#NAME?	#NAME?
Q9BXR6	Complement factor H-related protein 5	CFHR5	-2.52495	-3.15456	-3.40975	-4.17852	-6.55243	-6.58053	-2.7808	-2.65709	-3.02199	-3.90941	-3.88151	-6.52282	#NAME?	0.671647		0.604519	#NAME?	#NAME?		#NAME?	#NAME?
P78310	Coxsackievirus and adenovirus receptor	CXADR	1.03337	1.37919	1.21305	1.18928	0.271644	1.03542	1.69989	0.657397	1.09	0.990352	2.24611	1.3097	#NAME?	0.428939		0.311916	#NAME?	#NAME?		#NAME?	#NAME?
Q10570	Cleavage and polyadenylation specificity factor subunit 1	CPSF1	0.758352	0.347793	0.354364	0.136675	0.804664	0.603917	-0.317631	1.71491	1.41093	1.34979	-0.167414	1.25275	#NAME?	0.0192433		0.372927	#NAME?	#NAME?		#NAME?	#NAME?
Q8WV19	Vesicle transport protein SFT2A	SFT2D1	-2.20217	-2.67595	-3.77668	-4.53674	-6.24088	-3.97941	-4.26194	-3.74246	-0.700571	-3.62267	-5.22695	-2.35928	#NAME?	0.830787		0.582991	#NAME?	#NAME?		#NAME?	#NAME?
P12956	X-ray repair cross-complementing protein 6	XRCC6	4.9736	5.36831	5.22626	5.37155	5.58778	5.40653	5.53597	5.06089	5.51639	5.40494	6.12014	5.68146	#NAME?	0.277229		0.230964	#NAME?	#NAME?		#NAME?	#NAME?
Q86V21	Acetoacetyl-CoA synthetase	AACS	-0.531168	1.18375	0.819584	1.03587	-0.733373	1.12378	3.82089	1.11781	-1.2976	-0.133217	3.34191	-0.352276	#NAME?	0.0791198		0.599847	#NAME?	#NAME?		#NAME?	#NAME?
Q03154	Aminoacylase-1	ACY1	2.76726	2.74924	3.16422	2.88025	3.16255	2.90922	2.88137	2.99313	3.09795	3.04746	3.08197	3.64988	#NAME?	0.430258		0.186503	#NAME?	#NAME?		#NAME?	#NAME?
P22413	Ectonucleotide pyrophosphatase/phosphodiesterase family member 1	ENPP1	1.17998	1.12281	1.08488	1.23736	0.705495	1.17878	1.53292	1.27531	0.607954	0.559938	2.06413	2.56281	#NAME?	0.00753479		0.348959	#NAME?	#NAME?		#NAME?	#NAME?
P55263	Adenosine kinase	ADK	3.97208	3.95063	2.56805	3.92657	2.21539	3.96058	4.43015	4.11573	3.75694	3.50342	3.71606	3.25171	#NAME?	0.177091		0.363453	#NAME?	#NAME?		#NAME?	#NAME?
O95168	NADH dehydrogenase [ubiquinone] 1 beta subcomplex subunit 4	NDUFB4	1.94733	2.60698	0.648931	2.04091	1.60568	1.02007	2.43998	1.75522	1.98703	1.66936	2.17958	1.81727	#NAME?	0.0708437		0.329755	#NAME?	#NAME?		#NAME?	#NAME?
O43674	NADH dehydrogenase [ubiquinone] 1 beta subcomplex subunit 5, mitochondrial	NDUFB5	1.11608	1.37831	1.44038	1.36455	1.33862	1.4132	1.66801	0.880393	1.70131	1.36085	1.78115	2.15888	#NAME?	0.0119324		0.249906	#NAME?	#NAME?		#NAME?	#NAME?
Q6UWZ7	BRCA1-A complex subunit Abraxas 1	ABRAXAS1	-6.29232	-6.18421	-6.34897	-3.65326	-6.36543	-4.19673	-3.07425	-6.01371	-6.26748	-6.24559	-3.29119	-6.47535	#NAME?	0.595065		0.278891	#NAME?	#NAME?		#NAME?	#NAME?
Q13428	Treacle protein	TCOF1	2.71973	2.10076	1.67729	2.0864	2.68412	1.55323	1.67495	2.89005	3.1804	3.33757	1.26017	2.73057	#NAME?	0.252931		0.375362	#NAME?	#NAME?		#NAME?	#NAME?
Q8TB36	Ganglioside-induced differentiation-associated protein 1	GDAP1	0.737263	-0.417968	-3.57285	-1.42854	-2.227	-1.93102	-2.16796	-0.614957	-0.722994	-0.886583	-1.09867	-0.369855	#NAME?	0.0824263		0.496515	#NAME?	#NAME?		#NAME?	#NAME?
P04114	Apolipoprotein B-100	APOB	3.65836	3.45928	3.45396	3.23936	0.541819	3.36751	2.50138	4.2398	3.74487	3.54655	2.25615	4.23992	#NAME?	0.487852		0.468063	#NAME?	#NAME?		#NAME?	#NAME?
O43324	Eukaryotic translation elongation factor 1 epsilon-1	EEF1E1	2.53163	1.61012	2.0244	1.17712	1.40309	0.932168	1.93492	2.28235	1.99654	0.873358	1.94532	2.30481	#NAME?	0.816982		0.276464	#NAME?	#NAME?		#NAME?	#NAME?
Q6P6B7	Ankyrin repeat domain-containing protein 16	ANKRD16	-2.76449	-3.16689	-2.4931	-2.73219	-3.41342	-3.9983	-2.68825	-2.49979	-1.88684	-2.81744	-3.73093	-2.9145	#NAME?	0.858099		0.33844	#NAME?	#NAME?		#NAME?	#NAME?
P07910	Heterogeneous nuclear ribonucleoproteins C1/C2	HNRNPC	6.2076	6.4923	6.4788	6.43351	6.54486	5.95846	6.78585	6.15841	6.58105	6.36087	7.32697	6.39613	#NAME?	0.209872		0.24896	#NAME?	#NAME?		#NAME?	#NAME?
Q9BX95	Sphingosine-1-phosphate phosphatase 1	SGPP1	-0.287979	-3.52244	-6.33761	-2.96331	-6.34873	-3.17182	-2.1228	-5.95327	-1.52801	-6.22322	-0.251699	-2.13697	#NAME?	0.883641		0.735989	#NAME?	#NAME?		#NAME?	#NAME?
P13284	Gamma-interferon-inducible lysosomal thiol reductase	IFI30	-0.373211	-0.443106	-0.60969	-0.469569	-0.660383	-1.62204	0.53215	0.451613	0.144007	-0.408255	-1.07592	-1.58169	#NAME?	0.203812		0.373319	#NAME?	#NAME?		#NAME?	#NAME?
Q16881	Thioredoxin reductase 1, cytoplasmic	TXNRD1	2.84534	2.40498	2.23273	2.67975	1.30236	2.45075	2.44915	2.23224	2.79052	2.47804	2.78207	2.88576	#NAME?	0.12201		0.283644	#NAME?	#NAME?		#NAME?	#NAME?
P01130	Low-density lipoprotein receptor	LDLR	1.1271	1.50591	0.339972	1.49882	0.480614	1.18721	0.0701574	1.41368	1.22307	1.14057	3.10613	1.57368	#NAME?	0.167658		0.397942	#NAME?	#NAME?		#NAME?	#NAME?
Q9H2P9	Diphthine methyl ester synthase	DPH5	-1.51086	-4.56725	-3.89687	-3.79677	-4.36824	-6.07468	-4.83779	-2.04638	-1.79809	-3.20157	-6.1847	-2.5989	#NAME?	0.747955		0.591208	#NAME?	#NAME?		#NAME?	#NAME?
Q96CB9	5-methylcytosine rRNA methyltransferase NSUN4	NSUN4	0.881446	0.13481	0.0494095	-0.499457	0.23754	-1.01021	0.0556505	-0.0912034	0.29407	0.41248	-0.0251625	1.12584	#NAME?	0.437815		0.32969	#NAME?	#NAME?		#NAME?	#NAME?
Q9Y2X3	Nucleolar protein 58	NOP58	3.76397	4.06343	4.03535	4.16663	3.94723	4.07271	4.04628	3.72694	4.27198	3.99409	5.12159	4.46876	#NAME?	0.0155082		0.263387	#NAME?	#NAME?		#NAME?	#NAME?
Q9H000	Probable E3 ubiquitin-protein ligase makorin-2	MKRN2	-2.66462	-1.89908	-2.72545	-2.0854	-1.81628	-2.0106	0.326422	-2.33598	-2.00791	-1.64202	-0.131131	-4.32801	#NAME?	0.00656483		0.513801	#NAME?	#NAME?		#NAME?	#NAME?
Q9UHQ1	Nuclear prelamin A recognition factor	NARF	-1.55775	-2.22727	-3.06553	-3.22031	-3.55118	-3.15244	-2.86326	-2.23699	-1.29668	-2.04836	-3.26174	-2.7865	#NAME?	0.892791		0.380159	#NAME?	#NAME?		#NAME?	#NAME?
Q15366	Poly(rC)-binding protein 2	PCBP2	4.4242	4.49396	4.37059	4.54065	3.19433	4.20153	4.66761	4.25812	4.1604	4.60167	5.08004	4.18374	#NAME?	0.466773		0.287719	#NAME?	#NAME?		#NAME?	#NAME?
O75052	Carboxyl-terminal PDZ ligand of neuronal nitric oxide synthase protein	NOS1AP	-1.92096	-2.2796	-2.8242	-2.5845	-2.47555	-2.80115	-2.31733	-1.91008	-2.69247	-2.42055	-1.96556	-2.13818	#NAME?	0.75795		0.2403	#NAME?	#NAME?		#NAME?	#NAME?
Q0VDI3	Transmembrane protein 267	TMEM267	-6.06157	-3.43217	-6.49188	-4.04642	-2.66267	-6.51597	-6.61779	-2.4147	-6.34885	-1.74367	-6.7791	-1.08511	#NAME?	0.33613		0.703577	#NAME?	#NAME?		#NAME?	#NAME?
P24855	Deoxyribonuclease-1	DNASE1	0.522242	0.615455	0.141454	0.538995	1.15115	0.0461236	1.61896	1.26197	0.538958	0.402596	0.667198	0.297856	#NAME?	0.540963		0.295354	#NAME?	#NAME?		#NAME?	#NAME?
P14314	Glucosidase 2 subunit beta	PRKCSH	3.86252	3.80982	4.27629	3.71898	4.28366	3.89983	4.04505	3.91211	4.28905	4.37261	4.79983	3.83448	#NAME?	0.421982		0.233672	#NAME?	#NAME?		#NAME?	#NAME?
Q7Z406	Myosin-14	MYH14	0.873606	0.862843	0.431801	0.832963	0.436219	0.79665	0.59769	0.985497	0.380079	1.12437	1.75297	0.947491	#NAME?	0.102097		0.259002	#NAME?	#NAME?		#NAME?	#NAME?
Q9NQT5	Exosome complex component RRP40	EXOSC3	1.7466	1.4727	0.500092	2.21291	2.22802	1.1083	0.761024	1.71074	2.60264	2.36934	1.42137	2.65083	#NAME?	0.801931		0.374552	#NAME?	#NAME?		#NAME?	#NAME?
Q9HB07	UPF0160 protein MYG1, mitochondrial	C12orf10	2.26826	1.75535	2.39016	1.63708	2.71725	1.72131	2.26888	2.28876	2.07199	2.20204	2.62187	2.52947	#NAME?	0.122527		0.248934	#NAME?	#NAME?		#NAME?	#NAME?
Q9Y250	Leucine zipper putative tumor suppressor 1	LZTS1	-0.821561	-1.36924	-2.00827	-2.02269	-1.2558	-3.36021	0.83919	-0.896662	-1.84702	-1.75804	-1.16217	-3.13176	#NAME?	0.414406		0.480219	#NAME?	#NAME?		#NAME?	#NAME?
Q9UHG3	Prenylcysteine oxidase 1	PCYOX1	2.19222	2.06255	1.86905	2.27812	2.53562	2.44619	2.4189	2.52561	2.15022	2.1826	2.77099	2.55889	#NAME?	0.939822		0.203911	#NAME?	#NAME?		#NAME?	#NAME?
Q7LBC6	Lysine-specific demethylase 3B	KDM3B	-0.504697	0.516641	0.221346	0.16921	-1.60772	-0.101187	2.90509	-0.51916	-1.11516	-1.13946	2.02293	-1.30373	#NAME?	0.0759169		0.359487	#NAME?	#NAME?		#NAME?	#NAME?
P30520	Adenylosuccinate synthetase isozyme 2	ADSS	2.51698	1.63014	1.74713	3.09229	3.13086	3.544	0.0529809	2.65803	3.43127	3.90387	4.3984	4.29742	#NAME?	0.134084		0.513428	#NAME?	#NAME?		#NAME?	#NAME?
P09668	Pro-cathepsin H	CTSH	1.46087	1.29951	1.77936	2.17371	1.83031	1.89133	1.37296	1.8478	1.84219	1.52034	3.25727	2.51759	#NAME?	0.0991966		0.320512	#NAME?	#NAME?		#NAME?	#NAME?
Q13123	Protein Red	IK	0.760228	0.437961	0.582133	0.627253	0.808308	0.623687	0.339403	0.866673	1.28002	1.13958	0.515514	1.04121	#NAME?	0.042248		0.223805	#NAME?	#NAME?		#NAME?	#NAME?
Q8IUW5	RELT-like protein 1	RELL1	-1.27941	-0.850494	-1.45617	-0.949211	-0.927522	-1.7089	-1.61226	-0.532231	-0.885597	-0.80758	-0.938847	-0.899707	#NAME?	0.931		0.249247	#NAME?	#NAME?		#NAME?	#NAME?
O75190	DnaJ homolog subfamily B member 6	DNAJB6	-6.1344	0.00901229	-0.98957	-0.633177	-0.909569	-0.670445	-2.62818	-2.69038	4.34683	4.18884	-6.81809	-0.489724	#NAME?	0.180279		0.872906	#NAME?	#NAME?		#NAME?	#NAME?
Q8IXJ6	NAD-dependent protein deacetylase sirtuin-2	SIRT2	-0.72913	-0.63483	-6.35102	-0.655368	-0.358237	-6.3995	-2.16793	-0.585064	-1.10671	-0.575852	-6.86228	-1.72676	#NAME?	0.631768		0.350583	#NAME?	#NAME?		#NAME?	#NAME?
Q6IPR3	tRNA wybutosine-synthesizing protein 3 homolog	TYW3	-2.2872	-1.816	-2.57089	-2.97547	-4.15993	-6.53374	-2.05176	-1.91115	-1.9721	-3.0474	-7.01324	-2.55799	#NAME?	0.78555		0.298266	#NAME?	#NAME?		#NAME?	#NAME?
Q9BSH5	Haloacid dehalogenase-like hydrolase domain-containing protein 3	HDHD3	2.44846	1.98908	2.287	2.0928	2.65137	1.87072	2.34459	2.54392	2.39134	2.55615	2.43328	2.22884	#NAME?	0.0807761		0.193115	#NAME?	#NAME?		#NAME?	#NAME?
Q8N3R9	MAGUK p55 subfamily member 5	MPP5	-1.24998	-6.26463	-4.2448	-6.31532	-2.74432	-4.41413	-1.19252	-1.505	-6.36357	-6.21407	-0.931423	-6.54957	#NAME?	0.448635		0.412838	#NAME?	#NAME?		#NAME?	#NAME?
Q14353	Guanidinoacetate N-methyltransferase	GAMT	2.06853	1.89418	1.02031	1.7118	0.848303	1.21549	2.10696	1.64445	1.43836	1.39347	2.82052	1.25565	#NAME?	0.721135		0.316797	#NAME?	#NAME?		#NAME?	#NAME?
Q8WU76	Sec1 family domain-containing protein 2	SCFD2	-1.49101	-2.15747	-1.12805	-2.66549	-3.89152	-2.7058	0.606082	-2.19154	-3.13712	-4.06325	1.49433	-3.15519	#NAME?	0.0931152		0.598774	#NAME?	#NAME?		#NAME?	#NAME?
Q03167	Transforming growth factor beta receptor type 3	TGFBR3	-0.162546	0.146632	0.169497	-0.0243798	-0.165944	-0.0305413	-1.2213	1.19167	1.3877	1.59306	-2.02906	1.9851	#NAME?	5.12667e-05		0.495742	#NAME?	#NAME?		#NAME?	#NAME?
Q9NV35	Nucleotide triphosphate diphosphatase NUDT15	NUDT15	-6.15306	-4.37509	-6.48866	-4.29168	-4.88244	-6.66083	-4.14751	-5.95029	-4.24667	-4.5738	-4.80639	-6.44931	#NAME?	0.781948		0.446296	#NAME?	#NAME?		#NAME?	#NAME?
O00268	Transcription initiation factor TFIID subunit 4	TAF4	-2.91238	-4.51834	-2.19216	-4.25744	-3.29564	-4.02273	-2.3091	-2.30674	-4.95315	-4.55564	-2.45538	-2.53512	#NAME?	0.502891		0.34726	#NAME?	#NAME?		#NAME?	#NAME?
Q96KC8	DnaJ homolog subfamily C member 1	DNAJC1	-1.56725	-1.60363	-2.09293	-2.84233	-2.32309	-1.60154	-2.13917	-1.41033	-1.48188	-1.35072	-3.07431	-1.56935	#NAME?	0.579254		0.167499	#NAME?	#NAME?		#NAME?	#NAME?
Q9Y6G3	39S ribosomal protein L42, mitochondrial	MRPL42	-2.08201	-2.59676	-3.20914	-2.48923	-3.24688	-6.39147	-1.25156	-1.90323	-4.28633	-4.89058	-0.631305	-3.57183	#NAME?	0.822111		0.580109	#NAME?	#NAME?		#NAME?	#NAME?
Q14643	Inositol 1,4,5-trisphosphate receptor type 1	ITPR1	-1.27743	-1.89979	-1.59619	-1.59969	-1.85755	-1.5158	-0.200518	-3.26697	-0.683554	-0.755194	-0.322784	-2.03249	#NAME?	0.00245722		0.414159	#NAME?	#NAME?		#NAME?	#NAME?
O14880	Microsomal glutathione S-transferase 3	MGST3	0.360317	0.286423	-0.19176	0.221724	-0.76814	-0.0593574	0.570347	0.754642	-0.739682	-0.00771053	0.751674	0.326856	#NAME?	0.50993		0.301153	#NAME?	#NAME?		#NAME?	#NAME?
P22090	40S ribosomal protein S4, Y isoform 1	RPS4Y1	2.84884	2.75644	2.51571	2.57817	2.22774	2.48428	3.20637	2.09006	2.54101	2.67956	3.7292	2.81544	#NAME?	0.057456		0.275076	#NAME?	#NAME?		#NAME?	#NAME?
Q9NSE4	Isoleucine--tRNA ligase, mitochondrial	IARS2	2.15221	2.93735	2.89335	2.87282	1.86151	2.76328	3.11729	2.15793	2.71327	2.5274	3.85488	2.95059	#NAME?	0.612517		0.306806	#NAME?	#NAME?		#NAME?	#NAME?
Q969H8	Myeloid-derived growth factor	MYDGF	3.55944	3.80495	3.75584	3.71431	3.52132	3.05205	4.4225	3.4671	3.76231	3.67088	4.38079	3.26139	#NAME?	0.254833		0.259507	#NAME?	#NAME?		#NAME?	#NAME?
Q9UKM9	RNA-binding protein Raly	RALY	4.0702	4.22746	4.39214	4.25736	4.48509	4.03158	4.26818	4.06534	4.3453	4.80377	4.59204	4.52625	#NAME?	0.409525		0.189507	#NAME?	#NAME?		#NAME?	#NAME?
P29692	Elongation factor 1-delta	EEF1D	4.04446	3.37054	3.67502	3.2008	4.02218	3.11266	4.07128	3.97866	3.67833	3.63973	3.77969	3.65562	#NAME?	0.104422		0.229609	#NAME?	#NAME?		#NAME?	#NAME?
Q32P41	tRNA (guanine(37)-N1)-methyltransferase	TRMT5	-1.39379	-2.00981	-3.11542	-1.01495	-2.90905	-2.87609	-2.59773	-1.10776	-1.3535	-1.35612	-2.84724	-1.73368	#NAME?	0.67195		0.387178	#NAME?	#NAME?		#NAME?	#NAME?
Q9H7Z7	Prostaglandin E synthase 2	PTGES2	0.963524	0.959597	0.965557	0.623128	1.1657	0.374722	1.00868	0.484148	0.943523	1.06222	1.54017	1.44264	#NAME?	0.55765		0.238191	#NAME?	#NAME?		#NAME?	#NAME?
Q969G3	SWI/SNF-related matrix-associated actin-dependent regulator of chromatin subfamily E member 1	SMARCE1	0.904748	1.3524	0.916904	1.37883	1.56104	1.36531	2.69858	0.26821	1.58646	1.23092	2.78252	1.12098	#NAME?	0.0138935		0.368076	#NAME?	#NAME?		#NAME?	#NAME?
P16150	Leukosialin	SPN	-0.676951	-0.914039	-1.14858	-1.34744	-1.45865	-1.68691	0.103173	0.782144	-0.231666	-0.410368	-0.729569	-3.85729	#NAME?	0.00562618		0.481498	#NAME?	#NAME?		#NAME?	#NAME?
Q13480	GRB2-associated-binding protein 1	GAB1	-6.18739	-3.30067	-6.3177	-6.24182	-2.85367	-6.43918	-6.55521	-5.96896	-6.37099	-6.44109	-1.02034	-2.6185	#NAME?	0.448681		0.394226	#NAME?	#NAME?		#NAME?	#NAME?
Q9Y3C4	EKC/KEOPS complex subunit TPRKB	TPRKB	-2.71194	-1.86472	-3.48895	-2.65211	-3.1122	-5.25634	-0.468766	-2.13219	-6.26654	-2.57942	-3.16358	-1.06041	#NAME?	0.233988		0.569228	#NAME?	#NAME?		#NAME?	#NAME?
P26373	60S ribosomal protein L13	RPL13	5.18446	4.30532	4.94383	4.85718	5.08398	4.82465	5.14873	5.01834	5.07216	4.86304	5.55211	4.83331	#NAME?	0.727687		0.214711	#NAME?	#NAME?		#NAME?	#NAME?
Q9UJC3	Protein Hook homolog 1	HOOK1	-1.53351	-1.51052	-1.24181	-1.917	-6.4684	-3.62346	-1.69404	-0.916031	-1.22924	-2.84647	-4.33221	-1.83376	#NAME?	0.318652		0.573824	#NAME?	#NAME?		#NAME?	#NAME?
P14406	Cytochrome c oxidase subunit 7A2, mitochondrial	COX7A2	1.87565	2.1766	2.09905	2.03578	2.06474	2.27743	2.95332	1.63942	2.8298	2.03527	2.75068	1.92029	#NAME?	0.00771244		0.266591	#NAME?	#NAME?		#NAME?	#NAME?
Q9HBL7	Plasminogen receptor (KT)	PLGRKT	-2.48219	-2.33994	0.609303	-2.07562	-4.3893	-1.70733	-2.13695	-0.969692	-0.970978	-0.707162	-2.91989	-1.72382	#NAME?	0.189583		0.492764	#NAME?	#NAME?		#NAME?	#NAME?
P21953	2-oxoisovalerate dehydrogenase subunit beta, mitochondrial	BCKDHB	0.503144	-0.225886	0.29	-0.137148	0.0241168	0.29594	-0.108317	0.895802	-0.338941	0.618198	0.452973	0.794642	#NAME?	0.236524		0.260698	#NAME?	#NAME?		#NAME?	#NAME?
P22570	NADPH:adrenodoxin oxidoreductase, mitochondrial	FDXR	2.2275	2.14441	2.74002	2.82432	2.06495	2.49054	2.84003	2.23975	2.48543	2.95485	2.8438	2.4461	#NAME?	0.80113		0.219705	#NAME?	#NAME?		#NAME?	#NAME?
O00148	ATP-dependent RNA helicase DDX39A	DDX39A	2.10353	1.92358	1.65413	2.10345	1.23237	1.91622	1.84772	1.93883	2.2125	2.29215	2.23318	1.69877	#NAME?	0.504739		0.214978	#NAME?	#NAME?		#NAME?	#NAME?
Q13131	5'-AMP-activated protein kinase catalytic subunit alpha-1	PRKAA1	0.335421	1.18557	0.943605	0.410041	1.17565	0.938092	1.86327	0.777931	0.861124	0.828055	1.91663	0.666049	#NAME?	0.359753		0.32078	#NAME?	#NAME?		#NAME?	#NAME?
P26927	Hepatocyte growth factor-like protein	MST1	-3.99458	-3.03284	-3.38669	-3.71286	-3.51696	-1.96891	-2.7164	-2.67027	-3.8788	-2.53613	-2.43298	-3.37208	#NAME?	0.627982		0.334363	#NAME?	#NAME?		#NAME?	#NAME?
P49005	DNA polymerase delta subunit 2	POLD2	-1.4611	-1.59395	-3.33599	-4.03498	-1.90985	-2.73484	0.0348449	-1.51273	-2.29115	-2.03812	-1.57476	-4.71873	#NAME?	0.39522		0.495011	#NAME?	#NAME?		#NAME?	#NAME?
Q9UHG2	ProSAAS	PCSK1N	-1.1873	-6.1695	-1.43153	-6.36862	-6.34865	-6.65636	-6.34352	-2.3017	-1.79724	-6.39389	-6.81164	-2.60309	#NAME?	0.82329		0.318482	#NAME?	#NAME?		#NAME?	#NAME?
Q9UGC7	Peptide chain release factor 1-like, mitochondrial	MTRF1L	-3.74383	-4.75953	-4.4464	-3.29511	-6.59064	-6.50413	-5.56975	-3.81852	-4.37338	-4.80695	-3.80189	-4.31125	#NAME?	0.135309		0.442986	#NAME?	#NAME?		#NAME?	#NAME?
P09960	Leukotriene A-4 hydrolase	LTA4H	2.64298	4.11936	3.06145	3.95796	4.1077	3.89958	6.8794	3.03512	2.12284	3.70756	8.21249	1.53939	#NAME?	0.0060141		0.617958	#NAME?	#NAME?		#NAME?	#NAME?
Q9NTZ6	RNA-binding protein 12	RBM12	2.02733	2.65294	1.53041	1.5373	0.989388	1.5941	2.01622	2.10377	1.87192	1.62231	2.43088	1.89534	#NAME?	0.133831		0.268165	#NAME?	#NAME?		#NAME?	#NAME?
Q7Z739	YTH domain-containing family protein 3	YTHDF3	-1.48398	-1.42935	-1.41967	-1.59984	-1.70689	-5.04775	-1.45875	-1.12044	-1.64768	-1.62741	-1.7108	-2.46637	#NAME?	0.0218017		0.442672	#NAME?	#NAME?		#NAME?	#NAME?
Q9UM21	Alpha-1,3-mannosyl-glycoprotein 4-beta-N-acetylglucosaminyltransferase A	MGAT4A	-0.587497	-1.17841	-4.64493	-0.193813	0.925539	-0.00294585	-0.364172	-0.228397	-0.270413	-0.448393	-0.48398	-0.8234	#NAME?	0.000168461		0.51055	#NAME?	#NAME?		#NAME?	#NAME?
Q9NUJ3	T-complex protein 11-like protein 1	TCP11L1	-4.30837	-5.05359	-6.25447	-3.12896	-5.09879	-3.65295	-6.39684	-2.65747	-3.48376	-4.10746	-5.63371	-2.16405	#NAME?	0.411671		0.508973	#NAME?	#NAME?		#NAME?	#NAME?
P23378	Glycine dehydrogenase (decarboxylating), mitochondrial	GLDC	2.65356	2.03143	2.22866	1.65642	2.06129	1.57733	1.4645	1.86658	1.86612	1.91064	1.49039	4.63926	#NAME?	0.027763		0.171466	#NAME?	#NAME?		#NAME?	#NAME?
O75027	ATP-binding cassette sub-family B member 7, mitochondrial	ABCB7	-1.79511	-0.909687	-1.28461	-1.20966	-1.48678	-1.13135	-1.44923	-1.33334	-0.213254	-0.530702	-0.817099	-1.79686	#NAME?	0.163532		0.279452	#NAME?	#NAME?		#NAME?	#NAME?
Q9NVS2	39S ribosomal protein S18a, mitochondrial	MRPS18A	0.125202	0.370823	0.304955	0.124878	-0.474294	-0.0514585	-0.524413	-0.227556	1.51273	1.13192	-0.637669	1.29718	#NAME?	0.0215988		0.35868	#NAME?	#NAME?		#NAME?	#NAME?
P57076	Cilia- and flagella-associated protein 298	CFAP298	-4.6636	-4.34772	-5.1651	-4.8793	-3.94637	-6.5935	-3.05851	-6.16825	-4.44579	-6.5744	-2.33602	-4.06289	#NAME?	0.212125		0.49162	#NAME?	#NAME?		#NAME?	#NAME?
P31150	Rab GDP dissociation inhibitor alpha	GDI1	-0.932826	-1.10491	-0.985079	-0.967223	-1.13813	-1.16401	-0.370589	-0.881969	0.35001	-0.657975	-1.60023	-1.37591	#NAME?	0.000536538		0.292584	#NAME?	#NAME?		#NAME?	#NAME?
P56962	Syntaxin-17	STX17	-2.08854	-3.15435	-3.13615	-3.11706	-2.78567	-3.6734	-4.5955	-1.51397	-1.86352	-1.60557	-5.36493	-2.01738	#NAME?	0.0226279		0.165719	#NAME?	#NAME?		#NAME?	#NAME?
O15160	DNA-directed RNA polymerases I and III subunit RPAC1	POLR1C	0.50446	0.801616	0.880245	0.569877	0.756083	0.525127	1.11381	0.923139	0.406026	1.10401	1.13488	0.514649	#NAME?	0.144248		0.193184	#NAME?	#NAME?		#NAME?	#NAME?
P49356	Protein farnesyltransferase subunit beta	FNTB	-2.20801	-2.28466	-2.94556	-2.58087	-1.81255	-3.12217	-1.97608	-2.20646	-2.66152	-2.38905	-1.16768	-2.79904	#NAME?	0.698279		0.292332	#NAME?	#NAME?		#NAME?	#NAME?
Q9C0D9	Ethanolaminephosphotransferase 1	SELENOI	1.35218	1.44832	1.21394	1.47253	1.74723	1.41591	1.54634	1.52917	1.31722	1.4936	1.83527	1.95559	#NAME?	0.531639		0.171179	#NAME?	#NAME?		#NAME?	#NAME?
P51151	Ras-related protein Rab-9A	RAB9A	-3.32494	-3.9544	-3.0432	-3.5481	-3.33894	-4.95569	-3.66831	-2.78755	-2.83534	-3.50527	-2.49066	-4.76695	#NAME?	0.688736		0.351867	#NAME?	#NAME?		#NAME?	#NAME?
Q8ND30	Liprin-beta-2	PPFIBP2	-3.90468	-4.62284	-2.39168	-3.0561	-3.04232	-0.788075	-2.20238	-0.927889	-0.297414	-0.177751	-5.54573	-5.1425	#NAME?	0.213215		0.585336	#NAME?	#NAME?		#NAME?	#NAME?
Q8IYS2	Uncharacterized protein KIAA2013	KIAA2013	0.404318	0.740653	0.976015	0.203074	0.235391	0.710571	0.884062	0.174668	0.897647	0.970002	0.489755	1.20776	#NAME?	0.702316		0.225646	#NAME?	#NAME?		#NAME?	#NAME?
Q9Y4L1	Hypoxia up-regulated protein 1	HYOU1	3.78128	4.12325	4.63589	4.14383	4.81705	4.26605	4.37382	3.92305	4.5047	4.48828	5.331	4.65888	#NAME?	0.672336		0.252064	#NAME?	#NAME?		#NAME?	#NAME?
P17342	Atrial natriuretic peptide receptor 3	NPR3	-4.04998	-4.23692	-4.06472	-6.43927	-4.17424	-4.7266	-5.00109	-2.62926	-2.59221	-6.23912	-3.48498	-5.00942	#NAME?	0.325344		0.455943	#NAME?	#NAME?		#NAME?	#NAME?
Q8ND04	Protein SMG8	SMG8	-1.11513	-1.22064	-1.4379	-1.20928	-2.09039	-1.48447	1.61058	-1.6612	-1.88814	-2.3641	1.7301	-2.94654	#NAME?	0.00151028		0.506415	#NAME?	#NAME?		#NAME?	#NAME?
O60313	Dynamin-like 120 kDa protein, mitochondrial	OPA1	1.18547	-0.0763129	1.06733	0.712754	0.0936023	0.634111	-0.143853	1.19841	0.45992	1.18204	1.9948	0.799909	#NAME?	0.44561		0.31238	#NAME?	#NAME?		#NAME?	#NAME?
Q9UDW1	Cytochrome b-c1 complex subunit 9	UQCR10	1.22484	1.88681	1.33122	1.57079	1.22735	1.52177	1.84982	1.35756	2.24388	1.61863	1.89813	1.12097	#NAME?	0.334888		0.221034	#NAME?	#NAME?		#NAME?	#NAME?
A8CG34	Nuclear envelope pore membrane protein POM 121C	POM121C	-2.30281	-3.4357	-4.68137	-6.3696	-3.6274	-4.14827	-3.84451	-2.43486	-4.28603	-2.9602	-5.22697	-3.13708	#NAME?	0.525328		0.44592	#NAME?	#NAME?		#NAME?	#NAME?
Q96QK1	Vacuolar protein sorting-associated protein 35	VPS35	2.35125	2.54052	2.92326	2.58879	2.68475	2.61229	4.02472	2.65854	2.56014	2.5292	3.38401	2.21407	#NAME?	0.0137356		0.278302	#NAME?	#NAME?		#NAME?	#NAME?
Q13242	Serine/arginine-rich splicing factor 9	SRSF9	2.67572	2.78436	2.70169	2.63571	3.28758	2.73937	3.0027	2.49939	3.25461	2.83094	3.16914	3.22767	#NAME?	0.695953		0.193336	#NAME?	#NAME?		#NAME?	#NAME?
Q9H098	Protein FAM107B	FAM107B	-1.93306	-1.94302	-2.79303	-2.87813	-3.39433	-3.509	-1.43256	-1.15821	-1.87183	-2.12606	-2.86759	-6.18022	#NAME?	0.0473032		0.135682	#NAME?	#NAME?		#NAME?	#NAME?
Q86X76	Deaminated glutathione amidase	NIT1	-1.25396	-1.46566	-0.775921	-0.63454	-0.434187	1.88408	-2.20301	-0.496618	2.77873	2.97998	-0.654624	-1.77169	#NAME?	0.198478		0.552157	#NAME?	#NAME?		#NAME?	#NAME?
O43181	NADH dehydrogenase [ubiquinone] iron-sulfur protein 4, mitochondrial	NDUFS4	0.493537	-0.705473	0.381238	-0.353249	-0.203717	-0.11346	0.726445	-0.06829	0.277479	0.162373	0.571561	-0.598848	#NAME?	0.916511		0.261974	#NAME?	#NAME?		#NAME?	#NAME?
Q9Y4C2	TRPM8 channel-associated factor 1	TCAF1	0.0942715	-0.605445	-0.265251	-0.279322	0.890818	0.0419294	0.930051	0.0258484	0.100417	-0.549418	0.282917	0.769191	#NAME?	0.921624		0.280334	#NAME?	#NAME?		#NAME?	#NAME?
Q8WUW1	Protein BRICK1	BRK1	-2.12396	-1.78709	-2.29008	-2.55942	-3.92103	-4.08625	-1.34116	-2.58282	-1.88957	-2.38524	-2.85437	-3.49968	#NAME?	0.588734		0.369166	#NAME?	#NAME?		#NAME?	#NAME?
Q9H9L3	Interferon-stimulated 20 kDa exonuclease-like 2	ISG20L2	-6.25937	-3.81208	-2.84512	-4.14631	-6.53312	-6.5491	-4.00227	-2.72155	-2.86956	-3.60112	-7.05211	-6.64511	#NAME?	0.737264		0.542233	#NAME?	#NAME?		#NAME?	#NAME?
Q9H0C8	Integrin-linked kinase-associated serine/threonine phosphatase 2C	ILKAP	-0.198772	-0.080492	0.907834	-0.142385	0.745449	0.59897	-0.740844	-0.00899208	1.48209	1.54661	-0.462404	2.34981	#NAME?	0.0626083		0.389277	#NAME?	#NAME?		#NAME?	#NAME?
Q99720	Sigma non-opioid intracellular receptor 1	SIGMAR1	-0.52542	0.634506	1.5501	0.338534	-0.257048	0.610295	1.40641	-0.284622	0.570149	0.711788	1.63478	0.309645	#NAME?	0.933268		0.332864	#NAME?	#NAME?		#NAME?	#NAME?
Q9C0C2	182 kDa tankyrase-1-binding protein	TNKS1BP1	-2.34081	-3.11956	-2.20429	-3.02299	-3.06955	0.930485	0.283887	-2.49088	-3.55929	-3.31276	1.4128	-1.88507	#NAME?	0.583482		0.5459	#NAME?	#NAME?		#NAME?	#NAME?
Q8N4B1	Sesquipedalian-1	PHETA1	-3.21694	-6.40566	-6.33371	-3.33703	-3.12249	-6.64691	-2.48159	-5.91394	-2.9992	-6.37306	-1.31169	-6.48449	#NAME?	0.609033		0.58313	#NAME?	#NAME?		#NAME?	#NAME?
O43708	Maleylacetoacetate isomerase	GSTZ1	-0.965563	-2.06362	-1.55591	-1.06057	-1.06501	-0.539097	0.321117	-1.16019	-1.66335	-1.81978	0.331299	-1.19262	#NAME?	0.219551		0.344373	#NAME?	#NAME?		#NAME?	#NAME?
O75643	U5 small nuclear ribonucleoprotein 200 kDa helicase	SNRNP200	2.64782	2.34778	5.63477	2.4425	3.84846	2.18362	1.87179	2.88868	4.85146	4.80767	2.0282	5.60218	#NAME?	0.697354		0.490839	#NAME?	#NAME?		#NAME?	#NAME?
Q02241	Kinesin-like protein KIF23	KIF23	-2.67256	-5.64252	-2.60136	-2.64726	-2.15189	-6.60118	-4.49019	-1.98924	-3.70126	-2.08095	-4.22548	-2.82692	#NAME?	0.241984		0.500451	#NAME?	#NAME?		#NAME?	#NAME?
P20585	DNA mismatch repair protein Msh3	MSH3	-5.3663	-3.38414	-4.58789	-2.8414	-4.68435	-3.91119	-2.36321	-5.06813	-4.93562	-3.98175	-1.58122	-4.2276	#NAME?	0.37528		0.436288	#NAME?	#NAME?		#NAME?	#NAME?
O60524	Nuclear export mediator factor NEMF	NEMF	-1.04224	-1.70124	-1.30741	-1.4029	-0.403027	-1.11917	-2.41921	-0.695802	-0.419706	-1.26796	-0.124193	-0.103677	#NAME?	0.148719		0.324238	#NAME?	#NAME?		#NAME?	#NAME?
Q8N2K1	Ubiquitin-conjugating enzyme E2 J2	UBE2J2	-6.14283	-6.37198	-6.4661	-6.45233	-6.4229	-4.47426	-2.56011	-5.98984	-6.48157	-6.27918	-7.03922	-6.60036	#NAME?	0.131586		0.230021	#NAME?	#NAME?		#NAME?	#NAME?
P54886	Delta-1-pyrroline-5-carboxylate synthase	ALDH18A1	5.32314	5.39341	5.8146	5.65195	5.93576	5.58374	5.24177	5.42743	5.83579	5.89902	6.26323	6.36437	#NAME?	0.192651		0.221504	#NAME?	#NAME?		#NAME?	#NAME?
O43920	NADH dehydrogenase [ubiquinone] iron-sulfur protein 5	NDUFS5	0.66405	0.906019	0.345771	0.612452	1.00397	0.563869	1.96491	0.882218	0.679545	0.878599	1.86203	-0.329166	#NAME?	0.0149906		0.307	#NAME?	#NAME?		#NAME?	#NAME?
Q70J99	Protein unc-13 homolog D	UNC13D	-1.8187	-1.16073	-4.57071	-1.64847	-1.63096	-3.16881	0.728108	-2.59835	0.359449	-2.17694	-4.919	-2.22284	#NAME?	0.314481		0.528136	#NAME?	#NAME?		#NAME?	#NAME?
P51148	Ras-related protein Rab-5C	RAB5C	3.2587	3.57136	3.55726	3.43593	3.74136	3.54352	3.78238	3.14898	3.72112	3.73345	4.07327	3.71611	#NAME?	0.195163		0.177865	#NAME?	#NAME?		#NAME?	#NAME?
Q02809	Procollagen-lysine,2-oxoglutarate 5-dioxygenase 1	PLOD1	2.34033	2.41277	2.86525	2.0032	2.47396	2.74496	2.95586	2.46722	2.30739	2.44951	3.23282	2.7004	#NAME?	0.769247		0.212122	#NAME?	#NAME?		#NAME?	#NAME?
Q9HD45	Transmembrane 9 superfamily member 3	TM9SF3	2.53892	2.30001	2.33123	2.16258	0.84057	1.98244	1.78703	2.34507	2.553	2.50175	2.16725	2.35625	#NAME?	0.111498		0.259098	#NAME?	#NAME?		#NAME?	#NAME?
O75879	Glutamyl-tRNA(Gln) amidotransferase subunit B, mitochondrial	GATB	-3.64605	-2.28785	-2.21412	-2.26711	-3.5109	-3.83324	-4.07943	-3.24754	-2.28408	-2.09216	-2.77446	-1.0434	#NAME?	0.53789		0.373034	#NAME?	#NAME?		#NAME?	#NAME?
Q8WVM7	Cohesin subunit SA-1	STAG1	-3.5564	-4.33965	-2.50086	-6.28187	-4.39421	-1.80726	-3.77891	-2.96604	-3.39161	-3.47987	-2.32027	-4.33205	#NAME?	0.0916653		0.435248	#NAME?	#NAME?		#NAME?	#NAME?
Q9H5Z1	Probable ATP-dependent RNA helicase DHX35	DHX35	-6.1327	-6.33877	-2.92349	-6.479	-6.49949	-3.5939	-6.38184	-2.25902	-6.38434	-1.68232	-6.8966	-6.48964	#NAME?	0.423279		0.312267	#NAME?	#NAME?		#NAME?	#NAME?
Q8TCD1	UPF0729 protein C18orf32	C18orf32	-6.28728	-6.44662	-6.21444	-6.36775	-5.84498	-6.85904	-4.89141	-6.14694	-5.13108	-6.18903	-6.93222	-6.88246	#NAME?	0.0560705		0.307825	#NAME?	#NAME?		#NAME?	#NAME?
Q96PC5	Melanoma inhibitory activity protein 2	MIA2	-0.756149	-0.339957	-0.260404	-0.985711	-1.18364	-0.847532	-0.830286	-0.53906	-0.0207704	-0.26833	-0.614766	-0.817868	#NAME?	0.78105		0.213718	#NAME?	#NAME?		#NAME?	#NAME?
Q7Z434	Mitochondrial antiviral-signaling protein	MAVS	1.21039	-0.343753	3.45034	-0.381236	-0.200922	-0.708882	0.58735	0.742077	0.644068	0.827332	1.25466	1.51239	#NAME?	0.00623915		0.423655	#NAME?	#NAME?		#NAME?	#NAME?
P21291	Cysteine and glycine-rich protein 1	CSRP1	2.36267	2.02287	1.65251	1.78318	0.748698	1.86491	1.77592	2.36766	2.06424	1.98362	1.55279	2.15201	#NAME?	0.187045		0.243568	#NAME?	#NAME?		#NAME?	#NAME?
O43264	Centromere/kinetochore protein zw10 homolog	ZW10	-1.60862	-0.226009	-0.797895	-1.0423	-0.0353454	0.750091	1.6805	-0.42869	-0.270296	-0.976041	0.248927	-1.00346	#NAME?	0.695865		0.368502	#NAME?	#NAME?		#NAME?	#NAME?
Q16611	Bcl-2 homologous antagonist/killer	BAK1	-1.38774	-1.4539	-2.22069	-1.80245	-1.56582	-1.36047	-2.10039	-1.26478	-0.83584	-1.42632	-1.17207	-1.62814	#NAME?	0.570681		0.227252	#NAME?	#NAME?		#NAME?	#NAME?
Q5T9A4	ATPase family AAA domain-containing protein 3B	ATAD3B	1.30193	2.14224	2.23201	2.0361	2.04586	1.91045	2.16313	1.89552	1.36975	2.11277	2.13218	3.75844	#NAME?	0.0763531		0.293864	#NAME?	#NAME?		#NAME?	#NAME?
Q9NQZ2	Something about silencing protein 10	UTP3	0.668688	0.41662	0.147019	0.421843	0.62069	0.432891	1.31883	0.500037	1.15509	0.463666	0.964732	-0.232918	#NAME?	0.0272885		0.243615	#NAME?	#NAME?		#NAME?	#NAME?
Q13043	Serine/threonine-protein kinase 4	STK4	0.880048	1.10005	1.30107	1.01719	1.31271	0.685048	0.862395	1.60774	0.908664	1.5637	1.15996	1.34125	#NAME?	0.570382		0.191265	#NAME?	#NAME?		#NAME?	#NAME?
Q4G0N4	NAD kinase 2, mitochondrial	NADK2	0.949332	1.0765	1.08774	1.24213	0.807917	0.881953	0.307963	0.6041	1.80918	1.68542	1.15619	2.12067	#NAME?	0.00481484		0.272991	#NAME?	#NAME?		#NAME?	#NAME?
Q9BVG8	Kinesin-like protein KIFC3	KIFC3	-6.00691	-5.97519	-5.29847	-6.46071	-5.44553	-6.65029	-6.56848	-6.17196	-6.41075	-4.30435	-6.88189	-2.97243	#NAME?	0.0349198		0.421207	#NAME?	#NAME?		#NAME?	#NAME?
Q6P158	Putative ATP-dependent RNA helicase DHX57	DHX57	-3.61312	-4.97635	-2.8738	-4.64246	-4.65357	-6.42712	-3.00936	-0.551897	-5.34744	-5.21438	-3.76239	-6.24842	#NAME?	0.271924		0.508755	#NAME?	#NAME?		#NAME?	#NAME?
Q9Y2V7	Conserved oligomeric Golgi complex subunit 6	COG6	-0.306924	-0.315619	-0.341944	-0.59403	-0.323069	-0.114952	0.477392	-0.217439	-0.49064	-0.188061	-0.402425	-0.0763068	#NAME?	0.101741		0.183176	#NAME?	#NAME?		#NAME?	#NAME?
Q0VDF9	Heat shock 70 kDa protein 14	HSPA14	2.36146	1.66724	0.456027	1.36839	1.56476	0.488938	-1.15048	2.55812	3.09304	3.28773	-0.493917	3.55456	#NAME?	0.0400137		0.490374	#NAME?	#NAME?		#NAME?	#NAME?
Q9H0A8	COMM domain-containing protein 4	COMMD4	-1.71407	-1.60954	-2.80044	-3.96748	-4.28732	-3.65218	-3.02092	-2.44261	-2.6409	-2.33052	-2.69012	-2.80152	#NAME?	0.00424954		0.350739	#NAME?	#NAME?		#NAME?	#NAME?
P48444	Coatomer subunit delta	ARCN1	2.18464	2.18149	2.49333	2.26203	2.33053	1.72022	3.60516	2.1345	1.6478	1.83998	4.51677	1.59116	#NAME?	0.00413036		0.360519	#NAME?	#NAME?		#NAME?	#NAME?
Q96S55	ATPase WRNIP1	WRNIP1	0.755311	1.08546	0.797009	0.770156	0.505834	0.472957	2.33445	0.94485	-0.259471	0.959224	1.96221	0.35959	#NAME?	0.00588361		0.319022	#NAME?	#NAME?		#NAME?	#NAME?
P11047	Laminin subunit gamma-1	LAMC1	1.06629	0.970293	0.20909	1.03258	1.69674	0.782744	2.50973	1.65266	0.403746	0.0936662	1.87334	1.14472	#NAME?	0.183021		0.320021	#NAME?	#NAME?		#NAME?	#NAME?
O60678	Protein arginine N-methyltransferase 3	PRMT3	-2.90871	-4.4048	-6.39125	-6.24548	-2.9151	-5.75931	-3.24133	-2.49739	-4.06961	-2.30359	-6.81496	-6.56029	#NAME?	0.644142		0.522914	#NAME?	#NAME?		#NAME?	#NAME?
Q5T447	E3 ubiquitin-protein ligase HECTD3	HECTD3	-5.74196	-5.31522	-5.14137	-6.3473	-4.8385	-4.58136	-3.89125	-3.7496	-6.34677	-6.25925	-5.39923	-4.09839	#NAME?	0.195143		0.370203	#NAME?	#NAME?		#NAME?	#NAME?
P29353	SHC-transforming protein 1	SHC1	-0.821175	-3.38918	-3.19501	-3.3008	-2.77466	-3.61813	-6.6883	-0.318306	-1.28682	0.342798	-7.03441	-1.03091	#NAME?	0.0233649		0.1805	#NAME?	#NAME?		#NAME?	#NAME?
P53621	Coatomer subunit alpha	COPA	0.890597	1.0793	2.22789	1.36363	1.1622	1.5476	3.41666	0.648183	1.13965	0.941588	4.06324	0.528972	#NAME?	0.0218381		0.411182	#NAME?	#NAME?		#NAME?	#NAME?
Q86YV5	Inactive tyrosine-protein kinase PRAG1	PRAG1	-6.1178	-6.2037	-6.40778	-3.61837	-6.39163	-2.86886	-2.73374	-6.16171	-6.50314	-6.35937	-1.5484	-6.55609	#NAME?	0.473848		0.290947	#NAME?	#NAME?		#NAME?	#NAME?
Q9NWU5	39S ribosomal protein L22, mitochondrial	MRPL22	1.00156	1.36327	1.1381	1.52149	1.33803	1.67251	0.793531	1.11042	1.97112	1.83088	1.56423	2.14004	#NAME?	0.120861		0.229214	#NAME?	#NAME?		#NAME?	#NAME?
O95900	Mitochondrial mRNA pseudouridine synthase TRUB2	TRUB2	-2.73578	-3.64857	-4.18193	-6.36462	-2.91483	-5.53981	-4.45321	-2.22078	-2.15295	-6.44301	-2.14155	-6.52147	#NAME?	0.425271		0.242096	#NAME?	#NAME?		#NAME?	#NAME?
Q96N46	Tetratricopeptide repeat protein 14	TTC14	-1.53437	0.611494	-0.00636615	0.130825	0.733447	-0.347439	0.1232	0.613931	-0.389527	0.02491	1.36598	-0.243577	#NAME?	0.614162		0.317887	#NAME?	#NAME?		#NAME?	#NAME?
P42330	Aldo-keto reductase family 1 member C3	AKR1C3	5.14814	5.37721	4.56398	5.08828	3.67244	5.16256	5.02507	5.01432	5.11796	5.04228	5.0273	5.49649	#NAME?	0.0188594		0.285133	#NAME?	#NAME?		#NAME?	#NAME?
Q9GZS1	DNA-directed RNA polymerase I subunit RPA49	POLR1E	-0.68466	-0.809488	-1.36644	-0.861267	-0.85429	-0.794914	-1.43159	-0.925859	-0.925102	-0.552102	0.912056	-0.740072	#NAME?	0.0190823		0.284731	#NAME?	#NAME?		#NAME?	#NAME?
P09661	U2 small nuclear ribonucleoprotein A'	SNRPA1	2.06294	1.97279	2.10867	2.24813	1.92356	2.06129	2.9842	2.11865	1.93326	2.06668	2.44388	1.98729	#NAME?	0.0150676		0.192765	#NAME?	#NAME?		#NAME?	#NAME?
O75116	Rho-associated protein kinase 2	ROCK2	1.19706	1.83676	1.44581	1.35073	2.14905	1.35293	2.38343	1.33551	1.73641	1.64287	2.63214	1.1014	#NAME?	0.300445		0.249904	#NAME?	#NAME?		#NAME?	#NAME?
P51398	28S ribosomal protein S29, mitochondrial	DAP3	0.168213	0.284959	2.81207	0.266763	1.38007	-0.251272	0.987308	0.664058	0.745131	0.489466	1.87218	0.574872	#NAME?	0.104802		0.112034	#NAME?	#NAME?		#NAME?	#NAME?
O95819	Mitogen-activated protein kinase kinase kinase kinase 4	MAP4K4	-2.16036	-3.82901	-2.21201	-0.935373	0.690646	-1.93882	-1.27968	-0.752856	-1.8413	-1.31832	-1.01948	-1.81036	#NAME?	0.01553		0.393823	#NAME?	#NAME?		#NAME?	#NAME?
Q92544	Transmembrane 9 superfamily member 4	TM9SF4	2.15513	2.21912	2.75076	2.33243	1.23509	1.95659	2.41395	1.99691	2.13926	2.42995	2.72398	2.27318	#NAME?	0.160637		0.221353	#NAME?	#NAME?		#NAME?	#NAME?
O95757	Heat shock 70 kDa protein 4L	HSPA4L	0.466675	0.432489	1.06487	0.712446	1.36389	0.950643	1.09181	1.33235	1.1111	0.882808	0.957632	0.735047	#NAME?	0.24451		0.186622	#NAME?	#NAME?		#NAME?	#NAME?
Q9NXC5	GATOR complex protein MIOS	MIOS	-6.23967	-5.48594	-5.4044	-4.64714	-3.59661	-4.4797	-4.20402	-3.31164	-4.65721	-6.37088	-5.58878	-3.44319	#NAME?	0.57786		0.379624	#NAME?	#NAME?		#NAME?	#NAME?
Q7Z7H5	Transmembrane emp24 domain-containing protein 4	TMED4	1.77798	2.15922	2.88503	1.96682	2.42955	1.9949	2.61359	1.84179	2.0745	2.23074	3.39266	2.51612	#NAME?	0.514963		0.242651	#NAME?	#NAME?		#NAME?	#NAME?
Q92733	Proline-rich protein PRCC	PRCC	-1.4285	-1.2049	-1.34866	-1.37053	-1.29152	-2.33939	-0.868768	-2.20207	-1.02224	-1.3547	-2.11207	0.435185	#NAME?	0.0906871		0.309807	#NAME?	#NAME?		#NAME?	#NAME?
Q92766	Ras-responsive element-binding protein 1	RREB1	-2.81285	-6.39976	-4.52145	-6.32019	-6.62659	-6.46859	-4.4628	-5.89054	-6.48324	-6.29374	-2.70514	-4.60669	#NAME?	0.884054		0.451214	#NAME?	#NAME?		#NAME?	#NAME?
Q15643	Thyroid receptor-interacting protein 11	TRIP11	-1.12187	-0.373651	-0.487859	0.102724	-0.117154	-0.00381844	1.35891	-1.45194	0.302599	-1.28271	1.85733	-0.556025	#NAME?	0.0273011		0.371633	#NAME?	#NAME?		#NAME?	#NAME?
Q9H0W8	Protein SMG9	SMG9	-1.69535	-1.91355	-2.0944	-1.35287	-2.63399	-1.29941	-0.460237	-0.668829	-1.52795	-0.9693	-1.37479	-3.87547	#NAME?	0.0675608		0.352164	#NAME?	#NAME?		#NAME?	#NAME?
P25325	3-mercaptopyruvate sulfurtransferase	MPST	5.23031	5.35747	5.47146	5.24552	5.83497	4.98096	6.07593	5.1956	5.42027	5.51234	5.97709	5.14531	#NAME?	0.511076		0.200976	#NAME?	#NAME?		#NAME?	#NAME?
P13688	Carcinoembryonic antigen-related cell adhesion molecule 1	CEACAM1	-0.558707	-0.355443	-0.384144	-0.767243	0.153858	-0.849233	-0.570768	-0.403423	0.148934	-0.0548903	-0.395927	-0.334785	#NAME?	0.514343		0.191676	#NAME?	#NAME?		#NAME?	#NAME?
P36957	Dihydrolipoyllysine-residue succinyltransferase component of 2-oxoglutarate dehydrogenase complex, mitochondrial	DLST	2.46406	3.12068	3.17988	3.06967	2.28786	3.07766	3.0211	2.61319	3.12737	2.9765	3.57865	3.10086	#NAME?	0.645163		0.202975	#NAME?	#NAME?		#NAME?	#NAME?
Q9NUD5	Zinc finger CCHC domain-containing protein 3	ZCCHC3	2.17727	2.16322	2.38632	2.45286	2.09949	2.08942	3.13194	2.19505	2.14215	2.07117	3.3554	1.89673	#NAME?	0.00852011		0.237309	#NAME?	#NAME?		#NAME?	#NAME?
P51570	Galactokinase	GALK1	1.92847	1.61633	1.74166	1.53792	1.53103	1.72079	1.4871	1.79502	1.60371	1.69332	2.75599	1.95603	#NAME?	0.0293008		0.202492	#NAME?	#NAME?		#NAME?	#NAME?
P19447	General transcription and DNA repair factor IIH helicase subunit XPB	ERCC3	-2.65362	-3.52908	-1.34417	-1.79472	-7.20241	-0.993163	-1.25403	-3.53569	-5.99441	-0.0618161	-1.33081	-2.04204	#NAME?	0.860898		0.549728	#NAME?	#NAME?		#NAME?	#NAME?
Q14012	Calcium/calmodulin-dependent protein kinase type 1	CAMK1	0.578592	-0.0175513	0.314481	-0.41143	0.281023	-0.620048	0.814759	0.411011	0.950364	1.0033	-1.36384	0.0896588	#NAME?	0.172042		0.296699	#NAME?	#NAME?		#NAME?	#NAME?
Q9HBK9	Arsenite methyltransferase	AS3MT	-1.79097	-1.31377	-0.68206	-0.251374	-1.92321	-0.589452	-1.3824	-0.786058	0.34046	0.325093	-1.51329	-1.64035	#NAME?	0.554953		0.315715	#NAME?	#NAME?		#NAME?	#NAME?
O14734	Acyl-coenzyme A thioesterase 8	ACOT8	-0.970654	-0.540618	0.103352	-0.682195	-0.445242	-0.552832	-0.514586	-0.845439	-0.350167	0.424635	-0.2446	-0.296217	#NAME?	0.721614		0.210302	#NAME?	#NAME?		#NAME?	#NAME?
Q53T59	HCLS1-binding protein 3	HS1BP3	-2.23306	-4.40136	1.64859	1.51556	-1.56545	1.36152	0.16382	-1.66456	1.22048	0.845767	0.827582	-1.96739	#NAME?	0.215281		0.516648	#NAME?	#NAME?		#NAME?	#NAME?
P09466	Glycodelin	PAEP	-6.28677	-4.14838	-6.54829	-6.46608	-4.40198	-2.72506	-6.34525	-6.00827	-3.1822	-3.21529	-2.50858	-6.48649	#NAME?	0.743331		0.471746	#NAME?	#NAME?		#NAME?	#NAME?
Q9NRC6	Spectrin beta chain, non-erythrocytic 5	SPTBN5	-3.92922	-6.21394	-6.47004	-6.29161	-4.50187	-6.52111	-6.52061	-3.00705	-6.31247	-6.47393	-6.83429	-3.53614	#NAME?	0.394444		0.207218	#NAME?	#NAME?		#NAME?	#NAME?
P35658	Nuclear pore complex protein Nup214	NUP214	0.365383	0.740964	1.66298	1.2817	1.20599	0.752427	2.31493	0.628661	0.748663	0.727073	2.20321	0.854629	#NAME?	0.275586		0.244621	#NAME?	#NAME?		#NAME?	#NAME?
O14618	Copper chaperone for superoxide dismutase	CCS	0.486701	0.432676	0.117433	-0.204267	0.970014	0.104464	1.3697	0.952118	0.267809	0.432643	0.540704	-0.24571	#NAME?	0.501479		0.235041	#NAME?	#NAME?		#NAME?	#NAME?
O43488	Aflatoxin B1 aldehyde reductase member 2	AKR7A2	2.11635	1.90351	2.37959	2.08172	2.58848	2.30159	2.8198	2.33473	2.65718	2.59993	2.4733	1.64167	#NAME?	0.266681		0.192563	#NAME?	#NAME?		#NAME?	#NAME?
Q7Z4R8	UPF0669 protein C6orf120	C6orf120	-0.495973	-2.05799	-0.69964	-0.757689	-1.00038	-0.493097	-0.906299	-0.381416	-0.0441345	-0.409569	-2.64831	0.889242	#NAME?	0.156599		0.334047	#NAME?	#NAME?		#NAME?	#NAME?
Q9BSJ2	Gamma-tubulin complex component 2	TUBGCP2	-1.74319	-1.28926	-1.35934	-1.9085	-1.53076	-1.77817	-0.280917	-0.88602	-1.50403	-2.7185	-1.7079	-0.873527	#NAME?	0.017131		0.273056	#NAME?	#NAME?		#NAME?	#NAME?
Q96A26	Protein FAM162A	FAM162A	3.28342	3.32618	3.11766	3.08548	3.03694	3.38528	3.82401	3.01851	3.45535	2.86893	4.20646	3.10946	#NAME?	0.0137271		0.20796	#NAME?	#NAME?		#NAME?	#NAME?
Q96S44	EKC/KEOPS complex subunit TP53RK	TP53RK	-1.75496	-0.938697	-1.15862	-1.26625	-1.01001	-1.10474	-0.525401	-1.76924	-1.46311	-1.31036	0.202907	-0.874772	#NAME?	0.0705124		0.248885	#NAME?	#NAME?		#NAME?	#NAME?
Q8N0X7	Spartin	SPART	-4.00633	-2.74177	-4.57634	-6.23554	-6.60186	-2.33458	0.772938	-6.14091	-6.23696	-6.29808	-0.765593	-6.6199	#NAME?	0.190865		0.201322	#NAME?	#NAME?		#NAME?	#NAME?
Q08379	Golgin subfamily A member 2	GOLGA2	0.448767	-0.16581	-0.163893	-0.747283	0.124221	0.478412	-0.312676	0.253529	-0.0689137	0.129393	0.965602	0.335732	#NAME?	0.904805		0.221375	#NAME?	#NAME?		#NAME?	#NAME?
Q96CM8	Medium-chain acyl-CoA ligase ACSF2, mitochondrial	ACSF2	2.67126	2.89922	3.06913	2.59348	3.31208	2.9545	2.94698	2.79265	2.63025	3.20102	3.53744	3.50011	#NAME?	0.457638		0.184798	#NAME?	#NAME?		#NAME?	#NAME?
P05388	60S acidic ribosomal protein P0	RPLP0	5.23118	5.1996	5.18	5.08851	4.5371	5.04064	5.45594	5.17195	5.02416	5.12992	5.48371	4.95204	#NAME?	0.73269		0.156779	#NAME?	#NAME?		#NAME?	#NAME?
P08047	Transcription factor Sp1	SP1	-6.13904	-4.68147	-5.26317	-5.56474	-6.42251	-6.53512	-6.60944	-3.69146	-3.53917	-6.42816	-6.95594	-6.62747	#NAME?	0.112738		0.125734	#NAME?	#NAME?		#NAME?	#NAME?
P43121	Cell surface glycoprotein MUC18	MCAM	-3.48735	-3.53026	-2.70744	-3.5862	-3.94152	-2.48737	-4.00613	-1.89934	-3.02538	-2.33312	-3.08183	-3.71673	#NAME?	0.464246		0.279599	#NAME?	#NAME?		#NAME?	#NAME?
Q9BTC0	Death-inducer obliterator 1	DIDO1	-1.93887	-2.38659	-2.38679	-1.86146	-3.6603	-2.75879	-0.118639	-2.06531	-2.70558	-3.3585	-1.84156	-2.92612	#NAME?	0.246077		0.329511	#NAME?	#NAME?		#NAME?	#NAME?
Q9UI30	Multifunctional methyltransferase subunit TRM112-like protein	TRMT112	1.55865	1.35339	1.14752	1.30365	1.02294	1.27927	1.28235	1.76137	1.40396	2.06199	1.51925	0.764783	#NAME?	0.0755692		0.18805	#NAME?	#NAME?		#NAME?	#NAME?
Q9Y2R0	Cytochrome c oxidase assembly factor 3 homolog, mitochondrial	COA3	-0.0968994	0.375304	-0.684583	-1.12848	-1.1071	-1.1291	0.657912	-0.892522	-0.210449	-0.550967	0.26595	-1.36468	#NAME?	0.736018		0.279349	#NAME?	#NAME?		#NAME?	#NAME?
O95159	Zinc finger protein-like 1	ZFPL1	2.06823	2.98041	3.43158	2.88883	1.98232	2.86269	2.64905	1.81882	3.50122	2.77562	3.42689	3.63392	#NAME?	0.663218		0.265243	#NAME?	#NAME?		#NAME?	#NAME?
P51116	Fragile X mental retardation syndrome-related protein 2	FXR2	0.243005	-0.0936625	0.123897	-0.408934	-0.177915	-0.467498	-2.3724	0.722977	1.63242	1.15039	-0.626199	0.857299	#NAME?	0.00241961		0.357599	#NAME?	#NAME?		#NAME?	#NAME?
O95573	Long-chain-fatty-acid--CoA ligase 3	ACSL3	4.39448	4.58477	5.0561	4.60994	3.79492	5.0924	5.21379	4.52766	4.32401	4.66728	5.48506	4.64877	#NAME?	0.872779		0.222326	#NAME?	#NAME?		#NAME?	#NAME?
O95630	STAM-binding protein	STAMBP	-0.660719	0.234759	0.154692	-1.54486	-0.518481	-0.326011	2.46914	-0.563443	-0.886925	-0.662043	1.70627	-2.31886	#NAME?	0.0441363		0.400794	#NAME?	#NAME?		#NAME?	#NAME?
P40123	Adenylyl cyclase-associated protein 2	CAP2	1.95991	2.14285	0.776501	0.0632269	1.1828	-1.13235	1.05826	0.849613	1.15145	1.35075	1.39984	1.11062	#NAME?	0.0011636		0.321266	#NAME?	#NAME?		#NAME?	#NAME?
Q86VW0	SEC14 domain and spectrin repeat-containing protein 1	SESTD1	-0.117626	0.625607	-0.565537	-0.235945	-0.214272	-1.82685	-0.188774	0.38913	-0.311275	-0.288311	-0.197329	-0.366441	#NAME?	0.0352713		0.228605	#NAME?	#NAME?		#NAME?	#NAME?
Q8N961	Ankyrin repeat and BTB/POZ domain-containing protein 2	ABTB2	-2.17379	-6.35936	-5.25125	-5.27944	-3.89881	-3.98795	-3.6093	-4.35104	-5.24971	-3.68382	-2.97467	-4.85027	#NAME?	0.261477		0.371966	#NAME?	#NAME?		#NAME?	#NAME?
O94966	Ubiquitin carboxyl-terminal hydrolase 19	USP19	-1.51116	-2.40757	-1.86398	-2.16133	-3.25295	-2.04526	-0.796026	-2.07826	-3.95635	-1.92539	-0.995702	-1.57394	#NAME?	0.183485		0.319429	#NAME?	#NAME?		#NAME?	#NAME?
Q9BSV6	tRNA-splicing endonuclease subunit Sen34	TSEN34	-4.34569	-4.49603	-3.43834	-4.2413	-1.86632	-2.54352	-4.19253	-2.19414	-3.60512	-3.6166	-3.34228	-1.97614	#NAME?	0.656256		0.334064	#NAME?	#NAME?		#NAME?	#NAME?
[truncated: 3,257 more rows]
